# Supplementary material for: A Process for Modelling Diffuse Scattering from Disordered Molecular Crystals, Illustrated by Application to Monoclinic 9-Chloro-10-methylanthracene
Source: Hindawi journal article supplement (doi:10.1155/2015/878463), 2015-01-01
Supplement: f2 [file 878463.f2.zip]

Archive with 162 entries (156 files):
- 878463.f2/
- 878463.f2/CMA_simulations/
- 878463.f2/CMA_simulations/0kl.pgm
- 878463.f2/CMA_simulations/0kl_Bragg
- 878463.f2/CMA_simulations/0kl_Bragg.pgm
- 878463.f2/CMA_simulations/Building_the_model.aux
- 878463.f2/CMA_simulations/Building_the_model.dvi
- 878463.f2/CMA_simulations/Building_the_model.log
- 878463.f2/CMA_simulations/Building_the_model.pdf
- 878463.f2/CMA_simulations/Building_the_model.tex
- 878463.f2/CMA_simulations/Building_the_model.tex.bak
- 878463.f2/CMA_simulations/Building_the_model.tex.dic
- 878463.f2/CMA_simulations/Classify_v2.exe
- 878463.f2/CMA_simulations/classify_v2.f
- 878463.f2/CMA_simulations/CMA_contacts_excel_sort
- 878463.f2/CMA_simulations/CMA_contacts_grouped
- 878463.f2/CMA_simulations/CMA_contacts_grouped_trimmed
- 878463.f2/CMA_simulations/CMA_contacts_initial
- 878463.f2/CMA_simulations/CMA_force_const_Chan
- 878463.f2/CMA_simulations/CMA_initial_random_occ.txt
- 878463.f2/CMA_simulations/CMA_occ_contacts_initial
- 878463.f2/CMA_simulations/CMA_occ_contacts_sorted
- 878463.f2/CMA_simulations/CMA_occ_correlations_Epstein
- 878463.f2/CMA_simulations/cur.txt
- 878463.f2/CMA_simulations/diffuse.mono0kl
- 878463.f2/CMA_simulations/diffuse.mono0kl_Bragg
- 878463.f2/CMA_simulations/diffuse.monoh0l
- 878463.f2/CMA_simulations/diffuse.monoh0l_Bragg
- 878463.f2/CMA_simulations/diffuse.monohk0
- 878463.f2/CMA_simulations/diffuse.monohk0_Bragg
- 878463.f2/CMA_simulations/Eric_Chan_springs.exe
- 878463.f2/CMA_simulations/eric_trim_disorder.f
- 878463.f2/CMA_simulations/Gen_contacts.inp
- 878463.f2/CMA_simulations/Gen_contacts.screen_output
- 878463.f2/CMA_simulations/Gen_occ_contacts.inp
- 878463.f2/CMA_simulations/h0l.pgm
- 878463.f2/CMA_simulations/h0l_Bragg
- 878463.f2/CMA_simulations/h0l_Bragg.pgm
- 878463.f2/CMA_simulations/hk0.pgm
- 878463.f2/CMA_simulations/hk0_Bragg
- 878463.f2/CMA_simulations/hk0_Bragg.pgm
- 878463.f2/CMA_simulations/MC_occ.inp
- 878463.f2/CMA_simulations/Model_1.inp
- 878463.f2/CMA_simulations/Model_1.pgm
- 878463.f2/CMA_simulations/Model_1.sh
- 878463.f2/CMA_simulations/Model_1_0kl
- 878463.f2/CMA_simulations/Model_1_0kl.pgm
- 878463.f2/CMA_simulations/Model_1_h0l
- 878463.f2/CMA_simulations/Model_1_h0l.pgm
- 878463.f2/CMA_simulations/Model_1_hk0
- 878463.f2/CMA_simulations/Model_1_hk0.pgm
- 878463.f2/CMA_simulations/Model_1_in0kl
- 878463.f2/CMA_simulations/Model_1_inh0l
- 878463.f2/CMA_simulations/Model_1_inhk0
- 878463.f2/CMA_simulations/Model_2.inp
- 878463.f2/CMA_simulations/Model_2.sh
- 878463.f2/CMA_simulations/Model_2_0kl.pgm
- 878463.f2/CMA_simulations/Model_2_h0l.pgm
- 878463.f2/CMA_simulations/Model_2_hk0.pgm
- 878463.f2/CMA_simulations/Model_2_in0kl
- 878463.f2/CMA_simulations/Model_2_inh0l
- 878463.f2/CMA_simulations/Model_2_inhk0
- 878463.f2/CMA_simulations/myparams.mod
- 878463.f2/CMA_simulations/occupancy_mc_v2.f90
- 878463.f2/CMA_simulations/Occ_MC_v2.exe
- 878463.f2/CMA_simulations/rannum.f
- 878463.f2/CMA_simulations/with_CH3_1.cif
- 878463.f2/CMA_simulations/with_CH3_1.mol2
- 878463.f2/CMA_simulations/with_CH3_1.qxyz
- 878463.f2/CMA_simulations/with_CH3_1.zmat
- 878463.f2/CMA_simulations/with_CH3_2.cif
- 878463.f2/CMA_simulations/with_CH3_2.mol2
- 878463.f2/CMA_simulations/with_CH3_2.qxyz
- 878463.f2/CMA_simulations/with_CH3_2.zmat
- 878463.f2/progs/
- 878463.f2/progs/bin2gray.exe
- 878463.f2/progs/COPYRIGHT.txt
- 878463.f2/progs/DISCLAIMER.txt
- 878463.f2/progs/DZMC.exe
- 878463.f2/progs/make_random_occ.exe
- 878463.f2/progs/README.1ST
- 878463.f2/progs/zmat_maker.exe
- 878463.f2/progs/ZMC.exe
- 878463.f2/progs/zmc_documentation.txt
- 878463.f2/progs/ZMC_source/
- 878463.f2/progs/ZMC_source/array_functions.f90
- 878463.f2/progs/ZMC_source/bin2gray.f90
- 878463.f2/progs/ZMC_source/bin2gray_win32.f90
- 878463.f2/progs/ZMC_source/binary.f90
- 878463.f2/progs/ZMC_source/binary_io.f90
- 878463.f2/progs/ZMC_source/cartesian_class.f90
- 878463.f2/progs/ZMC_source/catmol2.f90
- 878463.f2/progs/ZMC_source/chkmol2.f90
- 878463.f2/progs/ZMC_source/cmdline_arguments.f90
- 878463.f2/progs/ZMC_source/compile_all.bat
- 878463.f2/progs/ZMC_source/compile_all_Linux.sh
- 878463.f2/progs/ZMC_source/compile_all_Mac.sh
- 878463.f2/progs/ZMC_source/COPYRIGHT.txt
- 878463.f2/progs/ZMC_source/crystallography_class.f90
- 878463.f2/progs/ZMC_source/diffuse_allocatable_March20_2014.f90
- 878463.f2/progs/ZMC_source/DISCLAIMER.txt
- 878463.f2/progs/ZMC_source/doc/
- 878463.f2/progs/ZMC_source/doc/ZMC_handbook_incomplete.pdf
- 878463.f2/progs/ZMC_source/file_functions.f90
- 878463.f2/progs/ZMC_source/fundamental_constants.f90
- 878463.f2/progs/ZMC_source/globals.f90
- 878463.f2/progs/ZMC_source/hash_table.f90
- 878463.f2/progs/ZMC_source/image_transforms.f90
- 878463.f2/progs/ZMC_source/keyword_class.f90
- 878463.f2/progs/ZMC_source/make_random_occ.f90
- 878463.f2/progs/ZMC_source/mar_class.f90
- 878463.f2/progs/ZMC_source/mol2chk.f90
- 878463.f2/progs/ZMC_source/mol2fixer.f90
- 878463.f2/progs/ZMC_source/mol2xyz.f90
- 878463.f2/progs/ZMC_source/mol2_class.f90
- 878463.f2/progs/ZMC_source/ni2pgm.f90
- 878463.f2/progs/ZMC_source/pgm2mask.f90
- 878463.f2/progs/ZMC_source/pgm2ni.f90
- 878463.f2/progs/ZMC_source/pgmave.f90
- 878463.f2/progs/ZMC_source/pgmcombine.f90
- 878463.f2/progs/ZMC_source/pnm_class.f90
- 878463.f2/progs/ZMC_source/polysample.f90
- 878463.f2/progs/ZMC_source/precision.f90
- 878463.f2/progs/ZMC_source/ps_routines.f
- 878463.f2/progs/ZMC_source/quaternion_class.f90
- 878463.f2/progs/ZMC_source/rannum.f
- 878463.f2/progs/ZMC_source/raw2pgm.f90
- 878463.f2/progs/ZMC_source/readat_zmc_April20_2011.f90
- 878463.f2/progs/ZMC_source/README.1ST
- 878463.f2/progs/ZMC_source/README.NOW
- 878463.f2/progs/ZMC_source/rotmatrix_class.f90
- 878463.f2/progs/ZMC_source/Simple_Simn/
- 878463.f2/progs/ZMC_source/Simple_Simn/cur.txt
- 878463.f2/progs/ZMC_source/Simple_Simn/diffuse.0kl
- 878463.f2/progs/ZMC_source/Simple_Simn/diffuse.h0l
- 878463.f2/progs/ZMC_source/Simple_Simn/diffuse.hk0
- 878463.f2/progs/ZMC_source/Simple_Simn/hk0_Test1
- 878463.f2/progs/ZMC_source/Simple_Simn/hk0_Test1.pgm
- 878463.f2/progs/ZMC_source/Simple_Simn/MC_keywords.inp
- 878463.f2/progs/ZMC_source/Simple_Simn/reordered_1e.qxyz
- 878463.f2/progs/ZMC_source/Simple_Simn/reordered_1e.zmat
- 878463.f2/progs/ZMC_source/Simple_Simn/terephthalic_contacts_2.contacts
- 878463.f2/progs/ZMC_source/Simple_Simn/Test1.diffuse
- 878463.f2/progs/ZMC_source/sort_functions.f90
- 878463.f2/progs/ZMC_source/statistics.f90
- 878463.f2/progs/ZMC_source/string_functions.f90
- 878463.f2/progs/ZMC_source/superimpose.f90
- 878463.f2/progs/ZMC_source/variable_array.f90
- 878463.f2/progs/ZMC_source/varying_string.f90
- 878463.f2/progs/ZMC_source/vector_class.f90
- 878463.f2/progs/ZMC_source/zmat2mol2.f90
- 878463.f2/progs/ZMC_source/zmat2xyz.f90
- 878463.f2/progs/ZMC_source/zmatchk.f90
- 878463.f2/progs/ZMC_source/zmatrix_class.f90
- 878463.f2/progs/ZMC_source/zmat_anim.f90
- 878463.f2/progs/ZMC_source/zmat_fit.f90
- 878463.f2/progs/ZMC_source/zmat_maker.f90
- 878463.f2/progs/ZMC_source/zmat_manip.f90
- 878463.f2/progs/ZMC_source/zmat_rotate.f90
- 878463.f2/progs/ZMC_source/zmc_documentation.txt
- 878463.f2/progs/ZMC_source/zmc_March20_2014.f90
- 878463.f2/README.txt
