# Supplementary material for: A Process for Modelling Diffuse Scattering from Disordered Molecular Crystals, Illustrated by Application to Monoclinic 9-Chloro-10-methylanthracene
Source: Hindawi journal article supplement (doi:10.1155/2015/878463), 2015-01-01
Supplement: f2 [file 878463.f2.zip › 878463.f2/CMA_simulations/Building_the_model.aux]

\relax 
\@writefile{toc}{\contentsline {section}{\numberline {1}CIF files}{1}}
\@writefile{toc}{\contentsline {section}{\numberline {2}Fill the unit cell}{2}}
\@writefile{toc}{\contentsline {section}{\numberline {3}Z-matrices}{2}}
\@writefile{toc}{\contentsline {section}{\numberline {4}Set up initial Short-Range Order (or Not)}{2}}
\@writefile{toc}{\contentsline {section}{\numberline {5}Contact vectors (interatomic interactions) \\ Part 1}{4}}
\@writefile{toc}{\contentsline {section}{\numberline {6}Sort the contacts}{4}}
\@writefile{toc}{\contentsline {section}{\numberline {7}Continue sorting the contacts}{5}}
\@writefile{toc}{\contentsline {section}{\numberline {8}Calculate the force constants on the contact vectors}{6}}
\@writefile{toc}{\contentsline {section}{\numberline {9}Run a model of CMA}{7}}
\@writefile{toc}{\contentsline {section}{\numberline {10}View the Calculated Diffraction}{8}}
\@writefile{toc}{\contentsline {section}{\numberline {11}Occupancy Correlations}{9}}
\@writefile{toc}{\contentsline {section}{\numberline {12}The `final' model (which is not final)}{9}}
