# Supplementary material for: A Process for Modelling Diffuse Scattering from Disordered Molecular Crystals, Illustrated by Application to Monoclinic 9-Chloro-10-methylanthracene
Source: Hindawi journal article supplement (doi:10.1155/2015/878463), 2015-01-01
Supplement: f2 [file 878463.f2.zip › 878463.f2/CMA_simulations/Building_the_model.log]

This is pdfTeX, Version 3.14159265-2.6-1.40.15 (TeX Live 2014/Cygwin) (preloaded format=latex 2015.2.17)  8 APR 2015 10:34
entering extended mode
 restricted \write18 enabled.
 %&-line parsing enabled.
**Building_the_model.tex
(./Building_the_model.tex
LaTeX2e <2014/05/01>
Babel <3.9k> and hyphenation patterns for 78 languages loaded.
(/usr/share/texmf-dist/tex/latex/base/article.cls
Document Class: article 2007/10/19 v1.4h Standard LaTeX document class
(/usr/share/texmf-dist/tex/latex/base/size10.clo
File: size10.clo 2007/10/19 v1.4h Standard LaTeX file (size option)
)
\c@part=\count79
\c@section=\count80
\c@subsection=\count81
\c@subsubsection=\count82
\c@paragraph=\count83
\c@subparagraph=\count84
\c@figure=\count85
\c@table=\count86
\abovecaptionskip=\skip41
\belowcaptionskip=\skip42
\bibindent=\dimen102
) (./Building_the_model.aux)
\openout1 = `Building_the_model.aux'.

LaTeX Font Info:    Checking defaults for OML/cmm/m/it on input line 13.
LaTeX Font Info:    ... okay on input line 13.
LaTeX Font Info:    Checking defaults for T1/cmr/m/n on input line 13.
LaTeX Font Info:    ... okay on input line 13.
LaTeX Font Info:    Checking defaults for OT1/cmr/m/n on input line 13.
LaTeX Font Info:    ... okay on input line 13.
LaTeX Font Info:    Checking defaults for OMS/cmsy/m/n on input line 13.
LaTeX Font Info:    ... okay on input line 13.
LaTeX Font Info:    Checking defaults for OMX/cmex/m/n on input line 13.
LaTeX Font Info:    ... okay on input line 13.
LaTeX Font Info:    Checking defaults for U/cmr/m/n on input line 13.
LaTeX Font Info:    ... okay on input line 13.
LaTeX Font Info:    External font `cmex10' loaded for size
(Font)              <12> on input line 15.
LaTeX Font Info:    External font `cmex10' loaded for size
(Font)              <8> on input line 15.
LaTeX Font Info:    External font `cmex10' loaded for size
(Font)              <6> on input line 15.
LaTeX Font Info:    External font `cmex10' loaded for size
(Font)              <5> on input line 15.

Overfull \hbox (16.36176pt too wide) in paragraph at lines 17--25
\OT1/cmr/m/n/10 cess of set-ting up a Monte Carlo model of Mon-o-clinic 9-Chlor
o-10-methylanthracene,
 []

LaTeX Font Info:    External font `cmex10' loaded for size
(Font)              <7> on input line 35.
LaTeX Font Info:    Try loading font information for OMS+cmr on input line 51.
(/usr/share/texmf-dist/tex/latex/base/omscmr.fd
File: omscmr.fd 1999/05/25 v2.5h Standard LaTeX font definitions
)
LaTeX Font Info:    Font shape `OMS/cmr/m/n' in size <10> not available
(Font)              Font shape `OMS/cmsy/m/n' tried instead on input line 51.
 [1

]
Overfull \hbox (1.55266pt too wide) in paragraph at lines 61--66
\OT1/cmr/m/n/10 ([]\OT1/cmtt/m/n/10 http://www.ccdc.cam.ac.uk/Solutions/CSDSyst
em/Pages/Mercury.aspx\OT1/cmr/m/n/10 ).
 []

[2] [3]
Overfull \hbox (122.24593pt too wide) in paragraph at lines 180--180
[]\OT1/cmtt/m/n/10 CONTATOMS ZMAT 1 2 3 4 5 6 7 8 9 10 11 12 13 14 15 16 17 18 
19 20 21 22 23 24 25 26 27 28[] 
 []


Overfull \hbox (122.24593pt too wide) in paragraph at lines 180--180
[]\OT1/cmtt/m/n/10 CONTATOMS ZMAT 2 2 3 4 5 6 7 8 9 10 11 12 13 14 15 16 17 18 
19 20 21 22 23 24 25 26 27 28[] 
 []

[4]
Overfull \hbox (13.22098pt too wide) in paragraph at lines 246--251
[]\OT1/cmr/m/n/10 Note also that as-pects of the CMA prob-lem are hard-coded in
to []\OT1/cmtt/m/n/10 classify_v2.f\OT1/cmr/m/n/10 ,
 []

[5] [6] [7] [8]
Overfull \hbox (16.60246pt too wide) in paragraph at lines 458--465
\OT1/cmr/m/n/10 Met-al-lur-gi-cal and Ma-te-ri-als Trans-ac-tions A, \OT1/cmr/b
x/n/10 42A\OT1/cmr/m/n/10 :23-31, 2010. DOI:10.1007/s11661-
 []

[9] [10] (./Building_the_model.aux) ) 
Here is how much of TeX's memory you used:
 257 strings out of 493118
 2915 string characters out of 6141230
 57906 words of memory out of 5000000
 3790 multiletter control sequences out of 15000+600000
 8407 words of font info for 30 fonts, out of 8000000 for 9000
 1141 hyphenation exceptions out of 8191
 29i,11n,19p,512b,292s stack positions out of 5000i,500n,10000p,200000b,80000s

Output written on Building_the_model.dvi (10 pages, 25420 bytes).
