# Supplementary material for: A Process for Modelling Diffuse Scattering from Disordered Molecular Crystals, Illustrated by Application to Monoclinic 9-Chloro-10-methylanthracene
Source: Hindawi journal article supplement (doi:10.1155/2015/878463), 2015-01-01
Supplement: f2 [file 878463.f2.zip › 878463.f2/CMA_simulations/Building_the_model.tex.bak]

\documentclass{article}      

                            
\title{Constructing the CMA Simulation Step by Step} 
\author{D. J. Goossens\footnote{darren.goossens@gmail.com}}
\date{\today}     

\newcommand{\cmd}[1]{\textsf{#1}}
\newcommand{\ZMC}{\texttt{ZMC}}


\begin{document}             

\maketitle                  

\section*{Introduction} This document was begun Wed, Mar 25, 2015 11:35:20 AM
to describe the process of setting up a Monte Carlo model of Monoclinic
9-Chloro-10-methylanthracene, and forms part of the deposited material
accompanying the publication `A Process for Modelling Diffuse Scattering from
Disordered Molecular Crystals, Illustrated by Application to Monoclinic
9-Chloro-10-methylanthracene' by Darren Goossens. To be used in conjunction
with [1] and [2], and with the paper in \emph{Advances in Condensed Matter
Physics} to which this deposited material is attached.

This process was undertaken running the \ZMC\ suite of code under cygwin
(\verb|http://cygwin.com|) on Windows.  The suite can also be used on Linux
(its native environment) and Mac OS X, and is available as source code, mostly
compiling with g95 (\verb|www.g95.org|).


\section{CIF files}

As a first step, I constructed the .cif files of the +1 and -1 CMA molecules,
where $\pm 1$ are the two states the molecules can be in, Cl or CH$_3$ on the
-9- and -10- disordered sites.

The files were derived from versions in the Cambridge Structural Database, and
modified to describe the two possible configurations, one with CH$_3$ on the
-9- atomic position in CMA and one with Cl on the -9- atomic position.

These \verb|.cif| files are: 

\verb|with_CH3_1.cif| 

\verb|with_CH3_2.cif|

The construction was done by hand, editing the downloaded files in a text
editor.  The main changes to the as-downloaded file(s) were to:
\begin{itemize}
\item Put a dummy
atom at the centre of the central ring, to act as an origin (not really necessary) and
as a single-atom represetnation of the whole molecule for the calculation of
occupancy contact vectors (see below).  
\item Copy the file and in the copy swap the CH$_3$ and Cl groups on one molecule to make the other configuration.
\end{itemize}


\section{Fill the unit cell}

The CIFs were in turn (one by one), imported into Mercury \\
(\verb|http://www.ccdc.cam.ac.uk/Solutions/CSDSystem/Pages/Mercury.aspx|). I
selected \cmd{Calculate}\ and \cmd{Packing/Slicing}\ and packed out the unit
cell. In this case $Z=4$.  I then saved each resulting structure to a separate
mol2 file:

\verb|with_CH3_1.mol2| 

\verb|with_CH3_2.mol2|

\section{Z-matrices}

Used \cmd{zmat\_maker}\ to construct z-matrices and (external) z-matrix
coordinates for each molecule type [1].  Running \cmd{zmat\_maker}\ outputted a
z-matrix (\verb|.zmat| file) and the quaternions and origin atom translations
(\verb|.qxyz| file) needed to place the molecule into a unit cell.  In this
case, these files are:

\verb|with_CH3_1.qxyz|

\verb|with_CH3_1.zmat|

\verb|with_CH3_2.qxyz|

\verb|with_CH3_2.zmat|


Note that command line commands were like (`\$' is the command prompt):
\begin{verbatim}
$ zmat_maker.exe with_CH3_1.mol2
\end{verbatim}
Note also that
\begin{verbatim}
$ zmat_maker.exe --help
\end{verbatim}
may be useful.  Asking for help like this is worth a try with most of the commands used here.

\section{Set up initial Short-Range Order (or Not)}

I began with a random occupancy structure with the correct global average but
no correlation structure.  To do this I used \cmd{make\_random\_occ}\ to set up
an initial random occupancy structure (`occupancy structure' refers to the
arrangement of the type~1 and type~2 molecules, which in this case are really
just flips of each other).  This occupancy structure was taken from [3-6].
Reference [6] was particularly useful (see its figures 4 and 6).  Since the
orientations and positions generated by \cmd{zmat\_maker}\ were the same for
both species (which made sense, given that the two CIF files were made by
exchanging the CH$_3$ and Cl and leaving all other atoms fixed, rather than by
flipping the whole molecule over), it was possible to get the ratios correct by
putting 0.686 of type~1 and 0.314 of type~2 on each site.  This  ensured that
the `Cl rich' sites were always where the 1s are in figure 4 of [6].  This then
meant that when the occupancy MC was done the  average molecular site occupancy
could be maintained by ensuring that occpancies were swapped only \emph{within}
a given molecular site (i.e., the the occupancy of a molecule on the first
position in a unit cell was only ever swapped with the occpancy of a molecule
in the first position of some other cell, for example).

Here is the \cmd{make\_random\_occ}\ session:
\begin{verbatim}
$ make_random_occ.exe 
 How big is the model crystal? (asize bsize csize)
32 32 32 
 How many locations in the unit cell?
4
 How many types of zmatrix in the structure?
2
How many instances of zmatrix   1 on location   1
1
How many instances of zmatrix   2 on location   1
1
How many instances of zmatrix   1 on location   2
1
How many instances of zmatrix   2 on location   2
1
How many instances of zmatrix   1 on location   3
1
How many instances of zmatrix   2 on location   3
1
How many instances of zmatrix   1 on location   4
1
How many instances of zmatrix   2 on location   4
1
What is the probability of getting instance   1
of zmatrix   1 on location   1
0.686
What is the probability of getting instance   1
of zmatrix   2 on location   1
0.314
What is the probability of getting instance   1
of zmatrix   1 on location   2
0.686
What is the probability of getting instance   1
of zmatrix   2 on location   2
0.314
What is the probability of getting instance   1
of zmatrix   1 on location   3
0.686
What is the probability of getting instance   1
of zmatrix   2 on location   3
0.314
What is the probability of getting instance   1
of zmatrix   1 on location   4
0.686
What is the probability of getting instance   1
of zmatrix   2 on location   4
0.314
 What is output filename?
CMA_initial_random_occ.txt
 Done.
\end{verbatim}

\section{Contact vectors (interatomic interactions) \\ Part 1}

The next step was to set up an input file for \ZMC\ to generate the contact list.  This file is shown in
\verb|Gen_contacts.inp|

Here are the last few fields:
\begin{verbatim}
NEWCONTACTS CMA_set9_contacts
VMIN 1.0
VMAX 7.0
CONTATOMS ZMAT 1 2 3 4 5 6 7 8 9 10 11 12 13 14 15 16 17 18 19 20 21 22 23 24 25 26 27 28
CONTATOMS ZMAT 2 2 3 4 5 6 7 8 9 10 11 12 13 14 15 16 17 18 19 20 21 22 23 24 25 26 27 28
\end{verbatim}
These lines tell \ZMC\ to look for contacts involving z-matrices 1
and 2 and atoms 2--28, with contact lengths of between 1.0\AA\ and 7.0\AA.

To run it:
\begin{verbatim}
$ ZMC --getcontacts Gen_contacts.inp > Gen_contacts.screen_output
\end{verbatim}
Where \verb|Gen_contacts.screen_output| just captures the screen dump
of the program and the results are in \verb|CMA_contacts_initial|, which is
referred to in the input file, \verb|Gen_contacts.inp|.

\section{Sort the contacts}

  This can be done any number of ways.  In this case, it was a two step
process.  First, the list (\verb|CMA_contacts_initial|) was imported into Excel,
then sorted on (see the header line of the contact file for symbols): (1)
Length (2) oz (`\textbf{o}rigin \textbf{z}-matrix', basically the type of
z-matrix that the contact is coming `from') (3) dz ( `\textbf{d}estination
\textbf{z}-matrix', basically the type of z-matrix that the contact is going
`to') The result was stored in \verb|CMA_contacts_excel_sort|.

\section{Continue sorting the contacts}

  In this case, I wanted to give contacts which were symmetry-related (ie, the
same contact) the same type number.  For this, I wrote a bit of code called
\cmd{Classify}, with the source code in \verb|classify_v2.f|.
Compiling was just:
\begin{verbatim}
$ gfortran.exe -o Classify_v2 classify_v2.f 
\end{verbatim}
Then running:
\begin{verbatim}
$ ./Classify_v2.exe 
 Classify
 Assumes contacts are already sorted into
 ascending order by length, and within that
 that they have been sorted by oz and within
 that by dz.  Assumes om=dm=1 always !!!!
 This is for CMA mono only!!!
 Feb 2015
 What is increment? 4 for disorder, 1 for no disorder.
4
 Infile?
CMA_contacts_excel_sort
 Outfile?
CMA_contacts_grouped   
 Reading CMA_contacts_excel_sort to CMA_contacts_grouped
 How many rows?
49332
       49332  rows.

 Header is...
 ol	oz	om	oat	da	db	dc	dl	dz	dm	dat	length	type                                                      
\end{verbatim}
And output was to \verb|CMA_contacts_grouped|.  

What the program does is fairly crude.  It looks at the length of the contact
and at what types of molecules it connects.  For a given length, the contact
could connect molecules 1 to 1, 1 to 2, 2 to 2 or 2 to 1.   Note that 2-2 and
1-1 (and 1-2 and 2-1) are not necessarily equivalent, given that molecules can
have low symmetry.  Hence all four possibilities are given different types.  If
size-effect is being implemented, it may make sense for the size effects on
these four types to be related, and to consider these four types together as a
single type with four variations.

Note also that aspects of the CMA problem are hard-coded into
\verb|classify_v2.f|, and that while it should act as a template for further
studies, it may not be directly applicable.  In particular, the
\verb|classify_v2.f| program \emph{assumes} the spreadsheet sort noted in the
previous section was performed \emph{exactly} as specified!

\section{Calculate the force constants on the contact vectors}

 This was done following the formula developed in [7], which uses an
exponential form and the van der Waals radii of interacting atoms to determine
a force constant.  This work was undertaken primarily by Eric Chan, and the
program to calculate the force constants has a name that reflects this.

Compile:
\begin{verbatim}
$ gfortran.exe -o Eric_Chan_springs eric_trim_disorder.f 
\end{verbatim}
Run:
\begin{verbatim}
$ ./Eric_Chan_springs.exe 
 Assumes contacts are already classified as per
 classify_v2.f, i.e.:
 ascending order by length, and within that that
 that they have been sorted by oz and within
 that by dz.  Assumes om=dm=1 always !!!!
 This is for CMA mono only!!!
 Feb 2015, Darren Goossens.
 Infile?
CMA_contacts_grouped
 Outfile? (sprcons written here)
CMA_force_const_Chan
 Outfile? (trimmmed contacts written here)
CMA_contacts_grouped_trimmed
 Reading CMA_contacts_grouped, writing to CMA_force_const_Chan
 How many rows?
49332
       49332  rows.

 Header is...
  ol	oz	om	oat	da	db	dc	dl	dz	dm	dat	length	type                                                     
\end{verbatim}
This then resulted in a trimmed list of contacts and their force constants. A lot of
the generated contacts proved to have zero force constants (i.e., be too long to
worry about).  Compare the length of the two contact lists:
\begin{verbatim}
$ wc CMA_contacts_grouped_trimmed
  4769  61997 224197 CMA_contacts_grouped_trimmed

$ wc CMA_contacts_grouped
  49333  641329 2516034 CMA_contacts_grouped
\end{verbatim}
So before trimming there were 49333 lines in the file (top line is header, so
49332 contacts).  Afterwards, only 4766 contacts.  Note that trimming was done
by working backwards through the file and eliminating all the contacts
\emph{after} the last one with a non-zero spring constant.  That meant that
contacts shorter than the last non-zero one but which \emph{were} zero remained
in the model.  A further improvement would be to remove them and then renumber
what is left.  This would speed things up a bit but is not needed for
demonstration purposes.  Also, note that if the parameters that determine the
force constants are themselves to be refined (see [7]), then the trimming would
also need to be repeated each cycle of refinement.

\section{Run a model of CMA}

The first model (`Model ~1')used random occupancies (no chemical SRO --- that
is, no correlations amongst the molecule flips apart from the fact that the two
species are not randonly 50:50 distributed but more like 70:30).  It was run,
and then  its Fourier transform was calculated to look at the diffuse
scattering.

An input file to \ZMC\ was set up -- \verb|Model_1.inp| -- which used random
occupancies but many MC cycles to give an indication of the thermal diffuse
scattering.  The results were fed into \cmd{DZMC}, which also reads in an input
file as used by \cmd{DIFFUSE}\ to define the calculation regions.  These files
are included in this archive  and are called \verb|diffuse.monoXYZ| where
\verb|XYZ| = \verb|0kl|, \verb|hk0| or \verb|h0l|.  Other cuts can be
specified.  Note also that the \verb|diffuse.monoXYZ| files can be modfied to use different scattering factors (absorption edges, neutrons\ldots), to subtract the single body average  (Bragg) scattering in a number of ways (`Y' does a calculation based on average atomic positions and atomic displacement parameters, `e' does an exact calculation using 5\% of the model, `E' does an exact calculkation using the whole model.  Similar options are available in DISCUS [8].

Scattering factors were taken from 

\verb|http://it.iucr.org/Cb/ch6o1v0001/sec6o1o1/?#sec6o1o1o4|

and the file

\verb|diffuse.mono0kl|

is fairly self-documenting.

The simulation was controlled by two things, the input file \verb|Model_1.inp|,
and the \ZMC\ command line. 

Invoke \ZMC\ as
\begin{verbatim}
$ZMC --help2 --help
\end{verbatim}
for some help.  It is useful to direct the output to a file for easy reference.
\begin{verbatim}
$ZMC --help2 --help  > ZMC.help
\end{verbatim}
The `Trimmed' list of contacts written to \verb|CMA_force_const_Chan| was
pasted into the input file, \verb|Model_1.inp|.  Only the section above the
word `Untrimmed' was pasted in, and not including the word `Trimmed'....

The small batch job (shell script) \verb|Model_1.sh| is a convenient way to run
the calculation.  If you have multiple cores, you might want to put ampersands
on the ends of the commands that run the \cmd{DZMC}\ jobs to let them all run
at once, for example.

The command was (might be different in a Windows command prompt):
\begin{verbatim}
$ nohup bash Model_1.sh > Model_1.screen &
\end{verbatim}
And this was folled by much waiting.

\section{View the Calculated Diffraction}

\cmd{DZMC}\ uses as its engine \cmd{DIFFUSE}, which outputs binary files. The
toolbox program \cmd{bin2gray}\ converts these to \verb|pgm| files, which can
be viewed using any number of programs; a very useful tool is ImageJ.  The
binary file names were given in the files \verb|Model_1_in???| and were:
\begin{verbatim}
Model_1_hk0
Model_1_0kl
Model_1_h0l
\end{verbatim}
Note that
\begin{verbatim}
$ bin2gray --help
\end{verbatim}
may be useful.  Then
\begin{verbatim}
$ bin2gray --hmirror --vmirror --twofold Model_1_0kl Model_1_hk0
\end{verbatim}
and
\begin{verbatim}
$ bin2gray --twofold  Model_1_h0l
\end{verbatim}
(the $h0l$ layer does not have mirror planes due to the monoclinic structure).
This resulted in three files:
\begin{verbatim}
Model_1_hk0.pgm
Model_1_0kl.pgm
Model_1_h0l.pgm
\end{verbatim}
Which were viewed and compared to the observations.

Files with `Bragg' in the title do not subtract out the average structure from
the diffraction calculation.  This leaves the Bragg peaks in, and leaves in any
associated high-frequency ripples that result from having these bright features
in the pattern. If these calcualtions are then thresholded and/or scaled to
remove the ripples, it can be useful for comparison with observed data to
combine the Bragg spots with the calulated diffuse to get an image that looks
more like the observations.

\section{Occupancy Correlations}

To do occupancy correlations, the first thing was to develop a list of
interactions for use with the Ising-like potentials.  \ZMC\ could be used for
this, with only the origin (dummy) atom being used in the calculation.  The
input file was
\begin{verbatim}
Gen_occ_contacts.inp
\end{verbatim}
so the command was
\begin{verbatim}
$ZMC --getcontacts Gen_occ_contacts.inp
\end{verbatim}
and the results were written to  \verb|CMA_occ_contacts_initial|.

This file `only' has 96 lines in it, and since it was being used to establish
the occupancy structure (the array of 1 and 2 giving molecule orientation) the
oz, om, dz, dm fields were all irrelevant, and duplicates were culled.  It was then sorted and classified quickly using a spreadsheet to give
\begin{verbatim}
CMA_occ_contacts_sorted
\end{verbatim}
This file described the same interactions as noted in figure 1 of [3], where
there the interactions are denoted $a$,$b$,$c$,$d$ and are eqivalent to 1,2,4,3
(respectively) in the file \verb|CMA_occ_contacts_sorted| Hence, based on the
correlations used in [3], these four interactions need to induce occupancy
correlations of 0.4, 0.2, 0.05 and 0.0.

The program to do this was called \verb|occupancy_mc_v2.f90| and was compiled thus:
\begin{verbatim}
gfortran.exe -o Occ_MC_v2 occupancy_mc_v2.f90 rannum.f 
\end{verbatim}
\noindent where \verb|rannum.f| is a random number generation routine borrowed from
somewhere or other.  The Occupancy simulation can be run interactively, but it
was simpler and better for record keeping to put the inputs into a file and
redirect the input/output, giving this command:
\begin{verbatim}
$ ./Occ_MC_v2.exe < MC_occ.inp > MC_occ_Epstein.screen
\end{verbatim}
which took the input from  \verb|MC_occ.inp|, generated correlations as
suggested by [3], then dumped the screen output to  \verb|MC_occ_Epstein.screen|
and the actual new occupancy structure to  \verb|CMA_occ_correlations_Epstein|.

\section{The `final' model (which is not final)}

So the next step was to put the new correlation structure into the input file
for \ZMC\ and run again.  
\begin{verbatim} 
$ nohup bash Model_2.sh > Model_2.screen & 
\end{verbatim} 
which  produced images in the same way as
before.  Clearly at this stage a model existed.  It could now be modified,
extended, tested more thoroughly, and so forth, to gain the actual structural
insight that was desired.  Once the diffraction pattern of the model crystal
agrees with that of the real crystal, the pattern and the model can be explored
to find out about the structures present.

\section*{References}

\noindent [1]  D. J. Goossens, A. P. Heerdegen, E. J. Chan, and T. R. Welberry.
``Monte Carlo Modelling of Diffuse Scattering from Single Crystals: The Program
\ZMC.'' Metallurgical and Materials Transactions A, \textbf{42A}:23-31, 2010.
DOI:10.1007/s11661-010-0199-1.

\noindent [2] \verb|http://rsc.anu.edu.au/~goossens|

\noindent [3] J. Epstein, T. R. Welberry, and R. D. G. Jones.  ``Analysis of
the diffuse x-ray scattering from substitutionally disordered molecular
crystals: Monoclinic 9-bromo-10-methylanthracene.''  Acta Crystallographica,
\textbf{38}:611-618, 1982.

\noindent [4] R. D. G. Jones and T. R. Welberry. ``Crystals exhibiting disorder
- the monoclinic polymorph of 9-chloro-10-methylanthracene.'' Acta
Crystallographica Section B, \textbf{37}(5):1125-1126, May 1981,
doi:10.1107/S0567740881005232.

\noindent [5] R. D. G. Jones and T. R. Welberry. ``Crystals exhibiting disorder
- the monoclinic polymorph of 9-bromo-10-methylanthracene.'' Acta
Crystallographica Section B, \textbf{36}(4):852-857, Apr 1980,
doi:10.1107/S0567740880004682.

\noindent [6] T. R. Welberry and R. D. G. Jones.  Journal of Applied
Crystallography, \textbf{13}:244-251, 1980.

\noindent [7] E. J. Chan, T. R. Welberry, D. J. Goossens, and A. P. Heerdegen.
J. Appl.  Cryst., \textbf{43}:913-915, 2010, doi:10.1107/S0021889810022260

\noindent [8] R.~B. Neder and Th. Proffen.
Diffuse Scattering and Defect Structure Simulations: A cook book
  using the program DISCUS. OUP, 2008.
\end{document}  
