# Supplementary material for: A Process for Modelling Diffuse Scattering from Disordered Molecular Crystals, Illustrated by Application to Monoclinic 9-Chloro-10-methylanthracene
Source: Hindawi journal article supplement (doi:10.1155/2015/878463), 2015-01-01
Supplement: f2 [file 878463.f2.zip › 878463.f2/CMA_simulations/Building_the_model.tex.dic]

personal_ws-1.1 en 76 
Outfile
cygwin
bsize
qxyz
estination
vmirror
Neder
CIFs
ZMC
trimmmed
Cryst
CMA
der
da
wc
zmatrix
Proffen
monoXYZ
exe
dl
dm
txt
filename
pgm
sprcons
quaternions
chloro
Chloro
gray
VMAX
polymorph
const
XYZ
ie
gfortran
hk
Heerdegen
csize
monoclinic
Monoclinic
Acta
zmat
Waals
Ising
getcontacts
asize
Crystallographica
NEWCONTACTS
interatomic
Infile
thresholded
mc
occupancies
VMIN
Goossens
bromo
occ
Appl
methylanthracene
nohup
OUP
ol
inp
Welberry
ImageJ
hmirror
mol
rigin
rannum
substitutionally
DZMC
eric
dat
CIF
cif
CONTATOMS
