# Supplementary material for: A Process for Modelling Diffuse Scattering from Disordered Molecular Crystals, Illustrated by Application to Monoclinic 9-Chloro-10-methylanthracene
Source: Hindawi journal article supplement (doi:10.1155/2015/878463), 2015-01-01
Supplement: f2 [file 878463.f2.zip › 878463.f2/CMA_simulations/classify_v2.f]

       program classify

       implicit none
       
       character*100 :: infile,outfile,header
       integer ::  ol,oz,om,oat,da,db,dc,dl,dz,dm,dat
       integer ::  rows,newtype,i,dummy,oldtype,increment
       real    :: newlength,oldlength,thresh

       thresh = 0.005

       write(6,*)'Classify'
       write(6,*)'Assumes contacts are already sorted into'
       write(6,*)'ascending order by length, and within that that'
       write(6,*)'that they have been sorted by oz and within'
       write(6,*)'that by dz.  Assumes om=dm=1 always !!!!'
       write(6,*)'This is for CMA mono only!!!'
       write(6,*)'Darren Goossens'
       write(6,*)'Feb 2015'

1111   write(6,*)'What is increment? 4 for disorder, 1 for no disorder.'
       read(5,*) increment
       if((increment.ne.1).and.(increment.ne.4))goto 1111


       write(6,*)'Infile?'
       read(5,*)infile
       write(6,*)'Outfile?'
       read(5,*)outfile
       write(6,*)'Reading ',trim(infile),' to ',trim(outfile)
       write(6,*)'How many rows?' 
       read(5,*)rows
c! This bit is just for the CMA mono initial tests
       if(rows.lt.0)rows=6000
       write(6,*)rows,' rows.'
       open(unit=1,file=infile) 
       open(unit=2,file=outfile) 
       read(1,'(a100)')header
       write(6,*)
       write(6,*)'Header is...'
       write(6,*)header
       write(2,*)header
             oldtype= 1 - increment
             oldlength = -2.0
          do i = 1,rows
             read(1,*)ol,oz,om,oat,da,db,dc,dl,dz,dm,dat,
     &         newlength,dummy
               if(abs(newlength-oldlength).gt.thresh)then
                     oldtype=oldtype+increment
                     oldlength=newlength
               end if
                     newtype = -9999
               if((oz.eq.1).and.(dz.eq.1))newtype = oldtype        
               if((oz.eq.1).and.(dz.eq.2))newtype = oldtype + 1
               if((oz.eq.2).and.(dz.eq.1))newtype = oldtype + 2
               if((oz.eq.2).and.(dz.eq.2))newtype = oldtype + 3
               if(newtype.eq.-9999)then
                 write(6,*)'Something is odd with newtype.'
                 stop
               end if

c!             write(6,'(11i3,x,f8.4,2i8)')ol,oz,om,oat,da,db,dc,dl,dz,dm,
c!    &              dat,newlength,dummy,newtype
             write(2,'(11i3,x,f8.4,2i8)')ol,oz,om,oat,da,db,dc,dl,dz,dm,
     &              dat,newlength,newtype
             
          end do
       close(2)
       close(1)
       stop

       end program 
