# Supplementary material for: A Process for Modelling Diffuse Scattering from Disordered Molecular Crystals, Illustrated by Application to Monoclinic 9-Chloro-10-methylanthracene
Source: Hindawi journal article supplement (doi:10.1155/2015/878463), 2015-01-01
Supplement: f2 [file 878463.f2.zip › 878463.f2/CMA_simulations/CMA_contacts_excel_sort]

ol	oz	om	oat	da	db	dc	dl	dz	dm	dat	length	type
4	1	1	24	0	0	0	1	2	1	27	2.28262	42055
1	2	1	27	0	0	0	4	1	1	24	2.28262	11872
1	2	1	27	0	0	0	4	2	1	24	2.28262	11886
2	2	1	27	0	0	1	3	2	1	24	2.28262	24425
3	2	1	24	0	0	-1	2	2	1	27	2.28262	36080
4	2	1	24	0	0	0	1	2	1	27	2.28262	48222
1	1	1	24	0	0	1	4	2	1	27	2.28263	5058
3	1	1	24	0	0	-1	2	2	1	27	2.28263	29913
2	2	1	27	0	0	1	3	1	1	24	2.28263	24411
4	2	1	27	0	0	-1	1	1	1	24	2.28263	48877
1	2	1	24	0	0	1	4	2	1	27	2.28263	11225
4	2	1	27	0	0	-1	1	2	1	24	2.28263	48891
2	1	1	24	0	0	0	3	2	1	27	2.28264	17582
3	2	1	27	0	0	0	2	1	1	24	2.28264	36750
2	2	1	24	0	0	0	3	2	1	27	2.28264	23749
3	2	1	27	0	0	0	2	2	1	24	2.28264	36764
1	1	1	28	1	0	1	3	2	1	26	2.2964	6170
3	2	1	26	-1	0	-1	1	1	1	28	2.2964	36381
4	2	1	26	1	-1	0	2	1	1	28	2.2964	48705
2	1	1	28	-1	1	0	4	2	1	26	2.29641	18365
3	1	1	28	-1	0	-1	1	2	1	26	2.29641	30645
1	2	1	26	1	0	1	3	1	1	28	2.29641	11785
4	1	1	28	1	-1	0	2	2	1	26	2.29642	43118
2	2	1	26	-1	1	0	4	1	1	28	2.29642	24137
4	1	1	22	2	-1	0	2	2	1	22	2.38236	41739
2	2	1	22	-2	1	0	4	1	1	22	2.38236	23058
1	1	1	22	2	0	1	3	1	1	22	2.38237	4740
2	1	1	22	-2	1	0	4	1	1	22	2.38237	16891
3	1	1	22	-2	0	-1	1	1	1	22	2.38237	29209
4	1	1	22	2	-1	0	2	1	1	22	2.38237	41724
1	1	1	22	2	0	1	3	2	1	22	2.38237	4755
3	1	1	22	-2	0	-1	1	2	1	22	2.38237	29224
1	2	1	22	2	0	1	3	1	1	22	2.38237	10907
3	2	1	22	-2	0	-1	1	1	1	22	2.38237	35376
1	2	1	22	2	0	1	3	2	1	22	2.38237	10922
3	2	1	22	-2	0	-1	1	2	1	22	2.38237	35391
2	1	1	22	-2	1	0	4	2	1	22	2.38238	16906
4	2	1	22	2	-1	0	2	1	1	22	2.38238	47891
2	2	1	22	-2	1	0	4	2	1	22	2.38238	23073
4	2	1	22	2	-1	0	2	2	1	22	2.38238	47906
1	1	1	23	2	0	1	3	2	1	26	2.42453	5002
2	1	1	23	-2	1	0	4	2	1	26	2.42453	17148
3	1	1	23	-2	0	-1	1	2	1	26	2.42453	29451
1	2	1	26	2	0	1	3	1	1	23	2.42453	11844
3	2	1	26	-2	0	-1	1	1	1	23	2.42453	36317
4	2	1	26	2	-1	0	2	1	1	23	2.42453	48835
1	2	1	23	2	0	1	3	2	1	26	2.42453	11169
2	2	1	23	-2	1	0	4	2	1	26	2.42453	23315
3	2	1	26	-2	0	-1	1	2	1	23	2.42453	36329
4	2	1	26	2	-1	0	2	2	1	23	2.42453	48847
4	1	1	23	2	-1	0	2	2	1	26	2.42454	41971
2	2	1	26	-2	1	0	4	1	1	23	2.42454	23992
1	2	1	26	2	0	1	3	2	1	23	2.42454	11856
3	2	1	23	-2	0	-1	1	2	1	26	2.42454	35618
2	2	1	26	-2	1	0	4	2	1	23	2.42455	24004
4	2	1	23	2	-1	0	2	2	1	26	2.42455	48138
2	1	1	24	-1	0	0	3	1	1	17	2.50249	17431
3	1	1	17	1	0	0	2	1	1	24	2.50249	28239
3	1	1	24	-1	0	-1	2	2	1	17	2.50249	29767
2	2	1	17	1	0	1	3	1	1	24	2.50249	22107
1	1	1	24	1	0	1	4	1	1	17	2.5025	5200
2	1	1	17	1	0	1	3	1	1	24	2.5025	15933
3	1	1	24	-1	0	-1	2	1	1	17	2.5025	29752
4	1	1	17	-1	0	-1	1	1	1	24	2.5025	40387
1	1	1	24	1	0	1	4	2	1	17	2.5025	5215
2	1	1	17	1	0	1	3	2	1	24	2.5025	15947
2	1	1	24	-1	0	0	3	2	1	17	2.5025	17446
3	1	1	17	1	0	0	2	2	1	24	2.5025	28253
2	2	1	24	-1	0	0	3	1	1	17	2.5025	23598
3	2	1	17	1	0	0	2	1	1	24	2.5025	34413
3	2	1	24	-1	0	-1	2	1	1	17	2.5025	35919
4	2	1	17	-1	0	-1	1	1	1	24	2.5025	46561
1	2	1	24	1	0	1	4	2	1	17	2.5025	11382
2	2	1	17	1	0	1	3	2	1	24	2.5025	22121
2	2	1	24	-1	0	0	3	2	1	17	2.5025	23613
3	2	1	17	1	0	0	2	2	1	24	2.5025	34427
3	2	1	24	-1	0	-1	2	2	1	17	2.5025	35934
4	2	1	17	-1	0	-1	1	2	1	24	2.5025	46575
1	1	1	17	-1	0	0	4	1	1	24	2.50251	3415
4	1	1	24	1	0	0	1	1	1	17	2.50251	42111
4	1	1	17	-1	0	-1	1	2	1	24	2.50251	40401
4	1	1	24	1	0	0	1	2	1	17	2.50251	42126
1	2	1	17	-1	0	0	4	1	1	24	2.50251	9589
1	2	1	24	1	0	1	4	1	1	17	2.50251	11367
1	1	1	17	-1	0	0	4	2	1	24	2.50252	3429
4	2	1	24	1	0	0	1	1	1	17	2.50252	48278
1	2	1	17	-1	0	0	4	2	1	24	2.50252	9603
4	2	1	24	1	0	0	1	2	1	17	2.50252	48293
3	1	1	17	0	0	0	4	1	1	26	2.51192	28181
4	1	1	26	0	0	0	3	1	1	17	2.51192	42610
4	1	1	26	0	0	0	3	2	1	17	2.51192	42623
3	2	1	17	0	0	0	4	1	1	26	2.51192	34355
1	1	1	26	0	-1	0	2	1	1	17	2.51193	5542
2	1	1	17	0	1	0	1	1	1	26	2.51193	15845
3	1	1	26	0	1	0	4	2	1	17	2.51193	30316
4	2	1	17	0	-1	0	3	1	1	26	2.51193	46653
1	1	1	17	0	0	0	2	1	1	26	2.51194	3477
2	1	1	26	0	0	0	1	1	1	17	2.51194	17899
3	1	1	26	0	1	0	4	1	1	17	2.51194	30303
4	1	1	17	0	-1	0	3	1	1	26	2.51194	40479
1	1	1	26	0	-1	0	2	2	1	17	2.51194	5555
2	1	1	26	0	0	0	1	2	1	17	2.51194	17912
1	2	1	17	0	0	0	2	1	1	26	2.51194	9651
2	2	1	17	0	1	0	1	1	1	26	2.51194	22019
1	1	1	18	0	0	0	2	1	1	26	2.60278	3677
2	1	1	26	0	0	0	1	1	1	18	2.60278	17900
3	1	1	18	0	0	0	4	1	1	26	2.60278	28474
4	1	1	26	0	0	0	3	1	1	18	2.60278	42611
1	1	1	26	0	-1	0	2	2	1	18	2.60278	5556
2	1	1	26	0	0	0	1	2	1	18	2.60278	17913
1	2	1	18	0	0	0	2	1	1	26	2.60278	9851
2	2	1	18	0	1	0	1	1	1	26	2.60278	22271
1	1	1	26	0	-1	0	2	1	1	18	2.60279	5543
2	1	1	18	0	1	0	1	1	1	26	2.60279	16097
3	1	1	26	0	1	0	4	2	1	18	2.60279	30317
4	1	1	26	0	0	0	3	2	1	18	2.60279	42624
3	2	1	18	0	0	0	4	1	1	26	2.60279	34648
4	2	1	18	0	-1	0	3	1	1	26	2.60279	46892
3	1	1	26	0	1	0	4	1	1	18	2.6028	30304
4	1	1	18	0	-1	0	3	1	1	26	2.6028	40718
1	1	1	17	-1	0	0	1	2	1	27	2.60623	3403
2	1	1	17	1	0	0	2	2	1	27	2.60623	15921
1	2	1	27	1	0	0	1	1	1	17	2.60623	11929
2	2	1	27	-1	0	0	2	1	1	17	2.60623	24272
1	2	1	17	-1	0	0	1	2	1	27	2.60623	9577
1	2	1	27	1	0	0	1	2	1	17	2.60623	11946
2	2	1	17	1	0	0	2	2	1	27	2.60623	22095
2	2	1	27	-1	0	0	2	2	1	17	2.60623	24289
4	2	1	17	-1	0	0	4	2	1	27	2.60624	46609
4	2	1	27	1	0	0	4	2	1	17	2.60624	49053
3	1	1	17	1	0	0	3	2	1	27	2.60625	28287
3	2	1	27	-1	0	0	3	1	1	17	2.60625	36640
3	2	1	17	1	0	0	3	2	1	27	2.60625	34461
3	2	1	27	-1	0	0	3	2	1	17	2.60625	36657
4	1	1	17	-1	0	0	4	2	1	27	2.60626	40435
4	2	1	27	1	0	0	4	1	1	17	2.60626	49036
3	1	1	17	0	0	0	4	1	1	27	2.63364	28182
4	1	1	27	0	0	0	3	1	1	17	2.63364	42811
3	1	1	27	0	1	0	4	2	1	17	2.63364	30564
4	2	1	17	0	-1	0	3	1	1	27	2.63364	46654
1	1	1	17	0	0	0	2	1	1	27	2.63365	3478
1	1	1	27	0	-1	0	2	1	1	17	2.63365	5779
2	1	1	17	0	1	0	1	1	1	27	2.63365	15846
2	1	1	27	0	0	0	1	1	1	17	2.63365	18169
3	1	1	27	0	1	0	4	1	1	17	2.63365	30553
4	1	1	17	0	-1	0	3	1	1	27	2.63365	40480
1	1	1	27	0	-1	0	2	2	1	17	2.63365	5790
2	1	1	27	0	0	0	1	2	1	17	2.63365	18180
4	1	1	27	0	0	0	3	2	1	17	2.63365	42822
1	2	1	17	0	0	0	2	1	1	27	2.63365	9652
2	2	1	17	0	1	0	1	1	1	27	2.63365	22020
3	2	1	17	0	0	0	4	1	1	27	2.63365	34356
2	1	1	24	-1	0	0	4	1	1	27	2.65608	17468
4	1	1	27	1	0	0	2	1	1	24	2.65608	42885
1	1	1	24	1	-1	1	3	1	1	27	2.65609	5116
1	1	1	27	1	-1	1	3	1	1	24	2.65609	5896
3	1	1	24	-1	1	-1	1	1	1	27	2.65609	29807
3	1	1	27	-1	1	-1	1	1	1	24	2.65609	30418
1	1	1	27	1	-1	1	3	2	1	24	2.65609	5914
3	1	1	27	-1	1	-1	1	2	1	24	2.65609	30436
4	1	1	27	1	0	0	2	2	1	24	2.65609	42903
1	2	1	24	1	-1	1	3	1	1	27	2.65609	11283
2	2	1	24	-1	0	0	4	1	1	27	2.65609	23635
3	2	1	24	-1	1	-1	1	1	1	27	2.65609	35974
2	1	1	27	-1	0	0	4	1	1	24	2.65611	18097
4	1	1	24	1	0	0	2	1	1	27	2.65611	42148
2	1	1	27	-1	0	0	4	2	1	24	2.65611	18115
4	2	1	24	1	0	0	2	1	1	27	2.65611	48315
2	1	1	23	-1	0	0	2	1	1	28	2.67482	17184
2	1	1	28	1	0	0	2	1	1	23	2.67482	18475
3	1	1	23	-1	0	0	3	1	1	28	2.67483	29584
3	1	1	28	1	0	0	3	1	1	23	2.67483	30822
1	1	1	23	1	0	0	1	1	1	28	2.67484	4849
1	1	1	28	-1	0	0	1	1	1	23	2.67484	5955
1	1	1	28	-1	0	0	1	2	1	23	2.67484	5967
2	1	1	28	1	0	0	2	2	1	23	2.67484	18487
1	2	1	23	1	0	0	1	1	1	28	2.67484	11016
2	2	1	23	-1	0	0	2	1	1	28	2.67484	23351
3	1	1	28	1	0	0	3	2	1	23	2.67485	30834
3	2	1	23	-1	0	0	3	1	1	28	2.67485	35751
4	1	1	23	1	0	0	4	1	1	28	2.67486	41931
4	1	1	28	-1	0	0	4	1	1	23	2.67486	42968
4	1	1	28	-1	0	0	4	2	1	23	2.67486	42980
4	2	1	23	1	0	0	4	1	1	28	2.67486	48098
1	1	1	23	1	0	1	4	1	1	17	2.67725	4923
2	1	1	23	-1	0	0	3	1	1	17	2.67725	17210
3	1	1	17	1	0	0	2	1	1	23	2.67725	28238
4	1	1	17	-1	0	-1	1	1	1	23	2.67725	40386
2	1	1	23	-1	0	0	3	2	1	17	2.67725	17227
4	1	1	17	-1	0	-1	1	2	1	23	2.67725	40400
1	2	1	23	1	0	1	4	1	1	17	2.67725	11090
3	2	1	17	1	0	0	2	1	1	23	2.67725	34412
1	1	1	17	-1	0	0	4	2	1	23	2.67726	3428
3	1	1	17	1	0	0	2	2	1	23	2.67726	28252
3	1	1	23	-1	0	-1	2	2	1	17	2.67726	29559
2	2	1	17	1	0	1	3	1	1	23	2.67726	22106
2	2	1	23	-1	0	0	3	1	1	17	2.67726	23377
4	2	1	23	1	0	0	1	1	1	17	2.67726	48025
1	2	1	17	-1	0	0	4	2	1	23	2.67726	9602
2	2	1	17	1	0	1	3	2	1	23	2.67726	22120
2	2	1	23	-1	0	0	3	2	1	17	2.67726	23394
3	2	1	17	1	0	0	2	2	1	23	2.67726	34426
3	2	1	23	-1	0	-1	2	2	1	17	2.67726	35726
4	2	1	23	1	0	0	1	2	1	17	2.67726	48042
1	1	1	17	-1	0	0	4	1	1	23	2.67727	3414
2	1	1	17	1	0	1	3	1	1	23	2.67727	15932
3	1	1	23	-1	0	-1	2	1	1	17	2.67727	29542
4	1	1	23	1	0	0	1	1	1	17	2.67727	41858
1	1	1	23	1	0	1	4	2	1	17	2.67727	4940
2	1	1	17	1	0	1	3	2	1	23	2.67727	15946
4	1	1	23	1	0	0	1	2	1	17	2.67727	41875
1	2	1	17	-1	0	0	4	1	1	23	2.67727	9588
3	2	1	23	-1	0	-1	2	1	1	17	2.67727	35709
4	2	1	17	-1	0	-1	1	1	1	23	2.67727	46560
1	2	1	23	1	0	1	4	2	1	17	2.67727	11107
4	2	1	17	-1	0	-1	1	2	1	23	2.67727	46574
1	1	1	28	1	0	1	3	2	1	28	2.6877	6172
2	1	1	28	-1	1	0	4	2	1	28	2.6877	18367
3	2	1	28	-1	0	-1	1	1	1	28	2.6877	36827
4	2	1	28	1	-1	0	2	1	1	28	2.6877	49187
3	1	1	28	-1	0	-1	1	2	1	28	2.68772	30647
1	2	1	28	1	0	1	3	1	1	28	2.68772	12272
4	1	1	28	1	-1	0	2	2	1	28	2.68773	43120
2	2	1	28	-1	1	0	4	1	1	28	2.68773	24584
1	1	1	9	1	-1	0	2	1	1	19	2.78161	1677
2	1	1	19	-1	1	0	1	1	1	9	2.78161	16247
3	1	1	9	-1	1	0	4	1	1	19	2.78161	26320
3	1	1	19	-1	0	0	4	1	1	9	2.78161	28610
4	1	1	9	1	0	0	3	1	1	19	2.78161	38752
4	1	1	19	1	-1	0	3	1	1	9	2.78161	40996
2	1	1	19	-1	1	0	1	2	1	9	2.78161	16274
3	1	1	9	-1	1	0	4	2	1	19	2.78161	26334
4	1	1	9	1	0	0	3	2	1	19	2.78161	38766
4	1	1	19	1	-1	0	3	2	1	9	2.78161	41023
1	2	1	9	1	-1	0	2	1	1	19	2.78161	7851
3	2	1	9	-1	1	0	4	1	1	19	2.78161	32494
3	2	1	19	-1	0	0	4	1	1	9	2.78161	34784
4	2	1	19	1	-1	0	3	1	1	9	2.78161	47170
3	2	1	9	-1	1	0	4	2	1	19	2.78161	32508
4	2	1	19	1	-1	0	3	2	1	9	2.78161	47197
1	1	1	19	1	0	0	2	1	1	9	2.78162	3980
2	1	1	9	-1	0	0	1	1	1	19	2.78162	13906
1	1	1	9	1	-1	0	2	2	1	19	2.78162	1691
1	1	1	19	1	0	0	2	2	1	9	2.78162	4007
2	1	1	9	-1	0	0	1	2	1	19	2.78162	13920
3	1	1	19	-1	0	0	4	2	1	9	2.78162	28637
1	2	1	19	1	0	0	2	1	1	9	2.78162	10154
2	2	1	9	-1	0	0	1	1	1	19	2.78162	20080
2	2	1	19	-1	1	0	1	1	1	9	2.78162	22421
4	2	1	9	1	0	0	3	1	1	19	2.78162	44926
1	2	1	9	1	-1	0	2	2	1	19	2.78162	7865
1	2	1	19	1	0	0	2	2	1	9	2.78162	10181
2	2	1	9	-1	0	0	1	2	1	19	2.78162	20094
2	2	1	19	-1	1	0	1	2	1	9	2.78162	22448
3	2	1	19	-1	0	0	4	2	1	9	2.78163	34811
4	2	1	9	1	0	0	3	2	1	19	2.78163	44940
3	1	1	14	0	0	0	2	2	1	25	2.83262	27548
2	2	1	25	0	0	0	3	1	1	14	2.83262	23917
1	1	1	14	0	0	0	4	1	1	25	2.83263	2764
1	1	1	25	0	0	1	4	1	1	14	2.83263	5297
2	1	1	25	0	0	0	3	1	1	14	2.83263	17750
3	1	1	14	0	0	0	2	1	1	25	2.83263	27533
4	1	1	14	0	0	-1	1	1	1	25	2.83263	39767
4	1	1	25	0	0	0	1	1	1	14	2.83263	42279
1	1	1	14	0	0	0	4	2	1	25	2.83263	2779
2	1	1	14	0	0	1	3	2	1	25	2.83263	15205
4	1	1	14	0	0	-1	1	2	1	25	2.83263	39782
4	1	1	25	0	0	0	1	2	1	14	2.83263	42301
1	2	1	14	0	0	0	4	1	1	25	2.83263	8938
1	2	1	25	0	0	1	4	1	1	14	2.83263	11464
3	2	1	25	0	0	-1	2	1	1	14	2.83263	36242
4	2	1	25	0	0	0	1	1	1	14	2.83263	48446
1	2	1	14	0	0	0	4	2	1	25	2.83263	8953
2	2	1	14	0	0	1	3	2	1	25	2.83263	21379
2	2	1	25	0	0	0	3	2	1	14	2.83263	23939
3	2	1	14	0	0	0	2	2	1	25	2.83263	33722
3	2	1	25	0	0	-1	2	2	1	14	2.83263	36264
4	2	1	25	0	0	0	1	2	1	14	2.83263	48468
2	1	1	14	0	0	1	3	1	1	25	2.83264	15190
3	1	1	25	0	0	-1	2	1	1	14	2.83264	30075
1	1	1	25	0	0	1	4	2	1	14	2.83264	5319
2	1	1	25	0	0	0	3	2	1	14	2.83264	17772
3	1	1	25	0	0	-1	2	2	1	14	2.83264	30097
2	2	1	14	0	0	1	3	1	1	25	2.83264	21364
3	2	1	14	0	0	0	2	1	1	25	2.83264	33707
4	2	1	14	0	0	-1	1	1	1	25	2.83264	45941
1	2	1	25	0	0	1	4	2	1	14	2.83264	11486
4	2	1	14	0	0	-1	1	2	1	25	2.83264	45956
1	1	1	16	-1	0	0	4	1	1	23	2.84238	3192
1	1	1	23	1	0	1	4	1	1	16	2.84238	4922
4	1	1	16	-1	0	-1	1	1	1	23	2.84238	40154
4	1	1	23	1	0	0	1	1	1	16	2.84238	41857
1	1	1	16	-1	0	0	4	2	1	23	2.84238	3202
2	1	1	23	-1	0	0	3	2	1	16	2.84238	17226
3	1	1	16	1	0	0	2	2	1	23	2.84238	27998
4	1	1	16	-1	0	-1	1	2	1	23	2.84238	40164
4	1	1	23	1	0	0	1	2	1	16	2.84238	41874
1	2	1	16	-1	0	0	4	1	1	23	2.84238	9366
1	2	1	23	1	0	1	4	1	1	16	2.84238	11089
2	2	1	23	-1	0	0	3	1	1	16	2.84238	23376
3	2	1	16	1	0	0	2	1	1	23	2.84238	34162
4	2	1	23	1	0	0	1	1	1	16	2.84238	48024
1	2	1	16	-1	0	0	4	2	1	23	2.84238	9376
2	2	1	23	-1	0	0	3	2	1	16	2.84238	23393
3	2	1	16	1	0	0	2	2	1	23	2.84238	34172
4	2	1	23	1	0	0	1	2	1	16	2.84238	48041
2	1	1	23	-1	0	0	3	1	1	16	2.84239	17209
3	1	1	16	1	0	0	2	1	1	23	2.84239	27988
1	1	1	23	1	0	1	4	2	1	16	2.84239	4939
2	1	1	16	1	0	1	3	2	1	23	2.84239	15702
3	2	1	23	-1	0	-1	2	1	1	16	2.84239	35708
4	2	1	16	-1	0	-1	1	1	1	23	2.84239	46328
1	2	1	23	1	0	1	4	2	1	16	2.84239	11106
2	2	1	16	1	0	1	3	2	1	23	2.84239	21876
3	2	1	23	-1	0	-1	2	2	1	16	2.84239	35725
4	2	1	16	-1	0	-1	1	2	1	23	2.84239	46338
2	1	1	16	1	0	1	3	1	1	23	2.84241	15692
3	1	1	23	-1	0	-1	2	1	1	16	2.84241	29541
3	1	1	23	-1	0	-1	2	2	1	16	2.84241	29558
2	2	1	16	1	0	1	3	1	1	23	2.84241	21866
1	1	1	8	1	-1	0	2	1	1	19	2.8689	1430
1	1	1	19	1	0	0	2	1	1	8	2.8689	3979
2	1	1	8	-1	0	0	1	1	1	19	2.8689	13698
2	1	1	19	-1	1	0	1	1	1	8	2.8689	16246
3	1	1	8	-1	1	0	4	1	1	19	2.8689	26134
3	1	1	19	-1	0	0	4	1	1	8	2.8689	28609
4	1	1	8	1	0	0	3	1	1	19	2.8689	38519
4	1	1	19	1	-1	0	3	1	1	8	2.8689	40995
2	1	1	8	-1	0	0	1	2	1	19	2.8689	13710
2	1	1	19	-1	1	0	1	2	1	8	2.8689	16273
3	1	1	8	-1	1	0	4	2	1	19	2.8689	26146
1	2	1	8	1	-1	0	2	1	1	19	2.8689	7604
1	2	1	19	1	0	0	2	1	1	8	2.8689	10153
4	2	1	19	1	-1	0	3	1	1	8	2.8689	47169
1	1	1	8	1	-1	0	2	2	1	19	2.86891	1442
1	1	1	19	1	0	0	2	2	1	8	2.86891	4006
3	1	1	19	-1	0	0	4	2	1	8	2.86891	28636
4	1	1	8	1	0	0	3	2	1	19	2.86891	38531
4	1	1	19	1	-1	0	3	2	1	8	2.86891	41022
2	2	1	8	-1	0	0	1	1	1	19	2.86891	19872
2	2	1	19	-1	1	0	1	1	1	8	2.86891	22420
3	2	1	8	-1	1	0	4	1	1	19	2.86891	32308
3	2	1	19	-1	0	0	4	1	1	8	2.86891	34783
4	2	1	8	1	0	0	3	1	1	19	2.86891	44693
1	2	1	8	1	-1	0	2	2	1	19	2.86891	7616
1	2	1	19	1	0	0	2	2	1	8	2.86891	10180
2	2	1	8	-1	0	0	1	2	1	19	2.86891	19884
2	2	1	19	-1	1	0	1	2	1	8	2.86891	22447
3	2	1	8	-1	1	0	4	2	1	19	2.86891	32320
4	2	1	19	1	-1	0	3	2	1	8	2.86891	47196
3	2	1	19	-1	0	0	4	2	1	8	2.86892	34810
4	2	1	8	1	0	0	3	2	1	19	2.86892	44705
1	1	1	25	1	0	1	3	2	1	28	2.88082	5460
3	2	1	28	-1	0	-1	1	1	1	25	2.88082	36824
1	2	1	25	1	0	1	3	2	1	28	2.88082	11627
2	2	1	25	-1	1	0	4	2	1	28	2.88082	23896
2	2	1	28	-1	1	0	4	2	1	25	2.88082	24604
3	2	1	28	-1	0	-1	1	2	1	25	2.88082	36847
4	2	1	25	1	-1	0	2	2	1	28	2.88082	48539
4	2	1	28	1	-1	0	2	2	1	25	2.88082	49207
2	1	1	25	-1	1	0	4	2	1	28	2.88083	17729
3	1	1	25	-1	0	-1	1	2	1	28	2.88083	29962
4	1	1	25	1	-1	0	2	2	1	28	2.88083	42372
1	2	1	28	1	0	1	3	1	1	25	2.88083	12269
2	2	1	28	-1	1	0	4	1	1	25	2.88083	24581
4	2	1	28	1	-1	0	2	1	1	25	2.88083	49184
1	2	1	28	1	0	1	3	2	1	25	2.88084	12292
3	2	1	25	-1	0	-1	1	2	1	28	2.88084	36129
1	1	1	18	1	0	0	2	1	1	4	2.89748	3780
2	1	1	4	-1	0	0	1	1	1	18	2.89748	12805
3	1	1	4	-1	1	0	4	1	1	18	2.89748	25280
4	1	1	18	1	-1	0	3	1	1	4	2.89748	40801
2	1	1	4	-1	0	0	1	2	1	18	2.89748	12816
3	1	1	4	-1	1	0	4	2	1	18	2.89748	25291
1	2	1	18	1	0	0	2	1	1	4	2.89748	9954
4	2	1	18	1	-1	0	3	1	1	4	2.89748	46975
1	1	1	4	1	-1	0	2	1	1	18	2.89749	469
2	1	1	18	-1	1	0	1	1	1	4	2.89749	15973
1	1	1	4	1	-1	0	2	2	1	18	2.89749	480
1	1	1	18	1	0	0	2	2	1	4	2.89749	3805
2	1	1	18	-1	1	0	1	2	1	4	2.89749	15998
3	1	1	18	-1	0	0	4	2	1	4	2.89749	28355
1	2	1	4	1	-1	0	2	1	1	18	2.89749	6643
2	2	1	4	-1	0	0	1	1	1	18	2.89749	18979
2	2	1	18	-1	1	0	1	1	1	4	2.89749	22147
4	2	1	4	1	0	0	3	1	1	18	2.89749	43753
1	2	1	4	1	-1	0	2	2	1	18	2.89749	6654
1	2	1	18	1	0	0	2	2	1	4	2.89749	9979
2	2	1	4	-1	0	0	1	2	1	18	2.89749	18990
2	2	1	18	-1	1	0	1	2	1	4	2.89749	22172
3	2	1	4	-1	1	0	4	2	1	18	2.89749	31465
3	2	1	18	-1	0	0	4	2	1	4	2.89749	34529
4	2	1	4	1	0	0	3	2	1	18	2.89749	43764
4	2	1	18	1	-1	0	3	2	1	4	2.89749	47000
3	1	1	18	-1	0	0	4	1	1	4	2.8975	28330
4	1	1	4	1	0	0	3	1	1	18	2.8975	37579
4	1	1	4	1	0	0	3	2	1	18	2.8975	37590
4	1	1	18	1	-1	0	3	2	1	4	2.8975	40826
3	2	1	4	-1	1	0	4	1	1	18	2.8975	31454
3	2	1	18	-1	0	0	4	1	1	4	2.8975	34504
4	1	1	11	1	0	0	3	2	1	28	2.94601	39244
3	2	1	28	-1	0	0	4	1	1	11	2.94601	36888
1	1	1	11	1	-1	0	2	2	1	28	2.94602	2170
2	2	1	28	-1	1	0	1	1	1	11	2.94602	24511
1	2	1	11	1	-1	0	2	2	1	28	2.94602	8344
2	2	1	28	-1	1	0	1	2	1	11	2.94602	24536
3	2	1	11	-1	1	0	4	2	1	28	2.94602	32945
4	2	1	28	1	-1	0	3	2	1	11	2.94602	49244
2	1	1	11	-1	0	0	1	2	1	28	2.94603	14363
3	1	1	11	-1	1	0	4	2	1	28	2.94603	26771
1	2	1	28	1	0	0	2	1	1	11	2.94603	12206
4	2	1	28	1	-1	0	3	1	1	11	2.94603	49219
1	2	1	28	1	0	0	2	2	1	11	2.94603	12231
2	2	1	11	-1	0	0	1	2	1	28	2.94603	20537
3	2	1	28	-1	0	0	4	2	1	11	2.94603	36913
4	2	1	11	1	0	0	3	2	1	28	2.94603	45418
4	1	1	13	0	0	-1	1	1	1	25	2.94719	39572
1	1	1	13	0	0	0	4	2	1	25	2.94719	2591
4	1	1	13	0	0	-1	1	2	1	25	2.94719	39589
1	2	1	25	0	0	1	4	1	1	13	2.94719	11463
4	2	1	25	0	0	0	1	1	1	13	2.94719	48445
1	2	1	13	0	0	0	4	2	1	25	2.94719	8765
4	2	1	25	0	0	0	1	2	1	13	2.94719	48467
1	1	1	13	0	0	0	4	1	1	25	2.9472	2574
1	1	1	25	0	0	1	4	1	1	13	2.9472	5296
2	1	1	25	0	0	0	3	1	1	13	2.9472	17749
3	1	1	13	0	0	0	2	1	1	25	2.9472	27289
4	1	1	25	0	0	0	1	1	1	13	2.9472	42278
2	1	1	13	0	0	1	3	2	1	25	2.9472	14962
3	1	1	13	0	0	0	2	2	1	25	2.9472	27306
4	1	1	25	0	0	0	1	2	1	13	2.9472	42300
1	2	1	13	0	0	0	4	1	1	25	2.9472	8748
2	2	1	25	0	0	0	3	1	1	13	2.9472	23916
3	2	1	25	0	0	-1	2	1	1	13	2.9472	36241
2	2	1	25	0	0	0	3	2	1	13	2.9472	23938
3	2	1	13	0	0	0	2	2	1	25	2.9472	33480
2	1	1	13	0	0	1	3	1	1	25	2.94721	14945
3	1	1	25	0	0	-1	2	1	1	13	2.94721	30074
1	1	1	25	0	0	1	4	2	1	13	2.94721	5318
2	1	1	25	0	0	0	3	2	1	13	2.94721	17771
3	1	1	25	0	0	-1	2	2	1	13	2.94721	30096
2	2	1	13	0	0	1	3	1	1	25	2.94721	21119
3	2	1	13	0	0	0	2	1	1	25	2.94721	33463
4	2	1	13	0	0	-1	1	1	1	25	2.94721	45746
1	2	1	25	0	0	1	4	2	1	13	2.94721	11485
2	2	1	13	0	0	1	3	2	1	25	2.94721	21136
3	2	1	25	0	0	-1	2	2	1	13	2.94721	36263
4	2	1	13	0	0	-1	1	2	1	25	2.94721	45763
2	1	1	6	-1	0	0	4	1	1	27	2.95397	13339
4	1	1	27	1	0	0	2	1	1	6	2.95397	42876
1	1	1	6	1	-1	1	3	1	1	27	2.95398	999
1	1	1	27	1	-1	1	3	1	1	6	2.95398	5887
3	1	1	6	-1	1	-1	1	1	1	27	2.95398	25697
3	1	1	27	-1	1	-1	1	1	1	6	2.95398	30409
1	1	1	27	1	-1	1	3	2	1	6	2.95398	5905
3	1	1	27	-1	1	-1	1	2	1	6	2.95398	30427
4	1	1	27	1	0	0	2	2	1	6	2.95398	42894
1	2	1	6	1	-1	1	3	1	1	27	2.95398	7173
2	2	1	6	-1	0	0	4	1	1	27	2.95398	19513
3	2	1	6	-1	1	-1	1	1	1	27	2.95398	31871
2	1	1	27	-1	0	0	4	1	1	6	2.95399	18088
4	1	1	6	1	0	0	2	1	1	27	2.95399	38048
2	1	1	27	-1	0	0	4	2	1	6	2.95399	18106
4	2	1	6	1	0	0	2	1	1	27	2.95399	44222
1	1	1	18	1	0	0	2	1	1	3	2.96124	3779
2	1	1	3	-1	0	0	1	1	1	18	2.96124	12574
3	1	1	3	-1	1	0	4	1	1	18	2.96124	25027
4	1	1	18	1	-1	0	3	1	1	3	2.96124	40800
2	1	1	3	-1	0	0	1	2	1	18	2.96124	12585
3	1	1	3	-1	1	0	4	2	1	18	2.96124	25038
1	2	1	18	1	0	0	2	1	1	3	2.96124	9953
4	2	1	18	1	-1	0	3	1	1	3	2.96124	46974
1	1	1	3	1	-1	0	2	1	1	18	2.96125	272
2	1	1	18	-1	1	0	1	1	1	3	2.96125	15972
3	1	1	18	-1	0	0	4	1	1	3	2.96125	28329
4	1	1	3	1	0	0	3	1	1	18	2.96125	37372
1	1	1	3	1	-1	0	2	2	1	18	2.96125	283
1	1	1	18	1	0	0	2	2	1	3	2.96125	3804
2	1	1	18	-1	1	0	1	2	1	3	2.96125	15997
3	1	1	18	-1	0	0	4	2	1	3	2.96125	28354
4	1	1	3	1	0	0	3	2	1	18	2.96125	37383
4	1	1	18	1	-1	0	3	2	1	3	2.96125	40825
1	2	1	3	1	-1	0	2	1	1	18	2.96125	6446
2	2	1	3	-1	0	0	1	1	1	18	2.96125	18748
2	2	1	18	-1	1	0	1	1	1	3	2.96125	22146
3	2	1	3	-1	1	0	4	1	1	18	2.96125	31201
3	2	1	18	-1	0	0	4	1	1	3	2.96125	34503
4	2	1	3	1	0	0	3	1	1	18	2.96125	43546
1	2	1	3	1	-1	0	2	2	1	18	2.96125	6457
1	2	1	18	1	0	0	2	2	1	3	2.96125	9978
2	2	1	3	-1	0	0	1	2	1	18	2.96125	18759
2	2	1	18	-1	1	0	1	2	1	3	2.96125	22171
3	2	1	3	-1	1	0	4	2	1	18	2.96125	31212
3	2	1	18	-1	0	0	4	2	1	3	2.96125	34528
4	2	1	3	1	0	0	3	2	1	18	2.96125	43557
4	2	1	18	1	-1	0	3	2	1	3	2.96125	46999
1	1	1	21	0	0	0	4	1	1	24	2.97148	4321
2	1	1	24	0	0	0	3	1	1	21	2.97148	17552
3	1	1	21	0	0	0	2	1	1	24	2.97148	29181
4	1	1	24	0	0	0	1	1	1	21	2.97148	42025
1	1	1	21	0	0	0	4	2	1	24	2.97148	4333
2	1	1	21	0	0	1	3	2	1	24	2.97148	16852
3	1	1	21	0	0	0	2	2	1	24	2.97148	29193
2	2	1	24	0	0	0	3	1	1	21	2.97148	23719
3	2	1	24	0	0	-1	2	1	1	21	2.97148	36050
4	2	1	24	0	0	0	1	1	1	21	2.97148	48192
2	1	1	21	0	0	1	3	1	1	24	2.97149	16840
3	1	1	24	0	0	-1	2	1	1	21	2.97149	29883
1	1	1	24	0	0	1	4	1	1	21	2.97151	5028
4	1	1	21	0	0	-1	1	1	1	24	2.97151	41328
4	1	1	21	0	0	-1	1	2	1	24	2.97151	41340
1	2	1	24	0	0	1	4	1	1	21	2.97151	11195
4	1	1	24	0	0	0	1	2	1	21	2.98692	42050
1	2	1	21	0	0	0	4	1	1	24	2.98692	10494
1	2	1	21	0	0	0	4	2	1	24	2.98692	10506
4	2	1	24	0	0	0	1	2	1	21	2.98692	48217
2	2	1	21	0	0	1	3	2	1	24	2.98693	23021
3	2	1	24	0	0	-1	2	2	1	21	2.98693	36075
1	1	1	24	0	0	1	4	2	1	21	2.98694	5053
2	1	1	24	0	0	0	3	2	1	21	2.98694	17577
3	1	1	24	0	0	-1	2	2	1	21	2.98694	29908
2	2	1	21	0	0	1	3	1	1	24	2.98694	23009
3	2	1	21	0	0	0	2	1	1	24	2.98694	35348
4	2	1	21	0	0	-1	1	1	1	24	2.98694	47499
1	2	1	24	0	0	1	4	2	1	21	2.98694	11220
2	2	1	24	0	0	0	3	2	1	21	2.98694	23744
3	2	1	21	0	0	0	2	2	1	24	2.98694	35360
4	2	1	21	0	0	-1	1	2	1	24	2.98694	47511
1	1	1	10	1	-1	0	2	2	1	28	3.00442	1915
4	1	1	10	1	0	0	3	2	1	28	3.00442	38999
1	2	1	28	1	0	0	2	1	1	10	3.00442	12205
2	2	1	28	-1	1	0	1	1	1	10	3.00442	24510
3	2	1	28	-1	0	0	4	1	1	10	3.00442	36887
1	2	1	10	1	-1	0	2	2	1	28	3.00442	8089
2	2	1	28	-1	1	0	1	2	1	10	3.00442	24535
2	1	1	10	-1	0	0	1	2	1	28	3.00443	14143
3	1	1	10	-1	1	0	4	2	1	28	3.00443	26566
4	2	1	28	1	-1	0	3	1	1	10	3.00443	49218
1	2	1	28	1	0	0	2	2	1	10	3.00443	12230
2	2	1	10	-1	0	0	1	2	1	28	3.00443	20317
3	2	1	10	-1	1	0	4	2	1	28	3.00443	32740
3	2	1	28	-1	0	0	4	2	1	10	3.00443	36912
4	2	1	10	1	0	0	3	2	1	28	3.00443	45173
4	2	1	28	1	-1	0	3	2	1	10	3.00443	49243
3	2	1	20	0	1	0	4	2	1	17	3.01211	35103
4	2	1	17	0	-1	0	3	2	1	20	3.01211	46670
2	1	1	17	0	1	0	1	2	1	20	3.01212	15862
3	1	1	17	0	0	0	4	2	1	20	3.01212	28198
4	1	1	17	0	-1	0	3	2	1	20	3.01212	40496
1	2	1	20	0	-1	0	2	1	1	17	3.01212	10314
3	2	1	20	0	1	0	4	1	1	17	3.01212	35093
4	2	1	20	0	0	0	3	1	1	17	3.01212	47377
1	2	1	20	0	-1	0	2	2	1	17	3.01212	10324
2	2	1	17	0	1	0	1	2	1	20	3.01212	22036
3	2	1	17	0	0	0	4	2	1	20	3.01212	34372
4	2	1	20	0	0	0	3	2	1	17	3.01212	47387
1	1	1	17	0	0	0	2	2	1	20	3.01213	3494
2	2	1	20	0	0	0	1	1	1	17	3.01213	22693
1	2	1	17	0	0	0	2	2	1	20	3.01213	9668
2	2	1	20	0	0	0	1	2	1	17	3.01213	22703
2	1	1	17	0	1	0	1	1	1	20	3.03968	15843
3	1	1	17	0	0	0	4	1	1	20	3.03968	28179
4	1	1	20	0	0	0	3	1	1	17	3.03968	41201
3	1	1	20	0	1	0	4	2	1	17	3.03968	28932
4	1	1	20	0	0	0	3	2	1	17	3.03968	41211
3	2	1	17	0	0	0	4	1	1	20	3.03968	34353
4	2	1	17	0	-1	0	3	1	1	20	3.03968	46651
1	1	1	17	0	0	0	2	1	1	20	3.03969	3475
1	1	1	20	0	-1	0	2	1	1	17	3.03969	4138
2	1	1	20	0	0	0	1	1	1	17	3.03969	16522
3	1	1	20	0	1	0	4	1	1	17	3.03969	28922
4	1	1	17	0	-1	0	3	1	1	20	3.03969	40477
1	1	1	20	0	-1	0	2	2	1	17	3.03969	4148
2	1	1	20	0	0	0	1	2	1	17	3.03969	16532
1	2	1	17	0	0	0	2	1	1	20	3.03969	9649
2	2	1	17	0	1	0	1	1	1	20	3.03969	22017
1	1	1	18	1	0	0	2	1	1	5	3.04064	3781
2	1	1	5	-1	0	0	1	1	1	18	3.04064	13044
3	1	1	5	-1	1	0	4	1	1	18	3.04064	25509
4	1	1	18	1	-1	0	3	1	1	5	3.04064	40802
2	1	1	5	-1	0	0	1	2	1	18	3.04064	13053
3	1	1	5	-1	1	0	4	2	1	18	3.04064	25518
1	2	1	18	1	0	0	2	1	1	5	3.04064	9955
4	2	1	18	1	-1	0	3	1	1	5	3.04064	46976
1	1	1	5	1	-1	0	2	1	1	18	3.04065	717
2	1	1	18	-1	1	0	1	1	1	5	3.04065	15974
1	1	1	5	1	-1	0	2	2	1	18	3.04065	726
1	1	1	18	1	0	0	2	2	1	5	3.04065	3806
2	1	1	18	-1	1	0	1	2	1	5	3.04065	15999
3	1	1	18	-1	0	0	4	2	1	5	3.04065	28356
4	1	1	18	1	-1	0	3	2	1	5	3.04065	40827
1	2	1	5	1	-1	0	2	1	1	18	3.04065	6891
2	2	1	5	-1	0	0	1	1	1	18	3.04065	19218
2	2	1	18	-1	1	0	1	1	1	5	3.04065	22148
3	2	1	5	-1	1	0	4	1	1	18	3.04065	31683
4	2	1	5	1	0	0	3	1	1	18	3.04065	43997
1	2	1	5	1	-1	0	2	2	1	18	3.04065	6900
1	2	1	18	1	0	0	2	2	1	5	3.04065	9980
2	2	1	5	-1	0	0	1	2	1	18	3.04065	19227
2	2	1	18	-1	1	0	1	2	1	5	3.04065	22173
3	2	1	5	-1	1	0	4	2	1	18	3.04065	31692
4	2	1	18	1	-1	0	3	2	1	5	3.04065	47001
3	1	1	18	-1	0	0	4	1	1	5	3.04066	28331
4	1	1	5	1	0	0	3	1	1	18	3.04066	37823
3	2	1	18	-1	0	0	4	2	1	5	3.04066	34530
4	2	1	5	1	0	0	3	2	1	18	3.04066	44006
4	1	1	5	1	0	0	3	2	1	18	3.04067	37832
3	2	1	18	-1	0	0	4	1	1	5	3.04067	34505
2	1	1	28	-1	1	0	4	1	1	21	3.05599	18345
4	1	1	21	1	-1	0	2	1	1	28	3.05599	41373
1	1	1	21	1	0	1	3	1	1	28	3.05601	4466
3	1	1	28	-1	0	-1	1	1	1	21	3.05601	30625
1	1	1	28	1	0	1	3	1	1	21	3.05602	6150
3	1	1	21	-1	0	-1	1	1	1	28	3.05602	29041
2	1	1	21	-1	1	0	4	1	1	28	3.05603	16804
4	1	1	28	1	-1	0	2	1	1	21	3.05603	43098
1	1	1	28	1	0	1	3	2	1	21	3.0573	6167
2	1	1	28	-1	1	0	4	2	1	21	3.0573	18362
3	2	1	21	-1	0	-1	1	1	1	28	3.0573	35212
4	2	1	21	1	-1	0	2	1	1	28	3.0573	47544
3	1	1	28	-1	0	-1	1	2	1	21	3.05731	30642
1	2	1	21	1	0	1	3	1	1	28	3.05731	10635
4	1	1	28	1	-1	0	2	2	1	21	3.05732	43115
2	2	1	21	-1	1	0	4	1	1	28	3.05732	22973
1	2	1	20	1	0	1	3	2	1	26	3.05732	10481
2	2	1	20	-1	1	0	4	2	1	26	3.05732	22680
3	2	1	26	-1	0	-1	1	2	1	20	3.05732	36399
4	2	1	26	1	-1	0	2	2	1	20	3.05732	48723
2	2	1	26	-1	1	0	4	2	1	20	3.05733	24155
4	2	1	20	1	-1	0	2	2	1	26	3.05733	47425
1	2	1	26	1	0	1	3	2	1	20	3.05735	11803
3	2	1	20	-1	0	-1	1	2	1	26	3.05735	34958
1	1	1	27	1	-1	0	2	2	1	27	3.05838	5877
2	2	1	27	-1	1	0	1	1	1	27	3.05838	24323
2	1	1	27	-1	0	0	1	2	1	27	3.05839	18080
3	1	1	27	-1	1	0	4	2	1	27	3.05839	30475
4	1	1	27	1	0	0	3	2	1	27	3.05839	42938
1	2	1	27	1	0	0	2	1	1	27	3.05839	11973
3	2	1	27	-1	0	0	4	1	1	27	3.05839	36684
4	2	1	27	1	-1	0	3	1	1	27	3.05839	48968
2	1	1	25	0	0	0	3	1	1	19	3.0632	17755
3	1	1	19	0	0	0	2	1	1	25	3.0632	28709
2	1	1	19	0	0	1	3	2	1	25	3.0632	16365
3	1	1	19	0	0	0	2	2	1	25	3.0632	28723
2	2	1	25	0	0	0	3	1	1	19	3.0632	23922
3	2	1	25	0	0	-1	2	1	1	19	3.0632	36247
2	2	1	19	0	0	1	3	2	1	25	3.0632	22539
3	2	1	25	0	0	-1	2	2	1	19	3.0632	36269
1	1	1	19	0	0	0	4	1	1	25	3.06321	3905
1	1	1	25	0	0	1	4	1	1	19	3.06321	5302
2	1	1	19	0	0	1	3	1	1	25	3.06321	16351
3	1	1	25	0	0	-1	2	1	1	19	3.06321	30080
4	1	1	19	0	0	-1	1	1	1	25	3.06321	40927
4	1	1	25	0	0	0	1	1	1	19	3.06321	42284
1	1	1	19	0	0	0	4	2	1	25	3.06321	3919
1	1	1	25	0	0	1	4	2	1	19	3.06321	5324
3	1	1	25	0	0	-1	2	2	1	19	3.06321	30102
4	1	1	19	0	0	-1	1	2	1	25	3.06321	40941
4	1	1	25	0	0	0	1	2	1	19	3.06321	42306
1	2	1	19	0	0	0	4	1	1	25	3.06321	10079
1	2	1	25	0	0	1	4	1	1	19	3.06321	11469
2	2	1	19	0	0	1	3	1	1	25	3.06321	22525
4	2	1	19	0	0	-1	1	1	1	25	3.06321	47101
4	2	1	25	0	0	0	1	1	1	19	3.06321	48451
1	2	1	19	0	0	0	4	2	1	25	3.06321	10093
1	2	1	25	0	0	1	4	2	1	19	3.06321	11491
4	2	1	19	0	0	-1	1	2	1	25	3.06321	47115
4	2	1	25	0	0	0	1	2	1	19	3.06321	48473
2	1	1	25	0	0	0	3	2	1	19	3.06322	17777
3	2	1	19	0	0	0	2	1	1	25	3.06322	34883
2	2	1	25	0	0	0	3	2	1	19	3.06322	23944
3	2	1	19	0	0	0	2	2	1	25	3.06322	34897
1	1	1	28	0	0	1	4	1	1	12	3.06492	6052
4	1	1	12	0	0	-1	1	1	1	28	3.06492	39353
2	1	1	28	0	0	0	3	1	1	12	3.06493	18394
3	1	1	12	0	0	0	2	1	1	28	3.06493	27037
2	1	1	28	0	0	0	3	2	1	12	3.06493	18413
3	2	1	12	0	0	0	2	1	1	28	3.06493	33211
1	1	1	12	0	0	0	4	1	1	28	3.06494	2367
4	1	1	28	0	0	0	1	1	1	12	3.06494	43022
1	1	1	28	0	0	1	4	2	1	12	3.06494	6071
4	1	1	28	0	0	0	1	2	1	12	3.06494	43041
1	2	1	12	0	0	0	4	1	1	28	3.06494	8541
4	2	1	12	0	0	-1	1	1	1	28	3.06494	45527
2	1	1	12	0	0	1	3	1	1	28	3.06495	14705
3	1	1	28	0	0	-1	2	1	1	12	3.06495	30733
3	1	1	28	0	0	-1	2	2	1	12	3.06495	30752
2	2	1	12	0	0	1	3	1	1	28	3.06495	20879
1	1	1	20	1	0	1	3	2	1	26	3.07181	4308
2	1	1	20	-1	1	0	4	2	1	26	3.07181	16509
3	2	1	26	-1	0	-1	1	1	1	20	3.07181	36373
4	2	1	26	1	-1	0	2	1	1	20	3.07181	48697
1	2	1	26	1	0	1	3	1	1	20	3.07182	11777
3	1	1	20	-1	0	-1	1	2	1	26	3.07183	28786
4	1	1	20	1	-1	0	2	2	1	26	3.07183	41251
2	2	1	26	-1	1	0	4	1	1	20	3.07183	24129
2	1	1	6	-1	0	0	3	1	1	17	3.07286	13307
3	1	1	17	1	0	0	2	1	1	6	3.07286	28233
1	1	1	6	1	0	1	4	1	1	17	3.07287	1087
4	1	1	17	-1	0	-1	1	1	1	6	3.07287	40381
1	1	1	6	1	0	1	4	2	1	17	3.07287	1101
2	1	1	6	-1	0	0	3	2	1	17	3.07287	13321
2	1	1	17	1	0	1	3	2	1	6	3.07287	15941
3	1	1	6	-1	0	-1	2	2	1	17	3.07287	25660
3	1	1	17	1	0	0	2	2	1	6	3.07287	28247
4	1	1	17	-1	0	-1	1	2	1	6	3.07287	40395
1	2	1	6	1	0	1	4	1	1	17	3.07287	7261
2	2	1	6	-1	0	0	3	1	1	17	3.07287	19481
2	2	1	17	1	0	1	3	1	1	6	3.07287	22101
3	2	1	6	-1	0	-1	2	1	1	17	3.07287	31820
3	2	1	17	1	0	0	2	1	1	6	3.07287	34407
4	2	1	17	-1	0	-1	1	1	1	6	3.07287	46555
1	2	1	6	1	0	1	4	2	1	17	3.07287	7275
2	2	1	6	-1	0	0	3	2	1	17	3.07287	19495
2	2	1	17	1	0	1	3	2	1	6	3.07287	22115
3	2	1	6	-1	0	-1	2	2	1	17	3.07287	31834
3	2	1	17	1	0	0	2	2	1	6	3.07287	34421
4	2	1	17	-1	0	-1	1	2	1	6	3.07287	46569
1	1	1	17	-1	0	0	4	1	1	6	3.07288	3409
2	1	1	17	1	0	1	3	1	1	6	3.07288	15927
3	1	1	6	-1	0	-1	2	1	1	17	3.07288	25646
4	1	1	6	1	0	0	1	1	1	17	3.07288	38016
1	1	1	17	-1	0	0	4	2	1	6	3.07288	3423
4	1	1	6	1	0	0	1	2	1	17	3.07288	38030
1	2	1	17	-1	0	0	4	1	1	6	3.07288	9583
4	2	1	6	1	0	0	1	1	1	17	3.07288	44190
1	2	1	17	-1	0	0	4	2	1	6	3.07288	9597
4	2	1	6	1	0	0	1	2	1	17	3.07288	44204
1	1	1	28	0	0	1	4	1	1	17	3.07351	6057
4	1	1	17	0	0	-1	1	1	1	28	3.07351	40510
2	1	1	28	0	0	0	3	2	1	17	3.07352	18418
3	2	1	17	0	0	0	2	1	1	28	3.07352	34328
1	1	1	17	0	0	0	4	1	1	28	3.07353	3524
2	1	1	28	0	0	0	3	1	1	17	3.07353	18399
3	1	1	17	0	0	0	2	1	1	28	3.07353	28154
4	1	1	28	0	0	0	1	1	1	17	3.07353	43027
1	1	1	28	0	0	1	4	2	1	17	3.07353	6076
4	1	1	28	0	0	0	1	2	1	17	3.07353	43046
1	2	1	17	0	0	0	4	1	1	28	3.07353	9698
4	2	1	17	0	0	-1	1	1	1	28	3.07353	46684
2	1	1	17	0	0	1	3	1	1	28	3.07354	15818
3	1	1	28	0	0	-1	2	1	1	17	3.07354	30738
3	1	1	28	0	0	-1	2	2	1	17	3.07354	30757
2	2	1	17	0	0	1	3	1	1	28	3.07354	21992
2	1	1	23	-2	1	0	4	1	1	21	3.0769	17133
4	1	1	21	2	-1	0	2	1	1	23	3.0769	41504
4	1	1	21	2	-1	0	2	2	1	23	3.0769	41515
2	2	1	23	-2	1	0	4	1	1	21	3.0769	23300
1	1	1	21	2	0	1	3	1	1	23	3.07691	4515
1	1	1	23	2	0	1	3	1	1	21	3.07691	4987
2	1	1	21	-2	1	0	4	1	1	23	3.07691	16663
3	1	1	21	-2	0	-1	1	1	1	23	3.07691	28986
3	1	1	23	-2	0	-1	1	1	1	21	3.07691	29436
4	1	1	23	2	-1	0	2	1	1	21	3.07691	41956
1	1	1	21	2	0	1	3	2	1	23	3.07692	4526
3	1	1	21	-2	0	-1	1	2	1	23	3.07692	28997
1	2	1	23	2	0	1	3	1	1	21	3.07692	11154
3	2	1	23	-2	0	-1	1	1	1	21	3.07692	35603
2	1	1	21	-2	1	0	4	2	1	23	3.07693	16674
4	2	1	23	2	-1	0	2	1	1	21	3.07693	48123
1	1	1	22	2	0	1	3	2	1	26	3.08348	4758
2	1	1	22	-2	1	0	4	2	1	26	3.08348	16909
4	1	1	22	2	-1	0	2	2	1	26	3.08348	41742
2	2	1	26	-2	1	0	4	1	1	22	3.08348	23991
3	2	1	26	-2	0	-1	1	1	1	22	3.08348	36316
4	2	1	26	2	-1	0	2	1	1	22	3.08348	48834
1	2	1	22	2	0	1	3	2	1	26	3.08348	10925
1	2	1	26	2	0	1	3	2	1	22	3.08348	11855
2	2	1	22	-2	1	0	4	2	1	26	3.08348	23076
2	2	1	26	-2	1	0	4	2	1	22	3.08348	24003
3	2	1	22	-2	0	-1	1	2	1	26	3.08348	35394
3	2	1	26	-2	0	-1	1	2	1	22	3.08348	36328
4	2	1	22	2	-1	0	2	2	1	26	3.08348	47909
4	2	1	26	2	-1	0	2	2	1	22	3.08348	48846
3	1	1	22	-2	0	-1	1	2	1	26	3.08349	29227
1	2	1	26	2	0	1	3	1	1	22	3.08349	11843
1	1	1	7	1	0	1	3	2	1	28	3.0911	1322
4	1	1	7	1	-1	0	2	2	1	28	3.0911	38248
2	2	1	28	-1	1	0	4	1	1	7	3.0911	24567
3	2	1	28	-1	0	-1	1	1	1	7	3.0911	36810
1	2	1	7	1	0	1	3	2	1	28	3.0911	7496
2	2	1	7	-1	1	0	4	2	1	28	3.0911	19781
2	2	1	28	-1	1	0	4	2	1	7	3.0911	24590
3	2	1	28	-1	0	-1	1	2	1	7	3.0911	36833
4	2	1	7	1	-1	0	2	2	1	28	3.0911	44422
4	2	1	28	1	-1	0	2	2	1	7	3.0911	49193
2	1	1	7	-1	1	0	4	2	1	28	3.09111	13607
3	1	1	7	-1	0	-1	1	2	1	28	3.09111	25854
1	2	1	28	1	0	1	3	1	1	7	3.09111	12255
4	2	1	28	1	-1	0	2	1	1	7	3.09111	49170
1	2	1	28	1	0	1	3	2	1	7	3.09111	12278
3	2	1	7	-1	0	-1	1	2	1	28	3.09111	32028
3	1	1	10	-1	1	0	4	1	1	19	3.09456	26547
3	1	1	19	-1	0	0	4	1	1	10	3.09456	28611
4	1	1	10	1	0	0	3	1	1	19	3.09456	38980
4	1	1	19	1	-1	0	3	1	1	10	3.09456	40997
4	1	1	10	1	0	0	3	2	1	19	3.09456	38994
4	1	1	19	1	-1	0	3	2	1	10	3.09456	41024
3	2	1	10	-1	1	0	4	1	1	19	3.09456	32721
3	2	1	19	-1	0	0	4	1	1	10	3.09456	34785
1	1	1	10	1	-1	0	2	1	1	19	3.09457	1896
1	1	1	19	1	0	0	2	1	1	10	3.09457	3981
2	1	1	10	-1	0	0	1	1	1	19	3.09457	14124
2	1	1	19	-1	1	0	1	1	1	10	3.09457	16248
1	1	1	10	1	-1	0	2	2	1	19	3.09457	1910
1	1	1	19	1	0	0	2	2	1	10	3.09457	4008
2	1	1	10	-1	0	0	1	2	1	19	3.09457	14138
2	1	1	19	-1	1	0	1	2	1	10	3.09457	16275
3	1	1	10	-1	1	0	4	2	1	19	3.09457	26561
1	2	1	10	1	-1	0	2	1	1	19	3.09457	8070
1	2	1	19	1	0	0	2	1	1	10	3.09457	10155
2	2	1	10	-1	0	0	1	1	1	19	3.09457	20298
2	2	1	19	-1	1	0	1	1	1	10	3.09457	22422
4	2	1	19	1	-1	0	3	1	1	10	3.09457	47171
1	2	1	10	1	-1	0	2	2	1	19	3.09457	8084
1	2	1	19	1	0	0	2	2	1	10	3.09457	10182
2	2	1	10	-1	0	0	1	2	1	19	3.09457	20312
2	2	1	19	-1	1	0	1	2	1	10	3.09457	22449
3	2	1	10	-1	1	0	4	2	1	19	3.09457	32735
3	2	1	19	-1	0	0	4	2	1	10	3.09457	34812
4	2	1	10	1	0	0	3	2	1	19	3.09457	45168
4	2	1	19	1	-1	0	3	2	1	10	3.09457	47198
3	1	1	19	-1	0	0	4	2	1	10	3.09458	28638
4	2	1	10	1	0	0	3	1	1	19	3.09458	45154
2	1	1	16	1	0	0	2	1	1	22	3.10399	15661
2	1	1	22	-1	0	0	2	1	1	16	3.10399	16940
2	1	1	22	-1	0	0	2	2	1	16	3.10399	16960
2	2	1	16	1	0	0	2	1	1	22	3.10399	21835
3	1	1	16	1	0	0	3	1	1	22	3.104	28014
3	1	1	22	-1	0	0	3	1	1	16	3.104	29335
2	1	1	16	1	0	0	2	2	1	22	3.104	15678
2	2	1	22	-1	0	0	2	1	1	16	3.104	23107
2	2	1	16	1	0	0	2	2	1	22	3.104	21852
2	2	1	22	-1	0	0	2	2	1	16	3.104	23127
1	1	1	16	-1	0	0	1	1	1	22	3.10401	3161
1	1	1	22	1	0	0	1	1	1	16	3.10401	4584
1	1	1	16	-1	0	0	1	2	1	22	3.10401	3178
1	1	1	22	1	0	0	1	2	1	16	3.10401	4604
3	1	1	22	-1	0	0	3	2	1	16	3.10401	29355
1	2	1	16	-1	0	0	1	1	1	22	3.10401	9335
1	2	1	22	1	0	0	1	1	1	16	3.10401	10751
3	2	1	16	1	0	0	3	1	1	22	3.10401	34188
1	2	1	16	-1	0	0	1	2	1	22	3.10401	9352
1	2	1	22	1	0	0	1	2	1	16	3.10401	10771
4	2	1	16	-1	0	0	4	2	1	22	3.10402	46371
4	2	1	22	1	0	0	4	2	1	16	3.10402	47873
3	1	1	16	1	0	0	3	2	1	22	3.10403	28031
4	1	1	22	1	0	0	4	2	1	16	3.10403	41706
3	2	1	22	-1	0	0	3	1	1	16	3.10403	35502
4	2	1	16	-1	0	0	4	1	1	22	3.10403	46354
3	2	1	16	1	0	0	3	2	1	22	3.10403	34205
3	2	1	22	-1	0	0	3	2	1	16	3.10403	35522
4	1	1	16	-1	0	0	4	2	1	22	3.10404	40197
4	2	1	22	1	0	0	4	1	1	16	3.10404	47853
4	1	1	16	-1	0	0	4	1	1	22	3.10405	40180
4	1	1	22	1	0	0	4	1	1	16	3.10405	41686
1	1	1	27	0	0	1	4	1	1	18	3.11484	5825
2	1	1	27	0	0	0	3	1	1	18	3.11484	18193
3	1	1	18	0	0	0	2	1	1	27	3.11484	28448
4	1	1	18	0	0	-1	1	1	1	27	3.11484	40748
1	1	1	18	0	0	0	4	1	1	27	3.11485	3719
2	1	1	18	0	0	1	3	1	1	27	3.11485	16071
3	1	1	27	0	0	-1	2	1	1	18	3.11485	30487
4	1	1	27	0	0	0	1	1	1	18	3.11485	42772
1	1	1	27	0	0	1	4	2	1	18	3.11485	5839
2	1	1	27	0	0	0	3	2	1	18	3.11485	18207
3	1	1	27	0	0	-1	2	2	1	18	3.11485	30501
4	1	1	27	0	0	0	1	2	1	18	3.11485	42786
1	2	1	18	0	0	0	4	1	1	27	3.11485	9893
2	2	1	18	0	0	1	3	1	1	27	3.11485	22245
3	2	1	18	0	0	0	2	1	1	27	3.11485	34622
4	2	1	18	0	0	-1	1	1	1	27	3.11485	46922
1	1	1	2	0	0	0	4	1	1	24	3.12536	25
4	1	1	24	0	0	0	1	1	1	2	3.12536	42006
1	1	1	2	0	0	0	4	2	1	24	3.12536	38
4	1	1	24	0	0	0	1	2	1	2	3.12536	42031
1	2	1	2	0	0	0	4	1	1	24	3.12536	6199
4	2	1	24	0	0	0	1	1	1	2	3.12536	48173
1	2	1	2	0	0	0	4	2	1	24	3.12536	6212
4	2	1	24	0	0	0	1	2	1	2	3.12536	48198
2	1	1	2	0	0	1	3	2	1	24	3.12537	12528
3	1	1	2	0	0	0	2	2	1	24	3.12537	24864
2	2	1	24	0	0	0	3	1	1	2	3.12537	23700
3	2	1	24	0	0	-1	2	1	1	2	3.12537	36031
2	1	1	2	0	0	1	3	1	1	24	3.12538	12515
2	1	1	24	0	0	0	3	1	1	2	3.12538	17533
3	1	1	2	0	0	0	2	1	1	24	3.12538	24851
3	1	1	24	0	0	-1	2	1	1	2	3.12538	29864
2	2	1	2	0	0	1	3	2	1	24	3.12538	18702
3	2	1	24	0	0	-1	2	2	1	2	3.12538	36056
1	1	1	24	0	0	1	4	1	1	2	3.12539	5009
4	1	1	2	0	0	-1	1	1	1	24	3.12539	37027
2	1	1	24	0	0	0	3	2	1	2	3.12539	17558
3	1	1	24	0	0	-1	2	2	1	2	3.12539	29889
4	1	1	2	0	0	-1	1	2	1	24	3.12539	37040
1	2	1	24	0	0	1	4	1	1	2	3.12539	11176
2	2	1	2	0	0	1	3	1	1	24	3.12539	18689
3	2	1	2	0	0	0	2	1	1	24	3.12539	31025
4	2	1	2	0	0	-1	1	1	1	24	3.12539	43201
2	2	1	24	0	0	0	3	2	1	2	3.12539	23725
3	2	1	2	0	0	0	2	2	1	24	3.12539	31038
4	2	1	2	0	0	-1	1	2	1	24	3.12539	43214
1	1	1	24	0	0	1	4	2	1	2	3.1254	5034
1	2	1	24	0	0	1	4	2	1	2	3.1254	11201
1	1	1	23	2	0	1	3	2	1	21	3.13033	4999
3	2	1	21	-2	0	-1	1	1	1	23	3.13033	35159
2	1	1	23	-2	1	0	4	2	1	21	3.13034	17145
3	1	1	23	-2	0	-1	1	2	1	21	3.13034	29448
4	1	1	23	2	-1	0	2	2	1	21	3.13034	41968
1	2	1	21	2	0	1	3	1	1	23	3.13034	10682
2	2	1	21	-2	1	0	4	1	1	23	3.13034	22834
4	2	1	21	2	-1	0	2	1	1	23	3.13034	47673
1	2	1	21	2	0	1	3	2	1	23	3.13034	10693
1	2	1	23	2	0	1	3	2	1	21	3.13034	11166
2	2	1	23	-2	1	0	4	2	1	21	3.13034	23312
3	2	1	21	-2	0	-1	1	2	1	23	3.13034	35170
3	2	1	23	-2	0	-1	1	2	1	21	3.13034	35615
4	2	1	21	2	-1	0	2	2	1	23	3.13034	47684
2	2	1	21	-2	1	0	4	2	1	23	3.13036	22845
4	2	1	23	2	-1	0	2	2	1	21	3.13036	48135
3	1	1	12	0	0	0	4	1	1	26	3.13501	27062
4	1	1	26	0	0	0	3	1	1	12	3.13501	42605
3	1	1	26	0	1	0	4	2	1	12	3.13501	30311
4	1	1	26	0	0	0	3	2	1	12	3.13501	42618
3	2	1	12	0	0	0	4	1	1	26	3.13501	33236
4	2	1	12	0	-1	0	3	1	1	26	3.13501	45497
1	1	1	12	0	0	0	2	1	1	26	3.13502	2326
1	1	1	26	0	-1	0	2	1	1	12	3.13502	5537
2	1	1	12	0	1	0	1	1	1	26	3.13502	14730
2	1	1	26	0	0	0	1	1	1	12	3.13502	17894
3	1	1	26	0	1	0	4	1	1	12	3.13502	30298
4	1	1	12	0	-1	0	3	1	1	26	3.13502	39323
1	1	1	26	0	-1	0	2	2	1	12	3.13502	5550
2	1	1	26	0	0	0	1	2	1	12	3.13502	17907
1	2	1	12	0	0	0	2	1	1	26	3.13502	8500
2	2	1	12	0	1	0	1	1	1	26	3.13502	20904
2	1	1	23	-1	0	0	3	1	1	12	3.14825	17205
3	1	1	12	1	0	0	2	1	1	23	3.14825	27107
2	1	1	23	-1	0	0	3	2	1	12	3.14825	17222
3	2	1	12	1	0	0	2	1	1	23	3.14825	33281
1	1	1	12	-1	0	0	4	1	1	23	3.14826	2278
1	1	1	23	1	0	1	4	1	1	12	3.14826	4918
4	1	1	12	-1	0	-1	1	1	1	23	3.14826	39255
4	1	1	23	1	0	0	1	1	1	12	3.14826	41853
1	1	1	12	-1	0	0	4	2	1	23	3.14826	2288
1	1	1	23	1	0	1	4	2	1	12	3.14826	4935
3	1	1	12	1	0	0	2	2	1	23	3.14826	27117
4	1	1	12	-1	0	-1	1	2	1	23	3.14826	39265
4	1	1	23	1	0	0	1	2	1	12	3.14826	41870
1	2	1	12	-1	0	0	4	1	1	23	3.14826	8452
1	2	1	23	1	0	1	4	1	1	12	3.14826	11085
2	2	1	23	-1	0	0	3	1	1	12	3.14826	23372
4	2	1	12	-1	0	-1	1	1	1	23	3.14826	45429
4	2	1	23	1	0	0	1	1	1	12	3.14826	48020
1	2	1	12	-1	0	0	4	2	1	23	3.14826	8462
1	2	1	23	1	0	1	4	2	1	12	3.14826	11102
2	2	1	12	1	0	1	3	2	1	23	3.14826	20980
2	2	1	23	-1	0	0	3	2	1	12	3.14826	23389
3	2	1	12	1	0	0	2	2	1	23	3.14826	33291
3	2	1	23	-1	0	-1	2	2	1	12	3.14826	35721
4	2	1	12	-1	0	-1	1	2	1	23	3.14826	45439
4	2	1	23	1	0	0	1	2	1	12	3.14826	48037
2	1	1	12	1	0	1	3	1	1	23	3.14827	14796
3	1	1	23	-1	0	-1	2	1	1	12	3.14827	29537
2	1	1	12	1	0	1	3	2	1	23	3.14827	14806
3	1	1	23	-1	0	-1	2	2	1	12	3.14827	29554
2	2	1	12	1	0	1	3	1	1	23	3.14827	20970
3	2	1	23	-1	0	-1	2	1	1	12	3.14827	35704
1	1	1	5	1	0	1	4	1	1	17	3.15038	841
2	1	1	5	-1	0	0	3	1	1	17	3.15038	13090
3	1	1	17	1	0	0	2	1	1	5	3.15038	28232
4	1	1	17	-1	0	-1	1	1	1	5	3.15038	40380
2	1	1	5	-1	0	0	3	2	1	17	3.15038	13105
3	1	1	17	1	0	0	2	2	1	5	3.15038	28246
4	1	1	17	-1	0	-1	1	2	1	5	3.15038	40394
1	2	1	5	1	0	1	4	1	1	17	3.15038	7015
2	2	1	5	-1	0	0	3	1	1	17	3.15038	19264
3	2	1	17	1	0	0	2	1	1	5	3.15038	34406
2	2	1	5	-1	0	0	3	2	1	17	3.15038	19279
3	2	1	17	1	0	0	2	2	1	5	3.15038	34420
1	1	1	17	-1	0	0	4	1	1	5	3.15039	3408
2	1	1	17	1	0	1	3	1	1	5	3.15039	15926
3	1	1	5	-1	0	-1	2	1	1	17	3.15039	25430
4	1	1	5	1	0	0	1	1	1	17	3.15039	37774
1	1	1	5	1	0	1	4	2	1	17	3.15039	856
1	1	1	17	-1	0	0	4	2	1	5	3.15039	3422
2	1	1	17	1	0	1	3	2	1	5	3.15039	15940
3	1	1	5	-1	0	-1	2	2	1	17	3.15039	25445
4	1	1	5	1	0	0	1	2	1	17	3.15039	37789
1	2	1	17	-1	0	0	4	1	1	5	3.15039	9582
2	2	1	17	1	0	1	3	1	1	5	3.15039	22100
3	2	1	5	-1	0	-1	2	1	1	17	3.15039	31604
4	2	1	5	1	0	0	1	1	1	17	3.15039	43948
4	2	1	17	-1	0	-1	1	1	1	5	3.15039	46554
1	2	1	5	1	0	1	4	2	1	17	3.15039	7030
1	2	1	17	-1	0	0	4	2	1	5	3.15039	9596
2	2	1	17	1	0	1	3	2	1	5	3.15039	22114
3	2	1	5	-1	0	-1	2	2	1	17	3.15039	31619
4	2	1	5	1	0	0	1	2	1	17	3.15039	43963
4	2	1	17	-1	0	-1	1	2	1	5	3.15039	46568
4	1	1	16	1	0	0	3	2	1	28	3.15548	40370
3	2	1	28	-1	0	0	4	1	1	16	3.15548	36893
3	2	1	16	-1	1	0	4	2	1	28	3.15548	34051
4	2	1	28	1	-1	0	3	2	1	16	3.15548	49249
1	1	1	16	1	-1	0	2	2	1	28	3.15549	3330
2	1	1	16	-1	0	0	1	2	1	28	3.15549	15503
3	1	1	16	-1	1	0	4	2	1	28	3.15549	27877
1	2	1	28	1	0	0	2	1	1	16	3.15549	12211
2	2	1	28	-1	1	0	1	1	1	16	3.15549	24516
4	2	1	28	1	-1	0	3	1	1	16	3.15549	49224
1	2	1	16	1	-1	0	2	2	1	28	3.15549	9504
1	2	1	28	1	0	0	2	2	1	16	3.15549	12236
2	2	1	16	-1	0	0	1	2	1	28	3.15549	21677
2	2	1	28	-1	1	0	1	2	1	16	3.15549	24541
3	2	1	28	-1	0	0	4	2	1	16	3.1555	36918
4	2	1	16	1	0	0	3	2	1	28	3.1555	46544
3	1	1	8	-1	1	0	4	1	1	18	3.15671	26133
4	1	1	18	1	-1	0	3	1	1	8	3.15671	40805
4	1	1	18	1	-1	0	3	2	1	8	3.15671	40830
3	2	1	8	-1	1	0	4	1	1	18	3.15671	32307
1	1	1	8	1	-1	0	2	1	1	18	3.15672	1429
1	1	1	18	1	0	0	2	1	1	8	3.15672	3784
2	1	1	8	-1	0	0	1	1	1	18	3.15672	13697
2	1	1	18	-1	1	0	1	1	1	8	3.15672	15977
2	1	1	8	-1	0	0	1	2	1	18	3.15672	13709
2	1	1	18	-1	1	0	1	2	1	8	3.15672	16002
3	1	1	8	-1	1	0	4	2	1	18	3.15672	26145
4	1	1	8	1	0	0	3	2	1	18	3.15672	38530
1	2	1	8	1	-1	0	2	1	1	18	3.15672	7603
1	2	1	18	1	0	0	2	1	1	8	3.15672	9958
3	2	1	18	-1	0	0	4	1	1	8	3.15672	34508
4	2	1	18	1	-1	0	3	1	1	8	3.15672	46979
3	2	1	8	-1	1	0	4	2	1	18	3.15672	32319
4	2	1	18	1	-1	0	3	2	1	8	3.15672	47004
3	1	1	18	-1	0	0	4	1	1	8	3.15673	28334
4	1	1	8	1	0	0	3	1	1	18	3.15673	38518
1	1	1	8	1	-1	0	2	2	1	18	3.15673	1441
1	1	1	18	1	0	0	2	2	1	8	3.15673	3809
2	2	1	8	-1	0	0	1	1	1	18	3.15673	19871
2	2	1	18	-1	1	0	1	1	1	8	3.15673	22151
1	2	1	8	1	-1	0	2	2	1	18	3.15673	7615
1	2	1	18	1	0	0	2	2	1	8	3.15673	9983
2	2	1	8	-1	0	0	1	2	1	18	3.15673	19883
2	2	1	18	-1	1	0	1	2	1	8	3.15673	22176
3	2	1	18	-1	0	0	4	2	1	8	3.15673	34533
4	2	1	8	1	0	0	3	2	1	18	3.15673	44704
3	1	1	18	-1	0	0	4	2	1	8	3.15674	28359
4	2	1	8	1	0	0	3	1	1	18	3.15674	44692
1	1	1	18	0	0	0	2	1	1	16	3.16756	3673
2	1	1	16	0	0	0	1	1	1	18	3.16756	15555
1	1	1	16	0	-1	0	2	2	1	18	3.16756	3229
1	1	1	18	0	0	0	2	2	1	16	3.16756	3688
2	1	1	16	0	0	0	1	2	1	18	3.16756	15569
1	2	1	18	0	0	0	2	1	1	16	3.16756	9847
2	2	1	16	0	0	0	1	1	1	18	3.16756	21729
2	2	1	18	0	1	0	1	1	1	16	3.16756	22267
1	2	1	16	0	-1	0	2	2	1	18	3.16756	9403
1	2	1	18	0	0	0	2	2	1	16	3.16756	9862
2	2	1	16	0	0	0	1	2	1	18	3.16756	21743
2	2	1	18	0	1	0	1	2	1	16	3.16756	22282
1	1	1	16	0	-1	0	2	1	1	18	3.16757	3215
2	1	1	18	0	1	0	1	1	1	16	3.16757	16093
2	1	1	18	0	1	0	1	2	1	16	3.16757	16108
3	1	1	16	0	1	0	4	2	1	18	3.16757	27977
3	1	1	18	0	0	0	4	2	1	16	3.16757	28485
4	1	1	16	0	0	0	3	2	1	18	3.16757	40303
1	2	1	16	0	-1	0	2	1	1	18	3.16757	9389
3	2	1	18	0	0	0	4	1	1	16	3.16757	34644
4	2	1	16	0	0	0	3	1	1	18	3.16757	46463
4	2	1	18	0	-1	0	3	1	1	16	3.16757	46888
3	2	1	16	0	1	0	4	2	1	18	3.16757	34151
3	2	1	18	0	0	0	4	2	1	16	3.16757	34659
4	2	1	16	0	0	0	3	2	1	18	3.16757	46477
4	2	1	18	0	-1	0	3	2	1	16	3.16757	46903
3	1	1	16	0	1	0	4	1	1	18	3.16758	27963
3	1	1	18	0	0	0	4	1	1	16	3.16758	28470
4	1	1	16	0	0	0	3	1	1	18	3.16758	40289
4	1	1	18	0	-1	0	3	1	1	16	3.16758	40714
4	1	1	18	0	-1	0	3	2	1	16	3.16759	40729
3	2	1	16	0	1	0	4	1	1	18	3.16759	34137
1	1	1	12	-1	0	0	1	2	1	27	3.16874	2269
2	1	1	12	1	0	0	2	2	1	27	3.16874	14787
1	2	1	27	1	0	0	1	1	1	12	3.16874	11924
2	2	1	27	-1	0	0	2	1	1	12	3.16874	24267
1	2	1	12	-1	0	0	1	2	1	27	3.16874	8443
1	2	1	27	1	0	0	1	2	1	12	3.16874	11941
2	2	1	12	1	0	0	2	2	1	27	3.16874	20961
2	2	1	27	-1	0	0	2	2	1	12	3.16874	24284
4	2	1	12	-1	0	0	4	2	1	27	3.16874	45465
4	2	1	27	1	0	0	4	2	1	12	3.16874	49048
3	1	1	12	1	0	0	3	2	1	27	3.16875	27143
3	2	1	27	-1	0	0	3	1	1	12	3.16875	36635
3	2	1	12	1	0	0	3	2	1	27	3.16875	33317
3	2	1	27	-1	0	0	3	2	1	12	3.16875	36652
4	1	1	12	-1	0	0	4	2	1	27	3.16876	39291
4	2	1	27	1	0	0	4	1	1	12	3.16876	49031
2	1	1	23	-2	1	0	4	2	1	28	3.17574	17150
4	2	1	28	2	-1	0	2	1	1	23	3.17574	49311
2	2	1	23	-2	1	0	4	2	1	28	3.17574	23317
4	2	1	28	2	-1	0	2	2	1	23	3.17574	49320
1	1	1	23	2	0	1	3	2	1	28	3.17575	5004
3	1	1	23	-2	0	-1	1	2	1	28	3.17575	29453
1	2	1	28	2	0	1	3	1	1	23	3.17575	12322
3	2	1	28	-2	0	-1	1	1	1	23	3.17575	36773
1	2	1	23	2	0	1	3	2	1	28	3.17575	11171
1	2	1	28	2	0	1	3	2	1	23	3.17575	12331
3	2	1	23	-2	0	-1	1	2	1	28	3.17575	35620
3	2	1	28	-2	0	-1	1	2	1	23	3.17575	36782
4	1	1	23	2	-1	0	2	2	1	28	3.17576	41973
2	2	1	28	-2	1	0	4	1	1	23	3.17576	24450
4	2	1	23	2	-1	0	2	2	1	28	3.17576	48140
2	2	1	28	-2	1	0	4	2	1	23	3.17577	24459
3	1	1	13	0	0	0	4	1	1	26	3.17802	27318
4	1	1	26	0	0	0	3	1	1	13	3.17802	42606
1	1	1	26	0	-1	0	2	2	1	13	3.17802	5551
3	1	1	26	0	1	0	4	2	1	13	3.17802	30312
4	1	1	26	0	0	0	3	2	1	13	3.17802	42619
2	2	1	13	0	1	0	1	1	1	26	3.17802	21148
3	2	1	13	0	0	0	4	1	1	26	3.17802	33492
4	2	1	13	0	-1	0	3	1	1	26	3.17802	45718
1	1	1	13	0	0	0	2	1	1	26	3.17803	2535
1	1	1	26	0	-1	0	2	1	1	13	3.17803	5538
2	1	1	13	0	1	0	1	1	1	26	3.17803	14974
2	1	1	26	0	0	0	1	1	1	13	3.17803	17895
3	1	1	26	0	1	0	4	1	1	13	3.17803	30299
4	1	1	13	0	-1	0	3	1	1	26	3.17803	39544
2	1	1	26	0	0	0	1	2	1	13	3.17803	17908
1	2	1	13	0	0	0	2	1	1	26	3.17803	8709
4	2	1	16	-1	0	0	4	2	1	27	3.1795	46376
4	2	1	27	1	0	0	4	2	1	16	3.1795	49052
1	1	1	16	-1	0	0	1	2	1	27	3.17951	3183
2	1	1	16	1	0	0	2	2	1	27	3.17951	15683
3	1	1	16	1	0	0	3	2	1	27	3.17951	28036
1	2	1	27	1	0	0	1	1	1	16	3.17951	11928
2	2	1	27	-1	0	0	2	1	1	16	3.17951	24271
3	2	1	27	-1	0	0	3	1	1	16	3.17951	36639
1	2	1	16	-1	0	0	1	2	1	27	3.17951	9357
1	2	1	27	1	0	0	1	2	1	16	3.17951	11945
2	2	1	16	1	0	0	2	2	1	27	3.17951	21857
2	2	1	27	-1	0	0	2	2	1	16	3.17951	24288
4	1	1	16	-1	0	0	4	2	1	27	3.17952	40202
4	2	1	27	1	0	0	4	1	1	16	3.17952	49035
3	2	1	16	1	0	0	3	2	1	27	3.17952	34210
3	2	1	27	-1	0	0	3	2	1	16	3.17952	36656
1	1	1	27	1	-1	0	2	1	1	19	3.18184	5857
2	1	1	19	-1	1	0	1	1	1	27	3.18184	16265
3	1	1	19	-1	0	0	4	1	1	27	3.18184	28628
3	1	1	27	-1	1	0	4	1	1	19	3.18184	30455
4	1	1	19	1	-1	0	3	1	1	27	3.18184	41014
4	1	1	27	1	0	0	3	1	1	19	3.18184	42918
1	1	1	19	1	0	0	2	1	1	27	3.18185	3998
2	1	1	27	-1	0	0	1	1	1	19	3.18185	18060
1	1	1	27	1	-1	0	2	2	1	19	3.18185	5873
3	1	1	27	-1	1	0	4	2	1	19	3.18185	30471
4	1	1	27	1	0	0	3	2	1	19	3.18185	42934
2	2	1	19	-1	1	0	1	1	1	27	3.18185	22439
3	2	1	19	-1	0	0	4	1	1	27	3.18185	34802
4	2	1	19	1	-1	0	3	1	1	27	3.18185	47188
2	1	1	27	-1	0	0	1	2	1	19	3.18186	18076
1	2	1	19	1	0	0	2	1	1	27	3.18186	10172
1	1	1	9	1	0	1	3	2	1	26	3.18923	1773
2	1	1	9	-1	1	0	4	2	1	26	3.18923	14004
3	2	1	26	-1	0	-1	1	1	1	9	3.18923	36363
4	2	1	26	1	-1	0	2	1	1	9	3.18923	48687
1	2	1	9	1	0	1	3	2	1	26	3.18923	7947
2	2	1	9	-1	1	0	4	2	1	26	3.18923	20178
3	2	1	26	-1	0	-1	1	2	1	9	3.18923	36389
4	2	1	26	1	-1	0	2	2	1	9	3.18923	48713
2	2	1	26	-1	1	0	4	2	1	9	3.18924	24145
4	2	1	9	1	-1	0	2	2	1	26	3.18924	44882
3	1	1	9	-1	0	-1	1	2	1	26	3.18925	26271
4	1	1	9	1	-1	0	2	2	1	26	3.18925	38708
1	2	1	26	1	0	1	3	1	1	9	3.18925	11767
2	2	1	26	-1	1	0	4	1	1	9	3.18925	24119
1	2	1	26	1	0	1	3	2	1	9	3.18925	11793
3	2	1	9	-1	0	-1	1	2	1	26	3.18925	32445
2	1	1	22	-1	0	0	2	1	1	26	3.20118	16946
2	1	1	26	1	0	0	2	1	1	22	3.20118	18003
3	1	1	22	-1	0	0	3	1	1	26	3.20119	29341
3	1	1	26	1	0	0	3	1	1	22	3.20119	30349
2	1	1	26	1	0	0	2	2	1	22	3.20119	18019
2	2	1	22	-1	0	0	2	1	1	26	3.20119	23113
1	1	1	22	1	0	0	1	1	1	26	3.2012	4590
1	1	1	26	-1	0	0	1	1	1	22	3.2012	5491
1	1	1	26	-1	0	0	1	2	1	22	3.2012	5507
1	2	1	22	1	0	0	1	1	1	26	3.2012	10757
3	1	1	26	1	0	0	3	2	1	22	3.20121	30365
3	2	1	22	-1	0	0	3	1	1	26	3.20121	35508
4	1	1	22	1	0	0	4	1	1	26	3.20122	41692
4	1	1	26	-1	0	0	4	1	1	22	3.20122	42503
4	1	1	26	-1	0	0	4	2	1	22	3.20122	42519
4	2	1	22	1	0	0	4	1	1	26	3.20122	47859
1	1	1	23	2	0	1	3	2	1	27	3.21087	5003
3	2	1	27	-2	0	-1	1	1	1	23	3.21087	36537
4	1	1	23	2	-1	0	2	2	1	27	3.21088	41972
2	2	1	27	-2	1	0	4	1	1	23	3.21088	24222
4	2	1	27	2	-1	0	2	1	1	23	3.21088	49066
1	2	1	23	2	0	1	3	2	1	27	3.21088	11170
2	2	1	23	-2	1	0	4	2	1	27	3.21088	23316
3	2	1	27	-2	0	-1	1	2	1	23	3.21088	36548
4	2	1	27	2	-1	0	2	2	1	23	3.21088	49077
2	1	1	23	-2	1	0	4	2	1	27	3.21089	17149
3	1	1	23	-2	0	-1	1	2	1	27	3.21089	29452
1	2	1	27	2	0	1	3	1	1	23	3.21089	12085
1	2	1	27	2	0	1	3	2	1	23	3.21089	12096
3	2	1	23	-2	0	-1	1	2	1	27	3.21089	35619
2	2	1	27	-2	1	0	4	2	1	23	3.2109	24233
4	2	1	23	2	-1	0	2	2	1	27	3.2109	48139
4	1	1	26	1	0	0	3	2	1	27	3.21379	42707
3	2	1	27	-1	0	0	4	1	1	26	3.21379	36683
1	1	1	26	1	-1	0	2	2	1	27	3.2138	5653
2	1	1	26	-1	0	0	1	2	1	27	3.2138	17831
1	2	1	27	1	0	0	2	1	1	26	3.2138	11972
2	2	1	27	-1	1	0	1	1	1	26	3.2138	24322
3	1	1	26	-1	1	0	4	2	1	27	3.21381	30219
4	2	1	27	1	-1	0	3	1	1	26	3.21381	48967
3	1	1	6	-1	1	0	4	1	1	18	3.21655	25721
4	1	1	18	1	-1	0	3	1	1	6	3.21655	40803
1	1	1	6	1	-1	0	2	1	1	18	3.21656	968
1	1	1	18	1	0	0	2	1	1	6	3.21656	3782
2	1	1	6	-1	0	0	1	1	1	18	3.21656	13268
2	1	1	18	-1	1	0	1	1	1	6	3.21656	15975
2	1	1	6	-1	0	0	1	2	1	18	3.21656	13279
2	1	1	18	-1	1	0	1	2	1	6	3.21656	16000
3	1	1	6	-1	1	0	4	2	1	18	3.21656	25732
4	1	1	18	1	-1	0	3	2	1	6	3.21656	40828
1	2	1	6	1	-1	0	2	1	1	18	3.21656	7142
1	2	1	18	1	0	0	2	1	1	6	3.21656	9956
3	2	1	6	-1	1	0	4	1	1	18	3.21656	31895
4	2	1	18	1	-1	0	3	1	1	6	3.21656	46977
3	1	1	18	-1	0	0	4	1	1	6	3.21657	28332
4	1	1	6	1	0	0	3	1	1	18	3.21657	38072
1	1	1	6	1	-1	0	2	2	1	18	3.21657	979
1	1	1	18	1	0	0	2	2	1	6	3.21657	3807
3	1	1	18	-1	0	0	4	2	1	6	3.21657	28357
2	2	1	6	-1	0	0	1	1	1	18	3.21657	19442
2	2	1	18	-1	1	0	1	1	1	6	3.21657	22149
4	2	1	6	1	0	0	3	1	1	18	3.21657	44246
1	2	1	6	1	-1	0	2	2	1	18	3.21657	7153
1	2	1	18	1	0	0	2	2	1	6	3.21657	9981
2	2	1	6	-1	0	0	1	2	1	18	3.21657	19453
2	2	1	18	-1	1	0	1	2	1	6	3.21657	22174
3	2	1	6	-1	1	0	4	2	1	18	3.21657	31906
4	2	1	18	1	-1	0	3	2	1	6	3.21657	47002
4	1	1	6	1	0	0	3	2	1	18	3.21658	38083
3	2	1	18	-1	0	0	4	1	1	6	3.21658	34506
3	2	1	18	-1	0	0	4	2	1	6	3.21658	34531
4	2	1	6	1	0	0	3	2	1	18	3.21658	44257
2	1	1	24	-1	0	0	3	1	1	16	3.21773	17430
3	1	1	16	1	0	0	2	1	1	24	3.21773	27989
1	1	1	24	1	0	1	4	2	1	16	3.21773	5214
3	1	1	16	1	0	0	2	2	1	24	3.21773	27999
2	2	1	24	-1	0	0	3	1	1	16	3.21773	23597
4	2	1	16	-1	0	-1	1	1	1	24	3.21773	46329
1	2	1	24	1	0	1	4	2	1	16	3.21773	11381
2	2	1	24	-1	0	0	3	2	1	16	3.21773	23612
3	2	1	16	1	0	0	2	2	1	24	3.21773	34173
4	2	1	16	-1	0	-1	1	2	1	24	3.21773	46339
1	1	1	16	-1	0	0	4	1	1	24	3.21774	3193
1	1	1	24	1	0	1	4	1	1	16	3.21774	5199
4	1	1	16	-1	0	-1	1	1	1	24	3.21774	40155
4	1	1	24	1	0	0	1	1	1	16	3.21774	42110
2	1	1	24	-1	0	0	3	2	1	16	3.21774	17445
4	1	1	16	-1	0	-1	1	2	1	24	3.21774	40165
4	1	1	24	1	0	0	1	2	1	16	3.21774	42125
1	2	1	16	-1	0	0	4	1	1	24	3.21774	9367
1	2	1	24	1	0	1	4	1	1	16	3.21774	11366
3	2	1	16	1	0	0	2	1	1	24	3.21774	34163
2	1	1	16	1	0	1	3	1	1	24	3.21775	15693
3	1	1	24	-1	0	-1	2	1	1	16	3.21775	29751
1	1	1	16	-1	0	0	4	2	1	24	3.21775	3203
2	1	1	16	1	0	1	3	2	1	24	3.21775	15703
3	1	1	24	-1	0	-1	2	2	1	16	3.21775	29766
2	2	1	16	1	0	1	3	1	1	24	3.21775	21867
3	2	1	24	-1	0	-1	2	1	1	16	3.21775	35918
4	2	1	24	1	0	0	1	1	1	16	3.21775	48277
1	2	1	16	-1	0	0	4	2	1	24	3.21775	9377
2	2	1	16	1	0	1	3	2	1	24	3.21775	21877
3	2	1	24	-1	0	-1	2	2	1	16	3.21775	35933
4	2	1	24	1	0	0	1	2	1	16	3.21775	48292
1	1	1	11	-1	0	0	4	1	1	23	3.22615	2044
1	1	1	23	1	0	1	4	1	1	11	3.22615	4917
2	1	1	23	-1	0	0	3	1	1	11	3.22615	17204
3	1	1	11	1	0	0	2	1	1	23	3.22615	26868
4	1	1	11	-1	0	-1	1	1	1	23	3.22615	39012
4	1	1	23	1	0	0	1	1	1	11	3.22615	41852
1	1	1	11	-1	0	0	4	2	1	23	3.22615	2054
2	1	1	23	-1	0	0	3	2	1	11	3.22615	17221
3	1	1	11	1	0	0	2	2	1	23	3.22615	26878
4	1	1	11	-1	0	-1	1	2	1	23	3.22615	39022
4	1	1	23	1	0	0	1	2	1	11	3.22615	41869
1	2	1	11	-1	0	0	4	1	1	23	3.22615	8218
1	2	1	23	1	0	1	4	1	1	11	3.22615	11084
2	2	1	23	-1	0	0	3	1	1	11	3.22615	23371
3	2	1	11	1	0	0	2	1	1	23	3.22615	33042
4	2	1	11	-1	0	-1	1	1	1	23	3.22615	45186
4	2	1	23	1	0	0	1	1	1	11	3.22615	48019
1	2	1	11	-1	0	0	4	2	1	23	3.22615	8228
2	2	1	23	-1	0	0	3	2	1	11	3.22615	23388
3	2	1	11	1	0	0	2	2	1	23	3.22615	33052
4	2	1	23	1	0	0	1	2	1	11	3.22615	48036
1	1	1	23	1	0	1	4	2	1	11	3.22616	4934
2	1	1	11	1	0	1	3	2	1	23	3.22616	14576
3	2	1	23	-1	0	-1	2	1	1	11	3.22616	35703
1	2	1	23	1	0	1	4	2	1	11	3.22616	11101
2	2	1	11	1	0	1	3	2	1	23	3.22616	20750
3	2	1	23	-1	0	-1	2	2	1	11	3.22616	35720
4	2	1	11	-1	0	-1	1	2	1	23	3.22616	45196
2	1	1	11	1	0	1	3	1	1	23	3.22617	14566
3	1	1	23	-1	0	-1	2	1	1	11	3.22617	29536
3	1	1	23	-1	0	-1	2	2	1	11	3.22617	29553
2	2	1	11	1	0	1	3	1	1	23	3.22617	20740
1	1	1	19	1	0	0	2	1	1	3	3.2558	3974
2	1	1	3	-1	0	0	1	1	1	19	3.2558	12575
3	1	1	3	-1	1	0	4	1	1	19	3.2558	25028
4	1	1	19	1	-1	0	3	1	1	3	3.2558	40990
1	1	1	19	1	0	0	2	2	1	3	3.2558	4001
2	1	1	3	-1	0	0	1	2	1	19	3.2558	12586
3	1	1	3	-1	1	0	4	2	1	19	3.2558	25039
3	1	1	19	-1	0	0	4	2	1	3	3.2558	28631
1	2	1	19	1	0	0	2	1	1	3	3.2558	10148
2	2	1	3	-1	0	0	1	1	1	19	3.2558	18749
4	2	1	3	1	0	0	3	1	1	19	3.2558	43547
4	2	1	19	1	-1	0	3	1	1	3	3.2558	47164
1	2	1	19	1	0	0	2	2	1	3	3.2558	10175
2	2	1	3	-1	0	0	1	2	1	19	3.2558	18760
1	1	1	3	1	-1	0	2	1	1	19	3.25581	273
2	1	1	19	-1	1	0	1	1	1	3	3.25581	16241
3	1	1	19	-1	0	0	4	1	1	3	3.25581	28604
4	1	1	3	1	0	0	3	1	1	19	3.25581	37373
1	1	1	3	1	-1	0	2	2	1	19	3.25581	284
2	1	1	19	-1	1	0	1	2	1	3	3.25581	16268
4	1	1	3	1	0	0	3	2	1	19	3.25581	37384
4	1	1	19	1	-1	0	3	2	1	3	3.25581	41017
1	2	1	3	1	-1	0	2	1	1	19	3.25581	6447
2	2	1	19	-1	1	0	1	1	1	3	3.25581	22415
3	2	1	3	-1	1	0	4	1	1	19	3.25581	31202
3	2	1	19	-1	0	0	4	1	1	3	3.25581	34778
1	2	1	3	1	-1	0	2	2	1	19	3.25581	6458
2	2	1	19	-1	1	0	1	2	1	3	3.25581	22442
3	2	1	3	-1	1	0	4	2	1	19	3.25581	31213
3	2	1	19	-1	0	0	4	2	1	3	3.25581	34805
4	2	1	3	1	0	0	3	2	1	19	3.25581	43558
4	2	1	19	1	-1	0	3	2	1	3	3.25581	47191
1	1	1	25	0	0	1	4	1	1	18	3.25727	5301
4	1	1	18	0	0	-1	1	1	1	25	3.25727	40746
4	1	1	18	0	0	-1	1	2	1	25	3.25727	40761
1	2	1	25	0	0	1	4	1	1	18	3.25727	11468
1	1	1	18	0	0	0	4	1	1	25	3.25728	3717
4	1	1	25	0	0	0	1	1	1	18	3.25728	42283
1	1	1	18	0	0	0	4	2	1	25	3.25728	3732
1	1	1	25	0	0	1	4	2	1	18	3.25728	5323
2	1	1	18	0	0	1	3	2	1	25	3.25728	16084
4	1	1	25	0	0	0	1	2	1	18	3.25728	42305
1	2	1	18	0	0	0	4	1	1	25	3.25728	9891
3	2	1	25	0	0	-1	2	1	1	18	3.25728	36246
4	2	1	18	0	0	-1	1	1	1	25	3.25728	46920
4	2	1	25	0	0	0	1	1	1	18	3.25728	48450
1	2	1	18	0	0	0	4	2	1	25	3.25728	9906
1	2	1	25	0	0	1	4	2	1	18	3.25728	11490
2	2	1	18	0	0	1	3	2	1	25	3.25728	22258
3	2	1	25	0	0	-1	2	2	1	18	3.25728	36268
4	2	1	18	0	0	-1	1	2	1	25	3.25728	46935
4	2	1	25	0	0	0	1	2	1	18	3.25728	48472
2	1	1	18	0	0	1	3	1	1	25	3.25729	16069
2	1	1	25	0	0	0	3	1	1	18	3.25729	17754
3	1	1	18	0	0	0	2	1	1	25	3.25729	28446
3	1	1	25	0	0	-1	2	1	1	18	3.25729	30079
2	1	1	25	0	0	0	3	2	1	18	3.25729	17776
3	1	1	18	0	0	0	2	2	1	25	3.25729	28461
3	1	1	25	0	0	-1	2	2	1	18	3.25729	30101
2	2	1	18	0	0	1	3	1	1	25	3.25729	22243
2	2	1	25	0	0	0	3	1	1	18	3.25729	23921
3	2	1	18	0	0	0	2	1	1	25	3.25729	34620
2	2	1	25	0	0	0	3	2	1	18	3.25729	23943
3	2	1	18	0	0	0	2	2	1	25	3.25729	34635
3	1	1	7	-1	1	0	4	1	1	18	3.26448	25924
4	1	1	18	1	-1	0	3	1	1	7	3.26448	40804
4	1	1	18	1	-1	0	3	2	1	7	3.26448	40829
3	2	1	7	-1	1	0	4	1	1	18	3.26448	32098
1	1	1	7	1	-1	0	2	1	1	18	3.26449	1207
1	1	1	18	1	0	0	2	1	1	7	3.26449	3783
2	1	1	7	-1	0	0	1	1	1	18	3.26449	13479
2	1	1	18	-1	1	0	1	1	1	7	3.26449	15976
2	1	1	18	-1	1	0	1	2	1	7	3.26449	16001
3	1	1	7	-1	1	0	4	2	1	18	3.26449	25935
1	2	1	7	1	-1	0	2	1	1	18	3.26449	7381
4	2	1	18	1	-1	0	3	1	1	7	3.26449	46978
3	2	1	7	-1	1	0	4	2	1	18	3.26449	32109
4	2	1	18	1	-1	0	3	2	1	7	3.26449	47003
3	1	1	18	-1	0	0	4	1	1	7	3.2645	28333
4	1	1	7	1	0	0	3	1	1	18	3.2645	38309
1	1	1	7	1	-1	0	2	2	1	18	3.2645	1218
1	1	1	18	1	0	0	2	2	1	7	3.2645	3808
2	1	1	7	-1	0	0	1	2	1	18	3.2645	13490
4	1	1	7	1	0	0	3	2	1	18	3.2645	38320
1	2	1	18	1	0	0	2	1	1	7	3.2645	9957
2	2	1	7	-1	0	0	1	1	1	18	3.2645	19653
2	2	1	18	-1	1	0	1	1	1	7	3.2645	22150
3	2	1	18	-1	0	0	4	1	1	7	3.2645	34507
1	2	1	7	1	-1	0	2	2	1	18	3.2645	7392
1	2	1	18	1	0	0	2	2	1	7	3.2645	9982
2	2	1	7	-1	0	0	1	2	1	18	3.2645	19664
2	2	1	18	-1	1	0	1	2	1	7	3.2645	22175
3	1	1	18	-1	0	0	4	2	1	7	3.26451	28358
4	2	1	7	1	0	0	3	1	1	18	3.26451	44483
3	2	1	18	-1	0	0	4	2	1	7	3.26451	34532
4	2	1	7	1	0	0	3	2	1	18	3.26451	44494
1	1	1	19	0	0	0	4	2	1	24	3.26854	3918
2	1	1	19	0	0	1	3	2	1	24	3.26854	16364
3	2	1	24	0	0	-1	2	1	1	19	3.26854	36048
4	2	1	24	0	0	0	1	1	1	19	3.26854	48190
1	2	1	19	0	0	0	4	2	1	24	3.26854	10092
4	2	1	24	0	0	0	1	2	1	19	3.26854	48215
1	1	1	19	0	0	0	4	1	1	24	3.26855	3904
1	1	1	24	0	0	1	4	1	1	19	3.26855	5026
2	1	1	19	0	0	1	3	1	1	24	3.26855	16350
2	1	1	24	0	0	0	3	1	1	19	3.26855	17550
3	1	1	19	0	0	0	2	1	1	24	3.26855	28708
3	1	1	24	0	0	-1	2	1	1	19	3.26855	29881
4	1	1	19	0	0	-1	1	1	1	24	3.26855	40926
4	1	1	24	0	0	0	1	1	1	19	3.26855	42023
1	1	1	24	0	0	1	4	2	1	19	3.26855	5051
3	1	1	19	0	0	0	2	2	1	24	3.26855	28722
4	1	1	19	0	0	-1	1	2	1	24	3.26855	40940
4	1	1	24	0	0	0	1	2	1	19	3.26855	42048
1	2	1	19	0	0	0	4	1	1	24	3.26855	10078
1	2	1	24	0	0	1	4	1	1	19	3.26855	11193
2	2	1	24	0	0	0	3	1	1	19	3.26855	23717
4	2	1	19	0	0	-1	1	1	1	24	3.26855	47100
1	2	1	24	0	0	1	4	2	1	19	3.26855	11218
2	2	1	19	0	0	1	3	2	1	24	3.26855	22538
3	2	1	24	0	0	-1	2	2	1	19	3.26855	36073
4	2	1	19	0	0	-1	1	2	1	24	3.26855	47114
2	1	1	24	0	0	0	3	2	1	19	3.26856	17575
3	1	1	24	0	0	-1	2	2	1	19	3.26856	29906
2	2	1	19	0	0	1	3	1	1	24	3.26856	22524
3	2	1	19	0	0	0	2	1	1	24	3.26856	34882
2	2	1	24	0	0	0	3	2	1	19	3.26856	23742
3	2	1	19	0	0	0	2	2	1	24	3.26856	34896
1	1	1	28	0	0	1	4	1	1	13	3.27753	6053
2	1	1	28	0	0	0	3	1	1	13	3.27753	18395
3	1	1	13	0	0	0	2	1	1	28	3.27753	27292
4	1	1	13	0	0	-1	1	1	1	28	3.27753	39575
1	1	1	13	0	0	0	4	1	1	28	3.27754	2577
2	1	1	13	0	0	1	3	1	1	28	3.27754	14948
3	1	1	28	0	0	-1	2	1	1	13	3.27754	30734
4	1	1	28	0	0	0	1	1	1	13	3.27754	43023
1	1	1	28	0	0	1	4	2	1	13	3.27754	6072
2	1	1	28	0	0	0	3	2	1	13	3.27754	18414
3	1	1	28	0	0	-1	2	2	1	13	3.27754	30753
4	1	1	28	0	0	0	1	2	1	13	3.27754	43042
1	2	1	13	0	0	0	4	1	1	28	3.27754	8751
2	2	1	13	0	0	1	3	1	1	28	3.27754	21122
3	2	1	13	0	0	0	2	1	1	28	3.27754	33466
4	2	1	13	0	0	-1	1	1	1	28	3.27754	45749
1	1	1	5	2	0	1	3	2	1	26	3.31436	899
2	1	1	5	-2	1	0	4	2	1	26	3.31436	13034
3	1	1	5	-2	0	-1	1	2	1	26	3.31436	25350
1	2	1	26	2	0	1	3	1	1	5	3.31436	11838
3	2	1	26	-2	0	-1	1	1	1	5	3.31436	36311
4	2	1	26	2	-1	0	2	1	1	5	3.31436	48829
1	2	1	5	2	0	1	3	2	1	26	3.31436	7073
2	2	1	5	-2	1	0	4	2	1	26	3.31436	19208
3	2	1	26	-2	0	-1	1	2	1	5	3.31436	36323
4	2	1	26	2	-1	0	2	2	1	5	3.31436	48841
4	1	1	5	2	-1	0	2	2	1	26	3.31437	37881
2	2	1	26	-2	1	0	4	1	1	5	3.31437	23986
1	2	1	26	2	0	1	3	2	1	5	3.31437	11850
3	2	1	5	-2	0	-1	1	2	1	26	3.31437	31524
2	2	1	26	-2	1	0	4	2	1	5	3.31438	23998
4	2	1	5	2	-1	0	2	2	1	26	3.31438	44055
3	1	1	15	0	0	0	2	2	1	25	3.31814	27771
2	2	1	25	0	0	0	3	1	1	15	3.31814	23918
1	1	1	15	0	0	0	4	1	1	25	3.31815	2971
2	1	1	25	0	0	0	3	1	1	15	3.31815	17751
3	1	1	15	0	0	0	2	1	1	25	3.31815	27757
4	1	1	25	0	0	0	1	1	1	15	3.31815	42280
1	1	1	15	0	0	0	4	2	1	25	3.31815	2985
4	1	1	25	0	0	0	1	2	1	15	3.31815	42302
1	2	1	15	0	0	0	4	1	1	25	3.31815	9145
4	2	1	25	0	0	0	1	1	1	15	3.31815	48447
1	2	1	15	0	0	0	4	2	1	25	3.31815	9159
2	2	1	25	0	0	0	3	2	1	15	3.31815	23940
3	2	1	15	0	0	0	2	2	1	25	3.31815	33945
4	2	1	25	0	0	0	1	2	1	15	3.31815	48469
1	1	1	25	0	0	1	4	1	1	15	3.31816	5298
2	1	1	15	0	0	1	3	1	1	25	3.31816	15425
3	1	1	25	0	0	-1	2	1	1	15	3.31816	30076
4	1	1	15	0	0	-1	1	1	1	25	3.31816	39969
1	1	1	25	0	0	1	4	2	1	15	3.31816	5320
2	1	1	15	0	0	1	3	2	1	25	3.31816	15439
2	1	1	25	0	0	0	3	2	1	15	3.31816	17773
4	1	1	15	0	0	-1	1	2	1	25	3.31816	39983
1	2	1	25	0	0	1	4	1	1	15	3.31816	11465
3	2	1	15	0	0	0	2	1	1	25	3.31816	33931
3	2	1	25	0	0	-1	2	1	1	15	3.31816	36243
4	2	1	15	0	0	-1	1	1	1	25	3.31816	46143
1	2	1	25	0	0	1	4	2	1	15	3.31816	11487
2	2	1	15	0	0	1	3	2	1	25	3.31816	21613
3	2	1	25	0	0	-1	2	2	1	15	3.31816	36265
4	2	1	15	0	0	-1	1	2	1	25	3.31816	46157
3	1	1	25	0	0	-1	2	2	1	15	3.31817	30098
2	2	1	15	0	0	1	3	1	1	25	3.31817	21599
1	1	1	7	1	-1	1	3	1	1	27	3.32105	1241
1	1	1	27	1	-1	1	3	1	1	7	3.32105	5888
2	1	1	7	-1	0	0	4	1	1	27	3.32105	13535
3	1	1	7	-1	1	-1	1	1	1	27	3.32105	25898
3	1	1	27	-1	1	-1	1	1	1	7	3.32105	30410
4	1	1	27	1	0	0	2	1	1	7	3.32105	42877
1	1	1	27	1	-1	1	3	2	1	7	3.32105	5906
3	1	1	27	-1	1	-1	1	2	1	7	3.32105	30428
4	1	1	27	1	0	0	2	2	1	7	3.32105	42895
1	2	1	7	1	-1	1	3	1	1	27	3.32105	7415
2	2	1	7	-1	0	0	4	1	1	27	3.32105	19709
3	2	1	7	-1	1	-1	1	1	1	27	3.32105	32072
2	1	1	27	-1	0	0	4	1	1	7	3.32106	18089
4	1	1	7	1	0	0	2	1	1	27	3.32106	38283
2	1	1	27	-1	0	0	4	2	1	7	3.32107	18107
4	2	1	7	1	0	0	2	1	1	27	3.32107	44457
4	1	1	16	1	0	0	3	2	1	27	3.32805	40369
3	2	1	27	-1	0	0	4	1	1	16	3.32805	36675
2	2	1	16	-1	0	0	1	2	1	27	3.32807	21676
3	2	1	16	-1	1	0	4	2	1	27	3.32807	34050
4	2	1	27	1	-1	0	3	2	1	16	3.32807	48984
1	1	1	16	1	-1	0	2	2	1	27	3.32808	3329
2	1	1	16	-1	0	0	1	2	1	27	3.32808	15502
3	1	1	16	-1	1	0	4	2	1	27	3.32808	27876
1	2	1	27	1	0	0	2	1	1	16	3.32808	11964
2	2	1	27	-1	1	0	1	1	1	16	3.32808	24314
4	2	1	27	1	-1	0	3	1	1	16	3.32808	48959
1	2	1	16	1	-1	0	2	2	1	27	3.32808	9503
1	2	1	27	1	0	0	2	2	1	16	3.32808	11989
2	2	1	27	-1	1	0	1	2	1	16	3.32808	24339
3	2	1	27	-1	0	0	4	2	1	16	3.32808	36700
4	2	1	16	1	0	0	3	2	1	27	3.32808	46543
1	1	1	22	2	0	1	3	1	1	4	3.32895	4730
2	1	1	4	-2	1	0	4	1	1	22	3.32895	12779
3	1	1	4	-2	0	-1	1	1	1	22	3.32895	25102
4	1	1	4	2	-1	0	2	1	1	22	3.32895	37635
4	1	1	22	2	-1	0	2	1	1	4	3.32895	41714
1	1	1	4	2	0	1	3	2	1	22	3.32895	658
1	1	1	22	2	0	1	3	2	1	4	3.32895	4745
4	1	1	4	2	-1	0	2	2	1	22	3.32895	37647
4	1	1	22	2	-1	0	2	2	1	4	3.32895	41729
2	2	1	4	-2	1	0	4	1	1	22	3.32895	18953
2	2	1	22	-2	1	0	4	1	1	4	3.32895	23048
3	2	1	4	-2	0	-1	1	1	1	22	3.32895	31276
3	2	1	22	-2	0	-1	1	1	1	4	3.32895	35366
1	2	1	4	2	0	1	3	2	1	22	3.32895	6832
3	2	1	22	-2	0	-1	1	2	1	4	3.32895	35381
1	1	1	4	2	0	1	3	1	1	22	3.32896	646
2	1	1	22	-2	1	0	4	1	1	4	3.32896	16881
3	1	1	22	-2	0	-1	1	1	1	4	3.32896	29199
2	1	1	4	-2	1	0	4	2	1	22	3.32896	12791
2	1	1	22	-2	1	0	4	2	1	4	3.32896	16896
3	1	1	4	-2	0	-1	1	2	1	22	3.32896	25114
3	1	1	22	-2	0	-1	1	2	1	4	3.32896	29214
1	2	1	4	2	0	1	3	1	1	22	3.32896	6820
1	2	1	22	2	0	1	3	1	1	4	3.32896	10897
4	2	1	4	2	-1	0	2	1	1	22	3.32896	43809
4	2	1	22	2	-1	0	2	1	1	4	3.32896	47881
1	2	1	22	2	0	1	3	2	1	4	3.32896	10912
2	2	1	4	-2	1	0	4	2	1	22	3.32896	18965
2	2	1	22	-2	1	0	4	2	1	4	3.32896	23063
3	2	1	4	-2	0	-1	1	2	1	22	3.32896	31288
4	2	1	4	2	-1	0	2	2	1	22	3.32896	43821
4	2	1	22	2	-1	0	2	2	1	4	3.32896	47896
2	1	1	5	-1	0	0	2	1	1	28	3.33335	13070
2	1	1	28	1	0	0	2	1	1	5	3.33335	18469
1	1	1	5	1	0	0	1	1	1	28	3.33336	766
1	1	1	28	-1	0	0	1	1	1	5	3.33336	5949
3	1	1	5	-1	0	0	3	1	1	28	3.33336	25467
3	1	1	28	1	0	0	3	1	1	5	3.33336	30816
1	1	1	28	-1	0	0	1	2	1	5	3.33336	5961
2	1	1	28	1	0	0	2	2	1	5	3.33336	18481
1	2	1	5	1	0	0	1	1	1	28	3.33336	6940
2	2	1	5	-1	0	0	2	1	1	28	3.33336	19244
4	1	1	5	1	0	0	4	1	1	28	3.33337	37849
4	1	1	28	-1	0	0	4	1	1	5	3.33337	42962
3	1	1	28	1	0	0	3	2	1	5	3.33337	30828
3	2	1	5	-1	0	0	3	1	1	28	3.33337	31641
4	1	1	28	-1	0	0	4	2	1	5	3.33338	42974
4	2	1	5	1	0	0	4	1	1	28	3.33338	44023
2	1	1	25	-1	0	0	4	1	1	27	3.33687	17664
4	1	1	27	1	0	0	2	1	1	25	3.33687	42886
1	1	1	27	1	-1	1	3	2	1	25	3.33687	5915
3	2	1	25	-1	1	-1	1	1	1	27	3.33687	36172
1	1	1	25	1	-1	1	3	1	1	27	3.33688	5388
1	1	1	27	1	-1	1	3	1	1	25	3.33688	5897
3	1	1	25	-1	1	-1	1	1	1	27	3.33688	30005
3	1	1	27	-1	1	-1	1	1	1	25	3.33688	30419
3	1	1	27	-1	1	-1	1	2	1	25	3.33688	30437
4	1	1	27	1	0	0	2	2	1	25	3.33688	42904
1	2	1	25	1	-1	1	3	1	1	27	3.33688	11555
2	2	1	25	-1	0	0	4	1	1	27	3.33688	23831
2	1	1	27	-1	0	0	4	1	1	25	3.33689	18098
4	1	1	25	1	0	0	2	1	1	27	3.33689	42408
2	1	1	27	-1	0	0	4	2	1	25	3.3369	18116
4	2	1	25	1	0	0	2	1	1	27	3.3369	48575
1	1	1	22	2	0	1	3	1	1	23	3.35207	4741
1	1	1	23	2	0	1	3	1	1	22	3.35207	4988
3	1	1	22	-2	0	-1	1	1	1	23	3.35207	29210
3	1	1	23	-2	0	-1	1	1	1	22	3.35207	29437
1	1	1	23	2	0	1	3	2	1	22	3.35207	5000
3	1	1	22	-2	0	-1	1	2	1	23	3.35207	29225
3	1	1	23	-2	0	-1	1	2	1	22	3.35207	29449
4	1	1	22	2	-1	0	2	2	1	23	3.35207	41740
1	2	1	22	2	0	1	3	1	1	23	3.35207	10908
1	2	1	23	2	0	1	3	1	1	22	3.35207	11155
2	2	1	23	-2	1	0	4	1	1	22	3.35207	23301
3	2	1	22	-2	0	-1	1	1	1	23	3.35207	35377
1	2	1	23	2	0	1	3	2	1	22	3.35207	11167
3	2	1	22	-2	0	-1	1	2	1	23	3.35207	35392
2	1	1	22	-2	1	0	4	1	1	23	3.35208	16892
2	1	1	23	-2	1	0	4	1	1	22	3.35208	17134
4	1	1	22	2	-1	0	2	1	1	23	3.35208	41725
4	1	1	23	2	-1	0	2	1	1	22	3.35208	41957
1	1	1	22	2	0	1	3	2	1	23	3.35208	4756
4	1	1	23	2	-1	0	2	2	1	22	3.35208	41969
2	2	1	22	-2	1	0	4	1	1	23	3.35208	23059
3	2	1	23	-2	0	-1	1	1	1	22	3.35208	35604
1	2	1	22	2	0	1	3	2	1	23	3.35208	10923
2	2	1	23	-2	1	0	4	2	1	22	3.35208	23313
3	2	1	23	-2	0	-1	1	2	1	22	3.35208	35616
4	2	1	22	2	-1	0	2	2	1	23	3.35208	47907
2	1	1	22	-2	1	0	4	2	1	23	3.35209	16907
2	1	1	23	-2	1	0	4	2	1	22	3.35209	17146
4	2	1	22	2	-1	0	2	1	1	23	3.35209	47892
4	2	1	23	2	-1	0	2	1	1	22	3.35209	48124
2	2	1	22	-2	1	0	4	2	1	23	3.35209	23074
4	2	1	23	2	-1	0	2	2	1	22	3.35209	48136
1	2	1	27	0	0	0	4	2	1	6	3.35326	11879
2	2	1	27	0	0	1	3	2	1	6	3.35326	24418
3	2	1	6	0	0	-1	2	2	1	27	3.35326	31957
4	2	1	6	0	0	0	1	2	1	27	3.35326	44127
3	1	1	6	0	0	-1	2	2	1	27	3.35327	25783
4	1	1	6	0	0	0	1	2	1	27	3.35327	37953
1	2	1	27	0	0	0	4	1	1	6	3.35327	11865
2	2	1	27	0	0	1	3	1	1	6	3.35327	24404
1	1	1	6	0	0	1	4	2	1	27	3.35328	957
2	1	1	6	0	0	0	3	2	1	27	3.35328	13453
3	2	1	27	0	0	0	2	1	1	6	3.35328	36743
4	2	1	27	0	0	-1	1	1	1	6	3.35328	48870
1	2	1	6	0	0	1	4	2	1	27	3.35328	7131
2	2	1	6	0	0	0	3	2	1	27	3.35328	19627
3	2	1	27	0	0	0	2	2	1	6	3.35328	36757
4	2	1	27	0	0	-1	1	2	1	6	3.35328	48884
1	1	1	15	0	0	0	4	1	1	24	3.35486	2970
4	1	1	24	0	0	0	1	1	1	15	3.35486	42019
1	1	1	15	0	0	0	4	2	1	24	3.35486	2984
4	1	1	24	0	0	0	1	2	1	15	3.35486	42044
1	2	1	15	0	0	0	4	1	1	24	3.35486	9144
4	2	1	24	0	0	0	1	1	1	15	3.35486	48186
1	2	1	15	0	0	0	4	2	1	24	3.35486	9158
4	2	1	24	0	0	0	1	2	1	15	3.35486	48211
2	1	1	15	0	0	1	3	2	1	24	3.35487	15438
3	1	1	15	0	0	0	2	2	1	24	3.35487	27770
2	2	1	24	0	0	0	3	1	1	15	3.35487	23713
3	2	1	24	0	0	-1	2	1	1	15	3.35487	36044
1	1	1	24	0	0	1	4	1	1	15	3.35488	5022
2	1	1	15	0	0	1	3	1	1	24	3.35488	15424
2	1	1	24	0	0	0	3	1	1	15	3.35488	17546
3	1	1	15	0	0	0	2	1	1	24	3.35488	27756
3	1	1	24	0	0	-1	2	1	1	15	3.35488	29877
4	1	1	15	0	0	-1	1	1	1	24	3.35488	39968
4	1	1	15	0	0	-1	1	2	1	24	3.35488	39982
1	2	1	24	0	0	1	4	1	1	15	3.35488	11189
2	2	1	15	0	0	1	3	2	1	24	3.35488	21612
2	2	1	24	0	0	0	3	2	1	15	3.35488	23738
3	2	1	15	0	0	0	2	2	1	24	3.35488	33944
3	2	1	24	0	0	-1	2	2	1	15	3.35488	36069
1	1	1	24	0	0	1	4	2	1	15	3.35489	5047
2	1	1	24	0	0	0	3	2	1	15	3.35489	17571
3	1	1	24	0	0	-1	2	2	1	15	3.35489	29902
2	2	1	15	0	0	1	3	1	1	24	3.35489	21598
3	2	1	15	0	0	0	2	1	1	24	3.35489	33930
4	2	1	15	0	0	-1	1	1	1	24	3.35489	46142
1	2	1	24	0	0	1	4	2	1	15	3.35489	11214
4	2	1	15	0	0	-1	1	2	1	24	3.35489	46156
2	1	1	17	1	0	0	2	1	1	21	3.36403	15902
2	1	1	21	-1	0	0	2	1	1	17	3.36403	16709
2	1	1	21	-1	0	0	2	2	1	17	3.36403	16725
2	2	1	17	1	0	0	2	1	1	21	3.36403	22076
1	1	1	17	-1	0	0	1	1	1	21	3.36404	3384
1	1	1	21	1	0	0	1	1	1	17	3.36404	4373
3	1	1	17	1	0	0	3	1	1	21	3.36404	28268
3	1	1	21	-1	0	0	3	1	1	17	3.36404	29079
1	1	1	21	1	0	0	1	2	1	17	3.36404	4389
1	2	1	17	-1	0	0	1	1	1	21	3.36404	9558
3	1	1	21	-1	0	0	3	2	1	17	3.36405	29095
3	2	1	17	1	0	0	3	1	1	21	3.36405	34442
4	1	1	21	1	0	0	4	2	1	17	3.36406	41491
4	2	1	17	-1	0	0	4	1	1	21	3.36406	46590
4	1	1	17	-1	0	0	4	1	1	21	3.36408	40416
4	1	1	21	1	0	0	4	1	1	17	3.36408	41475
2	1	1	23	-1	0	0	2	1	1	26	3.36412	17182
2	1	1	26	1	0	0	2	1	1	23	3.36412	18004
2	1	1	26	1	0	0	2	2	1	23	3.36413	18020
2	2	1	23	-1	0	0	2	1	1	26	3.36413	23349
1	1	1	23	1	0	0	1	1	1	26	3.36414	4847
1	1	1	26	-1	0	0	1	1	1	23	3.36414	5492
3	1	1	23	-1	0	0	3	1	1	26	3.36414	29582
3	1	1	26	1	0	0	3	1	1	23	3.36414	30350
1	1	1	26	-1	0	0	1	2	1	23	3.36414	5508
1	2	1	23	1	0	0	1	1	1	26	3.36414	11014
3	1	1	26	1	0	0	3	2	1	23	3.36416	30366
3	2	1	23	-1	0	0	3	1	1	26	3.36416	35749
4	1	1	23	1	0	0	4	1	1	26	3.36418	41929
4	1	1	26	-1	0	0	4	1	1	23	3.36418	42504
4	1	1	26	-1	0	0	4	2	1	23	3.36418	42520
4	2	1	23	1	0	0	4	1	1	26	3.36418	48096
2	1	1	23	-1	0	0	2	2	1	20	3.37619	17197
2	2	1	20	1	0	0	2	1	1	23	3.37619	22785
2	2	1	20	1	0	0	2	2	1	23	3.3762	22798
2	2	1	23	-1	0	0	2	2	1	20	3.3762	23364
1	1	1	23	1	0	0	1	2	1	20	3.37621	4862
3	1	1	23	-1	0	0	3	2	1	20	3.37621	29597
1	2	1	20	-1	0	0	1	1	1	23	3.37621	10272
3	2	1	20	1	0	0	3	1	1	23	3.37621	35129
1	2	1	20	-1	0	0	1	2	1	23	3.37621	10285
1	2	1	23	1	0	0	1	2	1	20	3.37621	11029
4	1	1	23	1	0	0	4	2	1	20	3.37622	41944
4	2	1	20	-1	0	0	4	1	1	23	3.37622	47282
4	2	1	20	-1	0	0	4	2	1	23	3.37622	47295
4	2	1	23	1	0	0	4	2	1	20	3.37622	48111
3	2	1	20	1	0	0	3	2	1	23	3.37623	35142
3	2	1	23	-1	0	0	3	2	1	20	3.37623	35764
1	1	1	9	1	-1	0	2	2	1	28	3.40713	1696
2	2	1	28	-1	1	0	1	1	1	9	3.40713	24509
1	2	1	9	1	-1	0	2	2	1	28	3.40713	7870
2	2	1	28	-1	1	0	1	2	1	9	3.40713	24534
2	1	1	9	-1	0	0	1	2	1	28	3.40714	13925
3	1	1	9	-1	1	0	4	2	1	28	3.40714	26339
4	1	1	9	1	0	0	3	2	1	28	3.40714	38771
1	2	1	28	1	0	0	2	1	1	9	3.40714	12204
3	2	1	28	-1	0	0	4	1	1	9	3.40714	36886
4	2	1	28	1	-1	0	3	1	1	9	3.40714	49217
1	2	1	28	1	0	0	2	2	1	9	3.40714	12229
2	2	1	9	-1	0	0	1	2	1	28	3.40714	20099
3	2	1	9	-1	1	0	4	2	1	28	3.40714	32513
4	2	1	28	1	-1	0	3	2	1	9	3.40714	49242
3	2	1	28	-1	0	0	4	2	1	9	3.40715	36911
4	2	1	9	1	0	0	3	2	1	28	3.40715	44945
1	1	1	18	1	0	0	2	1	1	22	3.41207	3796
2	1	1	22	-1	0	0	1	1	1	18	3.41207	16918
2	1	1	22	-1	0	0	1	2	1	18	3.41207	16926
1	2	1	18	1	0	0	2	1	1	22	3.41207	9970
1	1	1	18	1	0	0	2	2	1	22	3.41208	3821
3	1	1	18	-1	0	0	4	2	1	22	3.41208	28371
3	1	1	22	-1	1	0	4	2	1	18	3.41208	29406
2	2	1	22	-1	0	0	1	1	1	18	3.41208	23085
4	2	1	18	1	-1	0	3	1	1	22	3.41208	46991
4	2	1	22	1	0	0	3	1	1	18	3.41208	47831
1	2	1	18	1	0	0	2	2	1	22	3.41208	9995
2	2	1	22	-1	0	0	1	2	1	18	3.41208	23093
3	2	1	18	-1	0	0	4	2	1	22	3.41208	34545
4	2	1	22	1	0	0	3	2	1	18	3.41208	47839
1	1	1	22	1	-1	0	2	1	1	18	3.41209	4555
2	1	1	18	-1	1	0	1	1	1	22	3.41209	15989
3	1	1	22	-1	1	0	4	1	1	18	3.41209	29398
4	1	1	18	1	-1	0	3	1	1	22	3.41209	40817
1	1	1	22	1	-1	0	2	2	1	18	3.41209	4563
2	1	1	18	-1	1	0	1	2	1	22	3.41209	16014
4	1	1	22	1	0	0	3	2	1	18	3.41209	41672
1	2	1	22	1	-1	0	2	1	1	18	3.41209	10722
2	2	1	18	-1	1	0	1	1	1	22	3.41209	22163
3	2	1	18	-1	0	0	4	1	1	22	3.41209	34520
1	2	1	22	1	-1	0	2	2	1	18	3.41209	10730
2	2	1	18	-1	1	0	1	2	1	22	3.41209	22188
3	2	1	22	-1	1	0	4	2	1	18	3.41209	35573
4	2	1	18	1	-1	0	3	2	1	22	3.41209	47016
3	1	1	18	-1	0	0	4	1	1	22	3.4121	28346
4	1	1	22	1	0	0	3	1	1	18	3.4121	41664
4	1	1	18	1	-1	0	3	2	1	22	3.4121	40842
3	2	1	22	-1	1	0	4	1	1	18	3.4121	35565
2	1	1	24	-1	0	0	3	1	1	12	3.41789	17426
3	1	1	12	1	0	0	2	1	1	24	3.41789	27108
2	1	1	12	1	0	1	3	1	1	24	3.4179	14797
3	1	1	24	-1	0	-1	2	1	1	12	3.4179	29747
1	1	1	24	1	0	1	4	2	1	12	3.4179	5210
2	1	1	24	-1	0	0	3	2	1	12	3.4179	17441
3	1	1	12	1	0	0	2	2	1	24	3.4179	27118
3	1	1	24	-1	0	-1	2	2	1	12	3.4179	29762
2	2	1	12	1	0	1	3	1	1	24	3.4179	20971
2	2	1	24	-1	0	0	3	1	1	12	3.4179	23593
3	2	1	12	1	0	0	2	1	1	24	3.4179	33282
4	2	1	12	-1	0	-1	1	1	1	24	3.4179	45430
1	2	1	24	1	0	1	4	2	1	12	3.4179	11377
2	2	1	12	1	0	1	3	2	1	24	3.4179	20981
2	2	1	24	-1	0	0	3	2	1	12	3.4179	23608
3	2	1	12	1	0	0	2	2	1	24	3.4179	33292
3	2	1	24	-1	0	-1	2	2	1	12	3.4179	35929
4	2	1	12	-1	0	-1	1	2	1	24	3.4179	45440
1	1	1	12	-1	0	0	4	1	1	24	3.41791	2279
1	1	1	24	1	0	1	4	1	1	12	3.41791	5195
4	1	1	12	-1	0	-1	1	1	1	24	3.41791	39256
4	1	1	24	1	0	0	1	1	1	12	3.41791	42106
2	1	1	12	1	0	1	3	2	1	24	3.41791	14807
4	1	1	12	-1	0	-1	1	2	1	24	3.41791	39266
4	1	1	24	1	0	0	1	2	1	12	3.41791	42121
1	2	1	12	-1	0	0	4	1	1	24	3.41791	8453
1	2	1	24	1	0	1	4	1	1	12	3.41791	11362
3	2	1	24	-1	0	-1	2	1	1	12	3.41791	35914
1	1	1	12	-1	0	0	4	2	1	24	3.41792	2289
4	2	1	24	1	0	0	1	1	1	12	3.41792	48273
1	2	1	12	-1	0	0	4	2	1	24	3.41792	8463
4	2	1	24	1	0	0	1	2	1	12	3.41792	48288
1	1	1	17	-1	0	0	1	2	1	21	3.42753	3399
2	1	1	17	1	0	0	2	2	1	21	3.42753	15917
1	2	1	21	1	0	0	1	1	1	17	3.42753	10543
2	2	1	21	-1	0	0	2	1	1	17	3.42753	22879
1	2	1	17	-1	0	0	1	2	1	21	3.42753	9573
1	2	1	21	1	0	0	1	2	1	17	3.42753	10558
2	2	1	17	1	0	0	2	2	1	21	3.42753	22091
2	2	1	21	-1	0	0	2	2	1	17	3.42753	22894
4	2	1	17	-1	0	0	4	2	1	21	3.42754	46605
3	1	1	17	1	0	0	3	2	1	21	3.42755	28283
3	2	1	21	-1	0	0	3	1	1	17	3.42755	35249
4	2	1	21	1	0	0	4	2	1	17	3.42755	47660
3	2	1	17	1	0	0	3	2	1	21	3.42756	34457
3	2	1	21	-1	0	0	3	2	1	17	3.42756	35264
4	1	1	17	-1	0	0	4	2	1	21	3.42757	40431
4	2	1	21	1	0	0	4	1	1	17	3.42757	47645
2	1	1	4	-1	0	0	2	1	1	26	3.4277	12835
2	1	1	26	1	0	0	2	1	1	4	3.4277	17993
3	1	1	4	-1	0	0	3	1	1	26	3.42771	25222
3	1	1	26	1	0	0	3	1	1	4	3.42771	30339
2	1	1	26	1	0	0	2	2	1	4	3.42771	18009
2	2	1	4	-1	0	0	2	1	1	26	3.42771	19009
1	1	1	4	1	0	0	1	1	1	26	3.42772	516
1	1	1	26	-1	0	0	1	1	1	4	3.42772	5481
1	1	1	26	-1	0	0	1	2	1	4	3.42772	5497
1	2	1	4	1	0	0	1	1	1	26	3.42772	6690
3	1	1	26	1	0	0	3	2	1	4	3.42773	30355
3	2	1	4	-1	0	0	3	1	1	26	3.42773	31396
4	1	1	4	1	0	0	4	1	1	26	3.42774	37609
4	1	1	26	-1	0	0	4	1	1	4	3.42774	42493
4	1	1	26	-1	0	0	4	2	1	4	3.42774	42509
4	2	1	4	1	0	0	4	1	1	26	3.42774	43783
2	1	1	27	0	0	0	3	1	1	13	3.42858	18188
3	1	1	13	0	0	0	2	1	1	27	3.42858	27291
1	1	1	27	0	0	1	4	1	1	13	3.42859	5820
4	1	1	13	0	0	-1	1	1	1	27	3.42859	39574
2	1	1	27	0	0	0	3	2	1	13	3.42859	18202
3	2	1	13	0	0	0	2	1	1	27	3.42859	33465
1	1	1	13	0	0	0	4	1	1	27	3.4286	2576
2	1	1	13	0	0	1	3	1	1	27	3.4286	14947
3	1	1	27	0	0	-1	2	1	1	13	3.4286	30482
4	1	1	27	0	0	0	1	1	1	13	3.4286	42767
1	1	1	27	0	0	1	4	2	1	13	3.4286	5834
3	1	1	27	0	0	-1	2	2	1	13	3.4286	30496
4	1	1	27	0	0	0	1	2	1	13	3.4286	42781
1	2	1	13	0	0	0	4	1	1	27	3.4286	8750
2	2	1	13	0	0	1	3	1	1	27	3.4286	21121
4	2	1	13	0	0	-1	1	1	1	27	3.4286	45748
1	1	1	20	1	-1	0	2	2	1	27	3.43783	4243
2	1	1	20	-1	0	0	1	2	1	27	3.43783	16444
4	1	1	20	1	0	0	3	2	1	27	3.43783	41308
1	2	1	27	1	0	0	2	1	1	20	3.43783	11968
2	2	1	27	-1	1	0	1	1	1	20	3.43783	24318
3	2	1	27	-1	0	0	4	1	1	20	3.43783	36679
3	1	1	20	-1	1	0	4	2	1	27	3.43784	28843
4	2	1	27	1	-1	0	3	1	1	20	3.43784	48963
2	1	1	20	1	0	0	2	1	1	23	3.43865	16613
2	1	1	23	-1	0	0	2	1	1	20	3.43865	17179
1	1	1	20	-1	0	0	1	1	1	23	3.43866	4097
1	1	1	23	1	0	0	1	1	1	20	3.43866	4844
3	1	1	20	1	0	0	3	1	1	23	3.43866	28957
3	1	1	23	-1	0	0	3	1	1	20	3.43866	29579
1	1	1	20	-1	0	0	1	2	1	23	3.43866	4109
2	1	1	20	1	0	0	2	2	1	23	3.43866	16625
1	2	1	23	1	0	0	1	1	1	20	3.43866	11011
2	2	1	23	-1	0	0	2	1	1	20	3.43866	23346
3	1	1	20	1	0	0	3	2	1	23	3.43868	28969
3	2	1	23	-1	0	0	3	1	1	20	3.43868	35746
4	1	1	20	-1	0	0	4	2	1	23	3.43869	41119
4	2	1	23	1	0	0	4	1	1	20	3.43869	48093
4	1	1	20	-1	0	0	4	1	1	23	3.4387	41107
4	1	1	23	1	0	0	4	1	1	20	3.4387	41926
1	1	1	14	0	0	0	4	2	1	24	3.44376	2778
4	2	1	24	0	0	0	1	1	1	14	3.44376	48185
1	2	1	14	0	0	0	4	2	1	24	3.44376	8952
4	2	1	24	0	0	0	1	2	1	14	3.44376	48210
1	1	1	14	0	0	0	4	1	1	24	3.44377	2763
4	1	1	24	0	0	0	1	1	1	14	3.44377	42018
2	1	1	14	0	0	1	3	2	1	24	3.44377	15204
4	1	1	24	0	0	0	1	2	1	14	3.44377	42043
1	2	1	14	0	0	0	4	1	1	24	3.44377	8937
3	2	1	24	0	0	-1	2	1	1	14	3.44377	36043
1	1	1	24	0	0	1	4	1	1	14	3.44378	5021
2	1	1	14	0	0	1	3	1	1	24	3.44378	15189
2	1	1	24	0	0	0	3	1	1	14	3.44378	17545
3	1	1	14	0	0	0	2	1	1	24	3.44378	27532
3	1	1	24	0	0	-1	2	1	1	14	3.44378	29876
4	1	1	14	0	0	-1	1	1	1	24	3.44378	39766
3	1	1	14	0	0	0	2	2	1	24	3.44378	27547
4	1	1	14	0	0	-1	1	2	1	24	3.44378	39781
1	2	1	24	0	0	1	4	1	1	14	3.44378	11188
2	2	1	24	0	0	0	3	1	1	14	3.44378	23712
1	2	1	24	0	0	1	4	2	1	14	3.44378	11213
2	2	1	14	0	0	1	3	2	1	24	3.44378	21378
3	2	1	24	0	0	-1	2	2	1	14	3.44378	36068
4	2	1	14	0	0	-1	1	2	1	24	3.44378	45955
1	1	1	24	0	0	1	4	2	1	14	3.44379	5046
2	1	1	24	0	0	0	3	2	1	14	3.44379	17570
3	1	1	24	0	0	-1	2	2	1	14	3.44379	29901
2	2	1	14	0	0	1	3	1	1	24	3.44379	21363
3	2	1	14	0	0	0	2	1	1	24	3.44379	33706
4	2	1	14	0	0	-1	1	1	1	24	3.44379	45940
2	2	1	24	0	0	0	3	2	1	14	3.44379	23737
3	2	1	14	0	0	0	2	2	1	24	3.44379	33721
3	1	1	18	0	0	0	4	2	1	20	3.44658	28487
4	2	1	20	0	0	0	3	1	1	18	3.44658	47378
3	2	1	18	0	0	0	4	2	1	20	3.44659	34661
4	2	1	20	0	0	0	3	2	1	18	3.44659	47388
1	1	1	18	0	0	0	2	2	1	20	3.4466	3690
2	1	1	18	0	1	0	1	2	1	20	3.4466	16110
1	2	1	20	0	-1	0	2	1	1	18	3.4466	10315
2	2	1	20	0	0	0	1	1	1	18	3.4466	22694
1	2	1	18	0	0	0	2	2	1	20	3.4466	9864
1	2	1	20	0	-1	0	2	2	1	18	3.4466	10325
2	2	1	18	0	1	0	1	2	1	20	3.4466	22284
2	2	1	20	0	0	0	1	2	1	18	3.4466	22704
3	2	1	20	0	1	0	4	2	1	18	3.4466	35104
4	2	1	18	0	-1	0	3	2	1	20	3.4466	46905
4	1	1	18	0	-1	0	3	2	1	20	3.44661	40731
3	2	1	20	0	1	0	4	1	1	18	3.44661	35094
1	1	1	25	1	-1	1	3	1	1	25	3.44704	5386
3	1	1	25	-1	1	-1	1	1	1	25	3.44704	30003
1	1	1	25	1	-1	1	3	2	1	25	3.44704	5406
3	1	1	25	-1	1	-1	1	2	1	25	3.44704	30023
1	2	1	25	1	-1	1	3	1	1	25	3.44704	11553
3	2	1	25	-1	1	-1	1	1	1	25	3.44704	36170
1	2	1	25	1	-1	1	3	2	1	25	3.44704	11573
3	2	1	25	-1	1	-1	1	2	1	25	3.44704	36190
2	1	1	25	-1	0	0	4	1	1	25	3.44705	17662
4	1	1	25	1	0	0	2	1	1	25	3.44705	42406
2	1	1	25	-1	0	0	4	2	1	25	3.44706	17682
4	1	1	25	1	0	0	2	2	1	25	3.44706	42426
2	2	1	25	-1	0	0	4	1	1	25	3.44706	23829
4	2	1	25	1	0	0	2	1	1	25	3.44706	48573
2	2	1	25	-1	0	0	4	2	1	25	3.44707	23849
4	2	1	25	1	0	0	2	2	1	25	3.44707	48593
1	1	1	28	0	0	1	4	1	1	18	3.44783	6058
2	1	1	28	0	0	0	3	1	1	18	3.44783	18400
3	1	1	18	0	0	0	2	1	1	28	3.44783	28449
4	1	1	18	0	0	-1	1	1	1	28	3.44783	40749
1	1	1	18	0	0	0	4	1	1	28	3.44784	3720
2	1	1	18	0	0	1	3	1	1	28	3.44784	16072
3	1	1	28	0	0	-1	2	1	1	18	3.44784	30739
4	1	1	28	0	0	0	1	1	1	18	3.44784	43028
1	1	1	28	0	0	1	4	2	1	18	3.44784	6077
2	1	1	28	0	0	0	3	2	1	18	3.44784	18419
3	1	1	28	0	0	-1	2	2	1	18	3.44784	30758
4	1	1	28	0	0	0	1	2	1	18	3.44784	43047
1	2	1	18	0	0	0	4	1	1	28	3.44784	9894
2	2	1	18	0	0	1	3	1	1	28	3.44784	22246
3	2	1	18	0	0	0	2	1	1	28	3.44784	34623
4	2	1	18	0	0	-1	1	1	1	28	3.44784	46923
4	2	1	11	-1	0	0	4	2	1	27	3.45202	45228
4	2	1	27	1	0	0	4	2	1	11	3.45202	49047
1	1	1	11	-1	0	0	1	2	1	27	3.45203	2035
2	1	1	11	1	0	0	2	2	1	27	3.45203	14557
3	1	1	11	1	0	0	3	2	1	27	3.45203	26910
1	2	1	27	1	0	0	1	1	1	11	3.45203	11923
2	2	1	27	-1	0	0	2	1	1	11	3.45203	24266
3	2	1	27	-1	0	0	3	1	1	11	3.45203	36634
1	2	1	11	-1	0	0	1	2	1	27	3.45203	8209
1	2	1	27	1	0	0	1	2	1	11	3.45203	11940
2	2	1	11	1	0	0	2	2	1	27	3.45203	20731
2	2	1	27	-1	0	0	2	2	1	11	3.45203	24283
4	1	1	11	-1	0	0	4	2	1	27	3.45204	39054
4	2	1	27	1	0	0	4	1	1	11	3.45204	49030
3	2	1	11	1	0	0	3	2	1	27	3.45204	33084
3	2	1	27	-1	0	0	3	2	1	11	3.45204	36651
2	2	1	26	-1	1	0	4	2	1	25	3.45581	24160
4	2	1	25	1	-1	0	2	2	1	26	3.45581	48537
1	1	1	25	1	0	1	3	2	1	26	3.45582	5458
2	1	1	25	-1	1	0	4	2	1	26	3.45582	17727
3	1	1	25	-1	0	-1	1	2	1	26	3.45582	29960
4	1	1	25	1	-1	0	2	2	1	26	3.45582	42370
1	2	1	26	1	0	1	3	1	1	25	3.45582	11782
2	2	1	26	-1	1	0	4	1	1	25	3.45582	24134
3	2	1	26	-1	0	-1	1	1	1	25	3.45582	36378
4	2	1	26	1	-1	0	2	1	1	25	3.45582	48702
1	2	1	25	1	0	1	3	2	1	26	3.45582	11625
2	2	1	25	-1	1	0	4	2	1	26	3.45582	23894
3	2	1	26	-1	0	-1	1	2	1	25	3.45582	36404
4	2	1	26	1	-1	0	2	2	1	25	3.45582	48728
1	2	1	26	1	0	1	3	2	1	25	3.45583	11808
3	2	1	25	-1	0	-1	1	2	1	26	3.45583	36127
1	1	1	19	1	0	0	2	1	1	15	3.46333	3986
2	1	1	15	-1	0	0	1	1	1	19	3.46333	15270
4	1	1	15	1	0	0	3	2	1	19	3.46333	40123
3	2	1	19	-1	0	0	4	1	1	15	3.46333	34790
3	2	1	19	-1	0	0	4	2	1	15	3.46333	34817
4	2	1	15	1	0	0	3	2	1	19	3.46333	46297
1	1	1	15	1	-1	0	2	1	1	19	3.46334	3003
[truncated: 47,333 more rows]
