# Supplementary material for: A Process for Modelling Diffuse Scattering from Disordered Molecular Crystals, Illustrated by Application to Monoclinic 9-Chloro-10-methylanthracene
Source: Hindawi journal article supplement (doi:10.1155/2015/878463), 2015-01-01
Supplement: f2 [file 878463.f2.zip › 878463.f2/CMA_simulations/CMA_contacts_grouped]

 ol	oz	om	oat	da	db	dc	dl	dz	dm	dat	length	type                                                      
  4  1  1 24  0  0  0  1  2  1 27   2.2826       2
  1  2  1 27  0  0  0  4  1  1 24   2.2826       3
  1  2  1 27  0  0  0  4  2  1 24   2.2826       4
  2  2  1 27  0  0  1  3  2  1 24   2.2826       4
  3  2  1 24  0  0 -1  2  2  1 27   2.2826       4
  4  2  1 24  0  0  0  1  2  1 27   2.2826       4
  1  1  1 24  0  0  1  4  2  1 27   2.2826       2
  3  1  1 24  0  0 -1  2  2  1 27   2.2826       2
  2  2  1 27  0  0  1  3  1  1 24   2.2826       3
  4  2  1 27  0  0 -1  1  1  1 24   2.2826       3
  1  2  1 24  0  0  1  4  2  1 27   2.2826       4
  4  2  1 27  0  0 -1  1  2  1 24   2.2826       4
  2  1  1 24  0  0  0  3  2  1 27   2.2826       2
  3  2  1 27  0  0  0  2  1  1 24   2.2826       3
  2  2  1 24  0  0  0  3  2  1 27   2.2826       4
  3  2  1 27  0  0  0  2  2  1 24   2.2826       4
  1  1  1 28  1  0  1  3  2  1 26   2.2964       6
  3  2  1 26 -1  0 -1  1  1  1 28   2.2964       7
  4  2  1 26  1 -1  0  2  1  1 28   2.2964       7
  2  1  1 28 -1  1  0  4  2  1 26   2.2964       6
  3  1  1 28 -1  0 -1  1  2  1 26   2.2964       6
  1  2  1 26  1  0  1  3  1  1 28   2.2964       7
  4  1  1 28  1 -1  0  2  2  1 26   2.2964       6
  2  2  1 26 -1  1  0  4  1  1 28   2.2964       7
  4  1  1 22  2 -1  0  2  2  1 22   2.3824      10
  2  2  1 22 -2  1  0  4  1  1 22   2.3824      11
  1  1  1 22  2  0  1  3  1  1 22   2.3824       9
  2  1  1 22 -2  1  0  4  1  1 22   2.3824       9
  3  1  1 22 -2  0 -1  1  1  1 22   2.3824       9
  4  1  1 22  2 -1  0  2  1  1 22   2.3824       9
  1  1  1 22  2  0  1  3  2  1 22   2.3824      10
  3  1  1 22 -2  0 -1  1  2  1 22   2.3824      10
  1  2  1 22  2  0  1  3  1  1 22   2.3824      11
  3  2  1 22 -2  0 -1  1  1  1 22   2.3824      11
  1  2  1 22  2  0  1  3  2  1 22   2.3824      12
  3  2  1 22 -2  0 -1  1  2  1 22   2.3824      12
  2  1  1 22 -2  1  0  4  2  1 22   2.3824      10
  4  2  1 22  2 -1  0  2  1  1 22   2.3824      11
  2  2  1 22 -2  1  0  4  2  1 22   2.3824      12
  4  2  1 22  2 -1  0  2  2  1 22   2.3824      12
  1  1  1 23  2  0  1  3  2  1 26   2.4245      14
  2  1  1 23 -2  1  0  4  2  1 26   2.4245      14
  3  1  1 23 -2  0 -1  1  2  1 26   2.4245      14
  1  2  1 26  2  0  1  3  1  1 23   2.4245      15
  3  2  1 26 -2  0 -1  1  1  1 23   2.4245      15
  4  2  1 26  2 -1  0  2  1  1 23   2.4245      15
  1  2  1 23  2  0  1  3  2  1 26   2.4245      16
  2  2  1 23 -2  1  0  4  2  1 26   2.4245      16
  3  2  1 26 -2  0 -1  1  2  1 23   2.4245      16
  4  2  1 26  2 -1  0  2  2  1 23   2.4245      16
  4  1  1 23  2 -1  0  2  2  1 26   2.4245      14
  2  2  1 26 -2  1  0  4  1  1 23   2.4245      15
  1  2  1 26  2  0  1  3  2  1 23   2.4245      16
  3  2  1 23 -2  0 -1  1  2  1 26   2.4245      16
  2  2  1 26 -2  1  0  4  2  1 23   2.4246      16
  4  2  1 23  2 -1  0  2  2  1 26   2.4246      16
  2  1  1 24 -1  0  0  3  1  1 17   2.5025      17
  3  1  1 17  1  0  0  2  1  1 24   2.5025      17
  3  1  1 24 -1  0 -1  2  2  1 17   2.5025      18
  2  2  1 17  1  0  1  3  1  1 24   2.5025      19
  1  1  1 24  1  0  1  4  1  1 17   2.5025      17
  2  1  1 17  1  0  1  3  1  1 24   2.5025      17
  3  1  1 24 -1  0 -1  2  1  1 17   2.5025      17
  4  1  1 17 -1  0 -1  1  1  1 24   2.5025      17
  1  1  1 24  1  0  1  4  2  1 17   2.5025      18
  2  1  1 17  1  0  1  3  2  1 24   2.5025      18
  2  1  1 24 -1  0  0  3  2  1 17   2.5025      18
  3  1  1 17  1  0  0  2  2  1 24   2.5025      18
  2  2  1 24 -1  0  0  3  1  1 17   2.5025      19
  3  2  1 17  1  0  0  2  1  1 24   2.5025      19
  3  2  1 24 -1  0 -1  2  1  1 17   2.5025      19
  4  2  1 17 -1  0 -1  1  1  1 24   2.5025      19
  1  2  1 24  1  0  1  4  2  1 17   2.5025      20
  2  2  1 17  1  0  1  3  2  1 24   2.5025      20
  2  2  1 24 -1  0  0  3  2  1 17   2.5025      20
  3  2  1 17  1  0  0  2  2  1 24   2.5025      20
  3  2  1 24 -1  0 -1  2  2  1 17   2.5025      20
  4  2  1 17 -1  0 -1  1  2  1 24   2.5025      20
  1  1  1 17 -1  0  0  4  1  1 24   2.5025      17
  4  1  1 24  1  0  0  1  1  1 17   2.5025      17
  4  1  1 17 -1  0 -1  1  2  1 24   2.5025      18
  4  1  1 24  1  0  0  1  2  1 17   2.5025      18
  1  2  1 17 -1  0  0  4  1  1 24   2.5025      19
  1  2  1 24  1  0  1  4  1  1 17   2.5025      19
  1  1  1 17 -1  0  0  4  2  1 24   2.5025      18
  4  2  1 24  1  0  0  1  1  1 17   2.5025      19
  1  2  1 17 -1  0  0  4  2  1 24   2.5025      20
  4  2  1 24  1  0  0  1  2  1 17   2.5025      20
  3  1  1 17  0  0  0  4  1  1 26   2.5119      21
  4  1  1 26  0  0  0  3  1  1 17   2.5119      21
  4  1  1 26  0  0  0  3  2  1 17   2.5119      22
  3  2  1 17  0  0  0  4  1  1 26   2.5119      23
  1  1  1 26  0 -1  0  2  1  1 17   2.5119      21
  2  1  1 17  0  1  0  1  1  1 26   2.5119      21
  3  1  1 26  0  1  0  4  2  1 17   2.5119      22
  4  2  1 17  0 -1  0  3  1  1 26   2.5119      23
  1  1  1 17  0  0  0  2  1  1 26   2.5119      21
  2  1  1 26  0  0  0  1  1  1 17   2.5119      21
  3  1  1 26  0  1  0  4  1  1 17   2.5119      21
  4  1  1 17  0 -1  0  3  1  1 26   2.5119      21
  1  1  1 26  0 -1  0  2  2  1 17   2.5119      22
  2  1  1 26  0  0  0  1  2  1 17   2.5119      22
  1  2  1 17  0  0  0  2  1  1 26   2.5119      23
  2  2  1 17  0  1  0  1  1  1 26   2.5119      23
  1  1  1 18  0  0  0  2  1  1 26   2.6028      25
  2  1  1 26  0  0  0  1  1  1 18   2.6028      25
  3  1  1 18  0  0  0  4  1  1 26   2.6028      25
  4  1  1 26  0  0  0  3  1  1 18   2.6028      25
  1  1  1 26  0 -1  0  2  2  1 18   2.6028      26
  2  1  1 26  0  0  0  1  2  1 18   2.6028      26
  1  2  1 18  0  0  0  2  1  1 26   2.6028      27
  2  2  1 18  0  1  0  1  1  1 26   2.6028      27
  1  1  1 26  0 -1  0  2  1  1 18   2.6028      25
  2  1  1 18  0  1  0  1  1  1 26   2.6028      25
  3  1  1 26  0  1  0  4  2  1 18   2.6028      26
  4  1  1 26  0  0  0  3  2  1 18   2.6028      26
  3  2  1 18  0  0  0  4  1  1 26   2.6028      27
  4  2  1 18  0 -1  0  3  1  1 26   2.6028      27
  3  1  1 26  0  1  0  4  1  1 18   2.6028      25
  4  1  1 18  0 -1  0  3  1  1 26   2.6028      25
  1  1  1 17 -1  0  0  1  2  1 27   2.6062      26
  2  1  1 17  1  0  0  2  2  1 27   2.6062      26
  1  2  1 27  1  0  0  1  1  1 17   2.6062      27
  2  2  1 27 -1  0  0  2  1  1 17   2.6062      27
  1  2  1 17 -1  0  0  1  2  1 27   2.6062      28
  1  2  1 27  1  0  0  1  2  1 17   2.6062      28
  2  2  1 17  1  0  0  2  2  1 27   2.6062      28
  2  2  1 27 -1  0  0  2  2  1 17   2.6062      28
  4  2  1 17 -1  0  0  4  2  1 27   2.6062      28
  4  2  1 27  1  0  0  4  2  1 17   2.6062      28
  3  1  1 17  1  0  0  3  2  1 27   2.6063      26
  3  2  1 27 -1  0  0  3  1  1 17   2.6063      27
  3  2  1 17  1  0  0  3  2  1 27   2.6063      28
  3  2  1 27 -1  0  0  3  2  1 17   2.6063      28
  4  1  1 17 -1  0  0  4  2  1 27   2.6063      26
  4  2  1 27  1  0  0  4  1  1 17   2.6063      27
  3  1  1 17  0  0  0  4  1  1 27   2.6336      29
  4  1  1 27  0  0  0  3  1  1 17   2.6336      29
  3  1  1 27  0  1  0  4  2  1 17   2.6336      30
  4  2  1 17  0 -1  0  3  1  1 27   2.6336      31
  1  1  1 17  0  0  0  2  1  1 27   2.6337      29
  1  1  1 27  0 -1  0  2  1  1 17   2.6337      29
  2  1  1 17  0  1  0  1  1  1 27   2.6337      29
  2  1  1 27  0  0  0  1  1  1 17   2.6337      29
  3  1  1 27  0  1  0  4  1  1 17   2.6337      29
  4  1  1 17  0 -1  0  3  1  1 27   2.6337      29
  1  1  1 27  0 -1  0  2  2  1 17   2.6337      30
  2  1  1 27  0  0  0  1  2  1 17   2.6337      30
  4  1  1 27  0  0  0  3  2  1 17   2.6337      30
  1  2  1 17  0  0  0  2  1  1 27   2.6337      31
  2  2  1 17  0  1  0  1  1  1 27   2.6337      31
  3  2  1 17  0  0  0  4  1  1 27   2.6337      31
  2  1  1 24 -1  0  0  4  1  1 27   2.6561      33
  4  1  1 27  1  0  0  2  1  1 24   2.6561      33
  1  1  1 24  1 -1  1  3  1  1 27   2.6561      33
  1  1  1 27  1 -1  1  3  1  1 24   2.6561      33
  3  1  1 24 -1  1 -1  1  1  1 27   2.6561      33
  3  1  1 27 -1  1 -1  1  1  1 24   2.6561      33
  1  1  1 27  1 -1  1  3  2  1 24   2.6561      34
  3  1  1 27 -1  1 -1  1  2  1 24   2.6561      34
  4  1  1 27  1  0  0  2  2  1 24   2.6561      34
  1  2  1 24  1 -1  1  3  1  1 27   2.6561      35
  2  2  1 24 -1  0  0  4  1  1 27   2.6561      35
  3  2  1 24 -1  1 -1  1  1  1 27   2.6561      35
  2  1  1 27 -1  0  0  4  1  1 24   2.6561      33
  4  1  1 24  1  0  0  2  1  1 27   2.6561      33
  2  1  1 27 -1  0  0  4  2  1 24   2.6561      34
  4  2  1 24  1  0  0  2  1  1 27   2.6561      35
  2  1  1 23 -1  0  0  2  1  1 28   2.6748      37
  2  1  1 28  1  0  0  2  1  1 23   2.6748      37
  3  1  1 23 -1  0  0  3  1  1 28   2.6748      37
  3  1  1 28  1  0  0  3  1  1 23   2.6748      37
  1  1  1 23  1  0  0  1  1  1 28   2.6748      37
  1  1  1 28 -1  0  0  1  1  1 23   2.6748      37
  1  1  1 28 -1  0  0  1  2  1 23   2.6748      38
  2  1  1 28  1  0  0  2  2  1 23   2.6748      38
  1  2  1 23  1  0  0  1  1  1 28   2.6748      39
  2  2  1 23 -1  0  0  2  1  1 28   2.6748      39
  3  1  1 28  1  0  0  3  2  1 23   2.6748      38
  3  2  1 23 -1  0  0  3  1  1 28   2.6748      39
  4  1  1 23  1  0  0  4  1  1 28   2.6749      37
  4  1  1 28 -1  0  0  4  1  1 23   2.6749      37
  4  1  1 28 -1  0  0  4  2  1 23   2.6749      38
  4  2  1 23  1  0  0  4  1  1 28   2.6749      39
  1  1  1 23  1  0  1  4  1  1 17   2.6772      37
  2  1  1 23 -1  0  0  3  1  1 17   2.6772      37
  3  1  1 17  1  0  0  2  1  1 23   2.6772      37
  4  1  1 17 -1  0 -1  1  1  1 23   2.6772      37
  2  1  1 23 -1  0  0  3  2  1 17   2.6772      38
  4  1  1 17 -1  0 -1  1  2  1 23   2.6772      38
  1  2  1 23  1  0  1  4  1  1 17   2.6772      39
  3  2  1 17  1  0  0  2  1  1 23   2.6772      39
  1  1  1 17 -1  0  0  4  2  1 23   2.6773      38
  3  1  1 17  1  0  0  2  2  1 23   2.6773      38
  3  1  1 23 -1  0 -1  2  2  1 17   2.6773      38
  2  2  1 17  1  0  1  3  1  1 23   2.6773      39
  2  2  1 23 -1  0  0  3  1  1 17   2.6773      39
  4  2  1 23  1  0  0  1  1  1 17   2.6773      39
  1  2  1 17 -1  0  0  4  2  1 23   2.6773      40
  2  2  1 17  1  0  1  3  2  1 23   2.6773      40
  2  2  1 23 -1  0  0  3  2  1 17   2.6773      40
  3  2  1 17  1  0  0  2  2  1 23   2.6773      40
  3  2  1 23 -1  0 -1  2  2  1 17   2.6773      40
  4  2  1 23  1  0  0  1  2  1 17   2.6773      40
  1  1  1 17 -1  0  0  4  1  1 23   2.6773      37
  2  1  1 17  1  0  1  3  1  1 23   2.6773      37
  3  1  1 23 -1  0 -1  2  1  1 17   2.6773      37
  4  1  1 23  1  0  0  1  1  1 17   2.6773      37
  1  1  1 23  1  0  1  4  2  1 17   2.6773      38
  2  1  1 17  1  0  1  3  2  1 23   2.6773      38
  4  1  1 23  1  0  0  1  2  1 17   2.6773      38
  1  2  1 17 -1  0  0  4  1  1 23   2.6773      39
  3  2  1 23 -1  0 -1  2  1  1 17   2.6773      39
  4  2  1 17 -1  0 -1  1  1  1 23   2.6773      39
  1  2  1 23  1  0  1  4  2  1 17   2.6773      40
  4  2  1 17 -1  0 -1  1  2  1 23   2.6773      40
  1  1  1 28  1  0  1  3  2  1 28   2.6877      42
  2  1  1 28 -1  1  0  4  2  1 28   2.6877      42
  3  2  1 28 -1  0 -1  1  1  1 28   2.6877      43
  4  2  1 28  1 -1  0  2  1  1 28   2.6877      43
  3  1  1 28 -1  0 -1  1  2  1 28   2.6877      42
  1  2  1 28  1  0  1  3  1  1 28   2.6877      43
  4  1  1 28  1 -1  0  2  2  1 28   2.6877      42
  2  2  1 28 -1  1  0  4  1  1 28   2.6877      43
  1  1  1  9  1 -1  0  2  1  1 19   2.7816      45
  2  1  1 19 -1  1  0  1  1  1  9   2.7816      45
  3  1  1  9 -1  1  0  4  1  1 19   2.7816      45
  3  1  1 19 -1  0  0  4  1  1  9   2.7816      45
  4  1  1  9  1  0  0  3  1  1 19   2.7816      45
  4  1  1 19  1 -1  0  3  1  1  9   2.7816      45
  2  1  1 19 -1  1  0  1  2  1  9   2.7816      46
  3  1  1  9 -1  1  0  4  2  1 19   2.7816      46
  4  1  1  9  1  0  0  3  2  1 19   2.7816      46
  4  1  1 19  1 -1  0  3  2  1  9   2.7816      46
  1  2  1  9  1 -1  0  2  1  1 19   2.7816      47
  3  2  1  9 -1  1  0  4  1  1 19   2.7816      47
  3  2  1 19 -1  0  0  4  1  1  9   2.7816      47
  4  2  1 19  1 -1  0  3  1  1  9   2.7816      47
  3  2  1  9 -1  1  0  4  2  1 19   2.7816      48
  4  2  1 19  1 -1  0  3  2  1  9   2.7816      48
  1  1  1 19  1  0  0  2  1  1  9   2.7816      45
  2  1  1  9 -1  0  0  1  1  1 19   2.7816      45
  1  1  1  9  1 -1  0  2  2  1 19   2.7816      46
  1  1  1 19  1  0  0  2  2  1  9   2.7816      46
  2  1  1  9 -1  0  0  1  2  1 19   2.7816      46
  3  1  1 19 -1  0  0  4  2  1  9   2.7816      46
  1  2  1 19  1  0  0  2  1  1  9   2.7816      47
  2  2  1  9 -1  0  0  1  1  1 19   2.7816      47
  2  2  1 19 -1  1  0  1  1  1  9   2.7816      47
  4  2  1  9  1  0  0  3  1  1 19   2.7816      47
  1  2  1  9  1 -1  0  2  2  1 19   2.7816      48
  1  2  1 19  1  0  0  2  2  1  9   2.7816      48
  2  2  1  9 -1  0  0  1  2  1 19   2.7816      48
  2  2  1 19 -1  1  0  1  2  1  9   2.7816      48
  3  2  1 19 -1  0  0  4  2  1  9   2.7816      48
  4  2  1  9  1  0  0  3  2  1 19   2.7816      48
  3  1  1 14  0  0  0  2  2  1 25   2.8326      50
  2  2  1 25  0  0  0  3  1  1 14   2.8326      51
  1  1  1 14  0  0  0  4  1  1 25   2.8326      49
  1  1  1 25  0  0  1  4  1  1 14   2.8326      49
  2  1  1 25  0  0  0  3  1  1 14   2.8326      49
  3  1  1 14  0  0  0  2  1  1 25   2.8326      49
  4  1  1 14  0  0 -1  1  1  1 25   2.8326      49
  4  1  1 25  0  0  0  1  1  1 14   2.8326      49
  1  1  1 14  0  0  0  4  2  1 25   2.8326      50
  2  1  1 14  0  0  1  3  2  1 25   2.8326      50
  4  1  1 14  0  0 -1  1  2  1 25   2.8326      50
  4  1  1 25  0  0  0  1  2  1 14   2.8326      50
  1  2  1 14  0  0  0  4  1  1 25   2.8326      51
  1  2  1 25  0  0  1  4  1  1 14   2.8326      51
  3  2  1 25  0  0 -1  2  1  1 14   2.8326      51
  4  2  1 25  0  0  0  1  1  1 14   2.8326      51
  1  2  1 14  0  0  0  4  2  1 25   2.8326      52
  2  2  1 14  0  0  1  3  2  1 25   2.8326      52
  2  2  1 25  0  0  0  3  2  1 14   2.8326      52
  3  2  1 14  0  0  0  2  2  1 25   2.8326      52
  3  2  1 25  0  0 -1  2  2  1 14   2.8326      52
  4  2  1 25  0  0  0  1  2  1 14   2.8326      52
  2  1  1 14  0  0  1  3  1  1 25   2.8326      49
  3  1  1 25  0  0 -1  2  1  1 14   2.8326      49
  1  1  1 25  0  0  1  4  2  1 14   2.8326      50
  2  1  1 25  0  0  0  3  2  1 14   2.8326      50
  3  1  1 25  0  0 -1  2  2  1 14   2.8326      50
  2  2  1 14  0  0  1  3  1  1 25   2.8326      51
  3  2  1 14  0  0  0  2  1  1 25   2.8326      51
  4  2  1 14  0  0 -1  1  1  1 25   2.8326      51
  1  2  1 25  0  0  1  4  2  1 14   2.8326      52
  4  2  1 14  0  0 -1  1  2  1 25   2.8326      52
  1  1  1 16 -1  0  0  4  1  1 23   2.8424      53
  1  1  1 23  1  0  1  4  1  1 16   2.8424      53
  4  1  1 16 -1  0 -1  1  1  1 23   2.8424      53
  4  1  1 23  1  0  0  1  1  1 16   2.8424      53
  1  1  1 16 -1  0  0  4  2  1 23   2.8424      54
  2  1  1 23 -1  0  0  3  2  1 16   2.8424      54
  3  1  1 16  1  0  0  2  2  1 23   2.8424      54
  4  1  1 16 -1  0 -1  1  2  1 23   2.8424      54
  4  1  1 23  1  0  0  1  2  1 16   2.8424      54
  1  2  1 16 -1  0  0  4  1  1 23   2.8424      55
  1  2  1 23  1  0  1  4  1  1 16   2.8424      55
  2  2  1 23 -1  0  0  3  1  1 16   2.8424      55
  3  2  1 16  1  0  0  2  1  1 23   2.8424      55
  4  2  1 23  1  0  0  1  1  1 16   2.8424      55
  1  2  1 16 -1  0  0  4  2  1 23   2.8424      56
  2  2  1 23 -1  0  0  3  2  1 16   2.8424      56
  3  2  1 16  1  0  0  2  2  1 23   2.8424      56
  4  2  1 23  1  0  0  1  2  1 16   2.8424      56
  2  1  1 23 -1  0  0  3  1  1 16   2.8424      53
  3  1  1 16  1  0  0  2  1  1 23   2.8424      53
  1  1  1 23  1  0  1  4  2  1 16   2.8424      54
  2  1  1 16  1  0  1  3  2  1 23   2.8424      54
  3  2  1 23 -1  0 -1  2  1  1 16   2.8424      55
  4  2  1 16 -1  0 -1  1  1  1 23   2.8424      55
  1  2  1 23  1  0  1  4  2  1 16   2.8424      56
  2  2  1 16  1  0  1  3  2  1 23   2.8424      56
  3  2  1 23 -1  0 -1  2  2  1 16   2.8424      56
  4  2  1 16 -1  0 -1  1  2  1 23   2.8424      56
  2  1  1 16  1  0  1  3  1  1 23   2.8424      53
  3  1  1 23 -1  0 -1  2  1  1 16   2.8424      53
  3  1  1 23 -1  0 -1  2  2  1 16   2.8424      54
  2  2  1 16  1  0  1  3  1  1 23   2.8424      55
  1  1  1  8  1 -1  0  2  1  1 19   2.8689      57
  1  1  1 19  1  0  0  2  1  1  8   2.8689      57
  2  1  1  8 -1  0  0  1  1  1 19   2.8689      57
  2  1  1 19 -1  1  0  1  1  1  8   2.8689      57
  3  1  1  8 -1  1  0  4  1  1 19   2.8689      57
  3  1  1 19 -1  0  0  4  1  1  8   2.8689      57
  4  1  1  8  1  0  0  3  1  1 19   2.8689      57
  4  1  1 19  1 -1  0  3  1  1  8   2.8689      57
  2  1  1  8 -1  0  0  1  2  1 19   2.8689      58
  2  1  1 19 -1  1  0  1  2  1  8   2.8689      58
  3  1  1  8 -1  1  0  4  2  1 19   2.8689      58
  1  2  1  8  1 -1  0  2  1  1 19   2.8689      59
  1  2  1 19  1  0  0  2  1  1  8   2.8689      59
  4  2  1 19  1 -1  0  3  1  1  8   2.8689      59
  1  1  1  8  1 -1  0  2  2  1 19   2.8689      58
  1  1  1 19  1  0  0  2  2  1  8   2.8689      58
  3  1  1 19 -1  0  0  4  2  1  8   2.8689      58
  4  1  1  8  1  0  0  3  2  1 19   2.8689      58
  4  1  1 19  1 -1  0  3  2  1  8   2.8689      58
  2  2  1  8 -1  0  0  1  1  1 19   2.8689      59
  2  2  1 19 -1  1  0  1  1  1  8   2.8689      59
  3  2  1  8 -1  1  0  4  1  1 19   2.8689      59
  3  2  1 19 -1  0  0  4  1  1  8   2.8689      59
  4  2  1  8  1  0  0  3  1  1 19   2.8689      59
  1  2  1  8  1 -1  0  2  2  1 19   2.8689      60
  1  2  1 19  1  0  0  2  2  1  8   2.8689      60
  2  2  1  8 -1  0  0  1  2  1 19   2.8689      60
  2  2  1 19 -1  1  0  1  2  1  8   2.8689      60
  3  2  1  8 -1  1  0  4  2  1 19   2.8689      60
  4  2  1 19  1 -1  0  3  2  1  8   2.8689      60
  3  2  1 19 -1  0  0  4  2  1  8   2.8689      60
  4  2  1  8  1  0  0  3  2  1 19   2.8689      60
  1  1  1 25  1  0  1  3  2  1 28   2.8808      62
  3  2  1 28 -1  0 -1  1  1  1 25   2.8808      63
  1  2  1 25  1  0  1  3  2  1 28   2.8808      64
  2  2  1 25 -1  1  0  4  2  1 28   2.8808      64
  2  2  1 28 -1  1  0  4  2  1 25   2.8808      64
  3  2  1 28 -1  0 -1  1  2  1 25   2.8808      64
  4  2  1 25  1 -1  0  2  2  1 28   2.8808      64
  4  2  1 28  1 -1  0  2  2  1 25   2.8808      64
  2  1  1 25 -1  1  0  4  2  1 28   2.8808      62
  3  1  1 25 -1  0 -1  1  2  1 28   2.8808      62
  4  1  1 25  1 -1  0  2  2  1 28   2.8808      62
  1  2  1 28  1  0  1  3  1  1 25   2.8808      63
  2  2  1 28 -1  1  0  4  1  1 25   2.8808      63
  4  2  1 28  1 -1  0  2  1  1 25   2.8808      63
  1  2  1 28  1  0  1  3  2  1 25   2.8808      64
  3  2  1 25 -1  0 -1  1  2  1 28   2.8808      64
  1  1  1 18  1  0  0  2  1  1  4   2.8975      65
  2  1  1  4 -1  0  0  1  1  1 18   2.8975      65
  3  1  1  4 -1  1  0  4  1  1 18   2.8975      65
  4  1  1 18  1 -1  0  3  1  1  4   2.8975      65
  2  1  1  4 -1  0  0  1  2  1 18   2.8975      66
  3  1  1  4 -1  1  0  4  2  1 18   2.8975      66
  1  2  1 18  1  0  0  2  1  1  4   2.8975      67
  4  2  1 18  1 -1  0  3  1  1  4   2.8975      67
  1  1  1  4  1 -1  0  2  1  1 18   2.8975      65
  2  1  1 18 -1  1  0  1  1  1  4   2.8975      65
  1  1  1  4  1 -1  0  2  2  1 18   2.8975      66
  1  1  1 18  1  0  0  2  2  1  4   2.8975      66
  2  1  1 18 -1  1  0  1  2  1  4   2.8975      66
  3  1  1 18 -1  0  0  4  2  1  4   2.8975      66
  1  2  1  4  1 -1  0  2  1  1 18   2.8975      67
  2  2  1  4 -1  0  0  1  1  1 18   2.8975      67
  2  2  1 18 -1  1  0  1  1  1  4   2.8975      67
  4  2  1  4  1  0  0  3  1  1 18   2.8975      67
  1  2  1  4  1 -1  0  2  2  1 18   2.8975      68
  1  2  1 18  1  0  0  2  2  1  4   2.8975      68
  2  2  1  4 -1  0  0  1  2  1 18   2.8975      68
  2  2  1 18 -1  1  0  1  2  1  4   2.8975      68
  3  2  1  4 -1  1  0  4  2  1 18   2.8975      68
  3  2  1 18 -1  0  0  4  2  1  4   2.8975      68
  4  2  1  4  1  0  0  3  2  1 18   2.8975      68
  4  2  1 18  1 -1  0  3  2  1  4   2.8975      68
  3  1  1 18 -1  0  0  4  1  1  4   2.8975      65
  4  1  1  4  1  0  0  3  1  1 18   2.8975      65
  4  1  1  4  1  0  0  3  2  1 18   2.8975      66
  4  1  1 18  1 -1  0  3  2  1  4   2.8975      66
  3  2  1  4 -1  1  0  4  1  1 18   2.8975      67
  3  2  1 18 -1  0  0  4  1  1  4   2.8975      67
  4  1  1 11  1  0  0  3  2  1 28   2.9460      70
  3  2  1 28 -1  0  0  4  1  1 11   2.9460      71
  1  1  1 11  1 -1  0  2  2  1 28   2.9460      70
  2  2  1 28 -1  1  0  1  1  1 11   2.9460      71
  1  2  1 11  1 -1  0  2  2  1 28   2.9460      72
  2  2  1 28 -1  1  0  1  2  1 11   2.9460      72
  3  2  1 11 -1  1  0  4  2  1 28   2.9460      72
  4  2  1 28  1 -1  0  3  2  1 11   2.9460      72
  2  1  1 11 -1  0  0  1  2  1 28   2.9460      70
  3  1  1 11 -1  1  0  4  2  1 28   2.9460      70
  1  2  1 28  1  0  0  2  1  1 11   2.9460      71
  4  2  1 28  1 -1  0  3  1  1 11   2.9460      71
  1  2  1 28  1  0  0  2  2  1 11   2.9460      72
  2  2  1 11 -1  0  0  1  2  1 28   2.9460      72
  3  2  1 28 -1  0  0  4  2  1 11   2.9460      72
  4  2  1 11  1  0  0  3  2  1 28   2.9460      72
  4  1  1 13  0  0 -1  1  1  1 25   2.9472      69
  1  1  1 13  0  0  0  4  2  1 25   2.9472      70
  4  1  1 13  0  0 -1  1  2  1 25   2.9472      70
  1  2  1 25  0  0  1  4  1  1 13   2.9472      71
  4  2  1 25  0  0  0  1  1  1 13   2.9472      71
  1  2  1 13  0  0  0  4  2  1 25   2.9472      72
  4  2  1 25  0  0  0  1  2  1 13   2.9472      72
  1  1  1 13  0  0  0  4  1  1 25   2.9472      69
  1  1  1 25  0  0  1  4  1  1 13   2.9472      69
  2  1  1 25  0  0  0  3  1  1 13   2.9472      69
  3  1  1 13  0  0  0  2  1  1 25   2.9472      69
  4  1  1 25  0  0  0  1  1  1 13   2.9472      69
  2  1  1 13  0  0  1  3  2  1 25   2.9472      70
  3  1  1 13  0  0  0  2  2  1 25   2.9472      70
  4  1  1 25  0  0  0  1  2  1 13   2.9472      70
  1  2  1 13  0  0  0  4  1  1 25   2.9472      71
  2  2  1 25  0  0  0  3  1  1 13   2.9472      71
  3  2  1 25  0  0 -1  2  1  1 13   2.9472      71
  2  2  1 25  0  0  0  3  2  1 13   2.9472      72
  3  2  1 13  0  0  0  2  2  1 25   2.9472      72
  2  1  1 13  0  0  1  3  1  1 25   2.9472      69
  3  1  1 25  0  0 -1  2  1  1 13   2.9472      69
  1  1  1 25  0  0  1  4  2  1 13   2.9472      70
  2  1  1 25  0  0  0  3  2  1 13   2.9472      70
  3  1  1 25  0  0 -1  2  2  1 13   2.9472      70
  2  2  1 13  0  0  1  3  1  1 25   2.9472      71
  3  2  1 13  0  0  0  2  1  1 25   2.9472      71
  4  2  1 13  0  0 -1  1  1  1 25   2.9472      71
  1  2  1 25  0  0  1  4  2  1 13   2.9472      72
  2  2  1 13  0  0  1  3  2  1 25   2.9472      72
  3  2  1 25  0  0 -1  2  2  1 13   2.9472      72
  4  2  1 13  0  0 -1  1  2  1 25   2.9472      72
  2  1  1  6 -1  0  0  4  1  1 27   2.9540      73
  4  1  1 27  1  0  0  2  1  1  6   2.9540      73
  1  1  1  6  1 -1  1  3  1  1 27   2.9540      73
  1  1  1 27  1 -1  1  3  1  1  6   2.9540      73
  3  1  1  6 -1  1 -1  1  1  1 27   2.9540      73
  3  1  1 27 -1  1 -1  1  1  1  6   2.9540      73
  1  1  1 27  1 -1  1  3  2  1  6   2.9540      74
  3  1  1 27 -1  1 -1  1  2  1  6   2.9540      74
  4  1  1 27  1  0  0  2  2  1  6   2.9540      74
  1  2  1  6  1 -1  1  3  1  1 27   2.9540      75
  2  2  1  6 -1  0  0  4  1  1 27   2.9540      75
  3  2  1  6 -1  1 -1  1  1  1 27   2.9540      75
  2  1  1 27 -1  0  0  4  1  1  6   2.9540      73
  4  1  1  6  1  0  0  2  1  1 27   2.9540      73
  2  1  1 27 -1  0  0  4  2  1  6   2.9540      74
  4  2  1  6  1  0  0  2  1  1 27   2.9540      75
  1  1  1 18  1  0  0  2  1  1  3   2.9612      77
  2  1  1  3 -1  0  0  1  1  1 18   2.9612      77
  3  1  1  3 -1  1  0  4  1  1 18   2.9612      77
  4  1  1 18  1 -1  0  3  1  1  3   2.9612      77
  2  1  1  3 -1  0  0  1  2  1 18   2.9612      78
  3  1  1  3 -1  1  0  4  2  1 18   2.9612      78
  1  2  1 18  1  0  0  2  1  1  3   2.9612      79
  4  2  1 18  1 -1  0  3  1  1  3   2.9612      79
  1  1  1  3  1 -1  0  2  1  1 18   2.9613      77
  2  1  1 18 -1  1  0  1  1  1  3   2.9613      77
  3  1  1 18 -1  0  0  4  1  1  3   2.9613      77
  4  1  1  3  1  0  0  3  1  1 18   2.9613      77
  1  1  1  3  1 -1  0  2  2  1 18   2.9613      78
  1  1  1 18  1  0  0  2  2  1  3   2.9613      78
  2  1  1 18 -1  1  0  1  2  1  3   2.9613      78
  3  1  1 18 -1  0  0  4  2  1  3   2.9613      78
  4  1  1  3  1  0  0  3  2  1 18   2.9613      78
  4  1  1 18  1 -1  0  3  2  1  3   2.9613      78
  1  2  1  3  1 -1  0  2  1  1 18   2.9613      79
  2  2  1  3 -1  0  0  1  1  1 18   2.9613      79
  2  2  1 18 -1  1  0  1  1  1  3   2.9613      79
  3  2  1  3 -1  1  0  4  1  1 18   2.9613      79
  3  2  1 18 -1  0  0  4  1  1  3   2.9613      79
  4  2  1  3  1  0  0  3  1  1 18   2.9613      79
  1  2  1  3  1 -1  0  2  2  1 18   2.9613      80
  1  2  1 18  1  0  0  2  2  1  3   2.9613      80
  2  2  1  3 -1  0  0  1  2  1 18   2.9613      80
  2  2  1 18 -1  1  0  1  2  1  3   2.9613      80
  3  2  1  3 -1  1  0  4  2  1 18   2.9613      80
  3  2  1 18 -1  0  0  4  2  1  3   2.9613      80
  4  2  1  3  1  0  0  3  2  1 18   2.9613      80
  4  2  1 18  1 -1  0  3  2  1  3   2.9613      80
  1  1  1 21  0  0  0  4  1  1 24   2.9715      81
  2  1  1 24  0  0  0  3  1  1 21   2.9715      81
  3  1  1 21  0  0  0  2  1  1 24   2.9715      81
  4  1  1 24  0  0  0  1  1  1 21   2.9715      81
  1  1  1 21  0  0  0  4  2  1 24   2.9715      82
  2  1  1 21  0  0  1  3  2  1 24   2.9715      82
  3  1  1 21  0  0  0  2  2  1 24   2.9715      82
  2  2  1 24  0  0  0  3  1  1 21   2.9715      83
  3  2  1 24  0  0 -1  2  1  1 21   2.9715      83
  4  2  1 24  0  0  0  1  1  1 21   2.9715      83
  2  1  1 21  0  0  1  3  1  1 24   2.9715      81
  3  1  1 24  0  0 -1  2  1  1 21   2.9715      81
  1  1  1 24  0  0  1  4  1  1 21   2.9715      81
  4  1  1 21  0  0 -1  1  1  1 24   2.9715      81
  4  1  1 21  0  0 -1  1  2  1 24   2.9715      82
  1  2  1 24  0  0  1  4  1  1 21   2.9715      83
  4  1  1 24  0  0  0  1  2  1 21   2.9869      86
  1  2  1 21  0  0  0  4  1  1 24   2.9869      87
  1  2  1 21  0  0  0  4  2  1 24   2.9869      88
  4  2  1 24  0  0  0  1  2  1 21   2.9869      88
  2  2  1 21  0  0  1  3  2  1 24   2.9869      88
  3  2  1 24  0  0 -1  2  2  1 21   2.9869      88
  1  1  1 24  0  0  1  4  2  1 21   2.9869      86
  2  1  1 24  0  0  0  3  2  1 21   2.9869      86
  3  1  1 24  0  0 -1  2  2  1 21   2.9869      86
  2  2  1 21  0  0  1  3  1  1 24   2.9869      87
  3  2  1 21  0  0  0  2  1  1 24   2.9869      87
  4  2  1 21  0  0 -1  1  1  1 24   2.9869      87
  1  2  1 24  0  0  1  4  2  1 21   2.9869      88
  2  2  1 24  0  0  0  3  2  1 21   2.9869      88
  3  2  1 21  0  0  0  2  2  1 24   2.9869      88
  4  2  1 21  0  0 -1  1  2  1 24   2.9869      88
  1  1  1 10  1 -1  0  2  2  1 28   3.0044      90
  4  1  1 10  1  0  0  3  2  1 28   3.0044      90
  1  2  1 28  1  0  0  2  1  1 10   3.0044      91
  2  2  1 28 -1  1  0  1  1  1 10   3.0044      91
  3  2  1 28 -1  0  0  4  1  1 10   3.0044      91
  1  2  1 10  1 -1  0  2  2  1 28   3.0044      92
  2  2  1 28 -1  1  0  1  2  1 10   3.0044      92
  2  1  1 10 -1  0  0  1  2  1 28   3.0044      90
  3  1  1 10 -1  1  0  4  2  1 28   3.0044      90
  4  2  1 28  1 -1  0  3  1  1 10   3.0044      91
  1  2  1 28  1  0  0  2  2  1 10   3.0044      92
  2  2  1 10 -1  0  0  1  2  1 28   3.0044      92
  3  2  1 10 -1  1  0  4  2  1 28   3.0044      92
  3  2  1 28 -1  0  0  4  2  1 10   3.0044      92
  4  2  1 10  1  0  0  3  2  1 28   3.0044      92
  4  2  1 28  1 -1  0  3  2  1 10   3.0044      92
  3  2  1 20  0  1  0  4  2  1 17   3.0121      96
  4  2  1 17  0 -1  0  3  2  1 20   3.0121      96
  2  1  1 17  0  1  0  1  2  1 20   3.0121      94
  3  1  1 17  0  0  0  4  2  1 20   3.0121      94
  4  1  1 17  0 -1  0  3  2  1 20   3.0121      94
  1  2  1 20  0 -1  0  2  1  1 17   3.0121      95
  3  2  1 20  0  1  0  4  1  1 17   3.0121      95
  4  2  1 20  0  0  0  3  1  1 17   3.0121      95
  1  2  1 20  0 -1  0  2  2  1 17   3.0121      96
  2  2  1 17  0  1  0  1  2  1 20   3.0121      96
  3  2  1 17  0  0  0  4  2  1 20   3.0121      96
  4  2  1 20  0  0  0  3  2  1 17   3.0121      96
  1  1  1 17  0  0  0  2  2  1 20   3.0121      94
  2  2  1 20  0  0  0  1  1  1 17   3.0121      95
  1  2  1 17  0  0  0  2  2  1 20   3.0121      96
  2  2  1 20  0  0  0  1  2  1 17   3.0121      96
  2  1  1 17  0  1  0  1  1  1 20   3.0397      97
  3  1  1 17  0  0  0  4  1  1 20   3.0397      97
  4  1  1 20  0  0  0  3  1  1 17   3.0397      97
  3  1  1 20  0  1  0  4  2  1 17   3.0397      98
  4  1  1 20  0  0  0  3  2  1 17   3.0397      98
  3  2  1 17  0  0  0  4  1  1 20   3.0397      99
  4  2  1 17  0 -1  0  3  1  1 20   3.0397      99
  1  1  1 17  0  0  0  2  1  1 20   3.0397      97
  1  1  1 20  0 -1  0  2  1  1 17   3.0397      97
  2  1  1 20  0  0  0  1  1  1 17   3.0397      97
  3  1  1 20  0  1  0  4  1  1 17   3.0397      97
  4  1  1 17  0 -1  0  3  1  1 20   3.0397      97
  1  1  1 20  0 -1  0  2  2  1 17   3.0397      98
  2  1  1 20  0  0  0  1  2  1 17   3.0397      98
  1  2  1 17  0  0  0  2  1  1 20   3.0397      99
  2  2  1 17  0  1  0  1  1  1 20   3.0397      99
  1  1  1 18  1  0  0  2  1  1  5   3.0406      97
  2  1  1  5 -1  0  0  1  1  1 18   3.0406      97
  3  1  1  5 -1  1  0  4  1  1 18   3.0406      97
  4  1  1 18  1 -1  0  3  1  1  5   3.0406      97
  2  1  1  5 -1  0  0  1  2  1 18   3.0406      98
  3  1  1  5 -1  1  0  4  2  1 18   3.0406      98
  1  2  1 18  1  0  0  2  1  1  5   3.0406      99
  4  2  1 18  1 -1  0  3  1  1  5   3.0406      99
  1  1  1  5  1 -1  0  2  1  1 18   3.0406      97
  2  1  1 18 -1  1  0  1  1  1  5   3.0406      97
  1  1  1  5  1 -1  0  2  2  1 18   3.0406      98
  1  1  1 18  1  0  0  2  2  1  5   3.0406      98
  2  1  1 18 -1  1  0  1  2  1  5   3.0406      98
  3  1  1 18 -1  0  0  4  2  1  5   3.0406      98
  4  1  1 18  1 -1  0  3  2  1  5   3.0406      98
  1  2  1  5  1 -1  0  2  1  1 18   3.0406      99
  2  2  1  5 -1  0  0  1  1  1 18   3.0406      99
  2  2  1 18 -1  1  0  1  1  1  5   3.0406      99
  3  2  1  5 -1  1  0  4  1  1 18   3.0406      99
  4  2  1  5  1  0  0  3  1  1 18   3.0406      99
  1  2  1  5  1 -1  0  2  2  1 18   3.0406     100
  1  2  1 18  1  0  0  2  2  1  5   3.0406     100
  2  2  1  5 -1  0  0  1  2  1 18   3.0406     100
  2  2  1 18 -1  1  0  1  2  1  5   3.0406     100
  3  2  1  5 -1  1  0  4  2  1 18   3.0406     100
  4  2  1 18  1 -1  0  3  2  1  5   3.0406     100
  3  1  1 18 -1  0  0  4  1  1  5   3.0407      97
  4  1  1  5  1  0  0  3  1  1 18   3.0407      97
  3  2  1 18 -1  0  0  4  2  1  5   3.0407     100
  4  2  1  5  1  0  0  3  2  1 18   3.0407     100
  4  1  1  5  1  0  0  3  2  1 18   3.0407      98
  3  2  1 18 -1  0  0  4  1  1  5   3.0407      99
  2  1  1 28 -1  1  0  4  1  1 21   3.0560     101
  4  1  1 21  1 -1  0  2  1  1 28   3.0560     101
  1  1  1 21  1  0  1  3  1  1 28   3.0560     101
  3  1  1 28 -1  0 -1  1  1  1 21   3.0560     101
  1  1  1 28  1  0  1  3  1  1 21   3.0560     101
  3  1  1 21 -1  0 -1  1  1  1 28   3.0560     101
  2  1  1 21 -1  1  0  4  1  1 28   3.0560     101
  4  1  1 28  1 -1  0  2  1  1 21   3.0560     101
  1  1  1 28  1  0  1  3  2  1 21   3.0573     102
  2  1  1 28 -1  1  0  4  2  1 21   3.0573     102
  3  2  1 21 -1  0 -1  1  1  1 28   3.0573     103
  4  2  1 21  1 -1  0  2  1  1 28   3.0573     103
  3  1  1 28 -1  0 -1  1  2  1 21   3.0573     102
  1  2  1 21  1  0  1  3  1  1 28   3.0573     103
  4  1  1 28  1 -1  0  2  2  1 21   3.0573     102
  2  2  1 21 -1  1  0  4  1  1 28   3.0573     103
  1  2  1 20  1  0  1  3  2  1 26   3.0573     104
  2  2  1 20 -1  1  0  4  2  1 26   3.0573     104
  3  2  1 26 -1  0 -1  1  2  1 20   3.0573     104
  4  2  1 26  1 -1  0  2  2  1 20   3.0573     104
  2  2  1 26 -1  1  0  4  2  1 20   3.0573     104
  4  2  1 20  1 -1  0  2  2  1 26   3.0573     104
  1  2  1 26  1  0  1  3  2  1 20   3.0573     104
  3  2  1 20 -1  0 -1  1  2  1 26   3.0573     104
  1  1  1 27  1 -1  0  2  2  1 27   3.0584     102
  2  2  1 27 -1  1  0  1  1  1 27   3.0584     103
  2  1  1 27 -1  0  0  1  2  1 27   3.0584     102
  3  1  1 27 -1  1  0  4  2  1 27   3.0584     102
  4  1  1 27  1  0  0  3  2  1 27   3.0584     102
  1  2  1 27  1  0  0  2  1  1 27   3.0584     103
  3  2  1 27 -1  0  0  4  1  1 27   3.0584     103
  4  2  1 27  1 -1  0  3  1  1 27   3.0584     103
  2  1  1 25  0  0  0  3  1  1 19   3.0632     105
  3  1  1 19  0  0  0  2  1  1 25   3.0632     105
  2  1  1 19  0  0  1  3  2  1 25   3.0632     106
  3  1  1 19  0  0  0  2  2  1 25   3.0632     106
  2  2  1 25  0  0  0  3  1  1 19   3.0632     107
  3  2  1 25  0  0 -1  2  1  1 19   3.0632     107
  2  2  1 19  0  0  1  3  2  1 25   3.0632     108
  3  2  1 25  0  0 -1  2  2  1 19   3.0632     108
  1  1  1 19  0  0  0  4  1  1 25   3.0632     105
  1  1  1 25  0  0  1  4  1  1 19   3.0632     105
  2  1  1 19  0  0  1  3  1  1 25   3.0632     105
  3  1  1 25  0  0 -1  2  1  1 19   3.0632     105
  4  1  1 19  0  0 -1  1  1  1 25   3.0632     105
  4  1  1 25  0  0  0  1  1  1 19   3.0632     105
  1  1  1 19  0  0  0  4  2  1 25   3.0632     106
  1  1  1 25  0  0  1  4  2  1 19   3.0632     106
  3  1  1 25  0  0 -1  2  2  1 19   3.0632     106
  4  1  1 19  0  0 -1  1  2  1 25   3.0632     106
  4  1  1 25  0  0  0  1  2  1 19   3.0632     106
  1  2  1 19  0  0  0  4  1  1 25   3.0632     107
  1  2  1 25  0  0  1  4  1  1 19   3.0632     107
  2  2  1 19  0  0  1  3  1  1 25   3.0632     107
  4  2  1 19  0  0 -1  1  1  1 25   3.0632     107
  4  2  1 25  0  0  0  1  1  1 19   3.0632     107
  1  2  1 19  0  0  0  4  2  1 25   3.0632     108
  1  2  1 25  0  0  1  4  2  1 19   3.0632     108
  4  2  1 19  0  0 -1  1  2  1 25   3.0632     108
  4  2  1 25  0  0  0  1  2  1 19   3.0632     108
  2  1  1 25  0  0  0  3  2  1 19   3.0632     106
  3  2  1 19  0  0  0  2  1  1 25   3.0632     107
  2  2  1 25  0  0  0  3  2  1 19   3.0632     108
  3  2  1 19  0  0  0  2  2  1 25   3.0632     108
  1  1  1 28  0  0  1  4  1  1 12   3.0649     105
  4  1  1 12  0  0 -1  1  1  1 28   3.0649     105
  2  1  1 28  0  0  0  3  1  1 12   3.0649     105
  3  1  1 12  0  0  0  2  1  1 28   3.0649     105
  2  1  1 28  0  0  0  3  2  1 12   3.0649     106
  3  2  1 12  0  0  0  2  1  1 28   3.0649     107
  1  1  1 12  0  0  0  4  1  1 28   3.0649     105
  4  1  1 28  0  0  0  1  1  1 12   3.0649     105
  1  1  1 28  0  0  1  4  2  1 12   3.0649     106
  4  1  1 28  0  0  0  1  2  1 12   3.0649     106
  1  2  1 12  0  0  0  4  1  1 28   3.0649     107
  4  2  1 12  0  0 -1  1  1  1 28   3.0649     107
  2  1  1 12  0  0  1  3  1  1 28   3.0649     105
  3  1  1 28  0  0 -1  2  1  1 12   3.0649     105
  3  1  1 28  0  0 -1  2  2  1 12   3.0649     106
  2  2  1 12  0  0  1  3  1  1 28   3.0649     107
  1  1  1 20  1  0  1  3  2  1 26   3.0718     110
  2  1  1 20 -1  1  0  4  2  1 26   3.0718     110
  3  2  1 26 -1  0 -1  1  1  1 20   3.0718     111
  4  2  1 26  1 -1  0  2  1  1 20   3.0718     111
  1  2  1 26  1  0  1  3  1  1 20   3.0718     111
  3  1  1 20 -1  0 -1  1  2  1 26   3.0718     110
  4  1  1 20  1 -1  0  2  2  1 26   3.0718     110
  2  2  1 26 -1  1  0  4  1  1 20   3.0718     111
  2  1  1  6 -1  0  0  3  1  1 17   3.0729     109
  3  1  1 17  1  0  0  2  1  1  6   3.0729     109
  1  1  1  6  1  0  1  4  1  1 17   3.0729     109
  4  1  1 17 -1  0 -1  1  1  1  6   3.0729     109
  1  1  1  6  1  0  1  4  2  1 17   3.0729     110
  2  1  1  6 -1  0  0  3  2  1 17   3.0729     110
  2  1  1 17  1  0  1  3  2  1  6   3.0729     110
  3  1  1  6 -1  0 -1  2  2  1 17   3.0729     110
  3  1  1 17  1  0  0  2  2  1  6   3.0729     110
  4  1  1 17 -1  0 -1  1  2  1  6   3.0729     110
  1  2  1  6  1  0  1  4  1  1 17   3.0729     111
  2  2  1  6 -1  0  0  3  1  1 17   3.0729     111
  2  2  1 17  1  0  1  3  1  1  6   3.0729     111
  3  2  1  6 -1  0 -1  2  1  1 17   3.0729     111
  3  2  1 17  1  0  0  2  1  1  6   3.0729     111
  4  2  1 17 -1  0 -1  1  1  1  6   3.0729     111
  1  2  1  6  1  0  1  4  2  1 17   3.0729     112
  2  2  1  6 -1  0  0  3  2  1 17   3.0729     112
  2  2  1 17  1  0  1  3  2  1  6   3.0729     112
  3  2  1  6 -1  0 -1  2  2  1 17   3.0729     112
  3  2  1 17  1  0  0  2  2  1  6   3.0729     112
  4  2  1 17 -1  0 -1  1  2  1  6   3.0729     112
  1  1  1 17 -1  0  0  4  1  1  6   3.0729     109
  2  1  1 17  1  0  1  3  1  1  6   3.0729     109
  3  1  1  6 -1  0 -1  2  1  1 17   3.0729     109
  4  1  1  6  1  0  0  1  1  1 17   3.0729     109
  1  1  1 17 -1  0  0  4  2  1  6   3.0729     110
  4  1  1  6  1  0  0  1  2  1 17   3.0729     110
  1  2  1 17 -1  0  0  4  1  1  6   3.0729     111
  4  2  1  6  1  0  0  1  1  1 17   3.0729     111
  1  2  1 17 -1  0  0  4  2  1  6   3.0729     112
  4  2  1  6  1  0  0  1  2  1 17   3.0729     112
  1  1  1 28  0  0  1  4  1  1 17   3.0735     109
  4  1  1 17  0  0 -1  1  1  1 28   3.0735     109
  2  1  1 28  0  0  0  3  2  1 17   3.0735     110
  3  2  1 17  0  0  0  2  1  1 28   3.0735     111
  1  1  1 17  0  0  0  4  1  1 28   3.0735     109
  2  1  1 28  0  0  0  3  1  1 17   3.0735     109
  3  1  1 17  0  0  0  2  1  1 28   3.0735     109
  4  1  1 28  0  0  0  1  1  1 17   3.0735     109
  1  1  1 28  0  0  1  4  2  1 17   3.0735     110
  4  1  1 28  0  0  0  1  2  1 17   3.0735     110
  1  2  1 17  0  0  0  4  1  1 28   3.0735     111
  4  2  1 17  0  0 -1  1  1  1 28   3.0735     111
  2  1  1 17  0  0  1  3  1  1 28   3.0735     109
  3  1  1 28  0  0 -1  2  1  1 17   3.0735     109
  3  1  1 28  0  0 -1  2  2  1 17   3.0735     110
  2  2  1 17  0  0  1  3  1  1 28   3.0735     111
  2  1  1 23 -2  1  0  4  1  1 21   3.0769     113
  4  1  1 21  2 -1  0  2  1  1 23   3.0769     113
  4  1  1 21  2 -1  0  2  2  1 23   3.0769     114
  2  2  1 23 -2  1  0  4  1  1 21   3.0769     115
  1  1  1 21  2  0  1  3  1  1 23   3.0769     113
  1  1  1 23  2  0  1  3  1  1 21   3.0769     113
  2  1  1 21 -2  1  0  4  1  1 23   3.0769     113
  3  1  1 21 -2  0 -1  1  1  1 23   3.0769     113
  3  1  1 23 -2  0 -1  1  1  1 21   3.0769     113
  4  1  1 23  2 -1  0  2  1  1 21   3.0769     113
  1  1  1 21  2  0  1  3  2  1 23   3.0769     114
  3  1  1 21 -2  0 -1  1  2  1 23   3.0769     114
  1  2  1 23  2  0  1  3  1  1 21   3.0769     115
  3  2  1 23 -2  0 -1  1  1  1 21   3.0769     115
  2  1  1 21 -2  1  0  4  2  1 23   3.0769     114
  4  2  1 23  2 -1  0  2  1  1 21   3.0769     115
  1  1  1 22  2  0  1  3  2  1 26   3.0835     118
  2  1  1 22 -2  1  0  4  2  1 26   3.0835     118
  4  1  1 22  2 -1  0  2  2  1 26   3.0835     118
  2  2  1 26 -2  1  0  4  1  1 22   3.0835     119
  3  2  1 26 -2  0 -1  1  1  1 22   3.0835     119
  4  2  1 26  2 -1  0  2  1  1 22   3.0835     119
  1  2  1 22  2  0  1  3  2  1 26   3.0835     120
  1  2  1 26  2  0  1  3  2  1 22   3.0835     120
  2  2  1 22 -2  1  0  4  2  1 26   3.0835     120
  2  2  1 26 -2  1  0  4  2  1 22   3.0835     120
  3  2  1 22 -2  0 -1  1  2  1 26   3.0835     120
  3  2  1 26 -2  0 -1  1  2  1 22   3.0835     120
  4  2  1 22  2 -1  0  2  2  1 26   3.0835     120
  4  2  1 26  2 -1  0  2  2  1 22   3.0835     120
  3  1  1 22 -2  0 -1  1  2  1 26   3.0835     118
  1  2  1 26  2  0  1  3  1  1 22   3.0835     119
  1  1  1  7  1  0  1  3  2  1 28   3.0911     122
  4  1  1  7  1 -1  0  2  2  1 28   3.0911     122
  2  2  1 28 -1  1  0  4  1  1  7   3.0911     123
  3  2  1 28 -1  0 -1  1  1  1  7   3.0911     123
  1  2  1  7  1  0  1  3  2  1 28   3.0911     124
  2  2  1  7 -1  1  0  4  2  1 28   3.0911     124
  2  2  1 28 -1  1  0  4  2  1  7   3.0911     124
  3  2  1 28 -1  0 -1  1  2  1  7   3.0911     124
  4  2  1  7  1 -1  0  2  2  1 28   3.0911     124
  4  2  1 28  1 -1  0  2  2  1  7   3.0911     124
  2  1  1  7 -1  1  0  4  2  1 28   3.0911     122
  3  1  1  7 -1  0 -1  1  2  1 28   3.0911     122
  1  2  1 28  1  0  1  3  1  1  7   3.0911     123
  4  2  1 28  1 -1  0  2  1  1  7   3.0911     123
  1  2  1 28  1  0  1  3  2  1  7   3.0911     124
  3  2  1  7 -1  0 -1  1  2  1 28   3.0911     124
  3  1  1 10 -1  1  0  4  1  1 19   3.0946     121
  3  1  1 19 -1  0  0  4  1  1 10   3.0946     121
  4  1  1 10  1  0  0  3  1  1 19   3.0946     121
  4  1  1 19  1 -1  0  3  1  1 10   3.0946     121
  4  1  1 10  1  0  0  3  2  1 19   3.0946     122
  4  1  1 19  1 -1  0  3  2  1 10   3.0946     122
  3  2  1 10 -1  1  0  4  1  1 19   3.0946     123
  3  2  1 19 -1  0  0  4  1  1 10   3.0946     123
  1  1  1 10  1 -1  0  2  1  1 19   3.0946     121
  1  1  1 19  1  0  0  2  1  1 10   3.0946     121
  2  1  1 10 -1  0  0  1  1  1 19   3.0946     121
  2  1  1 19 -1  1  0  1  1  1 10   3.0946     121
  1  1  1 10  1 -1  0  2  2  1 19   3.0946     122
  1  1  1 19  1  0  0  2  2  1 10   3.0946     122
  2  1  1 10 -1  0  0  1  2  1 19   3.0946     122
  2  1  1 19 -1  1  0  1  2  1 10   3.0946     122
  3  1  1 10 -1  1  0  4  2  1 19   3.0946     122
  1  2  1 10  1 -1  0  2  1  1 19   3.0946     123
  1  2  1 19  1  0  0  2  1  1 10   3.0946     123
  2  2  1 10 -1  0  0  1  1  1 19   3.0946     123
  2  2  1 19 -1  1  0  1  1  1 10   3.0946     123
  4  2  1 19  1 -1  0  3  1  1 10   3.0946     123
  1  2  1 10  1 -1  0  2  2  1 19   3.0946     124
  1  2  1 19  1  0  0  2  2  1 10   3.0946     124
  2  2  1 10 -1  0  0  1  2  1 19   3.0946     124
  2  2  1 19 -1  1  0  1  2  1 10   3.0946     124
  3  2  1 10 -1  1  0  4  2  1 19   3.0946     124
  3  2  1 19 -1  0  0  4  2  1 10   3.0946     124
  4  2  1 10  1  0  0  3  2  1 19   3.0946     124
  4  2  1 19  1 -1  0  3  2  1 10   3.0946     124
  3  1  1 19 -1  0  0  4  2  1 10   3.0946     122
  4  2  1 10  1  0  0  3  1  1 19   3.0946     123
  2  1  1 16  1  0  0  2  1  1 22   3.1040     125
  2  1  1 22 -1  0  0  2  1  1 16   3.1040     125
  2  1  1 22 -1  0  0  2  2  1 16   3.1040     126
  2  2  1 16  1  0  0  2  1  1 22   3.1040     127
  3  1  1 16  1  0  0  3  1  1 22   3.1040     125
  3  1  1 22 -1  0  0  3  1  1 16   3.1040     125
  2  1  1 16  1  0  0  2  2  1 22   3.1040     126
  2  2  1 22 -1  0  0  2  1  1 16   3.1040     127
  2  2  1 16  1  0  0  2  2  1 22   3.1040     128
  2  2  1 22 -1  0  0  2  2  1 16   3.1040     128
  1  1  1 16 -1  0  0  1  1  1 22   3.1040     125
  1  1  1 22  1  0  0  1  1  1 16   3.1040     125
  1  1  1 16 -1  0  0  1  2  1 22   3.1040     126
  1  1  1 22  1  0  0  1  2  1 16   3.1040     126
  3  1  1 22 -1  0  0  3  2  1 16   3.1040     126
  1  2  1 16 -1  0  0  1  1  1 22   3.1040     127
  1  2  1 22  1  0  0  1  1  1 16   3.1040     127
  3  2  1 16  1  0  0  3  1  1 22   3.1040     127
  1  2  1 16 -1  0  0  1  2  1 22   3.1040     128
  1  2  1 22  1  0  0  1  2  1 16   3.1040     128
  4  2  1 16 -1  0  0  4  2  1 22   3.1040     128
  4  2  1 22  1  0  0  4  2  1 16   3.1040     128
  3  1  1 16  1  0  0  3  2  1 22   3.1040     126
  4  1  1 22  1  0  0  4  2  1 16   3.1040     126
  3  2  1 22 -1  0  0  3  1  1 16   3.1040     127
  4  2  1 16 -1  0  0  4  1  1 22   3.1040     127
  3  2  1 16  1  0  0  3  2  1 22   3.1040     128
  3  2  1 22 -1  0  0  3  2  1 16   3.1040     128
  4  1  1 16 -1  0  0  4  2  1 22   3.1040     126
  4  2  1 22  1  0  0  4  1  1 16   3.1040     127
  4  1  1 16 -1  0  0  4  1  1 22   3.1040     125
  4  1  1 22  1  0  0  4  1  1 16   3.1040     125
  1  1  1 27  0  0  1  4  1  1 18   3.1148     129
  2  1  1 27  0  0  0  3  1  1 18   3.1148     129
  3  1  1 18  0  0  0  2  1  1 27   3.1148     129
  4  1  1 18  0  0 -1  1  1  1 27   3.1148     129
  1  1  1 18  0  0  0  4  1  1 27   3.1149     129
  2  1  1 18  0  0  1  3  1  1 27   3.1149     129
  3  1  1 27  0  0 -1  2  1  1 18   3.1149     129
  4  1  1 27  0  0  0  1  1  1 18   3.1149     129
  1  1  1 27  0  0  1  4  2  1 18   3.1149     130
  2  1  1 27  0  0  0  3  2  1 18   3.1149     130
  3  1  1 27  0  0 -1  2  2  1 18   3.1149     130
  4  1  1 27  0  0  0  1  2  1 18   3.1149     130
  1  2  1 18  0  0  0  4  1  1 27   3.1149     131
  2  2  1 18  0  0  1  3  1  1 27   3.1149     131
  3  2  1 18  0  0  0  2  1  1 27   3.1149     131
  4  2  1 18  0  0 -1  1  1  1 27   3.1149     131
  1  1  1  2  0  0  0  4  1  1 24   3.1254     133
  4  1  1 24  0  0  0  1  1  1  2   3.1254     133
  1  1  1  2  0  0  0  4  2  1 24   3.1254     134
  4  1  1 24  0  0  0  1  2  1  2   3.1254     134
  1  2  1  2  0  0  0  4  1  1 24   3.1254     135
  4  2  1 24  0  0  0  1  1  1  2   3.1254     135
  1  2  1  2  0  0  0  4  2  1 24   3.1254     136
  4  2  1 24  0  0  0  1  2  1  2   3.1254     136
  2  1  1  2  0  0  1  3  2  1 24   3.1254     134
  3  1  1  2  0  0  0  2  2  1 24   3.1254     134
  2  2  1 24  0  0  0  3  1  1  2   3.1254     135
  3  2  1 24  0  0 -1  2  1  1  2   3.1254     135
  2  1  1  2  0  0  1  3  1  1 24   3.1254     133
  2  1  1 24  0  0  0  3  1  1  2   3.1254     133
  3  1  1  2  0  0  0  2  1  1 24   3.1254     133
  3  1  1 24  0  0 -1  2  1  1  2   3.1254     133
  2  2  1  2  0  0  1  3  2  1 24   3.1254     136
  3  2  1 24  0  0 -1  2  2  1  2   3.1254     136
  1  1  1 24  0  0  1  4  1  1  2   3.1254     133
  4  1  1  2  0  0 -1  1  1  1 24   3.1254     133
  2  1  1 24  0  0  0  3  2  1  2   3.1254     134
  3  1  1 24  0  0 -1  2  2  1  2   3.1254     134
  4  1  1  2  0  0 -1  1  2  1 24   3.1254     134
  1  2  1 24  0  0  1  4  1  1  2   3.1254     135
  2  2  1  2  0  0  1  3  1  1 24   3.1254     135
  3  2  1  2  0  0  0  2  1  1 24   3.1254     135
  4  2  1  2  0  0 -1  1  1  1 24   3.1254     135
  2  2  1 24  0  0  0  3  2  1  2   3.1254     136
  3  2  1  2  0  0  0  2  2  1 24   3.1254     136
  4  2  1  2  0  0 -1  1  2  1 24   3.1254     136
  1  1  1 24  0  0  1  4  2  1  2   3.1254     134
  1  2  1 24  0  0  1  4  2  1  2   3.1254     136
  1  1  1 23  2  0  1  3  2  1 21   3.1303     134
  3  2  1 21 -2  0 -1  1  1  1 23   3.1303     135
  2  1  1 23 -2  1  0  4  2  1 21   3.1303     134
  3  1  1 23 -2  0 -1  1  2  1 21   3.1303     134
  4  1  1 23  2 -1  0  2  2  1 21   3.1303     134
  1  2  1 21  2  0  1  3  1  1 23   3.1303     135
  2  2  1 21 -2  1  0  4  1  1 23   3.1303     135
  4  2  1 21  2 -1  0  2  1  1 23   3.1303     135
  1  2  1 21  2  0  1  3  2  1 23   3.1303     136
  1  2  1 23  2  0  1  3  2  1 21   3.1303     136
  2  2  1 23 -2  1  0  4  2  1 21   3.1303     136
  3  2  1 21 -2  0 -1  1  2  1 23   3.1303     136
  3  2  1 23 -2  0 -1  1  2  1 21   3.1303     136
  4  2  1 21  2 -1  0  2  2  1 23   3.1303     136
  2  2  1 21 -2  1  0  4  2  1 23   3.1304     136
  4  2  1 23  2 -1  0  2  2  1 21   3.1304     136
  3  1  1 12  0  0  0  4  1  1 26   3.1350     137
  4  1  1 26  0  0  0  3  1  1 12   3.1350     137
  3  1  1 26  0  1  0  4  2  1 12   3.1350     138
  4  1  1 26  0  0  0  3  2  1 12   3.1350     138
  3  2  1 12  0  0  0  4  1  1 26   3.1350     139
  4  2  1 12  0 -1  0  3  1  1 26   3.1350     139
  1  1  1 12  0  0  0  2  1  1 26   3.1350     137
  1  1  1 26  0 -1  0  2  1  1 12   3.1350     137
  2  1  1 12  0  1  0  1  1  1 26   3.1350     137
  2  1  1 26  0  0  0  1  1  1 12   3.1350     137
  3  1  1 26  0  1  0  4  1  1 12   3.1350     137
  4  1  1 12  0 -1  0  3  1  1 26   3.1350     137
  1  1  1 26  0 -1  0  2  2  1 12   3.1350     138
  2  1  1 26  0  0  0  1  2  1 12   3.1350     138
  1  2  1 12  0  0  0  2  1  1 26   3.1350     139
  2  2  1 12  0  1  0  1  1  1 26   3.1350     139
  2  1  1 23 -1  0  0  3  1  1 12   3.1483     141
  3  1  1 12  1  0  0  2  1  1 23   3.1483     141
  2  1  1 23 -1  0  0  3  2  1 12   3.1483     142
  3  2  1 12  1  0  0  2  1  1 23   3.1483     143
  1  1  1 12 -1  0  0  4  1  1 23   3.1483     141
  1  1  1 23  1  0  1  4  1  1 12   3.1483     141
  4  1  1 12 -1  0 -1  1  1  1 23   3.1483     141
  4  1  1 23  1  0  0  1  1  1 12   3.1483     141
  1  1  1 12 -1  0  0  4  2  1 23   3.1483     142
  1  1  1 23  1  0  1  4  2  1 12   3.1483     142
  3  1  1 12  1  0  0  2  2  1 23   3.1483     142
  4  1  1 12 -1  0 -1  1  2  1 23   3.1483     142
  4  1  1 23  1  0  0  1  2  1 12   3.1483     142
  1  2  1 12 -1  0  0  4  1  1 23   3.1483     143
  1  2  1 23  1  0  1  4  1  1 12   3.1483     143
  2  2  1 23 -1  0  0  3  1  1 12   3.1483     143
  4  2  1 12 -1  0 -1  1  1  1 23   3.1483     143
  4  2  1 23  1  0  0  1  1  1 12   3.1483     143
  1  2  1 12 -1  0  0  4  2  1 23   3.1483     144
  1  2  1 23  1  0  1  4  2  1 12   3.1483     144
  2  2  1 12  1  0  1  3  2  1 23   3.1483     144
  2  2  1 23 -1  0  0  3  2  1 12   3.1483     144
  3  2  1 12  1  0  0  2  2  1 23   3.1483     144
  3  2  1 23 -1  0 -1  2  2  1 12   3.1483     144
  4  2  1 12 -1  0 -1  1  2  1 23   3.1483     144
  4  2  1 23  1  0  0  1  2  1 12   3.1483     144
  2  1  1 12  1  0  1  3  1  1 23   3.1483     141
  3  1  1 23 -1  0 -1  2  1  1 12   3.1483     141
  2  1  1 12  1  0  1  3  2  1 23   3.1483     142
  3  1  1 23 -1  0 -1  2  2  1 12   3.1483     142
  2  2  1 12  1  0  1  3  1  1 23   3.1483     143
  3  2  1 23 -1  0 -1  2  1  1 12   3.1483     143
  1  1  1  5  1  0  1  4  1  1 17   3.1504     141
  2  1  1  5 -1  0  0  3  1  1 17   3.1504     141
  3  1  1 17  1  0  0  2  1  1  5   3.1504     141
  4  1  1 17 -1  0 -1  1  1  1  5   3.1504     141
  2  1  1  5 -1  0  0  3  2  1 17   3.1504     142
  3  1  1 17  1  0  0  2  2  1  5   3.1504     142
  4  1  1 17 -1  0 -1  1  2  1  5   3.1504     142
  1  2  1  5  1  0  1  4  1  1 17   3.1504     143
  2  2  1  5 -1  0  0  3  1  1 17   3.1504     143
  3  2  1 17  1  0  0  2  1  1  5   3.1504     143
  2  2  1  5 -1  0  0  3  2  1 17   3.1504     144
  3  2  1 17  1  0  0  2  2  1  5   3.1504     144
  1  1  1 17 -1  0  0  4  1  1  5   3.1504     141
  2  1  1 17  1  0  1  3  1  1  5   3.1504     141
  3  1  1  5 -1  0 -1  2  1  1 17   3.1504     141
  4  1  1  5  1  0  0  1  1  1 17   3.1504     141
  1  1  1  5  1  0  1  4  2  1 17   3.1504     142
  1  1  1 17 -1  0  0  4  2  1  5   3.1504     142
  2  1  1 17  1  0  1  3  2  1  5   3.1504     142
  3  1  1  5 -1  0 -1  2  2  1 17   3.1504     142
  4  1  1  5  1  0  0  1  2  1 17   3.1504     142
  1  2  1 17 -1  0  0  4  1  1  5   3.1504     143
  2  2  1 17  1  0  1  3  1  1  5   3.1504     143
  3  2  1  5 -1  0 -1  2  1  1 17   3.1504     143
  4  2  1  5  1  0  0  1  1  1 17   3.1504     143
  4  2  1 17 -1  0 -1  1  1  1  5   3.1504     143
  1  2  1  5  1  0  1  4  2  1 17   3.1504     144
  1  2  1 17 -1  0  0  4  2  1  5   3.1504     144
  2  2  1 17  1  0  1  3  2  1  5   3.1504     144
  3  2  1  5 -1  0 -1  2  2  1 17   3.1504     144
  4  2  1  5  1  0  0  1  2  1 17   3.1504     144
  4  2  1 17 -1  0 -1  1  2  1  5   3.1504     144
  4  1  1 16  1  0  0  3  2  1 28   3.1555     146
  3  2  1 28 -1  0  0  4  1  1 16   3.1555     147
  3  2  1 16 -1  1  0  4  2  1 28   3.1555     148
  4  2  1 28  1 -1  0  3  2  1 16   3.1555     148
  1  1  1 16  1 -1  0  2  2  1 28   3.1555     146
  2  1  1 16 -1  0  0  1  2  1 28   3.1555     146
  3  1  1 16 -1  1  0  4  2  1 28   3.1555     146
  1  2  1 28  1  0  0  2  1  1 16   3.1555     147
  2  2  1 28 -1  1  0  1  1  1 16   3.1555     147
  4  2  1 28  1 -1  0  3  1  1 16   3.1555     147
  1  2  1 16  1 -1  0  2  2  1 28   3.1555     148
  1  2  1 28  1  0  0  2  2  1 16   3.1555     148
  2  2  1 16 -1  0  0  1  2  1 28   3.1555     148
  2  2  1 28 -1  1  0  1  2  1 16   3.1555     148
  3  2  1 28 -1  0  0  4  2  1 16   3.1555     148
  4  2  1 16  1  0  0  3  2  1 28   3.1555     148
  3  1  1  8 -1  1  0  4  1  1 18   3.1567     145
  4  1  1 18  1 -1  0  3  1  1  8   3.1567     145
  4  1  1 18  1 -1  0  3  2  1  8   3.1567     146
  3  2  1  8 -1  1  0  4  1  1 18   3.1567     147
  1  1  1  8  1 -1  0  2  1  1 18   3.1567     145
  1  1  1 18  1  0  0  2  1  1  8   3.1567     145
  2  1  1  8 -1  0  0  1  1  1 18   3.1567     145
  2  1  1 18 -1  1  0  1  1  1  8   3.1567     145
  2  1  1  8 -1  0  0  1  2  1 18   3.1567     146
  2  1  1 18 -1  1  0  1  2  1  8   3.1567     146
  3  1  1  8 -1  1  0  4  2  1 18   3.1567     146
  4  1  1  8  1  0  0  3  2  1 18   3.1567     146
  1  2  1  8  1 -1  0  2  1  1 18   3.1567     147
  1  2  1 18  1  0  0  2  1  1  8   3.1567     147
  3  2  1 18 -1  0  0  4  1  1  8   3.1567     147
  4  2  1 18  1 -1  0  3  1  1  8   3.1567     147
  3  2  1  8 -1  1  0  4  2  1 18   3.1567     148
  4  2  1 18  1 -1  0  3  2  1  8   3.1567     148
  3  1  1 18 -1  0  0  4  1  1  8   3.1567     145
  4  1  1  8  1  0  0  3  1  1 18   3.1567     145
  1  1  1  8  1 -1  0  2  2  1 18   3.1567     146
  1  1  1 18  1  0  0  2  2  1  8   3.1567     146
  2  2  1  8 -1  0  0  1  1  1 18   3.1567     147
  2  2  1 18 -1  1  0  1  1  1  8   3.1567     147
  1  2  1  8  1 -1  0  2  2  1 18   3.1567     148
  1  2  1 18  1  0  0  2  2  1  8   3.1567     148
  2  2  1  8 -1  0  0  1  2  1 18   3.1567     148
  2  2  1 18 -1  1  0  1  2  1  8   3.1567     148
  3  2  1 18 -1  0  0  4  2  1  8   3.1567     148
  4  2  1  8  1  0  0  3  2  1 18   3.1567     148
  3  1  1 18 -1  0  0  4  2  1  8   3.1567     146
  4  2  1  8  1  0  0  3  1  1 18   3.1567     147
  1  1  1 18  0  0  0  2  1  1 16   3.1676     149
  2  1  1 16  0  0  0  1  1  1 18   3.1676     149
  1  1  1 16  0 -1  0  2  2  1 18   3.1676     150
  1  1  1 18  0  0  0  2  2  1 16   3.1676     150
  2  1  1 16  0  0  0  1  2  1 18   3.1676     150
  1  2  1 18  0  0  0  2  1  1 16   3.1676     151
  2  2  1 16  0  0  0  1  1  1 18   3.1676     151
  2  2  1 18  0  1  0  1  1  1 16   3.1676     151
  1  2  1 16  0 -1  0  2  2  1 18   3.1676     152
  1  2  1 18  0  0  0  2  2  1 16   3.1676     152
  2  2  1 16  0  0  0  1  2  1 18   3.1676     152
  2  2  1 18  0  1  0  1  2  1 16   3.1676     152
  1  1  1 16  0 -1  0  2  1  1 18   3.1676     149
  2  1  1 18  0  1  0  1  1  1 16   3.1676     149
  2  1  1 18  0  1  0  1  2  1 16   3.1676     150
  3  1  1 16  0  1  0  4  2  1 18   3.1676     150
  3  1  1 18  0  0  0  4  2  1 16   3.1676     150
  4  1  1 16  0  0  0  3  2  1 18   3.1676     150
  1  2  1 16  0 -1  0  2  1  1 18   3.1676     151
  3  2  1 18  0  0  0  4  1  1 16   3.1676     151
  4  2  1 16  0  0  0  3  1  1 18   3.1676     151
  4  2  1 18  0 -1  0  3  1  1 16   3.1676     151
  3  2  1 16  0  1  0  4  2  1 18   3.1676     152
  3  2  1 18  0  0  0  4  2  1 16   3.1676     152
  4  2  1 16  0  0  0  3  2  1 18   3.1676     152
  4  2  1 18  0 -1  0  3  2  1 16   3.1676     152
  3  1  1 16  0  1  0  4  1  1 18   3.1676     149
  3  1  1 18  0  0  0  4  1  1 16   3.1676     149
  4  1  1 16  0  0  0  3  1  1 18   3.1676     149
  4  1  1 18  0 -1  0  3  1  1 16   3.1676     149
  4  1  1 18  0 -1  0  3  2  1 16   3.1676     150
  3  2  1 16  0  1  0  4  1  1 18   3.1676     151
  1  1  1 12 -1  0  0  1  2  1 27   3.1687     150
  2  1  1 12  1  0  0  2  2  1 27   3.1687     150
  1  2  1 27  1  0  0  1  1  1 12   3.1687     151
  2  2  1 27 -1  0  0  2  1  1 12   3.1687     151
  1  2  1 12 -1  0  0  1  2  1 27   3.1687     152
  1  2  1 27  1  0  0  1  2  1 12   3.1687     152
  2  2  1 12  1  0  0  2  2  1 27   3.1687     152
  2  2  1 27 -1  0  0  2  2  1 12   3.1687     152
  4  2  1 12 -1  0  0  4  2  1 27   3.1687     152
  4  2  1 27  1  0  0  4  2  1 12   3.1687     152
  3  1  1 12  1  0  0  3  2  1 27   3.1688     150
  3  2  1 27 -1  0  0  3  1  1 12   3.1688     151
  3  2  1 12  1  0  0  3  2  1 27   3.1688     152
  3  2  1 27 -1  0  0  3  2  1 12   3.1688     152
  4  1  1 12 -1  0  0  4  2  1 27   3.1688     150
  4  2  1 27  1  0  0  4  1  1 12   3.1688     151
  2  1  1 23 -2  1  0  4  2  1 28   3.1757     154
  4  2  1 28  2 -1  0  2  1  1 23   3.1757     155
  2  2  1 23 -2  1  0  4  2  1 28   3.1757     156
  4  2  1 28  2 -1  0  2  2  1 23   3.1757     156
  1  1  1 23  2  0  1  3  2  1 28   3.1758     154
  3  1  1 23 -2  0 -1  1  2  1 28   3.1758     154
  1  2  1 28  2  0  1  3  1  1 23   3.1758     155
  3  2  1 28 -2  0 -1  1  1  1 23   3.1758     155
  1  2  1 23  2  0  1  3  2  1 28   3.1758     156
  1  2  1 28  2  0  1  3  2  1 23   3.1758     156
  3  2  1 23 -2  0 -1  1  2  1 28   3.1758     156
  3  2  1 28 -2  0 -1  1  2  1 23   3.1758     156
  4  1  1 23  2 -1  0  2  2  1 28   3.1758     154
  2  2  1 28 -2  1  0  4  1  1 23   3.1758     155
  4  2  1 23  2 -1  0  2  2  1 28   3.1758     156
  2  2  1 28 -2  1  0  4  2  1 23   3.1758     156
  3  1  1 13  0  0  0  4  1  1 26   3.1780     153
  4  1  1 26  0  0  0  3  1  1 13   3.1780     153
  1  1  1 26  0 -1  0  2  2  1 13   3.1780     154
  3  1  1 26  0  1  0  4  2  1 13   3.1780     154
  4  1  1 26  0  0  0  3  2  1 13   3.1780     154
  2  2  1 13  0  1  0  1  1  1 26   3.1780     155
  3  2  1 13  0  0  0  4  1  1 26   3.1780     155
  4  2  1 13  0 -1  0  3  1  1 26   3.1780     155
  1  1  1 13  0  0  0  2  1  1 26   3.1780     153
  1  1  1 26  0 -1  0  2  1  1 13   3.1780     153
  2  1  1 13  0  1  0  1  1  1 26   3.1780     153
  2  1  1 26  0  0  0  1  1  1 13   3.1780     153
  3  1  1 26  0  1  0  4  1  1 13   3.1780     153
  4  1  1 13  0 -1  0  3  1  1 26   3.1780     153
  2  1  1 26  0  0  0  1  2  1 13   3.1780     154
  1  2  1 13  0  0  0  2  1  1 26   3.1780     155
  4  2  1 16 -1  0  0  4  2  1 27   3.1795     156
  4  2  1 27  1  0  0  4  2  1 16   3.1795     156
  1  1  1 16 -1  0  0  1  2  1 27   3.1795     154
  2  1  1 16  1  0  0  2  2  1 27   3.1795     154
  3  1  1 16  1  0  0  3  2  1 27   3.1795     154
  1  2  1 27  1  0  0  1  1  1 16   3.1795     155
  2  2  1 27 -1  0  0  2  1  1 16   3.1795     155
  3  2  1 27 -1  0  0  3  1  1 16   3.1795     155
  1  2  1 16 -1  0  0  1  2  1 27   3.1795     156
  1  2  1 27  1  0  0  1  2  1 16   3.1795     156
  2  2  1 16  1  0  0  2  2  1 27   3.1795     156
  2  2  1 27 -1  0  0  2  2  1 16   3.1795     156
  4  1  1 16 -1  0  0  4  2  1 27   3.1795     154
  4  2  1 27  1  0  0  4  1  1 16   3.1795     155
  3  2  1 16  1  0  0  3  2  1 27   3.1795     156
  3  2  1 27 -1  0  0  3  2  1 16   3.1795     156
  1  1  1 27  1 -1  0  2  1  1 19   3.1818     157
  2  1  1 19 -1  1  0  1  1  1 27   3.1818     157
  3  1  1 19 -1  0  0  4  1  1 27   3.1818     157
  3  1  1 27 -1  1  0  4  1  1 19   3.1818     157
  4  1  1 19  1 -1  0  3  1  1 27   3.1818     157
  4  1  1 27  1  0  0  3  1  1 19   3.1818     157
  1  1  1 19  1  0  0  2  1  1 27   3.1818     157
  2  1  1 27 -1  0  0  1  1  1 19   3.1818     157
  1  1  1 27  1 -1  0  2  2  1 19   3.1818     158
  3  1  1 27 -1  1  0  4  2  1 19   3.1818     158
  4  1  1 27  1  0  0  3  2  1 19   3.1818     158
  2  2  1 19 -1  1  0  1  1  1 27   3.1818     159
  3  2  1 19 -1  0  0  4  1  1 27   3.1818     159
  4  2  1 19  1 -1  0  3  1  1 27   3.1818     159
  2  1  1 27 -1  0  0  1  2  1 19   3.1819     158
  1  2  1 19  1  0  0  2  1  1 27   3.1819     159
  1  1  1  9  1  0  1  3  2  1 26   3.1892     162
  2  1  1  9 -1  1  0  4  2  1 26   3.1892     162
  3  2  1 26 -1  0 -1  1  1  1  9   3.1892     163
  4  2  1 26  1 -1  0  2  1  1  9   3.1892     163
  1  2  1  9  1  0  1  3  2  1 26   3.1892     164
  2  2  1  9 -1  1  0  4  2  1 26   3.1892     164
  3  2  1 26 -1  0 -1  1  2  1  9   3.1892     164
  4  2  1 26  1 -1  0  2  2  1  9   3.1892     164
  2  2  1 26 -1  1  0  4  2  1  9   3.1892     164
  4  2  1  9  1 -1  0  2  2  1 26   3.1892     164
  3  1  1  9 -1  0 -1  1  2  1 26   3.1892     162
  4  1  1  9  1 -1  0  2  2  1 26   3.1892     162
  1  2  1 26  1  0  1  3  1  1  9   3.1892     163
  2  2  1 26 -1  1  0  4  1  1  9   3.1892     163
  1  2  1 26  1  0  1  3  2  1  9   3.1892     164
  3  2  1  9 -1  0 -1  1  2  1 26   3.1892     164
  2  1  1 22 -1  0  0  2  1  1 26   3.2012     165
  2  1  1 26  1  0  0  2  1  1 22   3.2012     165
  3  1  1 22 -1  0  0  3  1  1 26   3.2012     165
  3  1  1 26  1  0  0  3  1  1 22   3.2012     165
  2  1  1 26  1  0  0  2  2  1 22   3.2012     166
  2  2  1 22 -1  0  0  2  1  1 26   3.2012     167
  1  1  1 22  1  0  0  1  1  1 26   3.2012     165
  1  1  1 26 -1  0  0  1  1  1 22   3.2012     165
  1  1  1 26 -1  0  0  1  2  1 22   3.2012     166
  1  2  1 22  1  0  0  1  1  1 26   3.2012     167
  3  1  1 26  1  0  0  3  2  1 22   3.2012     166
  3  2  1 22 -1  0  0  3  1  1 26   3.2012     167
  4  1  1 22  1  0  0  4  1  1 26   3.2012     165
  4  1  1 26 -1  0  0  4  1  1 22   3.2012     165
  4  1  1 26 -1  0  0  4  2  1 22   3.2012     166
  4  2  1 22  1  0  0  4  1  1 26   3.2012     167
  1  1  1 23  2  0  1  3  2  1 27   3.2109     170
  3  2  1 27 -2  0 -1  1  1  1 23   3.2109     171
  4  1  1 23  2 -1  0  2  2  1 27   3.2109     170
  2  2  1 27 -2  1  0  4  1  1 23   3.2109     171
  4  2  1 27  2 -1  0  2  1  1 23   3.2109     171
  1  2  1 23  2  0  1  3  2  1 27   3.2109     172
  2  2  1 23 -2  1  0  4  2  1 27   3.2109     172
  3  2  1 27 -2  0 -1  1  2  1 23   3.2109     172
  4  2  1 27  2 -1  0  2  2  1 23   3.2109     172
  2  1  1 23 -2  1  0  4  2  1 27   3.2109     170
  3  1  1 23 -2  0 -1  1  2  1 27   3.2109     170
  1  2  1 27  2  0  1  3  1  1 23   3.2109     171
  1  2  1 27  2  0  1  3  2  1 23   3.2109     172
  3  2  1 23 -2  0 -1  1  2  1 27   3.2109     172
  2  2  1 27 -2  1  0  4  2  1 23   3.2109     172
  4  2  1 23  2 -1  0  2  2  1 27   3.2109     172
  4  1  1 26  1  0  0  3  2  1 27   3.2138     170
  3  2  1 27 -1  0  0  4  1  1 26   3.2138     171
  1  1  1 26  1 -1  0  2  2  1 27   3.2138     170
  2  1  1 26 -1  0  0  1  2  1 27   3.2138     170
  1  2  1 27  1  0  0  2  1  1 26   3.2138     171
  2  2  1 27 -1  1  0  1  1  1 26   3.2138     171
  3  1  1 26 -1  1  0  4  2  1 27   3.2138     170
  4  2  1 27  1 -1  0  3  1  1 26   3.2138     171
  3  1  1  6 -1  1  0  4  1  1 18   3.2166     173
  4  1  1 18  1 -1  0  3  1  1  6   3.2166     173
  1  1  1  6  1 -1  0  2  1  1 18   3.2166     173
  1  1  1 18  1  0  0  2  1  1  6   3.2166     173
  2  1  1  6 -1  0  0  1  1  1 18   3.2166     173
  2  1  1 18 -1  1  0  1  1  1  6   3.2166     173
  2  1  1  6 -1  0  0  1  2  1 18   3.2166     174
  2  1  1 18 -1  1  0  1  2  1  6   3.2166     174
  3  1  1  6 -1  1  0  4  2  1 18   3.2166     174
  4  1  1 18  1 -1  0  3  2  1  6   3.2166     174
  1  2  1  6  1 -1  0  2  1  1 18   3.2166     175
  1  2  1 18  1  0  0  2  1  1  6   3.2166     175
  3  2  1  6 -1  1  0  4  1  1 18   3.2166     175
  4  2  1 18  1 -1  0  3  1  1  6   3.2166     175
  3  1  1 18 -1  0  0  4  1  1  6   3.2166     173
  4  1  1  6  1  0  0  3  1  1 18   3.2166     173
  1  1  1  6  1 -1  0  2  2  1 18   3.2166     174
  1  1  1 18  1  0  0  2  2  1  6   3.2166     174
  3  1  1 18 -1  0  0  4  2  1  6   3.2166     174
  2  2  1  6 -1  0  0  1  1  1 18   3.2166     175
  2  2  1 18 -1  1  0  1  1  1  6   3.2166     175
  4  2  1  6  1  0  0  3  1  1 18   3.2166     175
  1  2  1  6  1 -1  0  2  2  1 18   3.2166     176
  1  2  1 18  1  0  0  2  2  1  6   3.2166     176
  2  2  1  6 -1  0  0  1  2  1 18   3.2166     176
  2  2  1 18 -1  1  0  1  2  1  6   3.2166     176
  3  2  1  6 -1  1  0  4  2  1 18   3.2166     176
  4  2  1 18  1 -1  0  3  2  1  6   3.2166     176
  4  1  1  6  1  0  0  3  2  1 18   3.2166     174
  3  2  1 18 -1  0  0  4  1  1  6   3.2166     175
  3  2  1 18 -1  0  0  4  2  1  6   3.2166     176
  4  2  1  6  1  0  0  3  2  1 18   3.2166     176
  2  1  1 24 -1  0  0  3  1  1 16   3.2177     173
  3  1  1 16  1  0  0  2  1  1 24   3.2177     173
  1  1  1 24  1  0  1  4  2  1 16   3.2177     174
  3  1  1 16  1  0  0  2  2  1 24   3.2177     174
  2  2  1 24 -1  0  0  3  1  1 16   3.2177     175
  4  2  1 16 -1  0 -1  1  1  1 24   3.2177     175
  1  2  1 24  1  0  1  4  2  1 16   3.2177     176
  2  2  1 24 -1  0  0  3  2  1 16   3.2177     176
  3  2  1 16  1  0  0  2  2  1 24   3.2177     176
  4  2  1 16 -1  0 -1  1  2  1 24   3.2177     176
  1  1  1 16 -1  0  0  4  1  1 24   3.2177     173
  1  1  1 24  1  0  1  4  1  1 16   3.2177     173
  4  1  1 16 -1  0 -1  1  1  1 24   3.2177     173
  4  1  1 24  1  0  0  1  1  1 16   3.2177     173
  2  1  1 24 -1  0  0  3  2  1 16   3.2177     174
  4  1  1 16 -1  0 -1  1  2  1 24   3.2177     174
  4  1  1 24  1  0  0  1  2  1 16   3.2177     174
  1  2  1 16 -1  0  0  4  1  1 24   3.2177     175
  1  2  1 24  1  0  1  4  1  1 16   3.2177     175
  3  2  1 16  1  0  0  2  1  1 24   3.2177     175
  2  1  1 16  1  0  1  3  1  1 24   3.2178     173
  3  1  1 24 -1  0 -1  2  1  1 16   3.2178     173
  1  1  1 16 -1  0  0  4  2  1 24   3.2178     174
  2  1  1 16  1  0  1  3  2  1 24   3.2178     174
  3  1  1 24 -1  0 -1  2  2  1 16   3.2178     174
  2  2  1 16  1  0  1  3  1  1 24   3.2178     175
  3  2  1 24 -1  0 -1  2  1  1 16   3.2178     175
  4  2  1 24  1  0  0  1  1  1 16   3.2178     175
  1  2  1 16 -1  0  0  4  2  1 24   3.2178     176
  2  2  1 16  1  0  1  3  2  1 24   3.2178     176
  3  2  1 24 -1  0 -1  2  2  1 16   3.2178     176
  4  2  1 24  1  0  0  1  2  1 16   3.2178     176
  1  1  1 11 -1  0  0  4  1  1 23   3.2262     177
  1  1  1 23  1  0  1  4  1  1 11   3.2262     177
  2  1  1 23 -1  0  0  3  1  1 11   3.2262     177
  3  1  1 11  1  0  0  2  1  1 23   3.2262     177
  4  1  1 11 -1  0 -1  1  1  1 23   3.2262     177
  4  1  1 23  1  0  0  1  1  1 11   3.2262     177
  1  1  1 11 -1  0  0  4  2  1 23   3.2262     178
  2  1  1 23 -1  0  0  3  2  1 11   3.2262     178
  3  1  1 11  1  0  0  2  2  1 23   3.2262     178
  4  1  1 11 -1  0 -1  1  2  1 23   3.2262     178
  4  1  1 23  1  0  0  1  2  1 11   3.2262     178
  1  2  1 11 -1  0  0  4  1  1 23   3.2262     179
  1  2  1 23  1  0  1  4  1  1 11   3.2262     179
  2  2  1 23 -1  0  0  3  1  1 11   3.2262     179
  3  2  1 11  1  0  0  2  1  1 23   3.2262     179
  4  2  1 11 -1  0 -1  1  1  1 23   3.2262     179
  4  2  1 23  1  0  0  1  1  1 11   3.2262     179
  1  2  1 11 -1  0  0  4  2  1 23   3.2262     180
  2  2  1 23 -1  0  0  3  2  1 11   3.2262     180
  3  2  1 11  1  0  0  2  2  1 23   3.2262     180
  4  2  1 23  1  0  0  1  2  1 11   3.2262     180
  1  1  1 23  1  0  1  4  2  1 11   3.2262     178
  2  1  1 11  1  0  1  3  2  1 23   3.2262     178
  3  2  1 23 -1  0 -1  2  1  1 11   3.2262     179
  1  2  1 23  1  0  1  4  2  1 11   3.2262     180
  2  2  1 11  1  0  1  3  2  1 23   3.2262     180
  3  2  1 23 -1  0 -1  2  2  1 11   3.2262     180
  4  2  1 11 -1  0 -1  1  2  1 23   3.2262     180
  2  1  1 11  1  0  1  3  1  1 23   3.2262     177
  3  1  1 23 -1  0 -1  2  1  1 11   3.2262     177
  3  1  1 23 -1  0 -1  2  2  1 11   3.2262     178
  2  2  1 11  1  0  1  3  1  1 23   3.2262     179
  1  1  1 19  1  0  0  2  1  1  3   3.2558     181
  2  1  1  3 -1  0  0  1  1  1 19   3.2558     181
  3  1  1  3 -1  1  0  4  1  1 19   3.2558     181
  4  1  1 19  1 -1  0  3  1  1  3   3.2558     181
  1  1  1 19  1  0  0  2  2  1  3   3.2558     182
  2  1  1  3 -1  0  0  1  2  1 19   3.2558     182
  3  1  1  3 -1  1  0  4  2  1 19   3.2558     182
  3  1  1 19 -1  0  0  4  2  1  3   3.2558     182
  1  2  1 19  1  0  0  2  1  1  3   3.2558     183
  2  2  1  3 -1  0  0  1  1  1 19   3.2558     183
  4  2  1  3  1  0  0  3  1  1 19   3.2558     183
  4  2  1 19  1 -1  0  3  1  1  3   3.2558     183
  1  2  1 19  1  0  0  2  2  1  3   3.2558     184
  2  2  1  3 -1  0  0  1  2  1 19   3.2558     184
  1  1  1  3  1 -1  0  2  1  1 19   3.2558     181
  2  1  1 19 -1  1  0  1  1  1  3   3.2558     181
  3  1  1 19 -1  0  0  4  1  1  3   3.2558     181
  4  1  1  3  1  0  0  3  1  1 19   3.2558     181
  1  1  1  3  1 -1  0  2  2  1 19   3.2558     182
  2  1  1 19 -1  1  0  1  2  1  3   3.2558     182
  4  1  1  3  1  0  0  3  2  1 19   3.2558     182
  4  1  1 19  1 -1  0  3  2  1  3   3.2558     182
  1  2  1  3  1 -1  0  2  1  1 19   3.2558     183
  2  2  1 19 -1  1  0  1  1  1  3   3.2558     183
  3  2  1  3 -1  1  0  4  1  1 19   3.2558     183
  3  2  1 19 -1  0  0  4  1  1  3   3.2558     183
  1  2  1  3  1 -1  0  2  2  1 19   3.2558     184
  2  2  1 19 -1  1  0  1  2  1  3   3.2558     184
  3  2  1  3 -1  1  0  4  2  1 19   3.2558     184
  3  2  1 19 -1  0  0  4  2  1  3   3.2558     184
  4  2  1  3  1  0  0  3  2  1 19   3.2558     184
  4  2  1 19  1 -1  0  3  2  1  3   3.2558     184
  1  1  1 25  0  0  1  4  1  1 18   3.2573     181
  4  1  1 18  0  0 -1  1  1  1 25   3.2573     181
  4  1  1 18  0  0 -1  1  2  1 25   3.2573     182
  1  2  1 25  0  0  1  4  1  1 18   3.2573     183
  1  1  1 18  0  0  0  4  1  1 25   3.2573     181
  4  1  1 25  0  0  0  1  1  1 18   3.2573     181
  1  1  1 18  0  0  0  4  2  1 25   3.2573     182
  1  1  1 25  0  0  1  4  2  1 18   3.2573     182
  2  1  1 18  0  0  1  3  2  1 25   3.2573     182
  4  1  1 25  0  0  0  1  2  1 18   3.2573     182
  1  2  1 18  0  0  0  4  1  1 25   3.2573     183
  3  2  1 25  0  0 -1  2  1  1 18   3.2573     183
  4  2  1 18  0  0 -1  1  1  1 25   3.2573     183
  4  2  1 25  0  0  0  1  1  1 18   3.2573     183
  1  2  1 18  0  0  0  4  2  1 25   3.2573     184
  1  2  1 25  0  0  1  4  2  1 18   3.2573     184
  2  2  1 18  0  0  1  3  2  1 25   3.2573     184
  3  2  1 25  0  0 -1  2  2  1 18   3.2573     184
  4  2  1 18  0  0 -1  1  2  1 25   3.2573     184
  4  2  1 25  0  0  0  1  2  1 18   3.2573     184
  2  1  1 18  0  0  1  3  1  1 25   3.2573     181
  2  1  1 25  0  0  0  3  1  1 18   3.2573     181
  3  1  1 18  0  0  0  2  1  1 25   3.2573     181
  3  1  1 25  0  0 -1  2  1  1 18   3.2573     181
  2  1  1 25  0  0  0  3  2  1 18   3.2573     182
  3  1  1 18  0  0  0  2  2  1 25   3.2573     182
  3  1  1 25  0  0 -1  2  2  1 18   3.2573     182
  2  2  1 18  0  0  1  3  1  1 25   3.2573     183
  2  2  1 25  0  0  0  3  1  1 18   3.2573     183
  3  2  1 18  0  0  0  2  1  1 25   3.2573     183
  2  2  1 25  0  0  0  3  2  1 18   3.2573     184
  3  2  1 18  0  0  0  2  2  1 25   3.2573     184
  3  1  1  7 -1  1  0  4  1  1 18   3.2645     185
  4  1  1 18  1 -1  0  3  1  1  7   3.2645     185
  4  1  1 18  1 -1  0  3  2  1  7   3.2645     186
  3  2  1  7 -1  1  0  4  1  1 18   3.2645     187
  1  1  1  7  1 -1  0  2  1  1 18   3.2645     185
  1  1  1 18  1  0  0  2  1  1  7   3.2645     185
  2  1  1  7 -1  0  0  1  1  1 18   3.2645     185
  2  1  1 18 -1  1  0  1  1  1  7   3.2645     185
  2  1  1 18 -1  1  0  1  2  1  7   3.2645     186
  3  1  1  7 -1  1  0  4  2  1 18   3.2645     186
  1  2  1  7  1 -1  0  2  1  1 18   3.2645     187
  4  2  1 18  1 -1  0  3  1  1  7   3.2645     187
  3  2  1  7 -1  1  0  4  2  1 18   3.2645     188
  4  2  1 18  1 -1  0  3  2  1  7   3.2645     188
  3  1  1 18 -1  0  0  4  1  1  7   3.2645     185
  4  1  1  7  1  0  0  3  1  1 18   3.2645     185
  1  1  1  7  1 -1  0  2  2  1 18   3.2645     186
  1  1  1 18  1  0  0  2  2  1  7   3.2645     186
  2  1  1  7 -1  0  0  1  2  1 18   3.2645     186
  4  1  1  7  1  0  0  3  2  1 18   3.2645     186
  1  2  1 18  1  0  0  2  1  1  7   3.2645     187
  2  2  1  7 -1  0  0  1  1  1 18   3.2645     187
  2  2  1 18 -1  1  0  1  1  1  7   3.2645     187
  3  2  1 18 -1  0  0  4  1  1  7   3.2645     187
  1  2  1  7  1 -1  0  2  2  1 18   3.2645     188
  1  2  1 18  1  0  0  2  2  1  7   3.2645     188
  2  2  1  7 -1  0  0  1  2  1 18   3.2645     188
  2  2  1 18 -1  1  0  1  2  1  7   3.2645     188
  3  1  1 18 -1  0  0  4  2  1  7   3.2645     186
  4  2  1  7  1  0  0  3  1  1 18   3.2645     187
  3  2  1 18 -1  0  0  4  2  1  7   3.2645     188
  4  2  1  7  1  0  0  3  2  1 18   3.2645     188
  1  1  1 19  0  0  0  4  2  1 24   3.2685     186
  2  1  1 19  0  0  1  3  2  1 24   3.2685     186
  3  2  1 24  0  0 -1  2  1  1 19   3.2685     187
  4  2  1 24  0  0  0  1  1  1 19   3.2685     187
  1  2  1 19  0  0  0  4  2  1 24   3.2685     188
  4  2  1 24  0  0  0  1  2  1 19   3.2685     188
  1  1  1 19  0  0  0  4  1  1 24   3.2685     185
  1  1  1 24  0  0  1  4  1  1 19   3.2685     185
  2  1  1 19  0  0  1  3  1  1 24   3.2685     185
  2  1  1 24  0  0  0  3  1  1 19   3.2685     185
  3  1  1 19  0  0  0  2  1  1 24   3.2685     185
  3  1  1 24  0  0 -1  2  1  1 19   3.2685     185
  4  1  1 19  0  0 -1  1  1  1 24   3.2685     185
  4  1  1 24  0  0  0  1  1  1 19   3.2685     185
  1  1  1 24  0  0  1  4  2  1 19   3.2685     186
  3  1  1 19  0  0  0  2  2  1 24   3.2685     186
  4  1  1 19  0  0 -1  1  2  1 24   3.2685     186
  4  1  1 24  0  0  0  1  2  1 19   3.2685     186
  1  2  1 19  0  0  0  4  1  1 24   3.2685     187
  1  2  1 24  0  0  1  4  1  1 19   3.2685     187
  2  2  1 24  0  0  0  3  1  1 19   3.2685     187
  4  2  1 19  0  0 -1  1  1  1 24   3.2685     187
  1  2  1 24  0  0  1  4  2  1 19   3.2685     188
  2  2  1 19  0  0  1  3  2  1 24   3.2685     188
  3  2  1 24  0  0 -1  2  2  1 19   3.2685     188
  4  2  1 19  0  0 -1  1  2  1 24   3.2685     188
  2  1  1 24  0  0  0  3  2  1 19   3.2686     186
  3  1  1 24  0  0 -1  2  2  1 19   3.2686     186
  2  2  1 19  0  0  1  3  1  1 24   3.2686     187
  3  2  1 19  0  0  0  2  1  1 24   3.2686     187
  2  2  1 24  0  0  0  3  2  1 19   3.2686     188
  3  2  1 19  0  0  0  2  2  1 24   3.2686     188
  1  1  1 28  0  0  1  4  1  1 13   3.2775     189
  2  1  1 28  0  0  0  3  1  1 13   3.2775     189
  3  1  1 13  0  0  0  2  1  1 28   3.2775     189
  4  1  1 13  0  0 -1  1  1  1 28   3.2775     189
  1  1  1 13  0  0  0  4  1  1 28   3.2775     189
  2  1  1 13  0  0  1  3  1  1 28   3.2775     189
  3  1  1 28  0  0 -1  2  1  1 13   3.2775     189
  4  1  1 28  0  0  0  1  1  1 13   3.2775     189
  1  1  1 28  0  0  1  4  2  1 13   3.2775     190
  2  1  1 28  0  0  0  3  2  1 13   3.2775     190
  3  1  1 28  0  0 -1  2  2  1 13   3.2775     190
  4  1  1 28  0  0  0  1  2  1 13   3.2775     190
  1  2  1 13  0  0  0  4  1  1 28   3.2775     191
  2  2  1 13  0  0  1  3  1  1 28   3.2775     191
  3  2  1 13  0  0  0  2  1  1 28   3.2775     191
  4  2  1 13  0  0 -1  1  1  1 28   3.2775     191
  1  1  1  5  2  0  1  3  2  1 26   3.3144     194
  2  1  1  5 -2  1  0  4  2  1 26   3.3144     194
  3  1  1  5 -2  0 -1  1  2  1 26   3.3144     194
  1  2  1 26  2  0  1  3  1  1  5   3.3144     195
  3  2  1 26 -2  0 -1  1  1  1  5   3.3144     195
  4  2  1 26  2 -1  0  2  1  1  5   3.3144     195
  1  2  1  5  2  0  1  3  2  1 26   3.3144     196
  2  2  1  5 -2  1  0  4  2  1 26   3.3144     196
  3  2  1 26 -2  0 -1  1  2  1  5   3.3144     196
  4  2  1 26  2 -1  0  2  2  1  5   3.3144     196
  4  1  1  5  2 -1  0  2  2  1 26   3.3144     194
  2  2  1 26 -2  1  0  4  1  1  5   3.3144     195
  1  2  1 26  2  0  1  3  2  1  5   3.3144     196
  3  2  1  5 -2  0 -1  1  2  1 26   3.3144     196
  2  2  1 26 -2  1  0  4  2  1  5   3.3144     196
  4  2  1  5  2 -1  0  2  2  1 26   3.3144     196
  3  1  1 15  0  0  0  2  2  1 25   3.3181     194
  2  2  1 25  0  0  0  3  1  1 15   3.3181     195
  1  1  1 15  0  0  0  4  1  1 25   3.3182     193
  2  1  1 25  0  0  0  3  1  1 15   3.3182     193
  3  1  1 15  0  0  0  2  1  1 25   3.3182     193
  4  1  1 25  0  0  0  1  1  1 15   3.3182     193
  1  1  1 15  0  0  0  4  2  1 25   3.3182     194
  4  1  1 25  0  0  0  1  2  1 15   3.3182     194
  1  2  1 15  0  0  0  4  1  1 25   3.3182     195
  4  2  1 25  0  0  0  1  1  1 15   3.3182     195
  1  2  1 15  0  0  0  4  2  1 25   3.3182     196
  2  2  1 25  0  0  0  3  2  1 15   3.3182     196
  3  2  1 15  0  0  0  2  2  1 25   3.3182     196
  4  2  1 25  0  0  0  1  2  1 15   3.3182     196
  1  1  1 25  0  0  1  4  1  1 15   3.3182     193
  2  1  1 15  0  0  1  3  1  1 25   3.3182     193
  3  1  1 25  0  0 -1  2  1  1 15   3.3182     193
  4  1  1 15  0  0 -1  1  1  1 25   3.3182     193
  1  1  1 25  0  0  1  4  2  1 15   3.3182     194
  2  1  1 15  0  0  1  3  2  1 25   3.3182     194
  2  1  1 25  0  0  0  3  2  1 15   3.3182     194
  4  1  1 15  0  0 -1  1  2  1 25   3.3182     194
  1  2  1 25  0  0  1  4  1  1 15   3.3182     195
  3  2  1 15  0  0  0  2  1  1 25   3.3182     195
  3  2  1 25  0  0 -1  2  1  1 15   3.3182     195
  4  2  1 15  0  0 -1  1  1  1 25   3.3182     195
  1  2  1 25  0  0  1  4  2  1 15   3.3182     196
  2  2  1 15  0  0  1  3  2  1 25   3.3182     196
  3  2  1 25  0  0 -1  2  2  1 15   3.3182     196
  4  2  1 15  0  0 -1  1  2  1 25   3.3182     196
  3  1  1 25  0  0 -1  2  2  1 15   3.3182     194
  2  2  1 15  0  0  1  3  1  1 25   3.3182     195
  1  1  1  7  1 -1  1  3  1  1 27   3.3210     197
  1  1  1 27  1 -1  1  3  1  1  7   3.3210     197
  2  1  1  7 -1  0  0  4  1  1 27   3.3210     197
  3  1  1  7 -1  1 -1  1  1  1 27   3.3210     197
  3  1  1 27 -1  1 -1  1  1  1  7   3.3210     197
  4  1  1 27  1  0  0  2  1  1  7   3.3210     197
  1  1  1 27  1 -1  1  3  2  1  7   3.3210     198
  3  1  1 27 -1  1 -1  1  2  1  7   3.3210     198
  4  1  1 27  1  0  0  2  2  1  7   3.3210     198
  1  2  1  7  1 -1  1  3  1  1 27   3.3210     199
  2  2  1  7 -1  0  0  4  1  1 27   3.3210     199
  3  2  1  7 -1  1 -1  1  1  1 27   3.3210     199
  2  1  1 27 -1  0  0  4  1  1  7   3.3211     197
  4  1  1  7  1  0  0  2  1  1 27   3.3211     197
  2  1  1 27 -1  0  0  4  2  1  7   3.3211     198
  4  2  1  7  1  0  0  2  1  1 27   3.3211     199
  4  1  1 16  1  0  0  3  2  1 27   3.3280     202
  3  2  1 27 -1  0  0  4  1  1 16   3.3280     203
  2  2  1 16 -1  0  0  1  2  1 27   3.3281     204
  3  2  1 16 -1  1  0  4  2  1 27   3.3281     204
  4  2  1 27  1 -1  0  3  2  1 16   3.3281     204
  1  1  1 16  1 -1  0  2  2  1 27   3.3281     202
  2  1  1 16 -1  0  0  1  2  1 27   3.3281     202
  3  1  1 16 -1  1  0  4  2  1 27   3.3281     202
  1  2  1 27  1  0  0  2  1  1 16   3.3281     203
  2  2  1 27 -1  1  0  1  1  1 16   3.3281     203
  4  2  1 27  1 -1  0  3  1  1 16   3.3281     203
  1  2  1 16  1 -1  0  2  2  1 27   3.3281     204
  1  2  1 27  1  0  0  2  2  1 16   3.3281     204
  2  2  1 27 -1  1  0  1  2  1 16   3.3281     204
  3  2  1 27 -1  0  0  4  2  1 16   3.3281     204
  4  2  1 16  1  0  0  3  2  1 27   3.3281     204
  1  1  1 22  2  0  1  3  1  1  4   3.3289     201
  2  1  1  4 -2  1  0  4  1  1 22   3.3289     201
  3  1  1  4 -2  0 -1  1  1  1 22   3.3289     201
  4  1  1  4  2 -1  0  2  1  1 22   3.3289     201
  4  1  1 22  2 -1  0  2  1  1  4   3.3289     201
  1  1  1  4  2  0  1  3  2  1 22   3.3289     202
  1  1  1 22  2  0  1  3  2  1  4   3.3289     202
  4  1  1  4  2 -1  0  2  2  1 22   3.3289     202
  4  1  1 22  2 -1  0  2  2  1  4   3.3289     202
  2  2  1  4 -2  1  0  4  1  1 22   3.3289     203
  2  2  1 22 -2  1  0  4  1  1  4   3.3289     203
  3  2  1  4 -2  0 -1  1  1  1 22   3.3289     203
  3  2  1 22 -2  0 -1  1  1  1  4   3.3289     203
  1  2  1  4  2  0  1  3  2  1 22   3.3289     204
  3  2  1 22 -2  0 -1  1  2  1  4   3.3289     204
  1  1  1  4  2  0  1  3  1  1 22   3.3290     201
  2  1  1 22 -2  1  0  4  1  1  4   3.3290     201
  3  1  1 22 -2  0 -1  1  1  1  4   3.3290     201
  2  1  1  4 -2  1  0  4  2  1 22   3.3290     202
  2  1  1 22 -2  1  0  4  2  1  4   3.3290     202
  3  1  1  4 -2  0 -1  1  2  1 22   3.3290     202
  3  1  1 22 -2  0 -1  1  2  1  4   3.3290     202
  1  2  1  4  2  0  1  3  1  1 22   3.3290     203
  1  2  1 22  2  0  1  3  1  1  4   3.3290     203
  4  2  1  4  2 -1  0  2  1  1 22   3.3290     203
  4  2  1 22  2 -1  0  2  1  1  4   3.3290     203
  1  2  1 22  2  0  1  3  2  1  4   3.3290     204
  2  2  1  4 -2  1  0  4  2  1 22   3.3290     204
  2  2  1 22 -2  1  0  4  2  1  4   3.3290     204
  3  2  1  4 -2  0 -1  1  2  1 22   3.3290     204
  4  2  1  4  2 -1  0  2  2  1 22   3.3290     204
  4  2  1 22  2 -1  0  2  2  1  4   3.3290     204
  2  1  1  5 -1  0  0  2  1  1 28   3.3333     205
  2  1  1 28  1  0  0  2  1  1  5   3.3333     205
  1  1  1  5  1  0  0  1  1  1 28   3.3334     205
  1  1  1 28 -1  0  0  1  1  1  5   3.3334     205
  3  1  1  5 -1  0  0  3  1  1 28   3.3334     205
  3  1  1 28  1  0  0  3  1  1  5   3.3334     205
  1  1  1 28 -1  0  0  1  2  1  5   3.3334     206
  2  1  1 28  1  0  0  2  2  1  5   3.3334     206
  1  2  1  5  1  0  0  1  1  1 28   3.3334     207
  2  2  1  5 -1  0  0  2  1  1 28   3.3334     207
  4  1  1  5  1  0  0  4  1  1 28   3.3334     205
  4  1  1 28 -1  0  0  4  1  1  5   3.3334     205
  3  1  1 28  1  0  0  3  2  1  5   3.3334     206
  3  2  1  5 -1  0  0  3  1  1 28   3.3334     207
  4  1  1 28 -1  0  0  4  2  1  5   3.3334     206
  4  2  1  5  1  0  0  4  1  1 28   3.3334     207
  2  1  1 25 -1  0  0  4  1  1 27   3.3369     205
  4  1  1 27  1  0  0  2  1  1 25   3.3369     205
  1  1  1 27  1 -1  1  3  2  1 25   3.3369     206
  3  2  1 25 -1  1 -1  1  1  1 27   3.3369     207
  1  1  1 25  1 -1  1  3  1  1 27   3.3369     205
  1  1  1 27  1 -1  1  3  1  1 25   3.3369     205
  3  1  1 25 -1  1 -1  1  1  1 27   3.3369     205
  3  1  1 27 -1  1 -1  1  1  1 25   3.3369     205
  3  1  1 27 -1  1 -1  1  2  1 25   3.3369     206
  4  1  1 27  1  0  0  2  2  1 25   3.3369     206
  1  2  1 25  1 -1  1  3  1  1 27   3.3369     207
  2  2  1 25 -1  0  0  4  1  1 27   3.3369     207
  2  1  1 27 -1  0  0  4  1  1 25   3.3369     205
  4  1  1 25  1  0  0  2  1  1 27   3.3369     205
  2  1  1 27 -1  0  0  4  2  1 25   3.3369     206
  4  2  1 25  1  0  0  2  1  1 27   3.3369     207
  1  1  1 22  2  0  1  3  1  1 23   3.3521     209
  1  1  1 23  2  0  1  3  1  1 22   3.3521     209
  3  1  1 22 -2  0 -1  1  1  1 23   3.3521     209
  3  1  1 23 -2  0 -1  1  1  1 22   3.3521     209
  1  1  1 23  2  0  1  3  2  1 22   3.3521     210
  3  1  1 22 -2  0 -1  1  2  1 23   3.3521     210
  3  1  1 23 -2  0 -1  1  2  1 22   3.3521     210
  4  1  1 22  2 -1  0  2  2  1 23   3.3521     210
  1  2  1 22  2  0  1  3  1  1 23   3.3521     211
  1  2  1 23  2  0  1  3  1  1 22   3.3521     211
  2  2  1 23 -2  1  0  4  1  1 22   3.3521     211
  3  2  1 22 -2  0 -1  1  1  1 23   3.3521     211
  1  2  1 23  2  0  1  3  2  1 22   3.3521     212
  3  2  1 22 -2  0 -1  1  2  1 23   3.3521     212
  2  1  1 22 -2  1  0  4  1  1 23   3.3521     209
  2  1  1 23 -2  1  0  4  1  1 22   3.3521     209
  4  1  1 22  2 -1  0  2  1  1 23   3.3521     209
  4  1  1 23  2 -1  0  2  1  1 22   3.3521     209
  1  1  1 22  2  0  1  3  2  1 23   3.3521     210
  4  1  1 23  2 -1  0  2  2  1 22   3.3521     210
  2  2  1 22 -2  1  0  4  1  1 23   3.3521     211
  3  2  1 23 -2  0 -1  1  1  1 22   3.3521     211
  1  2  1 22  2  0  1  3  2  1 23   3.3521     212
  2  2  1 23 -2  1  0  4  2  1 22   3.3521     212
  3  2  1 23 -2  0 -1  1  2  1 22   3.3521     212
  4  2  1 22  2 -1  0  2  2  1 23   3.3521     212
  2  1  1 22 -2  1  0  4  2  1 23   3.3521     210
  2  1  1 23 -2  1  0  4  2  1 22   3.3521     210
  4  2  1 22  2 -1  0  2  1  1 23   3.3521     211
  4  2  1 23  2 -1  0  2  1  1 22   3.3521     211
  2  2  1 22 -2  1  0  4  2  1 23   3.3521     212
  4  2  1 23  2 -1  0  2  2  1 22   3.3521     212
  1  2  1 27  0  0  0  4  2  1  6   3.3533     212
  2  2  1 27  0  0  1  3  2  1  6   3.3533     212
  3  2  1  6  0  0 -1  2  2  1 27   3.3533     212
  4  2  1  6  0  0  0  1  2  1 27   3.3533     212
  3  1  1  6  0  0 -1  2  2  1 27   3.3533     210
  4  1  1  6  0  0  0  1  2  1 27   3.3533     210
  1  2  1 27  0  0  0  4  1  1  6   3.3533     211
  2  2  1 27  0  0  1  3  1  1  6   3.3533     211
  1  1  1  6  0  0  1  4  2  1 27   3.3533     210
  2  1  1  6  0  0  0  3  2  1 27   3.3533     210
  3  2  1 27  0  0  0  2  1  1  6   3.3533     211
  4  2  1 27  0  0 -1  1  1  1  6   3.3533     211
  1  2  1  6  0  0  1  4  2  1 27   3.3533     212
  2  2  1  6  0  0  0  3  2  1 27   3.3533     212
  3  2  1 27  0  0  0  2  2  1  6   3.3533     212
  4  2  1 27  0  0 -1  1  2  1  6   3.3533     212
  1  1  1 15  0  0  0  4  1  1 24   3.3549     209
  4  1  1 24  0  0  0  1  1  1 15   3.3549     209
  1  1  1 15  0  0  0  4  2  1 24   3.3549     210
  4  1  1 24  0  0  0  1  2  1 15   3.3549     210
  1  2  1 15  0  0  0  4  1  1 24   3.3549     211
  4  2  1 24  0  0  0  1  1  1 15   3.3549     211
  1  2  1 15  0  0  0  4  2  1 24   3.3549     212
  4  2  1 24  0  0  0  1  2  1 15   3.3549     212
  2  1  1 15  0  0  1  3  2  1 24   3.3549     210
  3  1  1 15  0  0  0  2  2  1 24   3.3549     210
  2  2  1 24  0  0  0  3  1  1 15   3.3549     211
  3  2  1 24  0  0 -1  2  1  1 15   3.3549     211
  1  1  1 24  0  0  1  4  1  1 15   3.3549     209
  2  1  1 15  0  0  1  3  1  1 24   3.3549     209
  2  1  1 24  0  0  0  3  1  1 15   3.3549     209
  3  1  1 15  0  0  0  2  1  1 24   3.3549     209
  3  1  1 24  0  0 -1  2  1  1 15   3.3549     209
  4  1  1 15  0  0 -1  1  1  1 24   3.3549     209
  4  1  1 15  0  0 -1  1  2  1 24   3.3549     210
  1  2  1 24  0  0  1  4  1  1 15   3.3549     211
  2  2  1 15  0  0  1  3  2  1 24   3.3549     212
  2  2  1 24  0  0  0  3  2  1 15   3.3549     212
  3  2  1 15  0  0  0  2  2  1 24   3.3549     212
  3  2  1 24  0  0 -1  2  2  1 15   3.3549     212
  1  1  1 24  0  0  1  4  2  1 15   3.3549     210
  2  1  1 24  0  0  0  3  2  1 15   3.3549     210
  3  1  1 24  0  0 -1  2  2  1 15   3.3549     210
  2  2  1 15  0  0  1  3  1  1 24   3.3549     211
  3  2  1 15  0  0  0  2  1  1 24   3.3549     211
  4  2  1 15  0  0 -1  1  1  1 24   3.3549     211
  1  2  1 24  0  0  1  4  2  1 15   3.3549     212
  4  2  1 15  0  0 -1  1  2  1 24   3.3549     212
  2  1  1 17  1  0  0  2  1  1 21   3.3640     213
  2  1  1 21 -1  0  0  2  1  1 17   3.3640     213
  2  1  1 21 -1  0  0  2  2  1 17   3.3640     214
  2  2  1 17  1  0  0  2  1  1 21   3.3640     215
  1  1  1 17 -1  0  0  1  1  1 21   3.3640     213
  1  1  1 21  1  0  0  1  1  1 17   3.3640     213
  3  1  1 17  1  0  0  3  1  1 21   3.3640     213
  3  1  1 21 -1  0  0  3  1  1 17   3.3640     213
  1  1  1 21  1  0  0  1  2  1 17   3.3640     214
  1  2  1 17 -1  0  0  1  1  1 21   3.3640     215
  3  1  1 21 -1  0  0  3  2  1 17   3.3640     214
  3  2  1 17  1  0  0  3  1  1 21   3.3640     215
  4  1  1 21  1  0  0  4  2  1 17   3.3641     214
  4  2  1 17 -1  0  0  4  1  1 21   3.3641     215
  4  1  1 17 -1  0  0  4  1  1 21   3.3641     213
  4  1  1 21  1  0  0  4  1  1 17   3.3641     213
  2  1  1 23 -1  0  0  2  1  1 26   3.3641     213
  2  1  1 26  1  0  0  2  1  1 23   3.3641     213
  2  1  1 26  1  0  0  2  2  1 23   3.3641     214
  2  2  1 23 -1  0  0  2  1  1 26   3.3641     215
  1  1  1 23  1  0  0  1  1  1 26   3.3641     213
  1  1  1 26 -1  0  0  1  1  1 23   3.3641     213
  3  1  1 23 -1  0  0  3  1  1 26   3.3641     213
  3  1  1 26  1  0  0  3  1  1 23   3.3641     213
  1  1  1 26 -1  0  0  1  2  1 23   3.3641     214
  1  2  1 23  1  0  0  1  1  1 26   3.3641     215
  3  1  1 26  1  0  0  3  2  1 23   3.3642     214
  3  2  1 23 -1  0  0  3  1  1 26   3.3642     215
  4  1  1 23  1  0  0  4  1  1 26   3.3642     213
  4  1  1 26 -1  0  0  4  1  1 23   3.3642     213
  4  1  1 26 -1  0  0  4  2  1 23   3.3642     214
  4  2  1 23  1  0  0  4  1  1 26   3.3642     215
  2  1  1 23 -1  0  0  2  2  1 20   3.3762     218
  2  2  1 20  1  0  0  2  1  1 23   3.3762     219
  2  2  1 20  1  0  0  2  2  1 23   3.3762     220
  2  2  1 23 -1  0  0  2  2  1 20   3.3762     220
  1  1  1 23  1  0  0  1  2  1 20   3.3762     218
  3  1  1 23 -1  0  0  3  2  1 20   3.3762     218
  1  2  1 20 -1  0  0  1  1  1 23   3.3762     219
  3  2  1 20  1  0  0  3  1  1 23   3.3762     219
  1  2  1 20 -1  0  0  1  2  1 23   3.3762     220
  1  2  1 23  1  0  0  1  2  1 20   3.3762     220
  4  1  1 23  1  0  0  4  2  1 20   3.3762     218
  4  2  1 20 -1  0  0  4  1  1 23   3.3762     219
  4  2  1 20 -1  0  0  4  2  1 23   3.3762     220
  4  2  1 23  1  0  0  4  2  1 20   3.3762     220
  3  2  1 20  1  0  0  3  2  1 23   3.3762     220
  3  2  1 23 -1  0  0  3  2  1 20   3.3762     220
  1  1  1  9  1 -1  0  2  2  1 28   3.4071     222
  2  2  1 28 -1  1  0  1  1  1  9   3.4071     223
  1  2  1  9  1 -1  0  2  2  1 28   3.4071     224
  2  2  1 28 -1  1  0  1  2  1  9   3.4071     224
  2  1  1  9 -1  0  0  1  2  1 28   3.4071     222
  3  1  1  9 -1  1  0  4  2  1 28   3.4071     222
  4  1  1  9  1  0  0  3  2  1 28   3.4071     222
  1  2  1 28  1  0  0  2  1  1  9   3.4071     223
  3  2  1 28 -1  0  0  4  1  1  9   3.4071     223
  4  2  1 28  1 -1  0  3  1  1  9   3.4071     223
  1  2  1 28  1  0  0  2  2  1  9   3.4071     224
  2  2  1  9 -1  0  0  1  2  1 28   3.4071     224
  3  2  1  9 -1  1  0  4  2  1 28   3.4071     224
  4  2  1 28  1 -1  0  3  2  1  9   3.4071     224
  3  2  1 28 -1  0  0  4  2  1  9   3.4072     224
  4  2  1  9  1  0  0  3  2  1 28   3.4072     224
  1  1  1 18  1  0  0  2  1  1 22   3.4121     221
  2  1  1 22 -1  0  0  1  1  1 18   3.4121     221
  2  1  1 22 -1  0  0  1  2  1 18   3.4121     222
  1  2  1 18  1  0  0  2  1  1 22   3.4121     223
  1  1  1 18  1  0  0  2  2  1 22   3.4121     222
  3  1  1 18 -1  0  0  4  2  1 22   3.4121     222
  3  1  1 22 -1  1  0  4  2  1 18   3.4121     222
  2  2  1 22 -1  0  0  1  1  1 18   3.4121     223
  4  2  1 18  1 -1  0  3  1  1 22   3.4121     223
  4  2  1 22  1  0  0  3  1  1 18   3.4121     223
  1  2  1 18  1  0  0  2  2  1 22   3.4121     224
  2  2  1 22 -1  0  0  1  2  1 18   3.4121     224
  3  2  1 18 -1  0  0  4  2  1 22   3.4121     224
  4  2  1 22  1  0  0  3  2  1 18   3.4121     224
  1  1  1 22  1 -1  0  2  1  1 18   3.4121     221
  2  1  1 18 -1  1  0  1  1  1 22   3.4121     221
  3  1  1 22 -1  1  0  4  1  1 18   3.4121     221
  4  1  1 18  1 -1  0  3  1  1 22   3.4121     221
  1  1  1 22  1 -1  0  2  2  1 18   3.4121     222
  2  1  1 18 -1  1  0  1  2  1 22   3.4121     222
  4  1  1 22  1  0  0  3  2  1 18   3.4121     222
  1  2  1 22  1 -1  0  2  1  1 18   3.4121     223
  2  2  1 18 -1  1  0  1  1  1 22   3.4121     223
  3  2  1 18 -1  0  0  4  1  1 22   3.4121     223
  1  2  1 22  1 -1  0  2  2  1 18   3.4121     224
  2  2  1 18 -1  1  0  1  2  1 22   3.4121     224
  3  2  1 22 -1  1  0  4  2  1 18   3.4121     224
  4  2  1 18  1 -1  0  3  2  1 22   3.4121     224
  3  1  1 18 -1  0  0  4  1  1 22   3.4121     221
  4  1  1 22  1  0  0  3  1  1 18   3.4121     221
  4  1  1 18  1 -1  0  3  2  1 22   3.4121     222
  3  2  1 22 -1  1  0  4  1  1 18   3.4121     223
  2  1  1 24 -1  0  0  3  1  1 12   3.4179     225
  3  1  1 12  1  0  0  2  1  1 24   3.4179     225
  2  1  1 12  1  0  1  3  1  1 24   3.4179     225
  3  1  1 24 -1  0 -1  2  1  1 12   3.4179     225
  1  1  1 24  1  0  1  4  2  1 12   3.4179     226
  2  1  1 24 -1  0  0  3  2  1 12   3.4179     226
  3  1  1 12  1  0  0  2  2  1 24   3.4179     226
  3  1  1 24 -1  0 -1  2  2  1 12   3.4179     226
  2  2  1 12  1  0  1  3  1  1 24   3.4179     227
  2  2  1 24 -1  0  0  3  1  1 12   3.4179     227
  3  2  1 12  1  0  0  2  1  1 24   3.4179     227
  4  2  1 12 -1  0 -1  1  1  1 24   3.4179     227
  1  2  1 24  1  0  1  4  2  1 12   3.4179     228
  2  2  1 12  1  0  1  3  2  1 24   3.4179     228
  2  2  1 24 -1  0  0  3  2  1 12   3.4179     228
  3  2  1 12  1  0  0  2  2  1 24   3.4179     228
  3  2  1 24 -1  0 -1  2  2  1 12   3.4179     228
  4  2  1 12 -1  0 -1  1  2  1 24   3.4179     228
  1  1  1 12 -1  0  0  4  1  1 24   3.4179     225
  1  1  1 24  1  0  1  4  1  1 12   3.4179     225
  4  1  1 12 -1  0 -1  1  1  1 24   3.4179     225
  4  1  1 24  1  0  0  1  1  1 12   3.4179     225
  2  1  1 12  1  0  1  3  2  1 24   3.4179     226
  4  1  1 12 -1  0 -1  1  2  1 24   3.4179     226
  4  1  1 24  1  0  0  1  2  1 12   3.4179     226
  1  2  1 12 -1  0  0  4  1  1 24   3.4179     227
  1  2  1 24  1  0  1  4  1  1 12   3.4179     227
  3  2  1 24 -1  0 -1  2  1  1 12   3.4179     227
  1  1  1 12 -1  0  0  4  2  1 24   3.4179     226
  4  2  1 24  1  0  0  1  1  1 12   3.4179     227
  1  2  1 12 -1  0  0  4  2  1 24   3.4179     228
  4  2  1 24  1  0  0  1  2  1 12   3.4179     228
  1  1  1 17 -1  0  0  1  2  1 21   3.4275     230
  2  1  1 17  1  0  0  2  2  1 21   3.4275     230
  1  2  1 21  1  0  0  1  1  1 17   3.4275     231
  2  2  1 21 -1  0  0  2  1  1 17   3.4275     231
  1  2  1 17 -1  0  0  1  2  1 21   3.4275     232
  1  2  1 21  1  0  0  1  2  1 17   3.4275     232
  2  2  1 17  1  0  0  2  2  1 21   3.4275     232
  2  2  1 21 -1  0  0  2  2  1 17   3.4275     232
  4  2  1 17 -1  0  0  4  2  1 21   3.4275     232
  3  1  1 17  1  0  0  3  2  1 21   3.4276     230
  3  2  1 21 -1  0  0  3  1  1 17   3.4276     231
  4  2  1 21  1  0  0  4  2  1 17   3.4276     232
  3  2  1 17  1  0  0  3  2  1 21   3.4276     232
  3  2  1 21 -1  0  0  3  2  1 17   3.4276     232
  4  1  1 17 -1  0  0  4  2  1 21   3.4276     230
  4  2  1 21  1  0  0  4  1  1 17   3.4276     231
  2  1  1  4 -1  0  0  2  1  1 26   3.4277     229
  2  1  1 26  1  0  0  2  1  1  4   3.4277     229
  3  1  1  4 -1  0  0  3  1  1 26   3.4277     229
  3  1  1 26  1  0  0  3  1  1  4   3.4277     229
  2  1  1 26  1  0  0  2  2  1  4   3.4277     230
  2  2  1  4 -1  0  0  2  1  1 26   3.4277     231
  1  1  1  4  1  0  0  1  1  1 26   3.4277     229
  1  1  1 26 -1  0  0  1  1  1  4   3.4277     229
  1  1  1 26 -1  0  0  1  2  1  4   3.4277     230
  1  2  1  4  1  0  0  1  1  1 26   3.4277     231
  3  1  1 26  1  0  0  3  2  1  4   3.4277     230
  3  2  1  4 -1  0  0  3  1  1 26   3.4277     231
  4  1  1  4  1  0  0  4  1  1 26   3.4277     229
  4  1  1 26 -1  0  0  4  1  1  4   3.4277     229
  4  1  1 26 -1  0  0  4  2  1  4   3.4277     230
  4  2  1  4  1  0  0  4  1  1 26   3.4277     231
  2  1  1 27  0  0  0  3  1  1 13   3.4286     229
  3  1  1 13  0  0  0  2  1  1 27   3.4286     229
  1  1  1 27  0  0  1  4  1  1 13   3.4286     229
  4  1  1 13  0  0 -1  1  1  1 27   3.4286     229
  2  1  1 27  0  0  0  3  2  1 13   3.4286     230
  3  2  1 13  0  0  0  2  1  1 27   3.4286     231
  1  1  1 13  0  0  0  4  1  1 27   3.4286     229
  2  1  1 13  0  0  1  3  1  1 27   3.4286     229
  3  1  1 27  0  0 -1  2  1  1 13   3.4286     229
  4  1  1 27  0  0  0  1  1  1 13   3.4286     229
  1  1  1 27  0  0  1  4  2  1 13   3.4286     230
  3  1  1 27  0  0 -1  2  2  1 13   3.4286     230
  4  1  1 27  0  0  0  1  2  1 13   3.4286     230
  1  2  1 13  0  0  0  4  1  1 27   3.4286     231
  2  2  1 13  0  0  1  3  1  1 27   3.4286     231
  4  2  1 13  0  0 -1  1  1  1 27   3.4286     231
  1  1  1 20  1 -1  0  2  2  1 27   3.4378     234
  2  1  1 20 -1  0  0  1  2  1 27   3.4378     234
  4  1  1 20  1  0  0  3  2  1 27   3.4378     234
  1  2  1 27  1  0  0  2  1  1 20   3.4378     235
  2  2  1 27 -1  1  0  1  1  1 20   3.4378     235
  3  2  1 27 -1  0  0  4  1  1 20   3.4378     235
  3  1  1 20 -1  1  0  4  2  1 27   3.4378     234
  4  2  1 27  1 -1  0  3  1  1 20   3.4378     235
  2  1  1 20  1  0  0  2  1  1 23   3.4386     233
  2  1  1 23 -1  0  0  2  1  1 20   3.4386     233
  1  1  1 20 -1  0  0  1  1  1 23   3.4387     233
  1  1  1 23  1  0  0  1  1  1 20   3.4387     233
  3  1  1 20  1  0  0  3  1  1 23   3.4387     233
  3  1  1 23 -1  0  0  3  1  1 20   3.4387     233
  1  1  1 20 -1  0  0  1  2  1 23   3.4387     234
  2  1  1 20  1  0  0  2  2  1 23   3.4387     234
  1  2  1 23  1  0  0  1  1  1 20   3.4387     235
  2  2  1 23 -1  0  0  2  1  1 20   3.4387     235
  3  1  1 20  1  0  0  3  2  1 23   3.4387     234
  3  2  1 23 -1  0  0  3  1  1 20   3.4387     235
  4  1  1 20 -1  0  0  4  2  1 23   3.4387     234
  4  2  1 23  1  0  0  4  1  1 20   3.4387     235
  4  1  1 20 -1  0  0  4  1  1 23   3.4387     233
  4  1  1 23  1  0  0  4  1  1 20   3.4387     233
  1  1  1 14  0  0  0  4  2  1 24   3.4438     238
  4  2  1 24  0  0  0  1  1  1 14   3.4438     239
  1  2  1 14  0  0  0  4  2  1 24   3.4438     240
  4  2  1 24  0  0  0  1  2  1 14   3.4438     240
  1  1  1 14  0  0  0  4  1  1 24   3.4438     237
  4  1  1 24  0  0  0  1  1  1 14   3.4438     237
  2  1  1 14  0  0  1  3  2  1 24   3.4438     238
  4  1  1 24  0  0  0  1  2  1 14   3.4438     238
  1  2  1 14  0  0  0  4  1  1 24   3.4438     239
  3  2  1 24  0  0 -1  2  1  1 14   3.4438     239
  1  1  1 24  0  0  1  4  1  1 14   3.4438     237
  2  1  1 14  0  0  1  3  1  1 24   3.4438     237
  2  1  1 24  0  0  0  3  1  1 14   3.4438     237
  3  1  1 14  0  0  0  2  1  1 24   3.4438     237
  3  1  1 24  0  0 -1  2  1  1 14   3.4438     237
  4  1  1 14  0  0 -1  1  1  1 24   3.4438     237
  3  1  1 14  0  0  0  2  2  1 24   3.4438     238
  4  1  1 14  0  0 -1  1  2  1 24   3.4438     238
  1  2  1 24  0  0  1  4  1  1 14   3.4438     239
  2  2  1 24  0  0  0  3  1  1 14   3.4438     239
  1  2  1 24  0  0  1  4  2  1 14   3.4438     240
  2  2  1 14  0  0  1  3  2  1 24   3.4438     240
  3  2  1 24  0  0 -1  2  2  1 14   3.4438     240
  4  2  1 14  0  0 -1  1  2  1 24   3.4438     240
  1  1  1 24  0  0  1  4  2  1 14   3.4438     238
  2  1  1 24  0  0  0  3  2  1 14   3.4438     238
  3  1  1 24  0  0 -1  2  2  1 14   3.4438     238
  2  2  1 14  0  0  1  3  1  1 24   3.4438     239
  3  2  1 14  0  0  0  2  1  1 24   3.4438     239
  4  2  1 14  0  0 -1  1  1  1 24   3.4438     239
  2  2  1 24  0  0  0  3  2  1 14   3.4438     240
  3  2  1 14  0  0  0  2  2  1 24   3.4438     240
  3  1  1 18  0  0  0  4  2  1 20   3.4466     238
  4  2  1 20  0  0  0  3  1  1 18   3.4466     239
  3  2  1 18  0  0  0  4  2  1 20   3.4466     240
  4  2  1 20  0  0  0  3  2  1 18   3.4466     240
  1  1  1 18  0  0  0  2  2  1 20   3.4466     238
  2  1  1 18  0  1  0  1  2  1 20   3.4466     238
  1  2  1 20  0 -1  0  2  1  1 18   3.4466     239
  2  2  1 20  0  0  0  1  1  1 18   3.4466     239
  1  2  1 18  0  0  0  2  2  1 20   3.4466     240
  1  2  1 20  0 -1  0  2  2  1 18   3.4466     240
  2  2  1 18  0  1  0  1  2  1 20   3.4466     240
  2  2  1 20  0  0  0  1  2  1 18   3.4466     240
  3  2  1 20  0  1  0  4  2  1 18   3.4466     240
  4  2  1 18  0 -1  0  3  2  1 20   3.4466     240
  4  1  1 18  0 -1  0  3  2  1 20   3.4466     238
  3  2  1 20  0  1  0  4  1  1 18   3.4466     239
  1  1  1 25  1 -1  1  3  1  1 25   3.4470     237
  3  1  1 25 -1  1 -1  1  1  1 25   3.4470     237
  1  1  1 25  1 -1  1  3  2  1 25   3.4470     238
  3  1  1 25 -1  1 -1  1  2  1 25   3.4470     238
  1  2  1 25  1 -1  1  3  1  1 25   3.4470     239
  3  2  1 25 -1  1 -1  1  1  1 25   3.4470     239
  1  2  1 25  1 -1  1  3  2  1 25   3.4470     240
  3  2  1 25 -1  1 -1  1  2  1 25   3.4470     240
  2  1  1 25 -1  0  0  4  1  1 25   3.4471     237
  4  1  1 25  1  0  0  2  1  1 25   3.4471     237
  2  1  1 25 -1  0  0  4  2  1 25   3.4471     238
  4  1  1 25  1  0  0  2  2  1 25   3.4471     238
  2  2  1 25 -1  0  0  4  1  1 25   3.4471     239
  4  2  1 25  1  0  0  2  1  1 25   3.4471     239
  2  2  1 25 -1  0  0  4  2  1 25   3.4471     240
  4  2  1 25  1  0  0  2  2  1 25   3.4471     240
  1  1  1 28  0  0  1  4  1  1 18   3.4478     237
  2  1  1 28  0  0  0  3  1  1 18   3.4478     237
  3  1  1 18  0  0  0  2  1  1 28   3.4478     237
  4  1  1 18  0  0 -1  1  1  1 28   3.4478     237
  1  1  1 18  0  0  0  4  1  1 28   3.4478     237
  2  1  1 18  0  0  1  3  1  1 28   3.4478     237
  3  1  1 28  0  0 -1  2  1  1 18   3.4478     237
  4  1  1 28  0  0  0  1  1  1 18   3.4478     237
  1  1  1 28  0  0  1  4  2  1 18   3.4478     238
  2  1  1 28  0  0  0  3  2  1 18   3.4478     238
  3  1  1 28  0  0 -1  2  2  1 18   3.4478     238
  4  1  1 28  0  0  0  1  2  1 18   3.4478     238
  1  2  1 18  0  0  0  4  1  1 28   3.4478     239
  2  2  1 18  0  0  1  3  1  1 28   3.4478     239
  3  2  1 18  0  0  0  2  1  1 28   3.4478     239
  4  2  1 18  0  0 -1  1  1  1 28   3.4478     239
  4  2  1 11 -1  0  0  4  2  1 27   3.4520     244
  4  2  1 27  1  0  0  4  2  1 11   3.4520     244
  1  1  1 11 -1  0  0  1  2  1 27   3.4520     242
  2  1  1 11  1  0  0  2  2  1 27   3.4520     242
  3  1  1 11  1  0  0  3  2  1 27   3.4520     242
  1  2  1 27  1  0  0  1  1  1 11   3.4520     243
  2  2  1 27 -1  0  0  2  1  1 11   3.4520     243
  3  2  1 27 -1  0  0  3  1  1 11   3.4520     243
  1  2  1 11 -1  0  0  1  2  1 27   3.4520     244
  1  2  1 27  1  0  0  1  2  1 11   3.4520     244
  2  2  1 11  1  0  0  2  2  1 27   3.4520     244
  2  2  1 27 -1  0  0  2  2  1 11   3.4520     244
  4  1  1 11 -1  0  0  4  2  1 27   3.4520     242
  4  2  1 27  1  0  0  4  1  1 11   3.4520     243
  3  2  1 11  1  0  0  3  2  1 27   3.4520     244
  3  2  1 27 -1  0  0  3  2  1 11   3.4520     244
  2  2  1 26 -1  1  0  4  2  1 25   3.4558     244
  4  2  1 25  1 -1  0  2  2  1 26   3.4558     244
  1  1  1 25  1  0  1  3  2  1 26   3.4558     242
  2  1  1 25 -1  1  0  4  2  1 26   3.4558     242
  3  1  1 25 -1  0 -1  1  2  1 26   3.4558     242
  4  1  1 25  1 -1  0  2  2  1 26   3.4558     242
  1  2  1 26  1  0  1  3  1  1 25   3.4558     243
  2  2  1 26 -1  1  0  4  1  1 25   3.4558     243
  3  2  1 26 -1  0 -1  1  1  1 25   3.4558     243
  4  2  1 26  1 -1  0  2  1  1 25   3.4558     243
  1  2  1 25  1  0  1  3  2  1 26   3.4558     244
  2  2  1 25 -1  1  0  4  2  1 26   3.4558     244
  3  2  1 26 -1  0 -1  1  2  1 25   3.4558     244
  4  2  1 26  1 -1  0  2  2  1 25   3.4558     244
  1  2  1 26  1  0  1  3  2  1 25   3.4558     244
  3  2  1 25 -1  0 -1  1  2  1 26   3.4558     244
  1  1  1 19  1  0  0  2  1  1 15   3.4633     245
  2  1  1 15 -1  0  0  1  1  1 19   3.4633     245
  4  1  1 15  1  0  0  3  2  1 19   3.4633     246
  3  2  1 19 -1  0  0  4  1  1 15   3.4633     247
  3  2  1 19 -1  0  0  4  2  1 15   3.4633     248
  4  2  1 15  1  0  0  3  2  1 19   3.4633     248
  1  1  1 15  1 -1  0  2  1  1 19   3.4633     245
  2  1  1 19 -1  1  0  1  1  1 15   3.4633     245
  3  1  1 15 -1  1  0  4  1  1 19   3.4633     245
  3  1  1 19 -1  0  0  4  1  1 15   3.4633     245
  4  1  1 15  1  0  0  3  1  1 19   3.4633     245
  4  1  1 19  1 -1  0  3  1  1 15   3.4633     245
  1  1  1 15  1 -1  0  2  2  1 19   3.4633     246
  1  1  1 19  1  0  0  2  2  1 15   3.4633     246
  2  1  1 15 -1  0  0  1  2  1 19   3.4633     246
  2  1  1 19 -1  1  0  1  2  1 15   3.4633     246
  3  1  1 15 -1  1  0  4  2  1 19   3.4633     246
  3  1  1 19 -1  0  0  4  2  1 15   3.4633     246
  4  1  1 19  1 -1  0  3  2  1 15   3.4633     246
  1  2  1 15  1 -1  0  2  1  1 19   3.4633     247
  1  2  1 19  1  0  0  2  1  1 15   3.4633     247
  2  2  1 15 -1  0  0  1  1  1 19   3.4633     247
  2  2  1 19 -1  1  0  1  1  1 15   3.4633     247
  3  2  1 15 -1  1  0  4  1  1 19   3.4633     247
  4  2  1 15  1  0  0  3  1  1 19   3.4633     247
  4  2  1 19  1 -1  0  3  1  1 15   3.4633     247
  1  2  1 15  1 -1  0  2  2  1 19   3.4633     248
  1  2  1 19  1  0  0  2  2  1 15   3.4633     248
  2  2  1 15 -1  0  0  1  2  1 19   3.4633     248
  2  2  1 19 -1  1  0  1  2  1 15   3.4633     248
  3  2  1 15 -1  1  0  4  2  1 19   3.4633     248
  4  2  1 19  1 -1  0  3  2  1 15   3.4633     248
  4  1  1  6  1 -1  0  2  2  1 14   3.4675     246
  2  2  1 14 -1  1  0  4  1  1  6   3.4675     247
  2  2  1 14 -1  1  0  4  2  1  6   3.4675     248
  4  2  1  6  1 -1  0  2  2  1 14   3.4675     248
  2  1  1 14 -1  1  0  4  1  1  6   3.4675     245
  4  1  1  6  1 -1  0  2  1  1 14   3.4675     245
  2  1  1 14 -1  1  0  4  2  1  6   3.4675     246
  4  1  1 14  1 -1  0  2  2  1  6   3.4675     246
  2  2  1  6 -1  1  0  4  1  1 14   3.4675     247
  4  2  1  6  1 -1  0  2  1  1 14   3.4675     247
  1  2  1 14  1  0  1  3  2  1  6   3.4675     248
  2  2  1  6 -1  1  0  4  2  1 14   3.4675     248
  4  2  1 14  1 -1  0  2  2  1  6   3.4675     248
  1  1  1 14  1  0  1  3  1  1  6   3.4675     245
  3  1  1  6 -1  0 -1  1  1  1 14   3.4675     245
  1  1  1  6  1  0  1  3  2  1 14   3.4675     246
  1  1  1 14  1  0  1  3  2  1  6   3.4675     246
  2  1  1  6 -1  1  0  4  2  1 14   3.4675     246
  3  1  1  6 -1  0 -1  1  2  1 14   3.4675     246
  1  2  1 14  1  0  1  3  1  1  6   3.4675     247
  3  2  1  6 -1  0 -1  1  1  1 14   3.4675     247
  3  2  1 14 -1  0 -1  1  1  1  6   3.4675     247
  4  2  1 14  1 -1  0  2  1  1  6   3.4675     247
  1  2  1  6  1  0  1  3  2  1 14   3.4675     248
  3  2  1  6 -1  0 -1  1  2  1 14   3.4675     248
  3  2  1 14 -1  0 -1  1  2  1  6   3.4675     248
  1  1  1  6  1  0  1  3  1  1 14   3.4675     245
  2  1  1  6 -1  1  0  4  1  1 14   3.4675     245
  3  1  1 14 -1  0 -1  1  1  1  6   3.4675     245
  4  1  1 14  1 -1  0  2  1  1  6   3.4675     245
  3  1  1 14 -1  0 -1  1  2  1  6   3.4675     246
  1  2  1  6  1  0  1  3  1  1 14   3.4675     247
  4  1  1 12  1  0  0  3  2  1 28   3.4675     246
  3  2  1 28 -1  0  0  4  1  1 12   3.4675     247
  1  1  1 12  1 -1  0  2  2  1 28   3.4675     246
  2  1  1 12 -1  0  0  1  2  1 28   3.4675     246
  3  1  1 12 -1  1  0  4  2  1 28   3.4675     246
  1  2  1 28  1  0  0  2  1  1 12   3.4675     247
  2  2  1 28 -1  1  0  1  1  1 12   3.4675     247
  4  2  1 28  1 -1  0  3  1  1 12   3.4675     247
  1  2  1 12  1 -1  0  2  2  1 28   3.4675     248
  1  2  1 28  1  0  0  2  2  1 12   3.4675     248
  2  2  1 12 -1  0  0  1  2  1 28   3.4675     248
  2  2  1 28 -1  1  0  1  2  1 12   3.4675     248
  3  2  1 12 -1  1  0  4  2  1 28   3.4675     248
  3  2  1 28 -1  0  0  4  2  1 12   3.4675     248
  4  2  1 12  1  0  0  3  2  1 28   3.4675     248
  4  2  1 28  1 -1  0  3  2  1 12   3.4675     248
  1  1  1  8  1  0  1  3  2  1 26   3.4713     250
  2  1  1  8 -1  1  0  4  2  1 26   3.4713     250
  2  2  1 26 -1  1  0  4  1  1  8   3.4713     251
  3  2  1 26 -1  0 -1  1  1  1  8   3.4713     251
  4  2  1 26  1 -1  0  2  1  1  8   3.4713     251
  1  2  1  8  1  0  1  3  2  1 26   3.4713     252
  2  2  1  8 -1  1  0  4  2  1 26   3.4713     252
  2  2  1 26 -1  1  0  4  2  1  8   3.4713     252
  3  2  1 26 -1  0 -1  1  2  1  8   3.4713     252
  4  2  1  8  1 -1  0  2  2  1 26   3.4713     252
  4  2  1 26  1 -1  0  2  2  1  8   3.4713     252
  3  1  1  8 -1  0 -1  1  2  1 26   3.4713     250
  4  1  1  8  1 -1  0  2  2  1 26   3.4713     250
  1  2  1 26  1  0  1  3  1  1  8   3.4713     251
  1  2  1 26  1  0  1  3  2  1  8   3.4713     252
  3  2  1  8 -1  0 -1  1  2  1 26   3.4713     252
  1  2  1 20  1 -1  0  2  2  1 27   3.4761     252
  2  2  1 27 -1  1  0  1  2  1 20   3.4761     252
  3  2  1 20 -1  1  0  4  2  1 27   3.4761     252
  4  2  1 27  1 -1  0  3  2  1 20   3.4761     252
  1  2  1 27  1  0  0  2  2  1 20   3.4761     252
  2  2  1 20 -1  0  0  1  2  1 27   3.4761     252
  3  2  1 27 -1  0  0  4  2  1 20   3.4761     252
  4  2  1 20  1  0  0  3  2  1 27   3.4761     252
  1  1  1 16  0 -1  0  2  1  1 17   3.4811     253
  2  1  1 17  0  1  0  1  1  1 16   3.4811     253
  2  1  1 17  0  1  0  1  2  1 16   3.4811     254
  1  2  1 16  0 -1  0  2  1  1 17   3.4811     255
  3  2  1 16  0  1  0  4  2  1 17   3.4811     256
  4  2  1 17  0 -1  0  3  2  1 16   3.4811     256
  1  1  1 17  0  0  0  2  1  1 16   3.4811     253
  2  1  1 16  0  0  0  1  1  1 17   3.4811     253
  3  1  1 17  0  0  0  4  1  1 16   3.4811     253
  4  1  1 16  0  0  0  3  1  1 17   3.4811     253
  1  1  1 16  0 -1  0  2  2  1 17   3.4811     254
  1  1  1 17  0  0  0  2  2  1 16   3.4811     254
  2  1  1 16  0  0  0  1  2  1 17   3.4811     254
  3  1  1 16  0  1  0  4  2  1 17   3.4811     254
  4  1  1 16  0  0  0  3  2  1 17   3.4811     254
  1  2  1 17  0  0  0  2  1  1 16   3.4811     255
  2  2  1 16  0  0  0  1  1  1 17   3.4811     255
  2  2  1 17  0  1  0  1  1  1 16   3.4811     255
  3  2  1 17  0  0  0  4  1  1 16   3.4811     255
  4  2  1 17  0 -1  0  3  1  1 16   3.4811     255
  1  2  1 16  0 -1  0  2  2  1 17   3.4811     256
  1  2  1 17  0  0  0  2  2  1 16   3.4811     256
  2  2  1 16  0  0  0  1  2  1 17   3.4811     256
  2  2  1 17  0  1  0  1  2  1 16   3.4811     256
  3  1  1 16  0  1  0  4  1  1 17   3.4811     253
  4  1  1 17  0 -1  0  3  1  1 16   3.4811     253
  3  1  1 17  0  0  0  4  2  1 16   3.4811     254
  4  1  1 17  0 -1  0  3  2  1 16   3.4811     254
  3  2  1 16  0  1  0  4  1  1 17   3.4811     255
  4  2  1 16  0  0  0  3  1  1 17   3.4811     255
  3  2  1 17  0  0  0  4  2  1 16   3.4811     256
  4  2  1 16  0  0  0  3  2  1 17   3.4811     256
  2  1  1 10 -1  1  0  4  1  1  4   3.4865     257
  4  1  1  4  1 -1  0  2  1  1 10   3.4865     257
  4  1  1  4  1 -1  0  2  2  1 10   3.4865     258
  2  2  1 10 -1  1  0  4  1  1  4   3.4865     259
  2  2  1 10 -1  1  0  4  2  1  4   3.4865     260
  4  2  1  4  1 -1  0  2  2  1 10   3.4865     260
  1  1  1 10  1  0  1  3  2  1  4   3.4865     258
  2  1  1 10 -1  1  0  4  2  1  4   3.4865     258
  3  2  1  4 -1  0 -1  1  1  1 10   3.4865     259
  4  2  1  4  1 -1  0  2  1  1 10   3.4865     259
  1  2  1 10  1  0  1  3  2  1  4   3.4865     260
  2  2  1  4 -1  1  0  4  2  1 10   3.4865     260
  3  2  1  4 -1  0 -1  1  2  1 10   3.4865     260
  4  2  1 10  1 -1  0  2  2  1  4   3.4865     260
  1  1  1  4  1  0  1  3  1  1 10   3.4865     257
  1  1  1 10  1  0  1  3  1  1  4   3.4865     257
  3  1  1  4 -1  0 -1  1  1  1 10   3.4865     257
  3  1  1 10 -1  0 -1  1  1  1  4   3.4865     257
  1  1  1  4  1  0  1  3  2  1 10   3.4865     258
  2  1  1  4 -1  1  0  4  2  1 10   3.4865     258
  3  1  1  4 -1  0 -1  1  2  1 10   3.4865     258
  3  1  1 10 -1  0 -1  1  2  1  4   3.4865     258
  4  1  1 10  1 -1  0  2  2  1  4   3.4865     258
  1  2  1  4  1  0  1  3  1  1 10   3.4865     259
  1  2  1 10  1  0  1  3  1  1  4   3.4865     259
  2  2  1  4 -1  1  0  4  1  1 10   3.4865     259
  3  2  1 10 -1  0 -1  1  1  1  4   3.4865     259
  4  2  1 10  1 -1  0  2  1  1  4   3.4865     259
  1  2  1  4  1  0  1  3  2  1 10   3.4865     260
  3  2  1 10 -1  0 -1  1  2  1  4   3.4865     260
  2  1  1  4 -1  1  0  4  1  1 10   3.4865     257
  4  1  1 10  1 -1  0  2  1  1  4   3.4865     257
  1  1  1  8  1  0  1  3  2  1 28   3.4891     258
  3  2  1 28 -1  0 -1  1  1  1  8   3.4891     259
  1  2  1  8  1  0  1  3  2  1 28   3.4891     260
  2  2  1  8 -1  1  0  4  2  1 28   3.4891     260
  2  2  1 28 -1  1  0  4  2  1  8   3.4891     260
  3  2  1 28 -1  0 -1  1  2  1  8   3.4891     260
  4  2  1  8  1 -1  0  2  2  1 28   3.4891     260
  4  2  1 28  1 -1  0  2  2  1  8   3.4891     260
  2  1  1  8 -1  1  0  4  2  1 28   3.4891     258
  4  1  1  8  1 -1  0  2  2  1 28   3.4891     258
  2  2  1 28 -1  1  0  4  1  1  8   3.4891     259
  4  2  1 28  1 -1  0  2  1  1  8   3.4891     259
  1  2  1 28  1  0  1  3  2  1  8   3.4891     260
  3  2  1  8 -1  0 -1  1  2  1 28   3.4891     260
  3  1  1  8 -1  0 -1  1  2  1 28   3.4892     258
  1  2  1 28  1  0  1  3  1  1  8   3.4892     259
  2  1  1 12 -1  1  0  4  1  1 23   3.4917     261
  4  1  1 23  1 -1  0  2  1  1 12   3.4917     261
  4  1  1 23  1 -1  0  2  2  1 12   3.4917     262
  2  2  1 12 -1  1  0  4  1  1 23   3.4917     263
  2  1  1 12 -1  1  0  4  2  1 23   3.4917     262
  4  2  1 23  1 -1  0  2  1  1 12   3.4917     263
  2  2  1 12 -1  1  0  4  2  1 23   3.4917     264
  4  2  1 23  1 -1  0  2  2  1 12   3.4917     264
  1  1  1 12  1  0  1  3  2  1 23   3.4917     262
  3  2  1 23 -1  0 -1  1  1  1 12   3.4917     263
  1  2  1 12  1  0  1  3  2  1 23   3.4917     264
  2  2  1 23 -1  1  0  4  2  1 12   3.4917     264
  3  2  1 23 -1  0 -1  1  2  1 12   3.4917     264
  4  2  1 12  1 -1  0  2  2  1 23   3.4917     264
  1  1  1 12  1  0  1  3  1  1 23   3.4917     261
  3  1  1 23 -1  0 -1  1  1  1 12   3.4917     261
  3  1  1 23 -1  0 -1  1  2  1 12   3.4917     262
  1  2  1 12  1  0  1  3  1  1 23   3.4917     263
  1  1  1 23  1  0  1  3  1  1 12   3.4917     261
  3  1  1 12 -1  0 -1  1  1  1 23   3.4917     261
  1  1  1 23  1  0  1  3  2  1 12   3.4917     262
  2  1  1 23 -1  1  0  4  2  1 12   3.4917     262
  3  1  1 12 -1  0 -1  1  2  1 23   3.4917     262
  4  1  1 12  1 -1  0  2  2  1 23   3.4917     262
  1  2  1 23  1  0  1  3  1  1 12   3.4917     263
  2  2  1 23 -1  1  0  4  1  1 12   3.4917     263
  3  2  1 12 -1  0 -1  1  1  1 23   3.4917     263
  4  2  1 12  1 -1  0  2  1  1 23   3.4917     263
  1  2  1 23  1  0  1  3  2  1 12   3.4917     264
  3  2  1 12 -1  0 -1  1  2  1 23   3.4917     264
  2  1  1 23 -1  1  0  4  1  1 12   3.4917     261
  4  1  1 12  1 -1  0  2  1  1 23   3.4917     261
  2  1  1  8 -1  1  0  4  1  1  2   3.4951     261
  4  1  1  2  1 -1  0  2  1  1  8   3.4951     261
  4  1  1  2  1 -1  0  2  2  1  8   3.4951     262
  4  1  1  8  1 -1  0  2  2  1  2   3.4951     262
  2  2  1  2 -1  1  0  4  1  1  8   3.4951     263
  2  2  1  8 -1  1  0  4  1  1  2   3.4951     263
  2  2  1  2 -1  1  0  4  2  1  8   3.4951     264
  2  2  1  8 -1  1  0  4  2  1  2   3.4951     264
  4  2  1  2  1 -1  0  2  2  1  8   3.4951     264
  4  2  1  8  1 -1  0  2  2  1  2   3.4951     264
  2  1  1  2 -1  1  0  4  1  1  8   3.4951     261
  3  1  1  8 -1  0 -1  1  1  1  2   3.4951     261
  4  1  1  8  1 -1  0  2  1  1  2   3.4951     261
  1  1  1  2  1  0  1  3  2  1  8   3.4951     262
  1  1  1  8  1  0  1  3  2  1  2   3.4951     262
  2  1  1  2 -1  1  0  4  2  1  8   3.4951     262
  2  1  1  8 -1  1  0  4  2  1  2   3.4951     262
  3  1  1  8 -1  0 -1  1  2  1  2   3.4951     262
  1  2  1  2  1  0  1  3  1  1  8   3.4951     263
  3  2  1  2 -1  0 -1  1  1  1  8   3.4951     263
  3  2  1  8 -1  0 -1  1  1  1  2   3.4951     263
  4  2  1  2  1 -1  0  2  1  1  8   3.4951     263
  4  2  1  8  1 -1  0  2  1  1  2   3.4951     263
  1  2  1  2  1  0  1  3  2  1  8   3.4951     264
  1  2  1  8  1  0  1  3  2  1  2   3.4951     264
  3  2  1  2 -1  0 -1  1  2  1  8   3.4951     264
  3  2  1  8 -1  0 -1  1  2  1  2   3.4951     264
  1  1  1  2  1  0  1  3  1  1  8   3.4952     261
  1  1  1  8  1  0  1  3  1  1  2   3.4952     261
  3  1  1  2 -1  0 -1  1  1  1  8   3.4952     261
  3  1  1  2 -1  0 -1  1  2  1  8   3.4952     262
  1  2  1  8  1  0  1  3  1  1  2   3.4952     263
  3  1  1 18  0  0  0  4  1  1 20   3.4960     261
  4  1  1 20  0  0  0  3  1  1 18   3.4960     261
  1  1  1 18  0  0  0  2  1  1 20   3.4960     261
  1  1  1 20  0 -1  0  2  1  1 18   3.4960     261
  2  1  1 18  0  1  0  1  1  1 20   3.4960     261
  2  1  1 20  0  0  0  1  1  1 18   3.4960     261
  1  1  1 20  0 -1  0  2  2  1 18   3.4960     262
  2  1  1 20  0  0  0  1  2  1 18   3.4960     262
  3  1  1 20  0  1  0  4  2  1 18   3.4960     262
  4  1  1 20  0  0  0  3  2  1 18   3.4960     262
  1  2  1 18  0  0  0  2  1  1 20   3.4960     263
  2  2  1 18  0  1  0  1  1  1 20   3.4960     263
  3  2  1 18  0  0  0  4  1  1 20   3.4960     263
  4  2  1 18  0 -1  0  3  1  1 20   3.4960     263
  3  1  1 20  0  1  0  4  1  1 18   3.4960     261
  4  1  1 18  0 -1  0  3  1  1 20   3.4960     261
  3  1  1 19 -1  0  0  4  1  1 20   3.4983     265
  4  1  1 20  1  0  0  3  1  1 19   3.4983     265
  1  1  1 20  1 -1  0  2  1  1 19   3.4984     265
  2  1  1 19 -1  1  0  1  1  1 20   3.4984     265
  3  1  1 20 -1  1  0  4  1  1 19   3.4984     265
  4  1  1 19  1 -1  0  3  1  1 20   3.4984     265
  1  1  1 20  1 -1  0  2  2  1 19   3.4984     266
  3  1  1 20 -1  1  0  4  2  1 19   3.4984     266
  4  1  1 20  1  0  0  3  2  1 19   3.4984     266
  2  2  1 19 -1  1  0  1  1  1 20   3.4984     267
  3  2  1 19 -1  0  0  4  1  1 20   3.4984     267
  4  2  1 19  1 -1  0  3  1  1 20   3.4984     267
  1  1  1 19  1  0  0  2  1  1 20   3.4984     265
  2  1  1 20 -1  0  0  1  1  1 19   3.4984     265
  2  1  1 20 -1  0  0  1  2  1 19   3.4984     266
  1  2  1 19  1  0  0  2  1  1 20   3.4984     267
  1  1  1 26  1  0  1  3  2  1 26   3.5003     266
  2  1  1 26 -1  1  0  4  2  1 26   3.5003     266
  3  2  1 26 -1  0 -1  1  1  1 26   3.5003     267
  4  2  1 26  1 -1  0  2  1  1 26   3.5003     267
  3  1  1 26 -1  0 -1  1  2  1 26   3.5003     266
  1  2  1 26  1  0  1  3  1  1 26   3.5003     267
  4  1  1 26  1 -1  0  2  2  1 26   3.5003     266
  2  2  1 26 -1  1  0  4  1  1 26   3.5003     267
  1  1  1 25  0  0  1  4  1  1 12   3.5027     265
  4  1  1 12  0  0 -1  1  1  1 25   3.5027     265
  1  1  1 12  0  0  0  4  2  1 25   3.5027     266
  4  1  1 12  0  0 -1  1  2  1 25   3.5027     266
  1  2  1 25  0  0  1  4  1  1 12   3.5027     267
  4  2  1 25  0  0  0  1  1  1 12   3.5027     267
  1  2  1 12  0  0  0  4  2  1 25   3.5027     268
  4  2  1 25  0  0  0  1  2  1 12   3.5027     268
  1  1  1 12  0  0  0  4  1  1 25   3.5027     265
  2  1  1 25  0  0  0  3  1  1 12   3.5027     265
  3  1  1 12  0  0  0  2  1  1 25   3.5027     265
  4  1  1 25  0  0  0  1  1  1 12   3.5027     265
  2  1  1 25  0  0  0  3  2  1 12   3.5027     266
  3  1  1 12  0  0  0  2  2  1 25   3.5027     266
  4  1  1 25  0  0  0  1  2  1 12   3.5027     266
  1  2  1 12  0  0  0  4  1  1 25   3.5027     267
  2  2  1 25  0  0  0  3  1  1 12   3.5027     267
  3  2  1 12  0  0  0  2  1  1 25   3.5027     267
  2  2  1 25  0  0  0  3  2  1 12   3.5027     268
  3  2  1 12  0  0  0  2  2  1 25   3.5027     268
  2  1  1 12  0  0  1  3  1  1 25   3.5027     265
  3  1  1 25  0  0 -1  2  1  1 12   3.5027     265
  1  1  1 25  0  0  1  4  2  1 12   3.5027     266
  2  1  1 12  0  0  1  3  2  1 25   3.5027     266
  3  1  1 25  0  0 -1  2  2  1 12   3.5027     266
  2  2  1 12  0  0  1  3  1  1 25   3.5027     267
  3  2  1 25  0  0 -1  2  1  1 12   3.5027     267
  4  2  1 12  0  0 -1  1  1  1 25   3.5027     267
  1  2  1 25  0  0  1  4  2  1 12   3.5027     268
  2  2  1 12  0  0  1  3  2  1 25   3.5027     268
  3  2  1 25  0  0 -1  2  2  1 12   3.5027     268
  4  2  1 12  0  0 -1  1  2  1 25   3.5027     268
  3  1  1 21 -1  0  0  4  1  1 16   3.5051     269
  4  1  1 16  1  0  0  3  1  1 21   3.5051     269
  1  1  1 16  1 -1  0  2  1  1 21   3.5051     269
  2  1  1 21 -1  1  0  1  1  1 16   3.5051     269
  2  1  1 21 -1  1  0  1  2  1 16   3.5051     270
  4  1  1 21  1 -1  0  3  2  1 16   3.5051     270
  1  2  1 16  1 -1  0  2  1  1 21   3.5051     271
  3  2  1 16 -1  1  0  4  1  1 21   3.5051     271
  1  1  1 21  1  0  0  2  1  1 16   3.5052     269
  2  1  1 16 -1  0  0  1  1  1 21   3.5052     269
  3  1  1 16 -1  1  0  4  1  1 21   3.5052     269
  4  1  1 21  1 -1  0  3  1  1 16   3.5052     269
  1  1  1 21  1  0  0  2  2  1 16   3.5052     270
  3  1  1 21 -1  0  0  4  2  1 16   3.5052     270
  2  2  1 16 -1  0  0  1  1  1 21   3.5052     271
  4  2  1 16  1  0  0  3  1  1 21   3.5052     271
  2  1  1  5 -1  0  0  2  1  1 26   3.5055     269
  2  1  1 26  1  0  0  2  1  1  5   3.5055     269
  1  1  1  5  1  0  0  1  1  1 26   3.5055     269
  1  1  1 26 -1  0  0  1  1  1  5   3.5055     269
  3  1  1  5 -1  0  0  3  1  1 26   3.5055     269
  3  1  1 26  1  0  0  3  1  1  5   3.5055     269
  2  1  1 26  1  0  0  2  2  1  5   3.5055     270
  2  2  1  5 -1  0  0  2  1  1 26   3.5055     271
  1  1  1 26 -1  0  0  1  2  1  5   3.5055     270
  1  2  1  5  1  0  0  1  1  1 26   3.5055     271
  3  1  1 26  1  0  0  3  2  1  5   3.5055     270
  3  2  1  5 -1  0  0  3  1  1 26   3.5055     271
  4  1  1  5  1  0  0  4  1  1 26   3.5055     269
  4  1  1 26 -1  0  0  4  1  1  5   3.5055     269
  4  1  1 26 -1  0  0  4  2  1  5   3.5055     270
  4  2  1  5  1  0  0  4  1  1 26   3.5055     271
  1  1  1 19  1  0  0  2  1  1  2   3.5101     273
  2  1  1  2 -1  0  0  1  1  1 19   3.5101     273
  2  1  1  2 -1  0  0  1  2  1 19   3.5101     274
  1  2  1 19  1  0  0  2  1  1  2   3.5101     275
  3  2  1 19 -1  0  0  4  2  1  2   3.5101     276
  4  2  1  2  1  0  0  3  2  1 19   3.5101     276
  1  1  1  2  1 -1  0  2  1  1 19   3.5102     273
  2  1  1 19 -1  1  0  1  1  1  2   3.5102     273
  3  1  1  2 -1  1  0  4  1  1 19   3.5102     273
  3  1  1 19 -1  0  0  4  1  1  2   3.5102     273
  4  1  1  2  1  0  0  3  1  1 19   3.5102     273
  4  1  1 19  1 -1  0  3  1  1  2   3.5102     273
  1  1  1  2  1 -1  0  2  2  1 19   3.5102     274
  1  1  1 19  1  0  0  2  2  1  2   3.5102     274
  2  1  1 19 -1  1  0  1  2  1  2   3.5102     274
  3  1  1  2 -1  1  0  4  2  1 19   3.5102     274
  3  1  1 19 -1  0  0  4  2  1  2   3.5102     274
  4  1  1  2  1  0  0  3  2  1 19   3.5102     274
  4  1  1 19  1 -1  0  3  2  1  2   3.5102     274
  1  2  1  2  1 -1  0  2  1  1 19   3.5102     275
  2  2  1  2 -1  0  0  1  1  1 19   3.5102     275
  2  2  1 19 -1  1  0  1  1  1  2   3.5102     275
  3  2  1  2 -1  1  0  4  1  1 19   3.5102     275
  3  2  1 19 -1  0  0  4  1  1  2   3.5102     275
  4  2  1  2  1  0  0  3  1  1 19   3.5102     275
  4  2  1 19  1 -1  0  3  1  1  2   3.5102     275
  1  2  1  2  1 -1  0  2  2  1 19   3.5102     276
  1  2  1 19  1  0  0  2  2  1  2   3.5102     276
  2  2  1  2 -1  0  0  1  2  1 19   3.5102     276
  2  2  1 19 -1  1  0  1  2  1  2   3.5102     276
  3  2  1  2 -1  1  0  4  2  1 19   3.5102     276
  4  2  1 19  1 -1  0  3  2  1  2   3.5102     276
  2  1  1 22 -1  0  0  2  1  1 28   3.5145     273
  2  1  1 28  1  0  0  2  1  1 22   3.5145     273
  3  1  1 22 -1  0  0  3  1  1 28   3.5145     273
  3  1  1 28  1  0  0  3  1  1 22   3.5145     273
  2  1  1 28  1  0  0  2  2  1 22   3.5145     274
  4  1  1 28 -1  0  0  4  2  1 22   3.5145     274
  4  2  1 22  1  0  0  4  1  1 28   3.5145     275
  1  1  1 22  1  0  0  1  1  1 28   3.5145     273
  1  1  1 28 -1  0  0  1  1  1 22   3.5145     273
  4  1  1 22  1  0  0  4  1  1 28   3.5145     273
  4  1  1 28 -1  0  0  4  1  1 22   3.5145     273
  1  1  1 28 -1  0  0  1  2  1 22   3.5145     274
  3  1  1 28  1  0  0  3  2  1 22   3.5145     274
  1  2  1 22  1  0  0  1  1  1 28   3.5145     275
  2  2  1 22 -1  0  0  2  1  1 28   3.5145     275
  3  2  1 22 -1  0  0  3  1  1 28   3.5145     275
  2  1  1 19 -1  1  0  4  1  1 24   3.5187     277
  4  1  1 24  1 -1  0  2  1  1 19   3.5187     277
  2  1  1 19 -1  1  0  4  2  1 24   3.5187     278
  4  1  1 24  1 -1  0  2  2  1 19   3.5187     278
  2  2  1 19 -1  1  0  4  1  1 24   3.5187     279
  4  2  1 24  1 -1  0  2  1  1 19   3.5187     279
  2  2  1 19 -1  1  0  4  2  1 24   3.5187     280
  4  2  1 24  1 -1  0  2  2  1 19   3.5187     280
  1  1  1 19  1  0  1  3  2  1 24   3.5187     278
  1  1  1 24  1  0  1  3  2  1 19   3.5187     278
  3  1  1 24 -1  0 -1  1  2  1 19   3.5187     278
  4  1  1 19  1 -1  0  2  2  1 24   3.5187     278
  1  2  1 19  1  0  1  3  1  1 24   3.5187     279
  2  2  1 24 -1  1  0  4  1  1 19   3.5187     279
  3  2  1 19 -1  0 -1  1  1  1 24   3.5187     279
  3  2  1 24 -1  0 -1  1  1  1 19   3.5187     279
  1  2  1 19  1  0  1  3  2  1 24   3.5187     280
  1  2  1 24  1  0  1  3  2  1 19   3.5187     280
  2  2  1 24 -1  1  0  4  2  1 19   3.5187     280
  3  2  1 19 -1  0 -1  1  2  1 24   3.5187     280
  3  2  1 24 -1  0 -1  1  2  1 19   3.5187     280
  4  2  1 19  1 -1  0  2  2  1 24   3.5187     280
  1  1  1 19  1  0  1  3  1  1 24   3.5187     277
  2  1  1 24 -1  1  0  4  1  1 19   3.5187     277
  3  1  1 24 -1  0 -1  1  1  1 19   3.5187     277
  4  1  1 19  1 -1  0  2  1  1 24   3.5187     277
  2  1  1 24 -1  1  0  4  2  1 19   3.5187     278
  4  2  1 19  1 -1  0  2  1  1 24   3.5187     279
  1  1  1 24  1  0  1  3  1  1 19   3.5188     277
  3  1  1 19 -1  0 -1  1  1  1 24   3.5188     277
  3  1  1 19 -1  0 -1  1  2  1 24   3.5188     278
  1  2  1 24  1  0  1  3  1  1 19   3.5188     279
  1  1  1  7  1 -1  0  2  1  1 19   3.5380     281
  1  1  1 19  1  0  0  2  1  1  7   3.5380     281
  2  1  1  7 -1  0  0  1  1  1 19   3.5380     281
  2  1  1 19 -1  1  0  1  1  1  7   3.5380     281
  3  1  1  7 -1  1  0  4  1  1 19   3.5380     281
  3  1  1 19 -1  0  0  4  1  1  7   3.5380     281
  4  1  1  7  1  0  0  3  1  1 19   3.5380     281
  4  1  1 19  1 -1  0  3  1  1  7   3.5380     281
  1  1  1  7  1 -1  0  2  2  1 19   3.5380     282
  2  1  1  7 -1  0  0  1  2  1 19   3.5380     282
  2  1  1 19 -1  1  0  1  2  1  7   3.5380     282
  3  1  1  7 -1  1  0  4  2  1 19   3.5380     282
  3  1  1 19 -1  0  0  4  2  1  7   3.5380     282
  4  1  1 19  1 -1  0  3  2  1  7   3.5380     282
  1  2  1  7  1 -1  0  2  1  1 19   3.5380     283
  1  2  1 19  1  0  0  2  1  1  7   3.5380     283
  2  2  1 19 -1  1  0  1  1  1  7   3.5380     283
  3  2  1  7 -1  1  0  4  1  1 19   3.5380     283
  4  2  1  7  1  0  0  3  1  1 19   3.5380     283
  4  2  1 19  1 -1  0  3  1  1  7   3.5380     283
  1  2  1  7  1 -1  0  2  2  1 19   3.5380     284
  2  2  1 19 -1  1  0  1  2  1  7   3.5380     284
  4  2  1 19  1 -1  0  3  2  1  7   3.5380     284
  1  1  1 19  1  0  0  2  2  1  7   3.5380     282
  2  2  1  7 -1  0  0  1  1  1 19   3.5380     283
  1  2  1 19  1  0  0  2  2  1  7   3.5380     284
  2  2  1  7 -1  0  0  1  2  1 19   3.5380     284
  3  2  1  7 -1  1  0  4  2  1 19   3.5380     284
  4  1  1  7  1  0  0  3  2  1 19   3.5381     282
  3  2  1 19 -1  0  0  4  1  1  7   3.5381     283
  3  2  1 19 -1  0  0  4  2  1  7   3.5381     284
  4  2  1  7  1  0  0  3  2  1 19   3.5381     284
  4  1  1 24  0  0  0  1  2  1 28   3.5471     286
  1  2  1 28  0  0  0  4  1  1 24   3.5471     287
  1  2  1 28  0  0  0  4  2  1 24   3.5471     288
  2  2  1 28  0  0  1  3  2  1 24   3.5471     288
  3  2  1 24  0  0 -1  2  2  1 28   3.5471     288
  4  2  1 24  0  0  0  1  2  1 28   3.5471     288
  1  1  1 24  0  0  1  4  2  1 28   3.5471     286
  3  1  1 24  0  0 -1  2  2  1 28   3.5471     286
  2  2  1 28  0  0  1  3  1  1 24   3.5471     287
  4  2  1 28  0  0 -1  1  1  1 24   3.5471     287
  1  2  1 24  0  0  1  4  2  1 28   3.5471     288
  4  2  1 28  0  0 -1  1  2  1 24   3.5471     288
  2  1  1 24  0  0  0  3  2  1 28   3.5471     286
  3  2  1 28  0  0  0  2  1  1 24   3.5471     287
  2  2  1 24  0  0  0  3  2  1 28   3.5471     288
  3  2  1 28  0  0  0  2  2  1 24   3.5471     288
  1  1  1 13  0  0  0  2  2  1 16   3.5508     286
  2  2  1 16  0  0  0  1  1  1 13   3.5508     287
  1  2  1 13  0  0  0  2  2  1 16   3.5508     288
  2  2  1 16  0  0  0  1  2  1 13   3.5508     288
  1  1  1 13  0  0  0  2  1  1 16   3.5508     285
  1  1  1 16  0 -1  0  2  1  1 13   3.5508     285
  2  1  1 13  0  1  0  1  1  1 16   3.5508     285
  2  1  1 16  0  0  0  1  1  1 13   3.5508     285
  3  1  1 13  0  0  0  4  1  1 16   3.5508     285
  4  1  1 16  0  0  0  3  1  1 13   3.5508     285
  1  1  1 16  0 -1  0  2  2  1 13   3.5508     286
  2  1  1 13  0  1  0  1  2  1 16   3.5508     286
  2  1  1 16  0  0  0  1  2  1 13   3.5508     286
  3  1  1 13  0  0  0  4  2  1 16   3.5508     286
  3  1  1 16  0  1  0  4  2  1 13   3.5508     286
  4  1  1 16  0  0  0  3  2  1 13   3.5508     286
  1  2  1 13  0  0  0  2  1  1 16   3.5508     287
  1  2  1 16  0 -1  0  2  1  1 13   3.5508     287
  2  2  1 13  0  1  0  1  1  1 16   3.5508     287
  3  2  1 13  0  0  0  4  1  1 16   3.5508     287
  4  2  1 13  0 -1  0  3  1  1 16   3.5508     287
  4  2  1 16  0  0  0  3  1  1 13   3.5508     287
  1  2  1 16  0 -1  0  2  2  1 13   3.5508     288
  2  2  1 13  0  1  0  1  2  1 16   3.5508     288
  3  2  1 13  0  0  0  4  2  1 16   3.5508     288
  3  2  1 16  0  1  0  4  2  1 13   3.5508     288
  4  2  1 13  0 -1  0  3  2  1 16   3.5508     288
  4  2  1 16  0  0  0  3  2  1 13   3.5508     288
  3  1  1 16  0  1  0  4  1  1 13   3.5508     285
  4  1  1 13  0 -1  0  3  1  1 16   3.5508     285
  4  1  1 13  0 -1  0  3  2  1 16   3.5508     286
  3  2  1 16  0  1  0  4  1  1 13   3.5508     287
  3  1  1 21 -1  0  0  4  1  1 11   3.5538     289
  4  1  1 11  1  0  0  3  1  1 21   3.5538     289
  1  1  1 11  1 -1  0  2  1  1 21   3.5538     289
  1  1  1 21  1  0  0  2  1  1 11   3.5538     289
  2  1  1 11 -1  0  0  1  1  1 21   3.5538     289
  2  1  1 21 -1  1  0  1  1  1 11   3.5538     289
  3  1  1 11 -1  1  0  4  1  1 21   3.5538     289
  4  1  1 21  1 -1  0  3  1  1 11   3.5538     289
  1  1  1 21  1  0  0  2  2  1 11   3.5538     290
  2  1  1 21 -1  1  0  1  2  1 11   3.5538     290
  3  1  1 21 -1  0  0  4  2  1 11   3.5538     290
  4  1  1 21  1 -1  0  3  2  1 11   3.5538     290
  1  2  1 11  1 -1  0  2  1  1 21   3.5538     291
  2  2  1 11 -1  0  0  1  1  1 21   3.5538     291
  3  2  1 11 -1  1  0  4  1  1 21   3.5538     291
  4  2  1 11  1  0  0  3  1  1 21   3.5538     291
  2  1  1 19 -1  1  0  1  2  1 20   3.5685     294
  4  1  1 19  1 -1  0  3  2  1 20   3.5685     294
  1  2  1 20  1 -1  0  2  1  1 19   3.5685     295
  3  2  1 20 -1  1  0  4  1  1 19   3.5685     295
  3  2  1 20 -1  1  0  4  2  1 19   3.5685     296
  4  2  1 19  1 -1  0  3  2  1 20   3.5685     296
  1  2  1 20  1 -1  0  2  2  1 19   3.5685     296
  2  2  1 19 -1  1  0  1  2  1 20   3.5685     296
  1  1  1 19  1  0  0  2  2  1 20   3.5685     294
  3  1  1 19 -1  0  0  4  2  1 20   3.5685     294
  2  2  1 20 -1  0  0  1  1  1 19   3.5685     295
  4  2  1 20  1  0  0  3  1  1 19   3.5685     295
  1  2  1 19  1  0  0  2  2  1 20   3.5685     296
  2  2  1 20 -1  0  0  1  2  1 19   3.5685     296
  3  2  1 19 -1  0  0  4  2  1 20   3.5685     296
  4  2  1 20  1  0  0  3  2  1 19   3.5685     296
  4  1  1 24  1 -1  0  2  2  1 14   3.5724     294
  2  2  1 14 -1  1  0  4  1  1 24   3.5724     295
  2  2  1 14 -1  1  0  4  2  1 24   3.5724     296
  4  2  1 24  1 -1  0  2  2  1 14   3.5724     296
  2  1  1 14 -1  1  0  4  1  1 24   3.5724     293
  4  1  1 24  1 -1  0  2  1  1 14   3.5724     293
  2  1  1 14 -1  1  0  4  2  1 24   3.5724     294
  4  1  1 14  1 -1  0  2  2  1 24   3.5724     294
  2  2  1 24 -1  1  0  4  1  1 14   3.5724     295
  4  2  1 24  1 -1  0  2  1  1 14   3.5724     295
  2  2  1 24 -1  1  0  4  2  1 14   3.5724     296
  4  2  1 14  1 -1  0  2  2  1 24   3.5724     296
  1  1  1 14  1  0  1  3  1  1 24   3.5724     293
  3  1  1 24 -1  0 -1  1  1  1 14   3.5724     293
  1  1  1 14  1  0  1  3  2  1 24   3.5724     294
  1  1  1 24  1  0  1  3  2  1 14   3.5724     294
  2  1  1 24 -1  1  0  4  2  1 14   3.5724     294
  3  1  1 24 -1  0 -1  1  2  1 14   3.5724     294
  1  2  1 14  1  0  1  3  1  1 24   3.5724     295
  3  2  1 14 -1  0 -1  1  1  1 24   3.5724     295
  3  2  1 24 -1  0 -1  1  1  1 14   3.5724     295
  4  2  1 14  1 -1  0  2  1  1 24   3.5724     295
  1  2  1 14  1  0  1  3  2  1 24   3.5724     296
  1  2  1 24  1  0  1  3  2  1 14   3.5724     296
  3  2  1 14 -1  0 -1  1  2  1 24   3.5724     296
  3  2  1 24 -1  0 -1  1  2  1 14   3.5724     296
  1  1  1 24  1  0  1  3  1  1 14   3.5724     293
  2  1  1 24 -1  1  0  4  1  1 14   3.5724     293
  3  1  1 14 -1  0 -1  1  1  1 24   3.5724     293
  4  1  1 14  1 -1  0  2  1  1 24   3.5724     293
  3  1  1 14 -1  0 -1  1  2  1 24   3.5724     294
  1  2  1 24  1  0  1  3  1  1 14   3.5724     295
  4  1  1 11  1  0  0  3  2  1 27   3.5791     298
  3  2  1 27 -1  0  0  4  1  1 11   3.5791     299
  1  1  1 11  1 -1  0  2  2  1 27   3.5792     298
  2  1  1 11 -1  0  0  1  2  1 27   3.5792     298
  1  2  1 27  1  0  0  2  1  1 11   3.5792     299
  2  2  1 27 -1  1  0  1  1  1 11   3.5792     299
  1  2  1 11  1 -1  0  2  2  1 27   3.5792     300
  1  2  1 27  1  0  0  2  2  1 11   3.5792     300
  2  2  1 11 -1  0  0  1  2  1 27   3.5792     300
  2  2  1 27 -1  1  0  1  2  1 11   3.5792     300
  3  2  1 11 -1  1  0  4  2  1 27   3.5792     300
  3  2  1 27 -1  0  0  4  2  1 11   3.5792     300
  4  2  1 11  1  0  0  3  2  1 27   3.5792     300
  4  2  1 27  1 -1  0  3  2  1 11   3.5792     300
  3  1  1 11 -1  1  0  4  2  1 27   3.5792     298
  4  2  1 27  1 -1  0  3  1  1 11   3.5792     299
  2  2  1 20 -1  1  0  4  2  1 28   3.5803     300
  4  2  1 28  1 -1  0  2  2  1 20   3.5803     300
  1  2  1 20  1  0  1  3  2  1 28   3.5803     300
  3  2  1 28 -1  0 -1  1  2  1 20   3.5803     300
  2  2  1 28 -1  1  0  4  2  1 20   3.5803     300
  4  2  1 20  1 -1  0  2  2  1 28   3.5803     300
  1  2  1 28  1  0  1  3  2  1 20   3.5803     300
  3  2  1 20 -1  0 -1  1  2  1 28   3.5803     300
  2  1  1 28 -1  1  0  4  1  1 22   3.5809     297
  4  1  1 22  1 -1  0  2  1  1 28   3.5809     297
  1  1  1 22  1  0  1  3  1  1 28   3.5809     297
  1  1  1 28  1  0  1  3  1  1 22   3.5809     297
  3  1  1 22 -1  0 -1  1  1  1 28   3.5809     297
  3  1  1 28 -1  0 -1  1  1  1 22   3.5809     297
  1  1  1 28  1  0  1  3  2  1 22   3.5809     298
  2  1  1 28 -1  1  0  4  2  1 22   3.5809     298
  3  1  1 28 -1  0 -1  1  2  1 22   3.5809     298
  4  1  1 28  1 -1  0  2  2  1 22   3.5809     298
  1  2  1 22  1  0  1  3  1  1 28   3.5809     299
  2  2  1 22 -1  1  0  4  1  1 28   3.5809     299
  3  2  1 22 -1  0 -1  1  1  1 28   3.5809     299
  4  2  1 22  1 -1  0  2  1  1 28   3.5809     299
  2  1  1 22 -1  1  0  4  1  1 28   3.5809     297
  4  1  1 28  1 -1  0  2  1  1 22   3.5809     297
  4  2  1  6  1 -1  0  2  2  1 19   3.5820     300
  2  1  1 19 -1  1  0  4  1  1  6   3.5820     297
  4  1  1  6  1 -1  0  2  1  1 19   3.5820     297
  2  1  1 19 -1  1  0  4  2  1  6   3.5820     298
  4  1  1  6  1 -1  0  2  2  1 19   3.5820     298
  2  2  1 19 -1  1  0  4  1  1  6   3.5820     299
  4  2  1  6  1 -1  0  2  1  1 19   3.5820     299
  2  2  1 19 -1  1  0  4  2  1  6   3.5820     300
  1  1  1  6  1  0  1  3  2  1 19   3.5820     298
  1  1  1 19  1  0  1  3  2  1  6   3.5820     298
  4  1  1 19  1 -1  0  2  2  1  6   3.5820     298
  2  2  1  6 -1  1  0  4  1  1 19   3.5820     299
  3  2  1  6 -1  0 -1  1  1  1 19   3.5820     299
  3  2  1 19 -1  0 -1  1  1  1  6   3.5820     299
  1  2  1  6  1  0  1  3  2  1 19   3.5820     300
  1  2  1 19  1  0  1  3  2  1  6   3.5820     300
  2  2  1  6 -1  1  0  4  2  1 19   3.5820     300
  3  2  1  6 -1  0 -1  1  2  1 19   3.5820     300
  3  2  1 19 -1  0 -1  1  2  1  6   3.5820     300
  4  2  1 19  1 -1  0  2  2  1  6   3.5820     300
  1  1  1 19  1  0  1  3  1  1  6   3.5820     297
  2  1  1  6 -1  1  0  4  1  1 19   3.5820     297
  3  1  1  6 -1  0 -1  1  1  1 19   3.5820     297
  4  1  1 19  1 -1  0  2  1  1  6   3.5820     297
  2  1  1  6 -1  1  0  4  2  1 19   3.5820     298
  3  1  1  6 -1  0 -1  1  2  1 19   3.5820     298
  1  2  1 19  1  0  1  3  1  1  6   3.5820     299
  4  2  1 19  1 -1  0  2  1  1  6   3.5820     299
  1  1  1  6  1  0  1  3  1  1 19   3.5820     297
  3  1  1 19 -1  0 -1  1  1  1  6   3.5820     297
  3  1  1 19 -1  0 -1  1  2  1  6   3.5820     298
  1  2  1  6  1  0  1  3  1  1 19   3.5820     299
  4  1  1 16  1  0  0  3  2  1 21   3.5841     298
  3  2  1 21 -1  0  0  4  1  1 16   3.5841     299
  1  1  1 16  1 -1  0  2  2  1 21   3.5841     298
  2  1  1 16 -1  0  0  1  2  1 21   3.5841     298
  1  2  1 21  1  0  0  2  1  1 16   3.5841     299
  2  2  1 21 -1  1  0  1  1  1 16   3.5841     299
  1  2  1 16  1 -1  0  2  2  1 21   3.5841     300
  1  2  1 21  1  0  0  2  2  1 16   3.5841     300
  2  2  1 16 -1  0  0  1  2  1 21   3.5841     300
  2  2  1 21 -1  1  0  1  2  1 16   3.5841     300
  3  2  1 16 -1  1  0  4  2  1 21   3.5841     300
  4  2  1 21  1 -1  0  3  2  1 16   3.5841     300
  3  1  1 16 -1  1  0  4  2  1 21   3.5841     298
  4  2  1 21  1 -1  0  3  1  1 16   3.5841     299
  3  2  1 21 -1  0  0  4  2  1 16   3.5841     300
  4  2  1 16  1  0  0  3  2  1 21   3.5841     300
  2  1  1 24 -1  0  0  4  1  1 20   3.5866     301
  4  1  1 20  1  0  0  2  1  1 24   3.5866     301
  1  1  1 20  1 -1  1  3  1  1 24   3.5867     301
  1  1  1 24  1 -1  1  3  1  1 20   3.5867     301
  3  1  1 20 -1  1 -1  1  1  1 24   3.5867     301
  3  1  1 24 -1  1 -1  1  1  1 20   3.5867     301
  1  1  1 20  1 -1  1  3  2  1 24   3.5867     302
  3  1  1 20 -1  1 -1  1  2  1 24   3.5867     302
  4  1  1 20  1  0  0  2  2  1 24   3.5867     302
  1  2  1 24  1 -1  1  3  1  1 20   3.5867     303
  2  2  1 24 -1  0  0  4  1  1 20   3.5867     303
  3  2  1 24 -1  1 -1  1  1  1 20   3.5867     303
  2  1  1 20 -1  0  0  4  1  1 24   3.5867     301
  4  1  1 24  1  0  0  2  1  1 20   3.5867     301
  2  1  1 20 -1  0  0  4  2  1 24   3.5867     302
  4  2  1 24  1  0  0  2  1  1 20   3.5867     303
  2  1  1 15 -1  0  0  1  2  1 28   3.5886     302
  1  2  1 28  1  0  0  2  1  1 15   3.5886     303
  1  2  1 28  1  0  0  2  2  1 15   3.5886     304
  2  2  1 15 -1  0  0  1  2  1 28   3.5886     304
  1  1  1 15  1 -1  0  2  2  1 28   3.5886     302
  3  1  1 15 -1  1  0  4  2  1 28   3.5886     302
  4  1  1 15  1  0  0  3  2  1 28   3.5886     302
  2  2  1 28 -1  1  0  1  1  1 15   3.5886     303
  3  2  1 28 -1  0  0  4  1  1 15   3.5886     303
  4  2  1 28  1 -1  0  3  1  1 15   3.5886     303
  1  2  1 15  1 -1  0  2  2  1 28   3.5886     304
  2  2  1 28 -1  1  0  1  2  1 15   3.5886     304
  3  2  1 15 -1  1  0  4  2  1 28   3.5886     304
  3  2  1 28 -1  0  0  4  2  1 15   3.5886     304
  4  2  1 15  1  0  0  3  2  1 28   3.5886     304
  4  2  1 28  1 -1  0  3  2  1 15   3.5886     304
  1  1  1 24  1 -1  1  3  2  1 20   3.5918     306
  3  2  1 20 -1  1 -1  1  1  1 24   3.5918     307
  1  2  1 24  1 -1  1  3  2  1 20   3.5918     308
  3  2  1 20 -1  1 -1  1  2  1 24   3.5918     308
  3  1  1 24 -1  1 -1  1  2  1 20   3.5918     306
  1  2  1 20  1 -1  1  3  1  1 24   3.5918     307
  1  2  1 20  1 -1  1  3  2  1 24   3.5918     308
  3  2  1 24 -1  1 -1  1  2  1 20   3.5918     308
  2  1  1 24 -1  0  0  4  2  1 20   3.5918     306
  4  2  1 20  1  0  0  2  1  1 24   3.5918     307
  4  1  1 24  1  0  0  2  2  1 20   3.5919     306
  2  2  1 20 -1  0  0  4  1  1 24   3.5919     307
  2  2  1 20 -1  0  0  4  2  1 24   3.5919     308
  2  2  1 24 -1  0  0  4  2  1 20   3.5919     308
  4  2  1 20  1  0  0  2  2  1 24   3.5919     308
  4  2  1 24  1  0  0  2  2  1 20   3.5919     308
  1  1  1 20  1  0  1  3  2  1 28   3.5980     310
  2  1  1 20 -1  1  0  4  2  1 28   3.5980     310
  3  2  1 28 -1  0 -1  1  1  1 20   3.5980     311
  4  2  1 28  1 -1  0  2  1  1 20   3.5980     311
  3  1  1 20 -1  0 -1  1  2  1 28   3.5981     310
  4  1  1 20  1 -1  0  2  2  1 28   3.5981     310
  1  2  1 28  1  0  1  3  1  1 20   3.5981     311
  2  2  1 28 -1  1  0  4  1  1 20   3.5981     311
  4  1  1 22  1 -1  0  2  2  1 10   3.6032     314
  2  2  1 10 -1  1  0  4  1  1 22   3.6032     315
  2  1  1 10 -1  1  0  4  1  1 22   3.6032     313
  4  1  1 22  1 -1  0  2  1  1 10   3.6032     313
  2  2  1 10 -1  1  0  4  2  1 22   3.6032     316
  4  2  1 22  1 -1  0  2  2  1 10   3.6032     316
  1  1  1 10  1  0  1  3  2  1 22   3.6032     314
  2  1  1 10 -1  1  0  4  2  1 22   3.6032     314
  3  2  1 22 -1  0 -1  1  1  1 10   3.6032     315
  4  2  1 22  1 -1  0  2  1  1 10   3.6032     315
  1  2  1 10  1  0  1  3  2  1 22   3.6032     316
  2  2  1 22 -1  1  0  4  2  1 10   3.6032     316
  3  2  1 22 -1  0 -1  1  2  1 10   3.6032     316
  4  2  1 10  1 -1  0  2  2  1 22   3.6032     316
  1  1  1 10  1  0  1  3  1  1 22   3.6033     313
  1  1  1 22  1  0  1  3  1  1 10   3.6033     313
  3  1  1 10 -1  0 -1  1  1  1 22   3.6033     313
  3  1  1 22 -1  0 -1  1  1  1 10   3.6033     313
  1  1  1 22  1  0  1  3  2  1 10   3.6033     314
  2  1  1 22 -1  1  0  4  2  1 10   3.6033     314
  3  1  1 10 -1  0 -1  1  2  1 22   3.6033     314
  3  1  1 22 -1  0 -1  1  2  1 10   3.6033     314
  4  1  1 10  1 -1  0  2  2  1 22   3.6033     314
  1  2  1 10  1  0  1  3  1  1 22   3.6033     315
  1  2  1 22  1  0  1  3  1  1 10   3.6033     315
  2  2  1 22 -1  1  0  4  1  1 10   3.6033     315
  3  2  1 10 -1  0 -1  1  1  1 22   3.6033     315
  4  2  1 10  1 -1  0  2  1  1 22   3.6033     315
  1  2  1 22  1  0  1  3  2  1 10   3.6033     316
  3  2  1 10 -1  0 -1  1  2  1 22   3.6033     316
  2  1  1 22 -1  1  0  4  1  1 10   3.6033     313
  4  1  1 10  1 -1  0  2  1  1 22   3.6033     313
  1  1  1  4  2  0  1  3  2  1 26   3.6104     318
  2  1  1  4 -2  1  0  4  2  1 26   3.6104     318
  4  1  1  4  2 -1  0  2  2  1 26   3.6104     318
  2  2  1 26 -2  1  0  4  1  1  4   3.6104     319
  3  2  1 26 -2  0 -1  1  1  1  4   3.6104     319
  4  2  1 26  2 -1  0  2  1  1  4   3.6104     319
  1  2  1  4  2  0  1  3  2  1 26   3.6104     320
  1  2  1 26  2  0  1  3  2  1  4   3.6104     320
  2  2  1  4 -2  1  0  4  2  1 26   3.6104     320
  3  2  1  4 -2  0 -1  1  2  1 26   3.6104     320
  3  2  1 26 -2  0 -1  1  2  1  4   3.6104     320
  4  2  1 26  2 -1  0  2  2  1  4   3.6104     320
  3  1  1  4 -2  0 -1  1  2  1 26   3.6104     318
  1  2  1 26  2  0  1  3  1  1  4   3.6104     319
  2  2  1 26 -2  1  0  4  2  1  4   3.6104     320
  4  2  1  4  2 -1  0  2  2  1 26   3.6104     320
  2  2  1 26 -1  1  0  4  2  1  7   3.6153     320
  4  2  1  7  1 -1  0  2  2  1 26   3.6153     320
  1  1  1  7  1  0  1  3  2  1 26   3.6153     318
  4  1  1  7  1 -1  0  2  2  1 26   3.6153     318
  2  2  1 26 -1  1  0  4  1  1  7   3.6153     319
  3  2  1 26 -1  0 -1  1  1  1  7   3.6153     319
  1  2  1  7  1  0  1  3  2  1 26   3.6153     320
  2  2  1  7 -1  1  0  4  2  1 26   3.6153     320
  3  2  1 26 -1  0 -1  1  2  1  7   3.6153     320
  4  2  1 26  1 -1  0  2  2  1  7   3.6153     320
  2  1  1  7 -1  1  0  4  2  1 26   3.6153     318
  3  1  1  7 -1  0 -1  1  2  1 26   3.6153     318
  1  2  1 26  1  0  1  3  1  1  7   3.6153     319
  4  2  1 26  1 -1  0  2  1  1  7   3.6153     319
  1  2  1 26  1  0  1  3  2  1  7   3.6153     320
  3  2  1  7 -1  0 -1  1  2  1 26   3.6153     320
  4  1  1 11  1  0  0  3  2  1 21   3.6208     322
  3  2  1 21 -1  0  0  4  1  1 11   3.6208     323
  1  1  1 11  1 -1  0  2  2  1 21   3.6208     322
  2  2  1 21 -1  1  0  1  1  1 11   3.6208     323
  1  2  1 11  1 -1  0  2  2  1 21   3.6208     324
  2  2  1 21 -1  1  0  1  2  1 11   3.6208     324
  2  1  1 11 -1  0  0  1  2  1 21   3.6208     322
  3  1  1 11 -1  1  0  4  2  1 21   3.6208     322
  1  2  1 21  1  0  0  2  1  1 11   3.6208     323
  4  2  1 21  1 -1  0  3  1  1 11   3.6208     323
  1  2  1 21  1  0  0  2  2  1 11   3.6208     324
  2  2  1 11 -1  0  0  1  2  1 21   3.6208     324
  3  2  1 11 -1  1  0  4  2  1 21   3.6208     324
  3  2  1 21 -1  0  0  4  2  1 11   3.6208     324
  4  2  1 11  1  0  0  3  2  1 21   3.6208     324
  4  2  1 21  1 -1  0  3  2  1 11   3.6208     324
  2  1  1 11  1  0  0  2  1  1 22   3.6224     321
  2  1  1 22 -1  0  0  2  1  1 11   3.6224     321
  2  1  1 22 -1  0  0  2  2  1 11   3.6224     322
  2  2  1 11  1  0  0  2  1  1 22   3.6224     323
  2  1  1 11  1  0  0  2  2  1 22   3.6224     322
  2  2  1 22 -1  0  0  2  1  1 11   3.6224     323
  2  2  1 11  1  0  0  2  2  1 22   3.6224     324
  2  2  1 22 -1  0  0  2  2  1 11   3.6224     324
  1  1  1 11 -1  0  0  1  1  1 22   3.6224     321
  1  1  1 22  1  0  0  1  1  1 11   3.6224     321
  3  1  1 11  1  0  0  3  1  1 22   3.6224     321
  3  1  1 22 -1  0  0  3  1  1 11   3.6224     321
  1  1  1 11 -1  0  0  1  2  1 22   3.6224     322
  1  1  1 22  1  0  0  1  2  1 11   3.6224     322
  3  1  1 22 -1  0  0  3  2  1 11   3.6224     322
  1  2  1 11 -1  0  0  1  1  1 22   3.6224     323
  1  2  1 22  1  0  0  1  1  1 11   3.6224     323
  3  2  1 11  1  0  0  3  1  1 22   3.6224     323
  1  2  1 11 -1  0  0  1  2  1 22   3.6224     324
  1  2  1 22  1  0  0  1  2  1 11   3.6224     324
  4  2  1 11 -1  0  0  4  2  1 22   3.6224     324
  4  2  1 22  1  0  0  4  2  1 11   3.6224     324
  3  1  1 11  1  0  0  3  2  1 22   3.6225     322
  4  1  1 22  1  0  0  4  2  1 11   3.6225     322
  3  2  1 22 -1  0  0  3  1  1 11   3.6225     323
  4  2  1 11 -1  0  0  4  1  1 22   3.6225     323
  2  2  1 21 -1  1  0  4  2  1 25   3.6225     324
  3  2  1 11  1  0  0  3  2  1 22   3.6225     324
  3  2  1 22 -1  0  0  3  2  1 11   3.6225     324
  4  2  1 25  1 -1  0  2  2  1 21   3.6225     324
  4  1  1 11 -1  0  0  4  1  1 22   3.6225     321
  4  1  1 22  1  0  0  4  1  1 11   3.6225     321
  1  1  1 25  1  0  1  3  2  1 21   3.6225     322
  4  1  1 11 -1  0  0  4  2  1 22   3.6225     322
  4  1  1 25  1 -1  0  2  2  1 21   3.6225     322
  2  2  1 21 -1  1  0  4  1  1 25   3.6225     323
  3  2  1 21 -1  0 -1  1  1  1 25   3.6225     323
  4  2  1 22  1  0  0  4  1  1 11   3.6225     323
  1  2  1 25  1  0  1  3  2  1 21   3.6225     324
  2  2  1 25 -1  1  0  4  2  1 21   3.6225     324
  3  2  1 21 -1  0 -1  1  2  1 25   3.6225     324
  4  2  1 21  1 -1  0  2  2  1 25   3.6225     324
  2  1  1 25 -1  1  0  4  2  1 21   3.6225     322
  3  1  1 25 -1  0 -1  1  2  1 21   3.6225     322
  1  2  1 21  1  0  1  3  1  1 25   3.6225     323
  4  2  1 21  1 -1  0  2  1  1 25   3.6225     323
  1  2  1 21  1  0  1  3  2  1 25   3.6225     324
  3  2  1 25 -1  0 -1  1  2  1 21   3.6225     324
  4  1  1  5  1 -1  0  2  2  1 15   3.6239     322
  2  2  1 15 -1  1  0  4  1  1  5   3.6239     323
  2  1  1 15 -1  1  0  4  1  1  5   3.6239     321
  4  1  1  5  1 -1  0  2  1  1 15   3.6239     321
  2  1  1 15 -1  1  0  4  2  1  5   3.6239     322
  4  2  1  5  1 -1  0  2  1  1 15   3.6239     323
  2  2  1 15 -1  1  0  4  2  1  5   3.6239     324
  4  2  1  5  1 -1  0  2  2  1 15   3.6239     324
  1  1  1 15  1  0  1  3  2  1  5   3.6239     322
  4  1  1 15  1 -1  0  2  2  1  5   3.6239     322
  2  2  1  5 -1  1  0  4  1  1 15   3.6239     323
  3  2  1  5 -1  0 -1  1  1  1 15   3.6239     323
  1  2  1 15  1  0  1  3  2  1  5   3.6239     324
  2  2  1  5 -1  1  0  4  2  1 15   3.6239     324
  3  2  1  5 -1  0 -1  1  2  1 15   3.6239     324
  3  2  1 15 -1  0 -1  1  2  1  5   3.6239     324
  4  2  1 15  1 -1  0  2  2  1  5   3.6239     324
  1  1  1  5  1  0  1  3  1  1 15   3.6239     321
  1  1  1 15  1  0  1  3  1  1  5   3.6239     321
  3  1  1  5 -1  0 -1  1  1  1 15   3.6239     321
  3  1  1 15 -1  0 -1  1  1  1  5   3.6239     321
  1  1  1  5  1  0  1  3  2  1 15   3.6239     322
  2  1  1  5 -1  1  0  4  2  1 15   3.6239     322
  3  1  1  5 -1  0 -1  1  2  1 15   3.6239     322
  3  1  1 15 -1  0 -1  1  2  1  5   3.6239     322
  1  2  1  5  1  0  1  3  1  1 15   3.6239     323
  1  2  1 15  1  0  1  3  1  1  5   3.6239     323
  3  2  1 15 -1  0 -1  1  1  1  5   3.6239     323
  4  2  1 15  1 -1  0  2  1  1  5   3.6239     323
  1  2  1  5  1  0  1  3  2  1 15   3.6239     324
  2  1  1  5 -1  1  0  4  1  1 15   3.6239     321
  4  1  1 15  1 -1  0  2  1  1  5   3.6239     321
  2  1  1 13 -1  1  0  4  1  1 23   3.6319     325
  4  1  1 23  1 -1  0  2  1  1 13   3.6319     325
  4  1  1 23  1 -1  0  2  2  1 13   3.6319     326
  2  2  1 13 -1  1  0  4  1  1 23   3.6319     327
  2  1  1 13 -1  1  0  4  2  1 23   3.6319     326
  4  2  1 23  1 -1  0  2  1  1 13   3.6319     327
  2  2  1 13 -1  1  0  4  2  1 23   3.6319     328
  4  2  1 23  1 -1  0  2  2  1 13   3.6319     328
  1  1  1 13  1  0  1  3  2  1 23   3.6319     326
  3  2  1 23 -1  0 -1  1  1  1 13   3.6319     327
  1  2  1 13  1  0  1  3  2  1 23   3.6319     328
  3  2  1 23 -1  0 -1  1  2  1 13   3.6319     328
  1  1  1 23  1  0  1  3  2  1 13   3.6320     326
  3  1  1 23 -1  0 -1  1  2  1 13   3.6320     326
  1  2  1 13  1  0  1  3  1  1 23   3.6320     327
  3  2  1 13 -1  0 -1  1  1  1 23   3.6320     327
  1  2  1 23  1  0  1  3  2  1 13   3.6320     328
  2  2  1 23 -1  1  0  4  2  1 13   3.6320     328
  3  2  1 13 -1  0 -1  1  2  1 23   3.6320     328
  4  2  1 13  1 -1  0  2  2  1 23   3.6320     328
  1  1  1 13  1  0  1  3  1  1 23   3.6320     325
  1  1  1 23  1  0  1  3  1  1 13   3.6320     325
  3  1  1 13 -1  0 -1  1  1  1 23   3.6320     325
  3  1  1 23 -1  0 -1  1  1  1 13   3.6320     325
  2  1  1 23 -1  1  0  4  2  1 13   3.6320     326
  3  1  1 13 -1  0 -1  1  2  1 23   3.6320     326
  4  1  1 13  1 -1  0  2  2  1 23   3.6320     326
  1  2  1 23  1  0  1  3  1  1 13   3.6320     327
  2  2  1 23 -1  1  0  4  1  1 13   3.6320     327
  4  2  1 13  1 -1  0  2  1  1 23   3.6320     327
  2  1  1 23 -1  1  0  4  1  1 13   3.6320     325
  4  1  1 13  1 -1  0  2  1  1 23   3.6320     325
  3  1  1 12  0  0  0  4  1  1 27   3.6323     325
  4  1  1 27  0  0  0  3  1  1 12   3.6323     325
  3  1  1 27  0  1  0  4  2  1 12   3.6323     326
  4  2  1 12  0 -1  0  3  1  1 27   3.6323     327
  1  1  1 12  0  0  0  2  1  1 27   3.6323     325
  1  1  1 27  0 -1  0  2  1  1 12   3.6323     325
  2  1  1 12  0  1  0  1  1  1 27   3.6323     325
  2  1  1 27  0  0  0  1  1  1 12   3.6323     325
  3  1  1 27  0  1  0  4  1  1 12   3.6323     325
  4  1  1 12  0 -1  0  3  1  1 27   3.6323     325
  1  1  1 27  0 -1  0  2  2  1 12   3.6323     326
  2  1  1 27  0  0  0  1  2  1 12   3.6323     326
  4  1  1 27  0  0  0  3  2  1 12   3.6323     326
  1  2  1 12  0  0  0  2  1  1 27   3.6323     327
  2  2  1 12  0  1  0  1  1  1 27   3.6323     327
  3  2  1 12  0  0  0  4  1  1 27   3.6323     327
  1  1  1 28  0  0  1  4  1  1 11   3.6348     325
  2  1  1 28  0  0  0  3  1  1 11   3.6348     325
  3  1  1 11  0  0  0  2  1  1 28   3.6348     325
  4  1  1 11  0  0 -1  1  1  1 28   3.6348     325
  2  1  1 28  0  0  0  3  2  1 11   3.6348     326
  3  2  1 11  0  0  0  2  1  1 28   3.6348     327
  1  1  1 11  0  0  0  4  1  1 28   3.6348     325
  4  1  1 28  0  0  0  1  1  1 11   3.6348     325
  1  1  1 28  0  0  1  4  2  1 11   3.6348     326
  4  1  1 28  0  0  0  1  2  1 11   3.6348     326
  1  2  1 11  0  0  0  4  1  1 28   3.6348     327
  4  2  1 11  0  0 -1  1  1  1 28   3.6348     327
  2  1  1  4 -1  0  0  2  1  1 16   3.6348     325
  2  1  1 11  0  0  1  3  1  1 28   3.6348     325
  2  1  1 16  1  0  0  2  1  1  4   3.6348     325
  3  1  1 28  0  0 -1  2  1  1 11   3.6348     325
  2  1  1  4 -1  0  0  2  2  1 16   3.6348     326
  3  1  1 28  0  0 -1  2  2  1 11   3.6348     326
  2  2  1 11  0  0  1  3  1  1 28   3.6348     327
  2  2  1 16  1  0  0  2  1  1  4   3.6348     327
  3  1  1 16  1  0  0  3  1  1  4   3.6348     325
  2  1  1 16  1  0  0  2  2  1  4   3.6348     326
  2  2  1  4 -1  0  0  2  1  1 16   3.6348     327
  2  2  1  4 -1  0  0  2  2  1 16   3.6348     328
  2  2  1 16  1  0  0  2  2  1  4   3.6348     328
  1  1  1  4  1  0  0  1  1  1 16   3.6348     325
  1  1  1 16 -1  0  0  1  1  1  4   3.6348     325
  3  1  1  4 -1  0  0  3  1  1 16   3.6348     325
  1  1  1  4  1  0  0  1  2  1 16   3.6348     326
  1  1  1 16 -1  0  0  1  2  1  4   3.6348     326
  3  1  1  4 -1  0  0  3  2  1 16   3.6348     326
  1  2  1  4  1  0  0  1  1  1 16   3.6348     327
  1  2  1 16 -1  0  0  1  1  1  4   3.6348     327
  3  2  1 16  1  0  0  3  1  1  4   3.6348     327
  1  2  1  4  1  0  0  1  2  1 16   3.6348     328
  1  2  1 16 -1  0  0  1  2  1  4   3.6348     328
  3  1  1 16  1  0  0  3  2  1  4   3.6348     326
  4  1  1  4  1  0  0  4  2  1 16   3.6348     326
  3  2  1  4 -1  0  0  3  1  1 16   3.6348     327
  4  2  1 16 -1  0  0  4  1  1  4   3.6348     327
  4  2  1  4  1  0  0  4  2  1 16   3.6348     328
  4  2  1 16 -1  0  0  4  2  1  4   3.6348     328
  3  2  1  4 -1  0  0  3  2  1 16   3.6349     328
  3  2  1 16  1  0  0  3  2  1  4   3.6349     328
  4  1  1  4  1  0  0  4  1  1 16   3.6349     325
  4  1  1 16 -1  0  0  4  1  1  4   3.6349     325
  4  1  1 16 -1  0  0  4  2  1  4   3.6349     326
  4  2  1  4  1  0  0  4  1  1 16   3.6349     327
  1  1  1 26  1 -1  0  2  2  1 28   3.6372     330
  3  1  1 26 -1  1  0  4  2  1 28   3.6372     330
  4  1  1 26  1  0  0  3  2  1 28   3.6372     330
  2  2  1 28 -1  1  0  1  1  1 26   3.6372     331
  3  2  1 28 -1  0  0  4  1  1 26   3.6372     331
  4  2  1 28  1 -1  0  3  1  1 26   3.6372     331
  2  1  1 26 -1  0  0  1  2  1 28   3.6372     330
  1  2  1 28  1  0  0  2  1  1 26   3.6372     331
  2  2  1  9 -1  1  0  4  1  1 22   3.6382     331
  2  1  1  9 -1  1  0  4  1  1 22   3.6382     329
  4  1  1 22  1 -1  0  2  1  1  9   3.6382     329
  4  1  1 22  1 -1  0  2  2  1  9   3.6382     330
  2  2  1  9 -1  1  0  4  2  1 22   3.6382     332
  4  2  1 22  1 -1  0  2  2  1  9   3.6382     332
  1  1  1  9  1  0  1  3  2  1 22   3.6382     330
  2  1  1  9 -1  1  0  4  2  1 22   3.6382     330
  3  2  1 22 -1  0 -1  1  1  1  9   3.6382     331
  4  2  1 22  1 -1  0  2  1  1  9   3.6382     331
  1  2  1  9  1  0  1  3  2  1 22   3.6382     332
  2  2  1 22 -1  1  0  4  2  1  9   3.6382     332
  3  2  1 22 -1  0 -1  1  2  1  9   3.6382     332
  4  2  1  9  1 -1  0  2  2  1 22   3.6382     332
  1  1  1  9  1  0  1  3  1  1 22   3.6382     329
  1  1  1 22  1  0  1  3  1  1  9   3.6382     329
  3  1  1  9 -1  0 -1  1  1  1 22   3.6382     329
  3  1  1 22 -1  0 -1  1  1  1  9   3.6382     329
  1  1  1 22  1  0  1  3  2  1  9   3.6382     330
  2  1  1 22 -1  1  0  4  2  1  9   3.6382     330
  3  1  1  9 -1  0 -1  1  2  1 22   3.6382     330
  3  1  1 22 -1  0 -1  1  2  1  9   3.6382     330
  4  1  1  9  1 -1  0  2  2  1 22   3.6382     330
  1  2  1  9  1  0  1  3  1  1 22   3.6382     331
  1  2  1 22  1  0  1  3  1  1  9   3.6382     331
  2  2  1 22 -1  1  0  4  1  1  9   3.6382     331
  3  2  1  9 -1  0 -1  1  1  1 22   3.6382     331
  4  2  1  9  1 -1  0  2  1  1 22   3.6382     331
  1  2  1 22  1  0  1  3  2  1  9   3.6382     332
  3  2  1  9 -1  0 -1  1  2  1 22   3.6382     332
  2  1  1 22 -1  1  0  4  1  1  9   3.6382     329
  4  1  1  9  1 -1  0  2  1  1 22   3.6382     329
  1  1  1 18  1  0  0  2  1  1 23   3.6391     329
  2  1  1 23 -1  0  0  1  1  1 18   3.6391     329
  3  1  1 23 -1  1  0  4  1  1 18   3.6391     329
  4  1  1 18  1 -1  0  3  1  1 23   3.6391     329
  2  1  1 23 -1  0  0  1  2  1 18   3.6391     330
  3  1  1 23 -1  1  0  4  2  1 18   3.6391     330
  1  2  1 18  1  0  0  2  1  1 23   3.6391     331
  4  2  1 18  1 -1  0  3  1  1 23   3.6391     331
  1  1  1 23  1 -1  0  2  1  1 18   3.6391     329
  2  1  1 18 -1  1  0  1  1  1 23   3.6391     329
  1  1  1 18  1  0  0  2  2  1 23   3.6391     330
  1  1  1 23  1 -1  0  2  2  1 18   3.6391     330
  2  1  1 18 -1  1  0  1  2  1 23   3.6391     330
  3  1  1 18 -1  0  0  4  2  1 23   3.6391     330
  1  2  1 23  1 -1  0  2  1  1 18   3.6391     331
  2  2  1 18 -1  1  0  1  1  1 23   3.6391     331
  2  2  1 23 -1  0  0  1  1  1 18   3.6391     331
  4  2  1 23  1  0  0  3  1  1 18   3.6391     331
  1  2  1 18  1  0  0  2  2  1 23   3.6391     332
  1  2  1 23  1 -1  0  2  2  1 18   3.6391     332
  2  2  1 18 -1  1  0  1  2  1 23   3.6391     332
  2  2  1 23 -1  0  0  1  2  1 18   3.6391     332
  3  2  1 23 -1  1  0  4  2  1 18   3.6391     332
  4  2  1 18  1 -1  0  3  2  1 23   3.6391     332
  3  1  1 18 -1  0  0  4  1  1 23   3.6391     329
  4  1  1 23  1  0  0  3  1  1 18   3.6391     329
  4  1  1 18  1 -1  0  3  2  1 23   3.6391     330
  3  2  1 23 -1  1  0  4  1  1 18   3.6391     331
  3  2  1 18 -1  0  0  4  2  1 23   3.6391     332
  4  2  1 23  1  0  0  3  2  1 18   3.6391     332
  4  1  1 23  1  0  0  3  2  1 18   3.6391     330
  3  2  1 18 -1  0  0  4  1  1 23   3.6391     331
  4  1  1 21  1 -1  0  2  2  1 25   3.6393     330
  2  2  1 25 -1  1  0  4  1  1 21   3.6393     331
  2  1  1 25 -1  1  0  4  1  1 21   3.6393     329
  4  1  1 21  1 -1  0  2  1  1 25   3.6393     329
  4  2  1 25  1 -1  0  2  1  1 21   3.6393     331
  1  1  1 21  1  0  1  3  1  1 25   3.6393     329
  3  1  1 25 -1  0 -1  1  1  1 21   3.6393     329
  1  1  1 21  1  0  1  3  2  1 25   3.6393     330
  2  1  1 21 -1  1  0  4  2  1 25   3.6393     330
  3  2  1 25 -1  0 -1  1  1  1 21   3.6393     331
  1  1  1 25  1  0  1  3  1  1 21   3.6394     329
  2  1  1 21 -1  1  0  4  1  1 25   3.6394     329
  3  1  1 21 -1  0 -1  1  1  1 25   3.6394     329
  4  1  1 25  1 -1  0  2  1  1 21   3.6394     329
  3  1  1 21 -1  0 -1  1  2  1 25   3.6394     330
  1  2  1 25  1  0  1  3  1  1 21   3.6394     331
  2  1  1 11 -1  1  0  4  1  1 23   3.6422     329
  4  1  1 23  1 -1  0  2  1  1 11   3.6422     329
  4  1  1 23  1 -1  0  2  2  1 11   3.6422     330
  2  2  1 11 -1  1  0  4  1  1 23   3.6422     331
  2  1  1 11 -1  1  0  4  2  1 23   3.6422     330
  4  2  1 23  1 -1  0  2  1  1 11   3.6422     331
  1  1  1 11  1  0  1  3  2  1 23   3.6422     330
  3  2  1 23 -1  0 -1  1  1  1 11   3.6422     331
  1  2  1 11  1  0  1  3  2  1 23   3.6422     332
  2  2  1 11 -1  1  0  4  2  1 23   3.6422     332
  2  2  1 23 -1  1  0  4  2  1 11   3.6422     332
  3  2  1 23 -1  0 -1  1  2  1 11   3.6422     332
  4  2  1 11  1 -1  0  2  2  1 23   3.6422     332
  4  2  1 23  1 -1  0  2  2  1 11   3.6422     332
  1  1  1 11  1  0  1  3  1  1 23   3.6422     329
  1  1  1 23  1  0  1  3  1  1 11   3.6422     329
  3  1  1 11 -1  0 -1  1  1  1 23   3.6422     329
  3  1  1 23 -1  0 -1  1  1  1 11   3.6422     329
  1  1  1 23  1  0  1  3  2  1 11   3.6422     330
  2  1  1 23 -1  1  0  4  2  1 11   3.6422     330
  3  1  1 11 -1  0 -1  1  2  1 23   3.6422     330
  3  1  1 23 -1  0 -1  1  2  1 11   3.6422     330
  4  1  1 11  1 -1  0  2  2  1 23   3.6422     330
  1  2  1 11  1  0  1  3  1  1 23   3.6422     331
  1  2  1 23  1  0  1  3  1  1 11   3.6422     331
  2  2  1 23 -1  1  0  4  1  1 11   3.6422     331
  3  2  1 11 -1  0 -1  1  1  1 23   3.6422     331
  4  2  1 11  1 -1  0  2  1  1 23   3.6422     331
  1  2  1 23  1  0  1  3  2  1 11   3.6422     332
  3  2  1 11 -1  0 -1  1  2  1 23   3.6422     332
  2  1  1 23 -1  1  0  4  1  1 11   3.6422     333
  4  1  1 11  1 -1  0  2  1  1 23   3.6422     333
  4  1  1 16  1  0  0  3  2  1 26   3.6532     338
  3  2  1 26 -1  0  0  4  1  1 16   3.6532     339
  1  1  1 16  1 -1  0  2  2  1 26   3.6532     338
  2  2  1 26 -1  1  0  1  1  1 16   3.6532     339
  1  2  1 16  1 -1  0  2  2  1 26   3.6532     340
  2  2  1 26 -1  1  0  1  2  1 16   3.6532     340
  3  2  1 16 -1  1  0  4  2  1 26   3.6532     340
  4  2  1 26  1 -1  0  3  2  1 16   3.6532     340
  2  1  1 16 -1  0  0  1  2  1 26   3.6532     338
  3  1  1 16 -1  1  0  4  2  1 26   3.6532     338
  1  2  1 26  1  0  0  2  1  1 16   3.6532     339
  4  2  1 26  1 -1  0  3  1  1 16   3.6532     339
  1  2  1 26  1  0  0  2  2  1 16   3.6532     340
  2  2  1 16 -1  0  0  1  2  1 26   3.6532     340
  3  2  1 26 -1  0  0  4  2  1 16   3.6532     340
  4  2  1 16  1  0  0  3  2  1 26   3.6532     340
  1  1  1  3  1  0  1  3  2  1  3   3.6561     338
  2  1  1  3 -1  1  0  4  2  1  3   3.6561     338
  4  1  1  3  1 -1  0  2  2  1  3   3.6561     338
  2  2  1  3 -1  1  0  4  1  1  3   3.6561     339
  3  2  1  3 -1  0 -1  1  1  1  3   3.6561     339
  4  2  1  3  1 -1  0  2  1  1  3   3.6561     339
  1  2  1  3  1  0  1  3  2  1  3   3.6561     340
  2  2  1  3 -1  1  0  4  2  1  3   3.6561     340
  3  2  1  3 -1  0 -1  1  2  1  3   3.6561     340
  4  2  1  3  1 -1  0  2  2  1  3   3.6561     340
  1  1  1  3  1  0  1  3  1  1  3   3.6561     337
  2  1  1  3 -1  1  0  4  1  1  3   3.6561     337
  3  1  1  3 -1  0 -1  1  1  1  3   3.6561     337
  4  1  1  3  1 -1  0  2  1  1  3   3.6561     337
  3  1  1  3 -1  0 -1  1  2  1  3   3.6561     338
  1  2  1  3  1  0  1  3  1  1  3   3.6561     339
  1  1  1  5  1  0  1  4  1  1 16   3.6634     341
  1  1  1 16 -1  0  0  4  1  1  5   3.6634     341
  2  1  1  5 -1  0  0  3  1  1 16   3.6634     341
  3  1  1 16  1  0  0  2  1  1  5   3.6634     341
  4  1  1  5  1  0  0  1  1  1 16   3.6634     341
  4  1  1 16 -1  0 -1  1  1  1  5   3.6634     341
  1  1  1  5  1  0  1  4  2  1 16   3.6634     342
  1  1  1 16 -1  0  0  4  2  1  5   3.6634     342
  2  1  1  5 -1  0  0  3  2  1 16   3.6634     342
  3  1  1 16  1  0  0  2  2  1  5   3.6634     342
  4  1  1  5  1  0  0  1  2  1 16   3.6634     342
  4  1  1 16 -1  0 -1  1  2  1  5   3.6634     342
  1  2  1  5  1  0  1  4  1  1 16   3.6634     343
  1  2  1 16 -1  0  0  4  1  1  5   3.6634     343
  2  2  1  5 -1  0  0  3  1  1 16   3.6634     343
  3  2  1 16  1  0  0  2  1  1  5   3.6634     343
  4  2  1  5  1  0  0  1  1  1 16   3.6634     343
  4  2  1 16 -1  0 -1  1  1  1  5   3.6634     343
  1  2  1  5  1  0  1  4  2  1 16   3.6634     344
  1  2  1 16 -1  0  0  4  2  1  5   3.6634     344
  2  2  1  5 -1  0  0  3  2  1 16   3.6634     344
  3  2  1 16  1  0  0  2  2  1  5   3.6634     344
  4  2  1  5  1  0  0  1  2  1 16   3.6634     344
  2  1  1 16  1  0  1  3  2  1  5   3.6634     342
  3  2  1  5 -1  0 -1  2  1  1 16   3.6634     343
  2  2  1 16  1  0  1  3  2  1  5   3.6634     344
  3  2  1  5 -1  0 -1  2  2  1 16   3.6634     344
  4  2  1 16 -1  0 -1  1  2  1  5   3.6634     344
  2  1  1 16  1  0  1  3  1  1  5   3.6634     341
  3  1  1  5 -1  0 -1  2  1  1 16   3.6634     341
  3  1  1  5 -1  0 -1  2  2  1 16   3.6634     342
  2  2  1 16  1  0  1  3  1  1  5   3.6634     343
  2  1  1 16  1  0  0  2  1  1 21   3.6706     345
  2  1  1 21 -1  0  0  2  1  1 16   3.6706     345
  2  1  1 21 -1  0  0  2  2  1 16   3.6706     346
  2  2  1 16  1  0  0  2  1  1 21   3.6706     347
  1  1  1 16 -1  0  0  1  1  1 21   3.6706     345
  1  1  1 21  1  0  0  1  1  1 16   3.6706     345
  3  1  1 16  1  0  0  3  1  1 21   3.6706     345
  3  1  1 21 -1  0  0  3  1  1 16   3.6706     345
  1  1  1 21  1  0  0  1  2  1 16   3.6706     346
  4  1  1 21  1  0  0  4  2  1 16   3.6706     346
  1  2  1 16 -1  0  0  1  1  1 21   3.6706     347
  4  2  1 16 -1  0  0  4  1  1 21   3.6706     347
  3  1  1 21 -1  0  0  3  2  1 16   3.6706     346
  3  2  1 16  1  0  0  3  1  1 21   3.6706     347
  4  1  1 16 -1  0  0  4  1  1 21   3.6706     345
  4  1  1 21  1  0  0  4  1  1 16   3.6706     345
  2  1  1 14 -1  1  0  4  1  1  5   3.6734     345
  4  1  1  5  1 -1  0  2  1  1 14   3.6734     345
  2  1  1 14 -1  1  0  4  2  1  5   3.6734     346
  4  1  1  5  1 -1  0  2  2  1 14   3.6734     346
  2  2  1 14 -1  1  0  4  1  1  5   3.6734     347
  4  2  1  5  1 -1  0  2  1  1 14   3.6734     347
  2  2  1 14 -1  1  0  4  2  1  5   3.6734     348
  4  2  1  5  1 -1  0  2  2  1 14   3.6734     348
  1  1  1 14  1  0  1  3  2  1  5   3.6734     346
  3  2  1  5 -1  0 -1  1  1  1 14   3.6734     347
  1  2  1 14  1  0  1  3  2  1  5   3.6734     348
  2  2  1  5 -1  1  0  4  2  1 14   3.6734     348
  3  2  1  5 -1  0 -1  1  2  1 14   3.6734     348
  4  2  1 14  1 -1  0  2  2  1  5   3.6734     348
  1  1  1  5  1  0  1  3  2  1 14   3.6735     346
  3  1  1  5 -1  0 -1  1  2  1 14   3.6735     346
  4  1  1 14  1 -1  0  2  2  1  5   3.6735     346
  1  2  1 14  1  0  1  3  1  1  5   3.6735     347
  2  2  1  5 -1  1  0  4  1  1 14   3.6735     347
  3  2  1 14 -1  0 -1  1  1  1  5   3.6735     347
  1  2  1  5  1  0  1  3  2  1 14   3.6735     348
  3  2  1 14 -1  0 -1  1  2  1  5   3.6735     348
  1  1  1  5  1  0  1  3  1  1 14   3.6735     345
  1  1  1 14  1  0  1  3  1  1  5   3.6735     345
  2  1  1  5 -1  1  0  4  1  1 14   3.6735     345
  3  1  1  5 -1  0 -1  1  1  1 14   3.6735     345
  3  1  1 14 -1  0 -1  1  1  1  5   3.6735     345
  4  1  1 14  1 -1  0  2  1  1  5   3.6735     345
  2  1  1  5 -1  1  0  4  2  1 14   3.6735     346
  3  1  1 14 -1  0 -1  1  2  1  5   3.6735     346
  1  2  1  5  1  0  1  3  1  1 14   3.6735     347
  4  2  1 14  1 -1  0  2  1  1  5   3.6735     347
  2  2  1 21 -1  1  0  4  2  1  7   3.6790     352
  4  2  1  7  1 -1  0  2  2  1 21   3.6790     352
  1  1  1  7  1  0  1  3  2  1 21   3.6790     350
  4  1  1  7  1 -1  0  2  2  1 21   3.6790     350
  2  2  1 21 -1  1  0  4  1  1  7   3.6790     351
  3  2  1 21 -1  0 -1  1  1  1  7   3.6790     351
  1  2  1  7  1  0  1  3  2  1 21   3.6790     352
  2  2  1  7 -1  1  0  4  2  1 21   3.6790     352
  3  2  1 21 -1  0 -1  1  2  1  7   3.6790     352
  4  2  1 21  1 -1  0  2  2  1  7   3.6790     352
  2  1  1  7 -1  1  0  4  2  1 21   3.6790     350
  3  1  1  7 -1  0 -1  1  2  1 21   3.6790     350
  1  2  1 21  1  0  1  3  1  1  7   3.6790     351
  4  2  1 21  1 -1  0  2  1  1  7   3.6790     351
  1  2  1 21  1  0  1  3  2  1  7   3.6790     352
  3  2  1  7 -1  0 -1  1  2  1 21   3.6790     352
  1  1  1  8  1 -1  0  2  1  1 14   3.6815     349
  1  1  1 14  1  0  0  2  1  1  8   3.6815     349
  2  1  1  8 -1  0  0  1  1  1 14   3.6815     349
  2  1  1 14 -1  1  0  1  1  1  8   3.6815     349
  3  1  1  8 -1  1  0  4  1  1 14   3.6815     349
  4  1  1 14  1 -1  0  3  1  1  8   3.6815     349
  2  1  1  8 -1  0  0  1  2  1 14   3.6815     350
  2  1  1 14 -1  1  0  1  2  1  8   3.6815     350
  3  1  1  8 -1  1  0  4  2  1 14   3.6815     350
  4  1  1 14  1 -1  0  3  2  1  8   3.6815     350
  1  2  1  8  1 -1  0  2  1  1 14   3.6815     351
  1  2  1 14  1  0  0  2  1  1  8   3.6815     351
  3  2  1  8 -1  1  0  4  1  1 14   3.6815     351
  4  2  1 14  1 -1  0  3  1  1  8   3.6815     351
  3  1  1 14 -1  0  0  4  1  1  8   3.6815     349
  4  1  1  8  1  0  0  3  1  1 14   3.6815     349
  1  1  1  8  1 -1  0  2  2  1 14   3.6815     350
  1  1  1 14  1  0  0  2  2  1  8   3.6815     350
  3  1  1 14 -1  0  0  4  2  1  8   3.6815     350
  4  1  1  8  1  0  0  3  2  1 14   3.6815     350
  2  2  1  8 -1  0  0  1  1  1 14   3.6815     351
  2  2  1 14 -1  1  0  1  1  1  8   3.6815     351
  3  2  1 14 -1  0  0  4  1  1  8   3.6815     351
  4  2  1  8  1  0  0  3  1  1 14   3.6815     351
  1  2  1  8  1 -1  0  2  2  1 14   3.6815     352
  1  2  1 14  1  0  0  2  2  1  8   3.6815     352
  2  2  1  8 -1  0  0  1  2  1 14   3.6815     352
  2  2  1 14 -1  1  0  1  2  1  8   3.6815     352
  3  2  1  8 -1  1  0  4  2  1 14   3.6815     352
  4  2  1 14  1 -1  0  3  2  1  8   3.6815     352
  3  2  1 14 -1  0  0  4  2  1  8   3.6815     352
  4  2  1  8  1  0  0  3  2  1 14   3.6815     352
  2  1  1 15 -1  1  0  4  1  1  6   3.6845     353
  4  1  1  6  1 -1  0  2  1  1 15   3.6845     353
  2  1  1 15 -1  1  0  4  2  1  6   3.6845     354
  4  1  1  6  1 -1  0  2  2  1 15   3.6845     354
  4  1  1 15  1 -1  0  2  2  1  6   3.6845     354
  2  2  1  6 -1  1  0  4  1  1 15   3.6845     355
  2  2  1 15 -1  1  0  4  1  1  6   3.6845     355
  4  2  1  6  1 -1  0  2  1  1 15   3.6845     355
  2  2  1  6 -1  1  0  4  2  1 15   3.6845     356
  2  2  1 15 -1  1  0  4  2  1  6   3.6845     356
  4  2  1  6  1 -1  0  2  2  1 15   3.6845     356
  4  2  1 15  1 -1  0  2  2  1  6   3.6845     356
  1  1  1  6  1  0  1  3  1  1 15   3.6845     353
  1  1  1 15  1  0  1  3  1  1  6   3.6845     353
  2  1  1  6 -1  1  0  4  1  1 15   3.6845     353
  3  1  1  6 -1  0 -1  1  1  1 15   3.6845     353
  3  1  1 15 -1  0 -1  1  1  1  6   3.6845     353
  4  1  1 15  1 -1  0  2  1  1  6   3.6845     353
  1  1  1  6  1  0  1  3  2  1 15   3.6845     354
  1  1  1 15  1  0  1  3  2  1  6   3.6845     354
  2  1  1  6 -1  1  0  4  2  1 15   3.6845     354
  3  1  1  6 -1  0 -1  1  2  1 15   3.6845     354
  3  1  1 15 -1  0 -1  1  2  1  6   3.6845     354
  1  2  1  6  1  0  1  3  1  1 15   3.6845     355
  1  2  1 15  1  0  1  3  1  1  6   3.6845     355
  3  2  1  6 -1  0 -1  1  1  1 15   3.6845     355
  3  2  1 15 -1  0 -1  1  1  1  6   3.6845     355
  4  2  1 15  1 -1  0  2  1  1  6   3.6845     355
  1  2  1  6  1  0  1  3  2  1 15   3.6845     356
  1  2  1 15  1  0  1  3  2  1  6   3.6845     356
  3  2  1  6 -1  0 -1  1  2  1 15   3.6845     356
  3  2  1 15 -1  0 -1  1  2  1  6   3.6845     356
  2  1  1 22 -1  0  0  2  2  1 20   3.6847     354
  2  2  1 20  1  0  0  2  1  1 22   3.6847     355
  4  2  1 20 -1  0  0  4  2  1 22   3.6847     356
  4  2  1 22  1  0  0  4  2  1 20   3.6847     356
  1  1  1 22  1  0  0  1  2  1 20   3.6848     354
  4  1  1 22  1  0  0  4  2  1 20   3.6848     354
  4  2  1 20 -1  0  0  4  1  1 22   3.6848     355
  2  2  1 20  1  0  0  2  2  1 22   3.6848     356
  2  2  1 22 -1  0  0  2  2  1 20   3.6848     356
  3  1  1 22 -1  0  0  3  2  1 20   3.6848     354
  1  2  1 20 -1  0  0  1  1  1 22   3.6848     355
  3  2  1 20  1  0  0  3  1  1 22   3.6848     355
  1  2  1 20 -1  0  0  1  2  1 22   3.6848     356
  1  2  1 22  1  0  0  1  2  1 20   3.6848     356
  3  2  1 20  1  0  0  3  2  1 22   3.6848     356
  3  2  1 22 -1  0  0  3  2  1 20   3.6848     356
  1  1  1 11  1 -1  0  2  2  1 26   3.6918     358
  4  1  1 11  1  0  0  3  2  1 26   3.6918     358
  2  2  1 26 -1  1  0  1  1  1 11   3.6918     359
  3  2  1 26 -1  0  0  4  1  1 11   3.6918     359
  1  2  1 11  1 -1  0  2  2  1 26   3.6918     360
  2  2  1 26 -1  1  0  1  2  1 11   3.6918     360
  2  1  1 11 -1  0  0  1  2  1 26   3.6918     358
  3  1  1 11 -1  1  0  4  2  1 26   3.6918     358
  1  2  1 26  1  0  0  2  1  1 11   3.6918     359
  4  2  1 26  1 -1  0  3  1  1 11   3.6918     359
  1  2  1 26  1  0  0  2  2  1 11   3.6918     360
  2  2  1 11 -1  0  0  1  2  1 26   3.6918     360
  3  2  1 11 -1  1  0  4  2  1 26   3.6918     360
  3  2  1 26 -1  0  0  4  2  1 11   3.6918     360
  4  2  1 11  1  0  0  3  2  1 26   3.6918     360
  4  2  1 26  1 -1  0  3  2  1 11   3.6918     360
  4  1  1  4  1 -1  0  2  2  1 15   3.6946     358
  2  2  1 15 -1  1  0  4  1  1  4   3.6946     359
  2  2  1 15 -1  1  0  4  2  1  4   3.6946     360
  4  2  1  4  1 -1  0  2  2  1 15   3.6946     360
  2  1  1 15 -1  1  0  4  1  1  4   3.6946     357
  4  1  1  4  1 -1  0  2  1  1 15   3.6946     357
  1  1  1 15  1  0  1  3  2  1  4   3.6946     358
  2  1  1 15 -1  1  0  4  2  1  4   3.6946     358
  3  2  1  4 -1  0 -1  1  1  1 15   3.6946     359
  4  2  1  4  1 -1  0  2  1  1 15   3.6946     359
  1  2  1 15  1  0  1  3  2  1  4   3.6946     360
  2  2  1  4 -1  1  0  4  2  1 15   3.6946     360
  3  2  1  4 -1  0 -1  1  2  1 15   3.6946     360
  4  2  1 15  1 -1  0  2  2  1  4   3.6946     360
  1  1  1  4  1  0  1  3  2  1 15   3.6946     358
  4  1  1 15  1 -1  0  2  2  1  4   3.6946     358
  2  2  1  4 -1  1  0  4  1  1 15   3.6946     359
  3  2  1 15 -1  0 -1  1  1  1  4   3.6946     359
  1  2  1  4  1  0  1  3  2  1 15   3.6946     360
  3  2  1 15 -1  0 -1  1  2  1  4   3.6946     360
  1  1  1  4  1  0  1  3  1  1 15   3.6947     357
  1  1  1 15  1  0  1  3  1  1  4   3.6947     357
  2  1  1  4 -1  1  0  4  1  1 15   3.6947     357
  3  1  1  4 -1  0 -1  1  1  1 15   3.6947     357
  3  1  1 15 -1  0 -1  1  1  1  4   3.6947     357
  4  1  1 15  1 -1  0  2  1  1  4   3.6947     357
  2  1  1  4 -1  1  0  4  2  1 15   3.6947     358
  3  1  1  4 -1  0 -1  1  2  1 15   3.6947     358
  3  1  1 15 -1  0 -1  1  2  1  4   3.6947     358
  1  2  1  4  1  0  1  3  1  1 15   3.6947     359
  1  2  1 15  1  0  1  3  1  1  4   3.6947     359
  4  2  1 15  1 -1  0  2  1  1  4   3.6947     359
  4  2  1 16 -1  0  0  4  2  1 21   3.6950     360
  4  2  1 21  1  0  0  4  2  1 16   3.6950     360
  1  1  1 16 -1  0  0  1  2  1 21   3.6950     358
  2  1  1 16  1  0  0  2  2  1 21   3.6950     358
  1  2  1 21  1  0  0  1  1  1 16   3.6950     359
  2  2  1 21 -1  0  0  2  1  1 16   3.6950     359
  1  2  1 16 -1  0  0  1  2  1 21   3.6950     360
  1  2  1 21  1  0  0  1  2  1 16   3.6950     360
  2  2  1 16  1  0  0  2  2  1 21   3.6950     360
  2  2  1 21 -1  0  0  2  2  1 16   3.6950     360
  3  1  1 16  1  0  0  3  2  1 21   3.6950     358
  4  1  1 16 -1  0  0  4  2  1 21   3.6950     358
  3  2  1 21 -1  0  0  3  1  1 16   3.6950     359
  4  2  1 21  1  0  0  4  1  1 16   3.6950     359
  3  2  1 16  1  0  0  3  2  1 21   3.6950     360
  3  2  1 21 -1  0  0  3  2  1 16   3.6950     360
  2  1  1 10 -1  1  0  4  1  1  5   3.6959     357
  4  1  1  5  1 -1  0  2  1  1 10   3.6959     357
  4  1  1  5  1 -1  0  2  2  1 10   3.6959     358
  2  2  1 10 -1  1  0  4  1  1  5   3.6959     359
  1  1  1 10  1  0  1  3  2  1  5   3.6959     358
  2  1  1 10 -1  1  0  4  2  1  5   3.6959     358
  3  2  1  5 -1  0 -1  1  1  1 10   3.6959     359
  4  2  1  5  1 -1  0  2  1  1 10   3.6959     359
  1  2  1 10  1  0  1  3  2  1  5   3.6959     360
  2  2  1  5 -1  1  0  4  2  1 10   3.6959     360
  2  2  1 10 -1  1  0  4  2  1  5   3.6959     360
  3  2  1  5 -1  0 -1  1  2  1 10   3.6959     360
  4  2  1  5  1 -1  0  2  2  1 10   3.6959     360
  4  2  1 10  1 -1  0  2  2  1  5   3.6959     360
  1  1  1  5  1  0  1  3  1  1 10   3.6959     357
  1  1  1 10  1  0  1  3  1  1  5   3.6959     357
  3  1  1  5 -1  0 -1  1  1  1 10   3.6959     357
  3  1  1 10 -1  0 -1  1  1  1  5   3.6959     357
  1  1  1  5  1  0  1  3  2  1 10   3.6959     358
  2  1  1  5 -1  1  0  4  2  1 10   3.6959     358
  3  1  1  5 -1  0 -1  1  2  1 10   3.6959     358
  3  1  1 10 -1  0 -1  1  2  1  5   3.6959     358
  4  1  1 10  1 -1  0  2  2  1  5   3.6959     358
  1  2  1  5  1  0  1  3  1  1 10   3.6959     359
  1  2  1 10  1  0  1  3  1  1  5   3.6959     359
  2  2  1  5 -1  1  0  4  1  1 10   3.6959     359
  3  2  1 10 -1  0 -1  1  1  1  5   3.6959     359
  4  2  1 10  1 -1  0  2  1  1  5   3.6959     359
  1  2  1  5  1  0  1  3  2  1 10   3.6959     360
  3  2  1 10 -1  0 -1  1  2  1  5   3.6959     360
  2  1  1  5 -1  1  0  4  1  1 10   3.6959     357
  4  1  1 10  1 -1  0  2  1  1  5   3.6959     357
  2  2  1 27 -1  1  0  1  1  1  9   3.6983     363
  2  2  1 27 -1  1  0  1  2  1  9   3.6983     364
  1  1  1  9  1 -1  0  2  2  1 27   3.6983     362
  2  1  1  9 -1  0  0  1  2  1 27   3.6983     362
  3  1  1  9 -1  1  0  4  2  1 27   3.6983     362
  4  1  1  9  1  0  0  3  2  1 27   3.6983     362
  1  2  1 27  1  0  0  2  1  1  9   3.6983     363
  3  2  1 27 -1  0  0  4  1  1  9   3.6983     363
  4  2  1 27  1 -1  0  3  1  1  9   3.6983     363
  1  2  1  9  1 -1  0  2  2  1 27   3.6983     364
  1  2  1 27  1  0  0  2  2  1  9   3.6983     364
  2  2  1  9 -1  0  0  1  2  1 27   3.6983     364
  3  2  1  9 -1  1  0  4  2  1 27   3.6983     364
  3  2  1 27 -1  0  0  4  2  1  9   3.6983     364
  4  2  1  9  1  0  0  3  2  1 27   3.6983     364
  4  2  1 27  1 -1  0  3  2  1  9   3.6983     364
  3  1  1 17  0  0  0  4  1  1 28   3.6987     361
  4  1  1 28  0  0  0  3  1  1 17   3.6987     361
  3  1  1 28  0  1  0  4  2  1 17   3.6987     362
  4  1  1 28  0  0  0  3  2  1 17   3.6987     362
  3  2  1 17  0  0  0  4  1  1 28   3.6987     363
  4  2  1 17  0 -1  0  3  1  1 28   3.6987     363
  1  1  1 28  0 -1  0  2  1  1 17   3.6987     361
  2  1  1 17  0  1  0  1  1  1 28   3.6987     361
  3  1  1 28  0  1  0  4  1  1 17   3.6987     361
  4  1  1 17  0 -1  0  3  1  1 28   3.6987     361
  1  1  1 17  0  0  0  2  1  1 28   3.6987     361
  2  1  1 28  0  0  0  1  1  1 17   3.6987     361
  1  1  1 28  0 -1  0  2  2  1 17   3.6987     362
  2  1  1 28  0  0  0  1  2  1 17   3.6987     362
  1  2  1 17  0  0  0  2  1  1 28   3.6987     363
  2  2  1 17  0  1  0  1  1  1 28   3.6987     363
  1  1  1 27  1 -1  0  2  1  1 21   3.7021     361
  2  1  1 21 -1  1  0  1  1  1 27   3.7021     361
  3  1  1 21 -1  0  0  4  1  1 27   3.7021     361
  4  1  1 27  1  0  0  3  1  1 21   3.7021     361
  1  1  1 21  1  0  0  2  1  1 27   3.7021     361
  2  1  1 27 -1  0  0  1  1  1 21   3.7021     361
  3  1  1 27 -1  1  0  4  1  1 21   3.7021     361
  4  1  1 21  1 -1  0  3  1  1 27   3.7021     361
  4  1  1  3  1 -1  0  2  2  1  2   3.7022     362
  2  2  1  2 -1  1  0  4  1  1  3   3.7022     363
  2  2  1  2 -1  1  0  4  2  1  3   3.7022     364
  2  2  1  3 -1  1  0  4  2  1  2   3.7022     364
  4  2  1  2  1 -1  0  2  2  1  3   3.7022     364
  4  2  1  3  1 -1  0  2  2  1  2   3.7022     364
  2  1  1  2 -1  1  0  4  1  1  3   3.7022     361
  4  1  1  3  1 -1  0  2  1  1  2   3.7022     361
  1  1  1  2  1  0  1  3  2  1  3   3.7022     362
  1  1  1  3  1  0  1  3  2  1  2   3.7022     362
  2  1  1  2 -1  1  0  4  2  1  3   3.7022     362
  2  1  1  3 -1  1  0  4  2  1  2   3.7022     362
  4  1  1  2  1 -1  0  2  2  1  3   3.7022     362
  2  2  1  3 -1  1  0  4  1  1  2   3.7022     363
  3  2  1  2 -1  0 -1  1  1  1  3   3.7022     363
  3  2  1  3 -1  0 -1  1  1  1  2   3.7022     363
  4  2  1  2  1 -1  0  2  1  1  3   3.7022     363
  4  2  1  3  1 -1  0  2  1  1  2   3.7022     363
  1  2  1  2  1  0  1  3  2  1  3   3.7022     364
  1  2  1  3  1  0  1  3  2  1  2   3.7022     364
  3  2  1  2 -1  0 -1  1  2  1  3   3.7022     364
  3  2  1  3 -1  0 -1  1  2  1  2   3.7022     364
  1  1  1  2  1  0  1  3  1  1  3   3.7022     361
  2  1  1  3 -1  1  0  4  1  1  2   3.7022     361
  3  1  1  3 -1  0 -1  1  1  1  2   3.7022     361
  4  1  1  2  1 -1  0  2  1  1  3   3.7022     361
  3  1  1  3 -1  0 -1  1  2  1  2   3.7022     362
  1  2  1  2  1  0  1  3  1  1  3   3.7022     363
  1  1  1  3  1  0  1  3  1  1  2   3.7022     361
  3  1  1  2 -1  0 -1  1  1  1  3   3.7022     361
  3  1  1  2 -1  0 -1  1  2  1  3   3.7022     362
  1  2  1  3  1  0  1  3  1  1  2   3.7022     363
  1  1  1  7  1 -1  1  3  2  1 25   3.7044     366
  1  1  1 25  1 -1  1  3  2  1  7   3.7044     366
  3  2  1 25 -1  1 -1  1  1  1  7   3.7044     367
  1  2  1  7  1 -1  1  3  2  1 25   3.7044     368
  3  2  1 25 -1  1 -1  1  2  1  7   3.7044     368
  1  1  1  7  1 -1  1  3  1  1 25   3.7044     365
  1  1  1 25  1 -1  1  3  1  1  7   3.7044     365
  2  1  1  7 -1  0  0  4  1  1 25   3.7044     365
  3  1  1  7 -1  1 -1  1  1  1 25   3.7044     365
  3  1  1 25 -1  1 -1  1  1  1  7   3.7044     365
  4  1  1 25  1  0  0  2  1  1  7   3.7044     365
  3  1  1  7 -1  1 -1  1  2  1 25   3.7044     366
  3  1  1 25 -1  1 -1  1  2  1  7   3.7044     366
  1  2  1  7  1 -1  1  3  1  1 25   3.7044     367
  1  2  1 25  1 -1  1  3  1  1  7   3.7044     367
  3  2  1  7 -1  1 -1  1  1  1 25   3.7044     367
  1  2  1 25  1 -1  1  3  2  1  7   3.7044     368
  3  2  1  7 -1  1 -1  1  2  1 25   3.7044     368
  2  1  1 25 -1  0  0  4  1  1  7   3.7044     365
  4  1  1  7  1  0  0  2  1  1 25   3.7044     365
  2  1  1  7 -1  0  0  4  2  1 25   3.7044     366
  2  1  1 25 -1  0  0  4  2  1  7   3.7044     366
  4  1  1 25  1  0  0  2  2  1  7   3.7044     366
  2  2  1  7 -1  0  0  4  1  1 25   3.7044     367
  4  2  1  7  1  0  0  2  1  1 25   3.7044     367
  4  2  1 25  1  0  0  2  1  1  7   3.7044     367
  4  1  1  7  1  0  0  2  2  1 25   3.7044     366
  2  2  1 25 -1  0  0  4  1  1  7   3.7044     367
  2  2  1  7 -1  0  0  4  2  1 25   3.7044     368
  2  2  1 25 -1  0  0  4  2  1  7   3.7044     368
  4  2  1  7  1  0  0  2  2  1 25   3.7044     368
  4  2  1 25  1  0  0  2  2  1  7   3.7044     368
  1  1  1 27  1 -1  0  2  2  1 28   3.7056     366
  2  2  1 28 -1  1  0  1  1  1 27   3.7056     367
  3  1  1 27 -1  1  0  4  2  1 28   3.7057     366
  4  2  1 28  1 -1  0  3  1  1 27   3.7057     367
  2  1  1 27 -1  0  0  1  2  1 28   3.7057     366
  4  1  1 27  1  0  0  3  2  1 28   3.7057     366
  1  2  1 28  1  0  0  2  1  1 27   3.7057     367
  3  2  1 28 -1  0  0  4  1  1 27   3.7057     367
  1  1  1  9  1  0  1  3  2  1 28   3.7075     366
  2  1  1  9 -1  1  0  4  2  1 28   3.7075     366
  3  2  1 28 -1  0 -1  1  1  1  9   3.7075     367
  4  2  1 28  1 -1  0  2  1  1  9   3.7075     367
  1  2  1  9  1  0  1  3  2  1 28   3.7075     368
  2  2  1  9 -1  1  0  4  2  1 28   3.7075     368
  3  2  1 28 -1  0 -1  1  2  1  9   3.7075     368
  4  2  1 28  1 -1  0  2  2  1  9   3.7075     368
  2  2  1 28 -1  1  0  4  2  1  9   3.7075     368
  4  2  1  9  1 -1  0  2  2  1 28   3.7075     368
  3  1  1  9 -1  0 -1  1  2  1 28   3.7075     366
  4  1  1  9  1 -1  0  2  2  1 28   3.7075     366
  1  2  1 28  1  0  1  3  1  1  9   3.7075     367
  2  2  1 28 -1  1  0  4  1  1  9   3.7075     367
  1  2  1 28  1  0  1  3  2  1  9   3.7075     368
  3  2  1  9 -1  0 -1  1  2  1 28   3.7075     368
  2  1  1 20  1  0  0  2  1  1 22   3.7082     365
  2  1  1 22 -1  0  0  2  1  1 20   3.7082     365
  3  1  1 20  1  0  0  3  1  1 22   3.7082     365
  3  1  1 22 -1  0  0  3  1  1 20   3.7082     365
  2  1  1 20  1  0  0  2  2  1 22   3.7082     366
  2  2  1 22 -1  0  0  2  1  1 20   3.7082     367
  1  1  1 20 -1  0  0  1  1  1 22   3.7083     365
  1  1  1 22  1  0  0  1  1  1 20   3.7083     365
  1  1  1 20 -1  0  0  1  2  1 22   3.7083     366
  3  1  1 20  1  0  0  3  2  1 22   3.7083     366
  4  1  1 20 -1  0  0  4  2  1 22   3.7083     366
  1  2  1 22  1  0  0  1  1  1 20   3.7083     367
  3  2  1 22 -1  0  0  3  1  1 20   3.7083     367
  4  2  1 22  1  0  0  4  1  1 20   3.7083     367
  4  1  1 20 -1  0  0  4  1  1 22   3.7083     365
  4  1  1 22  1  0  0  4  1  1 20   3.7083     365
  1  1  1 16  0 -1  0  2  1  1 12   3.7098     369
  2  1  1 12  0  1  0  1  1  1 16   3.7098     369
  3  1  1 12  0  0  0  4  1  1 16   3.7098     369
  4  1  1 16  0  0  0  3  1  1 12   3.7098     369
  2  1  1 12  0  1  0  1  2  1 16   3.7098     370
  3  1  1 16  0  1  0  4  2  1 12   3.7098     370
  1  2  1 16  0 -1  0  2  1  1 12   3.7098     371
  4  2  1 12  0 -1  0  3  1  1 16   3.7098     371
  3  2  1 16  0  1  0  4  2  1 12   3.7098     372
  4  2  1 12  0 -1  0  3  2  1 16   3.7098     372
  1  1  1 12  0  0  0  2  1  1 16   3.7098     369
  2  1  1 16  0  0  0  1  1  1 12   3.7098     369
  1  1  1 12  0  0  0  2  2  1 16   3.7098     370
  1  1  1 16  0 -1  0  2  2  1 12   3.7098     370
  2  1  1 16  0  0  0  1  2  1 12   3.7098     370
  3  1  1 12  0  0  0  4  2  1 16   3.7098     370
  4  1  1 12  0 -1  0  3  2  1 16   3.7098     370
  4  1  1 16  0  0  0  3  2  1 12   3.7098     370
  1  2  1 12  0  0  0  2  1  1 16   3.7098     371
  2  2  1 12  0  1  0  1  1  1 16   3.7098     371
  2  2  1 16  0  0  0  1  1  1 12   3.7098     371
  3  2  1 12  0  0  0  4  1  1 16   3.7098     371
  3  2  1 16  0  1  0  4  1  1 12   3.7098     371
  4  2  1 16  0  0  0  3  1  1 12   3.7098     371
  1  2  1 12  0  0  0  2  2  1 16   3.7098     372
  1  2  1 16  0 -1  0  2  2  1 12   3.7098     372
  2  2  1 12  0  1  0  1  2  1 16   3.7098     372
  2  2  1 16  0  0  0  1  2  1 12   3.7098     372
  3  2  1 12  0  0  0  4  2  1 16   3.7098     372
  4  2  1 16  0  0  0  3  2  1 12   3.7098     372
  3  1  1 16  0  1  0  4  1  1 12   3.7099     369
  4  1  1 12  0 -1  0  3  1  1 16   3.7099     369
  4  1  1  3  1 -1  0  2  2  1  8   3.7160     374
  2  2  1  8 -1  1  0  4  1  1  3   3.7160     375
  2  1  1  8 -1  1  0  4  1  1  3   3.7160     373
  4  1  1  3  1 -1  0  2  1  1  8   3.7160     373
  1  1  1  8  1  0  1  3  2  1  3   3.7160     374
  2  1  1  3 -1  1  0  4  2  1  8   3.7160     374
  2  1  1  8 -1  1  0  4  2  1  3   3.7160     374
  4  1  1  8  1 -1  0  2  2  1  3   3.7160     374
  2  2  1  3 -1  1  0  4  1  1  8   3.7160     375
  3  2  1  3 -1  0 -1  1  1  1  8   3.7160     375
  4  2  1  3  1 -1  0  2  1  1  8   3.7160     375
  4  2  1  8  1 -1  0  2  1  1  3   3.7160     375
  1  2  1  8  1  0  1  3  2  1  3   3.7160     376
  2  2  1  3 -1  1  0  4  2  1  8   3.7160     376
  2  2  1  8 -1  1  0  4  2  1  3   3.7160     376
  3  2  1  3 -1  0 -1  1  2  1  8   3.7160     376
  4  2  1  3  1 -1  0  2  2  1  8   3.7160     376
  4  2  1  8  1 -1  0  2  2  1  3   3.7160     376
  1  1  1  3  1  0  1  3  1  1  8   3.7160     373
  1  1  1  8  1  0  1  3  1  1  3   3.7160     373
  2  1  1  3 -1  1  0  4  1  1  8   3.7160     373
  3  1  1  3 -1  0 -1  1  1  1  8   3.7160     373
  3  1  1  8 -1  0 -1  1  1  1  3   3.7160     373
  4  1  1  8  1 -1  0  2  1  1  3   3.7160     373
  1  1  1  3  1  0  1  3  2  1  8   3.7160     374
  3  1  1  3 -1  0 -1  1  2  1  8   3.7160     374
  3  1  1  8 -1  0 -1  1  2  1  3   3.7160     374
  1  2  1  3  1  0  1  3  1  1  8   3.7160     375
  1  2  1  8  1  0  1  3  1  1  3   3.7160     375
  3  2  1  8 -1  0 -1  1  1  1  3   3.7160     375
  1  2  1  3  1  0  1  3  2  1  8   3.7160     376
  3  2  1  8 -1  0 -1  1  2  1  3   3.7160     376
  4  1  1  2  1 -1  0  2  2  1  7   3.7179     374
  4  1  1  7  1 -1  0  2  2  1  2   3.7179     374
  2  2  1  2 -1  1  0  4  1  1  7   3.7179     375
  2  2  1  7 -1  1  0  4  1  1  2   3.7179     375
  2  2  1  2 -1  1  0  4  2  1  7   3.7179     376
  2  2  1  7 -1  1  0  4  2  1  2   3.7179     376
  4  2  1  2  1 -1  0  2  2  1  7   3.7179     376
  4  2  1  7  1 -1  0  2  2  1  2   3.7179     376
  1  1  1  2  1  0  1  3  1  1  7   3.7179     373
  2  1  1  2 -1  1  0  4  1  1  7   3.7179     373
  2  1  1  7 -1  1  0  4  1  1  2   3.7179     373
  3  1  1  7 -1  0 -1  1  1  1  2   3.7179     373
  4  1  1  2  1 -1  0  2  1  1  7   3.7179     373
  4  1  1  7  1 -1  0  2  1  1  2   3.7179     373
  1  1  1  2  1  0  1  3  2  1  7   3.7179     374
  1  1  1  7  1  0  1  3  2  1  2   3.7179     374
  2  1  1  2 -1  1  0  4  2  1  7   3.7179     374
  2  1  1  7 -1  1  0  4  2  1  2   3.7179     374
  3  1  1  7 -1  0 -1  1  2  1  2   3.7179     374
  1  2  1  2  1  0  1  3  1  1  7   3.7179     375
  3  2  1  2 -1  0 -1  1  1  1  7   3.7179     375
  3  2  1  7 -1  0 -1  1  1  1  2   3.7179     375
  4  2  1  2  1 -1  0  2  1  1  7   3.7179     375
  4  2  1  7  1 -1  0  2  1  1  2   3.7179     375
  1  2  1  2  1  0  1  3  2  1  7   3.7179     376
  1  2  1  7  1  0  1  3  2  1  2   3.7179     376
  3  2  1  2 -1  0 -1  1  2  1  7   3.7179     376
  3  2  1  7 -1  0 -1  1  2  1  2   3.7179     376
  1  1  1  7  1  0  1  3  1  1  2   3.7180     373
  3  1  1  2 -1  0 -1  1  1  1  7   3.7180     373
  3  1  1  2 -1  0 -1  1  2  1  7   3.7180     374
  1  2  1  7  1  0  1  3  1  1  2   3.7180     375
  4  1  1 17  0  0 -1  1  2  1 20   3.7180     374
  1  2  1 20  0  0  1  4  1  1 17   3.7180     375
  3  1  1 17  0  0  0  2  2  1 20   3.7181     374
  2  2  1 20  0  0  0  3  1  1 17   3.7181     375
  2  2  1 20  0  0  0  3  2  1 17   3.7181     376
  3  2  1 17  0  0  0  2  2  1 20   3.7181     376
  1  1  1 17  0  0  0  4  2  1 20   3.7181     374
  4  2  1 20  0  0  0  1  1  1 17   3.7181     375
  1  2  1 17  0  0  0  4  2  1 20   3.7181     376
  1  2  1 20  0  0  1  4  2  1 17   3.7181     376
  4  2  1 17  0  0 -1  1  2  1 20   3.7181     376
  4  2  1 20  0  0  0  1  2  1 17   3.7181     376
  3  2  1 20  0  0 -1  2  1  1 17   3.7181     375
  2  1  1 17  0  0  1  3  2  1 20   3.7181     374
  2  2  1 17  0  0  1  3  2  1 20   3.7181     376
  3  2  1 20  0  0 -1  2  2  1 17   3.7181     376
  4  1  1 21  1 -1  0  2  2  1  7   3.7184     374
  2  2  1  7 -1  1  0  4  1  1 21   3.7184     375
  2  1  1  7 -1  1  0  4  1  1 21   3.7184     373
  4  1  1 21  1 -1  0  2  1  1  7   3.7184     373
  2  1  1 21 -1  1  0  4  2  1  7   3.7184     374
  4  2  1  7  1 -1  0  2  1  1 21   3.7184     375
  1  1  1 21  1  0  1  3  1  1  7   3.7184     373
  2  1  1 21 -1  1  0  4  1  1  7   3.7184     373
  3  1  1  7 -1  0 -1  1  1  1 21   3.7184     373
  4  1  1  7  1 -1  0  2  1  1 21   3.7184     373
  1  1  1 21  1  0  1  3  2  1  7   3.7184     374
  1  2  1  7  1  0  1  3  1  1 21   3.7184     375
  3  2  1  7 -1  0 -1  1  1  1 21   3.7184     375
  1  1  1  7  1  0  1  3  1  1 21   3.7184     373
  3  1  1 21 -1  0 -1  1  1  1  7   3.7184     373
  3  1  1 21 -1  0 -1  1  2  1  7   3.7184     374
  2  2  1 28 -1  1  0  4  2  1  6   3.7207     376
  4  2  1  6  1 -1  0  2  2  1 28   3.7207     376
  1  1  1  6  1  0  1  3  2  1 28   3.7207     374
  4  1  1  6  1 -1  0  2  2  1 28   3.7207     374
  2  2  1 28 -1  1  0  4  1  1  6   3.7207     375
  3  2  1 28 -1  0 -1  1  1  1  6   3.7207     375
  1  2  1  6  1  0  1  3  2  1 28   3.7207     376
  1  2  1 28  1  0  1  3  2  1  6   3.7207     376
  3  2  1  6 -1  0 -1  1  2  1 28   3.7207     376
  3  2  1 28 -1  0 -1  1  2  1  6   3.7207     376
  2  1  1  6 -1  1  0  4  2  1 28   3.7208     374
  3  1  1  6 -1  0 -1  1  2  1 28   3.7208     374
  1  2  1 28  1  0  1  3  1  1  6   3.7208     375
  4  2  1 28  1 -1  0  2  1  1  6   3.7208     375
  2  2  1  6 -1  1  0  4  2  1 28   3.7208     376
  4  2  1 28  1 -1  0  2  2  1  6   3.7208     376
  2  1  1  5 -1  0  0  4  1  1 27   3.7227     377
  4  1  1 27  1  0  0  2  1  1  5   3.7227     377
  1  1  1  5  1 -1  1  3  1  1 27   3.7227     377
  1  1  1 27  1 -1  1  3  1  1  5   3.7227     377
  3  1  1  5 -1  1 -1  1  1  1 27   3.7227     377
  3  1  1 27 -1  1 -1  1  1  1  5   3.7227     377
  1  1  1 27  1 -1  1  3  2  1  5   3.7227     378
  2  1  1 27 -1  0  0  4  2  1  5   3.7227     378
  3  1  1 27 -1  1 -1  1  2  1  5   3.7227     378
  4  1  1 27  1  0  0  2  2  1  5   3.7227     378
  1  2  1  5  1 -1  1  3  1  1 27   3.7227     379
  2  2  1  5 -1  0  0  4  1  1 27   3.7227     379
  3  2  1  5 -1  1 -1  1  1  1 27   3.7227     379
  4  2  1  5  1  0  0  2  1  1 27   3.7227     379
  2  1  1 27 -1  0  0  4  1  1  5   3.7227     377
  4  1  1  5  1  0  0  2  1  1 27   3.7227     377
  4  1  1  4  1 -1  0  2  2  1  9   3.7270     378
  2  2  1  9 -1  1  0  4  1  1  4   3.7270     379
  2  1  1  9 -1  1  0  4  1  1  4   3.7270     377
  4  1  1  4  1 -1  0  2  1  1  9   3.7270     377
  1  1  1  9  1  0  1  3  2  1  4   3.7270     378
  2  1  1  9 -1  1  0  4  2  1  4   3.7270     378
  3  2  1  4 -1  0 -1  1  1  1  9   3.7270     379
  4  2  1  4  1 -1  0  2  1  1  9   3.7270     379
  1  2  1  9  1  0  1  3  2  1  4   3.7270     380
  2  2  1  4 -1  1  0  4  2  1  9   3.7270     380
  2  2  1  9 -1  1  0  4  2  1  4   3.7270     380
  3  2  1  4 -1  0 -1  1  2  1  9   3.7270     380
  4  2  1  4  1 -1  0  2  2  1  9   3.7270     380
  4  2  1  9  1 -1  0  2  2  1  4   3.7270     380
  1  1  1  4  1  0  1  3  1  1  9   3.7270     377
  1  1  1  9  1  0  1  3  1  1  4   3.7270     377
  3  1  1  4 -1  0 -1  1  1  1  9   3.7270     377
  3  1  1  9 -1  0 -1  1  1  1  4   3.7270     377
  1  1  1  4  1  0  1  3  2  1  9   3.7270     378
  2  1  1  4 -1  1  0  4  2  1  9   3.7270     378
  3  1  1  4 -1  0 -1  1  2  1  9   3.7270     378
  3  1  1  9 -1  0 -1  1  2  1  4   3.7270     378
  4  1  1  9  1 -1  0  2  2  1  4   3.7270     378
  1  2  1  4  1  0  1  3  1  1  9   3.7270     379
  1  2  1  9  1  0  1  3  1  1  4   3.7270     379
  2  2  1  4 -1  1  0  4  1  1  9   3.7270     379
  3  2  1  9 -1  0 -1  1  1  1  4   3.7270     379
  4  2  1  9  1 -1  0  2  1  1  4   3.7270     379
  1  2  1  4  1  0  1  3  2  1  9   3.7270     380
  3  2  1  9 -1  0 -1  1  2  1  4   3.7270     380
  2  1  1  4 -1  1  0  4  1  1  9   3.7270     377
  4  1  1  9  1 -1  0  2  1  1  4   3.7270     377
  2  1  1 16  1  0  0  2  2  1 26   3.7292     382
  2  2  1 26 -1  0  0  2  1  1 16   3.7292     383
  2  2  1 16  1  0  0  2  2  1 26   3.7292     384
  2  2  1 26 -1  0  0  2  2  1 16   3.7292     384
  4  2  1 16 -1  0  0  4  2  1 26   3.7292     384
  4  2  1 26  1  0  0  4  2  1 16   3.7292     384
  1  1  1 16 -1  0  0  1  2  1 26   3.7292     382
  1  2  1 26  1  0  0  1  1  1 16   3.7292     383
  1  2  1 16 -1  0  0  1  2  1 26   3.7292     384
  1  2  1 26  1  0  0  1  2  1 16   3.7292     384
  3  1  1 16  1  0  0  3  2  1 26   3.7292     382
  4  1  1 16 -1  0  0  4  2  1 26   3.7292     382
  3  2  1 26 -1  0  0  3  1  1 16   3.7292     383
  4  2  1 26  1  0  0  4  1  1 16   3.7292     383
  3  2  1 16  1  0  0  3  2  1 26   3.7292     384
  3  2  1 26 -1  0  0  3  2  1 16   3.7292     384
  3  1  1 18  0  0  0  2  2  1 20   3.7300     382
  2  2  1 20  0  0  0  3  1  1 18   3.7300     383
  4  1  1 18  0  0 -1  1  2  1 20   3.7300     382
  1  2  1 20  0  0  1  4  1  1 18   3.7300     383
  1  2  1 20  0  0  1  4  2  1 18   3.7300     384
  2  2  1 18  0  0  1  3  2  1 20   3.7300     384
  2  2  1 20  0  0  0  3  2  1 18   3.7300     384
  3  2  1 18  0  0  0  2  2  1 20   3.7300     384
  3  2  1 20  0  0 -1  2  2  1 18   3.7300     384
  4  2  1 18  0  0 -1  1  2  1 20   3.7300     384
  1  1  1 18  0  0  0  4  2  1 20   3.7300     382
  2  1  1 18  0  0  1  3  2  1 20   3.7300     382
  3  2  1 20  0  0 -1  2  1  1 18   3.7300     383
  4  2  1 20  0  0  0  1  1  1 18   3.7300     383
  1  2  1 18  0  0  0  4  2  1 20   3.7300     384
  4  2  1 20  0  0  0  1  2  1 18   3.7300     384
  1  1  1 28  1  0  1  3  2  1 27   3.7319     382
  2  1  1 28 -1  1  0  4  2  1 27   3.7319     382
  3  2  1 27 -1  0 -1  1  1  1 28   3.7319     383
  4  2  1 27  1 -1  0  2  1  1 28   3.7319     383
  3  1  1 28 -1  0 -1  1  2  1 27   3.7319     382
  1  2  1 27  1  0  1  3  1  1 28   3.7319     383
  4  1  1 28  1 -1  0  2  2  1 27   3.7319     382
  2  2  1 27 -1  1  0  4  1  1 28   3.7319     383
  2  1  1 24 -1  0  0  4  1  1 26   3.7331     381
  4  1  1 26  1  0  0  2  1  1 24   3.7331     381
  1  1  1 24  1 -1  1  3  1  1 26   3.7331     381
  1  1  1 26  1 -1  1  3  1  1 24   3.7331     381
  3  1  1 24 -1  1 -1  1  1  1 26   3.7331     381
  3  1  1 26 -1  1 -1  1  1  1 24   3.7331     381
  1  1  1 26  1 -1  1  3  2  1 24   3.7331     382
  3  1  1 26 -1  1 -1  1  2  1 24   3.7331     382
  4  1  1 26  1  0  0  2  2  1 24   3.7331     382
  1  2  1 24  1 -1  1  3  1  1 26   3.7331     383
  2  2  1 24 -1  0  0  4  1  1 26   3.7331     383
  3  2  1 24 -1  1 -1  1  1  1 26   3.7331     383
  2  1  1 26 -1  0  0  4  1  1 24   3.7332     381
  4  1  1 24  1  0  0  2  1  1 26   3.7332     381
  2  1  1 26 -1  0  0  4  2  1 24   3.7332     382
  4  2  1 24  1  0  0  2  1  1 26   3.7332     383
  1  1  1 18  1  0  0  2  1  1  2   3.7340     381
  2  1  1  2 -1  0  0  1  1  1 18   3.7340     381
  2  1  1  2 -1  0  0  1  2  1 18   3.7340     382
  1  2  1 18  1  0  0  2  1  1  2   3.7340     383
  1  1  1  2  1 -1  0  2  1  1 18   3.7341     381
  2  1  1 18 -1  1  0  1  1  1  2   3.7341     381
  3  1  1  2 -1  1  0  4  1  1 18   3.7341     381
  3  1  1 18 -1  0  0  4  1  1  2   3.7341     381
  4  1  1  2  1  0  0  3  1  1 18   3.7341     381
  4  1  1 18  1 -1  0  3  1  1  2   3.7341     381
  1  1  1 18  1  0  0  2  2  1  2   3.7341     382
  2  1  1 18 -1  1  0  1  2  1  2   3.7341     382
  3  1  1  2 -1  1  0  4  2  1 18   3.7341     382
  3  1  1 18 -1  0  0  4  2  1  2   3.7341     382
  4  1  1  2  1  0  0  3  2  1 18   3.7341     382
  4  1  1 18  1 -1  0  3  2  1  2   3.7341     382
  1  2  1  2  1 -1  0  2  1  1 18   3.7341     383
  2  2  1  2 -1  0  0  1  1  1 18   3.7341     383
  3  2  1  2 -1  1  0  4  1  1 18   3.7341     383
  3  2  1 18 -1  0  0  4  1  1  2   3.7341     383
  4  2  1  2  1  0  0  3  1  1 18   3.7341     383
  4  2  1 18  1 -1  0  3  1  1  2   3.7341     383
  1  2  1 18  1  0  0  2  2  1  2   3.7341     384
  2  2  1  2 -1  0  0  1  2  1 18   3.7341     384
  3  2  1  2 -1  1  0  4  2  1 18   3.7341     384
  3  2  1 18 -1  0  0  4  2  1  2   3.7341     384
  4  2  1  2  1  0  0  3  2  1 18   3.7341     384
  4  2  1 18  1 -1  0  3  2  1  2   3.7341     384
  1  1  1  2  1 -1  0  2  2  1 18   3.7341     382
  2  2  1 18 -1  1  0  1  1  1  2   3.7341     383
  1  2  1  2  1 -1  0  2  2  1 18   3.7341     384
  2  2  1 18 -1  1  0  1  2  1  2   3.7341     384
  2  1  1 24 -1  0  0  3  1  1 11   3.7386     385
  3  1  1 11  1  0  0  2  1  1 24   3.7386     385
  1  1  1 24  1  0  1  4  2  1 11   3.7386     386
  2  1  1 24 -1  0  0  3  2  1 11   3.7386     386
  3  1  1 11  1  0  0  2  2  1 24   3.7386     386
  2  2  1 24 -1  0  0  3  1  1 11   3.7386     387
  3  2  1 11  1  0  0  2  1  1 24   3.7386     387
  4  2  1 11 -1  0 -1  1  1  1 24   3.7386     387
  1  2  1 24  1  0  1  4  2  1 11   3.7386     388
  2  2  1 24 -1  0  0  3  2  1 11   3.7386     388
  3  2  1 11  1  0  0  2  2  1 24   3.7386     388
  4  2  1 11 -1  0 -1  1  2  1 24   3.7386     388
  1  1  1 11 -1  0  0  4  1  1 24   3.7386     385
  1  1  1 24  1  0  1  4  1  1 11   3.7386     385
  2  1  1 11  1  0  1  3  1  1 24   3.7386     385
  3  1  1 24 -1  0 -1  2  1  1 11   3.7386     385
  4  1  1 11 -1  0 -1  1  1  1 24   3.7386     385
  4  1  1 24  1  0  0  1  1  1 11   3.7386     385
  2  1  1 11  1  0  1  3  2  1 24   3.7386     386
  3  1  1 24 -1  0 -1  2  2  1 11   3.7386     386
  4  1  1 11 -1  0 -1  1  2  1 24   3.7386     386
  4  1  1 24  1  0  0  1  2  1 11   3.7386     386
  1  2  1 11 -1  0  0  4  1  1 24   3.7386     387
  1  2  1 24  1  0  1  4  1  1 11   3.7386     387
  2  2  1 11  1  0  1  3  1  1 24   3.7386     387
  3  2  1 24 -1  0 -1  2  1  1 11   3.7386     387
  2  2  1 11  1  0  1  3  2  1 24   3.7386     388
  3  2  1 24 -1  0 -1  2  2  1 11   3.7386     388
  1  1  1 11 -1  0  0  4  2  1 24   3.7386     386
  4  2  1 24  1  0  0  1  1  1 11   3.7386     387
  1  2  1 11 -1  0  0  4  2  1 24   3.7386     388
  4  2  1 24  1  0  0  1  2  1 11   3.7386     388
  3  1  1 21 -1  0  0  4  1  1 10   3.7396     385
  4  1  1 10  1  0  0  3  1  1 21   3.7396     385
  1  1  1 10  1 -1  0  2  1  1 21   3.7396     385
  1  1  1 21  1  0  0  2  1  1 10   3.7396     385
  2  1  1 10 -1  0  0  1  1  1 21   3.7396     385
  2  1  1 21 -1  1  0  1  1  1 10   3.7396     385
  3  1  1 10 -1  1  0  4  1  1 21   3.7396     385
  4  1  1 21  1 -1  0  3  1  1 10   3.7396     385
  2  1  1 21 -1  1  0  1  2  1 10   3.7396     386
  3  1  1 21 -1  0  0  4  2  1 10   3.7396     386
  1  2  1 10  1 -1  0  2  1  1 21   3.7396     387
  4  2  1 10  1  0  0  3  1  1 21   3.7396     387
  1  1  1 21  1  0  0  2  2  1 10   3.7397     386
  4  1  1 21  1 -1  0  3  2  1 10   3.7397     386
  2  2  1 10 -1  0  0  1  1  1 21   3.7397     387
  3  2  1 10 -1  1  0  4  1  1 21   3.7397     387
  1  1  1  7  0  0  1  4  1  1 14   3.7415     385
  1  1  1 14  0  0  0  4  1  1  7   3.7415     385
  2  1  1  7  0  0  0  3  1  1 14   3.7415     385
  3  1  1 14  0  0  0  2  1  1  7   3.7415     385
  4  1  1  7  0  0  0  1  1  1 14   3.7415     385
  4  1  1 14  0  0 -1  1  1  1  7   3.7415     385
  1  1  1 14  0  0  0  4  2  1  7   3.7415     386
  2  1  1 14  0  0  1  3  2  1  7   3.7415     386
  3  1  1 14  0  0  0  2  2  1  7   3.7415     386
  4  1  1  7  0  0  0  1  2  1 14   3.7415     386
  4  1  1 14  0  0 -1  1  2  1  7   3.7415     386
  1  2  1  7  0  0  1  4  1  1 14   3.7415     387
  1  2  1 14  0  0  0  4  1  1  7   3.7415     387
  2  2  1  7  0  0  0  3  1  1 14   3.7415     387
  3  2  1  7  0  0 -1  2  1  1 14   3.7415     387
  4  2  1  7  0  0  0  1  1  1 14   3.7415     387
  1  2  1 14  0  0  0  4  2  1  7   3.7415     388
  2  2  1 14  0  0  1  3  2  1  7   3.7415     388
  3  2  1  7  0  0 -1  2  2  1 14   3.7415     388
  4  2  1  7  0  0  0  1  2  1 14   3.7415     388
  2  1  1 14  0  0  1  3  1  1  7   3.7415     385
  3  1  1  7  0  0 -1  2  1  1 14   3.7415     385
  1  1  1  7  0  0  1  4  2  1 14   3.7415     386
  2  1  1  7  0  0  0  3  2  1 14   3.7415     386
  3  1  1  7  0  0 -1  2  2  1 14   3.7415     386
  2  2  1 14  0  0  1  3  1  1  7   3.7415     387
  3  2  1 14  0  0  0  2  1  1  7   3.7415     387
  4  2  1 14  0  0 -1  1  1  1  7   3.7415     387
  1  2  1  7  0  0  1  4  2  1 14   3.7415     388
  2  2  1  7  0  0  0  3  2  1 14   3.7415     388
  3  2  1 14  0  0  0  2  2  1  7   3.7415     388
  4  2  1 14  0  0 -1  1  2  1  7   3.7415     388
  4  1  1 10  1  0  0  3  2  1 27   3.7468     390
  3  2  1 27 -1  0  0  4  1  1 10   3.7468     391
  1  1  1 10  1 -1  0  2  2  1 27   3.7469     390
  2  1  1 10 -1  0  0  1  2  1 27   3.7469     390
  3  1  1 10 -1  1  0  4  2  1 27   3.7469     390
  1  2  1 27  1  0  0  2  1  1 10   3.7469     391
  2  2  1 27 -1  1  0  1  1  1 10   3.7469     391
  4  2  1 27  1 -1  0  3  1  1 10   3.7469     391
  1  2  1 10  1 -1  0  2  2  1 27   3.7469     392
  1  2  1 27  1  0  0  2  2  1 10   3.7469     392
  2  2  1 10 -1  0  0  1  2  1 27   3.7469     392
  2  2  1 27 -1  1  0  1  2  1 10   3.7469     392
  3  2  1 27 -1  0  0  4  2  1 10   3.7469     392
  4  2  1 10  1  0  0  3  2  1 27   3.7469     392
  3  2  1 10 -1  1  0  4  2  1 27   3.7469     392
  4  2  1 27  1 -1  0  3  2  1 10   3.7469     392
  3  1  1 21 -1  0  0  4  1  1 26   3.7482     389
  4  1  1 26  1  0  0  3  1  1 21   3.7482     389
  1  1  1 26  1 -1  0  2  1  1 21   3.7482     389
  2  1  1 21 -1  1  0  1  1  1 26   3.7482     389
  1  1  1 21  1  0  0  2  1  1 26   3.7482     389
  2  1  1 26 -1  0  0  1  1  1 21   3.7482     389
  3  1  1 26 -1  1  0  4  1  1 21   3.7482     389
  4  1  1 21  1 -1  0  3  1  1 26   3.7482     389
  2  1  1 13 -1  1  0  4  1  1 24   3.7497     389
  4  1  1 24  1 -1  0  2  1  1 13   3.7497     389
  2  1  1 13 -1  1  0  4  2  1 24   3.7497     390
  4  1  1 24  1 -1  0  2  2  1 13   3.7497     390
  2  2  1 13 -1  1  0  4  1  1 24   3.7497     391
  4  2  1 24  1 -1  0  2  1  1 13   3.7497     391
  2  2  1 13 -1  1  0  4  2  1 24   3.7497     392
  2  2  1 24 -1  1  0  4  2  1 13   3.7497     392
  4  2  1 13  1 -1  0  2  2  1 24   3.7497     392
  4  2  1 24  1 -1  0  2  2  1 13   3.7497     392
  1  1  1 13  1  0  1  3  1  1 24   3.7497     389
  3  1  1 24 -1  0 -1  1  1  1 13   3.7497     389
  1  1  1 13  1  0  1  3  2  1 24   3.7497     390
  1  1  1 24  1  0  1  3  2  1 13   3.7497     390
  2  1  1 24 -1  1  0  4  2  1 13   3.7497     390
  3  1  1 24 -1  0 -1  1  2  1 13   3.7497     390
  4  1  1 13  1 -1  0  2  2  1 24   3.7497     390
  1  2  1 13  1  0  1  3  1  1 24   3.7497     391
  2  2  1 24 -1  1  0  4  1  1 13   3.7497     391
  3  2  1 13 -1  0 -1  1  1  1 24   3.7497     391
  3  2  1 24 -1  0 -1  1  1  1 13   3.7497     391
  4  2  1 13  1 -1  0  2  1  1 24   3.7497     391
  1  2  1 13  1  0  1  3  2  1 24   3.7497     392
  1  2  1 24  1  0  1  3  2  1 13   3.7497     392
  3  2  1 13 -1  0 -1  1  2  1 24   3.7497     392
  3  2  1 24 -1  0 -1  1  2  1 13   3.7497     392
  1  1  1 24  1  0  1  3  1  1 13   3.7497     389
  2  1  1 24 -1  1  0  4  1  1 13   3.7497     389
  3  1  1 13 -1  0 -1  1  1  1 24   3.7497     389
  4  1  1 13  1 -1  0  2  1  1 24   3.7497     389
  3  1  1 13 -1  0 -1  1  2  1 24   3.7497     390
  1  2  1 24  1  0  1  3  1  1 13   3.7497     391
  1  1  1  4  1  0  0  1  1  1 28   3.7518     393
  2  1  1  4 -1  0  0  2  1  1 28   3.7518     393
  2  1  1 28  1  0  0  2  1  1  4   3.7518     393
  3  1  1  4 -1  0  0  3  1  1 28   3.7518     393
  3  1  1 28  1  0  0  3  1  1  4   3.7518     393
  2  1  1 28  1  0  0  2  2  1  4   3.7518     394
  3  1  1 28  1  0  0  3  2  1  4   3.7518     394
  2  2  1  4 -1  0  0  2  1  1 28   3.7518     395
  3  2  1  4 -1  0  0  3  1  1 28   3.7518     395
  1  1  1 28 -1  0  0  1  1  1  4   3.7519     393
  4  1  1  4  1  0  0  4  1  1 28   3.7519     393
  4  1  1 28 -1  0  0  4  1  1  4   3.7519     393
  1  1  1 28 -1  0  0  1  2  1  4   3.7519     394
  4  1  1 28 -1  0  0  4  2  1  4   3.7519     394
  1  2  1  4  1  0  0  1  1  1 28   3.7519     395
  4  2  1  4  1  0  0  4  1  1 28   3.7519     395
  2  2  1  8 -1  1  0  4  2  1 21   3.7541     396
  2  2  1 21 -1  1  0  4  2  1  8   3.7541     396
  4  2  1  8  1 -1  0  2  2  1 21   3.7541     396
  4  2  1 21  1 -1  0  2  2  1  8   3.7541     396
  1  1  1  8  1  0  1  3  2  1 21   3.7542     394
  2  1  1  8 -1  1  0  4  2  1 21   3.7542     394
  4  1  1  8  1 -1  0  2  2  1 21   3.7542     394
  2  2  1 21 -1  1  0  4  1  1  8   3.7542     395
  3  2  1 21 -1  0 -1  1  1  1  8   3.7542     395
  4  2  1 21  1 -1  0  2  1  1  8   3.7542     395
  1  2  1  8  1  0  1  3  2  1 21   3.7542     396
  3  2  1 21 -1  0 -1  1  2  1  8   3.7542     396
  3  1  1  8 -1  0 -1  1  2  1 21   3.7542     394
  1  2  1 21  1  0  1  3  1  1  8   3.7542     395
  1  2  1 21  1  0  1  3  2  1  8   3.7542     396
  3  2  1  8 -1  0 -1  1  2  1 21   3.7542     396
  1  1  1 27  0  0  1  4  1  1 17   3.7546     393
  4  1  1 17  0  0 -1  1  1  1 27   3.7546     393
  2  1  1 27  0  0  0  3  2  1 17   3.7546     394
  3  2  1 17  0  0  0  2  1  1 27   3.7546     395
  2  1  1 27  0  0  0  3  1  1 17   3.7546     393
  3  1  1 17  0  0  0  2  1  1 27   3.7546     393
  1  1  1 27  0  0  1  4  2  1 17   3.7546     394
  4  2  1 17  0  0 -1  1  1  1 27   3.7546     395
  1  1  1 17  0  0  0  4  1  1 27   3.7546     393
  2  1  1 17  0  0  1  3  1  1 27   3.7546     393
  3  1  1 27  0  0 -1  2  1  1 17   3.7546     393
  4  1  1 27  0  0  0  1  1  1 17   3.7546     393
  3  1  1 27  0  0 -1  2  2  1 17   3.7546     394
  4  1  1 27  0  0  0  1  2  1 17   3.7546     394
  1  2  1 17  0  0  0  4  1  1 27   3.7546     395
  2  2  1 17  0  0  1  3  1  1 27   3.7546     395
  3  1  1 18  0  0  0  4  1  1 28   3.7596     397
  4  1  1 28  0  0  0  3  1  1 18   3.7596     397
  1  1  1 28  0 -1  0  2  1  1 18   3.7596     397
  2  1  1 18  0  1  0  1  1  1 28   3.7596     397
  1  1  1 28  0 -1  0  2  2  1 18   3.7596     398
  2  1  1 28  0  0  0  1  2  1 18   3.7596     398
  3  1  1 28  0  1  0  4  2  1 18   3.7596     398
  4  1  1 28  0  0  0  3  2  1 18   3.7596     398
  1  2  1 18  0  0  0  2  1  1 28   3.7596     399
  2  2  1 18  0  1  0  1  1  1 28   3.7596     399
  3  2  1 18  0  0  0  4  1  1 28   3.7596     399
  4  2  1 18  0 -1  0  3  1  1 28   3.7596     399
  1  1  1 18  0  0  0  2  1  1 28   3.7596     397
  2  1  1 28  0  0  0  1  1  1 18   3.7596     397
  3  1  1 28  0  1  0  4  1  1 18   3.7596     397
  4  1  1 18  0 -1  0  3  1  1 28   3.7596     397
  1  1  1 27  1 -1  0  2  2  1 21   3.7604     398
  2  2  1 21 -1  1  0  1  1  1 27   3.7604     399
  2  1  1 27 -1  0  0  1  2  1 21   3.7604     398
  3  1  1 27 -1  1  0  4  2  1 21   3.7604     398
  4  1  1 27  1  0  0  3  2  1 21   3.7604     398
  1  2  1 21  1  0  0  2  1  1 27   3.7604     399
  3  2  1 21 -1  0  0  4  1  1 27   3.7604     399
  4  2  1 21  1 -1  0  3  1  1 27   3.7604     399
  1  1  1  3  1 -1  0  2  1  1 13   3.7663     401
  1  1  1 13  1  0  0  2  1  1  3   3.7663     401
  2  1  1  3 -1  0  0  1  1  1 13   3.7663     401
  2  1  1 13 -1  1  0  1  1  1  3   3.7663     401
  3  1  1  3 -1  1  0  4  1  1 13   3.7663     401
  4  1  1 13  1 -1  0  3  1  1  3   3.7663     401
  2  1  1  3 -1  0  0  1  2  1 13   3.7663     402
  3  1  1  3 -1  1  0  4  2  1 13   3.7663     402
  1  2  1  3  1 -1  0  2  1  1 13   3.7663     403
  1  2  1 13  1  0  0  2  1  1  3   3.7663     403
  4  2  1 13  1 -1  0  3  1  1  3   3.7663     403
  3  1  1 13 -1  0  0  4  1  1  3   3.7663     401
  4  1  1  3  1  0  0  3  1  1 13   3.7663     401
  1  1  1  3  1 -1  0  2  2  1 13   3.7663     402
  1  1  1 13  1  0  0  2  2  1  3   3.7663     402
  2  1  1 13 -1  1  0  1  2  1  3   3.7663     402
  3  1  1 13 -1  0  0  4  2  1  3   3.7663     402
  4  1  1  3  1  0  0  3  2  1 13   3.7663     402
  4  1  1 13  1 -1  0  3  2  1  3   3.7663     402
  2  2  1  3 -1  0  0  1  1  1 13   3.7663     403
  2  2  1 13 -1  1  0  1  1  1  3   3.7663     403
  3  2  1  3 -1  1  0  4  1  1 13   3.7663     403
  3  2  1 13 -1  0  0  4  1  1  3   3.7663     403
  4  2  1  3  1  0  0  3  1  1 13   3.7663     403
  1  2  1  3  1 -1  0  2  2  1 13   3.7663     404
  1  2  1 13  1  0  0  2  2  1  3   3.7663     404
  2  2  1  3 -1  0  0  1  2  1 13   3.7663     404
  2  2  1 13 -1  1  0  1  2  1  3   3.7663     404
  3  2  1  3 -1  1  0  4  2  1 13   3.7663     404
  3  2  1 13 -1  0  0  4  2  1  3   3.7663     404
  4  2  1  3  1  0  0  3  2  1 13   3.7663     404
  4  2  1 13  1 -1  0  3  2  1  3   3.7663     404
  1  1  1  5  2  0  1  3  1  1 22   3.7682     401
  1  1  1 22  2  0  1  3  1  1  5   3.7682     401
  3  1  1  5 -2  0 -1  1  1  1 22   3.7682     401
  3  1  1 22 -2  0 -1  1  1  1  5   3.7682     401
  3  1  1  5 -2  0 -1  1  2  1 22   3.7682     402
  3  1  1 22 -2  0 -1  1  2  1  5   3.7682     402
  1  2  1  5  2  0  1  3  1  1 22   3.7682     403
  1  2  1 22  2  0  1  3  1  1  5   3.7682     403
  2  1  1  5 -2  1  0  4  1  1 22   3.7682     401
  2  1  1 22 -2  1  0  4  1  1  5   3.7682     401
  4  1  1  5  2 -1  0  2  1  1 22   3.7682     401
  4  1  1 22  2 -1  0  2  1  1  5   3.7682     401
  1  1  1  5  2  0  1  3  2  1 22   3.7682     402
  1  1  1 22  2  0  1  3  2  1  5   3.7682     402
  4  1  1  5  2 -1  0  2  2  1 22   3.7682     402
  4  1  1 22  2 -1  0  2  2  1  5   3.7682     402
  2  2  1  5 -2  1  0  4  1  1 22   3.7682     403
  2  2  1 22 -2  1  0  4  1  1  5   3.7682     403
  3  2  1  5 -2  0 -1  1  1  1 22   3.7682     403
  3  2  1 22 -2  0 -1  1  1  1  5   3.7682     403
  1  2  1  5  2  0  1  3  2  1 22   3.7682     404
  1  2  1 22  2  0  1  3  2  1  5   3.7682     404
  3  2  1  5 -2  0 -1  1  2  1 22   3.7682     404
  3  2  1 22 -2  0 -1  1  2  1  5   3.7682     404
  2  1  1  5 -2  1  0  4  2  1 22   3.7682     402
  2  1  1 22 -2  1  0  4  2  1  5   3.7682     402
  4  2  1  5  2 -1  0  2  1  1 22   3.7682     403
  4  2  1 22  2 -1  0  2  1  1  5   3.7682     403
  2  2  1  5 -2  1  0  4  2  1 22   3.7682     404
  2  2  1 22 -2  1  0  4  2  1  5   3.7682     404
  4  2  1  5  2 -1  0  2  2  1 22   3.7682     404
  4  2  1 22  2 -1  0  2  2  1  5   3.7682     404
  1  1  1 18  0  0  0  2  1  1 27   3.7717     405
  1  1  1 27  0 -1  0  2  1  1 18   3.7717     405
  2  1  1 18  0  1  0  1  1  1 27   3.7717     405
  2  1  1 27  0  0  0  1  1  1 18   3.7717     405
  3  1  1 18  0  0  0  4  1  1 27   3.7717     405
  4  1  1 27  0  0  0  3  1  1 18   3.7717     405
  1  1  1 27  0 -1  0  2  2  1 18   3.7717     406
  2  1  1 27  0  0  0  1  2  1 18   3.7717     406
  3  1  1 27  0  1  0  4  2  1 18   3.7717     406
  1  2  1 18  0  0  0  2  1  1 27   3.7717     407
  2  2  1 18  0  1  0  1  1  1 27   3.7717     407
  4  2  1 18  0 -1  0  3  1  1 27   3.7717     407
  3  1  1 27  0  1  0  4  1  1 18   3.7717     405
  4  1  1 18  0 -1  0  3  1  1 27   3.7717     405
  4  1  1 27  0  0  0  3  2  1 18   3.7717     406
  3  2  1 18  0  0  0  4  1  1 27   3.7717     407
  4  1  1 19  1 -1  0  2  2  1  7   3.7747     406
  2  2  1  7 -1  1  0  4  1  1 19   3.7747     407
  2  2  1  7 -1  1  0  4  2  1 19   3.7747     408
  4  2  1 19  1 -1  0  2  2  1  7   3.7747     408
  2  1  1  7 -1  1  0  4  1  1 19   3.7747     405
  2  1  1 19 -1  1  0  4  1  1  7   3.7747     405
  4  1  1  7  1 -1  0  2  1  1 19   3.7747     405
  4  1  1 19  1 -1  0  2  1  1  7   3.7747     405
  1  1  1  7  1  0  1  3  2  1 19   3.7747     406
  2  1  1  7 -1  1  0  4  2  1 19   3.7747     406
  2  1  1 19 -1  1  0  4  2  1  7   3.7747     406
  4  1  1  7  1 -1  0  2  2  1 19   3.7747     406
  2  2  1 19 -1  1  0  4  1  1  7   3.7747     407
  3  2  1 19 -1  0 -1  1  1  1  7   3.7747     407
  4  2  1  7  1 -1  0  2  1  1 19   3.7747     407
  4  2  1 19  1 -1  0  2  1  1  7   3.7747     407
  1  2  1  7  1  0  1  3  2  1 19   3.7747     408
  2  2  1 19 -1  1  0  4  2  1  7   3.7747     408
  3  2  1 19 -1  0 -1  1  2  1  7   3.7747     408
  4  2  1  7  1 -1  0  2  2  1 19   3.7747     408
  1  1  1 19  1  0  1  3  1  1  7   3.7747     405
  3  1  1  7 -1  0 -1  1  1  1 19   3.7747     405
  1  1  1 19  1  0  1  3  2  1  7   3.7747     406
  3  1  1  7 -1  0 -1  1  2  1 19   3.7747     406
  1  2  1 19  1  0  1  3  1  1  7   3.7747     407
  3  2  1  7 -1  0 -1  1  1  1 19   3.7747     407
  1  2  1 19  1  0  1  3  2  1  7   3.7747     408
  3  2  1  7 -1  0 -1  1  2  1 19   3.7747     408
  1  1  1  7  1  0  1  3  1  1 19   3.7747     405
  3  1  1 19 -1  0 -1  1  1  1  7   3.7747     405
  3  1  1 19 -1  0 -1  1  2  1  7   3.7747     406
  1  2  1  7  1  0  1  3  1  1 19   3.7747     407
  1  1  1 27  0  0  1  4  1  1 12   3.7801     409
  2  1  1 27  0  0  0  3  1  1 12   3.7801     409
  3  1  1 12  0  0  0  2  1  1 27   3.7801     409
  4  1  1 12  0  0 -1  1  1  1 27   3.7801     409
  2  1  1 27  0  0  0  3  2  1 12   3.7801     410
  3  2  1 12  0  0  0  2  1  1 27   3.7801     411
  1  1  1 27  0  0  1  4  2  1 12   3.7801     410
  4  2  1 12  0  0 -1  1  1  1 27   3.7801     411
  1  1  1 12  0  0  0  4  1  1 27   3.7801     409
  2  1  1 12  0  0  1  3  1  1 27   3.7801     409
  3  1  1 27  0  0 -1  2  1  1 12   3.7801     409
  4  1  1 27  0  0  0  1  1  1 12   3.7801     409
  3  1  1 27  0  0 -1  2  2  1 12   3.7801     410
  4  1  1 27  0  0  0  1  2  1 12   3.7801     410
  1  2  1 12  0  0  0  4  1  1 27   3.7801     411
  2  2  1 12  0  0  1  3  1  1 27   3.7801     411
  2  1  1 13 -1  1  0  4  1  1  5   3.7833     409
  4  1  1  5  1 -1  0  2  1  1 13   3.7833     409
  4  1  1  5  1 -1  0  2  2  1 13   3.7833     410
  2  2  1 13 -1  1  0  4  1  1  5   3.7833     411
  2  1  1 13 -1  1  0  4  2  1  5   3.7833     410
  3  2  1  5 -1  0 -1  1  1  1 13   3.7833     411
  4  2  1  5  1 -1  0  2  1  1 13   3.7833     411
  1  2  1 13  1  0  1  3  2  1  5   3.7833     412
  2  2  1 13 -1  1  0  4  2  1  5   3.7833     412
  3  2  1  5 -1  0 -1  1  2  1 13   3.7833     412
  4  2  1  5  1 -1  0  2  2  1 13   3.7833     412
  1  1  1 13  1  0  1  3  2  1  5   3.7833     410
  2  2  1  5 -1  1  0  4  2  1 13   3.7833     412
  4  2  1 13  1 -1  0  2  2  1  5   3.7833     412
  1  1  1 13  1  0  1  3  1  1  5   3.7833     409
  3  1  1  5 -1  0 -1  1  1  1 13   3.7833     409
  1  1  1  5  1  0  1  3  2  1 13   3.7833     410
  2  1  1  5 -1  1  0  4  2  1 13   3.7833     410
  3  1  1  5 -1  0 -1  1  2  1 13   3.7833     410
  4  1  1 13  1 -1  0  2  2  1  5   3.7833     410
  1  2  1 13  1  0  1  3  1  1  5   3.7833     411
  2  2  1  5 -1  1  0  4  1  1 13   3.7833     411
  3  2  1 13 -1  0 -1  1  1  1  5   3.7833     411
  4  2  1 13  1 -1  0  2  1  1  5   3.7833     411
  1  2  1  5  1  0  1  3  2  1 13   3.7833     412
  3  2  1 13 -1  0 -1  1  2  1  5   3.7833     412
  1  1  1  5  1  0  1  3  1  1 13   3.7834     409
  2  1  1  5 -1  1  0  4  1  1 13   3.7834     409
  3  1  1 13 -1  0 -1  1  1  1  5   3.7834     409
  4  1  1 13  1 -1  0  2  1  1  5   3.7834     409
  3  1  1 13 -1  0 -1  1  2  1  5   3.7834     410
  1  2  1  5  1  0  1  3  1  1 13   3.7834     411
  1  1  1 20  0  0  1  4  1  1 18   3.7873     413
  2  1  1 20  0  0  0  3  1  1 18   3.7873     413
  3  1  1 18  0  0  0  2  1  1 20   3.7873     413
  4  1  1 18  0  0 -1  1  1  1 20   3.7873     413
  1  1  1 18  0  0  0  4  1  1 20   3.7873     413
  2  1  1 18  0  0  1  3  1  1 20   3.7873     413
  3  1  1 20  0  0 -1  2  1  1 18   3.7873     413
  4  1  1 20  0  0  0  1  1  1 18   3.7873     413
  1  1  1 20  0  0  1  4  2  1 18   3.7873     414
  2  1  1 20  0  0  0  3  2  1 18   3.7873     414
  3  1  1 20  0  0 -1  2  2  1 18   3.7873     414
  4  1  1 20  0  0  0  1  2  1 18   3.7873     414
  1  2  1 18  0  0  0  4  1  1 20   3.7873     415
  2  2  1 18  0  0  1  3  1  1 20   3.7873     415
  3  2  1 18  0  0  0  2  1  1 20   3.7873     415
  4  2  1 18  0  0 -1  1  1  1 20   3.7873     415
  1  1  1 20  1 -1  0  2  2  1 28   3.7874     414
  2  2  1 28 -1  1  0  1  1  1 20   3.7874     415
  2  1  1 20 -1  0  0  1  2  1 28   3.7874     414
  3  1  1 20 -1  1  0  4  2  1 28   3.7874     414
  4  1  1 20  1  0  0  3  2  1 28   3.7874     414
  1  2  1 28  1  0  0  2  1  1 20   3.7874     415
  3  2  1 28 -1  0  0  4  1  1 20   3.7874     415
  4  2  1 28  1 -1  0  3  1  1 20   3.7874     415
  2  1  1 11 -1  1  0  4  1  1 22   3.7921     413
  4  1  1 22  1 -1  0  2  1  1 11   3.7921     413
  4  1  1 22  1 -1  0  2  2  1 11   3.7921     414
  2  2  1 11 -1  1  0  4  1  1 22   3.7921     415
  2  1  1 11 -1  1  0  4  2  1 22   3.7921     414
  4  2  1 22  1 -1  0  2  1  1 11   3.7921     415
  2  2  1 11 -1  1  0  4  2  1 22   3.7921     416
  4  2  1 22  1 -1  0  2  2  1 11   3.7921     416
  1  1  1 11  1  0  1  3  2  1 22   3.7921     414
  3  2  1 22 -1  0 -1  1  1  1 11   3.7921     415
  1  2  1 11  1  0  1  3  2  1 22   3.7921     416
  3  2  1 22 -1  0 -1  1  2  1 11   3.7921     416
  2  2  1 22 -1  1  0  4  2  1 11   3.7921     416
  4  2  1 11  1 -1  0  2  2  1 22   3.7921     416
  1  1  1 11  1  0  1  3  1  1 22   3.7921     413
  1  1  1 22  1  0  1  3  1  1 11   3.7921     413
  3  1  1 11 -1  0 -1  1  1  1 22   3.7921     413
  3  1  1 22 -1  0 -1  1  1  1 11   3.7921     413
  1  1  1 22  1  0  1  3  2  1 11   3.7921     414
  2  1  1 22 -1  1  0  4  2  1 11   3.7921     414
  3  1  1 11 -1  0 -1  1  2  1 22   3.7921     414
  3  1  1 22 -1  0 -1  1  2  1 11   3.7921     414
  4  1  1 11  1 -1  0  2  2  1 22   3.7921     414
  1  2  1 11  1  0  1  3  1  1 22   3.7921     415
  1  2  1 22  1  0  1  3  1  1 11   3.7921     415
  2  2  1 22 -1  1  0  4  1  1 11   3.7921     415
  3  2  1 11 -1  0 -1  1  1  1 22   3.7921     415
  4  2  1 11  1 -1  0  2  1  1 22   3.7921     415
  1  2  1 22  1  0  1  3  2  1 11   3.7921     416
  3  2  1 11 -1  0 -1  1  2  1 22   3.7921     416
  2  1  1 22 -1  1  0  4  1  1 11   3.7921     413
  4  1  1 11  1 -1  0  2  1  1 22   3.7921     413
  1  1  1 10  1 -1  0  2  2  1 21   3.7933     418
  2  1  1 10 -1  0  0  1  2  1 21   3.7933     418
  4  1  1 10  1  0  0  3  2  1 21   3.7933     418
  1  2  1 21  1  0  0  2  1  1 10   3.7933     419
  2  2  1 21 -1  1  0  1  1  1 10   3.7933     419
  3  2  1 21 -1  0  0  4  1  1 10   3.7933     419
  1  2  1 10  1 -1  0  2  2  1 21   3.7933     420
  2  2  1 21 -1  1  0  1  2  1 10   3.7933     420
  3  1  1 10 -1  1  0  4  2  1 21   3.7933     418
  4  2  1 21  1 -1  0  3  1  1 10   3.7933     419
  1  2  1 21  1  0  0  2  2  1 10   3.7933     420
  2  2  1 10 -1  0  0  1  2  1 21   3.7933     420
  3  2  1 10 -1  1  0  4  2  1 21   3.7933     420
  3  2  1 21 -1  0  0  4  2  1 10   3.7933     420
  4  2  1 10  1  0  0  3  2  1 21   3.7933     420
  4  2  1 21  1 -1  0  3  2  1 10   3.7933     420
  1  1  1 20  0  0  1  4  1  1 17   3.7987     421
  4  1  1 17  0  0 -1  1  1  1 20   3.7987     421
  2  1  1 20  0  0  0  3  2  1 17   3.7987     422
  3  2  1 17  0  0  0  2  1  1 20   3.7987     423
  2  1  1 20  0  0  0  3  1  1 17   3.7987     421
  3  1  1 17  0  0  0  2  1  1 20   3.7987     421
  1  1  1 20  0  0  1  4  2  1 17   3.7987     422
  4  2  1 17  0  0 -1  1  1  1 20   3.7987     423
  1  1  1 17  0  0  0  4  1  1 20   3.7987     421
  4  1  1 20  0  0  0  1  1  1 17   3.7987     421
  4  1  1 20  0  0  0  1  2  1 17   3.7987     422
  1  2  1 17  0  0  0  4  1  1 20   3.7987     423
  2  1  1 17  0  0  1  3  1  1 20   3.7987     421
  3  1  1 20  0  0 -1  2  1  1 17   3.7987     421
  3  1  1 20  0  0 -1  2  2  1 17   3.7987     422
  2  2  1 17  0  0  1  3  1  1 20   3.7987     423
  2  1  1 11 -1  1  0  4  1  1  5   3.8042     425
  4  1  1  5  1 -1  0  2  1  1 11   3.8042     425
  4  1  1  5  1 -1  0  2  2  1 11   3.8042     426
  2  2  1 11 -1  1  0  4  1  1  5   3.8042     427
  1  1  1 11  1  0  1  3  2  1  5   3.8042     426
  2  1  1 11 -1  1  0  4  2  1  5   3.8042     426
  3  2  1  5 -1  0 -1  1  1  1 11   3.8042     427
  4  2  1  5  1 -1  0  2  1  1 11   3.8042     427
  1  2  1 11  1  0  1  3  2  1  5   3.8042     428
  2  2  1  5 -1  1  0  4  2  1 11   3.8042     428
  2  2  1 11 -1  1  0  4  2  1  5   3.8042     428
  3  2  1  5 -1  0 -1  1  2  1 11   3.8042     428
  4  2  1  5  1 -1  0  2  2  1 11   3.8042     428
  4  2  1 11  1 -1  0  2  2  1  5   3.8042     428
  1  1  1  5  1  0  1  3  1  1 11   3.8042     425
  1  1  1 11  1  0  1  3  1  1  5   3.8042     425
  3  1  1  5 -1  0 -1  1  1  1 11   3.8042     425
  3  1  1 11 -1  0 -1  1  1  1  5   3.8042     425
  1  1  1  5  1  0  1  3  2  1 11   3.8042     426
  2  1  1  5 -1  1  0  4  2  1 11   3.8042     426
  3  1  1  5 -1  0 -1  1  2  1 11   3.8042     426
  3  1  1 11 -1  0 -1  1  2  1  5   3.8042     426
  4  1  1 11  1 -1  0  2  2  1  5   3.8042     426
  1  2  1  5  1  0  1  3  1  1 11   3.8042     427
  1  2  1 11  1  0  1  3  1  1  5   3.8042     427
  2  2  1  5 -1  1  0  4  1  1 11   3.8042     427
  3  2  1 11 -1  0 -1  1  1  1  5   3.8042     427
  4  2  1 11  1 -1  0  2  1  1  5   3.8042     427
  1  2  1  5  1  0  1  3  2  1 11   3.8042     428
  3  2  1 11 -1  0 -1  1  2  1  5   3.8042     428
  2  1  1  5 -1  1  0  4  1  1 11   3.8043     425
  4  1  1 11  1 -1  0  2  1  1  5   3.8043     425
  4  1  1 15  1 -1  0  2  2  1  7   3.8064     426
  2  2  1  7 -1  1  0  4  1  1 15   3.8064     427
  2  2  1  7 -1  1  0  4  2  1 15   3.8064     428
  4  2  1 15  1 -1  0  2  2  1  7   3.8064     428
  1  1  1 15  1  0  1  3  1  1  7   3.8064     425
  2  1  1  7 -1  1  0  4  1  1 15   3.8064     425
  2  1  1 15 -1  1  0  4  1  1  7   3.8064     425
  3  1  1  7 -1  0 -1  1  1  1 15   3.8064     425
  4  1  1  7  1 -1  0  2  1  1 15   3.8064     425
  4  1  1 15  1 -1  0  2  1  1  7   3.8064     425
  1  1  1  7  1  0  1  3  2  1 15   3.8064     426
  1  1  1 15  1  0  1  3  2  1  7   3.8064     426
  2  1  1  7 -1  1  0  4  2  1 15   3.8064     426
  2  1  1 15 -1  1  0  4  2  1  7   3.8064     426
  3  1  1  7 -1  0 -1  1  2  1 15   3.8064     426
  4  1  1  7  1 -1  0  2  2  1 15   3.8064     426
  1  2  1 15  1  0  1  3  1  1  7   3.8064     427
  2  2  1 15 -1  1  0  4  1  1  7   3.8064     427
  3  2  1 15 -1  0 -1  1  1  1  7   3.8064     427
  4  2  1  7  1 -1  0  2  1  1 15   3.8064     427
  4  2  1 15  1 -1  0  2  1  1  7   3.8064     427
  1  2  1  7  1  0  1  3  2  1 15   3.8064     428
  1  2  1 15  1  0  1  3  2  1  7   3.8064     428
  2  2  1 15 -1  1  0  4  2  1  7   3.8064     428
  3  2  1 15 -1  0 -1  1  2  1  7   3.8064     428
  4  2  1  7  1 -1  0  2  2  1 15   3.8064     428
  1  1  1  7  1  0  1  3  1  1 15   3.8064     425
  3  1  1 15 -1  0 -1  1  1  1  7   3.8064     425
  3  1  1 15 -1  0 -1  1  2  1  7   3.8064     426
  1  2  1  7  1  0  1  3  1  1 15   3.8064     427
  3  2  1  7 -1  0 -1  1  1  1 15   3.8064     427
  3  2  1  7 -1  0 -1  1  2  1 15   3.8064     428
  2  1  1 17  1  0  0  2  2  1 26   3.8076     426
  2  2  1 26 -1  0  0  2  1  1 17   3.8076     427
  2  2  1 17  1  0  0  2  2  1 26   3.8076     428
  2  2  1 26 -1  0  0  2  2  1 17   3.8076     428
  1  1  1 17 -1  0  0  1  2  1 26   3.8077     426
  1  2  1 26  1  0  0  1  1  1 17   3.8077     427
  1  2  1 17 -1  0  0  1  2  1 26   3.8077     428
  1  2  1 26  1  0  0  1  2  1 17   3.8077     428
  4  2  1 17 -1  0  0  4  2  1 26   3.8077     428
  4  2  1 26  1  0  0  4  2  1 17   3.8077     428
  3  1  1 17  1  0  0  3  2  1 26   3.8077     426
  3  2  1 26 -1  0  0  3  1  1 17   3.8077     427
  3  2  1 17  1  0  0  3  2  1 26   3.8077     428
  3  2  1 26 -1  0  0  3  2  1 17   3.8077     428
  4  1  1 17 -1  0  0  4  2  1 26   3.8077     426
  4  2  1 26  1  0  0  4  1  1 17   3.8077     427
  2  1  1  5 -1  0  0  2  2  1 20   3.8094     430
  2  2  1 20  1  0  0  2  1  1  5   3.8094     431
  1  1  1  5  1  0  0  1  2  1 20   3.8094     430
  1  2  1 20 -1  0  0  1  1  1  5   3.8094     431
  1  2  1  5  1  0  0  1  2  1 20   3.8094     432
  1  2  1 20 -1  0  0  1  2  1  5   3.8094     432
  2  2  1  5 -1  0  0  2  2  1 20   3.8094     432
  2  2  1 20  1  0  0  2  2  1  5   3.8094     432
  3  1  1  5 -1  0  0  3  2  1 20   3.8094     430
  4  1  1  5  1  0  0  4  2  1 20   3.8094     430
  3  2  1 20  1  0  0  3  1  1  5   3.8094     431
  4  2  1 20 -1  0  0  4  1  1  5   3.8094     431
  4  2  1  5  1  0  0  4  2  1 20   3.8094     432
  4  2  1 20 -1  0  0  4  2  1  5   3.8094     432
  3  2  1  5 -1  0  0  3  2  1 20   3.8094     432
  3  2  1 20  1  0  0  3  2  1  5   3.8094     432
  1  1  1  8  1 -1  0  2  1  1 13   3.8100     429
  1  1  1 13  1  0  0  2  1  1  8   3.8100     429
  2  1  1  8 -1  0  0  1  1  1 13   3.8100     429
  2  1  1 13 -1  1  0  1  1  1  8   3.8100     429
  3  1  1  8 -1  1  0  4  1  1 13   3.8100     429
  4  1  1 13  1 -1  0  3  1  1  8   3.8100     429
  2  1  1  8 -1  0  0  1  2  1 13   3.8100     430
  2  1  1 13 -1  1  0  1  2  1  8   3.8100     430
  3  1  1  8 -1  1  0  4  2  1 13   3.8100     430
  4  1  1 13  1 -1  0  3  2  1  8   3.8100     430
  1  2  1  8  1 -1  0  2  1  1 13   3.8100     431
  1  2  1 13  1  0  0  2  1  1  8   3.8100     431
  3  2  1  8 -1  1  0  4  1  1 13   3.8100     431
  4  2  1 13  1 -1  0  3  1  1  8   3.8100     431
  3  2  1  8 -1  1  0  4  2  1 13   3.8100     432
  4  2  1 13  1 -1  0  3  2  1  8   3.8100     432
  3  1  1 13 -1  0  0  4  1  1  8   3.8100     429
  4  1  1  8  1  0  0  3  1  1 13   3.8100     429
  1  1  1  8  1 -1  0  2  2  1 13   3.8100     430
  1  1  1 13  1  0  0  2  2  1  8   3.8100     430
  4  1  1  8  1  0  0  3  2  1 13   3.8100     430
  2  2  1  8 -1  0  0  1  1  1 13   3.8100     431
  2  2  1 13 -1  1  0  1  1  1  8   3.8100     431
  3  2  1 13 -1  0  0  4  1  1  8   3.8100     431
  1  2  1  8  1 -1  0  2  2  1 13   3.8100     432
  1  2  1 13  1  0  0  2  2  1  8   3.8100     432
  2  2  1  8 -1  0  0  1  2  1 13   3.8100     432
  2  2  1 13 -1  1  0  1  2  1  8   3.8100     432
  3  1  1 13 -1  0  0  4  2  1  8   3.8100     430
  4  2  1  8  1  0  0  3  1  1 13   3.8100     431
  3  2  1 13 -1  0  0  4  2  1  8   3.8100     432
  4  2  1  8  1  0  0  3  2  1 13   3.8100     432
  2  1  1 21 -1  0  0  2  2  1 12   3.8104     430
  2  2  1 12  1  0  0  2  1  1 21   3.8104     431
  2  1  1 12  1  0  0  2  1  1 21   3.8104     429
  2  1  1 21 -1  0  0  2  1  1 12   3.8104     429
  1  1  1 12 -1  0  0  1  1  1 21   3.8104     429
  1  1  1 21  1  0  0  1  1  1 12   3.8104     429
  3  1  1 12  1  0  0  3  1  1 21   3.8104     429
  3  1  1 21 -1  0  0  3  1  1 12   3.8104     429
  1  1  1 21  1  0  0  1  2  1 12   3.8104     430
  3  1  1 21 -1  0  0  3  2  1 12   3.8104     430
  4  1  1 21  1  0  0  4  2  1 12   3.8104     430
  1  2  1 12 -1  0  0  1  1  1 21   3.8104     431
  3  2  1 12  1  0  0  3  1  1 21   3.8104     431
  4  2  1 12 -1  0  0  4  1  1 21   3.8104     431
  4  1  1 12 -1  0  0  4  1  1 21   3.8104     429
  4  1  1 21  1  0  0  4  1  1 12   3.8104     429
  4  1  1 21  1 -1  0  2  2  1  8   3.8110     430
  2  2  1  8 -1  1  0  4  1  1 21   3.8110     431
  2  1  1  8 -1  1  0  4  1  1 21   3.8110     429
  4  1  1 21  1 -1  0  2  1  1  8   3.8110     429
  2  1  1 21 -1  1  0  4  1  1  8   3.8110     429
  4  1  1  8  1 -1  0  2  1  1 21   3.8110     429
  1  1  1 21  1  0  1  3  2  1  8   3.8110     430
  2  1  1 21 -1  1  0  4  2  1  8   3.8110     430
  3  2  1  8 -1  0 -1  1  1  1 21   3.8110     431
  4  2  1  8  1 -1  0  2  1  1 21   3.8110     431
  1  1  1  8  1  0  1  3  1  1 21   3.8110     429
  1  1  1 21  1  0  1  3  1  1  8   3.8110     429
  3  1  1  8 -1  0 -1  1  1  1 21   3.8110     429
  3  1  1 21 -1  0 -1  1  1  1  8   3.8110     429
  3  1  1 21 -1  0 -1  1  2  1  8   3.8110     430
  1  2  1  8  1  0  1  3  1  1 21   3.8110     431
  3  1  1  9 -1  1  0  4  1  1 14   3.8137     429
  3  1  1 14 -1  0  0  4  1  1  9   3.8137     429
  4  1  1  9  1  0  0  3  1  1 14   3.8137     429
  4  1  1 14  1 -1  0  3  1  1  9   3.8137     429
  4  1  1 14  1 -1  0  3  2  1  9   3.8137     430
  3  2  1  9 -1  1  0  4  1  1 14   3.8137     431
  1  1  1  9  1 -1  0  2  1  1 14   3.8137     429
  1  1  1 14  1  0  0  2  1  1  9   3.8137     429
  2  1  1  9 -1  0  0  1  1  1 14   3.8137     429
  2  1  1 14 -1  1  0  1  1  1  9   3.8137     429
  1  1  1  9  1 -1  0  2  2  1 14   3.8137     430
  2  1  1  9 -1  0  0  1  2  1 14   3.8137     430
  2  1  1 14 -1  1  0  1  2  1  9   3.8137     430
  3  1  1  9 -1  1  0  4  2  1 14   3.8137     430
  4  1  1  9  1  0  0  3  2  1 14   3.8137     430
  1  2  1  9  1 -1  0  2  1  1 14   3.8137     431
  1  2  1 14  1  0  0  2  1  1  9   3.8137     431
  2  2  1 14 -1  1  0  1  1  1  9   3.8137     431
  3  2  1 14 -1  0  0  4  1  1  9   3.8137     431
  4  2  1 14  1 -1  0  3  1  1  9   3.8137     431
  1  2  1  9  1 -1  0  2  2  1 14   3.8137     432
  2  2  1 14 -1  1  0  1  2  1  9   3.8137     432
  3  2  1  9 -1  1  0  4  2  1 14   3.8137     432
  4  2  1 14  1 -1  0  3  2  1  9   3.8137     432
  1  1  1 14  1  0  0  2  2  1  9   3.8137     430
  3  1  1 14 -1  0  0  4  2  1  9   3.8137     430
  2  2  1  9 -1  0  0  1  1  1 14   3.8137     431
  4  2  1  9  1  0  0  3  1  1 14   3.8137     431
  1  2  1 14  1  0  0  2  2  1  9   3.8137     432
  2  2  1  9 -1  0  0  1  2  1 14   3.8137     432
  3  2  1 14 -1  0  0  4  2  1  9   3.8137     432
  4  2  1  9  1  0  0  3  2  1 14   3.8137     432
  2  1  1 15 -1  1  0  4  1  1  3   3.8197     433
  4  1  1  3  1 -1  0  2  1  1 15   3.8197     433
  2  1  1 15 -1  1  0  4  2  1  3   3.8197     434
  4  1  1  3  1 -1  0  2  2  1 15   3.8197     434
  2  2  1 15 -1  1  0  4  1  1  3   3.8197     435
  4  2  1  3  1 -1  0  2  1  1 15   3.8197     435
  2  2  1  3 -1  1  0  4  2  1 15   3.8197     436
  2  2  1 15 -1  1  0  4  2  1  3   3.8197     436
  4  2  1  3  1 -1  0  2  2  1 15   3.8197     436
  4  2  1 15  1 -1  0  2  2  1  3   3.8197     436
  1  1  1  3  1  0  1  3  2  1 15   3.8197     434
  1  1  1 15  1  0  1  3  2  1  3   3.8197     434
  2  1  1  3 -1  1  0  4  2  1 15   3.8197     434
  4  1  1 15  1 -1  0  2  2  1  3   3.8197     434
  2  2  1  3 -1  1  0  4  1  1 15   3.8197     435
  3  2  1  3 -1  0 -1  1  1  1 15   3.8197     435
  3  2  1 15 -1  0 -1  1  1  1  3   3.8197     435
  4  2  1 15  1 -1  0  2  1  1  3   3.8197     435
  1  2  1  3  1  0  1  3  2  1 15   3.8197     436
  1  2  1 15  1  0  1  3  2  1  3   3.8197     436
  3  2  1  3 -1  0 -1  1  2  1 15   3.8197     436
  3  2  1 15 -1  0 -1  1  2  1  3   3.8197     436
  1  1  1  3  1  0  1  3  1  1 15   3.8197     433
  1  1  1 15  1  0  1  3  1  1  3   3.8197     433
  2  1  1  3 -1  1  0  4  1  1 15   3.8197     433
  3  1  1  3 -1  0 -1  1  1  1 15   3.8197     433
  3  1  1 15 -1  0 -1  1  1  1  3   3.8197     433
  4  1  1 15  1 -1  0  2  1  1  3   3.8197     433
  3  1  1  3 -1  0 -1  1  2  1 15   3.8197     434
  3  1  1 15 -1  0 -1  1  2  1  3   3.8197     434
  1  2  1  3  1  0  1  3  1  1 15   3.8197     435
  1  2  1 15  1  0  1  3  1  1  3   3.8197     435
  3  1  1 12  0  0  0  2  2  1 20   3.8227     434
  4  1  1 12  0  0 -1  1  2  1 20   3.8227     434
  1  2  1 20  0  0  1  4  1  1 12   3.8227     435
  2  2  1 20  0  0  0  3  1  1 12   3.8227     435
  2  2  1 20  0  0  0  3  2  1 12   3.8227     436
  3  2  1 12  0  0  0  2  2  1 20   3.8227     436
  1  1  1 12  0  0  0  4  2  1 20   3.8227     434
  4  2  1 20  0  0  0  1  1  1 12   3.8227     435
  1  2  1 12  0  0  0  4  2  1 20   3.8227     436
  1  2  1 20  0  0  1  4  2  1 12   3.8227     436
  4  2  1 12  0  0 -1  1  2  1 20   3.8227     436
  4  2  1 20  0  0  0  1  2  1 12   3.8227     436
  3  2  1 20  0  0 -1  2  1  1 12   3.8227     435
  2  1  1 12  0  0  1  3  2  1 20   3.8227     434
  2  2  1 12  0  0  1  3  2  1 20   3.8227     436
  3  2  1 20  0  0 -1  2  2  1 12   3.8227     436
  3  1  1 13  0  0  0  2  2  1 20   3.8235     434
  2  2  1 20  0  0  0  3  1  1 13   3.8235     435
  4  1  1 13  0  0 -1  1  2  1 20   3.8235     434
  1  2  1 20  0  0  1  4  1  1 13   3.8235     435
  2  2  1 20  0  0  0  3  2  1 13   3.8235     436
  3  2  1 13  0  0  0  2  2  1 20   3.8235     436
  1  1  1 13  0  0  0  4  2  1 20   3.8235     434
  2  1  1 13  0  0  1  3  2  1 20   3.8235     434
  3  2  1 20  0  0 -1  2  1  1 13   3.8235     435
  4  2  1 20  0  0  0  1  1  1 13   3.8235     435
  1  2  1 13  0  0  0  4  2  1 20   3.8235     436
  1  2  1 20  0  0  1  4  2  1 13   3.8235     436
  2  2  1 13  0  0  1  3  2  1 20   3.8235     436
  3  2  1 20  0  0 -1  2  2  1 13   3.8235     436
  4  2  1 13  0  0 -1  1  2  1 20   3.8235     436
  4  2  1 20  0  0  0  1  2  1 13   3.8235     436
  1  1  1 26  1 -1  0  2  2  1 21   3.8264     438
  4  1  1 26  1  0  0  3  2  1 21   3.8264     438
  2  2  1 21 -1  1  0  1  1  1 26   3.8264     439
  3  2  1 21 -1  0  0  4  1  1 26   3.8264     439
  2  1  1 26 -1  0  0  1  2  1 21   3.8264     438
  3  1  1 26 -1  1  0  4  2  1 21   3.8264     438
  1  2  1 21  1  0  0  2  1  1 26   3.8264     439
  4  2  1 21  1 -1  0  3  1  1 26   3.8264     439
  2  1  1 18 -1  1  0  4  1  1 24   3.8279     437
  4  1  1 24  1 -1  0  2  1  1 18   3.8279     437
  2  1  1 18 -1  1  0  4  2  1 24   3.8279     438
  4  1  1 24  1 -1  0  2  2  1 18   3.8279     438
  2  2  1 18 -1  1  0  4  1  1 24   3.8279     439
  4  2  1 24  1 -1  0  2  1  1 18   3.8279     439
  2  2  1 18 -1  1  0  4  2  1 24   3.8279     440
  2  2  1 24 -1  1  0  4  2  1 18   3.8279     440
  4  2  1 18  1 -1  0  2  2  1 24   3.8279     440
  4  2  1 24  1 -1  0  2  2  1 18   3.8279     440
  1  1  1 18  1  0  1  3  2  1 24   3.8279     438
  1  1  1 24  1  0  1  3  2  1 18   3.8279     438
  4  1  1 18  1 -1  0  2  2  1 24   3.8279     438
  2  2  1 24 -1  1  0  4  1  1 18   3.8279     439
  3  2  1 18 -1  0 -1  1  1  1 24   3.8279     439
  3  2  1 24 -1  0 -1  1  1  1 18   3.8279     439
  1  2  1 18  1  0  1  3  2  1 24   3.8279     440
  1  2  1 24  1  0  1  3  2  1 18   3.8279     440
  3  2  1 18 -1  0 -1  1  2  1 24   3.8279     440
  3  2  1 24 -1  0 -1  1  2  1 18   3.8279     440
  1  1  1 18  1  0  1  3  1  1 24   3.8279     437
  2  1  1 24 -1  1  0  4  1  1 18   3.8279     437
  3  1  1 24 -1  0 -1  1  1  1 18   3.8279     437
  4  1  1 18  1 -1  0  2  1  1 24   3.8279     437
  2  1  1 24 -1  1  0  4  2  1 18   3.8279     438
  3  1  1 24 -1  0 -1  1  2  1 18   3.8279     438
  1  2  1 18  1  0  1  3  1  1 24   3.8279     439
  4  2  1 18  1 -1  0  2  1  1 24   3.8279     439
  1  1  1 24  1  0  1  3  1  1 18   3.8279     437
  3  1  1 18 -1  0 -1  1  1  1 24   3.8279     437
  3  1  1 18 -1  0 -1  1  2  1 24   3.8279     438
  1  2  1 24  1  0  1  3  1  1 18   3.8279     439
  2  1  1  9 -1  1  0  4  1  1  3   3.8299     437
  4  1  1  3  1 -1  0  2  1  1  9   3.8299     437
  4  1  1  3  1 -1  0  2  2  1  9   3.8299     438
  2  2  1  9 -1  1  0  4  1  1  3   3.8299     439
  2  2  1  3 -1  1  0  4  2  1  9   3.8299     440
  2  2  1  9 -1  1  0  4  2  1  3   3.8299     440
  4  2  1  3  1 -1  0  2  2  1  9   3.8299     440
  4  2  1  9  1 -1  0  2  2  1  3   3.8299     440
  1  1  1  3  1  0  1  3  1  1  9   3.8299     437
  3  1  1  9 -1  0 -1  1  1  1  3   3.8299     437
  1  1  1  9  1  0  1  3  2  1  3   3.8299     438
  2  1  1  3 -1  1  0  4  2  1  9   3.8299     438
  2  1  1  9 -1  1  0  4  2  1  3   3.8299     438
  3  1  1  9 -1  0 -1  1  2  1  3   3.8299     438
  4  1  1  9  1 -1  0  2  2  1  3   3.8299     438
  1  2  1  3  1  0  1  3  1  1  9   3.8299     439
  2  2  1  3 -1  1  0  4  1  1  9   3.8299     439
  3  2  1  3 -1  0 -1  1  1  1  9   3.8299     439
  4  2  1  3  1 -1  0  2  1  1  9   3.8299     439
  4  2  1  9  1 -1  0  2  1  1  3   3.8299     439
  1  2  1  9  1  0  1  3  2  1  3   3.8299     440
  3  2  1  3 -1  0 -1  1  2  1  9   3.8299     440
  1  1  1  9  1  0  1  3  1  1  3   3.8299     437
  2  1  1  3 -1  1  0  4  1  1  9   3.8299     437
  3  1  1  3 -1  0 -1  1  1  1  9   3.8299     437
  4  1  1  9  1 -1  0  2  1  1  3   3.8299     437
  1  1  1  3  1  0  1  3  2  1  9   3.8299     438
  3  1  1  3 -1  0 -1  1  2  1  9   3.8299     438
  1  2  1  9  1  0  1  3  1  1  3   3.8299     439
  3  2  1  9 -1  0 -1  1  1  1  3   3.8299     439
  1  2  1  3  1  0  1  3  2  1  9   3.8299     440
  3  2  1  9 -1  0 -1  1  2  1  3   3.8299     440
  2  2  1  9 -1  1  0  4  2  1 21   3.8311     440
  4  2  1 21  1 -1  0  2  2  1  9   3.8311     440
  1  1  1  9  1  0  1  3  2  1 21   3.8311     438
  2  1  1  9 -1  1  0  4  2  1 21   3.8311     438
  3  2  1 21 -1  0 -1  1  1  1  9   3.8311     439
  4  2  1 21  1 -1  0  2  1  1  9   3.8311     439
  1  2  1  9  1  0  1  3  2  1 21   3.8311     440
  2  2  1 21 -1  1  0  4  2  1  9   3.8311     440
  3  2  1 21 -1  0 -1  1  2  1  9   3.8311     440
  4  2  1  9  1 -1  0  2  2  1 21   3.8311     440
  3  1  1  9 -1  0 -1  1  2  1 21   3.8311     438
  4  1  1  9  1 -1  0  2  2  1 21   3.8311     438
  2  2  1 21 -1  1  0  4  1  1  9   3.8311     439
  1  2  1 21  1  0  1  3  2  1  9   3.8311     440
  3  2  1  9 -1  0 -1  1  2  1 21   3.8311     440
  1  2  1 21  1  0  1  3  1  1  9   3.8311     439
  2  1  1  6 -1  0  0  3  1  1 16   3.8364     441
  3  1  1 16  1  0  0  2  1  1  6   3.8364     441
  1  1  1  6  1  0  1  4  2  1 16   3.8364     442
  2  1  1  6 -1  0  0  3  2  1 16   3.8364     442
  3  1  1 16  1  0  0  2  2  1  6   3.8364     442
  2  2  1  6 -1  0  0  3  1  1 16   3.8364     443
  3  2  1 16  1  0  0  2  1  1  6   3.8364     443
  4  2  1 16 -1  0 -1  1  1  1  6   3.8364     443
  1  2  1  6  1  0  1  4  2  1 16   3.8364     444
  2  2  1  6 -1  0  0  3  2  1 16   3.8364     444
  3  2  1 16  1  0  0  2  2  1  6   3.8364     444
  4  2  1 16 -1  0 -1  1  2  1  6   3.8364     444
  1  1  1  6  1  0  1  4  1  1 16   3.8364     441
  1  1  1 16 -1  0  0  4  1  1  6   3.8364     441
  4  1  1  6  1  0  0  1  1  1 16   3.8364     441
  4  1  1 16 -1  0 -1  1  1  1  6   3.8364     441
  1  1  1 16 -1  0  0  4  2  1  6   3.8364     442
  2  1  1 16  1  0  1  3  2  1  6   3.8364     442
  4  1  1  6  1  0  0  1  2  1 16   3.8364     442
  4  1  1 16 -1  0 -1  1  2  1  6   3.8364     442
  1  2  1  6  1  0  1  4  1  1 16   3.8364     443
  1  2  1 16 -1  0  0  4  1  1  6   3.8364     443
  3  2  1  6 -1  0 -1  2  1  1 16   3.8364     443
  4  2  1  6  1  0  0  1  1  1 16   3.8364     443
  1  2  1 16 -1  0  0  4  2  1  6   3.8364     444
  4  2  1  6  1  0  0  1  2  1 16   3.8364     444
  2  1  1 16  1  0  1  3  1  1  6   3.8364     441
  3  1  1  6 -1  0 -1  2  1  1 16   3.8364     441
  3  1  1  6 -1  0 -1  2  2  1 16   3.8364     442
  2  2  1 16  1  0  1  3  1  1  6   3.8364     443
  2  2  1 16  1  0  1  3  2  1  6   3.8364     444
  3  2  1  6 -1  0 -1  2  2  1 16   3.8364     444
  4  1  1 24  0  0  0  1  2  1 26   3.8371     442
  1  2  1 26  0  0  0  4  1  1 24   3.8371     443
  1  2  1 26  0  0  0  4  2  1 24   3.8371     444
  2  2  1 26  0  0  1  3  2  1 24   3.8371     444
  3  2  1 24  0  0 -1  2  2  1 26   3.8371     444
  4  2  1 24  0  0  0  1  2  1 26   3.8371     444
  1  1  1 24  0  0  1  4  2  1 26   3.8371     442
  3  1  1 24  0  0 -1  2  2  1 26   3.8371     442
  2  2  1 26  0  0  1  3  1  1 24   3.8371     443
  4  2  1 26  0  0 -1  1  1  1 24   3.8371     443
  1  2  1 24  0  0  1  4  2  1 26   3.8371     444
  4  2  1 26  0  0 -1  1  2  1 24   3.8371     444
  2  1  1 24  0  0  0  3  2  1 26   3.8371     442
  3  2  1 26  0  0  0  2  1  1 24   3.8371     443
  2  2  1 24  0  0  0  3  2  1 26   3.8371     444
  3  2  1 26  0  0  0  2  2  1 24   3.8371     444
  3  1  1 12  0  0  0  4  2  1 20   3.8384     442
  4  2  1 20  0  0  0  3  1  1 12   3.8384     443
  3  2  1 20  0  1  0  4  2  1 12   3.8384     444
  4  2  1 12  0 -1  0  3  2  1 20   3.8384     444
  2  1  1 12  0  1  0  1  2  1 20   3.8385     442
  4  1  1 12  0 -1  0  3  2  1 20   3.8385     442
  1  2  1 20  0 -1  0  2  1  1 12   3.8385     443
  3  2  1 20  0  1  0  4  1  1 12   3.8385     443
  3  2  1 12  0  0  0  4  2  1 20   3.8385     444
  4  2  1 20  0  0  0  3  2  1 12   3.8385     444
  1  1  1 12  0  0  0  2  2  1 20   3.8385     442
  2  2  1 20  0  0  0  1  1  1 12   3.8385     443
  1  2  1 12  0  0  0  2  2  1 20   3.8385     444
  1  2  1 20  0 -1  0  2  2  1 12   3.8385     444
  2  2  1 12  0  1  0  1  2  1 20   3.8385     444
  2  2  1 20  0  0  0  1  2  1 12   3.8385     444
  2  1  1 17 -1  1  0  4  1  1 23   3.8404     441
  4  1  1 23  1 -1  0  2  1  1 17   3.8404     441
  4  1  1 23  1 -1  0  2  2  1 17   3.8404     442
  2  2  1 17 -1  1  0  4  1  1 23   3.8404     443
  2  1  1 17 -1  1  0  4  2  1 23   3.8404     442
  4  2  1 23  1 -1  0  2  1  1 17   3.8404     443
  2  2  1 17 -1  1  0  4  2  1 23   3.8404     444
  4  2  1 23  1 -1  0  2  2  1 17   3.8404     444
  1  1  1 17  1  0  1  3  2  1 23   3.8404     442
  3  2  1 23 -1  0 -1  1  1  1 17   3.8404     443
  1  2  1 17  1  0  1  3  2  1 23   3.8404     444
  2  2  1 23 -1  1  0  4  2  1 17   3.8404     444
  3  2  1 23 -1  0 -1  1  2  1 17   3.8404     444
  4  2  1 17  1 -1  0  2  2  1 23   3.8404     444
  1  1  1 17  1  0  1  3  1  1 23   3.8404     441
  3  1  1 23 -1  0 -1  1  1  1 17   3.8404     441
  1  1  1 23  1  0  1  3  2  1 17   3.8404     442
  3  1  1 23 -1  0 -1  1  2  1 17   3.8404     442
  1  2  1 17  1  0  1  3  1  1 23   3.8404     443
  3  2  1 17 -1  0 -1  1  1  1 23   3.8404     443
  1  2  1 23  1  0  1  3  2  1 17   3.8404     444
  3  2  1 17 -1  0 -1  1  2  1 23   3.8404     444
  1  1  1 23  1  0  1  3  1  1 17   3.8404     441
  3  1  1 17 -1  0 -1  1  1  1 23   3.8404     441
  2  1  1 23 -1  1  0  4  2  1 17   3.8404     442
  3  1  1 17 -1  0 -1  1  2  1 23   3.8404     442
  4  1  1 17  1 -1  0  2  2  1 23   3.8404     442
  1  2  1 23  1  0  1  3  1  1 17   3.8404     443
  2  2  1 23 -1  1  0  4  1  1 17   3.8404     443
  4  2  1 17  1 -1  0  2  1  1 23   3.8404     443
  2  1  1 23 -1  1  0  4  1  1 17   3.8404     441
  4  1  1 17  1 -1  0  2  1  1 23   3.8404     441
  2  1  1 13 -1  1  0  4  1  1  6   3.8440     445
  4  1  1  6  1 -1  0  2  1  1 13   3.8440     445
  2  1  1 13 -1  1  0  4  2  1  6   3.8440     446
  4  1  1  6  1 -1  0  2  2  1 13   3.8440     446
  2  2  1 13 -1  1  0  4  1  1  6   3.8440     447
  4  2  1  6  1 -1  0  2  1  1 13   3.8440     447
  2  2  1  6 -1  1  0  4  2  1 13   3.8440     448
  2  2  1 13 -1  1  0  4  2  1  6   3.8440     448
  4  2  1  6  1 -1  0  2  2  1 13   3.8440     448
  4  2  1 13  1 -1  0  2  2  1  6   3.8440     448
  3  1  1  6 -1  0 -1  1  1  1 13   3.8440     445
  1  1  1  6  1  0  1  3  2  1 13   3.8440     446
  1  1  1 13  1  0  1  3  2  1  6   3.8440     446
  2  1  1  6 -1  1  0  4  2  1 13   3.8440     446
  3  1  1  6 -1  0 -1  1  2  1 13   3.8440     446
  4  1  1 13  1 -1  0  2  2  1  6   3.8440     446
  2  2  1  6 -1  1  0  4  1  1 13   3.8440     447
  3  2  1  6 -1  0 -1  1  1  1 13   3.8440     447
  3  2  1 13 -1  0 -1  1  1  1  6   3.8440     447
  4  2  1 13  1 -1  0  2  1  1  6   3.8440     447
  1  2  1  6  1  0  1  3  2  1 13   3.8440     448
  1  2  1 13  1  0  1  3  2  1  6   3.8440     448
  3  2  1  6 -1  0 -1  1  2  1 13   3.8440     448
  3  2  1 13 -1  0 -1  1  2  1  6   3.8440     448
  1  1  1  6  1  0  1  3  1  1 13   3.8440     445
  1  1  1 13  1  0  1  3  1  1  6   3.8440     445
  2  1  1  6 -1  1  0  4  1  1 13   3.8440     445
  3  1  1 13 -1  0 -1  1  1  1  6   3.8440     445
  4  1  1 13  1 -1  0  2  1  1  6   3.8440     445
  3  1  1 13 -1  0 -1  1  2  1  6   3.8440     446
  1  2  1  6  1  0  1  3  1  1 13   3.8440     447
  1  2  1 13  1  0  1  3  1  1  6   3.8440     447
  1  1  1 10  0  0  0  4  2  1 25   3.8483     446
  3  1  1 10  0  0  0  2  2  1 25   3.8483     446
  2  2  1 25  0  0  0  3  1  1 10   3.8483     447
  4  2  1 25  0  0  0  1  1  1 10   3.8483     447
  1  2  1 10  0  0  0  4  2  1 25   3.8483     448
  2  2  1 25  0  0  0  3  2  1 10   3.8483     448
  3  2  1 10  0  0  0  2  2  1 25   3.8483     448
  4  2  1 25  0  0  0  1  2  1 10   3.8483     448
  1  1  1 10  0  0  0  4  1  1 25   3.8483     445
  1  1  1 25  0  0  1  4  1  1 10   3.8483     445
  2  1  1 25  0  0  0  3  1  1 10   3.8483     445
  3  1  1 10  0  0  0  2  1  1 25   3.8483     445
  4  1  1 10  0  0 -1  1  1  1 25   3.8483     445
  4  1  1 25  0  0  0  1  1  1 10   3.8483     445
  2  1  1 25  0  0  0  3  2  1 10   3.8483     446
  4  1  1 10  0  0 -1  1  2  1 25   3.8483     446
  4  1  1 25  0  0  0  1  2  1 10   3.8483     446
  1  2  1 10  0  0  0  4  1  1 25   3.8483     447
  1  2  1 25  0  0  1  4  1  1 10   3.8483     447
  3  2  1 10  0  0  0  2  1  1 25   3.8483     447
  2  1  1 10  0  0  1  3  1  1 25   3.8483     445
  3  1  1 25  0  0 -1  2  1  1 10   3.8483     445
  1  1  1 25  0  0  1  4  2  1 10   3.8483     446
  2  1  1 10  0  0  1  3  2  1 25   3.8483     446
  3  2  1 25  0  0 -1  2  1  1 10   3.8483     447
  4  2  1 10  0  0 -1  1  1  1 25   3.8483     447
  1  2  1 25  0  0  1  4  2  1 10   3.8483     448
  2  2  1 10  0  0  1  3  2  1 25   3.8483     448
  3  2  1 25  0  0 -1  2  2  1 10   3.8483     448
  4  2  1 10  0  0 -1  1  2  1 25   3.8483     448
  3  1  1 25  0  0 -1  2  2  1 10   3.8483     446
  2  2  1 10  0  0  1  3  1  1 25   3.8483     447
  1  2  1 20  1 -1  0  2  2  1 28   3.8502     452
  2  2  1 28 -1  1  0  1  2  1 20   3.8502     452
  3  2  1 20 -1  1  0  4  2  1 28   3.8502     452
  4  2  1 28  1 -1  0  3  2  1 20   3.8502     452
  1  2  1 28  1  0  0  2  2  1 20   3.8503     452
  2  2  1 20 -1  0  0  1  2  1 28   3.8503     452
  3  2  1 28 -1  0  0  4  2  1 20   3.8503     452
  4  2  1 20  1  0  0  3  2  1 28   3.8503     452
  2  1  1 12 -1  1  0  4  1  1  5   3.8505     449
  4  1  1  5  1 -1  0  2  1  1 12   3.8505     449
  4  1  1  5  1 -1  0  2  2  1 12   3.8505     450
  2  2  1 12 -1  1  0  4  1  1  5   3.8505     451
  1  1  1 12  1  0  1  3  2  1  5   3.8505     450
  2  1  1 12 -1  1  0  4  2  1  5   3.8505     450
  3  2  1  5 -1  0 -1  1  1  1 12   3.8505     451
  4  2  1  5  1 -1  0  2  1  1 12   3.8505     451
  1  2  1 12  1  0  1  3  2  1  5   3.8505     452
  2  2  1  5 -1  1  0  4  2  1 12   3.8505     452
  2  2  1 12 -1  1  0  4  2  1  5   3.8505     452
  3  2  1  5 -1  0 -1  1  2  1 12   3.8505     452
  4  2  1  5  1 -1  0  2  2  1 12   3.8505     452
  4  2  1 12  1 -1  0  2  2  1  5   3.8505     452
  1  1  1  5  1  0  1  3  1  1 12   3.8505     449
  1  1  1 12  1  0  1  3  1  1  5   3.8505     449
  3  1  1  5 -1  0 -1  1  1  1 12   3.8505     449
  3  1  1 12 -1  0 -1  1  1  1  5   3.8505     449
  1  1  1  5  1  0  1  3  2  1 12   3.8505     450
  2  1  1  5 -1  1  0  4  2  1 12   3.8505     450
  3  1  1  5 -1  0 -1  1  2  1 12   3.8505     450
  3  1  1 12 -1  0 -1  1  2  1  5   3.8505     450
  4  1  1 12  1 -1  0  2  2  1  5   3.8505     450
  1  2  1  5  1  0  1  3  1  1 12   3.8505     451
  1  2  1 12  1  0  1  3  1  1  5   3.8505     451
  2  2  1  5 -1  1  0  4  1  1 12   3.8505     451
  3  2  1 12 -1  0 -1  1  1  1  5   3.8505     451
  4  2  1 12  1 -1  0  2  1  1  5   3.8505     451
  1  2  1  5  1  0  1  3  2  1 12   3.8505     452
  3  2  1 12 -1  0 -1  1  2  1  5   3.8505     452
  2  1  1  5 -1  1  0  4  1  1 12   3.8506     449
  4  1  1 12  1 -1  0  2  1  1  5   3.8506     449
  2  1  1  7  0  0  0  3  1  1 19   3.8542     449
  3  1  1 19  0  0  0  2  1  1  7   3.8542     449
  1  1  1 19  0  0  0  4  2  1  7   3.8542     450
  2  1  1 19  0  0  1  3  2  1  7   3.8542     450
  3  1  1 19  0  0  0  2  2  1  7   3.8542     450
  2  2  1  7  0  0  0  3  1  1 19   3.8542     451
  3  2  1  7  0  0 -1  2  1  1 19   3.8542     451
  4  2  1  7  0  0  0  1  1  1 19   3.8542     451
  1  2  1 19  0  0  0  4  2  1  7   3.8542     452
  2  2  1 19  0  0  1  3  2  1  7   3.8542     452
  3  2  1  7  0  0 -1  2  2  1 19   3.8542     452
  4  2  1  7  0  0  0  1  2  1 19   3.8542     452
  1  1  1  7  0  0  1  4  1  1 19   3.8542     449
  1  1  1 19  0  0  0  4  1  1  7   3.8542     449
  2  1  1 19  0  0  1  3  1  1  7   3.8542     449
  3  1  1  7  0  0 -1  2  1  1 19   3.8542     449
  4  1  1  7  0  0  0  1  1  1 19   3.8542     449
  4  1  1 19  0  0 -1  1  1  1  7   3.8542     449
  1  1  1  7  0  0  1  4  2  1 19   3.8542     450
  3  1  1  7  0  0 -1  2  2  1 19   3.8542     450
  4  1  1  7  0  0  0  1  2  1 19   3.8542     450
  4  1  1 19  0  0 -1  1  2  1  7   3.8542     450
  1  2  1  7  0  0  1  4  1  1 19   3.8542     451
  1  2  1 19  0  0  0  4  1  1  7   3.8542     451
  2  2  1 19  0  0  1  3  1  1  7   3.8542     451
  4  2  1 19  0  0 -1  1  1  1  7   3.8542     451
  1  2  1  7  0  0  1  4  2  1 19   3.8542     452
  4  2  1 19  0  0 -1  1  2  1  7   3.8542     452
  2  1  1  7  0  0  0  3  2  1 19   3.8542     450
  3  2  1 19  0  0  0  2  1  1  7   3.8542     451
  2  2  1  7  0  0  0  3  2  1 19   3.8542     452
  3  2  1 19  0  0  0  2  2  1  7   3.8542     452
  4  1  1 19  1 -1  0  2  2  1 25   3.8600     454
  2  2  1 25 -1  1  0  4  1  1 19   3.8600     455
  2  2  1 25 -1  1  0  4  2  1 19   3.8600     456
  4  2  1 19  1 -1  0  2  2  1 25   3.8600     456
  2  1  1 25 -1  1  0  4  1  1 19   3.8600     453
  4  1  1 19  1 -1  0  2  1  1 25   3.8600     453
  1  1  1 25  1  0  1  3  2  1 19   3.8600     454
  2  1  1 25 -1  1  0  4  2  1 19   3.8600     454
  3  2  1 19 -1  0 -1  1  1  1 25   3.8600     455
  4  2  1 19  1 -1  0  2  1  1 25   3.8600     455
  1  2  1 25  1  0  1  3  2  1 19   3.8600     456
  2  2  1 19 -1  1  0  4  2  1 25   3.8600     456
  3  2  1 19 -1  0 -1  1  2  1 25   3.8600     456
  4  2  1 25  1 -1  0  2  2  1 19   3.8600     456
  1  1  1 19  1  0  1  3  1  1 25   3.8600     453
  2  1  1 19 -1  1  0  4  1  1 25   3.8600     453
  3  1  1 25 -1  0 -1  1  1  1 19   3.8600     453
  4  1  1 25  1 -1  0  2  1  1 19   3.8600     453
  1  1  1 19  1  0  1  3  2  1 25   3.8600     454
  2  1  1 19 -1  1  0  4  2  1 25   3.8600     454
  3  1  1 25 -1  0 -1  1  2  1 19   3.8600     454
  4  1  1 25  1 -1  0  2  2  1 19   3.8600     454
  1  2  1 19  1  0  1  3  1  1 25   3.8600     455
  2  2  1 19 -1  1  0  4  1  1 25   3.8600     455
  3  2  1 25 -1  0 -1  1  1  1 19   3.8600     455
  4  2  1 25  1 -1  0  2  1  1 19   3.8600     455
  1  2  1 19  1  0  1  3  2  1 25   3.8600     456
  3  2  1 25 -1  0 -1  1  2  1 19   3.8600     456
  1  1  1 25  1  0  1  3  1  1 19   3.8600     453
  3  1  1 19 -1  0 -1  1  1  1 25   3.8600     453
  3  1  1 19 -1  0 -1  1  2  1 25   3.8600     454
  1  2  1 25  1  0  1  3  1  1 19   3.8600     455
  4  1  1 14  1 -1  0  2  2  1  7   3.8605     454
  2  2  1  7 -1  1  0  4  1  1 14   3.8605     455
  2  2  1  7 -1  1  0  4  2  1 14   3.8605     456
  4  2  1 14  1 -1  0  2  2  1  7   3.8605     456
  2  1  1  7 -1  1  0  4  1  1 14   3.8605     453
  2  1  1 14 -1  1  0  4  1  1  7   3.8605     453
  4  1  1  7  1 -1  0  2  1  1 14   3.8605     453
  4  1  1 14  1 -1  0  2  1  1  7   3.8605     453
  1  1  1  7  1  0  1  3  2  1 14   3.8605     454
  1  1  1 14  1  0  1  3  2  1  7   3.8605     454
  2  1  1  7 -1  1  0  4  2  1 14   3.8605     454
  2  1  1 14 -1  1  0  4  2  1  7   3.8605     454
  4  1  1  7  1 -1  0  2  2  1 14   3.8605     454
  2  2  1 14 -1  1  0  4  1  1  7   3.8605     455
  3  2  1  7 -1  0 -1  1  1  1 14   3.8605     455
  3  2  1 14 -1  0 -1  1  1  1  7   3.8605     455
  4  2  1  7  1 -1  0  2  1  1 14   3.8605     455
  4  2  1 14  1 -1  0  2  1  1  7   3.8605     455
  1  2  1  7  1  0  1  3  2  1 14   3.8605     456
  1  2  1 14  1  0  1  3  2  1  7   3.8605     456
  2  2  1 14 -1  1  0  4  2  1  7   3.8605     456
  3  2  1  7 -1  0 -1  1  2  1 14   3.8605     456
  3  2  1 14 -1  0 -1  1  2  1  7   3.8605     456
  4  2  1  7  1 -1  0  2  2  1 14   3.8605     456
  1  1  1  7  1  0  1  3  1  1 14   3.8606     453
  1  1  1 14  1  0  1  3  1  1  7   3.8606     453
  3  1  1  7 -1  0 -1  1  1  1 14   3.8606     453
  3  1  1 14 -1  0 -1  1  1  1  7   3.8606     453
  3  1  1  7 -1  0 -1  1  2  1 14   3.8606     454
  3  1  1 14 -1  0 -1  1  2  1  7   3.8606     454
  1  2  1  7  1  0  1  3  1  1 14   3.8606     455
  1  2  1 14  1  0  1  3  1  1  7   3.8606     455
  3  1  1 12  0  0  0  4  1  1 20   3.8676     457
  4  1  1 20  0  0  0  3  1  1 12   3.8676     457
  3  1  1 20  0  1  0  4  2  1 12   3.8676     458
  4  1  1 20  0  0  0  3  2  1 12   3.8676     458
  3  2  1 12  0  0  0  4  1  1 20   3.8676     459
  4  2  1 12  0 -1  0  3  1  1 20   3.8676     459
  1  1  1 12  0  0  0  2  1  1 20   3.8676     457
  1  1  1 20  0 -1  0  2  1  1 12   3.8676     457
  2  1  1 12  0  1  0  1  1  1 20   3.8676     457
  2  1  1 20  0  0  0  1  1  1 12   3.8676     457
  3  1  1 20  0  1  0  4  1  1 12   3.8676     457
  4  1  1 12  0 -1  0  3  1  1 20   3.8676     457
  1  1  1 20  0 -1  0  2  2  1 12   3.8676     458
  2  1  1 20  0  0  0  1  2  1 12   3.8676     458
  1  2  1 12  0  0  0  2  1  1 20   3.8676     459
  2  2  1 12  0  1  0  1  1  1 20   3.8676     459
  1  1  1 19  1  0  0  2  1  1 25   3.8706     457
  1  1  1 25  1 -1  0  2  1  1 19   3.8706     457
  2  1  1 19 -1  1  0  1  1  1 25   3.8706     457
  2  1  1 25 -1  0  0  1  1  1 19   3.8706     457
  3  1  1 19 -1  0  0  4  1  1 25   3.8706     457
  3  1  1 25 -1  1  0  4  1  1 19   3.8706     457
  4  1  1 19  1 -1  0  3  1  1 25   3.8706     457
  4  1  1 25  1  0  0  3  1  1 19   3.8706     457
  1  1  1 25  1 -1  0  2  2  1 19   3.8706     458
  2  1  1 19 -1  1  0  1  2  1 25   3.8706     458
  2  1  1 25 -1  0  0  1  2  1 19   3.8706     458
  3  1  1 19 -1  0  0  4  2  1 25   3.8706     458
  3  1  1 25 -1  1  0  4  2  1 19   3.8706     458
  4  1  1 19  1 -1  0  3  2  1 25   3.8706     458
  1  2  1 19  1  0  0  2  1  1 25   3.8706     459
  1  2  1 25  1 -1  0  2  1  1 19   3.8706     459
  2  2  1 19 -1  1  0  1  1  1 25   3.8706     459
  3  2  1 25 -1  1  0  4  1  1 19   3.8706     459
  4  2  1 19  1 -1  0  3  1  1 25   3.8706     459
  4  2  1 25  1  0  0  3  1  1 19   3.8706     459
  1  2  1 25  1 -1  0  2  2  1 19   3.8706     460
  2  2  1 19 -1  1  0  1  2  1 25   3.8706     460
  3  2  1 25 -1  1  0  4  2  1 19   3.8706     460
  4  2  1 19  1 -1  0  3  2  1 25   3.8706     460
  1  1  1 19  1  0  0  2  2  1 25   3.8706     458
  4  1  1 25  1  0  0  3  2  1 19   3.8706     458
  2  2  1 25 -1  0  0  1  1  1 19   3.8706     459
  3  2  1 19 -1  0  0  4  1  1 25   3.8706     459
  1  2  1 19  1  0  0  2  2  1 25   3.8706     460
  2  2  1 25 -1  0  0  1  2  1 19   3.8706     460
  3  2  1 19 -1  0  0  4  2  1 25   3.8706     460
  4  2  1 25  1  0  0  3  2  1 19   3.8706     460
  2  1  1  5 -1  0  0  2  1  1 20   3.8723     457
  2  1  1 20  1  0  0  2  1  1  5   3.8723     457
  1  1  1  5  1  0  0  1  1  1 20   3.8723     457
  1  1  1 20 -1  0  0  1  1  1  5   3.8723     457
  3  1  1  5 -1  0  0  3  1  1 20   3.8723     457
  3  1  1 20  1  0  0  3  1  1  5   3.8723     457
  1  1  1 20 -1  0  0  1  2  1  5   3.8723     458
  2  1  1 20  1  0  0  2  2  1  5   3.8723     458
  1  2  1  5  1  0  0  1  1  1 20   3.8723     459
  2  2  1  5 -1  0  0  2  1  1 20   3.8723     459
  3  1  1 20  1  0  0  3  2  1  5   3.8723     458
  3  2  1  5 -1  0  0  3  1  1 20   3.8723     459
  4  1  1  5  1  0  0  4  1  1 20   3.8723     457
  4  1  1 20 -1  0  0  4  1  1  5   3.8723     457
  4  1  1 20 -1  0  0  4  2  1  5   3.8723     458
  4  2  1  5  1  0  0  4  1  1 20   3.8723     459
  2  2  1 17  1  0  0  2  2  1 28   3.8730     464
  2  2  1 28 -1  0  0  2  2  1 17   3.8730     464
  1  1  1 17 -1  0  0  1  2  1 28   3.8731     462
  2  1  1 17  1  0  0  2  2  1 28   3.8731     462
  1  2  1 28  1  0  0  1  1  1 17   3.8731     463
  2  2  1 28 -1  0  0  2  1  1 17   3.8731     463
  1  2  1 17 -1  0  0  1  2  1 28   3.8731     464
  1  2  1 28  1  0  0  1  2  1 17   3.8731     464
  4  2  1 17 -1  0  0  4  2  1 28   3.8731     464
  4  2  1 28  1  0  0  4  2  1 17   3.8731     464
  3  1  1 17  1  0  0  3  2  1 28   3.8731     462
  3  2  1 28 -1  0  0  3  1  1 17   3.8731     463
  3  2  1 17  1  0  0  3  2  1 28   3.8731     464
  3  2  1 28 -1  0  0  3  2  1 17   3.8731     464
  4  1  1 17 -1  0  0  4  2  1 28   3.8731     462
  4  2  1 28  1  0  0  4  1  1 17   3.8731     463
  1  1  1  5  1  0  1  4  1  1 12   3.8733     461
  2  1  1  5 -1  0  0  3  1  1 12   3.8733     461
  3  1  1 12  1  0  0  2  1  1  5   3.8733     461
  4  1  1 12 -1  0 -1  1  1  1  5   3.8733     461
  2  1  1  5 -1  0  0  3  2  1 12   3.8733     462
  3  1  1 12  1  0  0  2  2  1  5   3.8733     462
  2  2  1  5 -1  0  0  3  1  1 12   3.8733     463
  3  2  1 12  1  0  0  2  1  1  5   3.8733     463
  1  1  1 12 -1  0  0  4  1  1  5   3.8733     461
  2  1  1 12  1  0  1  3  1  1  5   3.8733     461
  3  1  1  5 -1  0 -1  2  1  1 12   3.8733     461
  4  1  1  5  1  0  0  1  1  1 12   3.8733     461
  1  1  1  5  1  0  1  4  2  1 12   3.8733     462
  1  1  1 12 -1  0  0  4  2  1  5   3.8733     462
  2  1  1 12  1  0  1  3  2  1  5   3.8733     462
  3  1  1  5 -1  0 -1  2  2  1 12   3.8733     462
  4  1  1  5  1  0  0  1  2  1 12   3.8733     462
  4  1  1 12 -1  0 -1  1  2  1  5   3.8733     462
  1  2  1  5  1  0  1  4  1  1 12   3.8733     463
  1  2  1 12 -1  0  0  4  1  1  5   3.8733     463
  2  2  1 12  1  0  1  3  1  1  5   3.8733     463
  3  2  1  5 -1  0 -1  2  1  1 12   3.8733     463
  4  2  1  5  1  0  0  1  1  1 12   3.8733     463
  4  2  1 12 -1  0 -1  1  1  1  5   3.8733     463
  1  2  1  5  1  0  1  4  2  1 12   3.8733     464
  1  2  1 12 -1  0  0  4  2  1  5   3.8733     464
  2  2  1  5 -1  0  0  3  2  1 12   3.8733     464
  2  2  1 12  1  0  1  3  2  1  5   3.8733     464
  3  2  1  5 -1  0 -1  2  2  1 12   3.8733     464
  3  2  1 12  1  0  0  2  2  1  5   3.8733     464
  4  2  1  5  1  0  0  1  2  1 12   3.8733     464
  4  2  1 12 -1  0 -1  1  2  1  5   3.8733     464
  1  1  1 12 -1  0  0  1  2  1 21   3.8739     462
  2  1  1 12  1  0  0  2  2  1 21   3.8739     462
  1  2  1 21  1  0  0  1  1  1 12   3.8739     463
  2  2  1 21 -1  0  0  2  1  1 12   3.8739     463
  1  2  1 12 -1  0  0  1  2  1 21   3.8739     464
  1  2  1 21  1  0  0  1  2  1 12   3.8739     464
  2  2  1 12  1  0  0  2  2  1 21   3.8739     464
  2  2  1 21 -1  0  0  2  2  1 12   3.8739     464
  4  2  1 12 -1  0  0  4  2  1 21   3.8739     464
  4  2  1 21  1  0  0  4  2  1 12   3.8739     464
  3  1  1 12  1  0  0  3  2  1 21   3.8739     462
  3  2  1 21 -1  0  0  3  1  1 12   3.8739     463
  3  2  1 12  1  0  0  3  2  1 21   3.8739     464
  3  2  1 21 -1  0  0  3  2  1 12   3.8739     464
  4  1  1 12 -1  0  0  4  2  1 21   3.8739     462
  4  2  1 21  1  0  0  4  1  1 12   3.8739     463
  2  1  1 10 -1  1  0  4  1  1  3   3.8745     461
  4  1  1  3  1 -1  0  2  1  1 10   3.8745     461
  4  1  1  3  1 -1  0  2  2  1 10   3.8745     462
  2  2  1 10 -1  1  0  4  1  1  3   3.8745     463
  2  2  1 10 -1  1  0  4  2  1  3   3.8745     464
  4  2  1  3  1 -1  0  2  2  1 10   3.8745     464
  1  1  1 10  1  0  1  3  2  1  3   3.8745     462
  2  1  1  3 -1  1  0  4  2  1 10   3.8745     462
  2  1  1 10 -1  1  0  4  2  1  3   3.8745     462
  4  1  1 10  1 -1  0  2  2  1  3   3.8745     462
  2  2  1  3 -1  1  0  4  1  1 10   3.8745     463
  3  2  1  3 -1  0 -1  1  1  1 10   3.8745     463
  4  2  1  3  1 -1  0  2  1  1 10   3.8745     463
  4  2  1 10  1 -1  0  2  1  1  3   3.8745     463
  1  2  1 10  1  0  1  3  2  1  3   3.8745     464
  2  2  1  3 -1  1  0  4  2  1 10   3.8745     464
  3  2  1  3 -1  0 -1  1  2  1 10   3.8745     464
  4  2  1 10  1 -1  0  2  2  1  3   3.8745     464
  1  1  1  3  1  0  1  3  1  1 10   3.8745     461
  1  1  1 10  1  0  1  3  1  1  3   3.8745     461
  2  1  1  3 -1  1  0  4  1  1 10   3.8745     461
  3  1  1  3 -1  0 -1  1  1  1 10   3.8745     461
  3  1  1 10 -1  0 -1  1  1  1  3   3.8745     461
  4  1  1 10  1 -1  0  2  1  1  3   3.8745     461
  1  1  1  3  1  0  1  3  2  1 10   3.8745     462
  3  1  1  3 -1  0 -1  1  2  1 10   3.8745     462
  3  1  1 10 -1  0 -1  1  2  1  3   3.8745     462
  1  2  1  3  1  0  1  3  1  1 10   3.8745     463
  1  2  1 10  1  0  1  3  1  1  3   3.8745     463
  3  2  1 10 -1  0 -1  1  1  1  3   3.8745     463
  1  2  1  3  1  0  1  3  2  1 10   3.8745     464
  3  2  1 10 -1  0 -1  1  2  1  3   3.8745     464
  2  2  1 20 -1  1  0  4  2  1 21   3.8765     464
  4  2  1 21  1 -1  0  2  2  1 20   3.8765     464
  1  2  1 20  1  0  1  3  2  1 21   3.8765     464
  3  2  1 21 -1  0 -1  1  2  1 20   3.8765     464
  2  2  1 21 -1  1  0  4  2  1 20   3.8765     464
  4  2  1 20  1 -1  0  2  2  1 21   3.8765     464
  1  2  1 21  1  0  1  3  2  1 20   3.8765     464
  3  2  1 20 -1  0 -1  1  2  1 21   3.8765     464
  2  1  1  9 -1  1  0  4  1  1 21   3.8770     461
  4  1  1 21  1 -1  0  2  1  1  9   3.8770     461
  4  1  1 21  1 -1  0  2  2  1  9   3.8770     462
  2  2  1  9 -1  1  0  4  1  1 21   3.8770     463
  2  1  1 21 -1  1  0  4  2  1  9   3.8770     462
  4  2  1  9  1 -1  0  2  1  1 21   3.8770     463
  1  1  1  9  1  0  1  3  1  1 21   3.8770     461
  1  1  1 21  1  0  1  3  1  1  9   3.8770     461
  2  1  1 21 -1  1  0  4  1  1  9   3.8770     461
  3  1  1  9 -1  0 -1  1  1  1 21   3.8770     461
  3  1  1 21 -1  0 -1  1  1  1  9   3.8770     461
  4  1  1  9  1 -1  0  2  1  1 21   3.8770     461
  1  1  1 21  1  0  1  3  2  1  9   3.8770     462
  3  1  1 21 -1  0 -1  1  2  1  9   3.8770     462
  1  2  1  9  1  0  1  3  1  1 21   3.8770     463
  3  2  1  9 -1  0 -1  1  1  1 21   3.8770     463
  2  1  1 11 -1  1  0  4  1  1  4   3.8784     465
  4  1  1  4  1 -1  0  2  1  1 11   3.8784     465
  4  1  1  4  1 -1  0  2  2  1 11   3.8784     466
  2  2  1 11 -1  1  0  4  1  1  4   3.8784     467
  2  1  1 11 -1  1  0  4  2  1  4   3.8784     466
  4  2  1  4  1 -1  0  2  1  1 11   3.8784     467
  2  2  1 11 -1  1  0  4  2  1  4   3.8784     468
  4  2  1  4  1 -1  0  2  2  1 11   3.8784     468
  1  1  1 11  1  0  1  3  2  1  4   3.8784     466
  3  2  1  4 -1  0 -1  1  1  1 11   3.8784     467
  1  2  1 11  1  0  1  3  2  1  4   3.8784     468
  2  2  1  4 -1  1  0  4  2  1 11   3.8784     468
  3  2  1  4 -1  0 -1  1  2  1 11   3.8784     468
  4  2  1 11  1 -1  0  2  2  1  4   3.8784     468
  1  1  1  4  1  0  1  3  1  1 11   3.8784     465
  1  1  1 11  1  0  1  3  1  1  4   3.8784     465
  3  1  1  4 -1  0 -1  1  1  1 11   3.8784     465
  3  1  1 11 -1  0 -1  1  1  1  4   3.8784     465
  1  1  1  4  1  0  1  3  2  1 11   3.8784     466
  2  1  1  4 -1  1  0  4  2  1 11   3.8784     466
  3  1  1  4 -1  0 -1  1  2  1 11   3.8784     466
  3  1  1 11 -1  0 -1  1  2  1  4   3.8784     466
  4  1  1 11  1 -1  0  2  2  1  4   3.8784     466
  1  2  1  4  1  0  1  3  1  1 11   3.8784     467
  1  2  1 11  1  0  1  3  1  1  4   3.8784     467
  2  2  1  4 -1  1  0  4  1  1 11   3.8784     467
  3  2  1 11 -1  0 -1  1  1  1  4   3.8784     467
  4  2  1 11  1 -1  0  2  1  1  4   3.8784     467
  1  2  1  4  1  0  1  3  2  1 11   3.8784     468
  3  2  1 11 -1  0 -1  1  2  1  4   3.8784     468
  2  1  1  4 -1  1  0  4  1  1 11   3.8784     465
  4  1  1 11  1 -1  0  2  1  1  4   3.8784     465
  2  1  1 20  0  0  0  3  1  1 13   3.8816     465
  3  1  1 13  0  0  0  2  1  1 20   3.8816     465
  1  1  1 20  0  0  1  4  1  1 13   3.8816     465
  4  1  1 13  0  0 -1  1  1  1 20   3.8816     465
  2  1  1 20  0  0  0  3  2  1 13   3.8816     466
  3  2  1 13  0  0  0  2  1  1 20   3.8816     467
  1  1  1 13  0  0  0  4  1  1 20   3.8816     465
  2  1  1 13  0  0  1  3  1  1 20   3.8816     465
  3  1  1 20  0  0 -1  2  1  1 13   3.8816     465
  4  1  1 20  0  0  0  1  1  1 13   3.8816     465
  1  1  1 20  0  0  1  4  2  1 13   3.8816     466
  3  1  1 20  0  0 -1  2  2  1 13   3.8816     466
  4  1  1 20  0  0  0  1  2  1 13   3.8816     466
  1  2  1 13  0  0  0  4  1  1 20   3.8816     467
  2  2  1 13  0  0  1  3  1  1 20   3.8816     467
  4  2  1 13  0  0 -1  1  1  1 20   3.8816     467
  4  1  1  8  1 -1  0  2  2  1 15   3.8820     466
  4  1  1 15  1 -1  0  2  2  1  8   3.8820     466
  2  2  1  8 -1  1  0  4  1  1 15   3.8820     467
  2  2  1 15 -1  1  0  4  1  1  8   3.8820     467
  2  2  1  8 -1  1  0  4  2  1 15   3.8820     468
  2  2  1 15 -1  1  0  4  2  1  8   3.8820     468
  4  2  1  8  1 -1  0  2  2  1 15   3.8820     468
  4  2  1 15  1 -1  0  2  2  1  8   3.8820     468
  1  1  1 15  1  0  1  3  1  1  8   3.8820     465
  2  1  1  8 -1  1  0  4  1  1 15   3.8820     465
  2  1  1 15 -1  1  0  4  1  1  8   3.8820     465
  3  1  1  8 -1  0 -1  1  1  1 15   3.8820     465
  4  1  1  8  1 -1  0  2  1  1 15   3.8820     465
  4  1  1 15  1 -1  0  2  1  1  8   3.8820     465
  1  1  1  8  1  0  1  3  2  1 15   3.8820     466
  1  1  1 15  1  0  1  3  2  1  8   3.8820     466
  2  1  1  8 -1  1  0  4  2  1 15   3.8820     466
  2  1  1 15 -1  1  0  4  2  1  8   3.8820     466
  3  1  1  8 -1  0 -1  1  2  1 15   3.8820     466
  1  2  1 15  1  0  1  3  1  1  8   3.8820     467
  3  2  1  8 -1  0 -1  1  1  1 15   3.8820     467
  3  2  1 15 -1  0 -1  1  1  1  8   3.8820     467
  4  2  1  8  1 -1  0  2  1  1 15   3.8820     467
  4  2  1 15  1 -1  0  2  1  1  8   3.8820     467
  1  2  1  8  1  0  1  3  2  1 15   3.8820     468
  1  2  1 15  1  0  1  3  2  1  8   3.8820     468
  3  2  1  8 -1  0 -1  1  2  1 15   3.8820     468
  3  2  1 15 -1  0 -1  1  2  1  8   3.8820     468
  1  1  1  8  1  0  1  3  1  1 15   3.8820     465
  3  1  1 15 -1  0 -1  1  1  1  8   3.8820     465
  3  1  1 15 -1  0 -1  1  2  1  8   3.8820     466
  1  2  1  8  1  0  1  3  1  1 15   3.8820     467
  4  1  1  2  1 -1  0  2  2  1  9   3.8876     470
  2  2  1  9 -1  1  0  4  1  1  2   3.8876     471
  2  2  1  9 -1  1  0  4  2  1  2   3.8876     472
  4  2  1  2  1 -1  0  2  2  1  9   3.8876     472
  2  1  1  9 -1  1  0  4  1  1  2   3.8876     469
  4  1  1  2  1 -1  0  2  1  1  9   3.8876     469
  1  1  1  9  1  0  1  3  2  1  2   3.8876     470
  1  1  1 20  1  0  1  3  2  1 21   3.8876     470
  2  1  1  9 -1  1  0  4  2  1  2   3.8876     470
  2  1  1 20 -1  1  0  4  2  1 21   3.8876     470
  3  2  1  2 -1  0 -1  1  1  1  9   3.8876     471
  3  2  1 21 -1  0 -1  1  1  1 20   3.8876     471
  4  2  1  2  1 -1  0  2  1  1  9   3.8876     471
  4  2  1 21  1 -1  0  2  1  1 20   3.8876     471
  1  2  1  9  1  0  1  3  2  1  2   3.8876     472
  2  2  1  2 -1  1  0  4  2  1  9   3.8876     472
  3  2  1  2 -1  0 -1  1  2  1  9   3.8876     472
  4  2  1  9  1 -1  0  2  2  1  2   3.8876     472
  1  1  1  2  1  0  1  3  1  1  9   3.8876     469
  2  1  1  2 -1  1  0  4  1  1  9   3.8876     469
  3  1  1  9 -1  0 -1  1  1  1  2   3.8876     469
  4  1  1  9  1 -1  0  2  1  1  2   3.8876     469
  1  1  1  2  1  0  1  3  2  1  9   3.8876     470
  2  1  1  2 -1  1  0  4  2  1  9   3.8876     470
  3  1  1  9 -1  0 -1  1  2  1  2   3.8876     470
  3  1  1 20 -1  0 -1  1  2  1 21   3.8876     470
  4  1  1  9  1 -1  0  2  2  1  2   3.8876     470
  1  2  1  2  1  0  1  3  1  1  9   3.8876     471
  1  2  1 21  1  0  1  3  1  1 20   3.8876     471
  2  2  1  2 -1  1  0  4  1  1  9   3.8876     471
  3  2  1  9 -1  0 -1  1  1  1  2   3.8876     471
  4  2  1  9  1 -1  0  2  1  1  2   3.8876     471
  1  2  1  2  1  0  1  3  2  1  9   3.8876     472
  3  2  1  9 -1  0 -1  1  2  1  2   3.8876     472
  1  1  1  9  1  0  1  3  1  1  2   3.8876     469
  3  1  1  2 -1  0 -1  1  1  1  9   3.8876     469
  3  1  1  2 -1  0 -1  1  2  1  9   3.8876     470
  4  1  1 20  1 -1  0  2  2  1 21   3.8876     470
  1  2  1  9  1  0  1  3  1  1  2   3.8876     471
  2  2  1 21 -1  1  0  4  1  1 20   3.8876     471
  4  1  1 21  1 -1  0  2  2  1 20   3.8877     470
  2  2  1 20 -1  1  0  4  1  1 21   3.8877     471
  1  1  1 21  1  0  1  3  2  1 20   3.8877     470
  2  1  1 21 -1  1  0  4  2  1 20   3.8877     470
  3  1  1 21 -1  0 -1  1  2  1 20   3.8877     470
  1  2  1 20  1  0  1  3  1  1 21   3.8877     471
  3  2  1 20 -1  0 -1  1  1  1 21   3.8877     471
  4  2  1 20  1 -1  0  2  1  1 21   3.8877     471
  3  1  1 24 -1  1  0  4  1  1 18   3.8901     469
  4  1  1 18  1 -1  0  3  1  1 24   3.8901     469
  3  1  1 24 -1  1  0  4  2  1 18   3.8901     470
  4  2  1 18  1 -1  0  3  1  1 24   3.8901     471
  1  1  1 18  1  0  0  2  1  1 24   3.8901     469
  1  1  1 24  1 -1  0  2  1  1 18   3.8901     469
  2  1  1 18 -1  1  0  1  1  1 24   3.8901     469
  2  1  1 24 -1  0  0  1  1  1 18   3.8901     469
  1  1  1 24  1 -1  0  2  2  1 18   3.8901     470
  2  1  1 18 -1  1  0  1  2  1 24   3.8901     470
  2  1  1 24 -1  0  0  1  2  1 18   3.8901     470
  4  1  1 18  1 -1  0  3  2  1 24   3.8901     470
  1  2  1 18  1  0  0  2  1  1 24   3.8901     471
  1  2  1 24  1 -1  0  2  1  1 18   3.8901     471
  2  2  1 18 -1  1  0  1  1  1 24   3.8901     471
  3  2  1 24 -1  1  0  4  1  1 18   3.8901     471
  1  2  1 24  1 -1  0  2  2  1 18   3.8901     472
  2  2  1 18 -1  1  0  1  2  1 24   3.8901     472
  3  2  1 24 -1  1  0  4  2  1 18   3.8901     472
  4  2  1 18  1 -1  0  3  2  1 24   3.8901     472
  3  1  1 18 -1  0  0  4  1  1 24   3.8901     469
  4  1  1 24  1  0  0  3  1  1 18   3.8901     469
  1  1  1 18  1  0  0  2  2  1 24   3.8901     470
  3  1  1 18 -1  0  0  4  2  1 24   3.8901     470
  2  2  1 24 -1  0  0  1  1  1 18   3.8901     471
  4  2  1 24  1  0  0  3  1  1 18   3.8901     471
  1  2  1 18  1  0  0  2  2  1 24   3.8901     472
  2  2  1 24 -1  0  0  1  2  1 18   3.8901     472
  4  1  1 24  1  0  0  3  2  1 18   3.8901     470
  3  2  1 18 -1  0  0  4  1  1 24   3.8901     471
  3  2  1 18 -1  0  0  4  2  1 24   3.8901     472
  4  2  1 24  1  0  0  3  2  1 18   3.8901     472
  1  1  1 20  0  0  1  4  1  1 12   3.8937     473
  2  1  1 20  0  0  0  3  1  1 12   3.8937     473
  3  1  1 12  0  0  0  2  1  1 20   3.8937     473
  4  1  1 12  0  0 -1  1  1  1 20   3.8937     473
  2  1  1 20  0  0  0  3  2  1 12   3.8937     474
  3  2  1 12  0  0  0  2  1  1 20   3.8937     475
  1  1  1 20  0  0  1  4  2  1 12   3.8938     474
  4  2  1 12  0  0 -1  1  1  1 20   3.8938     475
  1  1  1 12  0  0  0  4  1  1 20   3.8938     473
  2  1  1 12  0  0  1  3  1  1 20   3.8938     473
  3  1  1 20  0  0 -1  2  1  1 12   3.8938     473
  4  1  1 20  0  0  0  1  1  1 12   3.8938     473
  3  1  1 20  0  0 -1  2  2  1 12   3.8938     474
  4  1  1 20  0  0  0  1  2  1 12   3.8938     474
  1  2  1 12  0  0  0  4  1  1 20   3.8938     475
  2  2  1 12  0  0  1  3  1  1 20   3.8938     475
  2  1  1 16 -1  1  0  4  1  1 22   3.8969     473
  4  1  1 22  1 -1  0  2  1  1 16   3.8969     473
  4  1  1 22  1 -1  0  2  2  1 16   3.8969     474
  2  2  1 16 -1  1  0  4  1  1 22   3.8969     475
  1  1  1 16  1  0  1  3  2  1 22   3.8969     474
  2  1  1 16 -1  1  0  4  2  1 22   3.8969     474
  3  2  1 22 -1  0 -1  1  1  1 16   3.8969     475
  4  2  1 22  1 -1  0  2  1  1 16   3.8969     475
  1  2  1 16  1  0  1  3  2  1 22   3.8969     476
  2  2  1 16 -1  1  0  4  2  1 22   3.8969     476
  3  2  1 22 -1  0 -1  1  2  1 16   3.8969     476
  4  2  1 22  1 -1  0  2  2  1 16   3.8969     476
  2  2  1 22 -1  1  0  4  2  1 16   3.8969     476
  4  2  1 16  1 -1  0  2  2  1 22   3.8969     476
  1  1  1 16  1  0  1  3  1  1 22   3.8969     473
  1  1  1 22  1  0  1  3  1  1 16   3.8969     473
  3  1  1 16 -1  0 -1  1  1  1 22   3.8969     473
  3  1  1 22 -1  0 -1  1  1  1 16   3.8969     473
  1  1  1 22  1  0  1  3  2  1 16   3.8969     474
  2  1  1 22 -1  1  0  4  2  1 16   3.8969     474
  3  1  1 16 -1  0 -1  1  2  1 22   3.8969     474
  3  1  1 22 -1  0 -1  1  2  1 16   3.8969     474
  1  2  1 16  1  0  1  3  1  1 22   3.8969     475
  1  2  1 22  1  0  1  3  1  1 16   3.8969     475
  3  2  1 16 -1  0 -1  1  1  1 22   3.8969     475
  4  2  1 16  1 -1  0  2  1  1 22   3.8969     475
  1  2  1 22  1  0  1  3  2  1 16   3.8969     476
  3  2  1 16 -1  0 -1  1  2  1 22   3.8969     476
  4  1  1 16  1 -1  0  2  2  1 22   3.8969     474
  2  2  1 22 -1  1  0  4  1  1 16   3.8969     475
  2  1  1 22 -1  1  0  4  1  1 16   3.8969     473
  4  1  1 16  1 -1  0  2  1  1 22   3.8969     473
  1  1  1 27  1  0  1  3  2  1 26   3.8987     474
  3  2  1 26 -1  0 -1  1  1  1 27   3.8987     475
  4  2  1 26  1 -1  0  2  1  1 27   3.8987     475
  2  1  1 27 -1  1  0  4  2  1 26   3.8987     474
  3  1  1 27 -1  0 -1  1  2  1 26   3.8987     474
  4  1  1 27  1 -1  0  2  2  1 26   3.8987     474
  1  2  1 26  1  0  1  3  1  1 27   3.8987     475
  2  2  1 26 -1  1  0  4  1  1 27   3.8987     475
  1  1  1 14  1  0  0  2  1  1  3   3.8995     477
  2  1  1  3 -1  0  0  1  1  1 14   3.8995     477
  2  1  1  3 -1  0  0  1  2  1 14   3.8995     478
  1  2  1 14  1  0  0  2  1  1  3   3.8995     479
  1  1  1  3  1 -1  0  2  1  1 14   3.8995     477
  2  1  1 14 -1  1  0  1  1  1  3   3.8995     477
  3  1  1  3 -1  1  0  4  1  1 14   3.8995     477
  3  1  1 14 -1  0  0  4  1  1  3   3.8995     477
  4  1  1  3  1  0  0  3  1  1 14   3.8995     477
  4  1  1 14  1 -1  0  3  1  1  3   3.8995     477
  1  1  1  3  1 -1  0  2  2  1 14   3.8995     478
  1  1  1 14  1  0  0  2  2  1  3   3.8995     478
  2  1  1 14 -1  1  0  1  2  1  3   3.8995     478
  3  1  1  3 -1  1  0  4  2  1 14   3.8995     478
  3  1  1 14 -1  0  0  4  2  1  3   3.8995     478
  1  2  1  3  1 -1  0  2  1  1 14   3.8995     479
  2  2  1  3 -1  0  0  1  1  1 14   3.8995     479
  2  2  1 14 -1  1  0  1  1  1  3   3.8995     479
  4  2  1  3  1  0  0  3  1  1 14   3.8995     479
  4  2  1 14  1 -1  0  3  1  1  3   3.8995     479
  1  2  1  3  1 -1  0  2  2  1 14   3.8995     480
  1  2  1 14  1  0  0  2  2  1  3   3.8995     480
  2  2  1  3 -1  0  0  1  2  1 14   3.8995     480
  2  2  1 14 -1  1  0  1  2  1  3   3.8995     480
  3  2  1  3 -1  1  0  4  2  1 14   3.8995     480
  3  2  1 14 -1  0  0  4  2  1  3   3.8995     480
  4  2  1  3  1  0  0  3  2  1 14   3.8995     480
  4  1  1  3  1  0  0  3  2  1 14   3.8995     478
  4  1  1 14  1 -1  0  3  2  1  3   3.8995     478
  3  2  1  3 -1  1  0  4  1  1 14   3.8995     479
  3  2  1 14 -1  0  0  4  1  1  3   3.8995     479
  4  2  1 14  1 -1  0  3  2  1  3   3.8995     480
  2  1  1 20 -1  1  0  4  1  1 21   3.9005     477
  4  1  1 21  1 -1  0  2  1  1 20   3.9005     477
  1  1  1 20  1  0  1  3  1  1 21   3.9006     477
  1  1  1 21  1  0  1  3  1  1 20   3.9006     477
  3  1  1 20 -1  0 -1  1  1  1 21   3.9006     477
  3  1  1 21 -1  0 -1  1  1  1 20   3.9006     477
  2  1  1 21 -1  1  0  4  1  1 20   3.9006     477
  4  1  1 20  1 -1  0  2  1  1 21   3.9006     477
  1  1  1 11  0  0  0  4  2  1 25   3.9033     478
  3  1  1 11  0  0  0  2  2  1 25   3.9033     478
  2  2  1 25  0  0  0  3  1  1 11   3.9033     479
  4  2  1 25  0  0  0  1  1  1 11   3.9033     479
  1  2  1 11  0  0  0  4  2  1 25   3.9033     480
  2  2  1 25  0  0  0  3  2  1 11   3.9033     480
  3  2  1 11  0  0  0  2  2  1 25   3.9033     480
  4  2  1 25  0  0  0  1  2  1 11   3.9033     480
  1  1  1 11  0  0  0  4  1  1 25   3.9033     477
  1  1  1 25  0  0  1  4  1  1 11   3.9033     477
  2  1  1 25  0  0  0  3  1  1 11   3.9033     477
  3  1  1 11  0  0  0  2  1  1 25   3.9033     477
  4  1  1 11  0  0 -1  1  1  1 25   3.9033     477
  4  1  1 25  0  0  0  1  1  1 11   3.9033     477
  2  1  1 25  0  0  0  3  2  1 11   3.9033     478
  4  1  1 11  0  0 -1  1  2  1 25   3.9033     478
  4  1  1 25  0  0  0  1  2  1 11   3.9033     478
  1  2  1 11  0  0  0  4  1  1 25   3.9033     479
  1  2  1 25  0  0  1  4  1  1 11   3.9033     479
  3  2  1 11  0  0  0  2  1  1 25   3.9033     479
  2  1  1 11  0  0  1  3  1  1 25   3.9034     477
  3  1  1 25  0  0 -1  2  1  1 11   3.9034     477
  1  1  1 25  0  0  1  4  2  1 11   3.9034     478
  2  1  1 11  0  0  1  3  2  1 25   3.9034     478
  3  2  1 25  0  0 -1  2  1  1 11   3.9034     479
  4  2  1 11  0  0 -1  1  1  1 25   3.9034     479
  1  2  1 25  0  0  1  4  2  1 11   3.9034     480
  4  2  1 11  0  0 -1  1  2  1 25   3.9034     480
  3  1  1 25  0  0 -1  2  2  1 11   3.9034     478
  2  2  1 11  0  0  1  3  1  1 25   3.9034     479
  2  2  1 11  0  0  1  3  2  1 25   3.9034     480
  3  2  1 25  0  0 -1  2  2  1 11   3.9034     480
  2  2  1 10 -1  1  0  4  2  1 26   3.9058     484
  4  2  1 26  1 -1  0  2  2  1 10   3.9058     484
  1  1  1 10  1  0  1  3  2  1 26   3.9058     482
  2  1  1 10 -1  1  0  4  2  1 26   3.9058     482
  3  2  1 26 -1  0 -1  1  1  1 10   3.9058     483
  4  2  1 26  1 -1  0  2  1  1 10   3.9058     483
  1  2  1 10  1  0  1  3  2  1 26   3.9058     484
  3  2  1 26 -1  0 -1  1  2  1 10   3.9058     484
  1  2  1 26  1  0  1  3  2  1 10   3.9058     484
  2  2  1 26 -1  1  0  4  2  1 10   3.9058     484
  3  2  1 10 -1  0 -1  1  2  1 26   3.9058     484
  4  2  1 10  1 -1  0  2  2  1 26   3.9058     484
  3  1  1 10 -1  0 -1  1  2  1 26   3.9058     482
  4  1  1 10  1 -1  0  2  2  1 26   3.9058     482
  1  2  1 26  1  0  1  3  1  1 10   3.9058     483
  2  2  1 26 -1  1  0  4  1  1 10   3.9058     483
  2  1  1 14 -1  1  0  4  1  1 23   3.9114     485
  4  1  1 23  1 -1  0  2  1  1 14   3.9114     485
  4  1  1 23  1 -1  0  2  2  1 14   3.9114     486
  2  2  1 14 -1  1  0  4  1  1 23   3.9114     487
  2  2  1 14 -1  1  0  4  2  1 23   3.9114     488
  4  2  1 23  1 -1  0  2  2  1 14   3.9114     488
  1  1  1 14  1  0  1  3  2  1 23   3.9114     486
  2  1  1 14 -1  1  0  4  2  1 23   3.9114     486
  3  2  1 23 -1  0 -1  1  1  1 14   3.9114     487
  4  2  1 23  1 -1  0  2  1  1 14   3.9114     487
  1  2  1 14  1  0  1  3  2  1 23   3.9114     488
  3  2  1 23 -1  0 -1  1  2  1 14   3.9114     488
  1  1  1 14  1  0  1  3  1  1 23   3.9114     485
  3  1  1 23 -1  0 -1  1  1  1 14   3.9114     485
  1  1  1 23  1  0  1  3  2  1 14   3.9114     486
  3  1  1 23 -1  0 -1  1  2  1 14   3.9114     486
  4  1  1 14  1 -1  0  2  2  1 23   3.9114     486
  1  2  1 14  1  0  1  3  1  1 23   3.9114     487
  2  2  1 23 -1  1  0  4  1  1 14   3.9114     487
  3  2  1 14 -1  0 -1  1  1  1 23   3.9114     487
  1  2  1 23  1  0  1  3  2  1 14   3.9114     488
  2  2  1 23 -1  1  0  4  2  1 14   3.9114     488
  3  2  1 14 -1  0 -1  1  2  1 23   3.9114     488
  4  2  1 14  1 -1  0  2  2  1 23   3.9114     488
  1  1  1 23  1  0  1  3  1  1 14   3.9114     485
  3  1  1 14 -1  0 -1  1  1  1 23   3.9114     485
  2  1  1 23 -1  1  0  4  2  1 14   3.9114     486
  3  1  1 14 -1  0 -1  1  2  1 23   3.9114     486
  1  2  1 23  1  0  1  3  1  1 14   3.9114     487
  4  2  1 14  1 -1  0  2  1  1 23   3.9114     487
  2  1  1 23 -1  1  0  4  1  1 14   3.9114     485
  4  1  1 14  1 -1  0  2  1  1 23   3.9114     485
  4  1  1 11  1  0  0  3  2  1 19   3.9121     486
  4  1  1 19  1 -1  0  3  2  1 11   3.9121     486
  3  2  1 11 -1  1  0  4  1  1 19   3.9121     487
  3  2  1 19 -1  0  0  4  1  1 11   3.9121     487
  3  1  1 11 -1  1  0  4  1  1 19   3.9122     485
  3  1  1 19 -1  0  0  4  1  1 11   3.9122     485
  4  1  1 11  1  0  0  3  1  1 19   3.9122     485
  4  1  1 19  1 -1  0  3  1  1 11   3.9122     485
  3  2  1 11 -1  1  0  4  2  1 19   3.9122     488
  4  2  1 19  1 -1  0  3  2  1 11   3.9122     488
  1  1  1 11  1 -1  0  2  1  1 19   3.9122     485
  1  1  1 19  1  0  0  2  1  1 11   3.9122     485
  2  1  1 11 -1  0  0  1  1  1 19   3.9122     485
  2  1  1 19 -1  1  0  1  1  1 11   3.9122     485
  1  1  1 11  1 -1  0  2  2  1 19   3.9122     486
  1  1  1 19  1  0  0  2  2  1 11   3.9122     486
  2  1  1 11 -1  0  0  1  2  1 19   3.9122     486
  2  1  1 19 -1  1  0  1  2  1 11   3.9122     486
  3  1  1 11 -1  1  0  4  2  1 19   3.9122     486
  3  1  1 19 -1  0  0  4  2  1 11   3.9122     486
  1  2  1 11  1 -1  0  2  1  1 19   3.9122     487
  1  2  1 19  1  0  0  2  1  1 11   3.9122     487
  2  2  1 11 -1  0  0  1  1  1 19   3.9122     487
  2  2  1 19 -1  1  0  1  1  1 11   3.9122     487
  4  2  1 11  1  0  0  3  1  1 19   3.9122     487
  4  2  1 19  1 -1  0  3  1  1 11   3.9122     487
  1  2  1 11  1 -1  0  2  2  1 19   3.9122     488
  1  2  1 19  1  0  0  2  2  1 11   3.9122     488
  2  2  1 11 -1  0  0  1  2  1 19   3.9122     488
  2  2  1 19 -1  1  0  1  2  1 11   3.9122     488
  3  2  1 19 -1  0  0  4  2  1 11   3.9122     488
  4  2  1 11  1  0  0  3  2  1 19   3.9122     488
  1  1  1  3  0  0  0  4  2  1 24   3.9143     486
  4  2  1 24  0  0  0  1  1  1  3   3.9143     487
  1  2  1  3  0  0  0  4  2  1 24   3.9143     488
  4  2  1 24  0  0  0  1  2  1  3   3.9143     488
  1  1  1  3  0  0  0  4  1  1 24   3.9143     485
  4  1  1 24  0  0  0  1  1  1  3   3.9143     485
  3  1  1  3  0  0  0  2  2  1 24   3.9143     486
  4  1  1 24  0  0  0  1  2  1  3   3.9143     486
  1  2  1  3  0  0  0  4  1  1 24   3.9143     487
  2  2  1 24  0  0  0  3  1  1  3   3.9143     487
  2  1  1 24  0  0  0  3  1  1  3   3.9143     485
  3  1  1  3  0  0  0  2  1  1 24   3.9143     485
  2  1  1  3  0  0  1  3  2  1 24   3.9143     486
  3  2  1 24  0  0 -1  2  1  1  3   3.9143     487
  2  1  1  3  0  0  1  3  1  1 24   3.9143     485
  3  1  1 24  0  0 -1  2  1  1  3   3.9143     485
  2  1  1 24  0  0  0  3  2  1  3   3.9143     486
  3  2  1  3  0  0  0  2  1  1 24   3.9143     487
  2  2  1  3  0  0  1  3  2  1 24   3.9143     488
  2  2  1 24  0  0  0  3  2  1  3   3.9143     488
  3  2  1  3  0  0  0  2  2  1 24   3.9143     488
  3  2  1 24  0  0 -1  2  2  1  3   3.9143     488
  1  1  1 24  0  0  1  4  1  1  3   3.9143     485
  4  1  1  3  0  0 -1  1  1  1 24   3.9143     485
  1  1  1 24  0  0  1  4  2  1  3   3.9143     486
  3  1  1 24  0  0 -1  2  2  1  3   3.9143     486
  4  1  1  3  0  0 -1  1  2  1 24   3.9143     486
  1  2  1 24  0  0  1  4  1  1  3   3.9143     487
  2  2  1  3  0  0  1  3  1  1 24   3.9143     487
  4  2  1  3  0  0 -1  1  1  1 24   3.9143     487
  1  2  1 24  0  0  1  4  2  1  3   3.9143     488
  4  2  1  3  0  0 -1  1  2  1 24   3.9143     488
  1  1  1 13  1  0  0  2  1  1  4   3.9172     489
  2  1  1  4 -1  0  0  1  1  1 13   3.9172     489
  3  1  1  4 -1  1  0  4  1  1 13   3.9172     489
  4  1  1 13  1 -1  0  3  1  1  4   3.9172     489
  2  1  1  4 -1  0  0  1  2  1 13   3.9172     490
  3  1  1  4 -1  1  0  4  2  1 13   3.9172     490
  1  2  1 13  1  0  0  2  1  1  4   3.9172     491
  4  2  1 13  1 -1  0  3  1  1  4   3.9172     491
  1  1  1  4  1 -1  0  2  1  1 13   3.9172     489
  2  1  1 13 -1  1  0  1  1  1  4   3.9172     489
  1  1  1  4  1 -1  0  2  2  1 13   3.9172     490
  1  1  1 13  1  0  0  2  2  1  4   3.9172     490
  2  1  1 13 -1  1  0  1  2  1  4   3.9172     490
  3  1  1 13 -1  0  0  4  2  1  4   3.9172     490
  4  1  1 13  1 -1  0  3  2  1  4   3.9172     490
  1  2  1  4  1 -1  0  2  1  1 13   3.9172     491
  2  2  1  4 -1  0  0  1  1  1 13   3.9172     491
  2  2  1 13 -1  1  0  1  1  1  4   3.9172     491
  3  2  1  4 -1  1  0  4  1  1 13   3.9172     491
  4  2  1  4  1  0  0  3  1  1 13   3.9172     491
  1  2  1  4  1 -1  0  2  2  1 13   3.9172     492
  1  2  1 13  1  0  0  2  2  1  4   3.9172     492
  2  2  1  4 -1  0  0  1  2  1 13   3.9172     492
  2  2  1 13 -1  1  0  1  2  1  4   3.9172     492
  3  2  1  4 -1  1  0  4  2  1 13   3.9172     492
  3  2  1 13 -1  0  0  4  2  1  4   3.9172     492
  4  2  1  4  1  0  0  3  2  1 13   3.9172     492
  4  2  1 13  1 -1  0  3  2  1  4   3.9172     492
  3  1  1 13 -1  0  0  4  1  1  4   3.9172     489
  4  1  1  4  1  0  0  3  1  1 13   3.9172     489
  4  1  1  4  1  0  0  3  2  1 13   3.9172     490
  3  2  1 13 -1  0  0  4  1  1  4   3.9172     491
  2  1  1 20 -1  1  0  4  1  1 22   3.9275     493
  4  1  1 22  1 -1  0  2  1  1 20   3.9275     493
  3  2  1 22 -1  0 -1  1  1  1 20   3.9275     495
  1  1  1 22  1  0  1  3  1  1 20   3.9275     493
  3  1  1 20 -1  0 -1  1  1  1 22   3.9275     493
  1  1  1 20  1  0  1  3  2  1 22   3.9275     494
  2  1  1 20 -1  1  0  4  2  1 22   3.9275     494
  3  1  1 20 -1  0 -1  1  2  1 22   3.9275     494
  1  2  1 22  1  0  1  3  1  1 20   3.9275     495
  4  2  1 22  1 -1  0  2  1  1 20   3.9275     495
  1  1  1 20  1  0  1  3  1  1 22   3.9275     493
  3  1  1 22 -1  0 -1  1  1  1 20   3.9275     493
  4  1  1 20  1 -1  0  2  2  1 22   3.9275     494
  2  2  1 22 -1  1  0  4  1  1 20   3.9275     495
  2  1  1 22 -1  1  0  4  1  1 20   3.9276     493
  4  1  1 20  1 -1  0  2  1  1 22   3.9276     493
  4  1  1 22  1 -1  0  2  2  1 20   3.9358     498
  2  2  1 20 -1  1  0  4  1  1 22   3.9358     499
  1  2  1 20  1  0  1  3  2  1 22   3.9358     500
  2  2  1 20 -1  1  0  4  2  1 22   3.9358     500
  2  2  1 22 -1  1  0  4  2  1 20   3.9358     500
  3  2  1 22 -1  0 -1  1  2  1 20   3.9358     500
  4  2  1 20  1 -1  0  2  2  1 22   3.9358     500
  4  2  1 22  1 -1  0  2  2  1 20   3.9358     500
  1  1  1 22  1  0  1  3  2  1 20   3.9358     498
  2  1  1 22 -1  1  0  4  2  1 20   3.9358     498
  3  1  1 22 -1  0 -1  1  2  1 20   3.9358     498
  1  2  1 20  1  0  1  3  1  1 22   3.9358     499
  3  2  1 20 -1  0 -1  1  1  1 22   3.9358     499
  4  2  1 20  1 -1  0  2  1  1 22   3.9358     499
  1  2  1 22  1  0  1  3  2  1 20   3.9358     500
  3  2  1 20 -1  0 -1  1  2  1 22   3.9358     500
  3  1  1 21 -1  0  0  4  1  1  9   3.9384     497
  4  1  1  9  1  0  0  3  1  1 21   3.9384     497
  1  1  1  9  1 -1  0  2  1  1 21   3.9384     497
  1  1  1 21  1  0  0  2  1  1  9   3.9384     497
  2  1  1  9 -1  0  0  1  1  1 21   3.9384     497
  2  1  1 21 -1  1  0  1  1  1  9   3.9384     497
  3  1  1  9 -1  1  0  4  1  1 21   3.9384     497
  4  1  1 21  1 -1  0  3  1  1  9   3.9384     497
  2  1  1 21 -1  1  0  1  2  1  9   3.9384     498
  3  1  1 21 -1  0  0  4  2  1  9   3.9384     498
  1  2  1  9  1 -1  0  2  1  1 21   3.9384     499
  4  2  1  9  1  0  0  3  1  1 21   3.9384     499
  1  1  1 21  1  0  0  2  2  1  9   3.9384     498
  4  1  1 21  1 -1  0  3  2  1  9   3.9384     498
  2  2  1  9 -1  0  0  1  1  1 21   3.9384     499
  3  2  1  9 -1  1  0  4  1  1 21   3.9384     499
  3  1  1 19 -1  0  0  4  1  1 26   3.9419     501
  4  1  1 26  1  0  0  3  1  1 19   3.9419     501
  4  1  1 26  1  0  0  3  2  1 19   3.9419     502
  3  2  1 19 -1  0  0  4  1  1 26   3.9419     503
  1  1  1 26  1 -1  0  2  1  1 19   3.9419     501
  2  1  1 19 -1  1  0  1  1  1 26   3.9419     501
  3  1  1 26 -1  1  0  4  1  1 19   3.9419     501
  4  1  1 19  1 -1  0  3  1  1 26   3.9419     501
  1  1  1 26  1 -1  0  2  2  1 19   3.9419     502
  3  1  1 26 -1  1  0  4  2  1 19   3.9419     502
  2  2  1 19 -1  1  0  1  1  1 26   3.9419     503
  4  2  1 19  1 -1  0  3  1  1 26   3.9419     503
  1  1  1 19  1  0  0  2  1  1 26   3.9420     501
  2  1  1 26 -1  0  0  1  1  1 19   3.9420     501
  2  1  1 26 -1  0  0  1  2  1 19   3.9420     502
  1  2  1 19  1  0  0  2  1  1 26   3.9420     503
  2  1  1 11  1  0  0  2  2  1 26   3.9436     502
  2  2  1 26 -1  0  0  2  1  1 11   3.9436     503
  2  2  1 11  1  0  0  2  2  1 26   3.9436     504
  2  2  1 26 -1  0  0  2  2  1 11   3.9436     504
  1  1  1 11 -1  0  0  1  2  1 26   3.9436     502
  1  2  1 26  1  0  0  1  1  1 11   3.9436     503
  1  2  1 11 -1  0  0  1  2  1 26   3.9436     504
  1  2  1 26  1  0  0  1  2  1 11   3.9436     504
  4  2  1 11 -1  0  0  4  2  1 26   3.9436     504
  4  2  1 26  1  0  0  4  2  1 11   3.9436     504
  3  1  1 11  1  0  0  3  2  1 26   3.9436     502
  3  2  1 26 -1  0  0  3  1  1 11   3.9436     503
  4  1  1 11 -1  0  0  4  2  1 26   3.9436     502
  4  2  1 26  1  0  0  4  1  1 11   3.9436     503
  3  2  1 11  1  0  0  3  2  1 26   3.9436     504
  3  2  1 26 -1  0  0  3  2  1 11   3.9436     504
  2  1  1 10 -1  1  0  4  1  1 23   3.9443     501
  4  1  1 23  1 -1  0  2  1  1 10   3.9443     501
  4  1  1 23  1 -1  0  2  2  1 10   3.9443     502
  2  2  1 10 -1  1  0  4  1  1 23   3.9443     503
  2  1  1 10 -1  1  0  4  2  1 23   3.9443     502
  4  2  1 23  1 -1  0  2  1  1 10   3.9443     503
  2  2  1 10 -1  1  0  4  2  1 23   3.9443     504
  2  2  1 23 -1  1  0  4  2  1 10   3.9443     504
  4  2  1 10  1 -1  0  2  2  1 23   3.9443     504
  4  2  1 23  1 -1  0  2  2  1 10   3.9443     504
  1  1  1 10  1  0  1  3  1  1 23   3.9443     501
  3  1  1 23 -1  0 -1  1  1  1 10   3.9443     501
  1  1  1 10  1  0  1  3  2  1 23   3.9443     502
  3  1  1 10 -1  0 -1  1  2  1 23   3.9443     502
  3  1  1 23 -1  0 -1  1  2  1 10   3.9443     502
  1  2  1 10  1  0  1  3  1  1 23   3.9443     503
  1  2  1 23  1  0  1  3  1  1 10   3.9443     503
  3  2  1 23 -1  0 -1  1  1  1 10   3.9443     503
  1  2  1 10  1  0  1  3  2  1 23   3.9443     504
  3  2  1 23 -1  0 -1  1  2  1 10   3.9443     504
  1  1  1 23  1  0  1  3  1  1 10   3.9443     501
  3  1  1 10 -1  0 -1  1  1  1 23   3.9443     501
  1  1  1 23  1  0  1  3  2  1 10   3.9443     502
  2  1  1 23 -1  1  0  4  2  1 10   3.9443     502
  4  1  1 10  1 -1  0  2  2  1 23   3.9443     502
  2  2  1 23 -1  1  0  4  1  1 10   3.9443     503
  3  2  1 10 -1  0 -1  1  1  1 23   3.9443     503
  4  2  1 10  1 -1  0  2  1  1 23   3.9443     503
  1  2  1 23  1  0  1  3  2  1 10   3.9443     504
  3  2  1 10 -1  0 -1  1  2  1 23   3.9443     504
  2  1  1 23 -1  1  0  4  1  1 10   3.9443     501
  4  1  1 10  1 -1  0  2  1  1 23   3.9443     501
  1  1  1 19  0  0  0  4  2  1  6   3.9456     502
  2  1  1 19  0  0  1  3  2  1  6   3.9456     502
  3  2  1  6  0  0 -1  2  1  1 19   3.9456     503
  4  2  1  6  0  0  0  1  1  1 19   3.9456     503
  1  2  1 19  0  0  0  4  2  1  6   3.9456     504
  2  2  1 19  0  0  1  3  2  1  6   3.9456     504
  3  2  1  6  0  0 -1  2  2  1 19   3.9456     504
  4  2  1  6  0  0  0  1  2  1 19   3.9456     504
  1  1  1  6  0  0  1  4  1  1 19   3.9456     501
  1  1  1 19  0  0  0  4  1  1  6   3.9456     501
  2  1  1  6  0  0  0  3  1  1 19   3.9456     501
  2  1  1 19  0  0  1  3  1  1  6   3.9456     501
  3  1  1  6  0  0 -1  2  1  1 19   3.9456     501
  3  1  1 19  0  0  0  2  1  1  6   3.9456     501
  4  1  1  6  0  0  0  1  1  1 19   3.9456     501
  4  1  1 19  0  0 -1  1  1  1  6   3.9456     501
  1  1  1  6  0  0  1  4  2  1 19   3.9456     502
  3  1  1  6  0  0 -1  2  2  1 19   3.9456     502
  3  1  1 19  0  0  0  2  2  1  6   3.9456     502
  4  1  1  6  0  0  0  1  2  1 19   3.9456     502
  4  1  1 19  0  0 -1  1  2  1  6   3.9456     502
  1  2  1  6  0  0  1  4  1  1 19   3.9456     503
  1  2  1 19  0  0  0  4  1  1  6   3.9456     503
  2  2  1  6  0  0  0  3  1  1 19   3.9456     503
  2  2  1 19  0  0  1  3  1  1  6   3.9456     503
  4  2  1 19  0  0 -1  1  1  1  6   3.9456     503
  1  2  1  6  0  0  1  4  2  1 19   3.9456     504
  4  2  1 19  0  0 -1  1  2  1  6   3.9456     504
  2  1  1  6  0  0  0  3  2  1 19   3.9456     502
  3  2  1 19  0  0  0  2  1  1  6   3.9456     503
  2  2  1  6  0  0  0  3  2  1 19   3.9456     504
  3  2  1 19  0  0  0  2  2  1  6   3.9456     504
  4  1  1 12  1  0  0  3  2  1 26   3.9491     506
  3  2  1 26 -1  0  0  4  1  1 12   3.9491     507
  1  1  1 12  1 -1  0  2  2  1 26   3.9491     506
  2  1  1 12 -1  0  0  1  2  1 26   3.9491     506
  3  1  1 12 -1  1  0  4  2  1 26   3.9491     506
  1  2  1 26  1  0  0  2  1  1 12   3.9491     507
  2  2  1 26 -1  1  0  1  1  1 12   3.9491     507
  4  2  1 26  1 -1  0  3  1  1 12   3.9491     507
  1  2  1 12  1 -1  0  2  2  1 26   3.9491     508
  1  2  1 26  1  0  0  2  2  1 12   3.9491     508
  2  2  1 12 -1  0  0  1  2  1 26   3.9491     508
  2  2  1 26 -1  1  0  1  2  1 12   3.9491     508
  3  2  1 12 -1  1  0  4  2  1 26   3.9491     508
  3  2  1 26 -1  0  0  4  2  1 12   3.9491     508
  4  2  1 12  1  0  0  3  2  1 26   3.9491     508
  4  2  1 26  1 -1  0  3  2  1 12   3.9491     508
  3  1  1 25 -1  1  0  4  1  1 18   3.9604     509
  4  1  1 18  1 -1  0  3  1  1 25   3.9604     509
  4  1  1 18  1 -1  0  3  2  1 25   3.9604     510
  3  2  1 25 -1  1  0  4  1  1 18   3.9604     511
  3  1  1 25 -1  1  0  4  2  1 18   3.9605     510
  4  2  1 18  1 -1  0  3  1  1 25   3.9605     511
  3  2  1 25 -1  1  0  4  2  1 18   3.9605     512
  4  2  1 18  1 -1  0  3  2  1 25   3.9605     512
  1  1  1 18  1  0  0  2  1  1 25   3.9605     509
  1  1  1 25  1 -1  0  2  1  1 18   3.9605     509
  2  1  1 18 -1  1  0  1  1  1 25   3.9605     509
  2  1  1 25 -1  0  0  1  1  1 18   3.9605     509
  3  1  1 18 -1  0  0  4  1  1 25   3.9605     509
  4  1  1 25  1  0  0  3  1  1 18   3.9605     509
  1  1  1 25  1 -1  0  2  2  1 18   3.9605     510
  2  1  1 18 -1  1  0  1  2  1 25   3.9605     510
  2  1  1 25 -1  0  0  1  2  1 18   3.9605     510
  1  2  1 18  1  0  0  2  1  1 25   3.9605     511
  1  2  1 25  1 -1  0  2  1  1 18   3.9605     511
  2  2  1 18 -1  1  0  1  1  1 25   3.9605     511
  1  2  1 25  1 -1  0  2  2  1 18   3.9605     512
  2  2  1 18 -1  1  0  1  2  1 25   3.9605     512
  1  1  1 18  1  0  0  2  2  1 25   3.9605     510
  4  1  1 25  1  0  0  3  2  1 18   3.9605     510
  2  2  1 25 -1  0  0  1  1  1 18   3.9605     511
  3  2  1 18 -1  0  0  4  1  1 25   3.9605     511
  1  2  1 18  1  0  0  2  2  1 25   3.9605     512
  2  2  1 25 -1  0  0  1  2  1 18   3.9605     512
  3  1  1 18 -1  0  0  4  2  1 25   3.9605     510
  4  2  1 25  1  0  0  3  1  1 18   3.9605     511
  3  2  1 18 -1  0  0  4  2  1 25   3.9605     512
  4  2  1 25  1  0  0  3  2  1 18   3.9605     512
  2  1  1 11  1  0  0  2  1  1 21   3.9686     513
  2  1  1 21 -1  0  0  2  1  1 11   3.9686     513
  2  1  1 21 -1  0  0  2  2  1 11   3.9686     514
  2  2  1 11  1  0  0  2  1  1 21   3.9686     515
  1  1  1 11 -1  0  0  1  1  1 21   3.9686     513
  1  1  1 21  1  0  0  1  1  1 11   3.9686     513
  3  1  1 11  1  0  0  3  1  1 21   3.9686     513
  3  1  1 21 -1  0  0  3  1  1 11   3.9686     513
  1  1  1 21  1  0  0  1  2  1 11   3.9686     514
  4  1  1 21  1  0  0  4  2  1 11   3.9686     514
  1  2  1 11 -1  0  0  1  1  1 21   3.9686     515
  4  2  1 11 -1  0  0  4  1  1 21   3.9686     515
  3  1  1 21 -1  0  0  3  2  1 11   3.9687     514
  3  2  1 11  1  0  0  3  1  1 21   3.9687     515
  4  1  1 11 -1  0  0  4  1  1 21   3.9687     513
  4  1  1 21  1  0  0  4  1  1 11   3.9687     513
  3  1  1 21 -1  0  0  4  1  1 20   3.9717     513
  4  1  1 20  1  0  0  3  1  1 21   3.9717     513
  1  1  1 20  1 -1  0  2  1  1 21   3.9717     513
  2  1  1 21 -1  1  0  1  1  1 20   3.9717     513
  1  1  1 21  1  0  0  2  1  1 20   3.9717     513
  2  1  1 20 -1  0  0  1  1  1 21   3.9717     513
  3  1  1 20 -1  1  0  4  1  1 21   3.9717     513
  4  1  1 21  1 -1  0  3  1  1 20   3.9717     513
  1  1  1  6  1 -1  1  3  2  1 20   3.9740     518
  3  2  1 20 -1  1 -1  1  1  1  6   3.9740     519
  1  2  1  6  1 -1  1  3  2  1 20   3.9740     520
  3  2  1 20 -1  1 -1  1  2  1  6   3.9740     520
  3  1  1  6 -1  1 -1  1  2  1 20   3.9740     518
  1  2  1 20  1 -1  1  3  1  1  6   3.9740     519
  1  2  1 20  1 -1  1  3  2  1  6   3.9740     520
  3  2  1  6 -1  1 -1  1  2  1 20   3.9740     520
  2  1  1  6 -1  0  0  4  2  1 20   3.9740     518
  4  2  1 20  1  0  0  2  1  1  6   3.9740     519
  4  1  1  6  1  0  0  2  2  1 20   3.9740     518
  2  2  1 20 -1  0  0  4  1  1  6   3.9740     519
  2  2  1  6 -1  0  0  4  2  1 20   3.9740     520
  2  2  1 20 -1  0  0  4  2  1  6   3.9740     520
  4  2  1  6  1  0  0  2  2  1 20   3.9740     520
  4  2  1 20  1  0  0  2  2  1  6   3.9740     520
  2  1  1  4 -1  0  0  2  2  1 20   3.9746     518
  2  2  1 20  1  0  0  2  1  1  4   3.9746     519
  1  1  1  4  1  0  0  1  2  1 20   3.9746     518
  4  1  1  4  1  0  0  4  2  1 20   3.9746     518
  4  2  1 20 -1  0  0  4  1  1  4   3.9746     519
  2  2  1  4 -1  0  0  2  2  1 20   3.9746     520
  2  2  1 20  1  0  0  2  2  1  4   3.9746     520
  4  2  1  4  1  0  0  4  2  1 20   3.9746     520
  4  2  1 20 -1  0  0  4  2  1  4   3.9746     520
  3  1  1  4 -1  0  0  3  2  1 20   3.9746     518
  1  2  1 20 -1  0  0  1  1  1  4   3.9746     519
  3  2  1 20  1  0  0  3  1  1  4   3.9746     519
  1  2  1  4  1  0  0  1  2  1 20   3.9746     520
  1  2  1 20 -1  0  0  1  2  1  4   3.9746     520
  3  2  1  4 -1  0  0  3  2  1 20   3.9746     520
  3  2  1 20  1  0  0  3  2  1  4   3.9746     520
  2  1  1 26 -1  1  0  4  1  1 22   3.9770     517
  4  1  1 22  1 -1  0  2  1  1 26   3.9770     517
  1  1  1 26  1  0  1  3  2  1 22   3.9770     518
  2  1  1 26 -1  1  0  4  2  1 22   3.9770     518
  3  2  1 22 -1  0 -1  1  1  1 26   3.9770     519
  4  2  1 22  1 -1  0  2  1  1 26   3.9770     519
  1  1  1 22  1  0  1  3  1  1 26   3.9771     517
  1  1  1 26  1  0  1  3  1  1 22   3.9771     517
  3  1  1 22 -1  0 -1  1  1  1 26   3.9771     517
  3  1  1 26 -1  0 -1  1  1  1 22   3.9771     517
  3  1  1 26 -1  0 -1  1  2  1 22   3.9771     518
  1  2  1 22  1  0  1  3  1  1 26   3.9771     519
  4  1  1 26  1 -1  0  2  2  1 22   3.9771     518
  2  2  1 22 -1  1  0  4  1  1 26   3.9771     519
  2  1  1 22 -1  1  0  4  1  1 26   3.9771     517
  4  1  1 26  1 -1  0  2  1  1 22   3.9771     517
  2  1  1 28  0  0  0  3  1  1 14   3.9776     517
  3  1  1 14  0  0  0  2  1  1 28   3.9776     517
  4  1  1 14  0  0 -1  1  1  1 28   3.9776     517
  1  1  1 28  0  0  1  4  2  1 14   3.9776     518
  4  2  1 14  0  0 -1  1  1  1 28   3.9776     519
  1  1  1 14  0  0  0  4  1  1 28   3.9776     517
  1  1  1 28  0  0  1  4  1  1 14   3.9776     517
  2  1  1 14  0  0  1  3  1  1 28   3.9776     517
  3  1  1 28  0  0 -1  2  1  1 14   3.9776     517
  4  1  1 28  0  0  0  1  1  1 14   3.9776     517
  2  1  1 28  0  0  0  3  2  1 14   3.9776     518
  3  1  1 28  0  0 -1  2  2  1 14   3.9776     518
  4  1  1 28  0  0  0  1  2  1 14   3.9776     518
  1  2  1 14  0  0  0  4  1  1 28   3.9776     519
  2  2  1 14  0  0  1  3  1  1 28   3.9776     519
  3  2  1 14  0  0  0  2  1  1 28   3.9776     519
  3  1  1 14 -1  0  0  4  1  1 27   3.9781     517
  4  1  1 27  1  0  0  3  1  1 14   3.9781     517
  1  1  1 27  1 -1  0  2  1  1 14   3.9781     517
  2  1  1 14 -1  1  0  1  1  1 27   3.9781     517
  3  1  1 27 -1  1  0  4  1  1 14   3.9781     517
  4  1  1 14  1 -1  0  3  1  1 27   3.9781     517
  3  1  1 27 -1  1  0  4  2  1 14   3.9781     518
  4  1  1 27  1  0  0  3  2  1 14   3.9781     518
  3  2  1 14 -1  0  0  4  1  1 27   3.9781     519
  4  2  1 14  1 -1  0  3  1  1 27   3.9781     519
  1  1  1 14  1  0  0  2  1  1 27   3.9781     517
  2  1  1 27 -1  0  0  1  1  1 14   3.9781     517
  1  1  1 27  1 -1  0  2  2  1 14   3.9781     518
  2  1  1 27 -1  0  0  1  2  1 14   3.9781     518
  1  2  1 14  1  0  0  2  1  1 27   3.9781     519
  2  2  1 14 -1  1  0  1  1  1 27   3.9781     519
  2  2  1 12  1  0  0  2  2  1 26   3.9821     524
  2  2  1 26 -1  0  0  2  2  1 12   3.9821     524
  1  1  1 12 -1  0  0  1  2  1 26   3.9821     522
  2  1  1 12  1  0  0  2  2  1 26   3.9821     522
  1  2  1 26  1  0  0  1  1  1 12   3.9821     523
  2  2  1 26 -1  0  0  2  1  1 12   3.9821     523
  1  2  1 12 -1  0  0  1  2  1 26   3.9821     524
  1  2  1 26  1  0  0  1  2  1 12   3.9821     524
  4  2  1 12 -1  0  0  4  2  1 26   3.9821     524
  4  2  1 26  1  0  0  4  2  1 12   3.9821     524
  3  1  1 12  1  0  0  3  2  1 26   3.9821     522
  3  2  1 26 -1  0  0  3  1  1 12   3.9821     523
  3  2  1 12  1  0  0  3  2  1 26   3.9821     524
  3  2  1 26 -1  0  0  3  2  1 12   3.9821     524
  4  1  1 12 -1  0  0  4  2  1 26   3.9821     522
  4  2  1 26  1  0  0  4  1  1 12   3.9821     523
  4  1  1 25  0  0  0  1  2  1 27   3.9829     522
  1  2  1 27  0  0  0  4  1  1 25   3.9829     523
  2  2  1 27  0  0  1  3  1  1 25   3.9829     523
  2  2  1 27  0  0  1  3  2  1 25   3.9829     524
  3  2  1 25  0  0 -1  2  2  1 27   3.9829     524
  1  1  1 25  0  0  1  4  2  1 27   3.9829     522
  2  1  1 25  0  0  0  3  2  1 27   3.9829     522
  3  1  1 25  0  0 -1  2  2  1 27   3.9829     522
  3  2  1 27  0  0  0  2  1  1 25   3.9829     523
  4  2  1 27  0  0 -1  1  1  1 25   3.9829     523
  1  2  1 25  0  0  1  4  2  1 27   3.9829     524
  1  2  1 27  0  0  0  4  2  1 25   3.9829     524
  2  2  1 25  0  0  0  3  2  1 27   3.9829     524
  3  2  1 27  0  0  0  2  2  1 25   3.9829     524
  4  2  1 25  0  0  0  1  2  1 27   3.9829     524
  4  2  1 27  0  0 -1  1  2  1 25   3.9829     524
  1  1  1  6  1 -1  1  3  1  1 20   3.9830     521
  2  1  1  6 -1  0  0  4  1  1 20   3.9830     521
  3  1  1  6 -1  1 -1  1  1  1 20   3.9830     521
  3  1  1 20 -1  1 -1  1  1  1  6   3.9830     521
  4  1  1 20  1  0  0  2  1  1  6   3.9830     521
  1  1  1 20  1 -1  1  3  2  1  6   3.9830     522
  1  2  1  6  1 -1  1  3  1  1 20   3.9830     523
  3  2  1  6 -1  1 -1  1  1  1 20   3.9830     523
  1  1  1 20  1 -1  1  3  1  1  6   3.9831     521
  3  1  1 20 -1  1 -1  1  2  1  6   3.9831     522
  4  1  1 20  1  0  0  2  2  1  6   3.9831     522
  2  2  1  6 -1  0  0  4  1  1 20   3.9831     523
  2  1  1 20 -1  0  0  4  1  1  6   3.9831     521
  4  1  1  6  1  0  0  2  1  1 20   3.9831     521
  2  1  1 20 -1  0  0  4  2  1  6   3.9831     522
  4  2  1  6  1  0  0  2  1  1 20   3.9831     523
  4  1  1 13  1  0  0  3  2  1 28   3.9848     522
  3  2  1 28 -1  0  0  4  1  1 13   3.9848     523
  2  1  1 13 -1  0  0  1  2  1 28   3.9848     522
  3  1  1 13 -1  1  0  4  2  1 28   3.9848     522
  1  2  1 28  1  0  0  2  1  1 13   3.9848     523
  4  2  1 28  1 -1  0  3  1  1 13   3.9848     523
  1  2  1 28  1  0  0  2  2  1 13   3.9848     524
  2  2  1 13 -1  0  0  1  2  1 28   3.9848     524
  3  2  1 28 -1  0  0  4  2  1 13   3.9848     524
  4  2  1 13  1  0  0  3  2  1 28   3.9848     524
  1  1  1 13  1 -1  0  2  2  1 28   3.9848     522
  2  2  1 28 -1  1  0  1  1  1 13   3.9848     523
  1  2  1 13  1 -1  0  2  2  1 28   3.9848     524
  2  2  1 28 -1  1  0  1  2  1 13   3.9848     524
  3  2  1 13 -1  1  0  4  2  1 28   3.9848     524
  4  2  1 28  1 -1  0  3  2  1 13   3.9848     524
  4  1  1 17  1  0  0  3  2  1 28   3.9858     522
  3  2  1 28 -1  0  0  4  1  1 17   3.9858     523
  1  2  1 28  1  0  0  2  2  1 17   3.9858     524
  2  2  1 17 -1  0  0  1  2  1 28   3.9858     524
  3  2  1 17 -1  1  0  4  2  1 28   3.9858     524
  3  2  1 28 -1  0  0  4  2  1 17   3.9858     524
  4  2  1 17  1  0  0  3  2  1 28   3.9858     524
  4  2  1 28  1 -1  0  3  2  1 17   3.9858     524
  1  1  1 17  1 -1  0  2  2  1 28   3.9858     522
  2  1  1 17 -1  0  0  1  2  1 28   3.9858     522
  3  1  1 17 -1  1  0  4  2  1 28   3.9858     522
  1  2  1 28  1  0  0  2  1  1 17   3.9858     523
  2  2  1 28 -1  1  0  1  1  1 17   3.9858     523
  4  2  1 28  1 -1  0  3  1  1 17   3.9858     523
  1  2  1 17  1 -1  0  2  2  1 28   3.9858     524
  2  2  1 28 -1  1  0  1  2  1 17   3.9858     524
  2  2  1 28 -1  1  0  4  2  1 24   3.9922     528
  4  2  1 24  1 -1  0  2  2  1 28   3.9922     528
  4  1  1 24  1 -1  0  2  2  1 28   3.9922     526
  2  2  1 28 -1  1  0  4  1  1 24   3.9922     527
  1  1  1 24  1  0  1  3  2  1 28   3.9922     526
  3  1  1 24 -1  0 -1  1  2  1 28   3.9922     526
  1  2  1 28  1  0  1  3  1  1 24   3.9922     527
  3  2  1 28 -1  0 -1  1  1  1 24   3.9922     527
  1  2  1 24  1  0  1  3  2  1 28   3.9922     528
  1  2  1 28  1  0  1  3  2  1 24   3.9922     528
  3  2  1 24 -1  0 -1  1  2  1 28   3.9922     528
  3  2  1 28 -1  0 -1  1  2  1 24   3.9922     528
  2  1  1 24 -1  1  0  4  2  1 28   3.9922     526
  4  2  1 28  1 -1  0  2  1  1 24   3.9922     527
  2  2  1 24 -1  1  0  4  2  1 28   3.9922     528
  4  2  1 28  1 -1  0  2  2  1 24   3.9922     528
  1  1  1  9  1 -1  0  2  2  1 21   3.9925     526
  2  1  1  9 -1  0  0  1  2  1 21   3.9925     526
  3  1  1  9 -1  1  0  4  2  1 21   3.9925     526
  4  1  1  9  1  0  0  3  2  1 21   3.9925     526
  1  2  1 21  1  0  0  2  1  1  9   3.9925     527
  2  2  1 21 -1  1  0  1  1  1  9   3.9925     527
  3  2  1 21 -1  0  0  4  1  1  9   3.9925     527
  4  2  1 21  1 -1  0  3  1  1  9   3.9925     527
  1  2  1  9  1 -1  0  2  2  1 21   3.9925     528
  2  2  1 21 -1  1  0  1  2  1  9   3.9925     528
  1  2  1 21  1  0  0  2  2  1  9   3.9925     528
  2  2  1  9 -1  0  0  1  2  1 21   3.9925     528
  3  2  1  9 -1  1  0  4  2  1 21   3.9925     528
  3  2  1 21 -1  0  0  4  2  1  9   3.9925     528
  4  2  1  9  1  0  0  3  2  1 21   3.9925     528
  4  2  1 21  1 -1  0  3  2  1  9   3.9925     528
  3  1  1  7 -1  1  0  4  1  1 13   3.9929     525
  4  1  1 13  1 -1  0  3  1  1  7   3.9929     525
  3  1  1  7 -1  1  0  4  2  1 13   3.9929     526
  4  1  1 13  1 -1  0  3  2  1  7   3.9929     526
  3  2  1  7 -1  1  0  4  1  1 13   3.9929     527
  4  2  1 13  1 -1  0  3  1  1  7   3.9929     527
  1  1  1  7  1 -1  0  2  1  1 13   3.9929     525
  1  1  1 13  1  0  0  2  1  1  7   3.9929     525
  2  1  1  7 -1  0  0  1  1  1 13   3.9929     525
  2  1  1 13 -1  1  0  1  1  1  7   3.9929     525
  3  1  1 13 -1  0  0  4  1  1  7   3.9929     525
  4  1  1  7  1  0  0  3  1  1 13   3.9929     525
  1  1  1  7  1 -1  0  2  2  1 13   3.9929     526
  2  1  1  7 -1  0  0  1  2  1 13   3.9929     526
  2  1  1 13 -1  1  0  1  2  1  7   3.9929     526
  1  2  1  7  1 -1  0  2  1  1 13   3.9929     527
  1  2  1 13  1  0  0  2  1  1  7   3.9929     527
  2  2  1 13 -1  1  0  1  1  1  7   3.9929     527
  1  2  1  7  1 -1  0  2  2  1 13   3.9929     528
  2  2  1 13 -1  1  0  1  2  1  7   3.9929     528
  3  2  1  7 -1  1  0  4  2  1 13   3.9929     528
  4  2  1 13  1 -1  0  3  2  1  7   3.9929     528
  1  1  1 13  1  0  0  2  2  1  7   3.9929     526
  3  1  1 13 -1  0  0  4  2  1  7   3.9929     526
  4  1  1  7  1  0  0  3  2  1 13   3.9929     526
  2  2  1  7 -1  0  0  1  1  1 13   3.9929     527
  3  2  1 13 -1  0  0  4  1  1  7   3.9929     527
  4  2  1  7  1  0  0  3  1  1 13   3.9929     527
  1  2  1 13  1  0  0  2  2  1  7   3.9929     528
  2  2  1  7 -1  0  0  1  2  1 13   3.9929     528
  3  2  1 13 -1  0  0  4  2  1  7   3.9929     528
  4  2  1  7  1  0  0  3  2  1 13   3.9929     528
  1  1  1 26  0  0  1  4  1  1 17   3.9935     525
  2  1  1 26  0  0  0  3  1  1 17   3.9935     525
  3  1  1 17  0  0  0  2  1  1 26   3.9935     525
  4  1  1 17  0  0 -1  1  1  1 26   3.9935     525
  2  1  1 26  0  0  0  3  2  1 17   3.9935     526
  3  2  1 17  0  0  0  2  1  1 26   3.9935     527
  1  1  1 26  0  0  1  4  2  1 17   3.9935     526
  4  2  1 17  0  0 -1  1  1  1 26   3.9935     527
  1  1  1 17  0  0  0  4  1  1 26   3.9935     525
  2  1  1 17  0  0  1  3  1  1 26   3.9935     525
  3  1  1 26  0  0 -1  2  1  1 17   3.9935     525
  4  1  1 26  0  0  0  1  1  1 17   3.9935     525
  3  1  1 26  0  0 -1  2  2  1 17   3.9935     526
  4  1  1 26  0  0  0  1  2  1 17   3.9935     526
  1  2  1 17  0  0  0  4  1  1 26   3.9935     527
  2  2  1 17  0  0  1  3  1  1 26   3.9935     527
  2  1  1 21 -2  1  0  4  1  1 22   3.9941     525
  2  1  1 22 -2  1  0  4  1  1 21   3.9941     525
  4  1  1 21  2 -1  0  2  1  1 22   3.9941     525
  4  1  1 22  2 -1  0  2  1  1 21   3.9941     525
  4  1  1 21  2 -1  0  2  2  1 22   3.9941     526
  2  2  1 22 -2  1  0  4  1  1 21   3.9941     527
  1  1  1 21  2  0  1  3  2  1 22   3.9941     526
  2  1  1 21 -2  1  0  4  2  1 22   3.9941     526
  3  2  1 22 -2  0 -1  1  1  1 21   3.9941     527
  4  2  1 22  2 -1  0  2  1  1 21   3.9941     527
  1  1  1 21  2  0  1  3  1  1 22   3.9941     525
  1  1  1 22  2  0  1  3  1  1 21   3.9941     525
  3  1  1 21 -2  0 -1  1  1  1 22   3.9941     525
  3  1  1 22 -2  0 -1  1  1  1 21   3.9941     525
  3  1  1 21 -2  0 -1  1  2  1 22   3.9941     526
  1  2  1 22  2  0  1  3  1  1 21   3.9941     527
  1  1  1 22  2  0  1  3  2  1 21   4.0040     530
  2  1  1 22 -2  1  0  4  2  1 21   4.0040     530
  4  1  1 22  2 -1  0  2  2  1 21   4.0040     530
  2  2  1 21 -2  1  0  4  1  1 22   4.0040     531
  3  2  1 21 -2  0 -1  1  1  1 22   4.0040     531
  4  2  1 21  2 -1  0  2  1  1 22   4.0040     531
  1  2  1 22  2  0  1  3  2  1 21   4.0040     532
  2  2  1 22 -2  1  0  4  2  1 21   4.0040     532
  3  2  1 21 -2  0 -1  1  2  1 22   4.0040     532
  4  2  1 21  2 -1  0  2  2  1 22   4.0040     532
  1  2  1 21  2  0  1  3  2  1 22   4.0040     532
  2  2  1 21 -2  1  0  4  2  1 22   4.0040     532
  3  2  1 22 -2  0 -1  1  2  1 21   4.0040     532
  4  2  1 22  2 -1  0  2  2  1 21   4.0040     532
  3  1  1 22 -2  0 -1  1  2  1 21   4.0041     530
  1  2  1 21  2  0  1  3  1  1 22   4.0041     531
  2  1  1  6 -1  0  0  3  1  1 12   4.0048     529
  3  1  1 12  1  0  0  2  1  1  6   4.0048     529
  3  1  1 12  1  0  0  2  2  1  6   4.0048     530
  2  2  1  6 -1  0  0  3  1  1 12   4.0048     531
  1  1  1  6  1  0  1  4  1  1 12   4.0048     529
  1  1  1 12 -1  0  0  4  1  1  6   4.0048     529
  4  1  1  6  1  0  0  1  1  1 12   4.0048     529
  4  1  1 12 -1  0 -1  1  1  1  6   4.0048     529
  1  1  1  6  1  0  1  4  2  1 12   4.0048     530
  2  1  1  6 -1  0  0  3  2  1 12   4.0048     530
  2  1  1 12  1  0  1  3  2  1  6   4.0048     530
  3  1  1  6 -1  0 -1  2  2  1 12   4.0048     530
  4  1  1  6  1  0  0  1  2  1 12   4.0048     530
  4  1  1 12 -1  0 -1  1  2  1  6   4.0048     530
  1  2  1  6  1  0  1  4  1  1 12   4.0048     531
  1  2  1 12 -1  0  0  4  1  1  6   4.0048     531
  2  2  1 12  1  0  1  3  1  1  6   4.0048     531
  3  2  1  6 -1  0 -1  2  1  1 12   4.0048     531
  3  2  1 12  1  0  0  2  1  1  6   4.0048     531
  4  2  1 12 -1  0 -1  1  1  1  6   4.0048     531
  1  2  1  6  1  0  1  4  2  1 12   4.0048     532
  2  2  1  6 -1  0  0  3  2  1 12   4.0048     532
  2  2  1 12  1  0  1  3  2  1  6   4.0048     532
  3  2  1  6 -1  0 -1  2  2  1 12   4.0048     532
  3  2  1 12  1  0  0  2  2  1  6   4.0048     532
  4  2  1 12 -1  0 -1  1  2  1  6   4.0048     532
  2  1  1 12  1  0  1  3  1  1  6   4.0048     529
  3  1  1  6 -1  0 -1  2  1  1 12   4.0048     529
  1  1  1 12 -1  0  0  4  2  1  6   4.0048     530
  4  2  1  6  1  0  0  1  1  1 12   4.0048     531
  1  2  1 12 -1  0  0  4  2  1  6   4.0048     532
  4  2  1  6  1  0  0  1  2  1 12   4.0048     532
  2  1  1 28 -1  1  0  4  1  1  2   4.0099     533
  4  1  1  2  1 -1  0  2  1  1 28   4.0099     533
  2  1  1 28 -1  1  0  4  2  1  2   4.0099     534
  4  2  1  2  1 -1  0  2  1  1 28   4.0099     535
  1  1  1  2  1  0  1  3  1  1 28   4.0099     533
  3  1  1 28 -1  0 -1  1  1  1  2   4.0099     533
  1  1  1 28  1  0  1  3  2  1  2   4.0099     534
  3  1  1 28 -1  0 -1  1  2  1  2   4.0099     534
  1  2  1  2  1  0  1  3  1  1 28   4.0099     535
  3  2  1  2 -1  0 -1  1  1  1 28   4.0099     535
  1  1  1 28  1  0  1  3  1  1  2   4.0099     533
  2  1  1  2 -1  1  0  4  1  1 28   4.0099     533
  3  1  1  2 -1  0 -1  1  1  1 28   4.0099     533
  4  1  1 28  1 -1  0  2  1  1  2   4.0099     533
  4  1  1 28  1 -1  0  2  2  1  2   4.0099     534
  2  2  1  2 -1  1  0  4  1  1 28   4.0099     535
  1  1  1  7  0  0  1  4  1  1 13   4.0109     533
  4  1  1 13  0  0 -1  1  1  1  7   4.0109     533
  1  1  1 13  0  0  0  4  2  1  7   4.0109     534
  4  1  1 13  0  0 -1  1  2  1  7   4.0109     534
  1  2  1  7  0  0  1  4  1  1 13   4.0109     535
  4  2  1  7  0  0  0  1  1  1 13   4.0109     535
  1  2  1 13  0  0  0  4  2  1  7   4.0109     536
  4  2  1  7  0  0  0  1  2  1 13   4.0109     536
  1  1  1 13  0  0  0  4  1  1  7   4.0109     533
  2  1  1  7  0  0  0  3  1  1 13   4.0109     533
  2  1  1 13  0  0  1  3  1  1  7   4.0109     533
  3  1  1 13  0  0  0  2  1  1  7   4.0109     533
  4  1  1  7  0  0  0  1  1  1 13   4.0109     533
  1  1  1  7  0  0  1  4  2  1 13   4.0109     534
  2  1  1  7  0  0  0  3  2  1 13   4.0109     534
  2  1  1 13  0  0  1  3  2  1  7   4.0109     534
  3  1  1 13  0  0  0  2  2  1  7   4.0109     534
  4  1  1  7  0  0  0  1  2  1 13   4.0109     534
  1  2  1 13  0  0  0  4  1  1  7   4.0109     535
  2  2  1  7  0  0  0  3  1  1 13   4.0109     535
  3  2  1  7  0  0 -1  2  1  1 13   4.0109     535
  3  2  1 13  0  0  0  2  1  1  7   4.0109     535
  4  2  1 13  0  0 -1  1  1  1  7   4.0109     535
  1  2  1  7  0  0  1  4  2  1 13   4.0109     536
  2  2  1  7  0  0  0  3  2  1 13   4.0109     536
  2  2  1 13  0  0  1  3  2  1  7   4.0109     536
  3  2  1  7  0  0 -1  2  2  1 13   4.0109     536
  3  2  1 13  0  0  0  2  2  1  7   4.0109     536
  4  2  1 13  0  0 -1  1  2  1  7   4.0109     536
  3  1  1  7  0  0 -1  2  1  1 13   4.0109     533
  3  1  1  7  0  0 -1  2  2  1 13   4.0109     534
  2  2  1 13  0  0  1  3  1  1  7   4.0109     535
  4  2  1 11 -1  0  0  4  2  1 21   4.0121     536
  4  2  1 21  1  0  0  4  2  1 11   4.0121     536
  1  1  1 11 -1  0  0  1  2  1 21   4.0121     534
  2  1  1 11  1  0  0  2  2  1 21   4.0121     534
  1  2  1 21  1  0  0  1  1  1 11   4.0121     535
  2  2  1 21 -1  0  0  2  1  1 11   4.0121     535
  1  2  1 11 -1  0  0  1  2  1 21   4.0121     536
  1  2  1 21  1  0  0  1  2  1 11   4.0121     536
  2  2  1 11  1  0  0  2  2  1 21   4.0121     536
  2  2  1 21 -1  0  0  2  2  1 11   4.0121     536
  3  1  1 11  1  0  0  3  2  1 21   4.0121     534
  4  1  1 11 -1  0  0  4  2  1 21   4.0121     534
  3  2  1 21 -1  0  0  3  1  1 11   4.0121     535
  4  2  1 21  1  0  0  4  1  1 11   4.0121     535
  3  2  1 11  1  0  0  3  2  1 21   4.0121     536
  3  2  1 21 -1  0  0  3  2  1 11   4.0121     536
  1  1  1 14  0  0  0  4  2  1  6   4.0171     538
  4  2  1  6  0  0  0  1  1  1 14   4.0171     539
  1  2  1 14  0  0  0  4  2  1  6   4.0171     540
  4  2  1  6  0  0  0  1  2  1 14   4.0171     540
  1  1  1  6  0  0  1  4  1  1 14   4.0171     537
  1  1  1 14  0  0  0  4  1  1  6   4.0171     537
  2  1  1  6  0  0  0  3  1  1 14   4.0171     537
  3  1  1 14  0  0  0  2  1  1  6   4.0171     537
  4  1  1  6  0  0  0  1  1  1 14   4.0171     537
  4  1  1 14  0  0 -1  1  1  1  6   4.0171     537
  2  1  1 14  0  0  1  3  2  1  6   4.0171     538
  3  1  1 14  0  0  0  2  2  1  6   4.0171     538
  4  1  1  6  0  0  0  1  2  1 14   4.0171     538
  4  1  1 14  0  0 -1  1  2  1  6   4.0171     538
  1  2  1  6  0  0  1  4  1  1 14   4.0171     539
  1  2  1 14  0  0  0  4  1  1  6   4.0171     539
  2  2  1  6  0  0  0  3  1  1 14   4.0171     539
  3  2  1  6  0  0 -1  2  1  1 14   4.0171     539
  2  2  1 14  0  0  1  3  2  1  6   4.0171     540
  3  2  1  6  0  0 -1  2  2  1 14   4.0171     540
  2  1  1 14  0  0  1  3  1  1  6   4.0172     537
  3  1  1  6  0  0 -1  2  1  1 14   4.0172     537
  1  1  1  6  0  0  1  4  2  1 14   4.0172     538
  2  1  1  6  0  0  0  3  2  1 14   4.0172     538
  3  1  1  6  0  0 -1  2  2  1 14   4.0172     538
  2  2  1 14  0  0  1  3  1  1  6   4.0172     539
  3  2  1 14  0  0  0  2  1  1  6   4.0172     539
  4  2  1 14  0  0 -1  1  1  1  6   4.0172     539
  1  2  1  6  0  0  1  4  2  1 14   4.0172     540
  2  2  1  6  0  0  0  3  2  1 14   4.0172     540
  3  2  1 14  0  0  0  2  2  1  6   4.0172     540
  4  2  1 14  0  0 -1  1  2  1  6   4.0172     540
  2  1  1  4 -1  0  0  2  1  1 20   4.0174     537
  2  1  1 20  1  0  0  2  1  1  4   4.0174     537
  1  1  1  4  1  0  0  1  1  1 20   4.0174     537
  1  1  1 20 -1  0  0  1  1  1  4   4.0174     537
  3  1  1  4 -1  0  0  3  1  1 20   4.0174     537
  3  1  1 20  1  0  0  3  1  1  4   4.0174     537
  1  1  1 20 -1  0  0  1  2  1  4   4.0174     538
  2  1  1 20  1  0  0  2  2  1  4   4.0174     538
  3  1  1 20  1  0  0  3  2  1  4   4.0174     538
  1  2  1  4  1  0  0  1  1  1 20   4.0174     539
  2  2  1  4 -1  0  0  2  1  1 20   4.0174     539
  4  1  1  4  1  0  0  4  1  1 20   4.0174     537
  4  1  1 20 -1  0  0  4  1  1  4   4.0174     537
  4  1  1 20 -1  0  0  4  2  1  4   4.0174     538
  3  2  1  4 -1  0  0  3  1  1 20   4.0174     539
  4  2  1  4  1  0  0  4  1  1 20   4.0174     539
  1  1  1 15  0  0  0  4  2  1  7   4.0177     538
  3  1  1 15  0  0  0  2  2  1  7   4.0177     538
  2  2  1  7  0  0  0  3  1  1 15   4.0177     539
  4  2  1  7  0  0  0  1  1  1 15   4.0177     539
  1  2  1 15  0  0  0  4  2  1  7   4.0177     540
  4  2  1  7  0  0  0  1  2  1 15   4.0177     540
  1  1  1 15  0  0  0  4  1  1  7   4.0177     537
  2  1  1  7  0  0  0  3  1  1 15   4.0177     537
  3  1  1 15  0  0  0  2  1  1  7   4.0177     537
  4  1  1  7  0  0  0  1  1  1 15   4.0177     537
  2  1  1 15  0  0  1  3  2  1  7   4.0177     538
  4  1  1  7  0  0  0  1  2  1 15   4.0177     538
  1  2  1 15  0  0  0  4  1  1  7   4.0177     539
  3  2  1  7  0  0 -1  2  1  1 15   4.0177     539
  2  2  1  7  0  0  0  3  2  1 15   4.0177     540
  3  2  1 15  0  0  0  2  2  1  7   4.0177     540
  1  1  1  7  0  0  1  4  1  1 15   4.0177     537
  2  1  1 15  0  0  1  3  1  1  7   4.0177     537
  3  1  1  7  0  0 -1  2  1  1 15   4.0177     537
  4  1  1 15  0  0 -1  1  1  1  7   4.0177     537
  1  1  1  7  0  0  1  4  2  1 15   4.0177     538
  2  1  1  7  0  0  0  3  2  1 15   4.0177     538
  3  1  1  7  0  0 -1  2  2  1 15   4.0177     538
  4  1  1 15  0  0 -1  1  2  1  7   4.0177     538
  1  2  1  7  0  0  1  4  1  1 15   4.0177     539
  2  2  1 15  0  0  1  3  1  1  7   4.0177     539
  3  2  1 15  0  0  0  2  1  1  7   4.0177     539
  4  2  1 15  0  0 -1  1  1  1  7   4.0177     539
  1  2  1  7  0  0  1  4  2  1 15   4.0177     540
  2  2  1 15  0  0  1  3  2  1  7   4.0177     540
  3  2  1  7  0  0 -1  2  2  1 15   4.0177     540
  4  2  1 15  0  0 -1  1  2  1  7   4.0177     540
  2  1  1 21 -1  1  0  1  2  1 20   4.0209     538
  3  1  1 21 -1  0  0  4  2  1 20   4.0209     538
  1  2  1 20  1 -1  0  2  1  1 21   4.0209     539
  4  2  1 20  1  0  0  3  1  1 21   4.0209     539
  4  1  1 21  1 -1  0  3  2  1 20   4.0209     538
  3  2  1 20 -1  1  0  4  1  1 21   4.0209     539
  1  1  1 21  1  0  0  2  2  1 20   4.0209     538
  2  2  1 20 -1  0  0  1  1  1 21   4.0209     539
  2  1  1 23 -1  0  0  4  1  1 27   4.0226     541
  4  1  1 27  1  0  0  2  1  1 23   4.0226     541
  1  1  1 23  1 -1  1  3  1  1 27   4.0226     541
  1  1  1 27  1 -1  1  3  1  1 23   4.0226     541
  3  1  1 23 -1  1 -1  1  1  1 27   4.0226     541
  3  1  1 27 -1  1 -1  1  1  1 23   4.0226     541
  1  1  1 27  1 -1  1  3  2  1 23   4.0226     542
  2  1  1 27 -1  0  0  4  2  1 23   4.0226     542
  3  1  1 27 -1  1 -1  1  2  1 23   4.0226     542
  4  1  1 27  1  0  0  2  2  1 23   4.0226     542
  1  2  1 23  1 -1  1  3  1  1 27   4.0226     543
  2  2  1 23 -1  0  0  4  1  1 27   4.0226     543
  3  2  1 23 -1  1 -1  1  1  1 27   4.0226     543
  4  2  1 23  1  0  0  2  1  1 27   4.0226     543
  2  1  1 27 -1  0  0  4  1  1 23   4.0226     541
  4  1  1 23  1  0  0  2  1  1 27   4.0226     541
  1  1  1 15  0  0  0  4  2  1  6   4.0329     546
  4  2  1  6  0  0  0  1  1  1 15   4.0329     547
  1  2  1 15  0  0  0  4  2  1  6   4.0329     548
  4  2  1  6  0  0  0  1  2  1 15   4.0329     548
  1  1  1 15  0  0  0  4  1  1  6   4.0329     545
  4  1  1  6  0  0  0  1  1  1 15   4.0329     545
  2  1  1 15  0  0  1  3  2  1  6   4.0329     546
  3  1  1 15  0  0  0  2  2  1  6   4.0329     546
  4  1  1  6  0  0  0  1  2  1 15   4.0329     546
  1  2  1 15  0  0  0  4  1  1  6   4.0329     547
  2  2  1  6  0  0  0  3  1  1 15   4.0329     547
  3  2  1  6  0  0 -1  2  1  1 15   4.0329     547
  1  1  1  6  0  0  1  4  1  1 15   4.0329     545
  2  1  1  6  0  0  0  3  1  1 15   4.0329     545
  2  1  1 15  0  0  1  3  1  1  6   4.0329     545
  3  1  1  6  0  0 -1  2  1  1 15   4.0329     545
  3  1  1 15  0  0  0  2  1  1  6   4.0329     545
  4  1  1 15  0  0 -1  1  1  1  6   4.0329     545
  4  1  1 15  0  0 -1  1  2  1  6   4.0329     546
  1  2  1  6  0  0  1  4  1  1 15   4.0329     547
  2  2  1  6  0  0  0  3  2  1 15   4.0329     548
  2  2  1 15  0  0  1  3  2  1  6   4.0329     548
  3  2  1  6  0  0 -1  2  2  1 15   4.0329     548
  3  2  1 15  0  0  0  2  2  1  6   4.0329     548
  1  1  1  6  0  0  1  4  2  1 15   4.0329     546
  2  1  1  6  0  0  0  3  2  1 15   4.0329     546
  3  1  1  6  0  0 -1  2  2  1 15   4.0329     546
  2  2  1 15  0  0  1  3  1  1  6   4.0329     547
  3  2  1 15  0  0  0  2  1  1  6   4.0329     547
  4  2  1 15  0  0 -1  1  1  1  6   4.0329     547
  1  2  1  6  0  0  1  4  2  1 15   4.0329     548
  4  2  1 15  0  0 -1  1  2  1  6   4.0329     548
  3  1  1  9 -1  1  0  4  1  1 18   4.0350     545
  4  1  1 18  1 -1  0  3  1  1  9   4.0350     545
  3  1  1  9 -1  1  0  4  2  1 18   4.0350     546
  4  1  1  9  1  0  0  3  2  1 18   4.0350     546
  4  1  1 18  1 -1  0  3  2  1  9   4.0350     546
  3  2  1  9 -1  1  0  4  1  1 18   4.0350     547
  3  2  1 18 -1  0  0  4  1  1  9   4.0350     547
  4  2  1 18  1 -1  0  3  1  1  9   4.0350     547
  3  2  1  9 -1  1  0  4  2  1 18   4.0350     548
  4  2  1 18  1 -1  0  3  2  1  9   4.0350     548
  1  1  1  9  1 -1  0  2  1  1 18   4.0351     545
  1  1  1 18  1  0  0  2  1  1  9   4.0351     545
  2  1  1  9 -1  0  0  1  1  1 18   4.0351     545
  2  1  1 18 -1  1  0  1  1  1  9   4.0351     545
  3  1  1 18 -1  0  0  4  1  1  9   4.0351     545
  4  1  1  9  1  0  0  3  1  1 18   4.0351     545
  1  1  1  9  1 -1  0  2  2  1 18   4.0351     546
  1  1  1 18  1  0  0  2  2  1  9   4.0351     546
  2  1  1  9 -1  0  0  1  2  1 18   4.0351     546
  2  1  1 18 -1  1  0  1  2  1  9   4.0351     546
  1  2  1  9  1 -1  0  2  1  1 18   4.0351     547
  1  2  1 18  1  0  0  2  1  1  9   4.0351     547
  2  2  1  9 -1  0  0  1  1  1 18   4.0351     547
  1  2  1 18  1  0  0  2  2  1  9   4.0351     548
  2  2  1  9 -1  0  0  1  2  1 18   4.0351     548
  3  1  1 18 -1  0  0  4  2  1  9   4.0351     546
  2  2  1 18 -1  1  0  1  1  1  9   4.0351     547
  4  2  1  9  1  0  0  3  1  1 18   4.0351     547
  1  2  1  9  1 -1  0  2  2  1 18   4.0351     548
  2  2  1 18 -1  1  0  1  2  1  9   4.0351     548
  3  2  1 18 -1  0  0  4  2  1  9   4.0351     548
  4  2  1  9  1  0  0  3  2  1 18   4.0351     548
  1  1  1  2  0  0  0  4  1  1  6   4.0359     545
  4  1  1  6  0  0  0  1  1  1  2   4.0359     545
  1  1  1  2  0  0  0  4  2  1  6   4.0359     546
  2  1  1  2  0  0  1  3  2  1  6   4.0359     546
  3  1  1  2  0  0  0  2  2  1  6   4.0359     546
  4  1  1  6  0  0  0  1  2  1  2   4.0359     546
  1  2  1  2  0  0  0  4  1  1  6   4.0359     547
  2  2  1  6  0  0  0  3  1  1  2   4.0359     547
  3  2  1  6  0  0 -1  2  1  1  2   4.0359     547
  4  2  1  6  0  0  0  1  1  1  2   4.0359     547
  1  2  1  2  0  0  0  4  2  1  6   4.0359     548
  4  2  1  6  0  0  0  1  2  1  2   4.0359     548
  2  1  1  6  0  0  0  3  1  1  2   4.0359     545
  3  1  1  2  0  0  0  2  1  1  6   4.0359     545
  2  2  1  2  0  0  1  3  2  1  6   4.0359     548
  3  2  1  6  0  0 -1  2  2  1  2   4.0359     548
  2  1  1  2  0  0  1  3  1  1  6   4.0359     545
  3  1  1  6  0  0 -1  2  1  1  2   4.0359     545
  2  1  1  6  0  0  0  3  2  1  2   4.0359     546
  3  1  1  6  0  0 -1  2  2  1  2   4.0359     546
  2  2  1  2  0  0  1  3  1  1  6   4.0359     547
  3  2  1  2  0  0  0  2  1  1  6   4.0359     547
  2  2  1  6  0  0  0  3  2  1  2   4.0359     548
  3  2  1  2  0  0  0  2  2  1  6   4.0359     548
  1  1  1  6  0  0  1  4  1  1  2   4.0359     545
  4  1  1  2  0  0 -1  1  1  1  6   4.0359     545
  1  1  1  6  0  0  1  4  2  1  2   4.0359     546
  4  1  1  2  0  0 -1  1  2  1  6   4.0359     546
  1  2  1  6  0  0  1  4  1  1  2   4.0359     547
  4  2  1  2  0  0 -1  1  1  1  6   4.0359     547
  1  2  1  6  0  0  1  4  2  1  2   4.0359     548
  4  2  1  2  0  0 -1  1  2  1  6   4.0359     548
  4  1  1 14  1  0  0  3  2  1 28   4.0364     546
  3  2  1 28 -1  0  0  4  1  1 14   4.0364     547
  1  2  1 28  1  0  0  2  2  1 14   4.0364     548
  2  2  1 14 -1  0  0  1  2  1 28   4.0364     548
  3  2  1 28 -1  0  0  4  2  1 14   4.0364     548
  4  2  1 14  1  0  0  3  2  1 28   4.0364     548
  1  1  1 14  1 -1  0  2  2  1 28   4.0364     546
  2  1  1 14 -1  0  0  1  2  1 28   4.0364     546
  3  1  1 14 -1  1  0  4  2  1 28   4.0364     546
  1  2  1 28  1  0  0  2  1  1 14   4.0364     547
  2  2  1 28 -1  1  0  1  1  1 14   4.0364     547
  4  2  1 28  1 -1  0  3  1  1 14   4.0364     547
  1  2  1 14  1 -1  0  2  2  1 28   4.0364     548
  2  2  1 28 -1  1  0  1  2  1 14   4.0364     548
  3  2  1 14 -1  1  0  4  2  1 28   4.0364     548
  4  2  1 28  1 -1  0  3  2  1 14   4.0364     548
  1  1  1 28  0  0  1  4  1  1 16   4.0368     545
  4  1  1 16  0  0 -1  1  1  1 28   4.0368     545
  2  1  1 28  0  0  0  3  2  1 16   4.0368     546
  3  2  1 16  0  0  0  2  1  1 28   4.0368     547
  2  1  1 28  0  0  0  3  1  1 16   4.0368     545
  3  1  1 16  0  0  0  2  1  1 28   4.0368     545
  1  1  1 16  0  0  0  4  1  1 28   4.0368     545
  4  1  1 28  0  0  0  1  1  1 16   4.0368     545
  1  1  1 28  0  0  1  4  2  1 16   4.0368     546
  4  1  1 28  0  0  0  1  2  1 16   4.0368     546
  1  2  1 16  0  0  0  4  1  1 28   4.0368     547
  4  2  1 16  0  0 -1  1  1  1 28   4.0368     547
  2  1  1 16  0  0  1  3  1  1 28   4.0368     545
  3  1  1 28  0  0 -1  2  1  1 16   4.0368     545
  3  1  1 28  0  0 -1  2  2  1 16   4.0368     546
  2  2  1 16  0  0  1  3  1  1 28   4.0368     547
  2  1  1  6  0  0  0  3  1  1 21   4.0390     549
  3  1  1 21  0  0  0  2  1  1  6   4.0390     549
  2  1  1 21  0  0  1  3  2  1  6   4.0390     550
  3  1  1 21  0  0  0  2  2  1  6   4.0390     550
  2  2  1  6  0  0  0  3  1  1 21   4.0390     551
  3  2  1  6  0  0 -1  2  1  1 21   4.0390     551
  1  1  1 21  0  0  0  4  1  1  6   4.0390     549
  2  1  1 21  0  0  1  3  1  1  6   4.0390     549
  3  1  1  6  0  0 -1  2  1  1 21   4.0390     549
  4  1  1  6  0  0  0  1  1  1 21   4.0390     549
  1  1  1 21  0  0  0  4  2  1  6   4.0390     550
  4  2  1  6  0  0  0  1  1  1 21   4.0390     551
  1  1  1  6  0  0  1  4  1  1 21   4.0390     549
  4  1  1 21  0  0 -1  1  1  1  6   4.0390     549
  4  1  1 21  0  0 -1  1  2  1  6   4.0390     550
  1  2  1  6  0  0  1  4  1  1 21   4.0390     551
  1  1  1 20  1 -1  0  2  2  1 21   4.0397     550
  2  2  1 21 -1  1  0  1  1  1 20   4.0397     551
  2  1  1 20 -1  0  0  1  2  1 21   4.0397     550
  3  1  1 20 -1  1  0  4  2  1 21   4.0397     550
  4  1  1 20  1  0  0  3  2  1 21   4.0397     550
  1  2  1 21  1  0  0  2  1  1 20   4.0397     551
  3  2  1 21 -1  0  0  4  1  1 20   4.0397     551
  4  2  1 21  1 -1  0  3  1  1 20   4.0397     551
  3  1  1 13  0  0  0  4  2  1 20   4.0410     550
  4  2  1 20  0  0  0  3  1  1 13   4.0410     551
  3  2  1 13  0  0  0  4  2  1 20   4.0411     552
  3  2  1 20  0  1  0  4  2  1 13   4.0411     552
  4  2  1 13  0 -1  0  3  2  1 20   4.0411     552
  4  2  1 20  0  0  0  3  2  1 13   4.0411     552
  1  1  1 13  0  0  0  2  2  1 20   4.0411     550
  2  1  1 13  0  1  0  1  2  1 20   4.0411     550
  4  1  1 13  0 -1  0  3  2  1 20   4.0411     550
  1  2  1 20  0 -1  0  2  1  1 13   4.0411     551
  2  2  1 20  0  0  0  1  1  1 13   4.0411     551
  3  2  1 20  0  1  0  4  1  1 13   4.0411     551
  1  2  1 13  0  0  0  2  2  1 20   4.0411     552
  1  2  1 20  0 -1  0  2  2  1 13   4.0411     552
  2  2  1 13  0  1  0  1  2  1 20   4.0411     552
  2  2  1 20  0  0  0  1  2  1 13   4.0411     552
  3  1  1  2  0  0  0  2  2  1 25   4.0448     554
  2  2  1 25  0  0  0  3  1  1  2   4.0448     555
  2  1  1 25  0  0  0  3  1  1  2   4.0448     553
  3  1  1  2  0  0  0  2  1  1 25   4.0448     553
  1  1  1  2  0  0  0  4  2  1 25   4.0448     554
  4  1  1 25  0  0  0  1  2  1  2   4.0448     554
  1  2  1  2  0  0  0  4  1  1 25   4.0448     555
  4  2  1 25  0  0  0  1  1  1  2   4.0448     555
  1  2  1  2  0  0  0  4  2  1 25   4.0448     556
  4  2  1 25  0  0  0  1  2  1  2   4.0448     556
  1  1  1  2  0  0  0  4  1  1 25   4.0448     553
  2  1  1  2  0  0  1  3  1  1 25   4.0448     553
  3  1  1 25  0  0 -1  2  1  1  2   4.0448     553
  4  1  1 25  0  0  0  1  1  1  2   4.0448     553
  2  1  1  2  0  0  1  3  2  1 25   4.0448     554
  2  1  1 25  0  0  0  3  2  1  2   4.0448     554
  3  2  1  2  0  0  0  2  1  1 25   4.0448     555
  3  2  1 25  0  0 -1  2  1  1  2   4.0448     555
  2  2  1  2  0  0  1  3  2  1 25   4.0448     556
  2  2  1 25  0  0  0  3  2  1  2   4.0448     556
  3  2  1  2  0  0  0  2  2  1 25   4.0448     556
  3  2  1 25  0  0 -1  2  2  1  2   4.0448     556
  1  1  1 25  0  0  1  4  1  1  2   4.0448     553
  4  1  1  2  0  0 -1  1  1  1 25   4.0448     553
  1  1  1 25  0  0  1  4  2  1  2   4.0448     554
  3  1  1 25  0  0 -1  2  2  1  2   4.0448     554
  4  1  1  2  0  0 -1  1  2  1 25   4.0448     554
  1  2  1 25  0  0  1  4  1  1  2   4.0448     555
  2  2  1  2  0  0  1  3  1  1 25   4.0448     555
  4  2  1  2  0  0 -1  1  1  1 25   4.0448     555
  1  2  1 25  0  0  1  4  2  1  2   4.0448     556
  4  2  1  2  0  0 -1  1  2  1 25   4.0448     556
  4  1  1  6  0  0  0  1  2  1 21   4.0528     558
  1  2  1 21  0  0  0  4  1  1  6   4.0528     559
  1  2  1 21  0  0  0  4  2  1  6   4.0528     560
  2  2  1 21  0  0  1  3  2  1  6   4.0528     560
  3  2  1  6  0  0 -1  2  2  1 21   4.0528     560
  4  2  1  6  0  0  0  1  2  1 21   4.0528     560
  1  1  1  6  0  0  1  4  2  1 21   4.0528     558
  3  1  1  6  0  0 -1  2  2  1 21   4.0528     558
  2  2  1 21  0  0  1  3  1  1  6   4.0528     559
  4  2  1 21  0  0 -1  1  1  1  6   4.0528     559
  1  2  1  6  0  0  1  4  2  1 21   4.0528     560
  4  2  1 21  0  0 -1  1  2  1  6   4.0528     560
  2  1  1  6  0  0  0  3  2  1 21   4.0528     558
  3  2  1 21  0  0  0  2  1  1  6   4.0528     559
  2  2  1  6  0  0  0  3  2  1 21   4.0528     560
  3  2  1 21  0  0  0  2  2  1  6   4.0528     560
  2  1  1  5 -2  1  0  4  1  1 21   4.0529     557
  4  1  1 21  2 -1  0  2  1  1  5   4.0529     557
  4  1  1 21  2 -1  0  2  2  1  5   4.0529     558
  2  2  1  5 -2  1  0  4  1  1 21   4.0529     559
  2  1  1 21 -2  1  0  4  1  1  5   4.0529     557
  4  1  1  5  2 -1  0  2  1  1 21   4.0529     557
  1  1  1  5  2  0  1  3  1  1 21   4.0529     557
  1  1  1 21  2  0  1  3  1  1  5   4.0529     557
  3  1  1  5 -2  0 -1  1  1  1 21   4.0529     557
  3  1  1 21 -2  0 -1  1  1  1  5   4.0529     557
  1  1  1 21  2  0  1  3  2  1  5   4.0529     558
  2  1  1 21 -2  1  0  4  2  1  5   4.0529     558
  3  1  1 21 -2  0 -1  1  2  1  5   4.0529     558
  1  2  1  5  2  0  1  3  1  1 21   4.0529     559
  3  2  1  5 -2  0 -1  1  1  1 21   4.0529     559
  4  2  1  5  2 -1  0  2  1  1 21   4.0529     559
  2  1  1 18 -1  1  0  4  1  1 23   4.0542     557
  4  1  1 23  1 -1  0  2  1  1 18   4.0542     557
  4  1  1 23  1 -1  0  2  2  1 18   4.0542     558
  2  2  1 18 -1  1  0  4  1  1 23   4.0542     559
  2  2  1 18 -1  1  0  4  2  1 23   4.0542     560
  4  2  1 23  1 -1  0  2  2  1 18   4.0542     560
  2  1  1 18 -1  1  0  4  2  1 23   4.0542     558
  4  2  1 23  1 -1  0  2  1  1 18   4.0542     559
  1  1  1 18  1  0  1  3  2  1 23   4.0542     558
  3  2  1 23 -1  0 -1  1  1  1 18   4.0542     559
  1  2  1 18  1  0  1  3  2  1 23   4.0542     560
  3  2  1 23 -1  0 -1  1  2  1 18   4.0542     560
  1  1  1 23  1  0  1  3  2  1 18   4.0542     558
  3  2  1 18 -1  0 -1  1  1  1 23   4.0542     559
  1  2  1 23  1  0  1  3  2  1 18   4.0542     560
  2  2  1 23 -1  1  0  4  2  1 18   4.0542     560
  3  2  1 18 -1  0 -1  1  2  1 23   4.0542     560
  4  2  1 18  1 -1  0  2  2  1 23   4.0542     560
  1  1  1 18  1  0  1  3  1  1 23   4.0542     557
  1  1  1 23  1  0  1  3  1  1 18   4.0542     557
  3  1  1 18 -1  0 -1  1  1  1 23   4.0542     557
  3  1  1 23 -1  0 -1  1  1  1 18   4.0542     557
  2  1  1 23 -1  1  0  4  2  1 18   4.0542     558
  3  1  1 18 -1  0 -1  1  2  1 23   4.0542     558
  3  1  1 23 -1  0 -1  1  2  1 18   4.0542     558
  4  1  1 18  1 -1  0  2  2  1 23   4.0542     558
  1  2  1 18  1  0  1  3  1  1 23   4.0542     559
  1  2  1 23  1  0  1  3  1  1 18   4.0542     559
  2  2  1 23 -1  1  0  4  1  1 18   4.0542     559
  4  2  1 18  1 -1  0  2  1  1 23   4.0542     559
  2  1  1 23 -1  1  0  4  1  1 18   4.0542     557
  4  1  1 18  1 -1  0  2  1  1 23   4.0542     557
  1  1  1 26 -1  0  0  4  1  1 23   4.0569     557
  4  1  1 23  1  0  0  1  1  1 26   4.0569     557
  1  1  1 26 -1  0  0  4  2  1 23   4.0569     558
  4  2  1 23  1  0  0  1  1  1 26   4.0569     559
  1  1  1 23  1  0  1  4  1  1 26   4.0569     557
  4  1  1 26 -1  0 -1  1  1  1 23   4.0569     557
  3  1  1 26  1  0  0  2  2  1 23   4.0569     558
  4  1  1 26 -1  0 -1  1  2  1 23   4.0569     558
  1  2  1 23  1  0  1  4  1  1 26   4.0569     559
  2  2  1 23 -1  0  0  3  1  1 26   4.0569     559
  2  1  1 23 -1  0  0  3  1  1 26   4.0569     557
  3  1  1 26  1  0  0  2  1  1 23   4.0569     557
  2  1  1 26  1  0  1  3  2  1 23   4.0569     558
  3  2  1 23 -1  0 -1  2  1  1 26   4.0569     559
  2  1  1 26  1  0  1  3  1  1 23   4.0569     557
  3  1  1 23 -1  0 -1  2  1  1 26   4.0569     557
  2  1  1 15 -1  1  0  4  1  1 23   4.0661     561
  4  1  1 23  1 -1  0  2  1  1 15   4.0661     561
  4  1  1 23  1 -1  0  2  2  1 15   4.0661     562
  2  2  1 15 -1  1  0  4  1  1 23   4.0661     563
  2  2  1 15 -1  1  0  4  2  1 23   4.0661     564
  4  2  1 23  1 -1  0  2  2  1 15   4.0661     564
  1  1  1 15  1  0  1  3  2  1 23   4.0661     562
  2  1  1 15 -1  1  0  4  2  1 23   4.0661     562
  3  2  1 23 -1  0 -1  1  1  1 15   4.0661     563
  4  2  1 23  1 -1  0  2  1  1 15   4.0661     563
  1  2  1 15  1  0  1  3  2  1 23   4.0661     564
  2  2  1 23 -1  1  0  4  2  1 15   4.0661     564
  3  2  1 23 -1  0 -1  1  2  1 15   4.0661     564
  4  2  1 15  1 -1  0  2  2  1 23   4.0661     564
  1  1  1 15  1  0  1  3  1  1 23   4.0661     561
  3  1  1 23 -1  0 -1  1  1  1 15   4.0661     561
  1  1  1 23  1  0  1  3  2  1 15   4.0661     562
  3  1  1 15 -1  0 -1  1  2  1 23   4.0661     562
  3  1  1 23 -1  0 -1  1  2  1 15   4.0661     562
  4  1  1 15  1 -1  0  2  2  1 23   4.0661     562
  1  2  1 15  1  0  1  3  1  1 23   4.0661     563
  1  2  1 23  1  0  1  3  1  1 15   4.0661     563
  2  2  1 23 -1  1  0  4  1  1 15   4.0661     563
  3  2  1 15 -1  0 -1  1  1  1 23   4.0661     563
  1  2  1 23  1  0  1  3  2  1 15   4.0661     564
  3  2  1 15 -1  0 -1  1  2  1 23   4.0661     564
  1  1  1 23  1  0  1  3  1  1 15   4.0661     561
  3  1  1 15 -1  0 -1  1  1  1 23   4.0661     561
  2  1  1 23 -1  1  0  4  2  1 15   4.0661     562
  4  2  1 15  1 -1  0  2  1  1 23   4.0661     563
  2  1  1 23 -1  1  0  4  1  1 15   4.0661     561
  4  1  1 15  1 -1  0  2  1  1 23   4.0661     561
  2  1  1 16 -1  1  0  4  1  1 23   4.0765     565
  4  1  1 23  1 -1  0  2  1  1 16   4.0765     565
  4  1  1 23  1 -1  0  2  2  1 16   4.0765     566
  2  2  1 16 -1  1  0  4  1  1 23   4.0765     567
  1  1  1 16  1  0  1  3  2  1 23   4.0765     566
  2  1  1 16 -1  1  0  4  2  1 23   4.0765     566
  3  2  1 23 -1  0 -1  1  1  1 16   4.0765     567
  4  2  1 23  1 -1  0  2  1  1 16   4.0765     567
  1  2  1 16  1  0  1  3  2  1 23   4.0765     568
  2  2  1 16 -1  1  0  4  2  1 23   4.0765     568
  2  2  1 23 -1  1  0  4  2  1 16   4.0765     568
  3  2  1 23 -1  0 -1  1  2  1 16   4.0765     568
  4  2  1 16  1 -1  0  2  2  1 23   4.0765     568
  4  2  1 23  1 -1  0  2  2  1 16   4.0765     568
  1  1  1 16  1  0  1  3  1  1 23   4.0765     565
  1  1  1 23  1  0  1  3  1  1 16   4.0765     565
  3  1  1 16 -1  0 -1  1  1  1 23   4.0765     565
  3  1  1 23 -1  0 -1  1  1  1 16   4.0765     565
  2  1  1 23 -1  1  0  4  2  1 16   4.0765     566
  3  1  1 16 -1  0 -1  1  2  1 23   4.0765     566
  3  1  1 23 -1  0 -1  1  2  1 16   4.0765     566
  4  1  1 16  1 -1  0  2  2  1 23   4.0765     566
  1  2  1 16  1  0  1  3  1  1 23   4.0765     567
  1  2  1 23  1  0  1  3  1  1 16   4.0765     567
  4  2  1 16  1 -1  0  2  1  1 23   4.0765     567
  1  1  1 23  1  0  1  3  2  1 16   4.0766     566
  2  2  1 23 -1  1  0  4  1  1 16   4.0766     567
  3  2  1 16 -1  0 -1  1  1  1 23   4.0766     567
  1  2  1 23  1  0  1  3  2  1 16   4.0766     568
  3  2  1 16 -1  0 -1  1  2  1 23   4.0766     568
  2  1  1 23 -1  1  0  4  1  1 16   4.0766     565
  4  1  1 16  1 -1  0  2  1  1 23   4.0766     565
  3  1  1 13  0  0  0  4  1  1 20   4.0812     565
  4  1  1 20  0  0  0  3  1  1 13   4.0812     565
  1  1  1 20  0 -1  0  2  2  1 13   4.0812     566
  3  1  1 20  0  1  0  4  2  1 13   4.0812     566
  4  1  1 20  0  0  0  3  2  1 13   4.0812     566
  2  2  1 13  0  1  0  1  1  1 20   4.0812     567
  3  2  1 13  0  0  0  4  1  1 20   4.0812     567
  4  2  1 13  0 -1  0  3  1  1 20   4.0812     567
  1  1  1 13  0  0  0  2  1  1 20   4.0812     565
  1  1  1 20  0 -1  0  2  1  1 13   4.0812     565
  2  1  1 13  0  1  0  1  1  1 20   4.0812     565
  2  1  1 20  0  0  0  1  1  1 13   4.0812     565
  3  1  1 20  0  1  0  4  1  1 13   4.0812     565
  4  1  1 13  0 -1  0  3  1  1 20   4.0812     565
  2  1  1 20  0  0  0  1  2  1 13   4.0812     566
  1  2  1 13  0  0  0  2  1  1 20   4.0812     567
  1  2  1 20  1 -1  0  2  2  1 21   4.0893     572
  2  2  1 21 -1  1  0  1  2  1 20   4.0893     572
  3  2  1 20 -1  1  0  4  2  1 21   4.0893     572
  4  2  1 21  1 -1  0  3  2  1 20   4.0893     572
  1  2  1 21  1  0  0  2  2  1 20   4.0893     572
  2  2  1 20 -1  0  0  1  2  1 21   4.0893     572
  3  2  1 21 -1  0  0  4  2  1 20   4.0893     572
  4  2  1 20  1  0  0  3  2  1 21   4.0893     572
  4  1  1  6  1 -1  0  2  2  1  2   4.0927     570
  2  2  1  2 -1  1  0  4  1  1  6   4.0927     571
  2  2  1  2 -1  1  0  4  2  1  6   4.0927     572
  4  2  1  6  1 -1  0  2  2  1  2   4.0927     572
  1  1  1  2  1  0  1  3  1  1  6   4.0927     569
  2  1  1  2 -1  1  0  4  1  1  6   4.0927     569
  3  1  1  6 -1  0 -1  1  1  1  2   4.0927     569
  4  1  1  6  1 -1  0  2  1  1  2   4.0927     569
  1  1  1  2  1  0  1  3  2  1  6   4.0927     570
  1  1  1  6  1  0  1  3  2  1  2   4.0927     570
  2  1  1  2 -1  1  0  4  2  1  6   4.0927     570
  2  1  1  6 -1  1  0  4  2  1  2   4.0927     570
  3  1  1  6 -1  0 -1  1  2  1  2   4.0927     570
  4  1  1  2  1 -1  0  2  2  1  6   4.0927     570
  1  2  1  2  1  0  1  3  1  1  6   4.0927     571
  2  2  1  6 -1  1  0  4  1  1  2   4.0927     571
  3  2  1  2 -1  0 -1  1  1  1  6   4.0927     571
  3  2  1  6 -1  0 -1  1  1  1  2   4.0927     571
  4  2  1  2  1 -1  0  2  1  1  6   4.0927     571
  4  2  1  6  1 -1  0  2  1  1  2   4.0927     571
  1  2  1  2  1  0  1  3  2  1  6   4.0927     572
  1  2  1  6  1  0  1  3  2  1  2   4.0927     572
  2  2  1  6 -1  1  0  4  2  1  2   4.0927     572
  3  2  1  2 -1  0 -1  1  2  1  6   4.0927     572
  3  2  1  6 -1  0 -1  1  2  1  2   4.0927     572
  4  2  1  2  1 -1  0  2  2  1  6   4.0927     572
  1  1  1  6  1  0  1  3  1  1  2   4.0927     569
  2  1  1  6 -1  1  0  4  1  1  2   4.0927     569
  3  1  1  2 -1  0 -1  1  1  1  6   4.0927     569
  4  1  1  2  1 -1  0  2  1  1  6   4.0927     569
  3  1  1  2 -1  0 -1  1  2  1  6   4.0927     570
  1  2  1  6  1  0  1  3  1  1  2   4.0927     571
  4  1  1  4  1 -1  0  2  2  1  2   4.0949     574
  2  2  1  2 -1  1  0  4  1  1  4   4.0949     575
  2  2  1  2 -1  1  0  4  2  1  4   4.0949     576
  4  2  1  4  1 -1  0  2  2  1  2   4.0949     576
  2  1  1  2 -1  1  0  4  1  1  4   4.0949     573
  4  1  1  4  1 -1  0  2  1  1  2   4.0949     573
  1  1  1  2  1  0  1  3  2  1  4   4.0949     574
  1  1  1  4  1  0  1  3  2  1  2   4.0949     574
  2  1  1  2 -1  1  0  4  2  1  4   4.0949     574
  4  1  1  2  1 -1  0  2  2  1  4   4.0949     574
  2  2  1  4 -1  1  0  4  1  1  2   4.0949     575
  3  2  1  2 -1  0 -1  1  1  1  4   4.0949     575
  3  2  1  4 -1  0 -1  1  1  1  2   4.0949     575
  4  2  1  4  1 -1  0  2  1  1  2   4.0949     575
  1  2  1  2  1  0  1  3  2  1  4   4.0949     576
  1  2  1  4  1  0  1  3  2  1  2   4.0949     576
  2  2  1  4 -1  1  0  4  2  1  2   4.0949     576
  3  2  1  2 -1  0 -1  1  2  1  4   4.0949     576
  3  2  1  4 -1  0 -1  1  2  1  2   4.0949     576
  4  2  1  2  1 -1  0  2  2  1  4   4.0949     576
  1  1  1  2  1  0  1  3  1  1  4   4.0950     573
  1  1  1  4  1  0  1  3  1  1  2   4.0950     573
  2  1  1  4 -1  1  0  4  1  1  2   4.0950     573
  3  1  1  2 -1  0 -1  1  1  1  4   4.0950     573
  3  1  1  4 -1  0 -1  1  1  1  2   4.0950     573
  4  1  1  2  1 -1  0  2  1  1  4   4.0950     573
  2  1  1  4 -1  1  0  4  2  1  2   4.0950     574
  3  1  1  2 -1  0 -1  1  2  1  4   4.0950     574
  3  1  1  4 -1  0 -1  1  2  1  2   4.0950     574
  1  2  1  2  1  0  1  3  1  1  4   4.0950     575
  1  2  1  4  1  0  1  3  1  1  2   4.0950     575
  4  2  1  2  1 -1  0  2  1  1  4   4.0950     575
  2  1  1 23 -1  0  0  2  1  1 27   4.0967     573
  2  1  1 27  1  0  0  2  1  1 23   4.0967     573
  1  1  1 23  1  0  0  1  1  1 27   4.0967     573
  1  1  1 27 -1  0  0  1  1  1 23   4.0967     573
  3  1  1 23 -1  0  0  3  1  1 27   4.0967     573
  3  1  1 27  1  0  0  3  1  1 23   4.0967     573
  1  1  1 27 -1  0  0  1  2  1 23   4.0967     574
  2  1  1 27  1  0  0  2  2  1 23   4.0967     574
  1  2  1 23  1  0  0  1  1  1 27   4.0967     575
  2  2  1 23 -1  0  0  2  1  1 27   4.0967     575
  3  1  1 27  1  0  0  3  2  1 23   4.0968     574
  3  2  1 23 -1  0  0  3  1  1 27   4.0968     575
  4  1  1 27 -1  0  0  4  2  1 23   4.0968     574
  4  2  1 23  1  0  0  4  1  1 27   4.0968     575
  4  1  1 23  1  0  0  4  1  1 27   4.0968     573
  4  1  1 27 -1  0  0  4  1  1 23   4.0968     573
  4  1  1 17  1  0  0  3  2  1 26   4.0996     574
  3  2  1 26 -1  0  0  4  1  1 17   4.0996     575
  1  2  1 26  1  0  0  2  2  1 17   4.0996     576
  2  2  1 17 -1  0  0  1  2  1 26   4.0996     576
  1  1  1 17  1 -1  0  2  2  1 26   4.0996     574
  2  1  1 17 -1  0  0  1  2  1 26   4.0996     574
  3  1  1 17 -1  1  0  4  2  1 26   4.0996     574
  1  2  1 26  1  0  0  2  1  1 17   4.0996     575
  2  2  1 26 -1  1  0  1  1  1 17   4.0996     575
  4  2  1 26  1 -1  0  3  1  1 17   4.0996     575
  1  2  1 17  1 -1  0  2  2  1 26   4.0996     576
  2  2  1 26 -1  1  0  1  2  1 17   4.0996     576
  3  2  1 17 -1  1  0  4  2  1 26   4.0996     576
  3  2  1 26 -1  0  0  4  2  1 17   4.0996     576
  4  2  1 17  1  0  0  3  2  1 26   4.0996     576
  4  2  1 26  1 -1  0  3  2  1 17   4.0996     576
  1  1  1  5  2  0  1  3  2  1 21   4.1006     578
  3  2  1 21 -2  0 -1  1  1  1  5   4.1006     579
  1  2  1  5  2  0  1  3  2  1 21   4.1006     580
  2  2  1  5 -2  1  0  4  2  1 21   4.1006     580
  3  2  1 21 -2  0 -1  1  2  1  5   4.1006     580
  4  2  1 21  2 -1  0  2  2  1  5   4.1006     580
  2  1  1  5 -2  1  0  4  2  1 21   4.1006     578
  3  1  1  5 -2  0 -1  1  2  1 21   4.1006     578
  4  1  1  5  2 -1  0  2  2  1 21   4.1006     578
  1  2  1 21  2  0  1  3  1  1  5   4.1006     579
  2  2  1 21 -2  1  0  4  1  1  5   4.1006     579
  4  2  1 21  2 -1  0  2  1  1  5   4.1006     579
  1  2  1 21  2  0  1  3  2  1  5   4.1006     580
  3  2  1  5 -2  0 -1  1  2  1 21   4.1006     580
  2  2  1 21 -2  1  0  4  2  1  5   4.1006     580
  4  2  1  5  2 -1  0  2  2  1 21   4.1006     580
  1  1  1 25  0  0  1  4  1  1 17   4.1067     581
  4  1  1 17  0  0 -1  1  1  1 25   4.1067     581
  1  1  1 17  0  0  0  4  2  1 25   4.1067     582
  4  1  1 17  0  0 -1  1  2  1 25   4.1067     582
  1  2  1 25  0  0  1  4  1  1 17   4.1067     583
  4  2  1 25  0  0  0  1  1  1 17   4.1067     583
  1  2  1 17  0  0  0  4  2  1 25   4.1067     584
  4  2  1 25  0  0  0  1  2  1 17   4.1067     584
  1  1  1 17  0  0  0  4  1  1 25   4.1067     581
  4  1  1 25  0  0  0  1  1  1 17   4.1067     581
  2  1  1 25  0  0  0  3  2  1 17   4.1067     582
  4  1  1 25  0  0  0  1  2  1 17   4.1067     582
  1  2  1 17  0  0  0  4  1  1 25   4.1067     583
  3  2  1 17  0  0  0  2  1  1 25   4.1067     583
  2  2  1 25  0  0  0  3  2  1 17   4.1067     584
  3  2  1 17  0  0  0  2  2  1 25   4.1067     584
  2  1  1 17  0  0  1  3  1  1 25   4.1067     581
  2  1  1 25  0  0  0  3  1  1 17   4.1067     581
  3  1  1 17  0  0  0  2  1  1 25   4.1067     581
  3  1  1 25  0  0 -1  2  1  1 17   4.1067     581
  1  1  1 25  0  0  1  4  2  1 17   4.1067     582
  2  1  1 17  0  0  1  3  2  1 25   4.1067     582
  3  1  1 17  0  0  0  2  2  1 25   4.1067     582
  2  2  1 25  0  0  0  3  1  1 17   4.1067     583
  3  2  1 25  0  0 -1  2  1  1 17   4.1067     583
  4  2  1 17  0  0 -1  1  1  1 25   4.1067     583
  1  2  1 25  0  0  1  4  2  1 17   4.1067     584
  2  2  1 17  0  0  1  3  2  1 25   4.1067     584
  3  2  1 25  0  0 -1  2  2  1 17   4.1067     584
  4  2  1 17  0  0 -1  1  2  1 25   4.1067     584
  3  1  1 25  0  0 -1  2  2  1 17   4.1067     582
  2  2  1 17  0  0  1  3  1  1 25   4.1067     583
  3  1  1  5 -1  1  0  4  1  1 13   4.1072     581
  4  1  1 13  1 -1  0  3  1  1  5   4.1072     581
  3  1  1  5 -1  1  0  4  2  1 13   4.1072     582
  4  2  1 13  1 -1  0  3  1  1  5   4.1072     583
  1  1  1  5  1 -1  0  2  1  1 13   4.1073     581
  1  1  1 13  1  0  0  2  1  1  5   4.1073     581
  2  1  1  5 -1  0  0  1  1  1 13   4.1073     581
  2  1  1 13 -1  1  0  1  1  1  5   4.1073     581
  2  1  1  5 -1  0  0  1  2  1 13   4.1073     582
  2  1  1 13 -1  1  0  1  2  1  5   4.1073     582
  1  2  1  5  1 -1  0  2  1  1 13   4.1073     583
  1  2  1 13  1  0  0  2  1  1  5   4.1073     583
  3  1  1 13 -1  0  0  4  1  1  5   4.1073     581
  4  1  1  5  1  0  0  3  1  1 13   4.1073     581
  1  1  1  5  1 -1  0  2  2  1 13   4.1073     582
  1  1  1 13  1  0  0  2  2  1  5   4.1073     582
  3  1  1 13 -1  0  0  4  2  1  5   4.1073     582
  4  1  1 13  1 -1  0  3  2  1  5   4.1073     582
  2  2  1  5 -1  0  0  1  1  1 13   4.1073     583
  2  2  1 13 -1  1  0  1  1  1  5   4.1073     583
  3  2  1  5 -1  1  0  4  1  1 13   4.1073     583
  4  2  1  5  1  0  0  3  1  1 13   4.1073     583
  1  2  1  5  1 -1  0  2  2  1 13   4.1073     584
  1  2  1 13  1  0  0  2  2  1  5   4.1073     584
  2  2  1  5 -1  0  0  1  2  1 13   4.1073     584
  2  2  1 13 -1  1  0  1  2  1  5   4.1073     584
  3  2  1  5 -1  1  0  4  2  1 13   4.1073     584
  3  2  1 13 -1  0  0  4  2  1  5   4.1073     584
  4  2  1  5  1  0  0  3  2  1 13   4.1073     584
  4  2  1 13  1 -1  0  3  2  1  5   4.1073     584
  4  1  1  5  1  0  0  3  2  1 13   4.1073     582
  3  2  1 13 -1  0  0  4  1  1  5   4.1073     583
  1  1  1  2  1  0  1  3  1  1 25   4.1158     585
  2  1  1 25 -1  1  0  4  1  1  2   4.1158     585
  3  1  1 25 -1  0 -1  1  1  1  2   4.1158     585
  4  1  1  2  1 -1  0  2  1  1 25   4.1158     585
  1  1  1 25  1  0  1  3  2  1  2   4.1158     586
  2  1  1  2 -1  1  0  4  2  1 25   4.1158     586
  2  1  1 25 -1  1  0  4  2  1  2   4.1158     586
  3  1  1 25 -1  0 -1  1  2  1  2   4.1158     586
  4  1  1  2  1 -1  0  2  2  1 25   4.1158     586
  4  1  1 25  1 -1  0  2  2  1  2   4.1158     586
  1  2  1  2  1  0  1  3  1  1 25   4.1158     587
  2  2  1 25 -1  1  0  4  1  1  2   4.1158     587
  3  2  1  2 -1  0 -1  1  1  1 25   4.1158     587
  4  2  1  2  1 -1  0  2  1  1 25   4.1158     587
  4  2  1 25  1 -1  0  2  1  1  2   4.1158     587
  1  2  1 25  1  0  1  3  2  1  2   4.1158     588
  2  2  1  2 -1  1  0  4  2  1 25   4.1158     588
  2  2  1 25 -1  1  0  4  2  1  2   4.1158     588
  3  2  1  2 -1  0 -1  1  2  1 25   4.1158     588
  4  2  1  2  1 -1  0  2  2  1 25   4.1158     588
  4  2  1 25  1 -1  0  2  2  1  2   4.1158     588
  1  1  1 25  1  0  1  3  1  1  2   4.1158     585
  2  1  1  2 -1  1  0  4  1  1 25   4.1158     585
  3  1  1  2 -1  0 -1  1  1  1 25   4.1158     585
  4  1  1 25  1 -1  0  2  1  1  2   4.1158     585
  1  1  1  2  1  0  1  3  2  1 25   4.1158     586
  3  1  1  2 -1  0 -1  1  2  1 25   4.1158     586
  1  2  1 25  1  0  1  3  1  1  2   4.1158     587
  2  2  1  2 -1  1  0  4  1  1 25   4.1158     587
  3  2  1 25 -1  0 -1  1  1  1  2   4.1158     587
  1  2  1  2  1  0  1  3  2  1 25   4.1158     588
  3  2  1 25 -1  0 -1  1  2  1  2   4.1158     588
  2  1  1  5 -1  0  0  3  1  1 11   4.1167     585
  3  1  1 11  1  0  0  2  1  1  5   4.1167     585
  2  1  1  5 -1  0  0  3  2  1 11   4.1167     586
  3  1  1 11  1  0  0  2  2  1  5   4.1167     586
  2  2  1  5 -1  0  0  3  1  1 11   4.1167     587
  3  2  1 11  1  0  0  2  1  1  5   4.1167     587
  2  2  1  5 -1  0  0  3  2  1 11   4.1167     588
  3  2  1 11  1  0  0  2  2  1  5   4.1167     588
  1  1  1  5  1  0  1  4  1  1 11   4.1167     585
  1  1  1 11 -1  0  0  4  1  1  5   4.1167     585
  4  1  1  5  1  0  0  1  1  1 11   4.1167     585
  4  1  1 11 -1  0 -1  1  1  1  5   4.1167     585
  1  1  1  5  1  0  1  4  2  1 11   4.1167     586
  1  1  1 11 -1  0  0  4  2  1  5   4.1167     586
  2  1  1 11  1  0  1  3  2  1  5   4.1167     586
  4  1  1  5  1  0  0  1  2  1 11   4.1167     586
  4  1  1 11 -1  0 -1  1  2  1  5   4.1167     586
  1  2  1  5  1  0  1  4  1  1 11   4.1167     587
  1  2  1 11 -1  0  0  4  1  1  5   4.1167     587
  3  2  1  5 -1  0 -1  2  1  1 11   4.1167     587
  4  2  1  5  1  0  0  1  1  1 11   4.1167     587
  4  2  1 11 -1  0 -1  1  1  1  5   4.1167     587
  1  2  1  5  1  0  1  4  2  1 11   4.1167     588
  1  2  1 11 -1  0  0  4  2  1  5   4.1167     588
  2  2  1 11  1  0  1  3  2  1  5   4.1167     588
  3  2  1  5 -1  0 -1  2  2  1 11   4.1167     588
  4  2  1  5  1  0  0  1  2  1 11   4.1167     588
  4  2  1 11 -1  0 -1  1  2  1  5   4.1167     588
  2  1  1 11  1  0  1  3  1  1  5   4.1167     585
  3  1  1  5 -1  0 -1  2  1  1 11   4.1167     585
  3  1  1  5 -1  0 -1  2  2  1 11   4.1167     586
  2  2  1 11  1  0  1  3  1  1  5   4.1167     587
  3  1  1  7 -1  1  0  4  1  1 14   4.1233     589
  4  1  1 14  1 -1  0  3  1  1  7   4.1233     589
  1  1  1  7  1 -1  0  2  1  1 14   4.1233     589
  1  1  1 14  1  0  0  2  1  1  7   4.1233     589
  2  1  1  7 -1  0  0  1  1  1 14   4.1233     589
  2  1  1 14 -1  1  0  1  1  1  7   4.1233     589
  3  1  1 14 -1  0  0  4  1  1  7   4.1233     589
  4  1  1  7  1  0  0  3  1  1 14   4.1233     589
  1  1  1  7  1 -1  0  2  2  1 14   4.1233     590
  2  1  1  7 -1  0  0  1  2  1 14   4.1233     590
  2  1  1 14 -1  1  0  1  2  1  7   4.1233     590
  3  1  1  7 -1  1  0  4  2  1 14   4.1233     590
  3  1  1 14 -1  0  0  4  2  1  7   4.1233     590
  4  1  1 14  1 -1  0  3  2  1  7   4.1233     590
  1  2  1  7  1 -1  0  2  1  1 14   4.1233     591
  1  2  1 14  1  0  0  2  1  1  7   4.1233     591
  2  2  1 14 -1  1  0  1  1  1  7   4.1233     591
  3  2  1  7 -1  1  0  4  1  1 14   4.1233     591
  4  2  1  7  1  0  0  3  1  1 14   4.1233     591
  4  2  1 14  1 -1  0  3  1  1  7   4.1233     591
  1  2  1  7  1 -1  0  2  2  1 14   4.1233     592
  2  2  1 14 -1  1  0  1  2  1  7   4.1233     592
  3  2  1  7 -1  1  0  4  2  1 14   4.1233     592
  4  2  1 14  1 -1  0  3  2  1  7   4.1233     592
  1  1  1 14  1  0  0  2  2  1  7   4.1233     590
  4  1  1  7  1  0  0  3  2  1 14   4.1233     590
  2  2  1  7 -1  0  0  1  1  1 14   4.1233     591
  3  2  1 14 -1  0  0  4  1  1  7   4.1233     591
  1  2  1 14  1  0  0  2  2  1  7   4.1233     592
  2  2  1  7 -1  0  0  1  2  1 14   4.1233     592
  3  2  1 14 -1  0  0  4  2  1  7   4.1233     592
  4  2  1  7  1  0  0  3  2  1 14   4.1233     592
  2  1  1  8 -1  1  0  4  1  1  4   4.1254     589
  4  1  1  4  1 -1  0  2  1  1  8   4.1254     589
  1  1  1  8  1  0  1  3  2  1  4   4.1254     590
  2  1  1  8 -1  1  0  4  2  1  4   4.1254     590
  4  1  1  4  1 -1  0  2  2  1  8   4.1254     590
  4  1  1  8  1 -1  0  2  2  1  4   4.1254     590
  2  2  1  4 -1  1  0  4  1  1  8   4.1254     591
  2  2  1  8 -1  1  0  4  1  1  4   4.1254     591
  3  2  1  4 -1  0 -1  1  1  1  8   4.1254     591
  4  2  1  4  1 -1  0  2  1  1  8   4.1254     591
  1  2  1  8  1  0  1  3  2  1  4   4.1254     592
  2  2  1  4 -1  1  0  4  2  1  8   4.1254     592
  2  2  1  8 -1  1  0  4  2  1  4   4.1254     592
  3  2  1  4 -1  0 -1  1  2  1  8   4.1254     592
  4  2  1  4  1 -1  0  2  2  1  8   4.1254     592
  4  2  1  8  1 -1  0  2  2  1  4   4.1254     592
  1  1  1  4  1  0  1  3  1  1  8   4.1254     589
  1  1  1  8  1  0  1  3  1  1  4   4.1254     589
  2  1  1  4 -1  1  0  4  1  1  8   4.1254     589
  3  1  1  4 -1  0 -1  1  1  1  8   4.1254     589
  3  1  1  8 -1  0 -1  1  1  1  4   4.1254     589
  4  1  1  8  1 -1  0  2  1  1  4   4.1254     589
  1  1  1  4  1  0  1  3  2  1  8   4.1254     590
  2  1  1  4 -1  1  0  4  2  1  8   4.1254     590
  3  1  1  4 -1  0 -1  1  2  1  8   4.1254     590
  3  1  1  8 -1  0 -1  1  2  1  4   4.1254     590
  1  2  1  4  1  0  1  3  1  1  8   4.1254     591
  1  2  1  8  1  0  1  3  1  1  4   4.1254     591
  3  2  1  8 -1  0 -1  1  1  1  4   4.1254     591
  4  2  1  8  1 -1  0  2  1  1  4   4.1254     591
  1  2  1  4  1  0  1  3  2  1  8   4.1254     592
  3  2  1  8 -1  0 -1  1  2  1  4   4.1254     592
  3  1  1 12 -1  1  0  4  1  1 21   4.1272     589
  3  1  1 21 -1  0  0  4  1  1 12   4.1272     589
  4  1  1 12  1  0  0  3  1  1 21   4.1272     589
  4  1  1 21  1 -1  0  3  1  1 12   4.1272     589
  4  1  1 21  1 -1  0  3  2  1 12   4.1272     590
  3  2  1 12 -1  1  0  4  1  1 21   4.1272     591
  1  1  1 12  1 -1  0  2  1  1 21   4.1272     589
  1  1  1 21  1  0  0  2  1  1 12   4.1272     589
  2  1  1 12 -1  0  0  1  1  1 21   4.1272     589
  2  1  1 21 -1  1  0  1  1  1 12   4.1272     589
  1  1  1 21  1  0  0  2  2  1 12   4.1272     590
  2  1  1 21 -1  1  0  1  2  1 12   4.1272     590
  3  1  1 21 -1  0  0  4  2  1 12   4.1272     590
  1  2  1 12  1 -1  0  2  1  1 21   4.1272     591
  2  2  1 12 -1  0  0  1  1  1 21   4.1272     591
  4  2  1 12  1  0  0  3  1  1 21   4.1272     591
  2  1  1 27  0  0  0  3  1  1 14   4.1291     593
  3  1  1 14  0  0  0  2  1  1 27   4.1291     593
  1  1  1 14  0  0  0  4  1  1 27   4.1291     593
  1  1  1 27  0  0  1  4  1  1 14   4.1291     593
  2  1  1 14  0  0  1  3  1  1 27   4.1291     593
  3  1  1 27  0  0 -1  2  1  1 14   4.1291     593
  4  1  1 14  0  0 -1  1  1  1 27   4.1291     593
  4  1  1 27  0  0  0  1  1  1 14   4.1291     593
  1  1  1 27  0  0  1  4  2  1 14   4.1291     594
  2  1  1 27  0  0  0  3  2  1 14   4.1291     594
  3  1  1 27  0  0 -1  2  2  1 14   4.1291     594
  4  1  1 27  0  0  0  1  2  1 14   4.1291     594
  1  2  1 14  0  0  0  4  1  1 27   4.1291     595
  2  2  1 14  0  0  1  3  1  1 27   4.1291     595
  3  2  1 14  0  0  0  2  1  1 27   4.1291     595
  4  2  1 14  0  0 -1  1  1  1 27   4.1291     595
  1  1  1 27  1  0  1  3  2  1 28   4.1363     598
  2  1  1 27 -1  1  0  4  2  1 28   4.1363     598
  3  2  1 28 -1  0 -1  1  1  1 27   4.1363     599
  4  2  1 28  1 -1  0  2  1  1 27   4.1363     599
  3  1  1 27 -1  0 -1  1  2  1 28   4.1363     598
  1  2  1 28  1  0  1  3  1  1 27   4.1363     599
  4  1  1 27  1 -1  0  2  2  1 28   4.1363     598
  2  2  1 28 -1  1  0  4  1  1 27   4.1363     599
  1  1  1 19  1  0  0  2  1  1  4   4.1363     597
  2  1  1  4 -1  0  0  1  1  1 19   4.1363     597
  2  1  1  4 -1  0  0  1  2  1 19   4.1363     598
  3  1  1 19 -1  0  0  4  2  1  4   4.1363     598
  1  2  1 19  1  0  0  2  1  1  4   4.1363     599
  4  2  1  4  1  0  0  3  1  1 19   4.1363     599
  1  1  1  4  1 -1  0  2  1  1 19   4.1363     597
  2  1  1 19 -1  1  0  1  1  1  4   4.1363     597
  3  1  1  4 -1  1  0  4  1  1 19   4.1363     597
  3  1  1 19 -1  0  0  4  1  1  4   4.1363     597
  4  1  1  4  1  0  0  3  1  1 19   4.1363     597
  4  1  1 19  1 -1  0  3  1  1  4   4.1363     597
  1  1  1  4  1 -1  0  2  2  1 19   4.1363     598
  1  1  1 19  1  0  0  2  2  1  4   4.1363     598
  2  1  1 19 -1  1  0  1  2  1  4   4.1363     598
  3  1  1  4 -1  1  0  4  2  1 19   4.1363     598
  1  2  1  4  1 -1  0  2  1  1 19   4.1363     599
  2  2  1  4 -1  0  0  1  1  1 19   4.1363     599
  2  2  1 19 -1  1  0  1  1  1  4   4.1363     599
  4  2  1 19  1 -1  0  3  1  1  4   4.1363     599
  1  2  1  4  1 -1  0  2  2  1 19   4.1363     600
  1  2  1 19  1  0  0  2  2  1  4   4.1363     600
  2  2  1  4 -1  0  0  1  2  1 19   4.1363     600
  2  2  1 19 -1  1  0  1  2  1  4   4.1363     600
  3  2  1 19 -1  0  0  4  2  1  4   4.1363     600
  4  2  1  4  1  0  0  3  2  1 19   4.1363     600
  4  1  1  4  1  0  0  3  2  1 19   4.1364     598
  4  1  1 19  1 -1  0  3  2  1  4   4.1364     598
  3  2  1  4 -1  1  0  4  1  1 19   4.1364     599
  3  2  1 19 -1  0  0  4  1  1  4   4.1364     599
  3  2  1  4 -1  1  0  4  2  1 19   4.1364     600
  4  2  1 19  1 -1  0  3  2  1  4   4.1364     600
  3  1  1  6 -1  1  0  4  1  1 13   4.1378     597
  4  1  1 13  1 -1  0  3  1  1  6   4.1378     597
  1  1  1  6  1 -1  0  2  1  1 13   4.1378     597
  1  1  1 13  1  0  0  2  1  1  6   4.1378     597
  2  1  1  6 -1  0  0  1  1  1 13   4.1378     597
  2  1  1 13 -1  1  0  1  1  1  6   4.1378     597
  2  1  1  6 -1  0  0  1  2  1 13   4.1378     598
  2  1  1 13 -1  1  0  1  2  1  6   4.1378     598
  3  1  1  6 -1  1  0  4  2  1 13   4.1378     598
  4  1  1 13  1 -1  0  3  2  1  6   4.1378     598
  1  2  1  6  1 -1  0  2  1  1 13   4.1378     599
  1  2  1 13  1  0  0  2  1  1  6   4.1378     599
  3  2  1  6 -1  1  0  4  1  1 13   4.1378     599
  4  2  1 13  1 -1  0  3  1  1  6   4.1378     599
  3  1  1 13 -1  0  0  4  1  1  6   4.1378     597
  4  1  1  6  1  0  0  3  1  1 13   4.1378     597
  1  1  1  6  1 -1  0  2  2  1 13   4.1378     598
  1  1  1 13  1  0  0  2  2  1  6   4.1378     598
  3  1  1 13 -1  0  0  4  2  1  6   4.1378     598
  2  2  1  6 -1  0  0  1  1  1 13   4.1378     599
  2  2  1 13 -1  1  0  1  1  1  6   4.1378     599
  4  2  1  6  1  0  0  3  1  1 13   4.1378     599
  1  2  1  6  1 -1  0  2  2  1 13   4.1378     600
  1  2  1 13  1  0  0  2  2  1  6   4.1378     600
  2  2  1  6 -1  0  0  1  2  1 13   4.1378     600
  2  2  1 13 -1  1  0  1  2  1  6   4.1378     600
  3  2  1  6 -1  1  0  4  2  1 13   4.1378     600
  4  2  1 13  1 -1  0  3  2  1  6   4.1378     600
  4  1  1  6  1  0  0  3  2  1 13   4.1378     598
  3  2  1 13 -1  0  0  4  1  1  6   4.1378     599
  3  2  1 13 -1  0  0  4  2  1  6   4.1378     600
  4  2  1  6  1  0  0  3  2  1 13   4.1378     600
  1  1  1 17  0  0  0  3  1  1 18   4.1408     597
  1  1  1 18  0  0  0  3  1  1 17   4.1408     597
  2  1  1 18  0  1  1  4  1  1 17   4.1408     597
  3  1  1 17  0  0  0  1  1  1 18   4.1408     597
  3  1  1 18  0  0  0  1  1  1 17   4.1408     597
  4  1  1 17  0 -1 -1  2  1  1 18   4.1408     597
  1  1  1 18  0  0  0  3  2  1 17   4.1408     598
  3  1  1 17  0  0  0  1  2  1 18   4.1408     598
  3  1  1 18  0  0  0  1  2  1 17   4.1408     598
  4  1  1 17  0 -1 -1  2  2  1 18   4.1408     598
  1  2  1 17  0  0  0  3  1  1 18   4.1408     599
  1  2  1 18  0  0  0  3  1  1 17   4.1408     599
  2  2  1 18  0  1  1  4  1  1 17   4.1408     599
  3  2  1 17  0  0  0  1  1  1 18   4.1408     599
  1  2  1 18  0  0  0  3  2  1 17   4.1408     600
  3  2  1 17  0  0  0  1  2  1 18   4.1408     600
  2  1  1 17  0  1  1  4  1  1 18   4.1408     597
  4  1  1 18  0 -1 -1  2  1  1 17   4.1408     597
  1  1  1 17  0  0  0  3  2  1 18   4.1408     598
  2  1  1 18  0  1  1  4  2  1 17   4.1408     598
  4  1  1 18  0 -1 -1  2  2  1 17   4.1408     598
  2  2  1 17  0  1  1  4  1  1 18   4.1408     599
  3  2  1 18  0  0  0  1  1  1 17   4.1408     599
  4  2  1 17  0 -1 -1  2  1  1 18   4.1408     599
  1  2  1 17  0  0  0  3  2  1 18   4.1408     600
  2  2  1 18  0  1  1  4  2  1 17   4.1408     600
  3  2  1 18  0  0  0  1  2  1 17   4.1408     600
  4  2  1 17  0 -1 -1  2  2  1 18   4.1408     600
  2  1  1 17  0  1  1  4  2  1 18   4.1409     598
  4  2  1 18  0 -1 -1  2  1  1 17   4.1409     599
  2  2  1 17  0  1  1  4  2  1 18   4.1409     600
  4  2  1 18  0 -1 -1  2  2  1 17   4.1409     600
  1  1  1 10  1 -1  0  2  1  1 14   4.1462     601
  1  1  1 14  1  0  0  2  1  1 10   4.1462     601
  2  1  1 10 -1  0  0  1  1  1 14   4.1462     601
  2  1  1 14 -1  1  0  1  1  1 10   4.1462     601
  3  1  1 10 -1  1  0  4  1  1 14   4.1462     601
  3  1  1 14 -1  0  0  4  1  1 10   4.1462     601
  4  1  1 10  1  0  0  3  1  1 14   4.1462     601
  4  1  1 14  1 -1  0  3  1  1 10   4.1462     601
  2  1  1 10 -1  0  0  1  2  1 14   4.1462     602
  2  1  1 14 -1  1  0  1  2  1 10   4.1462     602
  3  1  1 10 -1  1  0  4  2  1 14   4.1462     602
  4  1  1 10  1  0  0  3  2  1 14   4.1462     602
  4  1  1 14  1 -1  0  3  2  1 10   4.1462     602
  1  2  1 10  1 -1  0  2  1  1 14   4.1462     603
  1  2  1 14  1  0  0  2  1  1 10   4.1462     603
  3  2  1 10 -1  1  0  4  1  1 14   4.1462     603
  3  2  1 14 -1  0  0  4  1  1 10   4.1462     603
  4  2  1 14  1 -1  0  3  1  1 10   4.1462     603
  3  2  1 10 -1  1  0  4  2  1 14   4.1462     604
  4  2  1 14  1 -1  0  3  2  1 10   4.1462     604
  1  1  1 10  1 -1  0  2  2  1 14   4.1462     602
  1  1  1 14  1  0  0  2  2  1 10   4.1462     602
  3  1  1 14 -1  0  0  4  2  1 10   4.1462     602
  2  2  1 10 -1  0  0  1  1  1 14   4.1462     603
  2  2  1 14 -1  1  0  1  1  1 10   4.1462     603
  4  2  1 10  1  0  0  3  1  1 14   4.1462     603
  1  2  1 10  1 -1  0  2  2  1 14   4.1462     604
  1  2  1 14  1  0  0  2  2  1 10   4.1462     604
  2  2  1 10 -1  0  0  1  2  1 14   4.1462     604
  2  2  1 14 -1  1  0  1  2  1 10   4.1462     604
  3  2  1 14 -1  0  0  4  2  1 10   4.1462     604
  4  2  1 10  1  0  0  3  2  1 14   4.1462     604
  4  1  1  7  0  0  0  1  2  1 27   4.1526     606
  1  2  1 27  0  0  0  4  1  1  7   4.1526     607
  1  2  1 27  0  0  0  4  2  1  7   4.1526     608
  2  2  1 27  0  0  1  3  2  1  7   4.1526     608
  3  2  1  7  0  0 -1  2  2  1 27   4.1526     608
  4  2  1  7  0  0  0  1  2  1 27   4.1526     608
  1  1  1  7  0  0  1  4  2  1 27   4.1526     606
  2  1  1  7  0  0  0  3  2  1 27   4.1526     606
  3  1  1  7  0  0 -1  2  2  1 27   4.1526     606
  2  2  1 27  0  0  1  3  1  1  7   4.1526     607
  3  2  1 27  0  0  0  2  1  1  7   4.1526     607
  4  2  1 27  0  0 -1  1  1  1  7   4.1526     607
  1  2  1  7  0  0  1  4  2  1 27   4.1526     608
  2  2  1  7  0  0  0  3  2  1 27   4.1526     608
  3  2  1 27  0  0  0  2  2  1  7   4.1526     608
  4  2  1 27  0  0 -1  1  2  1  7   4.1526     608
  4  1  1  5  1 -1  0  2  2  1 19   4.1626     610
  2  2  1 19 -1  1  0  4  1  1  5   4.1626     611
  2  2  1 19 -1  1  0  4  2  1  5   4.1626     612
  4  2  1  5  1 -1  0  2  2  1 19   4.1626     612
  2  1  1 19 -1  1  0  4  1  1  5   4.1626     609
  4  1  1  5  1 -1  0  2  1  1 19   4.1626     609
  2  1  1 19 -1  1  0  4  2  1  5   4.1626     610
  4  2  1  5  1 -1  0  2  1  1 19   4.1626     611
  1  1  1 19  1  0  1  3  2  1  5   4.1626     610
  3  2  1  5 -1  0 -1  1  1  1 19   4.1626     611
  1  2  1  5  1  0  1  3  2  1 19   4.1626     612
  1  2  1 19  1  0  1  3  2  1  5   4.1626     612
  2  2  1  5 -1  1  0  4  2  1 19   4.1626     612
  3  2  1  5 -1  0 -1  1  2  1 19   4.1626     612
  3  2  1 19 -1  0 -1  1  2  1  5   4.1626     612
  4  2  1 19  1 -1  0  2  2  1  5   4.1626     612
  1  1  1 19  1  0  1  3  1  1  5   4.1626     609
  3  1  1  5 -1  0 -1  1  1  1 19   4.1626     609
  1  1  1  5  1  0  1  3  2  1 19   4.1626     610
  2  1  1  5 -1  1  0  4  2  1 19   4.1626     610
  3  1  1  5 -1  0 -1  1  2  1 19   4.1626     610
  4  1  1 19  1 -1  0  2  2  1  5   4.1626     610
  1  2  1 19  1  0  1  3  1  1  5   4.1626     611
  2  2  1  5 -1  1  0  4  1  1 19   4.1626     611
  3  2  1 19 -1  0 -1  1  1  1  5   4.1626     611
  4  2  1 19  1 -1  0  2  1  1  5   4.1626     611
  1  1  1  5  1  0  1  3  1  1 19   4.1626     609
  2  1  1  5 -1  1  0  4  1  1 19   4.1626     609
  3  1  1 19 -1  0 -1  1  1  1  5   4.1626     609
  4  1  1 19  1 -1  0  2  1  1  5   4.1626     609
  3  1  1 19 -1  0 -1  1  2  1  5   4.1626     610
  1  2  1  5  1  0  1  3  1  1 19   4.1626     611
  1  1  1  5  2  0  1  3  2  1 27   4.1627     610
  3  2  1 27 -2  0 -1  1  1  1  5   4.1627     611
  1  2  1  5  2  0  1  3  2  1 27   4.1627     612
  3  2  1 27 -2  0 -1  1  2  1  5   4.1627     612
  2  1  1  5 -2  1  0  4  2  1 27   4.1627     610
  4  1  1  5  2 -1  0  2  2  1 27   4.1627     610
  2  2  1 27 -2  1  0  4  1  1  5   4.1627     611
  4  2  1 27  2 -1  0  2  1  1  5   4.1627     611
  2  2  1  5 -2  1  0  4  2  1 27   4.1627     612
  4  2  1 27  2 -1  0  2  2  1  5   4.1627     612
  3  1  1  5 -2  0 -1  1  2  1 27   4.1627     610
  1  2  1 27  2  0  1  3  1  1  5   4.1627     611
  1  2  1 27  2  0  1  3  2  1  5   4.1627     612
  2  2  1 27 -2  1  0  4  2  1  5   4.1627     612
  3  2  1  5 -2  0 -1  1  2  1 27   4.1627     612
  4  2  1  5  2 -1  0  2  2  1 27   4.1627     612
  3  1  1 13  0  0  0  4  1  1 27   4.1630     609
  4  1  1 27  0  0  0  3  1  1 13   4.1630     609
  1  1  1 13  0  0  0  2  1  1 27   4.1630     609
  1  1  1 27  0 -1  0  2  1  1 13   4.1630     609
  2  1  1 13  0  1  0  1  1  1 27   4.1630     609
  2  1  1 27  0  0  0  1  1  1 13   4.1630     609
  3  1  1 27  0  1  0  4  1  1 13   4.1630     609
  4  1  1 13  0 -1  0  3  1  1 27   4.1630     609
  1  1  1 27  0 -1  0  2  2  1 13   4.1630     610
  2  1  1 27  0  0  0  1  2  1 13   4.1630     610
  3  1  1 27  0  1  0  4  2  1 13   4.1630     610
  4  1  1 27  0  0  0  3  2  1 13   4.1630     610
  1  2  1 13  0  0  0  2  1  1 27   4.1630     611
  2  2  1 13  0  1  0  1  1  1 27   4.1630     611
  3  2  1 13  0  0  0  4  1  1 27   4.1630     611
  4  2  1 13  0 -1  0  3  1  1 27   4.1630     611
  1  1  1 15  1  0  1  3  1  1 24   4.1693     613
  2  1  1 15 -1  1  0  4  1  1 24   4.1693     613
  3  1  1 24 -1  0 -1  1  1  1 15   4.1693     613
  4  1  1 24  1 -1  0  2  1  1 15   4.1693     613
  2  1  1 15 -1  1  0  4  2  1 24   4.1693     614
  3  1  1 24 -1  0 -1  1  2  1 15   4.1693     614
  4  1  1 15  1 -1  0  2  2  1 24   4.1693     614
  4  1  1 24  1 -1  0  2  2  1 15   4.1693     614
  1  2  1 15  1  0  1  3  1  1 24   4.1693     615
  2  2  1 15 -1  1  0  4  1  1 24   4.1693     615
  2  2  1 24 -1  1  0  4  1  1 15   4.1693     615
  4  2  1 24  1 -1  0  2  1  1 15   4.1693     615
  2  2  1 15 -1  1  0  4  2  1 24   4.1693     616
  2  2  1 24 -1  1  0  4  2  1 15   4.1693     616
  4  2  1 15  1 -1  0  2  2  1 24   4.1693     616
  4  2  1 24  1 -1  0  2  2  1 15   4.1693     616
  1  1  1 24  1  0  1  3  1  1 15   4.1693     613
  2  1  1 24 -1  1  0  4  1  1 15   4.1693     613
  3  1  1 15 -1  0 -1  1  1  1 24   4.1693     613
  4  1  1 15  1 -1  0  2  1  1 24   4.1693     613
  1  1  1 15  1  0  1  3  2  1 24   4.1693     614
  1  1  1 24  1  0  1  3  2  1 15   4.1693     614
  2  1  1 24 -1  1  0  4  2  1 15   4.1693     614
  3  1  1 15 -1  0 -1  1  2  1 24   4.1693     614
  1  2  1 24  1  0  1  3  1  1 15   4.1693     615
  3  2  1 15 -1  0 -1  1  1  1 24   4.1693     615
  3  2  1 24 -1  0 -1  1  1  1 15   4.1693     615
  4  2  1 15  1 -1  0  2  1  1 24   4.1693     615
  1  2  1 15  1  0  1  3  2  1 24   4.1693     616
  1  2  1 24  1  0  1  3  2  1 15   4.1693     616
  3  2  1 15 -1  0 -1  1  2  1 24   4.1693     616
  3  2  1 24 -1  0 -1  1  2  1 15   4.1693     616
  1  1  1  6  1 -1  1  3  2  1 25   4.1754     618
  3  2  1 25 -1  1 -1  1  1  1  6   4.1754     619
  1  2  1  6  1 -1  1  3  2  1 25   4.1754     620
  3  2  1 25 -1  1 -1  1  2  1  6   4.1754     620
  1  1  1  6  1 -1  1  3  1  1 25   4.1754     617
  1  1  1 25  1 -1  1  3  1  1  6   4.1754     617
  2  1  1  6 -1  0  0  4  1  1 25   4.1754     617
  3  1  1  6 -1  1 -1  1  1  1 25   4.1754     617
  3  1  1 25 -1  1 -1  1  1  1  6   4.1754     617
  4  1  1 25  1  0  0  2  1  1  6   4.1754     617
  1  1  1 25  1 -1  1  3  2  1  6   4.1754     618
  2  1  1  6 -1  0  0  4  2  1 25   4.1754     618
  3  1  1  6 -1  1 -1  1  2  1 25   4.1754     618
  3  1  1 25 -1  1 -1  1  2  1  6   4.1754     618
  1  2  1  6  1 -1  1  3  1  1 25   4.1754     619
  1  2  1 25  1 -1  1  3  1  1  6   4.1754     619
  3  2  1  6 -1  1 -1  1  1  1 25   4.1754     619
  4  2  1 25  1  0  0  2  1  1  6   4.1754     619
  1  2  1 25  1 -1  1  3  2  1  6   4.1754     620
  3  2  1  6 -1  1 -1  1  2  1 25   4.1754     620
  2  1  1 25 -1  0  0  4  1  1  6   4.1754     617
  4  1  1  6  1  0  0  2  1  1 25   4.1754     617
  2  1  1 25 -1  0  0  4  2  1  6   4.1754     618
  4  1  1 25  1  0  0  2  2  1  6   4.1754     618
  2  2  1  6 -1  0  0  4  1  1 25   4.1754     619
  4  2  1  6  1  0  0  2  1  1 25   4.1754     619
  2  2  1  6 -1  0  0  4  2  1 25   4.1754     620
  2  2  1 25 -1  0  0  4  2  1  6   4.1754     620
  4  2  1  6  1  0  0  2  2  1 25   4.1754     620
  4  2  1 25  1  0  0  2  2  1  6   4.1754     620
  4  1  1  6  1  0  0  2  2  1 25   4.1754     618
  2  2  1 25 -1  0  0  4  1  1  6   4.1754     619
  2  1  1 22 -1  0  0  2  2  1 10   4.1807     622
  2  2  1 10  1  0  0  2  1  1 22   4.1807     623
  2  1  1 10  1  0  0  2  1  1 22   4.1807     621
  2  1  1 22 -1  0  0  2  1  1 10   4.1807     621
  3  1  1 10  1  0  0  3  1  1 22   4.1807     621
  3  1  1 22 -1  0  0  3  1  1 10   4.1807     621
  3  1  1 22 -1  0  0  3  2  1 10   4.1807     622
  1  2  1 10 -1  0  0  1  1  1 22   4.1807     623
  3  2  1 10  1  0  0  3  1  1 22   4.1807     623
  2  2  1 10  1  0  0  2  2  1 22   4.1807     624
  2  2  1 22 -1  0  0  2  2  1 10   4.1807     624
  1  1  1 10 -1  0  0  1  1  1 22   4.1807     621
  1  1  1 22  1  0  0  1  1  1 10   4.1807     621
  1  1  1 10 -1  0  0  1  2  1 22   4.1807     622
  1  1  1 22  1  0  0  1  2  1 10   4.1807     622
  2  1  1 10  1  0  0  2  2  1 22   4.1807     622
  4  1  1 22  1  0  0  4  2  1 10   4.1807     622
  1  2  1 22  1  0  0  1  1  1 10   4.1807     623
  2  2  1 22 -1  0  0  2  1  1 10   4.1807     623
  4  2  1 10 -1  0  0  4  1  1 22   4.1807     623
  1  2  1 10 -1  0  0  1  2  1 22   4.1807     624
  1  2  1 22  1  0  0  1  2  1 10   4.1807     624
  4  2  1 10 -1  0  0  4  2  1 22   4.1807     624
  4  2  1 22  1  0  0  4  2  1 10   4.1807     624
  3  1  1 10  1  0  0  3  2  1 22   4.1807     622
  3  2  1 22 -1  0  0  3  1  1 10   4.1807     623
  3  2  1 10  1  0  0  3  2  1 22   4.1807     624
  3  2  1 22 -1  0  0  3  2  1 10   4.1807     624
  4  1  1 10 -1  0  0  4  1  1 22   4.1807     621
  4  1  1 22  1  0  0  4  1  1 10   4.1807     621
  4  1  1 10 -1  0  0  4  2  1 22   4.1807     622
  4  2  1 22  1  0  0  4  1  1 10   4.1807     623
  1  1  1 10  1 -1  0  2  2  1 26   4.1815     622
  2  1  1 10 -1  0  0  1  2  1 26   4.1815     622
  2  2  1 26 -1  1  0  1  1  1 10   4.1815     623
  1  2  1 10  1 -1  0  2  2  1 26   4.1815     624
  2  2  1 26 -1  1  0  1  2  1 10   4.1815     624
  3  1  1 10 -1  1  0  4  2  1 26   4.1815     622
  4  1  1 10  1  0  0  3  2  1 26   4.1815     622
  1  2  1 26  1  0  0  2  1  1 10   4.1815     623
  3  2  1 26 -1  0  0  4  1  1 10   4.1815     623
  4  2  1 26  1 -1  0  3  1  1 10   4.1815     623
  1  2  1 26  1  0  0  2  2  1 10   4.1815     624
  2  2  1 10 -1  0  0  1  2  1 26   4.1815     624
  3  2  1 10 -1  1  0  4  2  1 26   4.1815     624
  3  2  1 26 -1  0  0  4  2  1 10   4.1815     624
  4  2  1 10  1  0  0  3  2  1 26   4.1815     624
  4  2  1 26  1 -1  0  3  2  1 10   4.1815     624
  4  1  1 12  1  0  0  3  2  1 21   4.1819     622
  3  2  1 21 -1  0  0  4  1  1 12   4.1819     623
  1  1  1 12  1 -1  0  2  2  1 21   4.1819     622
  2  1  1 12 -1  0  0  1  2  1 21   4.1819     622
  3  1  1 12 -1  1  0  4  2  1 21   4.1819     622
  1  2  1 21  1  0  0  2  1  1 12   4.1819     623
  2  2  1 21 -1  1  0  1  1  1 12   4.1819     623
  4  2  1 21  1 -1  0  3  1  1 12   4.1819     623
  1  2  1 12  1 -1  0  2  2  1 21   4.1819     624
  1  2  1 21  1  0  0  2  2  1 12   4.1819     624
  2  2  1 12 -1  0  0  1  2  1 21   4.1819     624
  2  2  1 21 -1  1  0  1  2  1 12   4.1819     624
  3  2  1 12 -1  1  0  4  2  1 21   4.1819     624
  3  2  1 21 -1  0  0  4  2  1 12   4.1819     624
  4  2  1 12  1  0  0  3  2  1 21   4.1819     624
  4  2  1 21  1 -1  0  3  2  1 12   4.1819     624
  4  1  1 23  0  0  0  1  2  1 27   4.1820     622
  1  2  1 27  0  0  0  4  1  1 23   4.1820     623
  1  2  1 27  0  0  0  4  2  1 23   4.1820     624
  2  2  1 27  0  0  1  3  2  1 23   4.1820     624
  3  2  1 23  0  0 -1  2  2  1 27   4.1820     624
  4  2  1 23  0  0  0  1  2  1 27   4.1820     624
  1  1  1 23  0  0  1  4  2  1 27   4.1821     622
  3  1  1 23  0  0 -1  2  2  1 27   4.1821     622
  2  2  1 27  0  0  1  3  1  1 23   4.1821     623
  4  2  1 27  0  0 -1  1  1  1 23   4.1821     623
  1  2  1 23  0  0  1  4  2  1 27   4.1821     624
  4  2  1 27  0  0 -1  1  2  1 23   4.1821     624
  2  1  1 23  0  0  0  3  2  1 27   4.1821     622
  3  2  1 27  0  0  0  2  1  1 23   4.1821     623
  2  2  1 23  0  0  0  3  2  1 27   4.1821     624
  3  2  1 27  0  0  0  2  2  1 23   4.1821     624
  2  1  1  3 -1  0  0  2  1  1 16   4.1850     621
  2  1  1 16  1  0  0  2  1  1  3   4.1850     621
  2  1  1  3 -1  0  0  2  2  1 16   4.1850     622
  2  2  1 16  1  0  0  2  1  1  3   4.1850     623
  1  1  1  3  1  0  0  1  1  1 16   4.1851     621
  1  1  1 16 -1  0  0  1  1  1  3   4.1851     621
  3  1  1  3 -1  0  0  3  1  1 16   4.1851     621
  3  1  1 16  1  0  0  3  1  1  3   4.1851     621
  1  1  1  3  1  0  0  1  2  1 16   4.1851     622
  1  1  1 16 -1  0  0  1  2  1  3   4.1851     622
  2  1  1 16  1  0  0  2  2  1  3   4.1851     622
  1  2  1  3  1  0  0  1  1  1 16   4.1851     623
  1  2  1 16 -1  0  0  1  1  1  3   4.1851     623
  2  2  1  3 -1  0  0  2  1  1 16   4.1851     623
  1  2  1  3  1  0  0  1  2  1 16   4.1851     624
  1  2  1 16 -1  0  0  1  2  1  3   4.1851     624
  2  2  1  3 -1  0  0  2  2  1 16   4.1851     624
  2  2  1 16  1  0  0  2  2  1  3   4.1851     624
  3  1  1  3 -1  0  0  3  2  1 16   4.1851     622
  3  1  1 16  1  0  0  3  2  1  3   4.1851     622
  4  1  1  3  1  0  0  4  2  1 16   4.1851     622
  3  2  1  3 -1  0  0  3  1  1 16   4.1851     623
  3  2  1 16  1  0  0  3  1  1  3   4.1851     623
  4  2  1 16 -1  0  0  4  1  1  3   4.1851     623
  4  2  1  3  1  0  0  4  2  1 16   4.1851     624
  4  2  1 16 -1  0  0  4  2  1  3   4.1851     624
  3  2  1  3 -1  0  0  3  2  1 16   4.1851     624
  3  2  1 16  1  0  0  3  2  1  3   4.1851     624
  4  1  1  3  1  0  0  4  1  1 16   4.1851     621
  4  1  1 16 -1  0  0  4  1  1  3   4.1851     621
  4  1  1 16 -1  0  0  4  2  1  3   4.1851     622
  4  2  1  3  1  0  0  4  1  1 16   4.1851     623
  4  1  1 22  1 -1  0  2  2  1 15   4.1916     626
  2  2  1 15 -1  1  0  4  1  1 22   4.1916     627
  2  1  1 15 -1  1  0  4  1  1 22   4.1916     625
  4  1  1 22  1 -1  0  2  1  1 15   4.1916     625
  2  1  1 15 -1  1  0  4  2  1 22   4.1916     626
  4  2  1 22  1 -1  0  2  1  1 15   4.1916     627
  1  2  1 15  1  0  1  3  2  1 22   4.1916     628
  2  2  1 15 -1  1  0  4  2  1 22   4.1916     628
  3  2  1 22 -1  0 -1  1  2  1 15   4.1916     628
  4  2  1 22  1 -1  0  2  2  1 15   4.1916     628
  1  1  1 15  1  0  1  3  2  1 22   4.1916     626
  3  2  1 22 -1  0 -1  1  1  1 15   4.1916     627
  2  2  1 22 -1  1  0  4  2  1 15   4.1916     628
  4  2  1 15  1 -1  0  2  2  1 22   4.1916     628
  1  1  1 22  1  0  1  3  2  1 15   4.1916     626
  2  1  1 22 -1  1  0  4  2  1 15   4.1916     626
  4  1  1 15  1 -1  0  2  2  1 22   4.1916     626
  1  2  1 15  1  0  1  3  1  1 22   4.1916     627
  2  2  1 22 -1  1  0  4  1  1 15   4.1916     627
  3  2  1 15 -1  0 -1  1  1  1 22   4.1916     627
  4  2  1 15  1 -1  0  2  1  1 22   4.1916     627
  1  2  1 22  1  0  1  3  2  1 15   4.1916     628
  3  2  1 15 -1  0 -1  1  2  1 22   4.1916     628
  1  1  1 15  1  0  1  3  1  1 22   4.1917     625
  1  1  1 22  1  0  1  3  1  1 15   4.1917     625
  2  1  1 22 -1  1  0  4  1  1 15   4.1917     625
  3  1  1 15 -1  0 -1  1  1  1 22   4.1917     625
  3  1  1 22 -1  0 -1  1  1  1 15   4.1917     625
  4  1  1 15  1 -1  0  2  1  1 22   4.1917     625
  3  1  1 15 -1  0 -1  1  2  1 22   4.1917     626
  3  1  1 22 -1  0 -1  1  2  1 15   4.1917     626
  1  2  1 22  1  0  1  3  1  1 15   4.1917     627
  1  2  1 13 -1  0  0  1  2  1 27   4.1989     632
  1  2  1 27  1  0  0  1  2  1 13   4.1989     632
  2  2  1 13  1  0  0  2  2  1 27   4.1989     632
  2  2  1 27 -1  0  0  2  2  1 13   4.1989     632
  1  1  1 13 -1  0  0  1  2  1 27   4.1989     630
  2  1  1 13  1  0  0  2  2  1 27   4.1989     630
  3  1  1 13  1  0  0  3  2  1 27   4.1989     630
  1  2  1 27  1  0  0  1  1  1 13   4.1989     631
  2  2  1 27 -1  0  0  2  1  1 13   4.1989     631
  3  2  1 27 -1  0  0  3  1  1 13   4.1989     631
  3  2  1 13  1  0  0  3  2  1 27   4.1989     632
  3  2  1 27 -1  0  0  3  2  1 13   4.1989     632
  4  2  1 13 -1  0  0  4  2  1 27   4.1989     632
  4  2  1 27  1  0  0  4  2  1 13   4.1989     632
  4  2  1 27  1  0  0  4  1  1 13   4.1989     631
  4  1  1 13 -1  0  0  4  2  1 27   4.1989     630
  2  1  1 28 -1  1  0  4  1  1  4   4.2038     629
  4  1  1  4  1 -1  0  2  1  1 28   4.2038     629
  1  1  1  4  1  0  1  3  1  1 28   4.2038     629
  1  1  1 28  1  0  1  3  1  1  4   4.2038     629
  3  1  1  4 -1  0 -1  1  1  1 28   4.2038     629
  3  1  1 28 -1  0 -1  1  1  1  4   4.2038     629
  1  1  1 28  1  0  1  3  2  1  4   4.2038     630
  2  1  1 28 -1  1  0  4  2  1  4   4.2038     630
  3  1  1 28 -1  0 -1  1  2  1  4   4.2038     630
  4  1  1 28  1 -1  0  2  2  1  4   4.2038     630
  1  2  1  4  1  0  1  3  1  1 28   4.2038     631
  2  2  1  4 -1  1  0  4  1  1 28   4.2038     631
  3  2  1  4 -1  0 -1  1  1  1 28   4.2038     631
  4  2  1  4  1 -1  0  2  1  1 28   4.2038     631
  2  1  1  4 -1  1  0  4  1  1 28   4.2038     629
  4  1  1 28  1 -1  0  2  1  1  4   4.2038     629
  2  1  1 18 -1  1  0  4  1  1  6   4.2072     633
  4  1  1  6  1 -1  0  2  1  1 18   4.2072     633
  2  1  1 18 -1  1  0  4  2  1  6   4.2072     634
  4  1  1  6  1 -1  0  2  2  1 18   4.2072     634
  2  2  1 18 -1  1  0  4  1  1  6   4.2072     635
  4  2  1  6  1 -1  0  2  1  1 18   4.2072     635
  2  2  1  6 -1  1  0  4  2  1 18   4.2072     636
  2  2  1 18 -1  1  0  4  2  1  6   4.2072     636
  4  2  1  6  1 -1  0  2  2  1 18   4.2072     636
  4  2  1 18  1 -1  0  2  2  1  6   4.2072     636
  1  1  1  6  1  0  1  3  2  1 18   4.2072     634
  1  1  1 18  1  0  1  3  2  1  6   4.2072     634
  2  1  1  6 -1  1  0  4  2  1 18   4.2072     634
  4  1  1 18  1 -1  0  2  2  1  6   4.2072     634
  2  2  1  6 -1  1  0  4  1  1 18   4.2072     635
  3  2  1  6 -1  0 -1  1  1  1 18   4.2072     635
  3  2  1 18 -1  0 -1  1  1  1  6   4.2072     635
  4  2  1 18  1 -1  0  2  1  1  6   4.2072     635
  1  2  1  6  1  0  1  3  2  1 18   4.2072     636
  1  2  1 18  1  0  1  3  2  1  6   4.2072     636
  3  2  1  6 -1  0 -1  1  2  1 18   4.2072     636
  3  2  1 18 -1  0 -1  1  2  1  6   4.2072     636
  1  1  1  6  1  0  1  3  1  1 18   4.2072     633
  1  1  1 18  1  0  1  3  1  1  6   4.2072     633
  2  1  1  6 -1  1  0  4  1  1 18   4.2072     633
  3  1  1  6 -1  0 -1  1  1  1 18   4.2072     633
  3  1  1 18 -1  0 -1  1  1  1  6   4.2072     633
  4  1  1 18  1 -1  0  2  1  1  6   4.2072     633
  3  1  1  6 -1  0 -1  1  2  1 18   4.2072     634
  3  1  1 18 -1  0 -1  1  2  1  6   4.2072     634
  1  2  1  6  1  0  1  3  1  1 18   4.2072     635
  1  2  1 18  1  0  1  3  1  1  6   4.2072     635
  1  1  1  8  1 -1  1  3  2  1 25   4.2074     634
  3  2  1 25 -1  1 -1  1  1  1  8   4.2074     635
  1  2  1  8  1 -1  1  3  2  1 25   4.2074     636
  3  2  1 25 -1  1 -1  1  2  1  8   4.2074     636
  1  1  1  8  1 -1  1  3  1  1 25   4.2074     633
  1  1  1 25  1 -1  1  3  1  1  8   4.2074     633
  2  1  1  8 -1  0  0  4  1  1 25   4.2074     633
  2  1  1 25 -1  0  0  4  1  1  8   4.2074     633
  3  1  1  8 -1  1 -1  1  1  1 25   4.2074     633
  3  1  1 25 -1  1 -1  1  1  1  8   4.2074     633
  4  1  1  8  1  0  0  2  1  1 25   4.2074     633
  4  1  1 25  1  0  0  2  1  1  8   4.2074     633
  1  1  1 25  1 -1  1  3  2  1  8   4.2074     634
  3  1  1  8 -1  1 -1  1  2  1 25   4.2074     634
  3  1  1 25 -1  1 -1  1  2  1  8   4.2074     634
  4  1  1 25  1  0  0  2  2  1  8   4.2074     634
  1  2  1  8  1 -1  1  3  1  1 25   4.2074     635
  1  2  1 25  1 -1  1  3  1  1  8   4.2074     635
  2  2  1  8 -1  0  0  4  1  1 25   4.2074     635
  3  2  1  8 -1  1 -1  1  1  1 25   4.2074     635
  1  2  1 25  1 -1  1  3  2  1  8   4.2074     636
  3  2  1  8 -1  1 -1  1  2  1 25   4.2074     636
  2  1  1  8 -1  0  0  4  2  1 25   4.2074     634
  2  1  1 25 -1  0  0  4  2  1  8   4.2074     634
  4  1  1  8  1  0  0  2  2  1 25   4.2074     634
  2  2  1 25 -1  0  0  4  1  1  8   4.2074     635
  4  2  1  8  1  0  0  2  1  1 25   4.2074     635
  4  2  1 25  1  0  0  2  1  1  8   4.2074     635
  2  2  1  8 -1  0  0  4  2  1 25   4.2074     636
  2  2  1 25 -1  0  0  4  2  1  8   4.2074     636
  4  2  1  8  1  0  0  2  2  1 25   4.2074     636
  4  2  1 25  1  0  0  2  2  1  8   4.2074     636
  1  1  1 14  1  0  0  2  1  1  2   4.2120     633
  2  1  1  2 -1  0  0  1  1  1 14   4.2120     633
  3  1  1  2 -1  1  0  4  1  1 14   4.2120     633
  4  1  1 14  1 -1  0  3  1  1  2   4.2120     633
  2  1  1  2 -1  0  0  1  2  1 14   4.2120     634
  3  1  1  2 -1  1  0  4  2  1 14   4.2120     634
  1  2  1 14  1  0  0  2  1  1  2   4.2120     635
  4  2  1 14  1 -1  0  3  1  1  2   4.2120     635
  1  1  1  2  1 -1  0  2  1  1 14   4.2120     633
  2  1  1 14 -1  1  0  1  1  1  2   4.2120     633
  3  1  1 14 -1  0  0  4  1  1  2   4.2120     633
  4  1  1  2  1  0  0  3  1  1 14   4.2120     633
  1  1  1  2  1 -1  0  2  2  1 14   4.2120     634
  1  1  1 14  1  0  0  2  2  1  2   4.2120     634
  2  1  1 14 -1  1  0  1  2  1  2   4.2120     634
  3  1  1 14 -1  0  0  4  2  1  2   4.2120     634
  4  1  1  2  1  0  0  3  2  1 14   4.2120     634
  4  1  1 14  1 -1  0  3  2  1  2   4.2120     634
  1  2  1  2  1 -1  0  2  1  1 14   4.2120     635
  2  2  1  2 -1  0  0  1  1  1 14   4.2120     635
  2  2  1 14 -1  1  0  1  1  1  2   4.2120     635
  3  2  1  2 -1  1  0  4  1  1 14   4.2120     635
  3  2  1 14 -1  0  0  4  1  1  2   4.2120     635
  4  2  1  2  1  0  0  3  1  1 14   4.2120     635
  1  2  1  2  1 -1  0  2  2  1 14   4.2120     636
  1  2  1 14  1  0  0  2  2  1  2   4.2120     636
  2  2  1  2 -1  0  0  1  2  1 14   4.2120     636
  2  2  1 14 -1  1  0  1  2  1  2   4.2120     636
  3  2  1  2 -1  1  0  4  2  1 14   4.2120     636
  3  2  1 14 -1  0  0  4  2  1  2   4.2120     636
  4  2  1  2  1  0  0  3  2  1 14   4.2120     636
  4  2  1 14  1 -1  0  3  2  1  2   4.2120     636
  3  1  1 16 -1  1  0  4  1  1 19   4.2242     637
  3  1  1 19 -1  0  0  4  1  1 16   4.2242     637
  4  1  1 16  1  0  0  3  1  1 19   4.2242     637
  4  1  1 19  1 -1  0  3  1  1 16   4.2242     637
  4  1  1 16  1  0  0  3  2  1 19   4.2242     638
  4  1  1 19  1 -1  0  3  2  1 16   4.2242     638
  3  2  1 16 -1  1  0  4  1  1 19   4.2242     639
  3  2  1 19 -1  0  0  4  1  1 16   4.2242     639
  3  2  1 16 -1  1  0  4  2  1 19   4.2242     640
  4  2  1 19  1 -1  0  3  2  1 16   4.2242     640
  1  1  1 16  1 -1  0  2  1  1 19   4.2242     637
  1  1  1 19  1  0  0  2  1  1 16   4.2242     637
  2  1  1 16 -1  0  0  1  1  1 19   4.2242     637
  2  1  1 19 -1  1  0  1  1  1 16   4.2242     637
  1  1  1 19  1  0  0  2  2  1 16   4.2242     638
  2  1  1 16 -1  0  0  1  2  1 19   4.2242     638
  2  1  1 19 -1  1  0  1  2  1 16   4.2242     638
  3  1  1 16 -1  1  0  4  2  1 19   4.2242     638
  1  2  1 16  1 -1  0  2  1  1 19   4.2242     639
  2  2  1 16 -1  0  0  1  1  1 19   4.2242     639
  4  2  1 19  1 -1  0  3  1  1 16   4.2242     639
  1  2  1 19  1  0  0  2  2  1 16   4.2242     640
  2  2  1 16 -1  0  0  1  2  1 19   4.2242     640
  1  1  1 16  1 -1  0  2  2  1 19   4.2242     638
  3  1  1 19 -1  0  0  4  2  1 16   4.2242     638
  1  2  1 19  1  0  0  2  1  1 16   4.2242     639
  2  2  1 19 -1  1  0  1  1  1 16   4.2242     639
  4  2  1 16  1  0  0  3  1  1 19   4.2242     639
  1  2  1 16  1 -1  0  2  2  1 19   4.2242     640
  2  2  1 19 -1  1  0  1  2  1 16   4.2242     640
  3  2  1 19 -1  0  0  4  2  1 16   4.2242     640
  4  2  1 16  1  0  0  3  2  1 19   4.2242     640
  2  1  1  5 -2  1  0  4  2  1 28   4.2245     638
  4  2  1 28  2 -1  0  2  1  1  5   4.2245     639
  2  2  1  5 -2  1  0  4  2  1 28   4.2245     640
  4  2  1 28  2 -1  0  2  2  1  5   4.2245     640
  1  1  1  5  2  0  1  3  2  1 28   4.2245     638
  3  1  1  5 -2  0 -1  1  2  1 28   4.2245     638
  4  1  1  5  2 -1  0  2  2  1 28   4.2245     638
  1  2  1 28  2  0  1  3  1  1  5   4.2245     639
  2  2  1 28 -2  1  0  4  1  1  5   4.2245     639
  3  2  1 28 -2  0 -1  1  1  1  5   4.2245     639
  1  2  1  5  2  0  1  3  2  1 28   4.2245     640
  1  2  1 28  2  0  1  3  2  1  5   4.2245     640
  3  2  1  5 -2  0 -1  1  2  1 28   4.2245     640
  3  2  1 28 -2  0 -1  1  2  1  5   4.2245     640
  2  2  1 28 -2  1  0  4  2  1  5   4.2245     640
  4  2  1  5  2 -1  0  2  2  1 28   4.2245     640
  2  1  1 25 -1  1  0  4  1  1 14   4.2297     641
  4  1  1 14  1 -1  0  2  1  1 25   4.2297     641
  1  1  1 25  1  0  1  3  2  1 14   4.2297     642
  2  1  1 25 -1  1  0  4  2  1 14   4.2297     642
  4  1  1 14  1 -1  0  2  2  1 25   4.2297     642
  2  2  1 25 -1  1  0  4  1  1 14   4.2297     643
  3  2  1 14 -1  0 -1  1  1  1 25   4.2297     643
  4  2  1 14  1 -1  0  2  1  1 25   4.2297     643
  1  2  1 25  1  0  1  3  2  1 14   4.2297     644
  2  2  1 25 -1  1  0  4  2  1 14   4.2297     644
  3  2  1 14 -1  0 -1  1  2  1 25   4.2297     644
  4  2  1 14  1 -1  0  2  2  1 25   4.2297     644
  1  1  1 14  1  0  1  3  1  1 25   4.2297     641
  2  1  1 14 -1  1  0  4  1  1 25   4.2297     641
  3  1  1 25 -1  0 -1  1  1  1 14   4.2297     641
  4  1  1 25  1 -1  0  2  1  1 14   4.2297     641
  1  1  1 14  1  0  1  3  2  1 25   4.2297     642
  2  1  1 14 -1  1  0  4  2  1 25   4.2297     642
  3  1  1 25 -1  0 -1  1  2  1 14   4.2297     642
  4  1  1 25  1 -1  0  2  2  1 14   4.2297     642
  1  2  1 14  1  0  1  3  1  1 25   4.2297     643
  2  2  1 14 -1  1  0  4  1  1 25   4.2297     643
  3  2  1 25 -1  0 -1  1  1  1 14   4.2297     643
  4  2  1 25  1 -1  0  2  1  1 14   4.2297     643
  1  2  1 14  1  0  1  3  2  1 25   4.2297     644
  2  2  1 14 -1  1  0  4  2  1 25   4.2297     644
  3  2  1 25 -1  0 -1  1  2  1 14   4.2297     644
  4  2  1 25  1 -1  0  2  2  1 14   4.2297     644
  1  1  1 25  1  0  1  3  1  1 14   4.2297     641
  3  1  1 14 -1  0 -1  1  1  1 25   4.2297     641
  3  1  1 14 -1  0 -1  1  2  1 25   4.2297     642
  1  2  1 25  1  0  1  3  1  1 14   4.2297     643
  1  1  1  7  1 -1  1  3  1  1  7   4.2305     641
  3  1  1  7 -1  1 -1  1  1  1  7   4.2305     641
  1  1  1  7  1 -1  1  3  2  1  7   4.2305     642
  3  1  1  7 -1  1 -1  1  2  1  7   4.2305     642
  1  2  1  7  1 -1  1  3  1  1  7   4.2305     643
  3  2  1  7 -1  1 -1  1  1  1  7   4.2305     643
  1  2  1  7  1 -1  1  3  2  1  7   4.2305     644
  3  2  1  7 -1  1 -1  1  2  1  7   4.2305     644
  2  1  1  7 -1  0  0  4  1  1  7   4.2305     641
  4  1  1  7  1  0  0  2  1  1  7   4.2305     641
  2  1  1  7 -1  0  0  4  2  1  7   4.2305     642
  4  1  1  7  1  0  0  2  2  1  7   4.2305     642
  2  2  1  7 -1  0  0  4  1  1  7   4.2305     643
  4  2  1  7  1  0  0  2  1  1  7   4.2305     643
  2  2  1  7 -1  0  0  4  2  1  7   4.2305     644
  4  2  1  7  1  0  0  2  2  1  7   4.2305     644
  2  1  1 14 -1  1  0  4  1  1  4   4.2315     641
  4  1  1  4  1 -1  0  2  1  1 14   4.2315     641
  4  1  1  4  1 -1  0  2  2  1 14   4.2315     642
  2  2  1 14 -1  1  0  4  1  1  4   4.2315     643
  2  2  1 14 -1  1  0  4  2  1  4   4.2315     644
  4  2  1  4  1 -1  0  2  2  1 14   4.2315     644
  1  1  1 14  1  0  1  3  2  1  4   4.2315     642
  2  1  1 14 -1  1  0  4  2  1  4   4.2315     642
  3  2  1  4 -1  0 -1  1  1  1 14   4.2315     643
  4  2  1  4  1 -1  0  2  1  1 14   4.2315     643
  1  2  1 14  1  0  1  3  2  1  4   4.2315     644
  3  2  1  4 -1  0 -1  1  2  1 14   4.2315     644
  1  1  1  4  1  0  1  3  2  1 14   4.2316     642
  4  1  1 14  1 -1  0  2  2  1  4   4.2316     642
  2  2  1  4 -1  1  0  4  1  1 14   4.2316     643
  3  2  1 14 -1  0 -1  1  1  1  4   4.2316     643
  1  2  1  4  1  0  1  3  2  1 14   4.2316     644
  2  2  1  4 -1  1  0  4  2  1 14   4.2316     644
  3  2  1 14 -1  0 -1  1  2  1  4   4.2316     644
  4  2  1 14  1 -1  0  2  2  1  4   4.2316     644
  1  1  1  4  1  0  1  3  1  1 14   4.2316     641
  1  1  1 14  1  0  1  3  1  1  4   4.2316     641
  2  1  1  4 -1  1  0  4  1  1 14   4.2316     641
  3  1  1  4 -1  0 -1  1  1  1 14   4.2316     641
  3  1  1 14 -1  0 -1  1  1  1  4   4.2316     641
  4  1  1 14  1 -1  0  2  1  1  4   4.2316     641
  2  1  1  4 -1  1  0  4  2  1 14   4.2316     642
  3  1  1  4 -1  0 -1  1  2  1 14   4.2316     642
  3  1  1 14 -1  0 -1  1  2  1  4   4.2316     642
  1  2  1  4  1  0  1  3  1  1 14   4.2316     643
  1  2  1 14  1  0  1  3  1  1  4   4.2316     643
  4  2  1 14  1 -1  0  2  1  1  4   4.2316     643
  2  1  1  8 -1  1  0  4  1  1 22   4.2323     641
  4  1  1 22  1 -1  0  2  1  1  8   4.2323     641
  4  1  1 22  1 -1  0  2  2  1  8   4.2323     642
  2  2  1  8 -1  1  0  4  1  1 22   4.2323     643
  2  2  1  8 -1  1  0  4  2  1 22   4.2323     644
  2  2  1 22 -1  1  0  4  2  1  8   4.2323     644
  4  2  1  8  1 -1  0  2  2  1 22   4.2323     644
  4  2  1 22  1 -1  0  2  2  1  8   4.2323     644
  1  1  1  8  1  0  1  3  2  1 22   4.2323     642
  2  1  1  8 -1  1  0  4  2  1 22   4.2323     642
  2  1  1 22 -1  1  0  4  2  1  8   4.2323     642
  3  1  1  8 -1  0 -1  1  2  1 22   4.2323     642
  4  1  1  8  1 -1  0  2  2  1 22   4.2323     642
  1  2  1 22  1  0  1  3  1  1  8   4.2323     643
  2  2  1 22 -1  1  0  4  1  1  8   4.2323     643
  3  2  1  8 -1  0 -1  1  1  1 22   4.2323     643
  3  2  1 22 -1  0 -1  1  1  1  8   4.2323     643
  4  2  1  8  1 -1  0  2  1  1 22   4.2323     643
  4  2  1 22  1 -1  0  2  1  1  8   4.2323     643
  1  2  1  8  1  0  1  3  2  1 22   4.2323     644
  1  2  1 22  1  0  1  3  2  1  8   4.2323     644
  3  2  1  8 -1  0 -1  1  2  1 22   4.2323     644
  3  2  1 22 -1  0 -1  1  2  1  8   4.2323     644
  1  1  1  8  1  0  1  3  1  1 22   4.2323     641
  1  1  1 22  1  0  1  3  1  1  8   4.2323     641
  2  1  1 22 -1  1  0  4  1  1  8   4.2323     641
  3  1  1  8 -1  0 -1  1  1  1 22   4.2323     641
  3  1  1 22 -1  0 -1  1  1  1  8   4.2323     641
  4  1  1  8  1 -1  0  2  1  1 22   4.2323     641
  1  1  1 22  1  0  1  3  2  1  8   4.2323     642
  3  1  1 22 -1  0 -1  1  2  1  8   4.2323     642
  1  2  1  8  1  0  1  3  1  1 22   4.2323     643
  1  1  1  8  1 -1  0  2  2  1 28   4.2403     646
  2  1  1  8 -1  0  0  1  2  1 28   4.2403     646
  3  1  1  8 -1  1  0  4  2  1 28   4.2403     646
  1  2  1 28  1  0  0  2  1  1  8   4.2403     647
  2  2  1 28 -1  1  0  1  1  1  8   4.2403     647
  1  2  1  8  1 -1  0  2  2  1 28   4.2403     648
  2  2  1 28 -1  1  0  1  2  1  8   4.2403     648
  4  2  1 28  1 -1  0  3  1  1  8   4.2403     647
  1  2  1 28  1  0  0  2  2  1  8   4.2403     648
  2  2  1  8 -1  0  0  1  2  1 28   4.2403     648
  3  2  1  8 -1  1  0  4  2  1 28   4.2403     648
  3  2  1 28 -1  0  0  4  2  1  8   4.2403     648
  4  2  1  8  1  0  0  3  2  1 28   4.2403     648
  4  2  1 28  1 -1  0  3  2  1  8   4.2403     648
  4  1  1  8  1  0  0  3  2  1 28   4.2403     646
  3  2  1 28 -1  0  0  4  1  1  8   4.2403     647
  2  1  1  9  1  0  0  2  1  1 22   4.2417     645
  2  1  1 22 -1  0  0  2  1  1  9   4.2417     645
  2  1  1 22 -1  0  0  2  2  1  9   4.2417     646
  2  2  1  9  1  0  0  2  1  1 22   4.2417     647
  1  1  1  9 -1  0  0  1  1  1 22   4.2417     645
  1  1  1 22  1  0  0  1  1  1  9   4.2417     645
  3  1  1  9  1  0  0  3  1  1 22   4.2417     645
  3  1  1 22 -1  0  0  3  1  1  9   4.2417     645
  1  1  1  9 -1  0  0  1  2  1 22   4.2417     646
  1  1  1 22  1  0  0  1  2  1  9   4.2417     646
  2  1  1  9  1  0  0  2  2  1 22   4.2417     646
  3  1  1 22 -1  0  0  3  2  1  9   4.2417     646
  4  1  1 22  1  0  0  4  2  1  9   4.2417     646
  1  2  1  9 -1  0  0  1  1  1 22   4.2417     647
  1  2  1 22  1  0  0  1  1  1  9   4.2417     647
  2  2  1 22 -1  0  0  2  1  1  9   4.2417     647
  3  2  1  9  1  0  0  3  1  1 22   4.2417     647
  4  2  1  9 -1  0  0  4  1  1 22   4.2417     647
  1  2  1  9 -1  0  0  1  2  1 22   4.2417     648
  1  2  1 22  1  0  0  1  2  1  9   4.2417     648
  2  2  1  9  1  0  0  2  2  1 22   4.2417     648
  2  2  1 22 -1  0  0  2  2  1  9   4.2417     648
  4  2  1  9 -1  0  0  4  2  1 22   4.2417     648
  4  2  1 22  1  0  0  4  2  1  9   4.2417     648
  4  1  1 22  1  0  0  4  1  1  9   4.2417     645
  3  1  1  9  1  0  0  3  2  1 22   4.2417     646
  4  1  1  9 -1  0  0  4  2  1 22   4.2417     646
  3  2  1 22 -1  0  0  3  1  1  9   4.2417     647
  4  2  1 22  1  0  0  4  1  1  9   4.2417     647
  3  2  1  9  1  0  0  3  2  1 22   4.2417     648
  3  2  1 22 -1  0  0  3  2  1  9   4.2417     648
  4  1  1  9 -1  0  0  4  1  1 22   4.2417     645
  4  1  1  2  1 -1  0  2  2  1  2   4.2423     646
  2  2  1  2 -1  1  0  4  1  1  2   4.2423     647
  2  2  1  2 -1  1  0  4  2  1  2   4.2423     648
  4  2  1  2  1 -1  0  2  2  1  2   4.2423     648
  2  1  1  2 -1  1  0  4  1  1  2   4.2423     645
  4  1  1  2  1 -1  0  2  1  1  2   4.2423     645
  1  1  1  2  1  0  1  3  2  1  2   4.2423     646
  2  1  1  2 -1  1  0  4  2  1  2   4.2423     646
  3  2  1  2 -1  0 -1  1  1  1  2   4.2423     647
  4  2  1  2  1 -1  0  2  1  1  2   4.2423     647
  1  2  1  2  1  0  1  3  2  1  2   4.2423     648
  3  2  1  2 -1  0 -1  1  2  1  2   4.2423     648
  1  1  1  2  1  0  1  3  1  1  2   4.2424     645
  2  1  1  2 -1  0  0  2  1  1 16   4.2424     645
  2  1  1 16  1  0  0  2  1  1  2   4.2424     645
  3  1  1  2 -1  0 -1  1  1  1  2   4.2424     645
  2  1  1  2 -1  0  0  2  2  1 16   4.2424     646
  3  1  1  2 -1  0 -1  1  2  1  2   4.2424     646
  4  1  1  2  1  0  0  4  2  1 16   4.2424     646
  1  2  1  2  1  0  1  3  1  1  2   4.2424     647
  2  2  1 16  1  0  0  2  1  1  2   4.2424     647
  4  2  1 16 -1  0  0  4  1  1  2   4.2424     647
  1  1  1  2  1  0  0  1  1  1 16   4.2424     645
  1  1  1 16 -1  0  0  1  1  1  2   4.2424     645
  3  1  1  2 -1  0  0  3  1  1 16   4.2424     645
  3  1  1 16  1  0  0  3  1  1  2   4.2424     645
  1  1  1  2  1  0  0  1  2  1 16   4.2424     646
  1  1  1 16 -1  0  0  1  2  1  2   4.2424     646
  2  1  1 16  1  0  0  2  2  1  2   4.2424     646
  3  1  1  2 -1  0  0  3  2  1 16   4.2424     646
  3  1  1 16  1  0  0  3  2  1  2   4.2424     646
  1  2  1  2  1  0  0  1  1  1 16   4.2424     647
  1  2  1 16 -1  0  0  1  1  1  2   4.2424     647
  2  2  1  2 -1  0  0  2  1  1 16   4.2424     647
  3  2  1  2 -1  0  0  3  1  1 16   4.2424     647
  3  2  1 16  1  0  0  3  1  1  2   4.2424     647
  1  2  1  2  1  0  0  1  2  1 16   4.2424     648
  1  2  1 16 -1  0  0  1  2  1  2   4.2424     648
  2  2  1  2 -1  0  0  2  2  1 16   4.2424     648
  2  2  1 16  1  0  0  2  2  1  2   4.2424     648
  4  2  1  2  1  0  0  4  2  1 16   4.2424     648
  4  2  1 16 -1  0  0  4  2  1  2   4.2424     648
  4  1  1  2  1  0  0  4  1  1 16   4.2424     645
  4  1  1 16 -1  0  0  4  1  1  2   4.2424     645
  3  2  1  2 -1  0  0  3  2  1 16   4.2424     648
  3  2  1 16  1  0  0  3  2  1  2   4.2424     648
  4  1  1 16 -1  0  0  4  2  1  2   4.2424     646
  4  2  1  2  1  0  0  4  1  1 16   4.2424     647
  1  1  1 11  0 -1  0  2  1  1 18   4.2442     645
  1  1  1 18  0  0  0  2  1  1 11   4.2442     645
  2  1  1 11  0  0  0  1  1  1 18   4.2442     645
  2  1  1 18  0  1  0  1  1  1 11   4.2442     645
  1  1  1 11  0 -1  0  2  2  1 18   4.2442     646
  1  1  1 18  0  0  0  2  2  1 11   4.2442     646
  2  1  1 11  0  0  0  1  2  1 18   4.2442     646
  2  1  1 18  0  1  0  1  2  1 11   4.2442     646
  1  2  1 11  0 -1  0  2  1  1 18   4.2442     647
  1  2  1 18  0  0  0  2  1  1 11   4.2442     647
  2  2  1 11  0  0  0  1  1  1 18   4.2442     647
  2  2  1 18  0  1  0  1  1  1 11   4.2442     647
  1  2  1 11  0 -1  0  2  2  1 18   4.2442     648
  1  2  1 18  0  0  0  2  2  1 11   4.2442     648
  2  2  1 11  0  0  0  1  2  1 18   4.2442     648
  2  2  1 18  0  1  0  1  2  1 11   4.2442     648
  3  2  1 18  0  0  0  4  2  1 11   4.2442     648
  4  2  1 11  0  0  0  3  2  1 18   4.2442     648
  3  1  1 18  0  0  0  4  1  1 11   4.2442     645
  4  1  1 11  0  0  0  3  1  1 18   4.2442     645
  3  1  1 11  0  1  0  4  2  1 18   4.2442     646
  3  1  1 18  0  0  0  4  2  1 11   4.2442     646
  4  1  1 11  0  0  0  3  2  1 18   4.2442     646
  3  2  1 18  0  0  0  4  1  1 11   4.2442     647
  4  2  1 11  0  0  0  3  1  1 18   4.2442     647
  4  2  1 18  0 -1  0  3  1  1 11   4.2442     647
  3  2  1 11  0  1  0  4  2  1 18   4.2442     648
  4  2  1 18  0 -1  0  3  2  1 11   4.2442     648
  3  1  1 11  0  1  0  4  1  1 18   4.2442     645
  4  1  1 18  0 -1  0  3  1  1 11   4.2442     645
  4  1  1 18  0 -1  0  3  2  1 11   4.2442     646
  3  2  1 11  0  1  0  4  1  1 18   4.2442     647
  1  1  1 22  2  0  1  3  2  1 27   4.2459     650
  2  1  1 22 -2  1  0  4  2  1 27   4.2459     650
  4  1  1 22  2 -1  0  2  2  1 27   4.2459     650
  2  2  1 27 -2  1  0  4  1  1 22   4.2459     651
  3  2  1 27 -2  0 -1  1  1  1 22   4.2459     651
  4  2  1 27  2 -1  0  2  1  1 22   4.2459     651
  1  2  1 22  2  0  1  3  2  1 27   4.2459     652
  2  2  1 22 -2  1  0  4  2  1 27   4.2459     652
  3  2  1 27 -2  0 -1  1  2  1 22   4.2459     652
  4  2  1 27  2 -1  0  2  2  1 22   4.2459     652
  1  2  1 27  2  0  1  3  2  1 22   4.2459     652
  2  2  1 27 -2  1  0  4  2  1 22   4.2459     652
  3  2  1 22 -2  0 -1  1  2  1 27   4.2459     652
  4  2  1 22  2 -1  0  2  2  1 27   4.2459     652
  3  1  1 22 -2  0 -1  1  2  1 27   4.2459     650
  1  2  1 27  2  0  1  3  1  1 22   4.2459     651
  1  1  1 10  1  0  1  3  1  1  6   4.2557     653
  2  1  1 10 -1  1  0  4  1  1  6   4.2557     653
  3  1  1  6 -1  0 -1  1  1  1 10   4.2557     653
  4  1  1  6  1 -1  0  2  1  1 10   4.2557     653
  2  1  1  6 -1  1  0  4  2  1 10   4.2557     654
  2  1  1 10 -1  1  0  4  2  1  6   4.2557     654
  3  1  1  6 -1  0 -1  1  2  1 10   4.2557     654
  4  1  1  6  1 -1  0  2  2  1 10   4.2557     654
  4  1  1 10  1 -1  0  2  2  1  6   4.2557     654
  1  2  1 10  1  0  1  3  1  1  6   4.2557     655
  2  2  1  6 -1  1  0  4  1  1 10   4.2557     655
  2  2  1 10 -1  1  0  4  1  1  6   4.2557     655
  4  2  1  6  1 -1  0  2  1  1 10   4.2557     655
  4  2  1 10  1 -1  0  2  1  1  6   4.2557     655
  2  2  1  6 -1  1  0  4  2  1 10   4.2557     656
  2  2  1 10 -1  1  0  4  2  1  6   4.2557     656
  4  2  1  6  1 -1  0  2  2  1 10   4.2557     656
  4  2  1 10  1 -1  0  2  2  1  6   4.2557     656
  1  1  1  6  1  0  1  3  1  1 10   4.2557     653
  2  1  1  6 -1  1  0  4  1  1 10   4.2557     653
  3  1  1 10 -1  0 -1  1  1  1  6   4.2557     653
  4  1  1 10  1 -1  0  2  1  1  6   4.2557     653
  1  1  1  6  1  0  1  3  2  1 10   4.2557     654
  1  1  1 10  1  0  1  3  2  1  6   4.2557     654
  3  1  1 10 -1  0 -1  1  2  1  6   4.2557     654
  1  2  1  6  1  0  1  3  1  1 10   4.2557     655
  3  2  1  6 -1  0 -1  1  1  1 10   4.2557     655
  3  2  1 10 -1  0 -1  1  1  1  6   4.2557     655
  1  2  1  6  1  0  1  3  2  1 10   4.2557     656
  1  2  1 10  1  0  1  3  2  1  6   4.2557     656
  3  2  1  6 -1  0 -1  1  2  1 10   4.2557     656
  3  2  1 10 -1  0 -1  1  2  1  6   4.2557     656
  1  1  1 25  1 -1  1  3  1  1 20   4.2607     653
  2  1  1 25 -1  0  0  4  1  1 20   4.2607     653
  3  1  1 20 -1  1 -1  1  1  1 25   4.2607     653
  4  1  1 20  1  0  0  2  1  1 25   4.2607     653
  1  1  1 20  1 -1  1  3  2  1 25   4.2607     654
  3  2  1 25 -1  1 -1  1  1  1 20   4.2607     655
  1  1  1 20  1 -1  1  3  1  1 25   4.2607     657
  2  1  1 20 -1  0  0  4  1  1 25   4.2607     657
  3  1  1 25 -1  1 -1  1  1  1 20   4.2607     657
  4  1  1 25  1  0  0  2  1  1 20   4.2607     657
  3  1  1 20 -1  1 -1  1  2  1 25   4.2607     658
  4  1  1 20  1  0  0  2  2  1 25   4.2607     658
  1  2  1 25  1 -1  1  3  1  1 20   4.2607     659
  2  2  1 25 -1  0  0  4  1  1 20   4.2607     659
  2  1  1 20 -1  0  0  4  2  1 25   4.2607     658
  4  2  1 25  1  0  0  2  1  1 20   4.2607     659
  2  1  1  7 -1  0  0  3  1  1 17   4.2613     657
  3  1  1 17  1  0  0  2  1  1  7   4.2613     657
  3  1  1 17  1  0  0  2  2  1  7   4.2613     658
  2  2  1  7 -1  0  0  3  1  1 17   4.2613     659
  1  1  1  7  1  0  1  4  1  1 17   4.2613     657
  1  1  1 17 -1  0  0  4  1  1  7   4.2613     657
  2  1  1 17  1  0  1  3  1  1  7   4.2613     657
  4  1  1  7  1  0  0  1  1  1 17   4.2613     657
  4  1  1 17 -1  0 -1  1  1  1  7   4.2613     657
  1  1  1  7  1  0  1  4  2  1 17   4.2613     658
  2  1  1  7 -1  0  0  3  2  1 17   4.2613     658
  2  1  1 17  1  0  1  3  2  1  7   4.2613     658
  3  1  1  7 -1  0 -1  2  2  1 17   4.2613     658
  4  1  1  7  1  0  0  1  2  1 17   4.2613     658
  4  1  1 17 -1  0 -1  1  2  1  7   4.2613     658
  1  2  1  7  1  0  1  4  1  1 17   4.2613     659
  1  2  1 17 -1  0  0  4  1  1  7   4.2613     659
[truncated: 2,116,042 more chars]
