# Supplementary material for: A Process for Modelling Diffuse Scattering from Disordered Molecular Crystals, Illustrated by Application to Monoclinic 9-Chloro-10-methylanthracene
Source: Hindawi journal article supplement (doi:10.1155/2015/878463), 2015-01-01
Supplement: f2 [file 878463.f2.zip › 878463.f2/CMA_simulations/CMA_contacts_grouped_trimmed]

 ol	oz	om	oat	da	db	dc	dl	dz	dm	dat	length	type                                                     
  4  1  1 24  0  0  0  1  2  1 27 2.2826     2
  1  2  1 27  0  0  0  4  1  1 24 2.2826     3
  1  2  1 27  0  0  0  4  2  1 24 2.2826     4
  2  2  1 27  0  0  1  3  2  1 24 2.2826     4
  3  2  1 24  0  0 -1  2  2  1 27 2.2826     4
  4  2  1 24  0  0  0  1  2  1 27 2.2826     4
  1  1  1 24  0  0  1  4  2  1 27 2.2826     2
  3  1  1 24  0  0 -1  2  2  1 27 2.2826     2
  2  2  1 27  0  0  1  3  1  1 24 2.2826     3
  4  2  1 27  0  0 -1  1  1  1 24 2.2826     3
  1  2  1 24  0  0  1  4  2  1 27 2.2826     4
  4  2  1 27  0  0 -1  1  2  1 24 2.2826     4
  2  1  1 24  0  0  0  3  2  1 27 2.2826     2
  3  2  1 27  0  0  0  2  1  1 24 2.2826     3
  2  2  1 24  0  0  0  3  2  1 27 2.2826     4
  3  2  1 27  0  0  0  2  2  1 24 2.2826     4
  1  1  1 28  1  0  1  3  2  1 26 2.2964     6
  3  2  1 26 -1  0 -1  1  1  1 28 2.2964     7
  4  2  1 26  1 -1  0  2  1  1 28 2.2964     7
  2  1  1 28 -1  1  0  4  2  1 26 2.2964     6
  3  1  1 28 -1  0 -1  1  2  1 26 2.2964     6
  1  2  1 26  1  0  1  3  1  1 28 2.2964     7
  4  1  1 28  1 -1  0  2  2  1 26 2.2964     6
  2  2  1 26 -1  1  0  4  1  1 28 2.2964     7
  4  1  1 22  2 -1  0  2  2  1 22 2.3824    10
  2  2  1 22 -2  1  0  4  1  1 22 2.3824    11
  1  1  1 22  2  0  1  3  1  1 22 2.3824     9
  2  1  1 22 -2  1  0  4  1  1 22 2.3824     9
  3  1  1 22 -2  0 -1  1  1  1 22 2.3824     9
  4  1  1 22  2 -1  0  2  1  1 22 2.3824     9
  1  1  1 22  2  0  1  3  2  1 22 2.3824    10
  3  1  1 22 -2  0 -1  1  2  1 22 2.3824    10
  1  2  1 22  2  0  1  3  1  1 22 2.3824    11
  3  2  1 22 -2  0 -1  1  1  1 22 2.3824    11
  1  2  1 22  2  0  1  3  2  1 22 2.3824    12
  3  2  1 22 -2  0 -1  1  2  1 22 2.3824    12
  2  1  1 22 -2  1  0  4  2  1 22 2.3824    10
  4  2  1 22  2 -1  0  2  1  1 22 2.3824    11
  2  2  1 22 -2  1  0  4  2  1 22 2.3824    12
  4  2  1 22  2 -1  0  2  2  1 22 2.3824    12
  1  1  1 23  2  0  1  3  2  1 26 2.4245    14
  2  1  1 23 -2  1  0  4  2  1 26 2.4245    14
  3  1  1 23 -2  0 -1  1  2  1 26 2.4245    14
  1  2  1 26  2  0  1  3  1  1 23 2.4245    15
  3  2  1 26 -2  0 -1  1  1  1 23 2.4245    15
  4  2  1 26  2 -1  0  2  1  1 23 2.4245    15
  1  2  1 23  2  0  1  3  2  1 26 2.4245    16
  2  2  1 23 -2  1  0  4  2  1 26 2.4245    16
  3  2  1 26 -2  0 -1  1  2  1 23 2.4245    16
  4  2  1 26  2 -1  0  2  2  1 23 2.4245    16
  4  1  1 23  2 -1  0  2  2  1 26 2.4245    14
  2  2  1 26 -2  1  0  4  1  1 23 2.4245    15
  1  2  1 26  2  0  1  3  2  1 23 2.4245    16
  3  2  1 23 -2  0 -1  1  2  1 26 2.4245    16
  2  2  1 26 -2  1  0  4  2  1 23 2.4246    16
  4  2  1 23  2 -1  0  2  2  1 26 2.4246    16
  2  1  1 24 -1  0  0  3  1  1 17 2.5025    17
  3  1  1 17  1  0  0  2  1  1 24 2.5025    17
  3  1  1 24 -1  0 -1  2  2  1 17 2.5025    18
  2  2  1 17  1  0  1  3  1  1 24 2.5025    19
  1  1  1 24  1  0  1  4  1  1 17 2.5025    17
  2  1  1 17  1  0  1  3  1  1 24 2.5025    17
  3  1  1 24 -1  0 -1  2  1  1 17 2.5025    17
  4  1  1 17 -1  0 -1  1  1  1 24 2.5025    17
  1  1  1 24  1  0  1  4  2  1 17 2.5025    18
  2  1  1 17  1  0  1  3  2  1 24 2.5025    18
  2  1  1 24 -1  0  0  3  2  1 17 2.5025    18
  3  1  1 17  1  0  0  2  2  1 24 2.5025    18
  2  2  1 24 -1  0  0  3  1  1 17 2.5025    19
  3  2  1 17  1  0  0  2  1  1 24 2.5025    19
  3  2  1 24 -1  0 -1  2  1  1 17 2.5025    19
  4  2  1 17 -1  0 -1  1  1  1 24 2.5025    19
  1  2  1 24  1  0  1  4  2  1 17 2.5025    20
  2  2  1 17  1  0  1  3  2  1 24 2.5025    20
  2  2  1 24 -1  0  0  3  2  1 17 2.5025    20
  3  2  1 17  1  0  0  2  2  1 24 2.5025    20
  3  2  1 24 -1  0 -1  2  2  1 17 2.5025    20
  4  2  1 17 -1  0 -1  1  2  1 24 2.5025    20
  1  1  1 17 -1  0  0  4  1  1 24 2.5025    17
  4  1  1 24  1  0  0  1  1  1 17 2.5025    17
  4  1  1 17 -1  0 -1  1  2  1 24 2.5025    18
  4  1  1 24  1  0  0  1  2  1 17 2.5025    18
  1  2  1 17 -1  0  0  4  1  1 24 2.5025    19
  1  2  1 24  1  0  1  4  1  1 17 2.5025    19
  1  1  1 17 -1  0  0  4  2  1 24 2.5025    18
  4  2  1 24  1  0  0  1  1  1 17 2.5025    19
  1  2  1 17 -1  0  0  4  2  1 24 2.5025    20
  4  2  1 24  1  0  0  1  2  1 17 2.5025    20
  3  1  1 17  0  0  0  4  1  1 26 2.5119    21
  4  1  1 26  0  0  0  3  1  1 17 2.5119    21
  4  1  1 26  0  0  0  3  2  1 17 2.5119    22
  3  2  1 17  0  0  0  4  1  1 26 2.5119    23
  1  1  1 26  0 -1  0  2  1  1 17 2.5119    21
  2  1  1 17  0  1  0  1  1  1 26 2.5119    21
  3  1  1 26  0  1  0  4  2  1 17 2.5119    22
  4  2  1 17  0 -1  0  3  1  1 26 2.5119    23
  1  1  1 17  0  0  0  2  1  1 26 2.5119    21
  2  1  1 26  0  0  0  1  1  1 17 2.5119    21
  3  1  1 26  0  1  0  4  1  1 17 2.5119    21
  4  1  1 17  0 -1  0  3  1  1 26 2.5119    21
  1  1  1 26  0 -1  0  2  2  1 17 2.5119    22
  2  1  1 26  0  0  0  1  2  1 17 2.5119    22
  1  2  1 17  0  0  0  2  1  1 26 2.5119    23
  2  2  1 17  0  1  0  1  1  1 26 2.5119    23
  1  1  1 18  0  0  0  2  1  1 26 2.6028    25
  2  1  1 26  0  0  0  1  1  1 18 2.6028    25
  3  1  1 18  0  0  0  4  1  1 26 2.6028    25
  4  1  1 26  0  0  0  3  1  1 18 2.6028    25
  1  1  1 26  0 -1  0  2  2  1 18 2.6028    26
  2  1  1 26  0  0  0  1  2  1 18 2.6028    26
  1  2  1 18  0  0  0  2  1  1 26 2.6028    27
  2  2  1 18  0  1  0  1  1  1 26 2.6028    27
  1  1  1 26  0 -1  0  2  1  1 18 2.6028    25
  2  1  1 18  0  1  0  1  1  1 26 2.6028    25
  3  1  1 26  0  1  0  4  2  1 18 2.6028    26
  4  1  1 26  0  0  0  3  2  1 18 2.6028    26
  3  2  1 18  0  0  0  4  1  1 26 2.6028    27
  4  2  1 18  0 -1  0  3  1  1 26 2.6028    27
  3  1  1 26  0  1  0  4  1  1 18 2.6028    25
  4  1  1 18  0 -1  0  3  1  1 26 2.6028    25
  1  1  1 17 -1  0  0  1  2  1 27 2.6062    26
  2  1  1 17  1  0  0  2  2  1 27 2.6062    26
  1  2  1 27  1  0  0  1  1  1 17 2.6062    27
  2  2  1 27 -1  0  0  2  1  1 17 2.6062    27
  1  2  1 17 -1  0  0  1  2  1 27 2.6062    28
  1  2  1 27  1  0  0  1  2  1 17 2.6062    28
  2  2  1 17  1  0  0  2  2  1 27 2.6062    28
  2  2  1 27 -1  0  0  2  2  1 17 2.6062    28
  4  2  1 17 -1  0  0  4  2  1 27 2.6062    28
  4  2  1 27  1  0  0  4  2  1 17 2.6062    28
  3  1  1 17  1  0  0  3  2  1 27 2.6063    26
  3  2  1 27 -1  0  0  3  1  1 17 2.6063    27
  3  2  1 17  1  0  0  3  2  1 27 2.6063    28
  3  2  1 27 -1  0  0  3  2  1 17 2.6063    28
  4  1  1 17 -1  0  0  4  2  1 27 2.6063    26
  4  2  1 27  1  0  0  4  1  1 17 2.6063    27
  3  1  1 17  0  0  0  4  1  1 27 2.6336    29
  4  1  1 27  0  0  0  3  1  1 17 2.6336    29
  3  1  1 27  0  1  0  4  2  1 17 2.6336    30
  4  2  1 17  0 -1  0  3  1  1 27 2.6336    31
  1  1  1 17  0  0  0  2  1  1 27 2.6337    29
  1  1  1 27  0 -1  0  2  1  1 17 2.6337    29
  2  1  1 17  0  1  0  1  1  1 27 2.6337    29
  2  1  1 27  0  0  0  1  1  1 17 2.6337    29
  3  1  1 27  0  1  0  4  1  1 17 2.6337    29
  4  1  1 17  0 -1  0  3  1  1 27 2.6337    29
  1  1  1 27  0 -1  0  2  2  1 17 2.6337    30
  2  1  1 27  0  0  0  1  2  1 17 2.6337    30
  4  1  1 27  0  0  0  3  2  1 17 2.6337    30
  1  2  1 17  0  0  0  2  1  1 27 2.6337    31
  2  2  1 17  0  1  0  1  1  1 27 2.6337    31
  3  2  1 17  0  0  0  4  1  1 27 2.6337    31
  2  1  1 24 -1  0  0  4  1  1 27 2.6561    33
  4  1  1 27  1  0  0  2  1  1 24 2.6561    33
  1  1  1 24  1 -1  1  3  1  1 27 2.6561    33
  1  1  1 27  1 -1  1  3  1  1 24 2.6561    33
  3  1  1 24 -1  1 -1  1  1  1 27 2.6561    33
  3  1  1 27 -1  1 -1  1  1  1 24 2.6561    33
  1  1  1 27  1 -1  1  3  2  1 24 2.6561    34
  3  1  1 27 -1  1 -1  1  2  1 24 2.6561    34
  4  1  1 27  1  0  0  2  2  1 24 2.6561    34
  1  2  1 24  1 -1  1  3  1  1 27 2.6561    35
  2  2  1 24 -1  0  0  4  1  1 27 2.6561    35
  3  2  1 24 -1  1 -1  1  1  1 27 2.6561    35
  2  1  1 27 -1  0  0  4  1  1 24 2.6561    33
  4  1  1 24  1  0  0  2  1  1 27 2.6561    33
  2  1  1 27 -1  0  0  4  2  1 24 2.6561    34
  4  2  1 24  1  0  0  2  1  1 27 2.6561    35
  2  1  1 23 -1  0  0  2  1  1 28 2.6748    37
  2  1  1 28  1  0  0  2  1  1 23 2.6748    37
  3  1  1 23 -1  0  0  3  1  1 28 2.6748    37
  3  1  1 28  1  0  0  3  1  1 23 2.6748    37
  1  1  1 23  1  0  0  1  1  1 28 2.6748    37
  1  1  1 28 -1  0  0  1  1  1 23 2.6748    37
  1  1  1 28 -1  0  0  1  2  1 23 2.6748    38
  2  1  1 28  1  0  0  2  2  1 23 2.6748    38
  1  2  1 23  1  0  0  1  1  1 28 2.6748    39
  2  2  1 23 -1  0  0  2  1  1 28 2.6748    39
  3  1  1 28  1  0  0  3  2  1 23 2.6748    38
  3  2  1 23 -1  0  0  3  1  1 28 2.6748    39
  4  1  1 23  1  0  0  4  1  1 28 2.6749    37
  4  1  1 28 -1  0  0  4  1  1 23 2.6749    37
  4  1  1 28 -1  0  0  4  2  1 23 2.6749    38
  4  2  1 23  1  0  0  4  1  1 28 2.6749    39
  1  1  1 23  1  0  1  4  1  1 17 2.6772    37
  2  1  1 23 -1  0  0  3  1  1 17 2.6772    37
  3  1  1 17  1  0  0  2  1  1 23 2.6772    37
  4  1  1 17 -1  0 -1  1  1  1 23 2.6772    37
  2  1  1 23 -1  0  0  3  2  1 17 2.6772    38
  4  1  1 17 -1  0 -1  1  2  1 23 2.6772    38
  1  2  1 23  1  0  1  4  1  1 17 2.6772    39
  3  2  1 17  1  0  0  2  1  1 23 2.6772    39
  1  1  1 17 -1  0  0  4  2  1 23 2.6773    38
  3  1  1 17  1  0  0  2  2  1 23 2.6773    38
  3  1  1 23 -1  0 -1  2  2  1 17 2.6773    38
  2  2  1 17  1  0  1  3  1  1 23 2.6773    39
  2  2  1 23 -1  0  0  3  1  1 17 2.6773    39
  4  2  1 23  1  0  0  1  1  1 17 2.6773    39
  1  2  1 17 -1  0  0  4  2  1 23 2.6773    40
  2  2  1 17  1  0  1  3  2  1 23 2.6773    40
  2  2  1 23 -1  0  0  3  2  1 17 2.6773    40
  3  2  1 17  1  0  0  2  2  1 23 2.6773    40
  3  2  1 23 -1  0 -1  2  2  1 17 2.6773    40
  4  2  1 23  1  0  0  1  2  1 17 2.6773    40
  1  1  1 17 -1  0  0  4  1  1 23 2.6773    37
  2  1  1 17  1  0  1  3  1  1 23 2.6773    37
  3  1  1 23 -1  0 -1  2  1  1 17 2.6773    37
  4  1  1 23  1  0  0  1  1  1 17 2.6773    37
  1  1  1 23  1  0  1  4  2  1 17 2.6773    38
  2  1  1 17  1  0  1  3  2  1 23 2.6773    38
  4  1  1 23  1  0  0  1  2  1 17 2.6773    38
  1  2  1 17 -1  0  0  4  1  1 23 2.6773    39
  3  2  1 23 -1  0 -1  2  1  1 17 2.6773    39
  4  2  1 17 -1  0 -1  1  1  1 23 2.6773    39
  1  2  1 23  1  0  1  4  2  1 17 2.6773    40
  4  2  1 17 -1  0 -1  1  2  1 23 2.6773    40
  1  1  1 28  1  0  1  3  2  1 28 2.6877    42
  2  1  1 28 -1  1  0  4  2  1 28 2.6877    42
  3  2  1 28 -1  0 -1  1  1  1 28 2.6877    43
  4  2  1 28  1 -1  0  2  1  1 28 2.6877    43
  3  1  1 28 -1  0 -1  1  2  1 28 2.6877    42
  1  2  1 28  1  0  1  3  1  1 28 2.6877    43
  4  1  1 28  1 -1  0  2  2  1 28 2.6877    42
  2  2  1 28 -1  1  0  4  1  1 28 2.6877    43
  1  1  1  9  1 -1  0  2  1  1 19 2.7816    45
  2  1  1 19 -1  1  0  1  1  1  9 2.7816    45
  3  1  1  9 -1  1  0  4  1  1 19 2.7816    45
  3  1  1 19 -1  0  0  4  1  1  9 2.7816    45
  4  1  1  9  1  0  0  3  1  1 19 2.7816    45
  4  1  1 19  1 -1  0  3  1  1  9 2.7816    45
  2  1  1 19 -1  1  0  1  2  1  9 2.7816    46
  3  1  1  9 -1  1  0  4  2  1 19 2.7816    46
  4  1  1  9  1  0  0  3  2  1 19 2.7816    46
  4  1  1 19  1 -1  0  3  2  1  9 2.7816    46
  1  2  1  9  1 -1  0  2  1  1 19 2.7816    47
  3  2  1  9 -1  1  0  4  1  1 19 2.7816    47
  3  2  1 19 -1  0  0  4  1  1  9 2.7816    47
  4  2  1 19  1 -1  0  3  1  1  9 2.7816    47
  3  2  1  9 -1  1  0  4  2  1 19 2.7816    48
  4  2  1 19  1 -1  0  3  2  1  9 2.7816    48
  1  1  1 19  1  0  0  2  1  1  9 2.7816    45
  2  1  1  9 -1  0  0  1  1  1 19 2.7816    45
  1  1  1  9  1 -1  0  2  2  1 19 2.7816    46
  1  1  1 19  1  0  0  2  2  1  9 2.7816    46
  2  1  1  9 -1  0  0  1  2  1 19 2.7816    46
  3  1  1 19 -1  0  0  4  2  1  9 2.7816    46
  1  2  1 19  1  0  0  2  1  1  9 2.7816    47
  2  2  1  9 -1  0  0  1  1  1 19 2.7816    47
  2  2  1 19 -1  1  0  1  1  1  9 2.7816    47
  4  2  1  9  1  0  0  3  1  1 19 2.7816    47
  1  2  1  9  1 -1  0  2  2  1 19 2.7816    48
  1  2  1 19  1  0  0  2  2  1  9 2.7816    48
  2  2  1  9 -1  0  0  1  2  1 19 2.7816    48
  2  2  1 19 -1  1  0  1  2  1  9 2.7816    48
  3  2  1 19 -1  0  0  4  2  1  9 2.7816    48
  4  2  1  9  1  0  0  3  2  1 19 2.7816    48
  3  1  1 14  0  0  0  2  2  1 25 2.8326    50
  2  2  1 25  0  0  0  3  1  1 14 2.8326    51
  1  1  1 14  0  0  0  4  1  1 25 2.8326    49
  1  1  1 25  0  0  1  4  1  1 14 2.8326    49
  2  1  1 25  0  0  0  3  1  1 14 2.8326    49
  3  1  1 14  0  0  0  2  1  1 25 2.8326    49
  4  1  1 14  0  0 -1  1  1  1 25 2.8326    49
  4  1  1 25  0  0  0  1  1  1 14 2.8326    49
  1  1  1 14  0  0  0  4  2  1 25 2.8326    50
  2  1  1 14  0  0  1  3  2  1 25 2.8326    50
  4  1  1 14  0  0 -1  1  2  1 25 2.8326    50
  4  1  1 25  0  0  0  1  2  1 14 2.8326    50
  1  2  1 14  0  0  0  4  1  1 25 2.8326    51
  1  2  1 25  0  0  1  4  1  1 14 2.8326    51
  3  2  1 25  0  0 -1  2  1  1 14 2.8326    51
  4  2  1 25  0  0  0  1  1  1 14 2.8326    51
  1  2  1 14  0  0  0  4  2  1 25 2.8326    52
  2  2  1 14  0  0  1  3  2  1 25 2.8326    52
  2  2  1 25  0  0  0  3  2  1 14 2.8326    52
  3  2  1 14  0  0  0  2  2  1 25 2.8326    52
  3  2  1 25  0  0 -1  2  2  1 14 2.8326    52
  4  2  1 25  0  0  0  1  2  1 14 2.8326    52
  2  1  1 14  0  0  1  3  1  1 25 2.8326    49
  3  1  1 25  0  0 -1  2  1  1 14 2.8326    49
  1  1  1 25  0  0  1  4  2  1 14 2.8326    50
  2  1  1 25  0  0  0  3  2  1 14 2.8326    50
  3  1  1 25  0  0 -1  2  2  1 14 2.8326    50
  2  2  1 14  0  0  1  3  1  1 25 2.8326    51
  3  2  1 14  0  0  0  2  1  1 25 2.8326    51
  4  2  1 14  0  0 -1  1  1  1 25 2.8326    51
  1  2  1 25  0  0  1  4  2  1 14 2.8326    52
  4  2  1 14  0  0 -1  1  2  1 25 2.8326    52
  1  1  1 16 -1  0  0  4  1  1 23 2.8424    53
  1  1  1 23  1  0  1  4  1  1 16 2.8424    53
  4  1  1 16 -1  0 -1  1  1  1 23 2.8424    53
  4  1  1 23  1  0  0  1  1  1 16 2.8424    53
  1  1  1 16 -1  0  0  4  2  1 23 2.8424    54
  2  1  1 23 -1  0  0  3  2  1 16 2.8424    54
  3  1  1 16  1  0  0  2  2  1 23 2.8424    54
  4  1  1 16 -1  0 -1  1  2  1 23 2.8424    54
  4  1  1 23  1  0  0  1  2  1 16 2.8424    54
  1  2  1 16 -1  0  0  4  1  1 23 2.8424    55
  1  2  1 23  1  0  1  4  1  1 16 2.8424    55
  2  2  1 23 -1  0  0  3  1  1 16 2.8424    55
  3  2  1 16  1  0  0  2  1  1 23 2.8424    55
  4  2  1 23  1  0  0  1  1  1 16 2.8424    55
  1  2  1 16 -1  0  0  4  2  1 23 2.8424    56
  2  2  1 23 -1  0  0  3  2  1 16 2.8424    56
  3  2  1 16  1  0  0  2  2  1 23 2.8424    56
  4  2  1 23  1  0  0  1  2  1 16 2.8424    56
  2  1  1 23 -1  0  0  3  1  1 16 2.8424    53
  3  1  1 16  1  0  0  2  1  1 23 2.8424    53
  1  1  1 23  1  0  1  4  2  1 16 2.8424    54
  2  1  1 16  1  0  1  3  2  1 23 2.8424    54
  3  2  1 23 -1  0 -1  2  1  1 16 2.8424    55
  4  2  1 16 -1  0 -1  1  1  1 23 2.8424    55
  1  2  1 23  1  0  1  4  2  1 16 2.8424    56
  2  2  1 16  1  0  1  3  2  1 23 2.8424    56
  3  2  1 23 -1  0 -1  2  2  1 16 2.8424    56
  4  2  1 16 -1  0 -1  1  2  1 23 2.8424    56
  2  1  1 16  1  0  1  3  1  1 23 2.8424    53
  3  1  1 23 -1  0 -1  2  1  1 16 2.8424    53
  3  1  1 23 -1  0 -1  2  2  1 16 2.8424    54
  2  2  1 16  1  0  1  3  1  1 23 2.8424    55
  1  1  1  8  1 -1  0  2  1  1 19 2.8689    57
  1  1  1 19  1  0  0  2  1  1  8 2.8689    57
  2  1  1  8 -1  0  0  1  1  1 19 2.8689    57
  2  1  1 19 -1  1  0  1  1  1  8 2.8689    57
  3  1  1  8 -1  1  0  4  1  1 19 2.8689    57
  3  1  1 19 -1  0  0  4  1  1  8 2.8689    57
  4  1  1  8  1  0  0  3  1  1 19 2.8689    57
  4  1  1 19  1 -1  0  3  1  1  8 2.8689    57
  2  1  1  8 -1  0  0  1  2  1 19 2.8689    58
  2  1  1 19 -1  1  0  1  2  1  8 2.8689    58
  3  1  1  8 -1  1  0  4  2  1 19 2.8689    58
  1  2  1  8  1 -1  0  2  1  1 19 2.8689    59
  1  2  1 19  1  0  0  2  1  1  8 2.8689    59
  4  2  1 19  1 -1  0  3  1  1  8 2.8689    59
  1  1  1  8  1 -1  0  2  2  1 19 2.8689    58
  1  1  1 19  1  0  0  2  2  1  8 2.8689    58
  3  1  1 19 -1  0  0  4  2  1  8 2.8689    58
  4  1  1  8  1  0  0  3  2  1 19 2.8689    58
  4  1  1 19  1 -1  0  3  2  1  8 2.8689    58
  2  2  1  8 -1  0  0  1  1  1 19 2.8689    59
  2  2  1 19 -1  1  0  1  1  1  8 2.8689    59
  3  2  1  8 -1  1  0  4  1  1 19 2.8689    59
  3  2  1 19 -1  0  0  4  1  1  8 2.8689    59
  4  2  1  8  1  0  0  3  1  1 19 2.8689    59
  1  2  1  8  1 -1  0  2  2  1 19 2.8689    60
  1  2  1 19  1  0  0  2  2  1  8 2.8689    60
  2  2  1  8 -1  0  0  1  2  1 19 2.8689    60
  2  2  1 19 -1  1  0  1  2  1  8 2.8689    60
  3  2  1  8 -1  1  0  4  2  1 19 2.8689    60
  4  2  1 19  1 -1  0  3  2  1  8 2.8689    60
  3  2  1 19 -1  0  0  4  2  1  8 2.8689    60
  4  2  1  8  1  0  0  3  2  1 19 2.8689    60
  1  1  1 25  1  0  1  3  2  1 28 2.8808    62
  3  2  1 28 -1  0 -1  1  1  1 25 2.8808    63
  1  2  1 25  1  0  1  3  2  1 28 2.8808    64
  2  2  1 25 -1  1  0  4  2  1 28 2.8808    64
  2  2  1 28 -1  1  0  4  2  1 25 2.8808    64
  3  2  1 28 -1  0 -1  1  2  1 25 2.8808    64
  4  2  1 25  1 -1  0  2  2  1 28 2.8808    64
  4  2  1 28  1 -1  0  2  2  1 25 2.8808    64
  2  1  1 25 -1  1  0  4  2  1 28 2.8808    62
  3  1  1 25 -1  0 -1  1  2  1 28 2.8808    62
  4  1  1 25  1 -1  0  2  2  1 28 2.8808    62
  1  2  1 28  1  0  1  3  1  1 25 2.8808    63
  2  2  1 28 -1  1  0  4  1  1 25 2.8808    63
  4  2  1 28  1 -1  0  2  1  1 25 2.8808    63
  1  2  1 28  1  0  1  3  2  1 25 2.8808    64
  3  2  1 25 -1  0 -1  1  2  1 28 2.8808    64
  1  1  1 18  1  0  0  2  1  1  4 2.8975    65
  2  1  1  4 -1  0  0  1  1  1 18 2.8975    65
  3  1  1  4 -1  1  0  4  1  1 18 2.8975    65
  4  1  1 18  1 -1  0  3  1  1  4 2.8975    65
  2  1  1  4 -1  0  0  1  2  1 18 2.8975    66
  3  1  1  4 -1  1  0  4  2  1 18 2.8975    66
  1  2  1 18  1  0  0  2  1  1  4 2.8975    67
  4  2  1 18  1 -1  0  3  1  1  4 2.8975    67
  1  1  1  4  1 -1  0  2  1  1 18 2.8975    65
  2  1  1 18 -1  1  0  1  1  1  4 2.8975    65
  1  1  1  4  1 -1  0  2  2  1 18 2.8975    66
  1  1  1 18  1  0  0  2  2  1  4 2.8975    66
  2  1  1 18 -1  1  0  1  2  1  4 2.8975    66
  3  1  1 18 -1  0  0  4  2  1  4 2.8975    66
  1  2  1  4  1 -1  0  2  1  1 18 2.8975    67
  2  2  1  4 -1  0  0  1  1  1 18 2.8975    67
  2  2  1 18 -1  1  0  1  1  1  4 2.8975    67
  4  2  1  4  1  0  0  3  1  1 18 2.8975    67
  1  2  1  4  1 -1  0  2  2  1 18 2.8975    68
  1  2  1 18  1  0  0  2  2  1  4 2.8975    68
  2  2  1  4 -1  0  0  1  2  1 18 2.8975    68
  2  2  1 18 -1  1  0  1  2  1  4 2.8975    68
  3  2  1  4 -1  1  0  4  2  1 18 2.8975    68
  3  2  1 18 -1  0  0  4  2  1  4 2.8975    68
  4  2  1  4  1  0  0  3  2  1 18 2.8975    68
  4  2  1 18  1 -1  0  3  2  1  4 2.8975    68
  3  1  1 18 -1  0  0  4  1  1  4 2.8975    65
  4  1  1  4  1  0  0  3  1  1 18 2.8975    65
  4  1  1  4  1  0  0  3  2  1 18 2.8975    66
  4  1  1 18  1 -1  0  3  2  1  4 2.8975    66
  3  2  1  4 -1  1  0  4  1  1 18 2.8975    67
  3  2  1 18 -1  0  0  4  1  1  4 2.8975    67
  4  1  1 11  1  0  0  3  2  1 28 2.9460    70
  3  2  1 28 -1  0  0  4  1  1 11 2.9460    71
  1  1  1 11  1 -1  0  2  2  1 28 2.9460    70
  2  2  1 28 -1  1  0  1  1  1 11 2.9460    71
  1  2  1 11  1 -1  0  2  2  1 28 2.9460    72
  2  2  1 28 -1  1  0  1  2  1 11 2.9460    72
  3  2  1 11 -1  1  0  4  2  1 28 2.9460    72
  4  2  1 28  1 -1  0  3  2  1 11 2.9460    72
  2  1  1 11 -1  0  0  1  2  1 28 2.9460    70
  3  1  1 11 -1  1  0  4  2  1 28 2.9460    70
  1  2  1 28  1  0  0  2  1  1 11 2.9460    71
  4  2  1 28  1 -1  0  3  1  1 11 2.9460    71
  1  2  1 28  1  0  0  2  2  1 11 2.9460    72
  2  2  1 11 -1  0  0  1  2  1 28 2.9460    72
  3  2  1 28 -1  0  0  4  2  1 11 2.9460    72
  4  2  1 11  1  0  0  3  2  1 28 2.9460    72
  4  1  1 13  0  0 -1  1  1  1 25 2.9472    69
  1  1  1 13  0  0  0  4  2  1 25 2.9472    70
  4  1  1 13  0  0 -1  1  2  1 25 2.9472    70
  1  2  1 25  0  0  1  4  1  1 13 2.9472    71
  4  2  1 25  0  0  0  1  1  1 13 2.9472    71
  1  2  1 13  0  0  0  4  2  1 25 2.9472    72
  4  2  1 25  0  0  0  1  2  1 13 2.9472    72
  1  1  1 13  0  0  0  4  1  1 25 2.9472    69
  1  1  1 25  0  0  1  4  1  1 13 2.9472    69
  2  1  1 25  0  0  0  3  1  1 13 2.9472    69
  3  1  1 13  0  0  0  2  1  1 25 2.9472    69
  4  1  1 25  0  0  0  1  1  1 13 2.9472    69
  2  1  1 13  0  0  1  3  2  1 25 2.9472    70
  3  1  1 13  0  0  0  2  2  1 25 2.9472    70
  4  1  1 25  0  0  0  1  2  1 13 2.9472    70
  1  2  1 13  0  0  0  4  1  1 25 2.9472    71
  2  2  1 25  0  0  0  3  1  1 13 2.9472    71
  3  2  1 25  0  0 -1  2  1  1 13 2.9472    71
  2  2  1 25  0  0  0  3  2  1 13 2.9472    72
  3  2  1 13  0  0  0  2  2  1 25 2.9472    72
  2  1  1 13  0  0  1  3  1  1 25 2.9472    69
  3  1  1 25  0  0 -1  2  1  1 13 2.9472    69
  1  1  1 25  0  0  1  4  2  1 13 2.9472    70
  2  1  1 25  0  0  0  3  2  1 13 2.9472    70
  3  1  1 25  0  0 -1  2  2  1 13 2.9472    70
  2  2  1 13  0  0  1  3  1  1 25 2.9472    71
  3  2  1 13  0  0  0  2  1  1 25 2.9472    71
  4  2  1 13  0  0 -1  1  1  1 25 2.9472    71
  1  2  1 25  0  0  1  4  2  1 13 2.9472    72
  2  2  1 13  0  0  1  3  2  1 25 2.9472    72
  3  2  1 25  0  0 -1  2  2  1 13 2.9472    72
  4  2  1 13  0  0 -1  1  2  1 25 2.9472    72
  2  1  1  6 -1  0  0  4  1  1 27 2.9540    73
  4  1  1 27  1  0  0  2  1  1  6 2.9540    73
  1  1  1  6  1 -1  1  3  1  1 27 2.9540    73
  1  1  1 27  1 -1  1  3  1  1  6 2.9540    73
  3  1  1  6 -1  1 -1  1  1  1 27 2.9540    73
  3  1  1 27 -1  1 -1  1  1  1  6 2.9540    73
  1  1  1 27  1 -1  1  3  2  1  6 2.9540    74
  3  1  1 27 -1  1 -1  1  2  1  6 2.9540    74
  4  1  1 27  1  0  0  2  2  1  6 2.9540    74
  1  2  1  6  1 -1  1  3  1  1 27 2.9540    75
  2  2  1  6 -1  0  0  4  1  1 27 2.9540    75
  3  2  1  6 -1  1 -1  1  1  1 27 2.9540    75
  2  1  1 27 -1  0  0  4  1  1  6 2.9540    73
  4  1  1  6  1  0  0  2  1  1 27 2.9540    73
  2  1  1 27 -1  0  0  4  2  1  6 2.9540    74
  4  2  1  6  1  0  0  2  1  1 27 2.9540    75
  1  1  1 18  1  0  0  2  1  1  3 2.9612    77
  2  1  1  3 -1  0  0  1  1  1 18 2.9612    77
  3  1  1  3 -1  1  0  4  1  1 18 2.9612    77
  4  1  1 18  1 -1  0  3  1  1  3 2.9612    77
  2  1  1  3 -1  0  0  1  2  1 18 2.9612    78
  3  1  1  3 -1  1  0  4  2  1 18 2.9612    78
  1  2  1 18  1  0  0  2  1  1  3 2.9612    79
  4  2  1 18  1 -1  0  3  1  1  3 2.9612    79
  1  1  1  3  1 -1  0  2  1  1 18 2.9613    77
  2  1  1 18 -1  1  0  1  1  1  3 2.9613    77
  3  1  1 18 -1  0  0  4  1  1  3 2.9613    77
  4  1  1  3  1  0  0  3  1  1 18 2.9613    77
  1  1  1  3  1 -1  0  2  2  1 18 2.9613    78
  1  1  1 18  1  0  0  2  2  1  3 2.9613    78
  2  1  1 18 -1  1  0  1  2  1  3 2.9613    78
  3  1  1 18 -1  0  0  4  2  1  3 2.9613    78
  4  1  1  3  1  0  0  3  2  1 18 2.9613    78
  4  1  1 18  1 -1  0  3  2  1  3 2.9613    78
  1  2  1  3  1 -1  0  2  1  1 18 2.9613    79
  2  2  1  3 -1  0  0  1  1  1 18 2.9613    79
  2  2  1 18 -1  1  0  1  1  1  3 2.9613    79
  3  2  1  3 -1  1  0  4  1  1 18 2.9613    79
  3  2  1 18 -1  0  0  4  1  1  3 2.9613    79
  4  2  1  3  1  0  0  3  1  1 18 2.9613    79
  1  2  1  3  1 -1  0  2  2  1 18 2.9613    80
  1  2  1 18  1  0  0  2  2  1  3 2.9613    80
  2  2  1  3 -1  0  0  1  2  1 18 2.9613    80
  2  2  1 18 -1  1  0  1  2  1  3 2.9613    80
  3  2  1  3 -1  1  0  4  2  1 18 2.9613    80
  3  2  1 18 -1  0  0  4  2  1  3 2.9613    80
  4  2  1  3  1  0  0  3  2  1 18 2.9613    80
  4  2  1 18  1 -1  0  3  2  1  3 2.9613    80
  1  1  1 21  0  0  0  4  1  1 24 2.9715    81
  2  1  1 24  0  0  0  3  1  1 21 2.9715    81
  3  1  1 21  0  0  0  2  1  1 24 2.9715    81
  4  1  1 24  0  0  0  1  1  1 21 2.9715    81
  1  1  1 21  0  0  0  4  2  1 24 2.9715    82
  2  1  1 21  0  0  1  3  2  1 24 2.9715    82
  3  1  1 21  0  0  0  2  2  1 24 2.9715    82
  2  2  1 24  0  0  0  3  1  1 21 2.9715    83
  3  2  1 24  0  0 -1  2  1  1 21 2.9715    83
  4  2  1 24  0  0  0  1  1  1 21 2.9715    83
  2  1  1 21  0  0  1  3  1  1 24 2.9715    81
  3  1  1 24  0  0 -1  2  1  1 21 2.9715    81
  1  1  1 24  0  0  1  4  1  1 21 2.9715    81
  4  1  1 21  0  0 -1  1  1  1 24 2.9715    81
  4  1  1 21  0  0 -1  1  2  1 24 2.9715    82
  1  2  1 24  0  0  1  4  1  1 21 2.9715    83
  4  1  1 24  0  0  0  1  2  1 21 2.9869    86
  1  2  1 21  0  0  0  4  1  1 24 2.9869    87
  1  2  1 21  0  0  0  4  2  1 24 2.9869    88
  4  2  1 24  0  0  0  1  2  1 21 2.9869    88
  2  2  1 21  0  0  1  3  2  1 24 2.9869    88
  3  2  1 24  0  0 -1  2  2  1 21 2.9869    88
  1  1  1 24  0  0  1  4  2  1 21 2.9869    86
  2  1  1 24  0  0  0  3  2  1 21 2.9869    86
  3  1  1 24  0  0 -1  2  2  1 21 2.9869    86
  2  2  1 21  0  0  1  3  1  1 24 2.9869    87
  3  2  1 21  0  0  0  2  1  1 24 2.9869    87
  4  2  1 21  0  0 -1  1  1  1 24 2.9869    87
  1  2  1 24  0  0  1  4  2  1 21 2.9869    88
  2  2  1 24  0  0  0  3  2  1 21 2.9869    88
  3  2  1 21  0  0  0  2  2  1 24 2.9869    88
  4  2  1 21  0  0 -1  1  2  1 24 2.9869    88
  1  1  1 10  1 -1  0  2  2  1 28 3.0044    90
  4  1  1 10  1  0  0  3  2  1 28 3.0044    90
  1  2  1 28  1  0  0  2  1  1 10 3.0044    91
  2  2  1 28 -1  1  0  1  1  1 10 3.0044    91
  3  2  1 28 -1  0  0  4  1  1 10 3.0044    91
  1  2  1 10  1 -1  0  2  2  1 28 3.0044    92
  2  2  1 28 -1  1  0  1  2  1 10 3.0044    92
  2  1  1 10 -1  0  0  1  2  1 28 3.0044    90
  3  1  1 10 -1  1  0  4  2  1 28 3.0044    90
  4  2  1 28  1 -1  0  3  1  1 10 3.0044    91
  1  2  1 28  1  0  0  2  2  1 10 3.0044    92
  2  2  1 10 -1  0  0  1  2  1 28 3.0044    92
  3  2  1 10 -1  1  0  4  2  1 28 3.0044    92
  3  2  1 28 -1  0  0  4  2  1 10 3.0044    92
  4  2  1 10  1  0  0  3  2  1 28 3.0044    92
  4  2  1 28  1 -1  0  3  2  1 10 3.0044    92
  3  2  1 20  0  1  0  4  2  1 17 3.0121    96
  4  2  1 17  0 -1  0  3  2  1 20 3.0121    96
  2  1  1 17  0  1  0  1  2  1 20 3.0121    94
  3  1  1 17  0  0  0  4  2  1 20 3.0121    94
  4  1  1 17  0 -1  0  3  2  1 20 3.0121    94
  1  2  1 20  0 -1  0  2  1  1 17 3.0121    95
  3  2  1 20  0  1  0  4  1  1 17 3.0121    95
  4  2  1 20  0  0  0  3  1  1 17 3.0121    95
  1  2  1 20  0 -1  0  2  2  1 17 3.0121    96
  2  2  1 17  0  1  0  1  2  1 20 3.0121    96
  3  2  1 17  0  0  0  4  2  1 20 3.0121    96
  4  2  1 20  0  0  0  3  2  1 17 3.0121    96
  1  1  1 17  0  0  0  2  2  1 20 3.0121    94
  2  2  1 20  0  0  0  1  1  1 17 3.0121    95
  1  2  1 17  0  0  0  2  2  1 20 3.0121    96
  2  2  1 20  0  0  0  1  2  1 17 3.0121    96
  2  1  1 17  0  1  0  1  1  1 20 3.0397    97
  3  1  1 17  0  0  0  4  1  1 20 3.0397    97
  4  1  1 20  0  0  0  3  1  1 17 3.0397    97
  3  1  1 20  0  1  0  4  2  1 17 3.0397    98
  4  1  1 20  0  0  0  3  2  1 17 3.0397    98
  3  2  1 17  0  0  0  4  1  1 20 3.0397    99
  4  2  1 17  0 -1  0  3  1  1 20 3.0397    99
  1  1  1 17  0  0  0  2  1  1 20 3.0397    97
  1  1  1 20  0 -1  0  2  1  1 17 3.0397    97
  2  1  1 20  0  0  0  1  1  1 17 3.0397    97
  3  1  1 20  0  1  0  4  1  1 17 3.0397    97
  4  1  1 17  0 -1  0  3  1  1 20 3.0397    97
  1  1  1 20  0 -1  0  2  2  1 17 3.0397    98
  2  1  1 20  0  0  0  1  2  1 17 3.0397    98
  1  2  1 17  0  0  0  2  1  1 20 3.0397    99
  2  2  1 17  0  1  0  1  1  1 20 3.0397    99
  1  1  1 18  1  0  0  2  1  1  5 3.0406    97
  2  1  1  5 -1  0  0  1  1  1 18 3.0406    97
  3  1  1  5 -1  1  0  4  1  1 18 3.0406    97
  4  1  1 18  1 -1  0  3  1  1  5 3.0406    97
  2  1  1  5 -1  0  0  1  2  1 18 3.0406    98
  3  1  1  5 -1  1  0  4  2  1 18 3.0406    98
  1  2  1 18  1  0  0  2  1  1  5 3.0406    99
  4  2  1 18  1 -1  0  3  1  1  5 3.0406    99
  1  1  1  5  1 -1  0  2  1  1 18 3.0406    97
  2  1  1 18 -1  1  0  1  1  1  5 3.0406    97
  1  1  1  5  1 -1  0  2  2  1 18 3.0406    98
  1  1  1 18  1  0  0  2  2  1  5 3.0406    98
  2  1  1 18 -1  1  0  1  2  1  5 3.0406    98
  3  1  1 18 -1  0  0  4  2  1  5 3.0406    98
  4  1  1 18  1 -1  0  3  2  1  5 3.0406    98
  1  2  1  5  1 -1  0  2  1  1 18 3.0406    99
  2  2  1  5 -1  0  0  1  1  1 18 3.0406    99
  2  2  1 18 -1  1  0  1  1  1  5 3.0406    99
  3  2  1  5 -1  1  0  4  1  1 18 3.0406    99
  4  2  1  5  1  0  0  3  1  1 18 3.0406    99
  1  2  1  5  1 -1  0  2  2  1 18 3.0406   100
  1  2  1 18  1  0  0  2  2  1  5 3.0406   100
  2  2  1  5 -1  0  0  1  2  1 18 3.0406   100
  2  2  1 18 -1  1  0  1  2  1  5 3.0406   100
  3  2  1  5 -1  1  0  4  2  1 18 3.0406   100
  4  2  1 18  1 -1  0  3  2  1  5 3.0406   100
  3  1  1 18 -1  0  0  4  1  1  5 3.0407    97
  4  1  1  5  1  0  0  3  1  1 18 3.0407    97
  3  2  1 18 -1  0  0  4  2  1  5 3.0407   100
  4  2  1  5  1  0  0  3  2  1 18 3.0407   100
  4  1  1  5  1  0  0  3  2  1 18 3.0407    98
  3  2  1 18 -1  0  0  4  1  1  5 3.0407    99
  2  1  1 28 -1  1  0  4  1  1 21 3.0560   101
  4  1  1 21  1 -1  0  2  1  1 28 3.0560   101
  1  1  1 21  1  0  1  3  1  1 28 3.0560   101
  3  1  1 28 -1  0 -1  1  1  1 21 3.0560   101
  1  1  1 28  1  0  1  3  1  1 21 3.0560   101
  3  1  1 21 -1  0 -1  1  1  1 28 3.0560   101
  2  1  1 21 -1  1  0  4  1  1 28 3.0560   101
  4  1  1 28  1 -1  0  2  1  1 21 3.0560   101
  1  1  1 28  1  0  1  3  2  1 21 3.0573   102
  2  1  1 28 -1  1  0  4  2  1 21 3.0573   102
  3  2  1 21 -1  0 -1  1  1  1 28 3.0573   103
  4  2  1 21  1 -1  0  2  1  1 28 3.0573   103
  3  1  1 28 -1  0 -1  1  2  1 21 3.0573   102
  1  2  1 21  1  0  1  3  1  1 28 3.0573   103
  4  1  1 28  1 -1  0  2  2  1 21 3.0573   102
  2  2  1 21 -1  1  0  4  1  1 28 3.0573   103
  1  2  1 20  1  0  1  3  2  1 26 3.0573   104
  2  2  1 20 -1  1  0  4  2  1 26 3.0573   104
  3  2  1 26 -1  0 -1  1  2  1 20 3.0573   104
  4  2  1 26  1 -1  0  2  2  1 20 3.0573   104
  2  2  1 26 -1  1  0  4  2  1 20 3.0573   104
  4  2  1 20  1 -1  0  2  2  1 26 3.0573   104
  1  2  1 26  1  0  1  3  2  1 20 3.0573   104
  3  2  1 20 -1  0 -1  1  2  1 26 3.0573   104
  1  1  1 27  1 -1  0  2  2  1 27 3.0584   102
  2  2  1 27 -1  1  0  1  1  1 27 3.0584   103
  2  1  1 27 -1  0  0  1  2  1 27 3.0584   102
  3  1  1 27 -1  1  0  4  2  1 27 3.0584   102
  4  1  1 27  1  0  0  3  2  1 27 3.0584   102
  1  2  1 27  1  0  0  2  1  1 27 3.0584   103
  3  2  1 27 -1  0  0  4  1  1 27 3.0584   103
  4  2  1 27  1 -1  0  3  1  1 27 3.0584   103
  2  1  1 25  0  0  0  3  1  1 19 3.0632   105
  3  1  1 19  0  0  0  2  1  1 25 3.0632   105
  2  1  1 19  0  0  1  3  2  1 25 3.0632   106
  3  1  1 19  0  0  0  2  2  1 25 3.0632   106
  2  2  1 25  0  0  0  3  1  1 19 3.0632   107
  3  2  1 25  0  0 -1  2  1  1 19 3.0632   107
  2  2  1 19  0  0  1  3  2  1 25 3.0632   108
  3  2  1 25  0  0 -1  2  2  1 19 3.0632   108
  1  1  1 19  0  0  0  4  1  1 25 3.0632   105
  1  1  1 25  0  0  1  4  1  1 19 3.0632   105
  2  1  1 19  0  0  1  3  1  1 25 3.0632   105
  3  1  1 25  0  0 -1  2  1  1 19 3.0632   105
  4  1  1 19  0  0 -1  1  1  1 25 3.0632   105
  4  1  1 25  0  0  0  1  1  1 19 3.0632   105
  1  1  1 19  0  0  0  4  2  1 25 3.0632   106
  1  1  1 25  0  0  1  4  2  1 19 3.0632   106
  3  1  1 25  0  0 -1  2  2  1 19 3.0632   106
  4  1  1 19  0  0 -1  1  2  1 25 3.0632   106
  4  1  1 25  0  0  0  1  2  1 19 3.0632   106
  1  2  1 19  0  0  0  4  1  1 25 3.0632   107
  1  2  1 25  0  0  1  4  1  1 19 3.0632   107
  2  2  1 19  0  0  1  3  1  1 25 3.0632   107
  4  2  1 19  0  0 -1  1  1  1 25 3.0632   107
  4  2  1 25  0  0  0  1  1  1 19 3.0632   107
  1  2  1 19  0  0  0  4  2  1 25 3.0632   108
  1  2  1 25  0  0  1  4  2  1 19 3.0632   108
  4  2  1 19  0  0 -1  1  2  1 25 3.0632   108
  4  2  1 25  0  0  0  1  2  1 19 3.0632   108
  2  1  1 25  0  0  0  3  2  1 19 3.0632   106
  3  2  1 19  0  0  0  2  1  1 25 3.0632   107
  2  2  1 25  0  0  0  3  2  1 19 3.0632   108
  3  2  1 19  0  0  0  2  2  1 25 3.0632   108
  1  1  1 28  0  0  1  4  1  1 12 3.0649   105
  4  1  1 12  0  0 -1  1  1  1 28 3.0649   105
  2  1  1 28  0  0  0  3  1  1 12 3.0649   105
  3  1  1 12  0  0  0  2  1  1 28 3.0649   105
  2  1  1 28  0  0  0  3  2  1 12 3.0649   106
  3  2  1 12  0  0  0  2  1  1 28 3.0649   107
  1  1  1 12  0  0  0  4  1  1 28 3.0649   105
  4  1  1 28  0  0  0  1  1  1 12 3.0649   105
  1  1  1 28  0  0  1  4  2  1 12 3.0649   106
  4  1  1 28  0  0  0  1  2  1 12 3.0649   106
  1  2  1 12  0  0  0  4  1  1 28 3.0649   107
  4  2  1 12  0  0 -1  1  1  1 28 3.0649   107
  2  1  1 12  0  0  1  3  1  1 28 3.0649   105
  3  1  1 28  0  0 -1  2  1  1 12 3.0649   105
  3  1  1 28  0  0 -1  2  2  1 12 3.0649   106
  2  2  1 12  0  0  1  3  1  1 28 3.0649   107
  1  1  1 20  1  0  1  3  2  1 26 3.0718   110
  2  1  1 20 -1  1  0  4  2  1 26 3.0718   110
  3  2  1 26 -1  0 -1  1  1  1 20 3.0718   111
  4  2  1 26  1 -1  0  2  1  1 20 3.0718   111
  1  2  1 26  1  0  1  3  1  1 20 3.0718   111
  3  1  1 20 -1  0 -1  1  2  1 26 3.0718   110
  4  1  1 20  1 -1  0  2  2  1 26 3.0718   110
  2  2  1 26 -1  1  0  4  1  1 20 3.0718   111
  2  1  1  6 -1  0  0  3  1  1 17 3.0729   109
  3  1  1 17  1  0  0  2  1  1  6 3.0729   109
  1  1  1  6  1  0  1  4  1  1 17 3.0729   109
  4  1  1 17 -1  0 -1  1  1  1  6 3.0729   109
  1  1  1  6  1  0  1  4  2  1 17 3.0729   110
  2  1  1  6 -1  0  0  3  2  1 17 3.0729   110
  2  1  1 17  1  0  1  3  2  1  6 3.0729   110
  3  1  1  6 -1  0 -1  2  2  1 17 3.0729   110
  3  1  1 17  1  0  0  2  2  1  6 3.0729   110
  4  1  1 17 -1  0 -1  1  2  1  6 3.0729   110
  1  2  1  6  1  0  1  4  1  1 17 3.0729   111
  2  2  1  6 -1  0  0  3  1  1 17 3.0729   111
  2  2  1 17  1  0  1  3  1  1  6 3.0729   111
  3  2  1  6 -1  0 -1  2  1  1 17 3.0729   111
  3  2  1 17  1  0  0  2  1  1  6 3.0729   111
  4  2  1 17 -1  0 -1  1  1  1  6 3.0729   111
  1  2  1  6  1  0  1  4  2  1 17 3.0729   112
  2  2  1  6 -1  0  0  3  2  1 17 3.0729   112
  2  2  1 17  1  0  1  3  2  1  6 3.0729   112
  3  2  1  6 -1  0 -1  2  2  1 17 3.0729   112
  3  2  1 17  1  0  0  2  2  1  6 3.0729   112
  4  2  1 17 -1  0 -1  1  2  1  6 3.0729   112
  1  1  1 17 -1  0  0  4  1  1  6 3.0729   109
  2  1  1 17  1  0  1  3  1  1  6 3.0729   109
  3  1  1  6 -1  0 -1  2  1  1 17 3.0729   109
  4  1  1  6  1  0  0  1  1  1 17 3.0729   109
  1  1  1 17 -1  0  0  4  2  1  6 3.0729   110
  4  1  1  6  1  0  0  1  2  1 17 3.0729   110
  1  2  1 17 -1  0  0  4  1  1  6 3.0729   111
  4  2  1  6  1  0  0  1  1  1 17 3.0729   111
  1  2  1 17 -1  0  0  4  2  1  6 3.0729   112
  4  2  1  6  1  0  0  1  2  1 17 3.0729   112
  1  1  1 28  0  0  1  4  1  1 17 3.0735   109
  4  1  1 17  0  0 -1  1  1  1 28 3.0735   109
  2  1  1 28  0  0  0  3  2  1 17 3.0735   110
  3  2  1 17  0  0  0  2  1  1 28 3.0735   111
  1  1  1 17  0  0  0  4  1  1 28 3.0735   109
  2  1  1 28  0  0  0  3  1  1 17 3.0735   109
  3  1  1 17  0  0  0  2  1  1 28 3.0735   109
  4  1  1 28  0  0  0  1  1  1 17 3.0735   109
  1  1  1 28  0  0  1  4  2  1 17 3.0735   110
  4  1  1 28  0  0  0  1  2  1 17 3.0735   110
  1  2  1 17  0  0  0  4  1  1 28 3.0735   111
  4  2  1 17  0  0 -1  1  1  1 28 3.0735   111
  2  1  1 17  0  0  1  3  1  1 28 3.0735   109
  3  1  1 28  0  0 -1  2  1  1 17 3.0735   109
  3  1  1 28  0  0 -1  2  2  1 17 3.0735   110
  2  2  1 17  0  0  1  3  1  1 28 3.0735   111
  2  1  1 23 -2  1  0  4  1  1 21 3.0769   113
  4  1  1 21  2 -1  0  2  1  1 23 3.0769   113
  4  1  1 21  2 -1  0  2  2  1 23 3.0769   114
  2  2  1 23 -2  1  0  4  1  1 21 3.0769   115
  1  1  1 21  2  0  1  3  1  1 23 3.0769   113
  1  1  1 23  2  0  1  3  1  1 21 3.0769   113
  2  1  1 21 -2  1  0  4  1  1 23 3.0769   113
  3  1  1 21 -2  0 -1  1  1  1 23 3.0769   113
  3  1  1 23 -2  0 -1  1  1  1 21 3.0769   113
  4  1  1 23  2 -1  0  2  1  1 21 3.0769   113
  1  1  1 21  2  0  1  3  2  1 23 3.0769   114
  3  1  1 21 -2  0 -1  1  2  1 23 3.0769   114
  1  2  1 23  2  0  1  3  1  1 21 3.0769   115
  3  2  1 23 -2  0 -1  1  1  1 21 3.0769   115
  2  1  1 21 -2  1  0  4  2  1 23 3.0769   114
  4  2  1 23  2 -1  0  2  1  1 21 3.0769   115
  1  1  1 22  2  0  1  3  2  1 26 3.0835   118
  2  1  1 22 -2  1  0  4  2  1 26 3.0835   118
  4  1  1 22  2 -1  0  2  2  1 26 3.0835   118
  2  2  1 26 -2  1  0  4  1  1 22 3.0835   119
  3  2  1 26 -2  0 -1  1  1  1 22 3.0835   119
  4  2  1 26  2 -1  0  2  1  1 22 3.0835   119
  1  2  1 22  2  0  1  3  2  1 26 3.0835   120
  1  2  1 26  2  0  1  3  2  1 22 3.0835   120
  2  2  1 22 -2  1  0  4  2  1 26 3.0835   120
  2  2  1 26 -2  1  0  4  2  1 22 3.0835   120
  3  2  1 22 -2  0 -1  1  2  1 26 3.0835   120
  3  2  1 26 -2  0 -1  1  2  1 22 3.0835   120
  4  2  1 22  2 -1  0  2  2  1 26 3.0835   120
  4  2  1 26  2 -1  0  2  2  1 22 3.0835   120
  3  1  1 22 -2  0 -1  1  2  1 26 3.0835   118
  1  2  1 26  2  0  1  3  1  1 22 3.0835   119
  1  1  1  7  1  0  1  3  2  1 28 3.0911   122
  4  1  1  7  1 -1  0  2  2  1 28 3.0911   122
  2  2  1 28 -1  1  0  4  1  1  7 3.0911   123
  3  2  1 28 -1  0 -1  1  1  1  7 3.0911   123
  1  2  1  7  1  0  1  3  2  1 28 3.0911   124
  2  2  1  7 -1  1  0  4  2  1 28 3.0911   124
  2  2  1 28 -1  1  0  4  2  1  7 3.0911   124
  3  2  1 28 -1  0 -1  1  2  1  7 3.0911   124
  4  2  1  7  1 -1  0  2  2  1 28 3.0911   124
  4  2  1 28  1 -1  0  2  2  1  7 3.0911   124
  2  1  1  7 -1  1  0  4  2  1 28 3.0911   122
  3  1  1  7 -1  0 -1  1  2  1 28 3.0911   122
  1  2  1 28  1  0  1  3  1  1  7 3.0911   123
  4  2  1 28  1 -1  0  2  1  1  7 3.0911   123
  1  2  1 28  1  0  1  3  2  1  7 3.0911   124
  3  2  1  7 -1  0 -1  1  2  1 28 3.0911   124
  3  1  1 10 -1  1  0  4  1  1 19 3.0946   121
  3  1  1 19 -1  0  0  4  1  1 10 3.0946   121
  4  1  1 10  1  0  0  3  1  1 19 3.0946   121
  4  1  1 19  1 -1  0  3  1  1 10 3.0946   121
  4  1  1 10  1  0  0  3  2  1 19 3.0946   122
  4  1  1 19  1 -1  0  3  2  1 10 3.0946   122
  3  2  1 10 -1  1  0  4  1  1 19 3.0946   123
  3  2  1 19 -1  0  0  4  1  1 10 3.0946   123
  1  1  1 10  1 -1  0  2  1  1 19 3.0946   121
  1  1  1 19  1  0  0  2  1  1 10 3.0946   121
  2  1  1 10 -1  0  0  1  1  1 19 3.0946   121
  2  1  1 19 -1  1  0  1  1  1 10 3.0946   121
  1  1  1 10  1 -1  0  2  2  1 19 3.0946   122
  1  1  1 19  1  0  0  2  2  1 10 3.0946   122
  2  1  1 10 -1  0  0  1  2  1 19 3.0946   122
  2  1  1 19 -1  1  0  1  2  1 10 3.0946   122
  3  1  1 10 -1  1  0  4  2  1 19 3.0946   122
  1  2  1 10  1 -1  0  2  1  1 19 3.0946   123
  1  2  1 19  1  0  0  2  1  1 10 3.0946   123
  2  2  1 10 -1  0  0  1  1  1 19 3.0946   123
  2  2  1 19 -1  1  0  1  1  1 10 3.0946   123
  4  2  1 19  1 -1  0  3  1  1 10 3.0946   123
  1  2  1 10  1 -1  0  2  2  1 19 3.0946   124
  1  2  1 19  1  0  0  2  2  1 10 3.0946   124
  2  2  1 10 -1  0  0  1  2  1 19 3.0946   124
  2  2  1 19 -1  1  0  1  2  1 10 3.0946   124
  3  2  1 10 -1  1  0  4  2  1 19 3.0946   124
  3  2  1 19 -1  0  0  4  2  1 10 3.0946   124
  4  2  1 10  1  0  0  3  2  1 19 3.0946   124
  4  2  1 19  1 -1  0  3  2  1 10 3.0946   124
  3  1  1 19 -1  0  0  4  2  1 10 3.0946   122
  4  2  1 10  1  0  0  3  1  1 19 3.0946   123
  2  1  1 16  1  0  0  2  1  1 22 3.1040   125
  2  1  1 22 -1  0  0  2  1  1 16 3.1040   125
  2  1  1 22 -1  0  0  2  2  1 16 3.1040   126
  2  2  1 16  1  0  0  2  1  1 22 3.1040   127
  3  1  1 16  1  0  0  3  1  1 22 3.1040   125
  3  1  1 22 -1  0  0  3  1  1 16 3.1040   125
  2  1  1 16  1  0  0  2  2  1 22 3.1040   126
  2  2  1 22 -1  0  0  2  1  1 16 3.1040   127
  2  2  1 16  1  0  0  2  2  1 22 3.1040   128
  2  2  1 22 -1  0  0  2  2  1 16 3.1040   128
  1  1  1 16 -1  0  0  1  1  1 22 3.1040   125
  1  1  1 22  1  0  0  1  1  1 16 3.1040   125
  1  1  1 16 -1  0  0  1  2  1 22 3.1040   126
  1  1  1 22  1  0  0  1  2  1 16 3.1040   126
  3  1  1 22 -1  0  0  3  2  1 16 3.1040   126
  1  2  1 16 -1  0  0  1  1  1 22 3.1040   127
  1  2  1 22  1  0  0  1  1  1 16 3.1040   127
  3  2  1 16  1  0  0  3  1  1 22 3.1040   127
  1  2  1 16 -1  0  0  1  2  1 22 3.1040   128
  1  2  1 22  1  0  0  1  2  1 16 3.1040   128
  4  2  1 16 -1  0  0  4  2  1 22 3.1040   128
  4  2  1 22  1  0  0  4  2  1 16 3.1040   128
  3  1  1 16  1  0  0  3  2  1 22 3.1040   126
  4  1  1 22  1  0  0  4  2  1 16 3.1040   126
  3  2  1 22 -1  0  0  3  1  1 16 3.1040   127
  4  2  1 16 -1  0  0  4  1  1 22 3.1040   127
  3  2  1 16  1  0  0  3  2  1 22 3.1040   128
  3  2  1 22 -1  0  0  3  2  1 16 3.1040   128
  4  1  1 16 -1  0  0  4  2  1 22 3.1040   126
  4  2  1 22  1  0  0  4  1  1 16 3.1040   127
  4  1  1 16 -1  0  0  4  1  1 22 3.1040   125
  4  1  1 22  1  0  0  4  1  1 16 3.1040   125
  1  1  1 27  0  0  1  4  1  1 18 3.1148   129
  2  1  1 27  0  0  0  3  1  1 18 3.1148   129
  3  1  1 18  0  0  0  2  1  1 27 3.1148   129
  4  1  1 18  0  0 -1  1  1  1 27 3.1148   129
  1  1  1 18  0  0  0  4  1  1 27 3.1149   129
  2  1  1 18  0  0  1  3  1  1 27 3.1149   129
  3  1  1 27  0  0 -1  2  1  1 18 3.1149   129
  4  1  1 27  0  0  0  1  1  1 18 3.1149   129
  1  1  1 27  0  0  1  4  2  1 18 3.1149   130
  2  1  1 27  0  0  0  3  2  1 18 3.1149   130
  3  1  1 27  0  0 -1  2  2  1 18 3.1149   130
  4  1  1 27  0  0  0  1  2  1 18 3.1149   130
  1  2  1 18  0  0  0  4  1  1 27 3.1149   131
  2  2  1 18  0  0  1  3  1  1 27 3.1149   131
  3  2  1 18  0  0  0  2  1  1 27 3.1149   131
  4  2  1 18  0  0 -1  1  1  1 27 3.1149   131
  1  1  1  2  0  0  0  4  1  1 24 3.1254   133
  4  1  1 24  0  0  0  1  1  1  2 3.1254   133
  1  1  1  2  0  0  0  4  2  1 24 3.1254   134
  4  1  1 24  0  0  0  1  2  1  2 3.1254   134
  1  2  1  2  0  0  0  4  1  1 24 3.1254   135
  4  2  1 24  0  0  0  1  1  1  2 3.1254   135
  1  2  1  2  0  0  0  4  2  1 24 3.1254   136
  4  2  1 24  0  0  0  1  2  1  2 3.1254   136
  2  1  1  2  0  0  1  3  2  1 24 3.1254   134
  3  1  1  2  0  0  0  2  2  1 24 3.1254   134
  2  2  1 24  0  0  0  3  1  1  2 3.1254   135
  3  2  1 24  0  0 -1  2  1  1  2 3.1254   135
  2  1  1  2  0  0  1  3  1  1 24 3.1254   133
  2  1  1 24  0  0  0  3  1  1  2 3.1254   133
  3  1  1  2  0  0  0  2  1  1 24 3.1254   133
  3  1  1 24  0  0 -1  2  1  1  2 3.1254   133
  2  2  1  2  0  0  1  3  2  1 24 3.1254   136
  3  2  1 24  0  0 -1  2  2  1  2 3.1254   136
  1  1  1 24  0  0  1  4  1  1  2 3.1254   133
  4  1  1  2  0  0 -1  1  1  1 24 3.1254   133
  2  1  1 24  0  0  0  3  2  1  2 3.1254   134
  3  1  1 24  0  0 -1  2  2  1  2 3.1254   134
  4  1  1  2  0  0 -1  1  2  1 24 3.1254   134
  1  2  1 24  0  0  1  4  1  1  2 3.1254   135
  2  2  1  2  0  0  1  3  1  1 24 3.1254   135
  3  2  1  2  0  0  0  2  1  1 24 3.1254   135
  4  2  1  2  0  0 -1  1  1  1 24 3.1254   135
  2  2  1 24  0  0  0  3  2  1  2 3.1254   136
  3  2  1  2  0  0  0  2  2  1 24 3.1254   136
  4  2  1  2  0  0 -1  1  2  1 24 3.1254   136
  1  1  1 24  0  0  1  4  2  1  2 3.1254   134
  1  2  1 24  0  0  1  4  2  1  2 3.1254   136
  1  1  1 23  2  0  1  3  2  1 21 3.1303   134
  3  2  1 21 -2  0 -1  1  1  1 23 3.1303   135
  2  1  1 23 -2  1  0  4  2  1 21 3.1303   134
  3  1  1 23 -2  0 -1  1  2  1 21 3.1303   134
  4  1  1 23  2 -1  0  2  2  1 21 3.1303   134
  1  2  1 21  2  0  1  3  1  1 23 3.1303   135
  2  2  1 21 -2  1  0  4  1  1 23 3.1303   135
  4  2  1 21  2 -1  0  2  1  1 23 3.1303   135
  1  2  1 21  2  0  1  3  2  1 23 3.1303   136
  1  2  1 23  2  0  1  3  2  1 21 3.1303   136
  2  2  1 23 -2  1  0  4  2  1 21 3.1303   136
  3  2  1 21 -2  0 -1  1  2  1 23 3.1303   136
  3  2  1 23 -2  0 -1  1  2  1 21 3.1303   136
  4  2  1 21  2 -1  0  2  2  1 23 3.1303   136
  2  2  1 21 -2  1  0  4  2  1 23 3.1304   136
  4  2  1 23  2 -1  0  2  2  1 21 3.1304   136
  3  1  1 12  0  0  0  4  1  1 26 3.1350   137
  4  1  1 26  0  0  0  3  1  1 12 3.1350   137
  3  1  1 26  0  1  0  4  2  1 12 3.1350   138
  4  1  1 26  0  0  0  3  2  1 12 3.1350   138
  3  2  1 12  0  0  0  4  1  1 26 3.1350   139
  4  2  1 12  0 -1  0  3  1  1 26 3.1350   139
  1  1  1 12  0  0  0  2  1  1 26 3.1350   137
  1  1  1 26  0 -1  0  2  1  1 12 3.1350   137
  2  1  1 12  0  1  0  1  1  1 26 3.1350   137
  2  1  1 26  0  0  0  1  1  1 12 3.1350   137
  3  1  1 26  0  1  0  4  1  1 12 3.1350   137
  4  1  1 12  0 -1  0  3  1  1 26 3.1350   137
  1  1  1 26  0 -1  0  2  2  1 12 3.1350   138
  2  1  1 26  0  0  0  1  2  1 12 3.1350   138
  1  2  1 12  0  0  0  2  1  1 26 3.1350   139
  2  2  1 12  0  1  0  1  1  1 26 3.1350   139
  2  1  1 23 -1  0  0  3  1  1 12 3.1483   141
  3  1  1 12  1  0  0  2  1  1 23 3.1483   141
  2  1  1 23 -1  0  0  3  2  1 12 3.1483   142
  3  2  1 12  1  0  0  2  1  1 23 3.1483   143
  1  1  1 12 -1  0  0  4  1  1 23 3.1483   141
  1  1  1 23  1  0  1  4  1  1 12 3.1483   141
  4  1  1 12 -1  0 -1  1  1  1 23 3.1483   141
  4  1  1 23  1  0  0  1  1  1 12 3.1483   141
  1  1  1 12 -1  0  0  4  2  1 23 3.1483   142
  1  1  1 23  1  0  1  4  2  1 12 3.1483   142
  3  1  1 12  1  0  0  2  2  1 23 3.1483   142
  4  1  1 12 -1  0 -1  1  2  1 23 3.1483   142
  4  1  1 23  1  0  0  1  2  1 12 3.1483   142
  1  2  1 12 -1  0  0  4  1  1 23 3.1483   143
  1  2  1 23  1  0  1  4  1  1 12 3.1483   143
  2  2  1 23 -1  0  0  3  1  1 12 3.1483   143
  4  2  1 12 -1  0 -1  1  1  1 23 3.1483   143
  4  2  1 23  1  0  0  1  1  1 12 3.1483   143
  1  2  1 12 -1  0  0  4  2  1 23 3.1483   144
  1  2  1 23  1  0  1  4  2  1 12 3.1483   144
  2  2  1 12  1  0  1  3  2  1 23 3.1483   144
  2  2  1 23 -1  0  0  3  2  1 12 3.1483   144
  3  2  1 12  1  0  0  2  2  1 23 3.1483   144
  3  2  1 23 -1  0 -1  2  2  1 12 3.1483   144
  4  2  1 12 -1  0 -1  1  2  1 23 3.1483   144
  4  2  1 23  1  0  0  1  2  1 12 3.1483   144
  2  1  1 12  1  0  1  3  1  1 23 3.1483   141
  3  1  1 23 -1  0 -1  2  1  1 12 3.1483   141
  2  1  1 12  1  0  1  3  2  1 23 3.1483   142
  3  1  1 23 -1  0 -1  2  2  1 12 3.1483   142
  2  2  1 12  1  0  1  3  1  1 23 3.1483   143
  3  2  1 23 -1  0 -1  2  1  1 12 3.1483   143
  1  1  1  5  1  0  1  4  1  1 17 3.1504   141
  2  1  1  5 -1  0  0  3  1  1 17 3.1504   141
  3  1  1 17  1  0  0  2  1  1  5 3.1504   141
  4  1  1 17 -1  0 -1  1  1  1  5 3.1504   141
  2  1  1  5 -1  0  0  3  2  1 17 3.1504   142
  3  1  1 17  1  0  0  2  2  1  5 3.1504   142
  4  1  1 17 -1  0 -1  1  2  1  5 3.1504   142
  1  2  1  5  1  0  1  4  1  1 17 3.1504   143
  2  2  1  5 -1  0  0  3  1  1 17 3.1504   143
  3  2  1 17  1  0  0  2  1  1  5 3.1504   143
  2  2  1  5 -1  0  0  3  2  1 17 3.1504   144
  3  2  1 17  1  0  0  2  2  1  5 3.1504   144
  1  1  1 17 -1  0  0  4  1  1  5 3.1504   141
  2  1  1 17  1  0  1  3  1  1  5 3.1504   141
  3  1  1  5 -1  0 -1  2  1  1 17 3.1504   141
  4  1  1  5  1  0  0  1  1  1 17 3.1504   141
  1  1  1  5  1  0  1  4  2  1 17 3.1504   142
  1  1  1 17 -1  0  0  4  2  1  5 3.1504   142
  2  1  1 17  1  0  1  3  2  1  5 3.1504   142
  3  1  1  5 -1  0 -1  2  2  1 17 3.1504   142
  4  1  1  5  1  0  0  1  2  1 17 3.1504   142
  1  2  1 17 -1  0  0  4  1  1  5 3.1504   143
  2  2  1 17  1  0  1  3  1  1  5 3.1504   143
  3  2  1  5 -1  0 -1  2  1  1 17 3.1504   143
  4  2  1  5  1  0  0  1  1  1 17 3.1504   143
  4  2  1 17 -1  0 -1  1  1  1  5 3.1504   143
  1  2  1  5  1  0  1  4  2  1 17 3.1504   144
  1  2  1 17 -1  0  0  4  2  1  5 3.1504   144
  2  2  1 17  1  0  1  3  2  1  5 3.1504   144
  3  2  1  5 -1  0 -1  2  2  1 17 3.1504   144
  4  2  1  5  1  0  0  1  2  1 17 3.1504   144
  4  2  1 17 -1  0 -1  1  2  1  5 3.1504   144
  4  1  1 16  1  0  0  3  2  1 28 3.1555   146
  3  2  1 28 -1  0  0  4  1  1 16 3.1555   147
  3  2  1 16 -1  1  0  4  2  1 28 3.1555   148
  4  2  1 28  1 -1  0  3  2  1 16 3.1555   148
  1  1  1 16  1 -1  0  2  2  1 28 3.1555   146
  2  1  1 16 -1  0  0  1  2  1 28 3.1555   146
  3  1  1 16 -1  1  0  4  2  1 28 3.1555   146
  1  2  1 28  1  0  0  2  1  1 16 3.1555   147
  2  2  1 28 -1  1  0  1  1  1 16 3.1555   147
  4  2  1 28  1 -1  0  3  1  1 16 3.1555   147
  1  2  1 16  1 -1  0  2  2  1 28 3.1555   148
  1  2  1 28  1  0  0  2  2  1 16 3.1555   148
  2  2  1 16 -1  0  0  1  2  1 28 3.1555   148
  2  2  1 28 -1  1  0  1  2  1 16 3.1555   148
  3  2  1 28 -1  0  0  4  2  1 16 3.1555   148
  4  2  1 16  1  0  0  3  2  1 28 3.1555   148
  3  1  1  8 -1  1  0  4  1  1 18 3.1567   145
  4  1  1 18  1 -1  0  3  1  1  8 3.1567   145
  4  1  1 18  1 -1  0  3  2  1  8 3.1567   146
  3  2  1  8 -1  1  0  4  1  1 18 3.1567   147
  1  1  1  8  1 -1  0  2  1  1 18 3.1567   145
  1  1  1 18  1  0  0  2  1  1  8 3.1567   145
  2  1  1  8 -1  0  0  1  1  1 18 3.1567   145
  2  1  1 18 -1  1  0  1  1  1  8 3.1567   145
  2  1  1  8 -1  0  0  1  2  1 18 3.1567   146
  2  1  1 18 -1  1  0  1  2  1  8 3.1567   146
  3  1  1  8 -1  1  0  4  2  1 18 3.1567   146
  4  1  1  8  1  0  0  3  2  1 18 3.1567   146
  1  2  1  8  1 -1  0  2  1  1 18 3.1567   147
  1  2  1 18  1  0  0  2  1  1  8 3.1567   147
  3  2  1 18 -1  0  0  4  1  1  8 3.1567   147
  4  2  1 18  1 -1  0  3  1  1  8 3.1567   147
  3  2  1  8 -1  1  0  4  2  1 18 3.1567   148
  4  2  1 18  1 -1  0  3  2  1  8 3.1567   148
  3  1  1 18 -1  0  0  4  1  1  8 3.1567   145
  4  1  1  8  1  0  0  3  1  1 18 3.1567   145
  1  1  1  8  1 -1  0  2  2  1 18 3.1567   146
  1  1  1 18  1  0  0  2  2  1  8 3.1567   146
  2  2  1  8 -1  0  0  1  1  1 18 3.1567   147
  2  2  1 18 -1  1  0  1  1  1  8 3.1567   147
  1  2  1  8  1 -1  0  2  2  1 18 3.1567   148
  1  2  1 18  1  0  0  2  2  1  8 3.1567   148
  2  2  1  8 -1  0  0  1  2  1 18 3.1567   148
  2  2  1 18 -1  1  0  1  2  1  8 3.1567   148
  3  2  1 18 -1  0  0  4  2  1  8 3.1567   148
  4  2  1  8  1  0  0  3  2  1 18 3.1567   148
  3  1  1 18 -1  0  0  4  2  1  8 3.1567   146
  4  2  1  8  1  0  0  3  1  1 18 3.1567   147
  1  1  1 18  0  0  0  2  1  1 16 3.1676   149
  2  1  1 16  0  0  0  1  1  1 18 3.1676   149
  1  1  1 16  0 -1  0  2  2  1 18 3.1676   150
  1  1  1 18  0  0  0  2  2  1 16 3.1676   150
  2  1  1 16  0  0  0  1  2  1 18 3.1676   150
  1  2  1 18  0  0  0  2  1  1 16 3.1676   151
  2  2  1 16  0  0  0  1  1  1 18 3.1676   151
  2  2  1 18  0  1  0  1  1  1 16 3.1676   151
  1  2  1 16  0 -1  0  2  2  1 18 3.1676   152
  1  2  1 18  0  0  0  2  2  1 16 3.1676   152
  2  2  1 16  0  0  0  1  2  1 18 3.1676   152
  2  2  1 18  0  1  0  1  2  1 16 3.1676   152
  1  1  1 16  0 -1  0  2  1  1 18 3.1676   149
  2  1  1 18  0  1  0  1  1  1 16 3.1676   149
  2  1  1 18  0  1  0  1  2  1 16 3.1676   150
  3  1  1 16  0  1  0  4  2  1 18 3.1676   150
  3  1  1 18  0  0  0  4  2  1 16 3.1676   150
  4  1  1 16  0  0  0  3  2  1 18 3.1676   150
  1  2  1 16  0 -1  0  2  1  1 18 3.1676   151
  3  2  1 18  0  0  0  4  1  1 16 3.1676   151
  4  2  1 16  0  0  0  3  1  1 18 3.1676   151
  4  2  1 18  0 -1  0  3  1  1 16 3.1676   151
  3  2  1 16  0  1  0  4  2  1 18 3.1676   152
  3  2  1 18  0  0  0  4  2  1 16 3.1676   152
  4  2  1 16  0  0  0  3  2  1 18 3.1676   152
  4  2  1 18  0 -1  0  3  2  1 16 3.1676   152
  3  1  1 16  0  1  0  4  1  1 18 3.1676   149
  3  1  1 18  0  0  0  4  1  1 16 3.1676   149
  4  1  1 16  0  0  0  3  1  1 18 3.1676   149
  4  1  1 18  0 -1  0  3  1  1 16 3.1676   149
  4  1  1 18  0 -1  0  3  2  1 16 3.1676   150
  3  2  1 16  0  1  0  4  1  1 18 3.1676   151
  1  1  1 12 -1  0  0  1  2  1 27 3.1687   150
  2  1  1 12  1  0  0  2  2  1 27 3.1687   150
  1  2  1 27  1  0  0  1  1  1 12 3.1687   151
  2  2  1 27 -1  0  0  2  1  1 12 3.1687   151
  1  2  1 12 -1  0  0  1  2  1 27 3.1687   152
  1  2  1 27  1  0  0  1  2  1 12 3.1687   152
  2  2  1 12  1  0  0  2  2  1 27 3.1687   152
  2  2  1 27 -1  0  0  2  2  1 12 3.1687   152
  4  2  1 12 -1  0  0  4  2  1 27 3.1687   152
  4  2  1 27  1  0  0  4  2  1 12 3.1687   152
  3  1  1 12  1  0  0  3  2  1 27 3.1688   150
  3  2  1 27 -1  0  0  3  1  1 12 3.1688   151
  3  2  1 12  1  0  0  3  2  1 27 3.1688   152
  3  2  1 27 -1  0  0  3  2  1 12 3.1688   152
  4  1  1 12 -1  0  0  4  2  1 27 3.1688   150
  4  2  1 27  1  0  0  4  1  1 12 3.1688   151
  2  1  1 23 -2  1  0  4  2  1 28 3.1757   154
  4  2  1 28  2 -1  0  2  1  1 23 3.1757   155
  2  2  1 23 -2  1  0  4  2  1 28 3.1757   156
  4  2  1 28  2 -1  0  2  2  1 23 3.1757   156
  1  1  1 23  2  0  1  3  2  1 28 3.1758   154
  3  1  1 23 -2  0 -1  1  2  1 28 3.1758   154
  1  2  1 28  2  0  1  3  1  1 23 3.1758   155
  3  2  1 28 -2  0 -1  1  1  1 23 3.1758   155
  1  2  1 23  2  0  1  3  2  1 28 3.1758   156
  1  2  1 28  2  0  1  3  2  1 23 3.1758   156
  3  2  1 23 -2  0 -1  1  2  1 28 3.1758   156
  3  2  1 28 -2  0 -1  1  2  1 23 3.1758   156
  4  1  1 23  2 -1  0  2  2  1 28 3.1758   154
  2  2  1 28 -2  1  0  4  1  1 23 3.1758   155
  4  2  1 23  2 -1  0  2  2  1 28 3.1758   156
  2  2  1 28 -2  1  0  4  2  1 23 3.1758   156
  3  1  1 13  0  0  0  4  1  1 26 3.1780   153
  4  1  1 26  0  0  0  3  1  1 13 3.1780   153
  1  1  1 26  0 -1  0  2  2  1 13 3.1780   154
  3  1  1 26  0  1  0  4  2  1 13 3.1780   154
  4  1  1 26  0  0  0  3  2  1 13 3.1780   154
  2  2  1 13  0  1  0  1  1  1 26 3.1780   155
  3  2  1 13  0  0  0  4  1  1 26 3.1780   155
  4  2  1 13  0 -1  0  3  1  1 26 3.1780   155
  1  1  1 13  0  0  0  2  1  1 26 3.1780   153
  1  1  1 26  0 -1  0  2  1  1 13 3.1780   153
  2  1  1 13  0  1  0  1  1  1 26 3.1780   153
  2  1  1 26  0  0  0  1  1  1 13 3.1780   153
  3  1  1 26  0  1  0  4  1  1 13 3.1780   153
  4  1  1 13  0 -1  0  3  1  1 26 3.1780   153
  2  1  1 26  0  0  0  1  2  1 13 3.1780   154
  1  2  1 13  0  0  0  2  1  1 26 3.1780   155
  4  2  1 16 -1  0  0  4  2  1 27 3.1795   156
  4  2  1 27  1  0  0  4  2  1 16 3.1795   156
  1  1  1 16 -1  0  0  1  2  1 27 3.1795   154
  2  1  1 16  1  0  0  2  2  1 27 3.1795   154
  3  1  1 16  1  0  0  3  2  1 27 3.1795   154
  1  2  1 27  1  0  0  1  1  1 16 3.1795   155
  2  2  1 27 -1  0  0  2  1  1 16 3.1795   155
  3  2  1 27 -1  0  0  3  1  1 16 3.1795   155
  1  2  1 16 -1  0  0  1  2  1 27 3.1795   156
  1  2  1 27  1  0  0  1  2  1 16 3.1795   156
  2  2  1 16  1  0  0  2  2  1 27 3.1795   156
  2  2  1 27 -1  0  0  2  2  1 16 3.1795   156
  4  1  1 16 -1  0  0  4  2  1 27 3.1795   154
  4  2  1 27  1  0  0  4  1  1 16 3.1795   155
  3  2  1 16  1  0  0  3  2  1 27 3.1795   156
  3  2  1 27 -1  0  0  3  2  1 16 3.1795   156
  1  1  1 27  1 -1  0  2  1  1 19 3.1818   157
  2  1  1 19 -1  1  0  1  1  1 27 3.1818   157
  3  1  1 19 -1  0  0  4  1  1 27 3.1818   157
  3  1  1 27 -1  1  0  4  1  1 19 3.1818   157
  4  1  1 19  1 -1  0  3  1  1 27 3.1818   157
  4  1  1 27  1  0  0  3  1  1 19 3.1818   157
  1  1  1 19  1  0  0  2  1  1 27 3.1818   157
  2  1  1 27 -1  0  0  1  1  1 19 3.1818   157
  1  1  1 27  1 -1  0  2  2  1 19 3.1818   158
  3  1  1 27 -1  1  0  4  2  1 19 3.1818   158
  4  1  1 27  1  0  0  3  2  1 19 3.1818   158
  2  2  1 19 -1  1  0  1  1  1 27 3.1818   159
  3  2  1 19 -1  0  0  4  1  1 27 3.1818   159
  4  2  1 19  1 -1  0  3  1  1 27 3.1818   159
  2  1  1 27 -1  0  0  1  2  1 19 3.1819   158
  1  2  1 19  1  0  0  2  1  1 27 3.1819   159
  1  1  1  9  1  0  1  3  2  1 26 3.1892   162
  2  1  1  9 -1  1  0  4  2  1 26 3.1892   162
  3  2  1 26 -1  0 -1  1  1  1  9 3.1892   163
  4  2  1 26  1 -1  0  2  1  1  9 3.1892   163
  1  2  1  9  1  0  1  3  2  1 26 3.1892   164
  2  2  1  9 -1  1  0  4  2  1 26 3.1892   164
  3  2  1 26 -1  0 -1  1  2  1  9 3.1892   164
  4  2  1 26  1 -1  0  2  2  1  9 3.1892   164
  2  2  1 26 -1  1  0  4  2  1  9 3.1892   164
  4  2  1  9  1 -1  0  2  2  1 26 3.1892   164
  3  1  1  9 -1  0 -1  1  2  1 26 3.1892   162
  4  1  1  9  1 -1  0  2  2  1 26 3.1892   162
  1  2  1 26  1  0  1  3  1  1  9 3.1892   163
  2  2  1 26 -1  1  0  4  1  1  9 3.1892   163
  1  2  1 26  1  0  1  3  2  1  9 3.1892   164
  3  2  1  9 -1  0 -1  1  2  1 26 3.1892   164
  3  1  1  6 -1  1  0  4  1  1 18 3.2166   173
  4  1  1 18  1 -1  0  3  1  1  6 3.2166   173
  1  1  1  6  1 -1  0  2  1  1 18 3.2166   173
  1  1  1 18  1  0  0  2  1  1  6 3.2166   173
  2  1  1  6 -1  0  0  1  1  1 18 3.2166   173
  2  1  1 18 -1  1  0  1  1  1  6 3.2166   173
  2  1  1  6 -1  0  0  1  2  1 18 3.2166   174
  2  1  1 18 -1  1  0  1  2  1  6 3.2166   174
  3  1  1  6 -1  1  0  4  2  1 18 3.2166   174
  4  1  1 18  1 -1  0  3  2  1  6 3.2166   174
  1  2  1  6  1 -1  0  2  1  1 18 3.2166   175
  1  2  1 18  1  0  0  2  1  1  6 3.2166   175
  3  2  1  6 -1  1  0  4  1  1 18 3.2166   175
  4  2  1 18  1 -1  0  3  1  1  6 3.2166   175
  3  1  1 18 -1  0  0  4  1  1  6 3.2166   173
  4  1  1  6  1  0  0  3  1  1 18 3.2166   173
  1  1  1  6  1 -1  0  2  2  1 18 3.2166   174
  1  1  1 18  1  0  0  2  2  1  6 3.2166   174
  3  1  1 18 -1  0  0  4  2  1  6 3.2166   174
  2  2  1  6 -1  0  0  1  1  1 18 3.2166   175
  2  2  1 18 -1  1  0  1  1  1  6 3.2166   175
  4  2  1  6  1  0  0  3  1  1 18 3.2166   175
  1  2  1  6  1 -1  0  2  2  1 18 3.2166   176
  1  2  1 18  1  0  0  2  2  1  6 3.2166   176
  2  2  1  6 -1  0  0  1  2  1 18 3.2166   176
  2  2  1 18 -1  1  0  1  2  1  6 3.2166   176
  3  2  1  6 -1  1  0  4  2  1 18 3.2166   176
  4  2  1 18  1 -1  0  3  2  1  6 3.2166   176
  4  1  1  6  1  0  0  3  2  1 18 3.2166   174
  3  2  1 18 -1  0  0  4  1  1  6 3.2166   175
  3  2  1 18 -1  0  0  4  2  1  6 3.2166   176
  4  2  1  6  1  0  0  3  2  1 18 3.2166   176
  1  1  1 11 -1  0  0  4  1  1 23 3.2262   177
  1  1  1 23  1  0  1  4  1  1 11 3.2262   177
  2  1  1 23 -1  0  0  3  1  1 11 3.2262   177
  3  1  1 11  1  0  0  2  1  1 23 3.2262   177
  4  1  1 11 -1  0 -1  1  1  1 23 3.2262   177
  4  1  1 23  1  0  0  1  1  1 11 3.2262   177
  1  1  1 11 -1  0  0  4  2  1 23 3.2262   178
  2  1  1 23 -1  0  0  3  2  1 11 3.2262   178
  3  1  1 11  1  0  0  2  2  1 23 3.2262   178
  4  1  1 11 -1  0 -1  1  2  1 23 3.2262   178
  4  1  1 23  1  0  0  1  2  1 11 3.2262   178
  1  2  1 11 -1  0  0  4  1  1 23 3.2262   179
  1  2  1 23  1  0  1  4  1  1 11 3.2262   179
  2  2  1 23 -1  0  0  3  1  1 11 3.2262   179
  3  2  1 11  1  0  0  2  1  1 23 3.2262   179
  4  2  1 11 -1  0 -1  1  1  1 23 3.2262   179
  4  2  1 23  1  0  0  1  1  1 11 3.2262   179
  1  2  1 11 -1  0  0  4  2  1 23 3.2262   180
  2  2  1 23 -1  0  0  3  2  1 11 3.2262   180
  3  2  1 11  1  0  0  2  2  1 23 3.2262   180
  4  2  1 23  1  0  0  1  2  1 11 3.2262   180
  1  1  1 23  1  0  1  4  2  1 11 3.2262   178
  2  1  1 11  1  0  1  3  2  1 23 3.2262   178
  3  2  1 23 -1  0 -1  2  1  1 11 3.2262   179
  1  2  1 23  1  0  1  4  2  1 11 3.2262   180
  2  2  1 11  1  0  1  3  2  1 23 3.2262   180
  3  2  1 23 -1  0 -1  2  2  1 11 3.2262   180
  4  2  1 11 -1  0 -1  1  2  1 23 3.2262   180
  2  1  1 11  1  0  1  3  1  1 23 3.2262   177
  3  1  1 23 -1  0 -1  2  1  1 11 3.2262   177
  3  1  1 23 -1  0 -1  2  2  1 11 3.2262   178
  2  2  1 11  1  0  1  3  1  1 23 3.2262   179
  1  1  1 19  1  0  0  2  1  1  3 3.2558   181
  2  1  1  3 -1  0  0  1  1  1 19 3.2558   181
  3  1  1  3 -1  1  0  4  1  1 19 3.2558   181
  4  1  1 19  1 -1  0  3  1  1  3 3.2558   181
  1  1  1 19  1  0  0  2  2  1  3 3.2558   182
  2  1  1  3 -1  0  0  1  2  1 19 3.2558   182
  3  1  1  3 -1  1  0  4  2  1 19 3.2558   182
  3  1  1 19 -1  0  0  4  2  1  3 3.2558   182
  1  2  1 19  1  0  0  2  1  1  3 3.2558   183
  2  2  1  3 -1  0  0  1  1  1 19 3.2558   183
  4  2  1  3  1  0  0  3  1  1 19 3.2558   183
  4  2  1 19  1 -1  0  3  1  1  3 3.2558   183
  1  2  1 19  1  0  0  2  2  1  3 3.2558   184
  2  2  1  3 -1  0  0  1  2  1 19 3.2558   184
  1  1  1  3  1 -1  0  2  1  1 19 3.2558   181
  2  1  1 19 -1  1  0  1  1  1  3 3.2558   181
  3  1  1 19 -1  0  0  4  1  1  3 3.2558   181
  4  1  1  3  1  0  0  3  1  1 19 3.2558   181
  1  1  1  3  1 -1  0  2  2  1 19 3.2558   182
  2  1  1 19 -1  1  0  1  2  1  3 3.2558   182
  4  1  1  3  1  0  0  3  2  1 19 3.2558   182
  4  1  1 19  1 -1  0  3  2  1  3 3.2558   182
  1  2  1  3  1 -1  0  2  1  1 19 3.2558   183
  2  2  1 19 -1  1  0  1  1  1  3 3.2558   183
  3  2  1  3 -1  1  0  4  1  1 19 3.2558   183
  3  2  1 19 -1  0  0  4  1  1  3 3.2558   183
  1  2  1  3  1 -1  0  2  2  1 19 3.2558   184
  2  2  1 19 -1  1  0  1  2  1  3 3.2558   184
  3  2  1  3 -1  1  0  4  2  1 19 3.2558   184
  3  2  1 19 -1  0  0  4  2  1  3 3.2558   184
  4  2  1  3  1  0  0  3  2  1 19 3.2558   184
  4  2  1 19  1 -1  0  3  2  1  3 3.2558   184
  3  1  1  7 -1  1  0  4  1  1 18 3.2645   185
  4  1  1 18  1 -1  0  3  1  1  7 3.2645   185
  4  1  1 18  1 -1  0  3  2  1  7 3.2645   186
  3  2  1  7 -1  1  0  4  1  1 18 3.2645   187
  1  1  1  7  1 -1  0  2  1  1 18 3.2645   185
  1  1  1 18  1  0  0  2  1  1  7 3.2645   185
  2  1  1  7 -1  0  0  1  1  1 18 3.2645   185
  2  1  1 18 -1  1  0  1  1  1  7 3.2645   185
  2  1  1 18 -1  1  0  1  2  1  7 3.2645   186
  3  1  1  7 -1  1  0  4  2  1 18 3.2645   186
  1  2  1  7  1 -1  0  2  1  1 18 3.2645   187
  4  2  1 18  1 -1  0  3  1  1  7 3.2645   187
  3  2  1  7 -1  1  0  4  2  1 18 3.2645   188
  4  2  1 18  1 -1  0  3  2  1  7 3.2645   188
  3  1  1 18 -1  0  0  4  1  1  7 3.2645   185
  4  1  1  7  1  0  0  3  1  1 18 3.2645   185
  1  1  1  7  1 -1  0  2  2  1 18 3.2645   186
  1  1  1 18  1  0  0  2  2  1  7 3.2645   186
  2  1  1  7 -1  0  0  1  2  1 18 3.2645   186
  4  1  1  7  1  0  0  3  2  1 18 3.2645   186
  1  2  1 18  1  0  0  2  1  1  7 3.2645   187
  2  2  1  7 -1  0  0  1  1  1 18 3.2645   187
  2  2  1 18 -1  1  0  1  1  1  7 3.2645   187
  3  2  1 18 -1  0  0  4  1  1  7 3.2645   187
  1  2  1  7  1 -1  0  2  2  1 18 3.2645   188
  1  2  1 18  1  0  0  2  2  1  7 3.2645   188
  2  2  1  7 -1  0  0  1  2  1 18 3.2645   188
  2  2  1 18 -1  1  0  1  2  1  7 3.2645   188
  3  1  1 18 -1  0  0  4  2  1  7 3.2645   186
  4  2  1  7  1  0  0  3  1  1 18 3.2645   187
  3  2  1 18 -1  0  0  4  2  1  7 3.2645   188
  4  2  1  7  1  0  0  3  2  1 18 3.2645   188
  1  1  1 28  0  0  1  4  1  1 13 3.2775   189
  2  1  1 28  0  0  0  3  1  1 13 3.2775   189
  3  1  1 13  0  0  0  2  1  1 28 3.2775   189
  4  1  1 13  0  0 -1  1  1  1 28 3.2775   189
  1  1  1 13  0  0  0  4  1  1 28 3.2775   189
  2  1  1 13  0  0  1  3  1  1 28 3.2775   189
  3  1  1 28  0  0 -1  2  1  1 13 3.2775   189
  4  1  1 28  0  0  0  1  1  1 13 3.2775   189
  1  1  1 28  0  0  1  4  2  1 13 3.2775   190
  2  1  1 28  0  0  0  3  2  1 13 3.2775   190
  3  1  1 28  0  0 -1  2  2  1 13 3.2775   190
  4  1  1 28  0  0  0  1  2  1 13 3.2775   190
  1  2  1 13  0  0  0  4  1  1 28 3.2775   191
  2  2  1 13  0  0  1  3  1  1 28 3.2775   191
  3  2  1 13  0  0  0  2  1  1 28 3.2775   191
  4  2  1 13  0  0 -1  1  1  1 28 3.2775   191
  1  1  1  5  2  0  1  3  2  1 26 3.3144   194
  2  1  1  5 -2  1  0  4  2  1 26 3.3144   194
  3  1  1  5 -2  0 -1  1  2  1 26 3.3144   194
  1  2  1 26  2  0  1  3  1  1  5 3.3144   195
  3  2  1 26 -2  0 -1  1  1  1  5 3.3144   195
  4  2  1 26  2 -1  0  2  1  1  5 3.3144   195
  1  2  1  5  2  0  1  3  2  1 26 3.3144   196
  2  2  1  5 -2  1  0  4  2  1 26 3.3144   196
  3  2  1 26 -2  0 -1  1  2  1  5 3.3144   196
  4  2  1 26  2 -1  0  2  2  1  5 3.3144   196
  4  1  1  5  2 -1  0  2  2  1 26 3.3144   194
  2  2  1 26 -2  1  0  4  1  1  5 3.3144   195
  1  2  1 26  2  0  1  3  2  1  5 3.3144   196
  3  2  1  5 -2  0 -1  1  2  1 26 3.3144   196
  2  2  1 26 -2  1  0  4  2  1  5 3.3144   196
  4  2  1  5  2 -1  0  2  2  1 26 3.3144   196
  3  1  1 15  0  0  0  2  2  1 25 3.3181   194
  2  2  1 25  0  0  0  3  1  1 15 3.3181   195
  1  1  1 15  0  0  0  4  1  1 25 3.3182   193
  2  1  1 25  0  0  0  3  1  1 15 3.3182   193
  3  1  1 15  0  0  0  2  1  1 25 3.3182   193
  4  1  1 25  0  0  0  1  1  1 15 3.3182   193
  1  1  1 15  0  0  0  4  2  1 25 3.3182   194
  4  1  1 25  0  0  0  1  2  1 15 3.3182   194
  1  2  1 15  0  0  0  4  1  1 25 3.3182   195
  4  2  1 25  0  0  0  1  1  1 15 3.3182   195
  1  2  1 15  0  0  0  4  2  1 25 3.3182   196
  2  2  1 25  0  0  0  3  2  1 15 3.3182   196
  3  2  1 15  0  0  0  2  2  1 25 3.3182   196
  4  2  1 25  0  0  0  1  2  1 15 3.3182   196
  1  1  1 25  0  0  1  4  1  1 15 3.3182   193
  2  1  1 15  0  0  1  3  1  1 25 3.3182   193
  3  1  1 25  0  0 -1  2  1  1 15 3.3182   193
  4  1  1 15  0  0 -1  1  1  1 25 3.3182   193
  1  1  1 25  0  0  1  4  2  1 15 3.3182   194
  2  1  1 15  0  0  1  3  2  1 25 3.3182   194
  2  1  1 25  0  0  0  3  2  1 15 3.3182   194
  4  1  1 15  0  0 -1  1  2  1 25 3.3182   194
  1  2  1 25  0  0  1  4  1  1 15 3.3182   195
  3  2  1 15  0  0  0  2  1  1 25 3.3182   195
  3  2  1 25  0  0 -1  2  1  1 15 3.3182   195
  4  2  1 15  0  0 -1  1  1  1 25 3.3182   195
  1  2  1 25  0  0  1  4  2  1 15 3.3182   196
  2  2  1 15  0  0  1  3  2  1 25 3.3182   196
  3  2  1 25  0  0 -1  2  2  1 15 3.3182   196
  4  2  1 15  0  0 -1  1  2  1 25 3.3182   196
  3  1  1 25  0  0 -1  2  2  1 15 3.3182   194
  2  2  1 15  0  0  1  3  1  1 25 3.3182   195
  1  1  1  7  1 -1  1  3  1  1 27 3.3210   197
  1  1  1 27  1 -1  1  3  1  1  7 3.3210   197
  2  1  1  7 -1  0  0  4  1  1 27 3.3210   197
  3  1  1  7 -1  1 -1  1  1  1 27 3.3210   197
  3  1  1 27 -1  1 -1  1  1  1  7 3.3210   197
  4  1  1 27  1  0  0  2  1  1  7 3.3210   197
  1  1  1 27  1 -1  1  3  2  1  7 3.3210   198
  3  1  1 27 -1  1 -1  1  2  1  7 3.3210   198
  4  1  1 27  1  0  0  2  2  1  7 3.3210   198
  1  2  1  7  1 -1  1  3  1  1 27 3.3210   199
  2  2  1  7 -1  0  0  4  1  1 27 3.3210   199
  3  2  1  7 -1  1 -1  1  1  1 27 3.3210   199
  2  1  1 27 -1  0  0  4  1  1  7 3.3211   197
  4  1  1  7  1  0  0  2  1  1 27 3.3211   197
  2  1  1 27 -1  0  0  4  2  1  7 3.3211   198
  4  2  1  7  1  0  0  2  1  1 27 3.3211   199
  1  1  1 22  2  0  1  3  1  1  4 3.3289   201
  2  1  1  4 -2  1  0  4  1  1 22 3.3289   201
  3  1  1  4 -2  0 -1  1  1  1 22 3.3289   201
  4  1  1  4  2 -1  0  2  1  1 22 3.3289   201
  4  1  1 22  2 -1  0  2  1  1  4 3.3289   201
  1  1  1  4  2  0  1  3  2  1 22 3.3289   202
  1  1  1 22  2  0  1  3  2  1  4 3.3289   202
  4  1  1  4  2 -1  0  2  2  1 22 3.3289   202
  4  1  1 22  2 -1  0  2  2  1  4 3.3289   202
  2  2  1  4 -2  1  0  4  1  1 22 3.3289   203
  2  2  1 22 -2  1  0  4  1  1  4 3.3289   203
  3  2  1  4 -2  0 -1  1  1  1 22 3.3289   203
  3  2  1 22 -2  0 -1  1  1  1  4 3.3289   203
  1  2  1  4  2  0  1  3  2  1 22 3.3289   204
  3  2  1 22 -2  0 -1  1  2  1  4 3.3289   204
  1  1  1  4  2  0  1  3  1  1 22 3.3290   201
  2  1  1 22 -2  1  0  4  1  1  4 3.3290   201
  3  1  1 22 -2  0 -1  1  1  1  4 3.3290   201
  2  1  1  4 -2  1  0  4  2  1 22 3.3290   202
  2  1  1 22 -2  1  0  4  2  1  4 3.3290   202
  3  1  1  4 -2  0 -1  1  2  1 22 3.3290   202
  3  1  1 22 -2  0 -1  1  2  1  4 3.3290   202
  1  2  1  4  2  0  1  3  1  1 22 3.3290   203
  1  2  1 22  2  0  1  3  1  1  4 3.3290   203
  4  2  1  4  2 -1  0  2  1  1 22 3.3290   203
  4  2  1 22  2 -1  0  2  1  1  4 3.3290   203
  1  2  1 22  2  0  1  3  2  1  4 3.3290   204
  2  2  1  4 -2  1  0  4  2  1 22 3.3290   204
  2  2  1 22 -2  1  0  4  2  1  4 3.3290   204
  3  2  1  4 -2  0 -1  1  2  1 22 3.3290   204
  4  2  1  4  2 -1  0  2  2  1 22 3.3290   204
  4  2  1 22  2 -1  0  2  2  1  4 3.3290   204
  2  1  1  5 -1  0  0  2  1  1 28 3.3333   205
  2  1  1 28  1  0  0  2  1  1  5 3.3333   205
  1  1  1  5  1  0  0  1  1  1 28 3.3334   205
  1  1  1 28 -1  0  0  1  1  1  5 3.3334   205
  3  1  1  5 -1  0  0  3  1  1 28 3.3334   205
  3  1  1 28  1  0  0  3  1  1  5 3.3334   205
  1  1  1 28 -1  0  0  1  2  1  5 3.3334   206
  2  1  1 28  1  0  0  2  2  1  5 3.3334   206
  1  2  1  5  1  0  0  1  1  1 28 3.3334   207
  2  2  1  5 -1  0  0  2  1  1 28 3.3334   207
  4  1  1  5  1  0  0  4  1  1 28 3.3334   205
  4  1  1 28 -1  0  0  4  1  1  5 3.3334   205
  3  1  1 28  1  0  0  3  2  1  5 3.3334   206
  3  2  1  5 -1  0  0  3  1  1 28 3.3334   207
  4  1  1 28 -1  0  0  4  2  1  5 3.3334   206
  4  2  1  5  1  0  0  4  1  1 28 3.3334   207
  1  2  1 27  0  0  0  4  2  1  6 3.3533   212
  2  2  1 27  0  0  1  3  2  1  6 3.3533   212
  3  2  1  6  0  0 -1  2  2  1 27 3.3533   212
  4  2  1  6  0  0  0  1  2  1 27 3.3533   212
  3  1  1  6  0  0 -1  2  2  1 27 3.3533   210
  4  1  1  6  0  0  0  1  2  1 27 3.3533   210
  1  2  1 27  0  0  0  4  1  1  6 3.3533   211
  2  2  1 27  0  0  1  3  1  1  6 3.3533   211
  1  1  1  6  0  0  1  4  2  1 27 3.3533   210
  2  1  1  6  0  0  0  3  2  1 27 3.3533   210
  3  2  1 27  0  0  0  2  1  1  6 3.3533   211
  4  2  1 27  0  0 -1  1  1  1  6 3.3533   211
  1  2  1  6  0  0  1  4  2  1 27 3.3533   212
  2  2  1  6  0  0  0  3  2  1 27 3.3533   212
  3  2  1 27  0  0  0  2  2  1  6 3.3533   212
  4  2  1 27  0  0 -1  1  2  1  6 3.3533   212
  1  1  1 15  0  0  0  4  1  1 24 3.3549   209
  4  1  1 24  0  0  0  1  1  1 15 3.3549   209
  1  1  1 15  0  0  0  4  2  1 24 3.3549   210
  4  1  1 24  0  0  0  1  2  1 15 3.3549   210
  1  2  1 15  0  0  0  4  1  1 24 3.3549   211
  4  2  1 24  0  0  0  1  1  1 15 3.3549   211
  1  2  1 15  0  0  0  4  2  1 24 3.3549   212
  4  2  1 24  0  0  0  1  2  1 15 3.3549   212
  2  1  1 15  0  0  1  3  2  1 24 3.3549   210
  3  1  1 15  0  0  0  2  2  1 24 3.3549   210
  2  2  1 24  0  0  0  3  1  1 15 3.3549   211
  3  2  1 24  0  0 -1  2  1  1 15 3.3549   211
  1  1  1 24  0  0  1  4  1  1 15 3.3549   209
  2  1  1 15  0  0  1  3  1  1 24 3.3549   209
  2  1  1 24  0  0  0  3  1  1 15 3.3549   209
  3  1  1 15  0  0  0  2  1  1 24 3.3549   209
  3  1  1 24  0  0 -1  2  1  1 15 3.3549   209
  4  1  1 15  0  0 -1  1  1  1 24 3.3549   209
  4  1  1 15  0  0 -1  1  2  1 24 3.3549   210
  1  2  1 24  0  0  1  4  1  1 15 3.3549   211
  2  2  1 15  0  0  1  3  2  1 24 3.3549   212
  2  2  1 24  0  0  0  3  2  1 15 3.3549   212
  3  2  1 15  0  0  0  2  2  1 24 3.3549   212
  3  2  1 24  0  0 -1  2  2  1 15 3.3549   212
  1  1  1 24  0  0  1  4  2  1 15 3.3549   210
  2  1  1 24  0  0  0  3  2  1 15 3.3549   210
  3  1  1 24  0  0 -1  2  2  1 15 3.3549   210
  2  2  1 15  0  0  1  3  1  1 24 3.3549   211
  3  2  1 15  0  0  0  2  1  1 24 3.3549   211
  4  2  1 15  0  0 -1  1  1  1 24 3.3549   211
  1  2  1 24  0  0  1  4  2  1 15 3.3549   212
  4  2  1 15  0  0 -1  1  2  1 24 3.3549   212
  2  1  1 17  1  0  0  2  1  1 21 3.3640   213
  2  1  1 21 -1  0  0  2  1  1 17 3.3640   213
  2  1  1 21 -1  0  0  2  2  1 17 3.3640   214
  2  2  1 17  1  0  0  2  1  1 21 3.3640   215
  1  1  1 17 -1  0  0  1  1  1 21 3.3640   213
  1  1  1 21  1  0  0  1  1  1 17 3.3640   213
  3  1  1 17  1  0  0  3  1  1 21 3.3640   213
  3  1  1 21 -1  0  0  3  1  1 17 3.3640   213
  1  1  1 21  1  0  0  1  2  1 17 3.3640   214
  1  2  1 17 -1  0  0  1  1  1 21 3.3640   215
  3  1  1 21 -1  0  0  3  2  1 17 3.3640   214
  3  2  1 17  1  0  0  3  1  1 21 3.3640   215
  4  1  1 21  1  0  0  4  2  1 17 3.3641   214
  4  2  1 17 -1  0  0  4  1  1 21 3.3641   215
  4  1  1 17 -1  0  0  4  1  1 21 3.3641   213
  4  1  1 21  1  0  0  4  1  1 17 3.3641   213
  2  1  1 23 -1  0  0  2  2  1 20 3.3762   218
  2  2  1 20  1  0  0  2  1  1 23 3.3762   219
  2  2  1 20  1  0  0  2  2  1 23 3.3762   220
  2  2  1 23 -1  0  0  2  2  1 20 3.3762   220
  1  1  1 23  1  0  0  1  2  1 20 3.3762   218
  3  1  1 23 -1  0  0  3  2  1 20 3.3762   218
  1  2  1 20 -1  0  0  1  1  1 23 3.3762   219
  3  2  1 20  1  0  0  3  1  1 23 3.3762   219
  1  2  1 20 -1  0  0  1  2  1 23 3.3762   220
  1  2  1 23  1  0  0  1  2  1 20 3.3762   220
  4  1  1 23  1  0  0  4  2  1 20 3.3762   218
  4  2  1 20 -1  0  0  4  1  1 23 3.3762   219
  4  2  1 20 -1  0  0  4  2  1 23 3.3762   220
  4  2  1 23  1  0  0  4  2  1 20 3.3762   220
  3  2  1 20  1  0  0  3  2  1 23 3.3762   220
  3  2  1 23 -1  0  0  3  2  1 20 3.3762   220
  1  1  1  9  1 -1  0  2  2  1 28 3.4071   222
  2  2  1 28 -1  1  0  1  1  1  9 3.4071   223
  1  2  1  9  1 -1  0  2  2  1 28 3.4071   224
  2  2  1 28 -1  1  0  1  2  1  9 3.4071   224
  2  1  1  9 -1  0  0  1  2  1 28 3.4071   222
  3  1  1  9 -1  1  0  4  2  1 28 3.4071   222
  4  1  1  9  1  0  0  3  2  1 28 3.4071   222
  1  2  1 28  1  0  0  2  1  1  9 3.4071   223
  3  2  1 28 -1  0  0  4  1  1  9 3.4071   223
  4  2  1 28  1 -1  0  3  1  1  9 3.4071   223
  1  2  1 28  1  0  0  2  2  1  9 3.4071   224
  2  2  1  9 -1  0  0  1  2  1 28 3.4071   224
  3  2  1  9 -1  1  0  4  2  1 28 3.4071   224
  4  2  1 28  1 -1  0  3  2  1  9 3.4071   224
  3  2  1 28 -1  0  0  4  2  1  9 3.4072   224
  4  2  1  9  1  0  0  3  2  1 28 3.4072   224
  2  1  1 24 -1  0  0  3  1  1 12 3.4179   225
  3  1  1 12  1  0  0  2  1  1 24 3.4179   225
  2  1  1 12  1  0  1  3  1  1 24 3.4179   225
  3  1  1 24 -1  0 -1  2  1  1 12 3.4179   225
  1  1  1 24  1  0  1  4  2  1 12 3.4179   226
  2  1  1 24 -1  0  0  3  2  1 12 3.4179   226
  3  1  1 12  1  0  0  2  2  1 24 3.4179   226
  3  1  1 24 -1  0 -1  2  2  1 12 3.4179   226
  2  2  1 12  1  0  1  3  1  1 24 3.4179   227
  2  2  1 24 -1  0  0  3  1  1 12 3.4179   227
  3  2  1 12  1  0  0  2  1  1 24 3.4179   227
  4  2  1 12 -1  0 -1  1  1  1 24 3.4179   227
  1  2  1 24  1  0  1  4  2  1 12 3.4179   228
  2  2  1 12  1  0  1  3  2  1 24 3.4179   228
  2  2  1 24 -1  0  0  3  2  1 12 3.4179   228
  3  2  1 12  1  0  0  2  2  1 24 3.4179   228
  3  2  1 24 -1  0 -1  2  2  1 12 3.4179   228
  4  2  1 12 -1  0 -1  1  2  1 24 3.4179   228
  1  1  1 12 -1  0  0  4  1  1 24 3.4179   225
  1  1  1 24  1  0  1  4  1  1 12 3.4179   225
  4  1  1 12 -1  0 -1  1  1  1 24 3.4179   225
  4  1  1 24  1  0  0  1  1  1 12 3.4179   225
  2  1  1 12  1  0  1  3  2  1 24 3.4179   226
  4  1  1 12 -1  0 -1  1  2  1 24 3.4179   226
  4  1  1 24  1  0  0  1  2  1 12 3.4179   226
  1  2  1 12 -1  0  0  4  1  1 24 3.4179   227
  1  2  1 24  1  0  1  4  1  1 12 3.4179   227
  3  2  1 24 -1  0 -1  2  1  1 12 3.4179   227
  1  1  1 12 -1  0  0  4  2  1 24 3.4179   226
  4  2  1 24  1  0  0  1  1  1 12 3.4179   227
  1  2  1 12 -1  0  0  4  2  1 24 3.4179   228
  4  2  1 24  1  0  0  1  2  1 12 3.4179   228
  1  1  1 17 -1  0  0  1  2  1 21 3.4275   230
  2  1  1 17  1  0  0  2  2  1 21 3.4275   230
  1  2  1 21  1  0  0  1  1  1 17 3.4275   231
  2  2  1 21 -1  0  0  2  1  1 17 3.4275   231
  1  2  1 17 -1  0  0  1  2  1 21 3.4275   232
  1  2  1 21  1  0  0  1  2  1 17 3.4275   232
  2  2  1 17  1  0  0  2  2  1 21 3.4275   232
  2  2  1 21 -1  0  0  2  2  1 17 3.4275   232
  4  2  1 17 -1  0  0  4  2  1 21 3.4275   232
  3  1  1 17  1  0  0  3  2  1 21 3.4276   230
  3  2  1 21 -1  0  0  3  1  1 17 3.4276   231
  4  2  1 21  1  0  0  4  2  1 17 3.4276   232
  3  2  1 17  1  0  0  3  2  1 21 3.4276   232
  3  2  1 21 -1  0  0  3  2  1 17 3.4276   232
  4  1  1 17 -1  0  0  4  2  1 21 3.4276   230
  4  2  1 21  1  0  0  4  1  1 17 3.4276   231
  2  1  1  4 -1  0  0  2  1  1 26 3.4277   229
  2  1  1 26  1  0  0  2  1  1  4 3.4277   229
  3  1  1  4 -1  0  0  3  1  1 26 3.4277   229
  3  1  1 26  1  0  0  3  1  1  4 3.4277   229
  2  1  1 26  1  0  0  2  2  1  4 3.4277   230
  2  2  1  4 -1  0  0  2  1  1 26 3.4277   231
  1  1  1  4  1  0  0  1  1  1 26 3.4277   229
  1  1  1 26 -1  0  0  1  1  1  4 3.4277   229
  1  1  1 26 -1  0  0  1  2  1  4 3.4277   230
  1  2  1  4  1  0  0  1  1  1 26 3.4277   231
  3  1  1 26  1  0  0  3  2  1  4 3.4277   230
  3  2  1  4 -1  0  0  3  1  1 26 3.4277   231
  4  1  1  4  1  0  0  4  1  1 26 3.4277   229
  4  1  1 26 -1  0  0  4  1  1  4 3.4277   229
  4  1  1 26 -1  0  0  4  2  1  4 3.4277   230
  4  2  1  4  1  0  0  4  1  1 26 3.4277   231
  2  1  1 27  0  0  0  3  1  1 13 3.4286   229
  3  1  1 13  0  0  0  2  1  1 27 3.4286   229
  1  1  1 27  0  0  1  4  1  1 13 3.4286   229
  4  1  1 13  0  0 -1  1  1  1 27 3.4286   229
  2  1  1 27  0  0  0  3  2  1 13 3.4286   230
  3  2  1 13  0  0  0  2  1  1 27 3.4286   231
  1  1  1 13  0  0  0  4  1  1 27 3.4286   229
  2  1  1 13  0  0  1  3  1  1 27 3.4286   229
  3  1  1 27  0  0 -1  2  1  1 13 3.4286   229
  4  1  1 27  0  0  0  1  1  1 13 3.4286   229
  1  1  1 27  0  0  1  4  2  1 13 3.4286   230
  3  1  1 27  0  0 -1  2  2  1 13 3.4286   230
  4  1  1 27  0  0  0  1  2  1 13 3.4286   230
  1  2  1 13  0  0  0  4  1  1 27 3.4286   231
  2  2  1 13  0  0  1  3  1  1 27 3.4286   231
  4  2  1 13  0  0 -1  1  1  1 27 3.4286   231
  1  1  1 20  1 -1  0  2  2  1 27 3.4378   234
  2  1  1 20 -1  0  0  1  2  1 27 3.4378   234
  4  1  1 20  1  0  0  3  2  1 27 3.4378   234
  1  2  1 27  1  0  0  2  1  1 20 3.4378   235
  2  2  1 27 -1  1  0  1  1  1 20 3.4378   235
  3  2  1 27 -1  0  0  4  1  1 20 3.4378   235
  3  1  1 20 -1  1  0  4  2  1 27 3.4378   234
  4  2  1 27  1 -1  0  3  1  1 20 3.4378   235
  2  1  1 20  1  0  0  2  1  1 23 3.4386   233
  2  1  1 23 -1  0  0  2  1  1 20 3.4386   233
  1  1  1 20 -1  0  0  1  1  1 23 3.4387   233
  1  1  1 23  1  0  0  1  1  1 20 3.4387   233
  3  1  1 20  1  0  0  3  1  1 23 3.4387   233
  3  1  1 23 -1  0  0  3  1  1 20 3.4387   233
  1  1  1 20 -1  0  0  1  2  1 23 3.4387   234
  2  1  1 20  1  0  0  2  2  1 23 3.4387   234
  1  2  1 23  1  0  0  1  1  1 20 3.4387   235
  2  2  1 23 -1  0  0  2  1  1 20 3.4387   235
  3  1  1 20  1  0  0  3  2  1 23 3.4387   234
  3  2  1 23 -1  0  0  3  1  1 20 3.4387   235
  4  1  1 20 -1  0  0  4  2  1 23 3.4387   234
  4  2  1 23  1  0  0  4  1  1 20 3.4387   235
  4  1  1 20 -1  0  0  4  1  1 23 3.4387   233
  4  1  1 23  1  0  0  4  1  1 20 3.4387   233
  1  1  1 14  0  0  0  4  2  1 24 3.4438   238
  4  2  1 24  0  0  0  1  1  1 14 3.4438   239
  1  2  1 14  0  0  0  4  2  1 24 3.4438   240
  4  2  1 24  0  0  0  1  2  1 14 3.4438   240
  1  1  1 14  0  0  0  4  1  1 24 3.4438   237
  4  1  1 24  0  0  0  1  1  1 14 3.4438   237
  2  1  1 14  0  0  1  3  2  1 24 3.4438   238
  4  1  1 24  0  0  0  1  2  1 14 3.4438   238
  1  2  1 14  0  0  0  4  1  1 24 3.4438   239
  3  2  1 24  0  0 -1  2  1  1 14 3.4438   239
  1  1  1 24  0  0  1  4  1  1 14 3.4438   237
  2  1  1 14  0  0  1  3  1  1 24 3.4438   237
  2  1  1 24  0  0  0  3  1  1 14 3.4438   237
  3  1  1 14  0  0  0  2  1  1 24 3.4438   237
  3  1  1 24  0  0 -1  2  1  1 14 3.4438   237
  4  1  1 14  0  0 -1  1  1  1 24 3.4438   237
  3  1  1 14  0  0  0  2  2  1 24 3.4438   238
  4  1  1 14  0  0 -1  1  2  1 24 3.4438   238
  1  2  1 24  0  0  1  4  1  1 14 3.4438   239
  2  2  1 24  0  0  0  3  1  1 14 3.4438   239
  1  2  1 24  0  0  1  4  2  1 14 3.4438   240
  2  2  1 14  0  0  1  3  2  1 24 3.4438   240
  3  2  1 24  0  0 -1  2  2  1 14 3.4438   240
  4  2  1 14  0  0 -1  1  2  1 24 3.4438   240
  1  1  1 24  0  0  1  4  2  1 14 3.4438   238
  2  1  1 24  0  0  0  3  2  1 14 3.4438   238
  3  1  1 24  0  0 -1  2  2  1 14 3.4438   238
  2  2  1 14  0  0  1  3  1  1 24 3.4438   239
  3  2  1 14  0  0  0  2  1  1 24 3.4438   239
  4  2  1 14  0  0 -1  1  1  1 24 3.4438   239
  2  2  1 24  0  0  0  3  2  1 14 3.4438   240
  3  2  1 14  0  0  0  2  2  1 24 3.4438   240
  3  1  1 18  0  0  0  4  2  1 20 3.4466   238
  4  2  1 20  0  0  0  3  1  1 18 3.4466   239
  3  2  1 18  0  0  0  4  2  1 20 3.4466   240
  4  2  1 20  0  0  0  3  2  1 18 3.4466   240
  1  1  1 18  0  0  0  2  2  1 20 3.4466   238
  2  1  1 18  0  1  0  1  2  1 20 3.4466   238
  1  2  1 20  0 -1  0  2  1  1 18 3.4466   239
  2  2  1 20  0  0  0  1  1  1 18 3.4466   239
  1  2  1 18  0  0  0  2  2  1 20 3.4466   240
  1  2  1 20  0 -1  0  2  2  1 18 3.4466   240
  2  2  1 18  0  1  0  1  2  1 20 3.4466   240
  2  2  1 20  0  0  0  1  2  1 18 3.4466   240
  3  2  1 20  0  1  0  4  2  1 18 3.4466   240
  4  2  1 18  0 -1  0  3  2  1 20 3.4466   240
  4  1  1 18  0 -1  0  3  2  1 20 3.4466   238
  3  2  1 20  0  1  0  4  1  1 18 3.4466   239
  4  2  1 11 -1  0  0  4  2  1 27 3.4520   244
  4  2  1 27  1  0  0  4  2  1 11 3.4520   244
  1  1  1 11 -1  0  0  1  2  1 27 3.4520   242
  2  1  1 11  1  0  0  2  2  1 27 3.4520   242
  3  1  1 11  1  0  0  3  2  1 27 3.4520   242
  1  2  1 27  1  0  0  1  1  1 11 3.4520   243
  2  2  1 27 -1  0  0  2  1  1 11 3.4520   243
  3  2  1 27 -1  0  0  3  1  1 11 3.4520   243
  1  2  1 11 -1  0  0  1  2  1 27 3.4520   244
  1  2  1 27  1  0  0  1  2  1 11 3.4520   244
  2  2  1 11  1  0  0  2  2  1 27 3.4520   244
  2  2  1 27 -1  0  0  2  2  1 11 3.4520   244
  4  1  1 11 -1  0  0  4  2  1 27 3.4520   242
  4  2  1 27  1  0  0  4  1  1 11 3.4520   243
  3  2  1 11  1  0  0  3  2  1 27 3.4520   244
  3  2  1 27 -1  0  0  3  2  1 11 3.4520   244
  1  1  1 19  1  0  0  2  1  1 15 3.4633   245
  2  1  1 15 -1  0  0  1  1  1 19 3.4633   245
  4  1  1 15  1  0  0  3  2  1 19 3.4633   246
  3  2  1 19 -1  0  0  4  1  1 15 3.4633   247
  3  2  1 19 -1  0  0  4  2  1 15 3.4633   248
  4  2  1 15  1  0  0  3  2  1 19 3.4633   248
  1  1  1 15  1 -1  0  2  1  1 19 3.4633   245
  2  1  1 19 -1  1  0  1  1  1 15 3.4633   245
  3  1  1 15 -1  1  0  4  1  1 19 3.4633   245
  3  1  1 19 -1  0  0  4  1  1 15 3.4633   245
  4  1  1 15  1  0  0  3  1  1 19 3.4633   245
  4  1  1 19  1 -1  0  3  1  1 15 3.4633   245
  1  1  1 15  1 -1  0  2  2  1 19 3.4633   246
  1  1  1 19  1  0  0  2  2  1 15 3.4633   246
  2  1  1 15 -1  0  0  1  2  1 19 3.4633   246
  2  1  1 19 -1  1  0  1  2  1 15 3.4633   246
  3  1  1 15 -1  1  0  4  2  1 19 3.4633   246
  3  1  1 19 -1  0  0  4  2  1 15 3.4633   246
  4  1  1 19  1 -1  0  3  2  1 15 3.4633   246
  1  2  1 15  1 -1  0  2  1  1 19 3.4633   247
  1  2  1 19  1  0  0  2  1  1 15 3.4633   247
  2  2  1 15 -1  0  0  1  1  1 19 3.4633   247
  2  2  1 19 -1  1  0  1  1  1 15 3.4633   247
  3  2  1 15 -1  1  0  4  1  1 19 3.4633   247
  4  2  1 15  1  0  0  3  1  1 19 3.4633   247
  4  2  1 19  1 -1  0  3  1  1 15 3.4633   247
  1  2  1 15  1 -1  0  2  2  1 19 3.4633   248
  1  2  1 19  1  0  0  2  2  1 15 3.4633   248
  2  2  1 15 -1  0  0  1  2  1 19 3.4633   248
  2  2  1 19 -1  1  0  1  2  1 15 3.4633   248
  3  2  1 15 -1  1  0  4  2  1 19 3.4633   248
  4  2  1 19  1 -1  0  3  2  1 15 3.4633   248
  4  1  1  6  1 -1  0  2  2  1 14 3.4675   246
  2  2  1 14 -1  1  0  4  1  1  6 3.4675   247
  2  2  1 14 -1  1  0  4  2  1  6 3.4675   248
  4  2  1  6  1 -1  0  2  2  1 14 3.4675   248
  2  1  1 14 -1  1  0  4  1  1  6 3.4675   245
  4  1  1  6  1 -1  0  2  1  1 14 3.4675   245
  2  1  1 14 -1  1  0  4  2  1  6 3.4675   246
  4  1  1 14  1 -1  0  2  2  1  6 3.4675   246
  2  2  1  6 -1  1  0  4  1  1 14 3.4675   247
  4  2  1  6  1 -1  0  2  1  1 14 3.4675   247
  1  2  1 14  1  0  1  3  2  1  6 3.4675   248
  2  2  1  6 -1  1  0  4  2  1 14 3.4675   248
  4  2  1 14  1 -1  0  2  2  1  6 3.4675   248
  1  1  1 14  1  0  1  3  1  1  6 3.4675   245
  3  1  1  6 -1  0 -1  1  1  1 14 3.4675   245
  1  1  1  6  1  0  1  3  2  1 14 3.4675   246
  1  1  1 14  1  0  1  3  2  1  6 3.4675   246
  2  1  1  6 -1  1  0  4  2  1 14 3.4675   246
  3  1  1  6 -1  0 -1  1  2  1 14 3.4675   246
  1  2  1 14  1  0  1  3  1  1  6 3.4675   247
  3  2  1  6 -1  0 -1  1  1  1 14 3.4675   247
  3  2  1 14 -1  0 -1  1  1  1  6 3.4675   247
  4  2  1 14  1 -1  0  2  1  1  6 3.4675   247
  1  2  1  6  1  0  1  3  2  1 14 3.4675   248
  3  2  1  6 -1  0 -1  1  2  1 14 3.4675   248
  3  2  1 14 -1  0 -1  1  2  1  6 3.4675   248
  1  1  1  6  1  0  1  3  1  1 14 3.4675   245
  2  1  1  6 -1  1  0  4  1  1 14 3.4675   245
  3  1  1 14 -1  0 -1  1  1  1  6 3.4675   245
  4  1  1 14  1 -1  0  2  1  1  6 3.4675   245
  3  1  1 14 -1  0 -1  1  2  1  6 3.4675   246
  1  2  1  6  1  0  1  3  1  1 14 3.4675   247
  4  1  1 12  1  0  0  3  2  1 28 3.4675   246
  3  2  1 28 -1  0  0  4  1  1 12 3.4675   247
  1  1  1 12  1 -1  0  2  2  1 28 3.4675   246
  2  1  1 12 -1  0  0  1  2  1 28 3.4675   246
  3  1  1 12 -1  1  0  4  2  1 28 3.4675   246
  1  2  1 28  1  0  0  2  1  1 12 3.4675   247
  2  2  1 28 -1  1  0  1  1  1 12 3.4675   247
  4  2  1 28  1 -1  0  3  1  1 12 3.4675   247
  1  2  1 12  1 -1  0  2  2  1 28 3.4675   248
  1  2  1 28  1  0  0  2  2  1 12 3.4675   248
  2  2  1 12 -1  0  0  1  2  1 28 3.4675   248
  2  2  1 28 -1  1  0  1  2  1 12 3.4675   248
  3  2  1 12 -1  1  0  4  2  1 28 3.4675   248
  3  2  1 28 -1  0  0  4  2  1 12 3.4675   248
  4  2  1 12  1  0  0  3  2  1 28 3.4675   248
  4  2  1 28  1 -1  0  3  2  1 12 3.4675   248
  1  1  1  8  1  0  1  3  2  1 26 3.4713   250
  2  1  1  8 -1  1  0  4  2  1 26 3.4713   250
  2  2  1 26 -1  1  0  4  1  1  8 3.4713   251
  3  2  1 26 -1  0 -1  1  1  1  8 3.4713   251
  4  2  1 26  1 -1  0  2  1  1  8 3.4713   251
  1  2  1  8  1  0  1  3  2  1 26 3.4713   252
  2  2  1  8 -1  1  0  4  2  1 26 3.4713   252
  2  2  1 26 -1  1  0  4  2  1  8 3.4713   252
  3  2  1 26 -1  0 -1  1  2  1  8 3.4713   252
  4  2  1  8  1 -1  0  2  2  1 26 3.4713   252
  4  2  1 26  1 -1  0  2  2  1  8 3.4713   252
  3  1  1  8 -1  0 -1  1  2  1 26 3.4713   250
  4  1  1  8  1 -1  0  2  2  1 26 3.4713   250
  1  2  1 26  1  0  1  3  1  1  8 3.4713   251
  1  2  1 26  1  0  1  3  2  1  8 3.4713   252
  3  2  1  8 -1  0 -1  1  2  1 26 3.4713   252
  1  2  1 20  1 -1  0  2  2  1 27 3.4761   252
  2  2  1 27 -1  1  0  1  2  1 20 3.4761   252
  3  2  1 20 -1  1  0  4  2  1 27 3.4761   252
  4  2  1 27  1 -1  0  3  2  1 20 3.4761   252
  1  2  1 27  1  0  0  2  2  1 20 3.4761   252
  2  2  1 20 -1  0  0  1  2  1 27 3.4761   252
  3  2  1 27 -1  0  0  4  2  1 20 3.4761   252
  4  2  1 20  1  0  0  3  2  1 27 3.4761   252
  2  1  1 10 -1  1  0  4  1  1  4 3.4865   257
  4  1  1  4  1 -1  0  2  1  1 10 3.4865   257
  4  1  1  4  1 -1  0  2  2  1 10 3.4865   258
  2  2  1 10 -1  1  0  4  1  1  4 3.4865   259
  2  2  1 10 -1  1  0  4  2  1  4 3.4865   260
  4  2  1  4  1 -1  0  2  2  1 10 3.4865   260
  1  1  1 10  1  0  1  3  2  1  4 3.4865   258
  2  1  1 10 -1  1  0  4  2  1  4 3.4865   258
  3  2  1  4 -1  0 -1  1  1  1 10 3.4865   259
  4  2  1  4  1 -1  0  2  1  1 10 3.4865   259
  1  2  1 10  1  0  1  3  2  1  4 3.4865   260
  2  2  1  4 -1  1  0  4  2  1 10 3.4865   260
  3  2  1  4 -1  0 -1  1  2  1 10 3.4865   260
  4  2  1 10  1 -1  0  2  2  1  4 3.4865   260
  1  1  1  4  1  0  1  3  1  1 10 3.4865   257
  1  1  1 10  1  0  1  3  1  1  4 3.4865   257
  3  1  1  4 -1  0 -1  1  1  1 10 3.4865   257
  3  1  1 10 -1  0 -1  1  1  1  4 3.4865   257
  1  1  1  4  1  0  1  3  2  1 10 3.4865   258
  2  1  1  4 -1  1  0  4  2  1 10 3.4865   258
  3  1  1  4 -1  0 -1  1  2  1 10 3.4865   258
  3  1  1 10 -1  0 -1  1  2  1  4 3.4865   258
  4  1  1 10  1 -1  0  2  2  1  4 3.4865   258
  1  2  1  4  1  0  1  3  1  1 10 3.4865   259
  1  2  1 10  1  0  1  3  1  1  4 3.4865   259
  2  2  1  4 -1  1  0  4  1  1 10 3.4865   259
  3  2  1 10 -1  0 -1  1  1  1  4 3.4865   259
  4  2  1 10  1 -1  0  2  1  1  4 3.4865   259
  1  2  1  4  1  0  1  3  2  1 10 3.4865   260
  3  2  1 10 -1  0 -1  1  2  1  4 3.4865   260
  2  1  1  4 -1  1  0  4  1  1 10 3.4865   257
  4  1  1 10  1 -1  0  2  1  1  4 3.4865   257
  1  1  1  8  1  0  1  3  2  1 28 3.4891   258
  3  2  1 28 -1  0 -1  1  1  1  8 3.4891   259
  1  2  1  8  1  0  1  3  2  1 28 3.4891   260
  2  2  1  8 -1  1  0  4  2  1 28 3.4891   260
  2  2  1 28 -1  1  0  4  2  1  8 3.4891   260
  3  2  1 28 -1  0 -1  1  2  1  8 3.4891   260
  4  2  1  8  1 -1  0  2  2  1 28 3.4891   260
  4  2  1 28  1 -1  0  2  2  1  8 3.4891   260
  2  1  1  8 -1  1  0  4  2  1 28 3.4891   258
  4  1  1  8  1 -1  0  2  2  1 28 3.4891   258
  2  2  1 28 -1  1  0  4  1  1  8 3.4891   259
  4  2  1 28  1 -1  0  2  1  1  8 3.4891   259
  1  2  1 28  1  0  1  3  2  1  8 3.4891   260
  3  2  1  8 -1  0 -1  1  2  1 28 3.4891   260
  3  1  1  8 -1  0 -1  1  2  1 28 3.4892   258
  1  2  1 28  1  0  1  3  1  1  8 3.4892   259
  2  1  1 12 -1  1  0  4  1  1 23 3.4917   261
  4  1  1 23  1 -1  0  2  1  1 12 3.4917   261
  4  1  1 23  1 -1  0  2  2  1 12 3.4917   262
  2  2  1 12 -1  1  0  4  1  1 23 3.4917   263
  2  1  1 12 -1  1  0  4  2  1 23 3.4917   262
  4  2  1 23  1 -1  0  2  1  1 12 3.4917   263
  2  2  1 12 -1  1  0  4  2  1 23 3.4917   264
  4  2  1 23  1 -1  0  2  2  1 12 3.4917   264
  1  1  1 12  1  0  1  3  2  1 23 3.4917   262
  3  2  1 23 -1  0 -1  1  1  1 12 3.4917   263
  1  2  1 12  1  0  1  3  2  1 23 3.4917   264
  2  2  1 23 -1  1  0  4  2  1 12 3.4917   264
  3  2  1 23 -1  0 -1  1  2  1 12 3.4917   264
  4  2  1 12  1 -1  0  2  2  1 23 3.4917   264
  1  1  1 12  1  0  1  3  1  1 23 3.4917   261
  3  1  1 23 -1  0 -1  1  1  1 12 3.4917   261
  3  1  1 23 -1  0 -1  1  2  1 12 3.4917   262
  1  2  1 12  1  0  1  3  1  1 23 3.4917   263
  1  1  1 23  1  0  1  3  1  1 12 3.4917   261
  3  1  1 12 -1  0 -1  1  1  1 23 3.4917   261
  1  1  1 23  1  0  1  3  2  1 12 3.4917   262
  2  1  1 23 -1  1  0  4  2  1 12 3.4917   262
  3  1  1 12 -1  0 -1  1  2  1 23 3.4917   262
  4  1  1 12  1 -1  0  2  2  1 23 3.4917   262
  1  2  1 23  1  0  1  3  1  1 12 3.4917   263
  2  2  1 23 -1  1  0  4  1  1 12 3.4917   263
  3  2  1 12 -1  0 -1  1  1  1 23 3.4917   263
  4  2  1 12  1 -1  0  2  1  1 23 3.4917   263
  1  2  1 23  1  0  1  3  2  1 12 3.4917   264
  3  2  1 12 -1  0 -1  1  2  1 23 3.4917   264
  2  1  1 23 -1  1  0  4  1  1 12 3.4917   261
  4  1  1 12  1 -1  0  2  1  1 23 3.4917   261
  2  1  1  8 -1  1  0  4  1  1  2 3.4951   261
  4  1  1  2  1 -1  0  2  1  1  8 3.4951   261
  4  1  1  2  1 -1  0  2  2  1  8 3.4951   262
  4  1  1  8  1 -1  0  2  2  1  2 3.4951   262
  2  2  1  2 -1  1  0  4  1  1  8 3.4951   263
  2  2  1  8 -1  1  0  4  1  1  2 3.4951   263
  2  2  1  2 -1  1  0  4  2  1  8 3.4951   264
  2  2  1  8 -1  1  0  4  2  1  2 3.4951   264
  4  2  1  2  1 -1  0  2  2  1  8 3.4951   264
  4  2  1  8  1 -1  0  2  2  1  2 3.4951   264
  2  1  1  2 -1  1  0  4  1  1  8 3.4951   261
  3  1  1  8 -1  0 -1  1  1  1  2 3.4951   261
  4  1  1  8  1 -1  0  2  1  1  2 3.4951   261
  1  1  1  2  1  0  1  3  2  1  8 3.4951   262
  1  1  1  8  1  0  1  3  2  1  2 3.4951   262
  2  1  1  2 -1  1  0  4  2  1  8 3.4951   262
  2  1  1  8 -1  1  0  4  2  1  2 3.4951   262
  3  1  1  8 -1  0 -1  1  2  1  2 3.4951   262
  1  2  1  2  1  0  1  3  1  1  8 3.4951   263
  3  2  1  2 -1  0 -1  1  1  1  8 3.4951   263
  3  2  1  8 -1  0 -1  1  1  1  2 3.4951   263
  4  2  1  2  1 -1  0  2  1  1  8 3.4951   263
  4  2  1  8  1 -1  0  2  1  1  2 3.4951   263
  1  2  1  2  1  0  1  3  2  1  8 3.4951   264
  1  2  1  8  1  0  1  3  2  1  2 3.4951   264
  3  2  1  2 -1  0 -1  1  2  1  8 3.4951   264
  3  2  1  8 -1  0 -1  1  2  1  2 3.4951   264
  1  1  1  2  1  0  1  3  1  1  8 3.4952   261
  1  1  1  8  1  0  1  3  1  1  2 3.4952   261
  3  1  1  2 -1  0 -1  1  1  1  8 3.4952   261
  3  1  1  2 -1  0 -1  1  2  1  8 3.4952   262
  1  2  1  8  1  0  1  3  1  1  2 3.4952   263
  3  1  1 18  0  0  0  4  1  1 20 3.4960   261
  4  1  1 20  0  0  0  3  1  1 18 3.4960   261
  1  1  1 18  0  0  0  2  1  1 20 3.4960   261
  1  1  1 20  0 -1  0  2  1  1 18 3.4960   261
  2  1  1 18  0  1  0  1  1  1 20 3.4960   261
  2  1  1 20  0  0  0  1  1  1 18 3.4960   261
  1  1  1 20  0 -1  0  2  2  1 18 3.4960   262
  2  1  1 20  0  0  0  1  2  1 18 3.4960   262
  3  1  1 20  0  1  0  4  2  1 18 3.4960   262
  4  1  1 20  0  0  0  3  2  1 18 3.4960   262
  1  2  1 18  0  0  0  2  1  1 20 3.4960   263
  2  2  1 18  0  1  0  1  1  1 20 3.4960   263
  3  2  1 18  0  0  0  4  1  1 20 3.4960   263
  4  2  1 18  0 -1  0  3  1  1 20 3.4960   263
  3  1  1 20  0  1  0  4  1  1 18 3.4960   261
  4  1  1 18  0 -1  0  3  1  1 20 3.4960   261
  3  1  1 19 -1  0  0  4  1  1 20 3.4983   265
  4  1  1 20  1  0  0  3  1  1 19 3.4983   265
  1  1  1 20  1 -1  0  2  1  1 19 3.4984   265
  2  1  1 19 -1  1  0  1  1  1 20 3.4984   265
  3  1  1 20 -1  1  0  4  1  1 19 3.4984   265
  4  1  1 19  1 -1  0  3  1  1 20 3.4984   265
  1  1  1 20  1 -1  0  2  2  1 19 3.4984   266
  3  1  1 20 -1  1  0  4  2  1 19 3.4984   266
  4  1  1 20  1  0  0  3  2  1 19 3.4984   266
  2  2  1 19 -1  1  0  1  1  1 20 3.4984   267
  3  2  1 19 -1  0  0  4  1  1 20 3.4984   267
  4  2  1 19  1 -1  0  3  1  1 20 3.4984   267
  1  1  1 19  1  0  0  2  1  1 20 3.4984   265
  2  1  1 20 -1  0  0  1  1  1 19 3.4984   265
  2  1  1 20 -1  0  0  1  2  1 19 3.4984   266
  1  2  1 19  1  0  0  2  1  1 20 3.4984   267
  1  1  1 25  0  0  1  4  1  1 12 3.5027   265
  4  1  1 12  0  0 -1  1  1  1 25 3.5027   265
  1  1  1 12  0  0  0  4  2  1 25 3.5027   266
  4  1  1 12  0  0 -1  1  2  1 25 3.5027   266
  1  2  1 25  0  0  1  4  1  1 12 3.5027   267
  4  2  1 25  0  0  0  1  1  1 12 3.5027   267
  1  2  1 12  0  0  0  4  2  1 25 3.5027   268
  4  2  1 25  0  0  0  1  2  1 12 3.5027   268
  1  1  1 12  0  0  0  4  1  1 25 3.5027   265
  2  1  1 25  0  0  0  3  1  1 12 3.5027   265
  3  1  1 12  0  0  0  2  1  1 25 3.5027   265
  4  1  1 25  0  0  0  1  1  1 12 3.5027   265
  2  1  1 25  0  0  0  3  2  1 12 3.5027   266
  3  1  1 12  0  0  0  2  2  1 25 3.5027   266
  4  1  1 25  0  0  0  1  2  1 12 3.5027   266
  1  2  1 12  0  0  0  4  1  1 25 3.5027   267
  2  2  1 25  0  0  0  3  1  1 12 3.5027   267
  3  2  1 12  0  0  0  2  1  1 25 3.5027   267
  2  2  1 25  0  0  0  3  2  1 12 3.5027   268
  3  2  1 12  0  0  0  2  2  1 25 3.5027   268
  2  1  1 12  0  0  1  3  1  1 25 3.5027   265
  3  1  1 25  0  0 -1  2  1  1 12 3.5027   265
  1  1  1 25  0  0  1  4  2  1 12 3.5027   266
  2  1  1 12  0  0  1  3  2  1 25 3.5027   266
  3  1  1 25  0  0 -1  2  2  1 12 3.5027   266
  2  2  1 12  0  0  1  3  1  1 25 3.5027   267
  3  2  1 25  0  0 -1  2  1  1 12 3.5027   267
  4  2  1 12  0  0 -1  1  1  1 25 3.5027   267
  1  2  1 25  0  0  1  4  2  1 12 3.5027   268
  2  2  1 12  0  0  1  3  2  1 25 3.5027   268
  3  2  1 25  0  0 -1  2  2  1 12 3.5027   268
  4  2  1 12  0  0 -1  1  2  1 25 3.5027   268
  3  1  1 21 -1  0  0  4  1  1 16 3.5051   269
  4  1  1 16  1  0  0  3  1  1 21 3.5051   269
  1  1  1 16  1 -1  0  2  1  1 21 3.5051   269
  2  1  1 21 -1  1  0  1  1  1 16 3.5051   269
  2  1  1 21 -1  1  0  1  2  1 16 3.5051   270
  4  1  1 21  1 -1  0  3  2  1 16 3.5051   270
  1  2  1 16  1 -1  0  2  1  1 21 3.5051   271
  3  2  1 16 -1  1  0  4  1  1 21 3.5051   271
  1  1  1 21  1  0  0  2  1  1 16 3.5052   269
  2  1  1 16 -1  0  0  1  1  1 21 3.5052   269
  3  1  1 16 -1  1  0  4  1  1 21 3.5052   269
  4  1  1 21  1 -1  0  3  1  1 16 3.5052   269
  1  1  1 21  1  0  0  2  2  1 16 3.5052   270
  3  1  1 21 -1  0  0  4  2  1 16 3.5052   270
  2  2  1 16 -1  0  0  1  1  1 21 3.5052   271
  4  2  1 16  1  0  0  3  1  1 21 3.5052   271
  2  1  1  5 -1  0  0  2  1  1 26 3.5055   269
  2  1  1 26  1  0  0  2  1  1  5 3.5055   269
  1  1  1  5  1  0  0  1  1  1 26 3.5055   269
  1  1  1 26 -1  0  0  1  1  1  5 3.5055   269
  3  1  1  5 -1  0  0  3  1  1 26 3.5055   269
  3  1  1 26  1  0  0  3  1  1  5 3.5055   269
  2  1  1 26  1  0  0  2  2  1  5 3.5055   270
  2  2  1  5 -1  0  0  2  1  1 26 3.5055   271
  1  1  1 26 -1  0  0  1  2  1  5 3.5055   270
  1  2  1  5  1  0  0  1  1  1 26 3.5055   271
  3  1  1 26  1  0  0  3  2  1  5 3.5055   270
  3  2  1  5 -1  0  0  3  1  1 26 3.5055   271
  4  1  1  5  1  0  0  4  1  1 26 3.5055   269
  4  1  1 26 -1  0  0  4  1  1  5 3.5055   269
  4  1  1 26 -1  0  0  4  2  1  5 3.5055   270
  4  2  1  5  1  0  0  4  1  1 26 3.5055   271
  1  1  1 19  1  0  0  2  1  1  2 3.5101   273
  2  1  1  2 -1  0  0  1  1  1 19 3.5101   273
  2  1  1  2 -1  0  0  1  2  1 19 3.5101   274
  1  2  1 19  1  0  0  2  1  1  2 3.5101   275
  3  2  1 19 -1  0  0  4  2  1  2 3.5101   276
  4  2  1  2  1  0  0  3  2  1 19 3.5101   276
  1  1  1  2  1 -1  0  2  1  1 19 3.5102   273
  2  1  1 19 -1  1  0  1  1  1  2 3.5102   273
  3  1  1  2 -1  1  0  4  1  1 19 3.5102   273
  3  1  1 19 -1  0  0  4  1  1  2 3.5102   273
  4  1  1  2  1  0  0  3  1  1 19 3.5102   273
  4  1  1 19  1 -1  0  3  1  1  2 3.5102   273
  1  1  1  2  1 -1  0  2  2  1 19 3.5102   274
  1  1  1 19  1  0  0  2  2  1  2 3.5102   274
  2  1  1 19 -1  1  0  1  2  1  2 3.5102   274
  3  1  1  2 -1  1  0  4  2  1 19 3.5102   274
  3  1  1 19 -1  0  0  4  2  1  2 3.5102   274
  4  1  1  2  1  0  0  3  2  1 19 3.5102   274
  4  1  1 19  1 -1  0  3  2  1  2 3.5102   274
  1  2  1  2  1 -1  0  2  1  1 19 3.5102   275
  2  2  1  2 -1  0  0  1  1  1 19 3.5102   275
  2  2  1 19 -1  1  0  1  1  1  2 3.5102   275
  3  2  1  2 -1  1  0  4  1  1 19 3.5102   275
  3  2  1 19 -1  0  0  4  1  1  2 3.5102   275
  4  2  1  2  1  0  0  3  1  1 19 3.5102   275
  4  2  1 19  1 -1  0  3  1  1  2 3.5102   275
  1  2  1  2  1 -1  0  2  2  1 19 3.5102   276
  1  2  1 19  1  0  0  2  2  1  2 3.5102   276
  2  2  1  2 -1  0  0  1  2  1 19 3.5102   276
  2  2  1 19 -1  1  0  1  2  1  2 3.5102   276
  3  2  1  2 -1  1  0  4  2  1 19 3.5102   276
  4  2  1 19  1 -1  0  3  2  1  2 3.5102   276
  1  1  1  7  1 -1  0  2  1  1 19 3.5380   281
  1  1  1 19  1  0  0  2  1  1  7 3.5380   281
  2  1  1  7 -1  0  0  1  1  1 19 3.5380   281
  2  1  1 19 -1  1  0  1  1  1  7 3.5380   281
  3  1  1  7 -1  1  0  4  1  1 19 3.5380   281
  3  1  1 19 -1  0  0  4  1  1  7 3.5380   281
  4  1  1  7  1  0  0  3  1  1 19 3.5380   281
  4  1  1 19  1 -1  0  3  1  1  7 3.5380   281
  1  1  1  7  1 -1  0  2  2  1 19 3.5380   282
  2  1  1  7 -1  0  0  1  2  1 19 3.5380   282
  2  1  1 19 -1  1  0  1  2  1  7 3.5380   282
  3  1  1  7 -1  1  0  4  2  1 19 3.5380   282
  3  1  1 19 -1  0  0  4  2  1  7 3.5380   282
  4  1  1 19  1 -1  0  3  2  1  7 3.5380   282
  1  2  1  7  1 -1  0  2  1  1 19 3.5380   283
  1  2  1 19  1  0  0  2  1  1  7 3.5380   283
  2  2  1 19 -1  1  0  1  1  1  7 3.5380   283
  3  2  1  7 -1  1  0  4  1  1 19 3.5380   283
  4  2  1  7  1  0  0  3  1  1 19 3.5380   283
  4  2  1 19  1 -1  0  3  1  1  7 3.5380   283
  1  2  1  7  1 -1  0  2  2  1 19 3.5380   284
  2  2  1 19 -1  1  0  1  2  1  7 3.5380   284
  4  2  1 19  1 -1  0  3  2  1  7 3.5380   284
  1  1  1 19  1  0  0  2  2  1  7 3.5380   282
  2  2  1  7 -1  0  0  1  1  1 19 3.5380   283
  1  2  1 19  1  0  0  2  2  1  7 3.5380   284
  2  2  1  7 -1  0  0  1  2  1 19 3.5380   284
  3  2  1  7 -1  1  0  4  2  1 19 3.5380   284
  4  1  1  7  1  0  0  3  2  1 19 3.5381   282
  3  2  1 19 -1  0  0  4  1  1  7 3.5381   283
  3  2  1 19 -1  0  0  4  2  1  7 3.5381   284
  4  2  1  7  1  0  0  3  2  1 19 3.5381   284
  1  1  1 13  0  0  0  2  2  1 16 3.5508   286
  2  2  1 16  0  0  0  1  1  1 13 3.5508   287
  1  2  1 13  0  0  0  2  2  1 16 3.5508   288
  2  2  1 16  0  0  0  1  2  1 13 3.5508   288
  1  1  1 13  0  0  0  2  1  1 16 3.5508   285
  1  1  1 16  0 -1  0  2  1  1 13 3.5508   285
  2  1  1 13  0  1  0  1  1  1 16 3.5508   285
  2  1  1 16  0  0  0  1  1  1 13 3.5508   285
  3  1  1 13  0  0  0  4  1  1 16 3.5508   285
  4  1  1 16  0  0  0  3  1  1 13 3.5508   285
  1  1  1 16  0 -1  0  2  2  1 13 3.5508   286
  2  1  1 13  0  1  0  1  2  1 16 3.5508   286
  2  1  1 16  0  0  0  1  2  1 13 3.5508   286
  3  1  1 13  0  0  0  4  2  1 16 3.5508   286
  3  1  1 16  0  1  0  4  2  1 13 3.5508   286
  4  1  1 16  0  0  0  3  2  1 13 3.5508   286
  1  2  1 13  0  0  0  2  1  1 16 3.5508   287
  1  2  1 16  0 -1  0  2  1  1 13 3.5508   287
  2  2  1 13  0  1  0  1  1  1 16 3.5508   287
  3  2  1 13  0  0  0  4  1  1 16 3.5508   287
  4  2  1 13  0 -1  0  3  1  1 16 3.5508   287
  4  2  1 16  0  0  0  3  1  1 13 3.5508   287
  1  2  1 16  0 -1  0  2  2  1 13 3.5508   288
  2  2  1 13  0  1  0  1  2  1 16 3.5508   288
  3  2  1 13  0  0  0  4  2  1 16 3.5508   288
  3  2  1 16  0  1  0  4  2  1 13 3.5508   288
  4  2  1 13  0 -1  0  3  2  1 16 3.5508   288
  4  2  1 16  0  0  0  3  2  1 13 3.5508   288
  3  1  1 16  0  1  0  4  1  1 13 3.5508   285
  4  1  1 13  0 -1  0  3  1  1 16 3.5508   285
  4  1  1 13  0 -1  0  3  2  1 16 3.5508   286
  3  2  1 16  0  1  0  4  1  1 13 3.5508   287
  3  1  1 21 -1  0  0  4  1  1 11 3.5538   289
  4  1  1 11  1  0  0  3  1  1 21 3.5538   289
  1  1  1 11  1 -1  0  2  1  1 21 3.5538   289
  1  1  1 21  1  0  0  2  1  1 11 3.5538   289
  2  1  1 11 -1  0  0  1  1  1 21 3.5538   289
  2  1  1 21 -1  1  0  1  1  1 11 3.5538   289
  3  1  1 11 -1  1  0  4  1  1 21 3.5538   289
  4  1  1 21  1 -1  0  3  1  1 11 3.5538   289
  1  1  1 21  1  0  0  2  2  1 11 3.5538   290
  2  1  1 21 -1  1  0  1  2  1 11 3.5538   290
  3  1  1 21 -1  0  0  4  2  1 11 3.5538   290
  4  1  1 21  1 -1  0  3  2  1 11 3.5538   290
  1  2  1 11  1 -1  0  2  1  1 21 3.5538   291
  2  2  1 11 -1  0  0  1  1  1 21 3.5538   291
  3  2  1 11 -1  1  0  4  1  1 21 3.5538   291
  4  2  1 11  1  0  0  3  1  1 21 3.5538   291
  2  1  1 19 -1  1  0  1  2  1 20 3.5685   294
  4  1  1 19  1 -1  0  3  2  1 20 3.5685   294
  1  2  1 20  1 -1  0  2  1  1 19 3.5685   295
  3  2  1 20 -1  1  0  4  1  1 19 3.5685   295
  3  2  1 20 -1  1  0  4  2  1 19 3.5685   296
  4  2  1 19  1 -1  0  3  2  1 20 3.5685   296
  1  2  1 20  1 -1  0  2  2  1 19 3.5685   296
  2  2  1 19 -1  1  0  1  2  1 20 3.5685   296
  1  1  1 19  1  0  0  2  2  1 20 3.5685   294
  3  1  1 19 -1  0  0  4  2  1 20 3.5685   294
  2  2  1 20 -1  0  0  1  1  1 19 3.5685   295
  4  2  1 20  1  0  0  3  1  1 19 3.5685   295
  1  2  1 19  1  0  0  2  2  1 20 3.5685   296
  2  2  1 20 -1  0  0  1  2  1 19 3.5685   296
  3  2  1 19 -1  0  0  4  2  1 20 3.5685   296
  4  2  1 20  1  0  0  3  2  1 19 3.5685   296
  4  1  1 24  1 -1  0  2  2  1 14 3.5724   294
  2  2  1 14 -1  1  0  4  1  1 24 3.5724   295
  2  2  1 14 -1  1  0  4  2  1 24 3.5724   296
  4  2  1 24  1 -1  0  2  2  1 14 3.5724   296
  2  1  1 14 -1  1  0  4  1  1 24 3.5724   293
  4  1  1 24  1 -1  0  2  1  1 14 3.5724   293
  2  1  1 14 -1  1  0  4  2  1 24 3.5724   294
  4  1  1 14  1 -1  0  2  2  1 24 3.5724   294
  2  2  1 24 -1  1  0  4  1  1 14 3.5724   295
  4  2  1 24  1 -1  0  2  1  1 14 3.5724   295
  2  2  1 24 -1  1  0  4  2  1 14 3.5724   296
  4  2  1 14  1 -1  0  2  2  1 24 3.5724   296
  1  1  1 14  1  0  1  3  1  1 24 3.5724   293
  3  1  1 24 -1  0 -1  1  1  1 14 3.5724   293
  1  1  1 14  1  0  1  3  2  1 24 3.5724   294
  1  1  1 24  1  0  1  3  2  1 14 3.5724   294
  2  1  1 24 -1  1  0  4  2  1 14 3.5724   294
  3  1  1 24 -1  0 -1  1  2  1 14 3.5724   294
  1  2  1 14  1  0  1  3  1  1 24 3.5724   295
  3  2  1 14 -1  0 -1  1  1  1 24 3.5724   295
  3  2  1 24 -1  0 -1  1  1  1 14 3.5724   295
  4  2  1 14  1 -1  0  2  1  1 24 3.5724   295
  1  2  1 14  1  0  1  3  2  1 24 3.5724   296
  1  2  1 24  1  0  1  3  2  1 14 3.5724   296
  3  2  1 14 -1  0 -1  1  2  1 24 3.5724   296
  3  2  1 24 -1  0 -1  1  2  1 14 3.5724   296
  1  1  1 24  1  0  1  3  1  1 14 3.5724   293
  2  1  1 24 -1  1  0  4  1  1 14 3.5724   293
  3  1  1 14 -1  0 -1  1  1  1 24 3.5724   293
  4  1  1 14  1 -1  0  2  1  1 24 3.5724   293
  3  1  1 14 -1  0 -1  1  2  1 24 3.5724   294
  1  2  1 24  1  0  1  3  1  1 14 3.5724   295
  4  1  1 11  1  0  0  3  2  1 27 3.5791   298
  3  2  1 27 -1  0  0  4  1  1 11 3.5791   299
  1  1  1 11  1 -1  0  2  2  1 27 3.5792   298
  2  1  1 11 -1  0  0  1  2  1 27 3.5792   298
  1  2  1 27  1  0  0  2  1  1 11 3.5792   299
  2  2  1 27 -1  1  0  1  1  1 11 3.5792   299
  1  2  1 11  1 -1  0  2  2  1 27 3.5792   300
  1  2  1 27  1  0  0  2  2  1 11 3.5792   300
  2  2  1 11 -1  0  0  1  2  1 27 3.5792   300
  2  2  1 27 -1  1  0  1  2  1 11 3.5792   300
  3  2  1 11 -1  1  0  4  2  1 27 3.5792   300
  3  2  1 27 -1  0  0  4  2  1 11 3.5792   300
  4  2  1 11  1  0  0  3  2  1 27 3.5792   300
  4  2  1 27  1 -1  0  3  2  1 11 3.5792   300
  3  1  1 11 -1  1  0  4  2  1 27 3.5792   298
  4  2  1 27  1 -1  0  3  1  1 11 3.5792   299
  2  2  1 20 -1  1  0  4  2  1 28 3.5803   300
  4  2  1 28  1 -1  0  2  2  1 20 3.5803   300
  1  2  1 20  1  0  1  3  2  1 28 3.5803   300
  3  2  1 28 -1  0 -1  1  2  1 20 3.5803   300
  2  2  1 28 -1  1  0  4  2  1 20 3.5803   300
  4  2  1 20  1 -1  0  2  2  1 28 3.5803   300
  1  2  1 28  1  0  1  3  2  1 20 3.5803   300
  3  2  1 20 -1  0 -1  1  2  1 28 3.5803   300
  4  2  1  6  1 -1  0  2  2  1 19 3.5820   300
  2  1  1 19 -1  1  0  4  1  1  6 3.5820   297
  4  1  1  6  1 -1  0  2  1  1 19 3.5820   297
  2  1  1 19 -1  1  0  4  2  1  6 3.5820   298
  4  1  1  6  1 -1  0  2  2  1 19 3.5820   298
  2  2  1 19 -1  1  0  4  1  1  6 3.5820   299
  4  2  1  6  1 -1  0  2  1  1 19 3.5820   299
  2  2  1 19 -1  1  0  4  2  1  6 3.5820   300
  1  1  1  6  1  0  1  3  2  1 19 3.5820   298
  1  1  1 19  1  0  1  3  2  1  6 3.5820   298
  4  1  1 19  1 -1  0  2  2  1  6 3.5820   298
  2  2  1  6 -1  1  0  4  1  1 19 3.5820   299
  3  2  1  6 -1  0 -1  1  1  1 19 3.5820   299
  3  2  1 19 -1  0 -1  1  1  1  6 3.5820   299
  1  2  1  6  1  0  1  3  2  1 19 3.5820   300
  1  2  1 19  1  0  1  3  2  1  6 3.5820   300
  2  2  1  6 -1  1  0  4  2  1 19 3.5820   300
  3  2  1  6 -1  0 -1  1  2  1 19 3.5820   300
  3  2  1 19 -1  0 -1  1  2  1  6 3.5820   300
  4  2  1 19  1 -1  0  2  2  1  6 3.5820   300
  1  1  1 19  1  0  1  3  1  1  6 3.5820   297
  2  1  1  6 -1  1  0  4  1  1 19 3.5820   297
  3  1  1  6 -1  0 -1  1  1  1 19 3.5820   297
  4  1  1 19  1 -1  0  2  1  1  6 3.5820   297
  2  1  1  6 -1  1  0  4  2  1 19 3.5820   298
  3  1  1  6 -1  0 -1  1  2  1 19 3.5820   298
  1  2  1 19  1  0  1  3  1  1  6 3.5820   299
  4  2  1 19  1 -1  0  2  1  1  6 3.5820   299
  1  1  1  6  1  0  1  3  1  1 19 3.5820   297
  3  1  1 19 -1  0 -1  1  1  1  6 3.5820   297
  3  1  1 19 -1  0 -1  1  2  1  6 3.5820   298
  1  2  1  6  1  0  1  3  1  1 19 3.5820   299
  4  1  1 16  1  0  0  3  2  1 21 3.5841   298
  3  2  1 21 -1  0  0  4  1  1 16 3.5841   299
  1  1  1 16  1 -1  0  2  2  1 21 3.5841   298
  2  1  1 16 -1  0  0  1  2  1 21 3.5841   298
  1  2  1 21  1  0  0  2  1  1 16 3.5841   299
  2  2  1 21 -1  1  0  1  1  1 16 3.5841   299
  1  2  1 16  1 -1  0  2  2  1 21 3.5841   300
  1  2  1 21  1  0  0  2  2  1 16 3.5841   300
  2  2  1 16 -1  0  0  1  2  1 21 3.5841   300
  2  2  1 21 -1  1  0  1  2  1 16 3.5841   300
  3  2  1 16 -1  1  0  4  2  1 21 3.5841   300
  4  2  1 21  1 -1  0  3  2  1 16 3.5841   300
  3  1  1 16 -1  1  0  4  2  1 21 3.5841   298
  4  2  1 21  1 -1  0  3  1  1 16 3.5841   299
  3  2  1 21 -1  0  0  4  2  1 16 3.5841   300
  4  2  1 16  1  0  0  3  2  1 21 3.5841   300
  2  1  1 24 -1  0  0  4  1  1 20 3.5866   301
  4  1  1 20  1  0  0  2  1  1 24 3.5866   301
  1  1  1 20  1 -1  1  3  1  1 24 3.5867   301
  1  1  1 24  1 -1  1  3  1  1 20 3.5867   301
  3  1  1 20 -1  1 -1  1  1  1 24 3.5867   301
  3  1  1 24 -1  1 -1  1  1  1 20 3.5867   301
  1  1  1 20  1 -1  1  3  2  1 24 3.5867   302
  3  1  1 20 -1  1 -1  1  2  1 24 3.5867   302
  4  1  1 20  1  0  0  2  2  1 24 3.5867   302
  1  2  1 24  1 -1  1  3  1  1 20 3.5867   303
  2  2  1 24 -1  0  0  4  1  1 20 3.5867   303
  3  2  1 24 -1  1 -1  1  1  1 20 3.5867   303
  2  1  1 20 -1  0  0  4  1  1 24 3.5867   301
  4  1  1 24  1  0  0  2  1  1 20 3.5867   301
  2  1  1 20 -1  0  0  4  2  1 24 3.5867   302
  4  2  1 24  1  0  0  2  1  1 20 3.5867   303
  2  1  1 15 -1  0  0  1  2  1 28 3.5886   302
  1  2  1 28  1  0  0  2  1  1 15 3.5886   303
  1  2  1 28  1  0  0  2  2  1 15 3.5886   304
  2  2  1 15 -1  0  0  1  2  1 28 3.5886   304
  1  1  1 15  1 -1  0  2  2  1 28 3.5886   302
  3  1  1 15 -1  1  0  4  2  1 28 3.5886   302
  4  1  1 15  1  0  0  3  2  1 28 3.5886   302
  2  2  1 28 -1  1  0  1  1  1 15 3.5886   303
  3  2  1 28 -1  0  0  4  1  1 15 3.5886   303
  4  2  1 28  1 -1  0  3  1  1 15 3.5886   303
  1  2  1 15  1 -1  0  2  2  1 28 3.5886   304
  2  2  1 28 -1  1  0  1  2  1 15 3.5886   304
  3  2  1 15 -1  1  0  4  2  1 28 3.5886   304
  3  2  1 28 -1  0  0  4  2  1 15 3.5886   304
  4  2  1 15  1  0  0  3  2  1 28 3.5886   304
  4  2  1 28  1 -1  0  3  2  1 15 3.5886   304
  1  1  1 24  1 -1  1  3  2  1 20 3.5918   306
  3  2  1 20 -1  1 -1  1  1  1 24 3.5918   307
  1  2  1 24  1 -1  1  3  2  1 20 3.5918   308
  3  2  1 20 -1  1 -1  1  2  1 24 3.5918   308
  3  1  1 24 -1  1 -1  1  2  1 20 3.5918   306
  1  2  1 20  1 -1  1  3  1  1 24 3.5918   307
  1  2  1 20  1 -1  1  3  2  1 24 3.5918   308
  3  2  1 24 -1  1 -1  1  2  1 20 3.5918   308
  2  1  1 24 -1  0  0  4  2  1 20 3.5918   306
  4  2  1 20  1  0  0  2  1  1 24 3.5918   307
  4  1  1 24  1  0  0  2  2  1 20 3.5919   306
  2  2  1 20 -1  0  0  4  1  1 24 3.5919   307
  2  2  1 20 -1  0  0  4  2  1 24 3.5919   308
  2  2  1 24 -1  0  0  4  2  1 20 3.5919   308
  4  2  1 20  1  0  0  2  2  1 24 3.5919   308
  4  2  1 24  1  0  0  2  2  1 20 3.5919   308
  1  1  1 20  1  0  1  3  2  1 28 3.5980   310
  2  1  1 20 -1  1  0  4  2  1 28 3.5980   310
  3  2  1 28 -1  0 -1  1  1  1 20 3.5980   311
  4  2  1 28  1 -1  0  2  1  1 20 3.5980   311
  3  1  1 20 -1  0 -1  1  2  1 28 3.5981   310
  4  1  1 20  1 -1  0  2  2  1 28 3.5981   310
  1  2  1 28  1  0  1  3  1  1 20 3.5981   311
  2  2  1 28 -1  1  0  4  1  1 20 3.5981   311
  4  1  1 22  1 -1  0  2  2  1 10 3.6032   314
  2  2  1 10 -1  1  0  4  1  1 22 3.6032   315
  2  1  1 10 -1  1  0  4  1  1 22 3.6032   313
  4  1  1 22  1 -1  0  2  1  1 10 3.6032   313
  2  2  1 10 -1  1  0  4  2  1 22 3.6032   316
  4  2  1 22  1 -1  0  2  2  1 10 3.6032   316
  1  1  1 10  1  0  1  3  2  1 22 3.6032   314
  2  1  1 10 -1  1  0  4  2  1 22 3.6032   314
  3  2  1 22 -1  0 -1  1  1  1 10 3.6032   315
  4  2  1 22  1 -1  0  2  1  1 10 3.6032   315
  1  2  1 10  1  0  1  3  2  1 22 3.6032   316
  2  2  1 22 -1  1  0  4  2  1 10 3.6032   316
  3  2  1 22 -1  0 -1  1  2  1 10 3.6032   316
  4  2  1 10  1 -1  0  2  2  1 22 3.6032   316
  1  1  1 10  1  0  1  3  1  1 22 3.6033   313
  1  1  1 22  1  0  1  3  1  1 10 3.6033   313
  3  1  1 10 -1  0 -1  1  1  1 22 3.6033   313
  3  1  1 22 -1  0 -1  1  1  1 10 3.6033   313
  1  1  1 22  1  0  1  3  2  1 10 3.6033   314
  2  1  1 22 -1  1  0  4  2  1 10 3.6033   314
  3  1  1 10 -1  0 -1  1  2  1 22 3.6033   314
  3  1  1 22 -1  0 -1  1  2  1 10 3.6033   314
  4  1  1 10  1 -1  0  2  2  1 22 3.6033   314
  1  2  1 10  1  0  1  3  1  1 22 3.6033   315
  1  2  1 22  1  0  1  3  1  1 10 3.6033   315
  2  2  1 22 -1  1  0  4  1  1 10 3.6033   315
  3  2  1 10 -1  0 -1  1  1  1 22 3.6033   315
  4  2  1 10  1 -1  0  2  1  1 22 3.6033   315
  1  2  1 22  1  0  1  3  2  1 10 3.6033   316
  3  2  1 10 -1  0 -1  1  2  1 22 3.6033   316
  2  1  1 22 -1  1  0  4  1  1 10 3.6033   313
  4  1  1 10  1 -1  0  2  1  1 22 3.6033   313
  1  1  1  4  2  0  1  3  2  1 26 3.6104   318
  2  1  1  4 -2  1  0  4  2  1 26 3.6104   318
  4  1  1  4  2 -1  0  2  2  1 26 3.6104   318
  2  2  1 26 -2  1  0  4  1  1  4 3.6104   319
  3  2  1 26 -2  0 -1  1  1  1  4 3.6104   319
  4  2  1 26  2 -1  0  2  1  1  4 3.6104   319
  1  2  1  4  2  0  1  3  2  1 26 3.6104   320
  1  2  1 26  2  0  1  3  2  1  4 3.6104   320
  2  2  1  4 -2  1  0  4  2  1 26 3.6104   320
  3  2  1  4 -2  0 -1  1  2  1 26 3.6104   320
  3  2  1 26 -2  0 -1  1  2  1  4 3.6104   320
  4  2  1 26  2 -1  0  2  2  1  4 3.6104   320
  3  1  1  4 -2  0 -1  1  2  1 26 3.6104   318
  1  2  1 26  2  0  1  3  1  1  4 3.6104   319
  2  2  1 26 -2  1  0  4  2  1  4 3.6104   320
  4  2  1  4  2 -1  0  2  2  1 26 3.6104   320
  2  2  1 26 -1  1  0  4  2  1  7 3.6153   320
  4  2  1  7  1 -1  0  2  2  1 26 3.6153   320
  1  1  1  7  1  0  1  3  2  1 26 3.6153   318
  4  1  1  7  1 -1  0  2  2  1 26 3.6153   318
  2  2  1 26 -1  1  0  4  1  1  7 3.6153   319
  3  2  1 26 -1  0 -1  1  1  1  7 3.6153   319
  1  2  1  7  1  0  1  3  2  1 26 3.6153   320
  2  2  1  7 -1  1  0  4  2  1 26 3.6153   320
  3  2  1 26 -1  0 -1  1  2  1  7 3.6153   320
  4  2  1 26  1 -1  0  2  2  1  7 3.6153   320
  2  1  1  7 -1  1  0  4  2  1 26 3.6153   318
  3  1  1  7 -1  0 -1  1  2  1 26 3.6153   318
  1  2  1 26  1  0  1  3  1  1  7 3.6153   319
  4  2  1 26  1 -1  0  2  1  1  7 3.6153   319
  1  2  1 26  1  0  1  3  2  1  7 3.6153   320
  3  2  1  7 -1  0 -1  1  2  1 26 3.6153   320
  4  1  1 11  1  0  0  3  2  1 21 3.6208   322
  3  2  1 21 -1  0  0  4  1  1 11 3.6208   323
  1  1  1 11  1 -1  0  2  2  1 21 3.6208   322
  2  2  1 21 -1  1  0  1  1  1 11 3.6208   323
  1  2  1 11  1 -1  0  2  2  1 21 3.6208   324
  2  2  1 21 -1  1  0  1  2  1 11 3.6208   324
  2  1  1 11 -1  0  0  1  2  1 21 3.6208   322
  3  1  1 11 -1  1  0  4  2  1 21 3.6208   322
  1  2  1 21  1  0  0  2  1  1 11 3.6208   323
  4  2  1 21  1 -1  0  3  1  1 11 3.6208   323
  1  2  1 21  1  0  0  2  2  1 11 3.6208   324
  2  2  1 11 -1  0  0  1  2  1 21 3.6208   324
  3  2  1 11 -1  1  0  4  2  1 21 3.6208   324
  3  2  1 21 -1  0  0  4  2  1 11 3.6208   324
  4  2  1 11  1  0  0  3  2  1 21 3.6208   324
  4  2  1 21  1 -1  0  3  2  1 11 3.6208   324
  2  1  1 11  1  0  0  2  1  1 22 3.6224   321
  2  1  1 22 -1  0  0  2  1  1 11 3.6224   321
  2  1  1 22 -1  0  0  2  2  1 11 3.6224   322
  2  2  1 11  1  0  0  2  1  1 22 3.6224   323
  2  1  1 11  1  0  0  2  2  1 22 3.6224   322
  2  2  1 22 -1  0  0  2  1  1 11 3.6224   323
  2  2  1 11  1  0  0  2  2  1 22 3.6224   324
  2  2  1 22 -1  0  0  2  2  1 11 3.6224   324
  1  1  1 11 -1  0  0  1  1  1 22 3.6224   321
  1  1  1 22  1  0  0  1  1  1 11 3.6224   321
  3  1  1 11  1  0  0  3  1  1 22 3.6224   321
  3  1  1 22 -1  0  0  3  1  1 11 3.6224   321
  1  1  1 11 -1  0  0  1  2  1 22 3.6224   322
  1  1  1 22  1  0  0  1  2  1 11 3.6224   322
  3  1  1 22 -1  0  0  3  2  1 11 3.6224   322
  1  2  1 11 -1  0  0  1  1  1 22 3.6224   323
  1  2  1 22  1  0  0  1  1  1 11 3.6224   323
  3  2  1 11  1  0  0  3  1  1 22 3.6224   323
  1  2  1 11 -1  0  0  1  2  1 22 3.6224   324
  1  2  1 22  1  0  0  1  2  1 11 3.6224   324
  4  2  1 11 -1  0  0  4  2  1 22 3.6224   324
  4  2  1 22  1  0  0  4  2  1 11 3.6224   324
  3  1  1 11  1  0  0  3  2  1 22 3.6225   322
  4  1  1 22  1  0  0  4  2  1 11 3.6225   322
  3  2  1 22 -1  0  0  3  1  1 11 3.6225   323
  4  2  1 11 -1  0  0  4  1  1 22 3.6225   323
  2  2  1 21 -1  1  0  4  2  1 25 3.6225   324
  3  2  1 11  1  0  0  3  2  1 22 3.6225   324
  3  2  1 22 -1  0  0  3  2  1 11 3.6225   324
  4  2  1 25  1 -1  0  2  2  1 21 3.6225   324
  4  1  1 11 -1  0  0  4  1  1 22 3.6225   321
  4  1  1 22  1  0  0  4  1  1 11 3.6225   321
  1  1  1 25  1  0  1  3  2  1 21 3.6225   322
  4  1  1 11 -1  0  0  4  2  1 22 3.6225   322
  4  1  1 25  1 -1  0  2  2  1 21 3.6225   322
  2  2  1 21 -1  1  0  4  1  1 25 3.6225   323
  3  2  1 21 -1  0 -1  1  1  1 25 3.6225   323
  4  2  1 22  1  0  0  4  1  1 11 3.6225   323
  1  2  1 25  1  0  1  3  2  1 21 3.6225   324
  2  2  1 25 -1  1  0  4  2  1 21 3.6225   324
  3  2  1 21 -1  0 -1  1  2  1 25 3.6225   324
  4  2  1 21  1 -1  0  2  2  1 25 3.6225   324
  2  1  1 25 -1  1  0  4  2  1 21 3.6225   322
  3  1  1 25 -1  0 -1  1  2  1 21 3.6225   322
  1  2  1 21  1  0  1  3  1  1 25 3.6225   323
  4  2  1 21  1 -1  0  2  1  1 25 3.6225   323
  1  2  1 21  1  0  1  3  2  1 25 3.6225   324
  3  2  1 25 -1  0 -1  1  2  1 21 3.6225   324
  4  1  1  5  1 -1  0  2  2  1 15 3.6239   322
  2  2  1 15 -1  1  0  4  1  1  5 3.6239   323
  2  1  1 15 -1  1  0  4  1  1  5 3.6239   321
  4  1  1  5  1 -1  0  2  1  1 15 3.6239   321
  2  1  1 15 -1  1  0  4  2  1  5 3.6239   322
  4  2  1  5  1 -1  0  2  1  1 15 3.6239   323
  2  2  1 15 -1  1  0  4  2  1  5 3.6239   324
  4  2  1  5  1 -1  0  2  2  1 15 3.6239   324
  1  1  1 15  1  0  1  3  2  1  5 3.6239   322
  4  1  1 15  1 -1  0  2  2  1  5 3.6239   322
  2  2  1  5 -1  1  0  4  1  1 15 3.6239   323
  3  2  1  5 -1  0 -1  1  1  1 15 3.6239   323
  1  2  1 15  1  0  1  3  2  1  5 3.6239   324
  2  2  1  5 -1  1  0  4  2  1 15 3.6239   324
  3  2  1  5 -1  0 -1  1  2  1 15 3.6239   324
  3  2  1 15 -1  0 -1  1  2  1  5 3.6239   324
  4  2  1 15  1 -1  0  2  2  1  5 3.6239   324
  1  1  1  5  1  0  1  3  1  1 15 3.6239   321
  1  1  1 15  1  0  1  3  1  1  5 3.6239   321
  3  1  1  5 -1  0 -1  1  1  1 15 3.6239   321
  3  1  1 15 -1  0 -1  1  1  1  5 3.6239   321
  1  1  1  5  1  0  1  3  2  1 15 3.6239   322
  2  1  1  5 -1  1  0  4  2  1 15 3.6239   322
  3  1  1  5 -1  0 -1  1  2  1 15 3.6239   322
  3  1  1 15 -1  0 -1  1  2  1  5 3.6239   322
  1  2  1  5  1  0  1  3  1  1 15 3.6239   323
  1  2  1 15  1  0  1  3  1  1  5 3.6239   323
  3  2  1 15 -1  0 -1  1  1  1  5 3.6239   323
  4  2  1 15  1 -1  0  2  1  1  5 3.6239   323
  1  2  1  5  1  0  1  3  2  1 15 3.6239   324
  2  1  1  5 -1  1  0  4  1  1 15 3.6239   321
  4  1  1 15  1 -1  0  2  1  1  5 3.6239   321
  2  1  1 13 -1  1  0  4  1  1 23 3.6319   325
  4  1  1 23  1 -1  0  2  1  1 13 3.6319   325
  4  1  1 23  1 -1  0  2  2  1 13 3.6319   326
  2  2  1 13 -1  1  0  4  1  1 23 3.6319   327
  2  1  1 13 -1  1  0  4  2  1 23 3.6319   326
  4  2  1 23  1 -1  0  2  1  1 13 3.6319   327
  2  2  1 13 -1  1  0  4  2  1 23 3.6319   328
  4  2  1 23  1 -1  0  2  2  1 13 3.6319   328
  1  1  1 13  1  0  1  3  2  1 23 3.6319   326
  3  2  1 23 -1  0 -1  1  1  1 13 3.6319   327
  1  2  1 13  1  0  1  3  2  1 23 3.6319   328
  3  2  1 23 -1  0 -1  1  2  1 13 3.6319   328
  1  1  1 23  1  0  1  3  2  1 13 3.6320   326
  3  1  1 23 -1  0 -1  1  2  1 13 3.6320   326
  1  2  1 13  1  0  1  3  1  1 23 3.6320   327
  3  2  1 13 -1  0 -1  1  1  1 23 3.6320   327
  1  2  1 23  1  0  1  3  2  1 13 3.6320   328
  2  2  1 23 -1  1  0  4  2  1 13 3.6320   328
  3  2  1 13 -1  0 -1  1  2  1 23 3.6320   328
  4  2  1 13  1 -1  0  2  2  1 23 3.6320   328
  1  1  1 13  1  0  1  3  1  1 23 3.6320   325
  1  1  1 23  1  0  1  3  1  1 13 3.6320   325
  3  1  1 13 -1  0 -1  1  1  1 23 3.6320   325
  3  1  1 23 -1  0 -1  1  1  1 13 3.6320   325
  2  1  1 23 -1  1  0  4  2  1 13 3.6320   326
  3  1  1 13 -1  0 -1  1  2  1 23 3.6320   326
  4  1  1 13  1 -1  0  2  2  1 23 3.6320   326
  1  2  1 23  1  0  1  3  1  1 13 3.6320   327
  2  2  1 23 -1  1  0  4  1  1 13 3.6320   327
  4  2  1 13  1 -1  0  2  1  1 23 3.6320   327
  2  1  1 23 -1  1  0  4  1  1 13 3.6320   325
  4  1  1 13  1 -1  0  2  1  1 23 3.6320   325
  3  1  1 12  0  0  0  4  1  1 27 3.6323   325
  4  1  1 27  0  0  0  3  1  1 12 3.6323   325
  3  1  1 27  0  1  0  4  2  1 12 3.6323   326
  4  2  1 12  0 -1  0  3  1  1 27 3.6323   327
  1  1  1 12  0  0  0  2  1  1 27 3.6323   325
  1  1  1 27  0 -1  0  2  1  1 12 3.6323   325
  2  1  1 12  0  1  0  1  1  1 27 3.6323   325
  2  1  1 27  0  0  0  1  1  1 12 3.6323   325
  3  1  1 27  0  1  0  4  1  1 12 3.6323   325
  4  1  1 12  0 -1  0  3  1  1 27 3.6323   325
  1  1  1 27  0 -1  0  2  2  1 12 3.6323   326
  2  1  1 27  0  0  0  1  2  1 12 3.6323   326
  4  1  1 27  0  0  0  3  2  1 12 3.6323   326
  1  2  1 12  0  0  0  2  1  1 27 3.6323   327
  2  2  1 12  0  1  0  1  1  1 27 3.6323   327
  3  2  1 12  0  0  0  4  1  1 27 3.6323   327
  1  1  1 28  0  0  1  4  1  1 11 3.6348   325
  2  1  1 28  0  0  0  3  1  1 11 3.6348   325
  3  1  1 11  0  0  0  2  1  1 28 3.6348   325
  4  1  1 11  0  0 -1  1  1  1 28 3.6348   325
  2  1  1 28  0  0  0  3  2  1 11 3.6348   326
  3  2  1 11  0  0  0  2  1  1 28 3.6348   327
  1  1  1 11  0  0  0  4  1  1 28 3.6348   325
  4  1  1 28  0  0  0  1  1  1 11 3.6348   325
  1  1  1 28  0  0  1  4  2  1 11 3.6348   326
  4  1  1 28  0  0  0  1  2  1 11 3.6348   326
  1  2  1 11  0  0  0  4  1  1 28 3.6348   327
  4  2  1 11  0  0 -1  1  1  1 28 3.6348   327
  2  1  1  4 -1  0  0  2  1  1 16 3.6348   325
  2  1  1 11  0  0  1  3  1  1 28 3.6348   325
  2  1  1 16  1  0  0  2  1  1  4 3.6348   325
  3  1  1 28  0  0 -1  2  1  1 11 3.6348   325
  2  1  1  4 -1  0  0  2  2  1 16 3.6348   326
  3  1  1 28  0  0 -1  2  2  1 11 3.6348   326
  2  2  1 11  0  0  1  3  1  1 28 3.6348   327
  2  2  1 16  1  0  0  2  1  1  4 3.6348   327
  3  1  1 16  1  0  0  3  1  1  4 3.6348   325
  2  1  1 16  1  0  0  2  2  1  4 3.6348   326
  2  2  1  4 -1  0  0  2  1  1 16 3.6348   327
  2  2  1  4 -1  0  0  2  2  1 16 3.6348   328
  2  2  1 16  1  0  0  2  2  1  4 3.6348   328
  1  1  1  4  1  0  0  1  1  1 16 3.6348   325
  1  1  1 16 -1  0  0  1  1  1  4 3.6348   325
  3  1  1  4 -1  0  0  3  1  1 16 3.6348   325
  1  1  1  4  1  0  0  1  2  1 16 3.6348   326
  1  1  1 16 -1  0  0  1  2  1  4 3.6348   326
  3  1  1  4 -1  0  0  3  2  1 16 3.6348   326
  1  2  1  4  1  0  0  1  1  1 16 3.6348   327
  1  2  1 16 -1  0  0  1  1  1  4 3.6348   327
  3  2  1 16  1  0  0  3  1  1  4 3.6348   327
  1  2  1  4  1  0  0  1  2  1 16 3.6348   328
  1  2  1 16 -1  0  0  1  2  1  4 3.6348   328
  3  1  1 16  1  0  0  3  2  1  4 3.6348   326
  4  1  1  4  1  0  0  4  2  1 16 3.6348   326
  3  2  1  4 -1  0  0  3  1  1 16 3.6348   327
  4  2  1 16 -1  0  0  4  1  1  4 3.6348   327
  4  2  1  4  1  0  0  4  2  1 16 3.6348   328
  4  2  1 16 -1  0  0  4  2  1  4 3.6348   328
  3  2  1  4 -1  0  0  3  2  1 16 3.6349   328
  3  2  1 16  1  0  0  3  2  1  4 3.6349   328
  4  1  1  4  1  0  0  4  1  1 16 3.6349   325
  4  1  1 16 -1  0  0  4  1  1  4 3.6349   325
  4  1  1 16 -1  0  0  4  2  1  4 3.6349   326
  4  2  1  4  1  0  0  4  1  1 16 3.6349   327
  2  2  1  9 -1  1  0  4  1  1 22 3.6382   331
  2  1  1  9 -1  1  0  4  1  1 22 3.6382   329
  4  1  1 22  1 -1  0  2  1  1  9 3.6382   329
  4  1  1 22  1 -1  0  2  2  1  9 3.6382   330
  2  2  1  9 -1  1  0  4  2  1 22 3.6382   332
  4  2  1 22  1 -1  0  2  2  1  9 3.6382   332
  1  1  1  9  1  0  1  3  2  1 22 3.6382   330
  2  1  1  9 -1  1  0  4  2  1 22 3.6382   330
  3  2  1 22 -1  0 -1  1  1  1  9 3.6382   331
  4  2  1 22  1 -1  0  2  1  1  9 3.6382   331
  1  2  1  9  1  0  1  3  2  1 22 3.6382   332
  2  2  1 22 -1  1  0  4  2  1  9 3.6382   332
  3  2  1 22 -1  0 -1  1  2  1  9 3.6382   332
  4  2  1  9  1 -1  0  2  2  1 22 3.6382   332
  1  1  1  9  1  0  1  3  1  1 22 3.6382   329
  1  1  1 22  1  0  1  3  1  1  9 3.6382   329
  3  1  1  9 -1  0 -1  1  1  1 22 3.6382   329
  3  1  1 22 -1  0 -1  1  1  1  9 3.6382   329
  1  1  1 22  1  0  1  3  2  1  9 3.6382   330
  2  1  1 22 -1  1  0  4  2  1  9 3.6382   330
  3  1  1  9 -1  0 -1  1  2  1 22 3.6382   330
  3  1  1 22 -1  0 -1  1  2  1  9 3.6382   330
  4  1  1  9  1 -1  0  2  2  1 22 3.6382   330
  1  2  1  9  1  0  1  3  1  1 22 3.6382   331
  1  2  1 22  1  0  1  3  1  1  9 3.6382   331
  2  2  1 22 -1  1  0  4  1  1  9 3.6382   331
  3  2  1  9 -1  0 -1  1  1  1 22 3.6382   331
  4  2  1  9  1 -1  0  2  1  1 22 3.6382   331
  1  2  1 22  1  0  1  3  2  1  9 3.6382   332
  3  2  1  9 -1  0 -1  1  2  1 22 3.6382   332
  2  1  1 22 -1  1  0  4  1  1  9 3.6382   329
  4  1  1  9  1 -1  0  2  1  1 22 3.6382   329
  4  1  1 21  1 -1  0  2  2  1 25 3.6393   330
  2  2  1 25 -1  1  0  4  1  1 21 3.6393   331
  2  1  1 25 -1  1  0  4  1  1 21 3.6393   329
  4  1  1 21  1 -1  0  2  1  1 25 3.6393   329
  4  2  1 25  1 -1  0  2  1  1 21 3.6393   331
  1  1  1 21  1  0  1  3  1  1 25 3.6393   329
  3  1  1 25 -1  0 -1  1  1  1 21 3.6393   329
  1  1  1 21  1  0  1  3  2  1 25 3.6393   330
  2  1  1 21 -1  1  0  4  2  1 25 3.6393   330
  3  2  1 25 -1  0 -1  1  1  1 21 3.6393   331
  1  1  1 25  1  0  1  3  1  1 21 3.6394   329
  2  1  1 21 -1  1  0  4  1  1 25 3.6394   329
  3  1  1 21 -1  0 -1  1  1  1 25 3.6394   329
  4  1  1 25  1 -1  0  2  1  1 21 3.6394   329
  3  1  1 21 -1  0 -1  1  2  1 25 3.6394   330
  1  2  1 25  1  0  1  3  1  1 21 3.6394   331
  2  1  1 11 -1  1  0  4  1  1 23 3.6422   329
  4  1  1 23  1 -1  0  2  1  1 11 3.6422   329
  4  1  1 23  1 -1  0  2  2  1 11 3.6422   330
  2  2  1 11 -1  1  0  4  1  1 23 3.6422   331
  2  1  1 11 -1  1  0  4  2  1 23 3.6422   330
  4  2  1 23  1 -1  0  2  1  1 11 3.6422   331
  1  1  1 11  1  0  1  3  2  1 23 3.6422   330
  3  2  1 23 -1  0 -1  1  1  1 11 3.6422   331
  1  2  1 11  1  0  1  3  2  1 23 3.6422   332
  2  2  1 11 -1  1  0  4  2  1 23 3.6422   332
  2  2  1 23 -1  1  0  4  2  1 11 3.6422   332
  3  2  1 23 -1  0 -1  1  2  1 11 3.6422   332
  4  2  1 11  1 -1  0  2  2  1 23 3.6422   332
  4  2  1 23  1 -1  0  2  2  1 11 3.6422   332
  1  1  1 11  1  0  1  3  1  1 23 3.6422   329
  1  1  1 23  1  0  1  3  1  1 11 3.6422   329
  3  1  1 11 -1  0 -1  1  1  1 23 3.6422   329
  3  1  1 23 -1  0 -1  1  1  1 11 3.6422   329
  1  1  1 23  1  0  1  3  2  1 11 3.6422   330
  2  1  1 23 -1  1  0  4  2  1 11 3.6422   330
  3  1  1 11 -1  0 -1  1  2  1 23 3.6422   330
  3  1  1 23 -1  0 -1  1  2  1 11 3.6422   330
  4  1  1 11  1 -1  0  2  2  1 23 3.6422   330
  1  2  1 11  1  0  1  3  1  1 23 3.6422   331
  1  2  1 23  1  0  1  3  1  1 11 3.6422   331
  2  2  1 23 -1  1  0  4  1  1 11 3.6422   331
  3  2  1 11 -1  0 -1  1  1  1 23 3.6422   331
  4  2  1 11  1 -1  0  2  1  1 23 3.6422   331
  1  2  1 23  1  0  1  3  2  1 11 3.6422   332
  3  2  1 11 -1  0 -1  1  2  1 23 3.6422   332
  2  1  1 23 -1  1  0  4  1  1 11 3.6422   333
  4  1  1 11  1 -1  0  2  1  1 23 3.6422   333
  1  1  1  3  1  0  1  3  2  1  3 3.6561   338
  2  1  1  3 -1  1  0  4  2  1  3 3.6561   338
  4  1  1  3  1 -1  0  2  2  1  3 3.6561   338
  2  2  1  3 -1  1  0  4  1  1  3 3.6561   339
  3  2  1  3 -1  0 -1  1  1  1  3 3.6561   339
  4  2  1  3  1 -1  0  2  1  1  3 3.6561   339
  1  2  1  3  1  0  1  3  2  1  3 3.6561   340
  2  2  1  3 -1  1  0  4  2  1  3 3.6561   340
  3  2  1  3 -1  0 -1  1  2  1  3 3.6561   340
  4  2  1  3  1 -1  0  2  2  1  3 3.6561   340
  1  1  1  3  1  0  1  3  1  1  3 3.6561   337
  2  1  1  3 -1  1  0  4  1  1  3 3.6561   337
  3  1  1  3 -1  0 -1  1  1  1  3 3.6561   337
  4  1  1  3  1 -1  0  2  1  1  3 3.6561   337
  3  1  1  3 -1  0 -1  1  2  1  3 3.6561   338
  1  2  1  3  1  0  1  3  1  1  3 3.6561   339
  1  1  1  5  1  0  1  4  1  1 16 3.6634   341
  1  1  1 16 -1  0  0  4  1  1  5 3.6634   341
  2  1  1  5 -1  0  0  3  1  1 16 3.6634   341
  3  1  1 16  1  0  0  2  1  1  5 3.6634   341
  4  1  1  5  1  0  0  1  1  1 16 3.6634   341
  4  1  1 16 -1  0 -1  1  1  1  5 3.6634   341
  1  1  1  5  1  0  1  4  2  1 16 3.6634   342
  1  1  1 16 -1  0  0  4  2  1  5 3.6634   342
  2  1  1  5 -1  0  0  3  2  1 16 3.6634   342
  3  1  1 16  1  0  0  2  2  1  5 3.6634   342
  4  1  1  5  1  0  0  1  2  1 16 3.6634   342
  4  1  1 16 -1  0 -1  1  2  1  5 3.6634   342
  1  2  1  5  1  0  1  4  1  1 16 3.6634   343
  1  2  1 16 -1  0  0  4  1  1  5 3.6634   343
  2  2  1  5 -1  0  0  3  1  1 16 3.6634   343
  3  2  1 16  1  0  0  2  1  1  5 3.6634   343
  4  2  1  5  1  0  0  1  1  1 16 3.6634   343
  4  2  1 16 -1  0 -1  1  1  1  5 3.6634   343
  1  2  1  5  1  0  1  4  2  1 16 3.6634   344
  1  2  1 16 -1  0  0  4  2  1  5 3.6634   344
  2  2  1  5 -1  0  0  3  2  1 16 3.6634   344
  3  2  1 16  1  0  0  2  2  1  5 3.6634   344
  4  2  1  5  1  0  0  1  2  1 16 3.6634   344
  2  1  1 16  1  0  1  3  2  1  5 3.6634   342
  3  2  1  5 -1  0 -1  2  1  1 16 3.6634   343
  2  2  1 16  1  0  1  3  2  1  5 3.6634   344
  3  2  1  5 -1  0 -1  2  2  1 16 3.6634   344
  4  2  1 16 -1  0 -1  1  2  1  5 3.6634   344
  2  1  1 16  1  0  1  3  1  1  5 3.6634   341
  3  1  1  5 -1  0 -1  2  1  1 16 3.6634   341
  3  1  1  5 -1  0 -1  2  2  1 16 3.6634   342
  2  2  1 16  1  0  1  3  1  1  5 3.6634   343
  2  1  1 16  1  0  0  2  1  1 21 3.6706   345
  2  1  1 21 -1  0  0  2  1  1 16 3.6706   345
  2  1  1 21 -1  0  0  2  2  1 16 3.6706   346
  2  2  1 16  1  0  0  2  1  1 21 3.6706   347
  1  1  1 16 -1  0  0  1  1  1 21 3.6706   345
  1  1  1 21  1  0  0  1  1  1 16 3.6706   345
  3  1  1 16  1  0  0  3  1  1 21 3.6706   345
  3  1  1 21 -1  0  0  3  1  1 16 3.6706   345
  1  1  1 21  1  0  0  1  2  1 16 3.6706   346
  4  1  1 21  1  0  0  4  2  1 16 3.6706   346
  1  2  1 16 -1  0  0  1  1  1 21 3.6706   347
  4  2  1 16 -1  0  0  4  1  1 21 3.6706   347
  3  1  1 21 -1  0  0  3  2  1 16 3.6706   346
  3  2  1 16  1  0  0  3  1  1 21 3.6706   347
  4  1  1 16 -1  0  0  4  1  1 21 3.6706   345
  4  1  1 21  1  0  0  4  1  1 16 3.6706   345
  2  1  1 14 -1  1  0  4  1  1  5 3.6734   345
  4  1  1  5  1 -1  0  2  1  1 14 3.6734   345
  2  1  1 14 -1  1  0  4  2  1  5 3.6734   346
  4  1  1  5  1 -1  0  2  2  1 14 3.6734   346
  2  2  1 14 -1  1  0  4  1  1  5 3.6734   347
  4  2  1  5  1 -1  0  2  1  1 14 3.6734   347
  2  2  1 14 -1  1  0  4  2  1  5 3.6734   348
  4  2  1  5  1 -1  0  2  2  1 14 3.6734   348
  1  1  1 14  1  0  1  3  2  1  5 3.6734   346
  3  2  1  5 -1  0 -1  1  1  1 14 3.6734   347
  1  2  1 14  1  0  1  3  2  1  5 3.6734   348
  2  2  1  5 -1  1  0  4  2  1 14 3.6734   348
  3  2  1  5 -1  0 -1  1  2  1 14 3.6734   348
  4  2  1 14  1 -1  0  2  2  1  5 3.6734   348
  1  1  1  5  1  0  1  3  2  1 14 3.6735   346
  3  1  1  5 -1  0 -1  1  2  1 14 3.6735   346
  4  1  1 14  1 -1  0  2  2  1  5 3.6735   346
  1  2  1 14  1  0  1  3  1  1  5 3.6735   347
  2  2  1  5 -1  1  0  4  1  1 14 3.6735   347
  3  2  1 14 -1  0 -1  1  1  1  5 3.6735   347
  1  2  1  5  1  0  1  3  2  1 14 3.6735   348
  3  2  1 14 -1  0 -1  1  2  1  5 3.6735   348
  1  1  1  5  1  0  1  3  1  1 14 3.6735   345
  1  1  1 14  1  0  1  3  1  1  5 3.6735   345
  2  1  1  5 -1  1  0  4  1  1 14 3.6735   345
  3  1  1  5 -1  0 -1  1  1  1 14 3.6735   345
  3  1  1 14 -1  0 -1  1  1  1  5 3.6735   345
  4  1  1 14  1 -1  0  2  1  1  5 3.6735   345
  2  1  1  5 -1  1  0  4  2  1 14 3.6735   346
  3  1  1 14 -1  0 -1  1  2  1  5 3.6735   346
  1  2  1  5  1  0  1  3  1  1 14 3.6735   347
  4  2  1 14  1 -1  0  2  1  1  5 3.6735   347
  2  2  1 21 -1  1  0  4  2  1  7 3.6790   352
  4  2  1  7  1 -1  0  2  2  1 21 3.6790   352
  1  1  1  7  1  0  1  3  2  1 21 3.6790   350
  4  1  1  7  1 -1  0  2  2  1 21 3.6790   350
  2  2  1 21 -1  1  0  4  1  1  7 3.6790   351
  3  2  1 21 -1  0 -1  1  1  1  7 3.6790   351
  1  2  1  7  1  0  1  3  2  1 21 3.6790   352
  2  2  1  7 -1  1  0  4  2  1 21 3.6790   352
  3  2  1 21 -1  0 -1  1  2  1  7 3.6790   352
  4  2  1 21  1 -1  0  2  2  1  7 3.6790   352
  2  1  1  7 -1  1  0  4  2  1 21 3.6790   350
  3  1  1  7 -1  0 -1  1  2  1 21 3.6790   350
  1  2  1 21  1  0  1  3  1  1  7 3.6790   351
  4  2  1 21  1 -1  0  2  1  1  7 3.6790   351
  1  2  1 21  1  0  1  3  2  1  7 3.6790   352
  3  2  1  7 -1  0 -1  1  2  1 21 3.6790   352
  1  1  1  8  1 -1  0  2  1  1 14 3.6815   349
  1  1  1 14  1  0  0  2  1  1  8 3.6815   349
  2  1  1  8 -1  0  0  1  1  1 14 3.6815   349
  2  1  1 14 -1  1  0  1  1  1  8 3.6815   349
  3  1  1  8 -1  1  0  4  1  1 14 3.6815   349
  4  1  1 14  1 -1  0  3  1  1  8 3.6815   349
  2  1  1  8 -1  0  0  1  2  1 14 3.6815   350
  2  1  1 14 -1  1  0  1  2  1  8 3.6815   350
  3  1  1  8 -1  1  0  4  2  1 14 3.6815   350
  4  1  1 14  1 -1  0  3  2  1  8 3.6815   350
  1  2  1  8  1 -1  0  2  1  1 14 3.6815   351
  1  2  1 14  1  0  0  2  1  1  8 3.6815   351
  3  2  1  8 -1  1  0  4  1  1 14 3.6815   351
  4  2  1 14  1 -1  0  3  1  1  8 3.6815   351
  3  1  1 14 -1  0  0  4  1  1  8 3.6815   349
  4  1  1  8  1  0  0  3  1  1 14 3.6815   349
  1  1  1  8  1 -1  0  2  2  1 14 3.6815   350
  1  1  1 14  1  0  0  2  2  1  8 3.6815   350
  3  1  1 14 -1  0  0  4  2  1  8 3.6815   350
  4  1  1  8  1  0  0  3  2  1 14 3.6815   350
  2  2  1  8 -1  0  0  1  1  1 14 3.6815   351
  2  2  1 14 -1  1  0  1  1  1  8 3.6815   351
  3  2  1 14 -1  0  0  4  1  1  8 3.6815   351
  4  2  1  8  1  0  0  3  1  1 14 3.6815   351
  1  2  1  8  1 -1  0  2  2  1 14 3.6815   352
  1  2  1 14  1  0  0  2  2  1  8 3.6815   352
  2  2  1  8 -1  0  0  1  2  1 14 3.6815   352
  2  2  1 14 -1  1  0  1  2  1  8 3.6815   352
  3  2  1  8 -1  1  0  4  2  1 14 3.6815   352
  4  2  1 14  1 -1  0  3  2  1  8 3.6815   352
  3  2  1 14 -1  0  0  4  2  1  8 3.6815   352
  4  2  1  8  1  0  0  3  2  1 14 3.6815   352
  2  1  1 15 -1  1  0  4  1  1  6 3.6845   353
  4  1  1  6  1 -1  0  2  1  1 15 3.6845   353
  2  1  1 15 -1  1  0  4  2  1  6 3.6845   354
  4  1  1  6  1 -1  0  2  2  1 15 3.6845   354
  4  1  1 15  1 -1  0  2  2  1  6 3.6845   354
  2  2  1  6 -1  1  0  4  1  1 15 3.6845   355
  2  2  1 15 -1  1  0  4  1  1  6 3.6845   355
  4  2  1  6  1 -1  0  2  1  1 15 3.6845   355
  2  2  1  6 -1  1  0  4  2  1 15 3.6845   356
  2  2  1 15 -1  1  0  4  2  1  6 3.6845   356
  4  2  1  6  1 -1  0  2  2  1 15 3.6845   356
  4  2  1 15  1 -1  0  2  2  1  6 3.6845   356
  1  1  1  6  1  0  1  3  1  1 15 3.6845   353
  1  1  1 15  1  0  1  3  1  1  6 3.6845   353
  2  1  1  6 -1  1  0  4  1  1 15 3.6845   353
  3  1  1  6 -1  0 -1  1  1  1 15 3.6845   353
  3  1  1 15 -1  0 -1  1  1  1  6 3.6845   353
  4  1  1 15  1 -1  0  2  1  1  6 3.6845   353
  1  1  1  6  1  0  1  3  2  1 15 3.6845   354
  1  1  1 15  1  0  1  3  2  1  6 3.6845   354
  2  1  1  6 -1  1  0  4  2  1 15 3.6845   354
  3  1  1  6 -1  0 -1  1  2  1 15 3.6845   354
  3  1  1 15 -1  0 -1  1  2  1  6 3.6845   354
  1  2  1  6  1  0  1  3  1  1 15 3.6845   355
  1  2  1 15  1  0  1  3  1  1  6 3.6845   355
  3  2  1  6 -1  0 -1  1  1  1 15 3.6845   355
  3  2  1 15 -1  0 -1  1  1  1  6 3.6845   355
  4  2  1 15  1 -1  0  2  1  1  6 3.6845   355
  1  2  1  6  1  0  1  3  2  1 15 3.6845   356
  1  2  1 15  1  0  1  3  2  1  6 3.6845   356
  3  2  1  6 -1  0 -1  1  2  1 15 3.6845   356
  3  2  1 15 -1  0 -1  1  2  1  6 3.6845   356
  2  1  1 22 -1  0  0  2  2  1 20 3.6847   354
  2  2  1 20  1  0  0  2  1  1 22 3.6847   355
  4  2  1 20 -1  0  0  4  2  1 22 3.6847   356
  4  2  1 22  1  0  0  4  2  1 20 3.6847   356
  1  1  1 22  1  0  0  1  2  1 20 3.6848   354
  4  1  1 22  1  0  0  4  2  1 20 3.6848   354
  4  2  1 20 -1  0  0  4  1  1 22 3.6848   355
  2  2  1 20  1  0  0  2  2  1 22 3.6848   356
  2  2  1 22 -1  0  0  2  2  1 20 3.6848   356
  3  1  1 22 -1  0  0  3  2  1 20 3.6848   354
  1  2  1 20 -1  0  0  1  1  1 22 3.6848   355
  3  2  1 20  1  0  0  3  1  1 22 3.6848   355
  1  2  1 20 -1  0  0  1  2  1 22 3.6848   356
  1  2  1 22  1  0  0  1  2  1 20 3.6848   356
  3  2  1 20  1  0  0  3  2  1 22 3.6848   356
  3  2  1 22 -1  0  0  3  2  1 20 3.6848   356
  1  1  1 11  1 -1  0  2  2  1 26 3.6918   358
  4  1  1 11  1  0  0  3  2  1 26 3.6918   358
  2  2  1 26 -1  1  0  1  1  1 11 3.6918   359
  3  2  1 26 -1  0  0  4  1  1 11 3.6918   359
  1  2  1 11  1 -1  0  2  2  1 26 3.6918   360
  2  2  1 26 -1  1  0  1  2  1 11 3.6918   360
  2  1  1 11 -1  0  0  1  2  1 26 3.6918   358
  3  1  1 11 -1  1  0  4  2  1 26 3.6918   358
  1  2  1 26  1  0  0  2  1  1 11 3.6918   359
  4  2  1 26  1 -1  0  3  1  1 11 3.6918   359
  1  2  1 26  1  0  0  2  2  1 11 3.6918   360
  2  2  1 11 -1  0  0  1  2  1 26 3.6918   360
  3  2  1 11 -1  1  0  4  2  1 26 3.6918   360
  3  2  1 26 -1  0  0  4  2  1 11 3.6918   360
  4  2  1 11  1  0  0  3  2  1 26 3.6918   360
  4  2  1 26  1 -1  0  3  2  1 11 3.6918   360
  4  1  1  4  1 -1  0  2  2  1 15 3.6946   358
  2  2  1 15 -1  1  0  4  1  1  4 3.6946   359
  2  2  1 15 -1  1  0  4  2  1  4 3.6946   360
  4  2  1  4  1 -1  0  2  2  1 15 3.6946   360
  2  1  1 15 -1  1  0  4  1  1  4 3.6946   357
  4  1  1  4  1 -1  0  2  1  1 15 3.6946   357
  1  1  1 15  1  0  1  3  2  1  4 3.6946   358
  2  1  1 15 -1  1  0  4  2  1  4 3.6946   358
  3  2  1  4 -1  0 -1  1  1  1 15 3.6946   359
  4  2  1  4  1 -1  0  2  1  1 15 3.6946   359
  1  2  1 15  1  0  1  3  2  1  4 3.6946   360
  2  2  1  4 -1  1  0  4  2  1 15 3.6946   360
  3  2  1  4 -1  0 -1  1  2  1 15 3.6946   360
  4  2  1 15  1 -1  0  2  2  1  4 3.6946   360
  1  1  1  4  1  0  1  3  2  1 15 3.6946   358
  4  1  1 15  1 -1  0  2  2  1  4 3.6946   358
  2  2  1  4 -1  1  0  4  1  1 15 3.6946   359
  3  2  1 15 -1  0 -1  1  1  1  4 3.6946   359
  1  2  1  4  1  0  1  3  2  1 15 3.6946   360
  3  2  1 15 -1  0 -1  1  2  1  4 3.6946   360
  1  1  1  4  1  0  1  3  1  1 15 3.6947   357
  1  1  1 15  1  0  1  3  1  1  4 3.6947   357
  2  1  1  4 -1  1  0  4  1  1 15 3.6947   357
  3  1  1  4 -1  0 -1  1  1  1 15 3.6947   357
  3  1  1 15 -1  0 -1  1  1  1  4 3.6947   357
  4  1  1 15  1 -1  0  2  1  1  4 3.6947   357
  2  1  1  4 -1  1  0  4  2  1 15 3.6947   358
  3  1  1  4 -1  0 -1  1  2  1 15 3.6947   358
  3  1  1 15 -1  0 -1  1  2  1  4 3.6947   358
  1  2  1  4  1  0  1  3  1  1 15 3.6947   359
  1  2  1 15  1  0  1  3  1  1  4 3.6947   359
  4  2  1 15  1 -1  0  2  1  1  4 3.6947   359
  4  2  1 16 -1  0  0  4  2  1 21 3.6950   360
  4  2  1 21  1  0  0  4  2  1 16 3.6950   360
  1  1  1 16 -1  0  0  1  2  1 21 3.6950   358
  2  1  1 16  1  0  0  2  2  1 21 3.6950   358
  1  2  1 21  1  0  0  1  1  1 16 3.6950   359
  2  2  1 21 -1  0  0  2  1  1 16 3.6950   359
  1  2  1 16 -1  0  0  1  2  1 21 3.6950   360
  1  2  1 21  1  0  0  1  2  1 16 3.6950   360
  2  2  1 16  1  0  0  2  2  1 21 3.6950   360
  2  2  1 21 -1  0  0  2  2  1 16 3.6950   360
  3  1  1 16  1  0  0  3  2  1 21 3.6950   358
  4  1  1 16 -1  0  0  4  2  1 21 3.6950   358
  3  2  1 21 -1  0  0  3  1  1 16 3.6950   359
  4  2  1 21  1  0  0  4  1  1 16 3.6950   359
  3  2  1 16  1  0  0  3  2  1 21 3.6950   360
  3  2  1 21 -1  0  0  3  2  1 16 3.6950   360
  2  1  1 10 -1  1  0  4  1  1  5 3.6959   357
  4  1  1  5  1 -1  0  2  1  1 10 3.6959   357
  4  1  1  5  1 -1  0  2  2  1 10 3.6959   358
  2  2  1 10 -1  1  0  4  1  1  5 3.6959   359
  1  1  1 10  1  0  1  3  2  1  5 3.6959   358
  2  1  1 10 -1  1  0  4  2  1  5 3.6959   358
  3  2  1  5 -1  0 -1  1  1  1 10 3.6959   359
  4  2  1  5  1 -1  0  2  1  1 10 3.6959   359
  1  2  1 10  1  0  1  3  2  1  5 3.6959   360
  2  2  1  5 -1  1  0  4  2  1 10 3.6959   360
  2  2  1 10 -1  1  0  4  2  1  5 3.6959   360
  3  2  1  5 -1  0 -1  1  2  1 10 3.6959   360
  4  2  1  5  1 -1  0  2  2  1 10 3.6959   360
  4  2  1 10  1 -1  0  2  2  1  5 3.6959   360
  1  1  1  5  1  0  1  3  1  1 10 3.6959   357
  1  1  1 10  1  0  1  3  1  1  5 3.6959   357
  3  1  1  5 -1  0 -1  1  1  1 10 3.6959   357
  3  1  1 10 -1  0 -1  1  1  1  5 3.6959   357
  1  1  1  5  1  0  1  3  2  1 10 3.6959   358
  2  1  1  5 -1  1  0  4  2  1 10 3.6959   358
  3  1  1  5 -1  0 -1  1  2  1 10 3.6959   358
  3  1  1 10 -1  0 -1  1  2  1  5 3.6959   358
  4  1  1 10  1 -1  0  2  2  1  5 3.6959   358
  1  2  1  5  1  0  1  3  1  1 10 3.6959   359
  1  2  1 10  1  0  1  3  1  1  5 3.6959   359
  2  2  1  5 -1  1  0  4  1  1 10 3.6959   359
  3  2  1 10 -1  0 -1  1  1  1  5 3.6959   359
  4  2  1 10  1 -1  0  2  1  1  5 3.6959   359
  1  2  1  5  1  0  1  3  2  1 10 3.6959   360
  3  2  1 10 -1  0 -1  1  2  1  5 3.6959   360
  2  1  1  5 -1  1  0  4  1  1 10 3.6959   357
  4  1  1 10  1 -1  0  2  1  1  5 3.6959   357
  1  1  1 27  1 -1  0  2  1  1 21 3.7021   361
  2  1  1 21 -1  1  0  1  1  1 27 3.7021   361
  3  1  1 21 -1  0  0  4  1  1 27 3.7021   361
  4  1  1 27  1  0  0  3  1  1 21 3.7021   361
  1  1  1 21  1  0  0  2  1  1 27 3.7021   361
  2  1  1 27 -1  0  0  1  1  1 21 3.7021   361
  3  1  1 27 -1  1  0  4  1  1 21 3.7021   361
  4  1  1 21  1 -1  0  3  1  1 27 3.7021   361
  4  1  1  3  1 -1  0  2  2  1  2 3.7022   362
  2  2  1  2 -1  1  0  4  1  1  3 3.7022   363
  2  2  1  2 -1  1  0  4  2  1  3 3.7022   364
  2  2  1  3 -1  1  0  4  2  1  2 3.7022   364
  4  2  1  2  1 -1  0  2  2  1  3 3.7022   364
  4  2  1  3  1 -1  0  2  2  1  2 3.7022   364
  2  1  1  2 -1  1  0  4  1  1  3 3.7022   361
  4  1  1  3  1 -1  0  2  1  1  2 3.7022   361
  1  1  1  2  1  0  1  3  2  1  3 3.7022   362
  1  1  1  3  1  0  1  3  2  1  2 3.7022   362
  2  1  1  2 -1  1  0  4  2  1  3 3.7022   362
  2  1  1  3 -1  1  0  4  2  1  2 3.7022   362
  4  1  1  2  1 -1  0  2  2  1  3 3.7022   362
  2  2  1  3 -1  1  0  4  1  1  2 3.7022   363
  3  2  1  2 -1  0 -1  1  1  1  3 3.7022   363
  3  2  1  3 -1  0 -1  1  1  1  2 3.7022   363
  4  2  1  2  1 -1  0  2  1  1  3 3.7022   363
  4  2  1  3  1 -1  0  2  1  1  2 3.7022   363
  1  2  1  2  1  0  1  3  2  1  3 3.7022   364
  1  2  1  3  1  0  1  3  2  1  2 3.7022   364
  3  2  1  2 -1  0 -1  1  2  1  3 3.7022   364
  3  2  1  3 -1  0 -1  1  2  1  2 3.7022   364
  1  1  1  2  1  0  1  3  1  1  3 3.7022   361
  2  1  1  3 -1  1  0  4  1  1  2 3.7022   361
  3  1  1  3 -1  0 -1  1  1  1  2 3.7022   361
  4  1  1  2  1 -1  0  2  1  1  3 3.7022   361
  3  1  1  3 -1  0 -1  1  2  1  2 3.7022   362
  1  2  1  2  1  0  1  3  1  1  3 3.7022   363
  1  1  1  3  1  0  1  3  1  1  2 3.7022   361
  3  1  1  2 -1  0 -1  1  1  1  3 3.7022   361
  3  1  1  2 -1  0 -1  1  2  1  3 3.7022   362
  1  2  1  3  1  0  1  3  1  1  2 3.7022   363
  4  1  1  3  1 -1  0  2  2  1  8 3.7160   374
  2  2  1  8 -1  1  0  4  1  1  3 3.7160   375
  2  1  1  8 -1  1  0  4  1  1  3 3.7160   373
  4  1  1  3  1 -1  0  2  1  1  8 3.7160   373
  1  1  1  8  1  0  1  3  2  1  3 3.7160   374
  2  1  1  3 -1  1  0  4  2  1  8 3.7160   374
  2  1  1  8 -1  1  0  4  2  1  3 3.7160   374
  4  1  1  8  1 -1  0  2  2  1  3 3.7160   374
  2  2  1  3 -1  1  0  4  1  1  8 3.7160   375
  3  2  1  3 -1  0 -1  1  1  1  8 3.7160   375
  4  2  1  3  1 -1  0  2  1  1  8 3.7160   375
  4  2  1  8  1 -1  0  2  1  1  3 3.7160   375
  1  2  1  8  1  0  1  3  2  1  3 3.7160   376
  2  2  1  3 -1  1  0  4  2  1  8 3.7160   376
  2  2  1  8 -1  1  0  4  2  1  3 3.7160   376
  3  2  1  3 -1  0 -1  1  2  1  8 3.7160   376
  4  2  1  3  1 -1  0  2  2  1  8 3.7160   376
  4  2  1  8  1 -1  0  2  2  1  3 3.7160   376
  1  1  1  3  1  0  1  3  1  1  8 3.7160   373
  1  1  1  8  1  0  1  3  1  1  3 3.7160   373
  2  1  1  3 -1  1  0  4  1  1  8 3.7160   373
  3  1  1  3 -1  0 -1  1  1  1  8 3.7160   373
  3  1  1  8 -1  0 -1  1  1  1  3 3.7160   373
  4  1  1  8  1 -1  0  2  1  1  3 3.7160   373
  1  1  1  3  1  0  1  3  2  1  8 3.7160   374
  3  1  1  3 -1  0 -1  1  2  1  8 3.7160   374
  3  1  1  8 -1  0 -1  1  2  1  3 3.7160   374
  1  2  1  3  1  0  1  3  1  1  8 3.7160   375
  1  2  1  8  1  0  1  3  1  1  3 3.7160   375
  3  2  1  8 -1  0 -1  1  1  1  3 3.7160   375
  1  2  1  3  1  0  1  3  2  1  8 3.7160   376
  3  2  1  8 -1  0 -1  1  2  1  3 3.7160   376
  4  1  1  2  1 -1  0  2  2  1  7 3.7179   374
  4  1  1  7  1 -1  0  2  2  1  2 3.7179   374
  2  2  1  2 -1  1  0  4  1  1  7 3.7179   375
  2  2  1  7 -1  1  0  4  1  1  2 3.7179   375
  2  2  1  2 -1  1  0  4  2  1  7 3.7179   376
  2  2  1  7 -1  1  0  4  2  1  2 3.7179   376
  4  2  1  2  1 -1  0  2  2  1  7 3.7179   376
  4  2  1  7  1 -1  0  2  2  1  2 3.7179   376
  1  1  1  2  1  0  1  3  1  1  7 3.7179   373
  2  1  1  2 -1  1  0  4  1  1  7 3.7179   373
  2  1  1  7 -1  1  0  4  1  1  2 3.7179   373
  3  1  1  7 -1  0 -1  1  1  1  2 3.7179   373
  4  1  1  2  1 -1  0  2  1  1  7 3.7179   373
  4  1  1  7  1 -1  0  2  1  1  2 3.7179   373
  1  1  1  2  1  0  1  3  2  1  7 3.7179   374
  1  1  1  7  1  0  1  3  2  1  2 3.7179   374
  2  1  1  2 -1  1  0  4  2  1  7 3.7179   374
  2  1  1  7 -1  1  0  4  2  1  2 3.7179   374
  3  1  1  7 -1  0 -1  1  2  1  2 3.7179   374
  1  2  1  2  1  0  1  3  1  1  7 3.7179   375
  3  2  1  2 -1  0 -1  1  1  1  7 3.7179   375
  3  2  1  7 -1  0 -1  1  1  1  2 3.7179   375
  4  2  1  2  1 -1  0  2  1  1  7 3.7179   375
  4  2  1  7  1 -1  0  2  1  1  2 3.7179   375
  1  2  1  2  1  0  1  3  2  1  7 3.7179   376
  1  2  1  7  1  0  1  3  2  1  2 3.7179   376
  3  2  1  2 -1  0 -1  1  2  1  7 3.7179   376
  3  2  1  7 -1  0 -1  1  2  1  2 3.7179   376
  1  1  1  7  1  0  1  3  1  1  2 3.7180   373
  3  1  1  2 -1  0 -1  1  1  1  7 3.7180   373
  3  1  1  2 -1  0 -1  1  2  1  7 3.7180   374
  1  2  1  7  1  0  1  3  1  1  2 3.7180   375
  4  1  1 17  0  0 -1  1  2  1 20 3.7180   374
  1  2  1 20  0  0  1  4  1  1 17 3.7180   375
  3  1  1 17  0  0  0  2  2  1 20 3.7181   374
  2  2  1 20  0  0  0  3  1  1 17 3.7181   375
  2  2  1 20  0  0  0  3  2  1 17 3.7181   376
  3  2  1 17  0  0  0  2  2  1 20 3.7181   376
  1  1  1 17  0  0  0  4  2  1 20 3.7181   374
  4  2  1 20  0  0  0  1  1  1 17 3.7181   375
  1  2  1 17  0  0  0  4  2  1 20 3.7181   376
  1  2  1 20  0  0  1  4  2  1 17 3.7181   376
  4  2  1 17  0  0 -1  1  2  1 20 3.7181   376
  4  2  1 20  0  0  0  1  2  1 17 3.7181   376
  3  2  1 20  0  0 -1  2  1  1 17 3.7181   375
  2  1  1 17  0  0  1  3  2  1 20 3.7181   374
  2  2  1 17  0  0  1  3  2  1 20 3.7181   376
  3  2  1 20  0  0 -1  2  2  1 17 3.7181   376
  4  1  1 21  1 -1  0  2  2  1  7 3.7184   374
  2  2  1  7 -1  1  0  4  1  1 21 3.7184   375
  2  1  1  7 -1  1  0  4  1  1 21 3.7184   373
  4  1  1 21  1 -1  0  2  1  1  7 3.7184   373
  2  1  1 21 -1  1  0  4  2  1  7 3.7184   374
  4  2  1  7  1 -1  0  2  1  1 21 3.7184   375
  1  1  1 21  1  0  1  3  1  1  7 3.7184   373
  2  1  1 21 -1  1  0  4  1  1  7 3.7184   373
  3  1  1  7 -1  0 -1  1  1  1 21 3.7184   373
  4  1  1  7  1 -1  0  2  1  1 21 3.7184   373
  1  1  1 21  1  0  1  3  2  1  7 3.7184   374
  1  2  1  7  1  0  1  3  1  1 21 3.7184   375
  3  2  1  7 -1  0 -1  1  1  1 21 3.7184   375
  1  1  1  7  1  0  1  3  1  1 21 3.7184   373
  3  1  1 21 -1  0 -1  1  1  1  7 3.7184   373
  3  1  1 21 -1  0 -1  1  2  1  7 3.7184   374
  4  1  1  4  1 -1  0  2  2  1  9 3.7270   378
  2  2  1  9 -1  1  0  4  1  1  4 3.7270   379
  2  1  1  9 -1  1  0  4  1  1  4 3.7270   377
  4  1  1  4  1 -1  0  2  1  1  9 3.7270   377
  1  1  1  9  1  0  1  3  2  1  4 3.7270   378
  2  1  1  9 -1  1  0  4  2  1  4 3.7270   378
  3  2  1  4 -1  0 -1  1  1  1  9 3.7270   379
  4  2  1  4  1 -1  0  2  1  1  9 3.7270   379
  1  2  1  9  1  0  1  3  2  1  4 3.7270   380
  2  2  1  4 -1  1  0  4  2  1  9 3.7270   380
  2  2  1  9 -1  1  0  4  2  1  4 3.7270   380
  3  2  1  4 -1  0 -1  1  2  1  9 3.7270   380
  4  2  1  4  1 -1  0  2  2  1  9 3.7270   380
  4  2  1  9  1 -1  0  2  2  1  4 3.7270   380
  1  1  1  4  1  0  1  3  1  1  9 3.7270   377
  1  1  1  9  1  0  1  3  1  1  4 3.7270   377
  3  1  1  4 -1  0 -1  1  1  1  9 3.7270   377
  3  1  1  9 -1  0 -1  1  1  1  4 3.7270   377
  1  1  1  4  1  0  1  3  2  1  9 3.7270   378
  2  1  1  4 -1  1  0  4  2  1  9 3.7270   378
  3  1  1  4 -1  0 -1  1  2  1  9 3.7270   378
  3  1  1  9 -1  0 -1  1  2  1  4 3.7270   378
  4  1  1  9  1 -1  0  2  2  1  4 3.7270   378
  1  2  1  4  1  0  1  3  1  1  9 3.7270   379
  1  2  1  9  1  0  1  3  1  1  4 3.7270   379
  2  2  1  4 -1  1  0  4  1  1  9 3.7270   379
  3  2  1  9 -1  0 -1  1  1  1  4 3.7270   379
  4  2  1  9  1 -1  0  2  1  1  4 3.7270   379
  1  2  1  4  1  0  1  3  2  1  9 3.7270   380
  3  2  1  9 -1  0 -1  1  2  1  4 3.7270   380
  2  1  1  4 -1  1  0  4  1  1  9 3.7270   377
  4  1  1  9  1 -1  0  2  1  1  4 3.7270   377
  3  1  1 18  0  0  0  2  2  1 20 3.7300   382
  2  2  1 20  0  0  0  3  1  1 18 3.7300   383
  4  1  1 18  0  0 -1  1  2  1 20 3.7300   382
  1  2  1 20  0  0  1  4  1  1 18 3.7300   383
  1  2  1 20  0  0  1  4  2  1 18 3.7300   384
  2  2  1 18  0  0  1  3  2  1 20 3.7300   384
  2  2  1 20  0  0  0  3  2  1 18 3.7300   384
  3  2  1 18  0  0  0  2  2  1 20 3.7300   384
  3  2  1 20  0  0 -1  2  2  1 18 3.7300   384
  4  2  1 18  0  0 -1  1  2  1 20 3.7300   384
  1  1  1 18  0  0  0  4  2  1 20 3.7300   382
  2  1  1 18  0  0  1  3  2  1 20 3.7300   382
  3  2  1 20  0  0 -1  2  1  1 18 3.7300   383
  4  2  1 20  0  0  0  1  1  1 18 3.7300   383
  1  2  1 18  0  0  0  4  2  1 20 3.7300   384
  4  2  1 20  0  0  0  1  2  1 18 3.7300   384
  3  1  1 21 -1  0  0  4  1  1 10 3.7396   385
  4  1  1 10  1  0  0  3  1  1 21 3.7396   385
  1  1  1 10  1 -1  0  2  1  1 21 3.7396   385
  1  1  1 21  1  0  0  2  1  1 10 3.7396   385
  2  1  1 10 -1  0  0  1  1  1 21 3.7396   385
  2  1  1 21 -1  1  0  1  1  1 10 3.7396   385
  3  1  1 10 -1  1  0  4  1  1 21 3.7396   385
  4  1  1 21  1 -1  0  3  1  1 10 3.7396   385
  2  1  1 21 -1  1  0  1  2  1 10 3.7396   386
  3  1  1 21 -1  0  0  4  2  1 10 3.7396   386
  1  2  1 10  1 -1  0  2  1  1 21 3.7396   387
  4  2  1 10  1  0  0  3  1  1 21 3.7396   387
  1  1  1 21  1  0  0  2  2  1 10 3.7397   386
  4  1  1 21  1 -1  0  3  2  1 10 3.7397   386
  2  2  1 10 -1  0  0  1  1  1 21 3.7397   387
  3  2  1 10 -1  1  0  4  1  1 21 3.7397   387
  1  1  1  7  0  0  1  4  1  1 14 3.7415   385
  1  1  1 14  0  0  0  4  1  1  7 3.7415   385
  2  1  1  7  0  0  0  3  1  1 14 3.7415   385
  3  1  1 14  0  0  0  2  1  1  7 3.7415   385
  4  1  1  7  0  0  0  1  1  1 14 3.7415   385
  4  1  1 14  0  0 -1  1  1  1  7 3.7415   385
  1  1  1 14  0  0  0  4  2  1  7 3.7415   386
  2  1  1 14  0  0  1  3  2  1  7 3.7415   386
  3  1  1 14  0  0  0  2  2  1  7 3.7415   386
  4  1  1  7  0  0  0  1  2  1 14 3.7415   386
  4  1  1 14  0  0 -1  1  2  1  7 3.7415   386
  1  2  1  7  0  0  1  4  1  1 14 3.7415   387
  1  2  1 14  0  0  0  4  1  1  7 3.7415   387
  2  2  1  7  0  0  0  3  1  1 14 3.7415   387
  3  2  1  7  0  0 -1  2  1  1 14 3.7415   387
  4  2  1  7  0  0  0  1  1  1 14 3.7415   387
  1  2  1 14  0  0  0  4  2  1  7 3.7415   388
  2  2  1 14  0  0  1  3  2  1  7 3.7415   388
  3  2  1  7  0  0 -1  2  2  1 14 3.7415   388
  4  2  1  7  0  0  0  1  2  1 14 3.7415   388
  2  1  1 14  0  0  1  3  1  1  7 3.7415   385
  3  1  1  7  0  0 -1  2  1  1 14 3.7415   385
  1  1  1  7  0  0  1  4  2  1 14 3.7415   386
  2  1  1  7  0  0  0  3  2  1 14 3.7415   386
  3  1  1  7  0  0 -1  2  2  1 14 3.7415   386
  2  2  1 14  0  0  1  3  1  1  7 3.7415   387
  3  2  1 14  0  0  0  2  1  1  7 3.7415   387
  4  2  1 14  0  0 -1  1  1  1  7 3.7415   387
  1  2  1  7  0  0  1  4  2  1 14 3.7415   388
  2  2  1  7  0  0  0  3  2  1 14 3.7415   388
  3  2  1 14  0  0  0  2  2  1  7 3.7415   388
  4  2  1 14  0  0 -1  1  2  1  7 3.7415   388
  2  2  1  8 -1  1  0  4  2  1 21 3.7541   396
  2  2  1 21 -1  1  0  4  2  1  8 3.7541   396
  4  2  1  8  1 -1  0  2  2  1 21 3.7541   396
  4  2  1 21  1 -1  0  2  2  1  8 3.7541   396
  1  1  1  8  1  0  1  3  2  1 21 3.7542   394
  2  1  1  8 -1  1  0  4  2  1 21 3.7542   394
  4  1  1  8  1 -1  0  2  2  1 21 3.7542   394
  2  2  1 21 -1  1  0  4  1  1  8 3.7542   395
  3  2  1 21 -1  0 -1  1  1  1  8 3.7542   395
  4  2  1 21  1 -1  0  2  1  1  8 3.7542   395
  1  2  1  8  1  0  1  3  2  1 21 3.7542   396
  3  2  1 21 -1  0 -1  1  2  1  8 3.7542   396
  3  1  1  8 -1  0 -1  1  2  1 21 3.7542   394
  1  2  1 21  1  0  1  3  1  1  8 3.7542   395
  1  2  1 21  1  0  1  3  2  1  8 3.7542   396
  3  2  1  8 -1  0 -1  1  2  1 21 3.7542   396
  1  1  1  3  1 -1  0  2  1  1 13 3.7663   401
  1  1  1 13  1  0  0  2  1  1  3 3.7663   401
  2  1  1  3 -1  0  0  1  1  1 13 3.7663   401
  2  1  1 13 -1  1  0  1  1  1  3 3.7663   401
  3  1  1  3 -1  1  0  4  1  1 13 3.7663   401
  4  1  1 13  1 -1  0  3  1  1  3 3.7663   401
  2  1  1  3 -1  0  0  1  2  1 13 3.7663   402
  3  1  1  3 -1  1  0  4  2  1 13 3.7663   402
  1  2  1  3  1 -1  0  2  1  1 13 3.7663   403
  1  2  1 13  1  0  0  2  1  1  3 3.7663   403
  4  2  1 13  1 -1  0  3  1  1  3 3.7663   403
  3  1  1 13 -1  0  0  4  1  1  3 3.7663   401
  4  1  1  3  1  0  0  3  1  1 13 3.7663   401
  1  1  1  3  1 -1  0  2  2  1 13 3.7663   402
  1  1  1 13  1  0  0  2  2  1  3 3.7663   402
  2  1  1 13 -1  1  0  1  2  1  3 3.7663   402
  3  1  1 13 -1  0  0  4  2  1  3 3.7663   402
  4  1  1  3  1  0  0  3  2  1 13 3.7663   402
  4  1  1 13  1 -1  0  3  2  1  3 3.7663   402
  2  2  1  3 -1  0  0  1  1  1 13 3.7663   403
  2  2  1 13 -1  1  0  1  1  1  3 3.7663   403
  3  2  1  3 -1  1  0  4  1  1 13 3.7663   403
  3  2  1 13 -1  0  0  4  1  1  3 3.7663   403
  4  2  1  3  1  0  0  3  1  1 13 3.7663   403
  1  2  1  3  1 -1  0  2  2  1 13 3.7663   404
  1  2  1 13  1  0  0  2  2  1  3 3.7663   404
  2  2  1  3 -1  0  0  1  2  1 13 3.7663   404
  2  2  1 13 -1  1  0  1  2  1  3 3.7663   404
  3  2  1  3 -1  1  0  4  2  1 13 3.7663   404
  3  2  1 13 -1  0  0  4  2  1  3 3.7663   404
  4  2  1  3  1  0  0  3  2  1 13 3.7663   404
  4  2  1 13  1 -1  0  3  2  1  3 3.7663   404
  2  1  1 13 -1  1  0  4  1  1  5 3.7833   409
  4  1  1  5  1 -1  0  2  1  1 13 3.7833   409
  4  1  1  5  1 -1  0  2  2  1 13 3.7833   410
  2  2  1 13 -1  1  0  4  1  1  5 3.7833   411
  2  1  1 13 -1  1  0  4  2  1  5 3.7833   410
  3  2  1  5 -1  0 -1  1  1  1 13 3.7833   411
  4  2  1  5  1 -1  0  2  1  1 13 3.7833   411
  1  2  1 13  1  0  1  3  2  1  5 3.7833   412
  2  2  1 13 -1  1  0  4  2  1  5 3.7833   412
  3  2  1  5 -1  0 -1  1  2  1 13 3.7833   412
  4  2  1  5  1 -1  0  2  2  1 13 3.7833   412
  1  1  1 13  1  0  1  3  2  1  5 3.7833   410
  2  2  1  5 -1  1  0  4  2  1 13 3.7833   412
  4  2  1 13  1 -1  0  2  2  1  5 3.7833   412
  1  1  1 13  1  0  1  3  1  1  5 3.7833   409
  3  1  1  5 -1  0 -1  1  1  1 13 3.7833   409
  1  1  1  5  1  0  1  3  2  1 13 3.7833   410
  2  1  1  5 -1  1  0  4  2  1 13 3.7833   410
  3  1  1  5 -1  0 -1  1  2  1 13 3.7833   410
  4  1  1 13  1 -1  0  2  2  1  5 3.7833   410
  1  2  1 13  1  0  1  3  1  1  5 3.7833   411
  2  2  1  5 -1  1  0  4  1  1 13 3.7833   411
  3  2  1 13 -1  0 -1  1  1  1  5 3.7833   411
  4  2  1 13  1 -1  0  2  1  1  5 3.7833   411
  1  2  1  5  1  0  1  3  2  1 13 3.7833   412
  3  2  1 13 -1  0 -1  1  2  1  5 3.7833   412
  1  1  1  5  1  0  1  3  1  1 13 3.7834   409
  2  1  1  5 -1  1  0  4  1  1 13 3.7834   409
  3  1  1 13 -1  0 -1  1  1  1  5 3.7834   409
  4  1  1 13  1 -1  0  2  1  1  5 3.7834   409
  3  1  1 13 -1  0 -1  1  2  1  5 3.7834   410
  1  2  1  5  1  0  1  3  1  1 13 3.7834   411
  1  1  1 10  1 -1  0  2  2  1 21 3.7933   418
  2  1  1 10 -1  0  0  1  2  1 21 3.7933   418
  4  1  1 10  1  0  0  3  2  1 21 3.7933   418
  1  2  1 21  1  0  0  2  1  1 10 3.7933   419
  2  2  1 21 -1  1  0  1  1  1 10 3.7933   419
  3  2  1 21 -1  0  0  4  1  1 10 3.7933   419
  1  2  1 10  1 -1  0  2  2  1 21 3.7933   420
  2  2  1 21 -1  1  0  1  2  1 10 3.7933   420
  3  1  1 10 -1  1  0  4  2  1 21 3.7933   418
  4  2  1 21  1 -1  0  3  1  1 10 3.7933   419
  1  2  1 21  1  0  0  2  2  1 10 3.7933   420
  2  2  1 10 -1  0  0  1  2  1 21 3.7933   420
  3  2  1 10 -1  1  0  4  2  1 21 3.7933   420
  3  2  1 21 -1  0  0  4  2  1 10 3.7933   420
  4  2  1 10  1  0  0  3  2  1 21 3.7933   420
  4  2  1 21  1 -1  0  3  2  1 10 3.7933   420
  2  1  1 11 -1  1  0  4  1  1  5 3.8042   425
  4  1  1  5  1 -1  0  2  1  1 11 3.8042   425
  4  1  1  5  1 -1  0  2  2  1 11 3.8042   426
  2  2  1 11 -1  1  0  4  1  1  5 3.8042   427
  1  1  1 11  1  0  1  3  2  1  5 3.8042   426
  2  1  1 11 -1  1  0  4  2  1  5 3.8042   426
  3  2  1  5 -1  0 -1  1  1  1 11 3.8042   427
  4  2  1  5  1 -1  0  2  1  1 11 3.8042   427
  1  2  1 11  1  0  1  3  2  1  5 3.8042   428
  2  2  1  5 -1  1  0  4  2  1 11 3.8042   428
  2  2  1 11 -1  1  0  4  2  1  5 3.8042   428
  3  2  1  5 -1  0 -1  1  2  1 11 3.8042   428
  4  2  1  5  1 -1  0  2  2  1 11 3.8042   428
  4  2  1 11  1 -1  0  2  2  1  5 3.8042   428
  1  1  1  5  1  0  1  3  1  1 11 3.8042   425
  1  1  1 11  1  0  1  3  1  1  5 3.8042   425
  3  1  1  5 -1  0 -1  1  1  1 11 3.8042   425
  3  1  1 11 -1  0 -1  1  1  1  5 3.8042   425
  1  1  1  5  1  0  1  3  2  1 11 3.8042   426
  2  1  1  5 -1  1  0  4  2  1 11 3.8042   426
  3  1  1  5 -1  0 -1  1  2  1 11 3.8042   426
  3  1  1 11 -1  0 -1  1  2  1  5 3.8042   426
  4  1  1 11  1 -1  0  2  2  1  5 3.8042   426
  1  2  1  5  1  0  1  3  1  1 11 3.8042   427
  1  2  1 11  1  0  1  3  1  1  5 3.8042   427
  2  2  1  5 -1  1  0  4  1  1 11 3.8042   427
  3  2  1 11 -1  0 -1  1  1  1  5 3.8042   427
  4  2  1 11  1 -1  0  2  1  1  5 3.8042   427
  1  2  1  5  1  0  1  3  2  1 11 3.8042   428
  3  2  1 11 -1  0 -1  1  2  1  5 3.8042   428
  2  1  1  5 -1  1  0  4  1  1 11 3.8043   425
  4  1  1 11  1 -1  0  2  1  1  5 3.8043   425
  4  1  1 15  1 -1  0  2  2  1  7 3.8064   426
  2  2  1  7 -1  1  0  4  1  1 15 3.8064   427
  2  2  1  7 -1  1  0  4  2  1 15 3.8064   428
  4  2  1 15  1 -1  0  2  2  1  7 3.8064   428
  1  1  1 15  1  0  1  3  1  1  7 3.8064   425
  2  1  1  7 -1  1  0  4  1  1 15 3.8064   425
  2  1  1 15 -1  1  0  4  1  1  7 3.8064   425
  3  1  1  7 -1  0 -1  1  1  1 15 3.8064   425
  4  1  1  7  1 -1  0  2  1  1 15 3.8064   425
  4  1  1 15  1 -1  0  2  1  1  7 3.8064   425
  1  1  1  7  1  0  1  3  2  1 15 3.8064   426
  1  1  1 15  1  0  1  3  2  1  7 3.8064   426
  2  1  1  7 -1  1  0  4  2  1 15 3.8064   426
  2  1  1 15 -1  1  0  4  2  1  7 3.8064   426
  3  1  1  7 -1  0 -1  1  2  1 15 3.8064   426
  4  1  1  7  1 -1  0  2  2  1 15 3.8064   426
  1  2  1 15  1  0  1  3  1  1  7 3.8064   427
  2  2  1 15 -1  1  0  4  1  1  7 3.8064   427
  3  2  1 15 -1  0 -1  1  1  1  7 3.8064   427
  4  2  1  7  1 -1  0  2  1  1 15 3.8064   427
  4  2  1 15  1 -1  0  2  1  1  7 3.8064   427
  1  2  1  7  1  0  1  3  2  1 15 3.8064   428
  1  2  1 15  1  0  1  3  2  1  7 3.8064   428
  2  2  1 15 -1  1  0  4  2  1  7 3.8064   428
  3  2  1 15 -1  0 -1  1  2  1  7 3.8064   428
  4  2  1  7  1 -1  0  2  2  1 15 3.8064   428
  1  1  1  7  1  0  1  3  1  1 15 3.8064   425
  3  1  1 15 -1  0 -1  1  1  1  7 3.8064   425
  3  1  1 15 -1  0 -1  1  2  1  7 3.8064   426
  1  2  1  7  1  0  1  3  1  1 15 3.8064   427
  3  2  1  7 -1  0 -1  1  1  1 15 3.8064   427
  3  2  1  7 -1  0 -1  1  2  1 15 3.8064   428
  2  1  1  5 -1  0  0  2  2  1 20 3.8094   430
  2  2  1 20  1  0  0  2  1  1  5 3.8094   431
  1  1  1  5  1  0  0  1  2  1 20 3.8094   430
  1  2  1 20 -1  0  0  1  1  1  5 3.8094   431
  1  2  1  5  1  0  0  1  2  1 20 3.8094   432
  1  2  1 20 -1  0  0  1  2  1  5 3.8094   432
  2  2  1  5 -1  0  0  2  2  1 20 3.8094   432
  2  2  1 20  1  0  0  2  2  1  5 3.8094   432
  3  1  1  5 -1  0  0  3  2  1 20 3.8094   430
  4  1  1  5  1  0  0  4  2  1 20 3.8094   430
  3  2  1 20  1  0  0  3  1  1  5 3.8094   431
  4  2  1 20 -1  0  0  4  1  1  5 3.8094   431
  4  2  1  5  1  0  0  4  2  1 20 3.8094   432
  4  2  1 20 -1  0  0  4  2  1  5 3.8094   432
  3  2  1  5 -1  0  0  3  2  1 20 3.8094   432
  3  2  1 20  1  0  0  3  2  1  5 3.8094   432
  1  1  1  8  1 -1  0  2  1  1 13 3.8100   429
  1  1  1 13  1  0  0  2  1  1  8 3.8100   429
  2  1  1  8 -1  0  0  1  1  1 13 3.8100   429
  2  1  1 13 -1  1  0  1  1  1  8 3.8100   429
  3  1  1  8 -1  1  0  4  1  1 13 3.8100   429
  4  1  1 13  1 -1  0  3  1  1  8 3.8100   429
  2  1  1  8 -1  0  0  1  2  1 13 3.8100   430
  2  1  1 13 -1  1  0  1  2  1  8 3.8100   430
  3  1  1  8 -1  1  0  4  2  1 13 3.8100   430
  4  1  1 13  1 -1  0  3  2  1  8 3.8100   430
  1  2  1  8  1 -1  0  2  1  1 13 3.8100   431
  1  2  1 13  1  0  0  2  1  1  8 3.8100   431
  3  2  1  8 -1  1  0  4  1  1 13 3.8100   431
  4  2  1 13  1 -1  0  3  1  1  8 3.8100   431
  3  2  1  8 -1  1  0  4  2  1 13 3.8100   432
  4  2  1 13  1 -1  0  3  2  1  8 3.8100   432
  3  1  1 13 -1  0  0  4  1  1  8 3.8100   429
  4  1  1  8  1  0  0  3  1  1 13 3.8100   429
  1  1  1  8  1 -1  0  2  2  1 13 3.8100   430
  1  1  1 13  1  0  0  2  2  1  8 3.8100   430
  4  1  1  8  1  0  0  3  2  1 13 3.8100   430
  2  2  1  8 -1  0  0  1  1  1 13 3.8100   431
  2  2  1 13 -1  1  0  1  1  1  8 3.8100   431
  3  2  1 13 -1  0  0  4  1  1  8 3.8100   431
  1  2  1  8  1 -1  0  2  2  1 13 3.8100   432
  1  2  1 13  1  0  0  2  2  1  8 3.8100   432
  2  2  1  8 -1  0  0  1  2  1 13 3.8100   432
  2  2  1 13 -1  1  0  1  2  1  8 3.8100   432
  3  1  1 13 -1  0  0  4  2  1  8 3.8100   430
  4  2  1  8  1  0  0  3  1  1 13 3.8100   431
  3  2  1 13 -1  0  0  4  2  1  8 3.8100   432
  4  2  1  8  1  0  0  3  2  1 13 3.8100   432
  2  1  1 21 -1  0  0  2  2  1 12 3.8104   430
  2  2  1 12  1  0  0  2  1  1 21 3.8104   431
  2  1  1 12  1  0  0  2  1  1 21 3.8104   429
  2  1  1 21 -1  0  0  2  1  1 12 3.8104   429
  1  1  1 12 -1  0  0  1  1  1 21 3.8104   429
  1  1  1 21  1  0  0  1  1  1 12 3.8104   429
  3  1  1 12  1  0  0  3  1  1 21 3.8104   429
  3  1  1 21 -1  0  0  3  1  1 12 3.8104   429
  1  1  1 21  1  0  0  1  2  1 12 3.8104   430
  3  1  1 21 -1  0  0  3  2  1 12 3.8104   430
  4  1  1 21  1  0  0  4  2  1 12 3.8104   430
  1  2  1 12 -1  0  0  1  1  1 21 3.8104   431
  3  2  1 12  1  0  0  3  1  1 21 3.8104   431
  4  2  1 12 -1  0  0  4  1  1 21 3.8104   431
  4  1  1 12 -1  0  0  4  1  1 21 3.8104   429
  4  1  1 21  1  0  0  4  1  1 12 3.8104   429
  4  1  1 21  1 -1  0  2  2  1  8 3.8110   430
  2  2  1  8 -1  1  0  4  1  1 21 3.8110   431
  2  1  1  8 -1  1  0  4  1  1 21 3.8110   429
  4  1  1 21  1 -1  0  2  1  1  8 3.8110   429
  2  1  1 21 -1  1  0  4  1  1  8 3.8110   429
  4  1  1  8  1 -1  0  2  1  1 21 3.8110   429
  1  1  1 21  1  0  1  3  2  1  8 3.8110   430
  2  1  1 21 -1  1  0  4  2  1  8 3.8110   430
  3  2  1  8 -1  0 -1  1  1  1 21 3.8110   431
  4  2  1  8  1 -1  0  2  1  1 21 3.8110   431
  1  1  1  8  1  0  1  3  1  1 21 3.8110   429
  1  1  1 21  1  0  1  3  1  1  8 3.8110   429
  3  1  1  8 -1  0 -1  1  1  1 21 3.8110   429
  3  1  1 21 -1  0 -1  1  1  1  8 3.8110   429
  3  1  1 21 -1  0 -1  1  2  1  8 3.8110   430
  1  2  1  8  1  0  1  3  1  1 21 3.8110   431
  3  1  1  9 -1  1  0  4  1  1 14 3.8137   429
  3  1  1 14 -1  0  0  4  1  1  9 3.8137   429
  4  1  1  9  1  0  0  3  1  1 14 3.8137   429
  4  1  1 14  1 -1  0  3  1  1  9 3.8137   429
  4  1  1 14  1 -1  0  3  2  1  9 3.8137   430
  3  2  1  9 -1  1  0  4  1  1 14 3.8137   431
  1  1  1  9  1 -1  0  2  1  1 14 3.8137   429
  1  1  1 14  1  0  0  2  1  1  9 3.8137   429
  2  1  1  9 -1  0  0  1  1  1 14 3.8137   429
  2  1  1 14 -1  1  0  1  1  1  9 3.8137   429
  1  1  1  9  1 -1  0  2  2  1 14 3.8137   430
  2  1  1  9 -1  0  0  1  2  1 14 3.8137   430
  2  1  1 14 -1  1  0  1  2  1  9 3.8137   430
  3  1  1  9 -1  1  0  4  2  1 14 3.8137   430
  4  1  1  9  1  0  0  3  2  1 14 3.8137   430
  1  2  1  9  1 -1  0  2  1  1 14 3.8137   431
  1  2  1 14  1  0  0  2  1  1  9 3.8137   431
  2  2  1 14 -1  1  0  1  1  1  9 3.8137   431
  3  2  1 14 -1  0  0  4  1  1  9 3.8137   431
  4  2  1 14  1 -1  0  3  1  1  9 3.8137   431
  1  2  1  9  1 -1  0  2  2  1 14 3.8137   432
  2  2  1 14 -1  1  0  1  2  1  9 3.8137   432
  3  2  1  9 -1  1  0  4  2  1 14 3.8137   432
  4  2  1 14  1 -1  0  3  2  1  9 3.8137   432
  1  1  1 14  1  0  0  2  2  1  9 3.8137   430
  3  1  1 14 -1  0  0  4  2  1  9 3.8137   430
  2  2  1  9 -1  0  0  1  1  1 14 3.8137   431
  4  2  1  9  1  0  0  3  1  1 14 3.8137   431
  1  2  1 14  1  0  0  2  2  1  9 3.8137   432
  2  2  1  9 -1  0  0  1  2  1 14 3.8137   432
  3  2  1 14 -1  0  0  4  2  1  9 3.8137   432
  4  2  1  9  1  0  0  3  2  1 14 3.8137   432
  2  1  1 15 -1  1  0  4  1  1  3 3.8197   433
  4  1  1  3  1 -1  0  2  1  1 15 3.8197   433
  2  1  1 15 -1  1  0  4  2  1  3 3.8197   434
  4  1  1  3  1 -1  0  2  2  1 15 3.8197   434
  2  2  1 15 -1  1  0  4  1  1  3 3.8197   435
  4  2  1  3  1 -1  0  2  1  1 15 3.8197   435
  2  2  1  3 -1  1  0  4  2  1 15 3.8197   436
  2  2  1 15 -1  1  0  4  2  1  3 3.8197   436
  4  2  1  3  1 -1  0  2  2  1 15 3.8197   436
  4  2  1 15  1 -1  0  2  2  1  3 3.8197   436
  1  1  1  3  1  0  1  3  2  1 15 3.8197   434
  1  1  1 15  1  0  1  3  2  1  3 3.8197   434
  2  1  1  3 -1  1  0  4  2  1 15 3.8197   434
  4  1  1 15  1 -1  0  2  2  1  3 3.8197   434
  2  2  1  3 -1  1  0  4  1  1 15 3.8197   435
  3  2  1  3 -1  0 -1  1  1  1 15 3.8197   435
  3  2  1 15 -1  0 -1  1  1  1  3 3.8197   435
  4  2  1 15  1 -1  0  2  1  1  3 3.8197   435
  1  2  1  3  1  0  1  3  2  1 15 3.8197   436
  1  2  1 15  1  0  1  3  2  1  3 3.8197   436
  3  2  1  3 -1  0 -1  1  2  1 15 3.8197   436
  3  2  1 15 -1  0 -1  1  2  1  3 3.8197   436
  1  1  1  3  1  0  1  3  1  1 15 3.8197   433
  1  1  1 15  1  0  1  3  1  1  3 3.8197   433
  2  1  1  3 -1  1  0  4  1  1 15 3.8197   433
  3  1  1  3 -1  0 -1  1  1  1 15 3.8197   433
  3  1  1 15 -1  0 -1  1  1  1  3 3.8197   433
  4  1  1 15  1 -1  0  2  1  1  3 3.8197   433
  3  1  1  3 -1  0 -1  1  2  1 15 3.8197   434
  3  1  1 15 -1  0 -1  1  2  1  3 3.8197   434
  1  2  1  3  1  0  1  3  1  1 15 3.8197   435
  1  2  1 15  1  0  1  3  1  1  3 3.8197   435
  3  1  1 12  0  0  0  2  2  1 20 3.8227   434
  4  1  1 12  0  0 -1  1  2  1 20 3.8227   434
  1  2  1 20  0  0  1  4  1  1 12 3.8227   435
  2  2  1 20  0  0  0  3  1  1 12 3.8227   435
  2  2  1 20  0  0  0  3  2  1 12 3.8227   436
  3  2  1 12  0  0  0  2  2  1 20 3.8227   436
  1  1  1 12  0  0  0  4  2  1 20 3.8227   434
  4  2  1 20  0  0  0  1  1  1 12 3.8227   435
  1  2  1 12  0  0  0  4  2  1 20 3.8227   436
  1  2  1 20  0  0  1  4  2  1 12 3.8227   436
  4  2  1 12  0  0 -1  1  2  1 20 3.8227   436
  4  2  1 20  0  0  0  1  2  1 12 3.8227   436
  3  2  1 20  0  0 -1  2  1  1 12 3.8227   435
  2  1  1 12  0  0  1  3  2  1 20 3.8227   434
  2  2  1 12  0  0  1  3  2  1 20 3.8227   436
  3  2  1 20  0  0 -1  2  2  1 12 3.8227   436
  3  1  1 13  0  0  0  2  2  1 20 3.8235   434
  2  2  1 20  0  0  0  3  1  1 13 3.8235   435
  4  1  1 13  0  0 -1  1  2  1 20 3.8235   434
  1  2  1 20  0  0  1  4  1  1 13 3.8235   435
  2  2  1 20  0  0  0  3  2  1 13 3.8235   436
  3  2  1 13  0  0  0  2  2  1 20 3.8235   436
  1  1  1 13  0  0  0  4  2  1 20 3.8235   434
  2  1  1 13  0  0  1  3  2  1 20 3.8235   434
  3  2  1 20  0  0 -1  2  1  1 13 3.8235   435
  4  2  1 20  0  0  0  1  1  1 13 3.8235   435
  1  2  1 13  0  0  0  4  2  1 20 3.8235   436
  1  2  1 20  0  0  1  4  2  1 13 3.8235   436
  2  2  1 13  0  0  1  3  2  1 20 3.8235   436
  3  2  1 20  0  0 -1  2  2  1 13 3.8235   436
  4  2  1 13  0  0 -1  1  2  1 20 3.8235   436
  4  2  1 20  0  0  0  1  2  1 13 3.8235   436
  2  1  1  9 -1  1  0  4  1  1  3 3.8299   437
  4  1  1  3  1 -1  0  2  1  1  9 3.8299   437
  4  1  1  3  1 -1  0  2  2  1  9 3.8299   438
  2  2  1  9 -1  1  0  4  1  1  3 3.8299   439
  2  2  1  3 -1  1  0  4  2  1  9 3.8299   440
  2  2  1  9 -1  1  0  4  2  1  3 3.8299   440
  4  2  1  3  1 -1  0  2  2  1  9 3.8299   440
  4  2  1  9  1 -1  0  2  2  1  3 3.8299   440
  1  1  1  3  1  0  1  3  1  1  9 3.8299   437
  3  1  1  9 -1  0 -1  1  1  1  3 3.8299   437
  1  1  1  9  1  0  1  3  2  1  3 3.8299   438
  2  1  1  3 -1  1  0  4  2  1  9 3.8299   438
  2  1  1  9 -1  1  0  4  2  1  3 3.8299   438
  3  1  1  9 -1  0 -1  1  2  1  3 3.8299   438
  4  1  1  9  1 -1  0  2  2  1  3 3.8299   438
  1  2  1  3  1  0  1  3  1  1  9 3.8299   439
  2  2  1  3 -1  1  0  4  1  1  9 3.8299   439
  3  2  1  3 -1  0 -1  1  1  1  9 3.8299   439
  4  2  1  3  1 -1  0  2  1  1  9 3.8299   439
  4  2  1  9  1 -1  0  2  1  1  3 3.8299   439
  1  2  1  9  1  0  1  3  2  1  3 3.8299   440
  3  2  1  3 -1  0 -1  1  2  1  9 3.8299   440
  1  1  1  9  1  0  1  3  1  1  3 3.8299   437
  2  1  1  3 -1  1  0  4  1  1  9 3.8299   437
  3  1  1  3 -1  0 -1  1  1  1  9 3.8299   437
  4  1  1  9  1 -1  0  2  1  1  3 3.8299   437
  1  1  1  3  1  0  1  3  2  1  9 3.8299   438
  3  1  1  3 -1  0 -1  1  2  1  9 3.8299   438
  1  2  1  9  1  0  1  3  1  1  3 3.8299   439
  3  2  1  9 -1  0 -1  1  1  1  3 3.8299   439
  1  2  1  3  1  0  1  3  2  1  9 3.8299   440
  3  2  1  9 -1  0 -1  1  2  1  3 3.8299   440
  2  2  1  9 -1  1  0  4  2  1 21 3.8311   440
  4  2  1 21  1 -1  0  2  2  1  9 3.8311   440
  1  1  1  9  1  0  1  3  2  1 21 3.8311   438
  2  1  1  9 -1  1  0  4  2  1 21 3.8311   438
  3  2  1 21 -1  0 -1  1  1  1  9 3.8311   439
  4  2  1 21  1 -1  0  2  1  1  9 3.8311   439
  1  2  1  9  1  0  1  3  2  1 21 3.8311   440
  2  2  1 21 -1  1  0  4  2  1  9 3.8311   440
  3  2  1 21 -1  0 -1  1  2  1  9 3.8311   440
  4  2  1  9  1 -1  0  2  2  1 21 3.8311   440
  3  1  1  9 -1  0 -1  1  2  1 21 3.8311   438
  4  1  1  9  1 -1  0  2  2  1 21 3.8311   438
  2  2  1 21 -1  1  0  4  1  1  9 3.8311   439
  1  2  1 21  1  0  1  3  2  1  9 3.8311   440
  3  2  1  9 -1  0 -1  1  2  1 21 3.8311   440
  1  2  1 21  1  0  1  3  1  1  9 3.8311   439
  3  1  1 12  0  0  0  4  2  1 20 3.8384   442
  4  2  1 20  0  0  0  3  1  1 12 3.8384   443
  3  2  1 20  0  1  0  4  2  1 12 3.8384   444
  4  2  1 12  0 -1  0  3  2  1 20 3.8384   444
  2  1  1 12  0  1  0  1  2  1 20 3.8385   442
  4  1  1 12  0 -1  0  3  2  1 20 3.8385   442
  1  2  1 20  0 -1  0  2  1  1 12 3.8385   443
  3  2  1 20  0  1  0  4  1  1 12 3.8385   443
  3  2  1 12  0  0  0  4  2  1 20 3.8385   444
  4  2  1 20  0  0  0  3  2  1 12 3.8385   444
  1  1  1 12  0  0  0  2  2  1 20 3.8385   442
  2  2  1 20  0  0  0  1  1  1 12 3.8385   443
  1  2  1 12  0  0  0  2  2  1 20 3.8385   444
  1  2  1 20  0 -1  0  2  2  1 12 3.8385   444
  2  2  1 12  0  1  0  1  2  1 20 3.8385   444
  2  2  1 20  0  0  0  1  2  1 12 3.8385   444
  2  1  1 13 -1  1  0  4  1  1  6 3.8440   445
  4  1  1  6  1 -1  0  2  1  1 13 3.8440   445
  2  1  1 13 -1  1  0  4  2  1  6 3.8440   446
  4  1  1  6  1 -1  0  2  2  1 13 3.8440   446
  2  2  1 13 -1  1  0  4  1  1  6 3.8440   447
  4  2  1  6  1 -1  0  2  1  1 13 3.8440   447
  2  2  1  6 -1  1  0  4  2  1 13 3.8440   448
  2  2  1 13 -1  1  0  4  2  1  6 3.8440   448
  4  2  1  6  1 -1  0  2  2  1 13 3.8440   448
  4  2  1 13  1 -1  0  2  2  1  6 3.8440   448
  3  1  1  6 -1  0 -1  1  1  1 13 3.8440   445
  1  1  1  6  1  0  1  3  2  1 13 3.8440   446
  1  1  1 13  1  0  1  3  2  1  6 3.8440   446
  2  1  1  6 -1  1  0  4  2  1 13 3.8440   446
  3  1  1  6 -1  0 -1  1  2  1 13 3.8440   446
  4  1  1 13  1 -1  0  2  2  1  6 3.8440   446
  2  2  1  6 -1  1  0  4  1  1 13 3.8440   447
  3  2  1  6 -1  0 -1  1  1  1 13 3.8440   447
  3  2  1 13 -1  0 -1  1  1  1  6 3.8440   447
  4  2  1 13  1 -1  0  2  1  1  6 3.8440   447
  1  2  1  6  1  0  1  3  2  1 13 3.8440   448
  1  2  1 13  1  0  1  3  2  1  6 3.8440   448
  3  2  1  6 -1  0 -1  1  2  1 13 3.8440   448
  3  2  1 13 -1  0 -1  1  2  1  6 3.8440   448
  1  1  1  6  1  0  1  3  1  1 13 3.8440   445
  1  1  1 13  1  0  1  3  1  1  6 3.8440   445
  2  1  1  6 -1  1  0  4  1  1 13 3.8440   445
  3  1  1 13 -1  0 -1  1  1  1  6 3.8440   445
  4  1  1 13  1 -1  0  2  1  1  6 3.8440   445
  3  1  1 13 -1  0 -1  1  2  1  6 3.8440   446
  1  2  1  6  1  0  1  3  1  1 13 3.8440   447
  1  2  1 13  1  0  1  3  1  1  6 3.8440   447
  2  1  1 12 -1  1  0  4  1  1  5 3.8505   449
  4  1  1  5  1 -1  0  2  1  1 12 3.8505   449
  4  1  1  5  1 -1  0  2  2  1 12 3.8505   450
  2  2  1 12 -1  1  0  4  1  1  5 3.8505   451
  1  1  1 12  1  0  1  3  2  1  5 3.8505   450
  2  1  1 12 -1  1  0  4  2  1  5 3.8505   450
  3  2  1  5 -1  0 -1  1  1  1 12 3.8505   451
  4  2  1  5  1 -1  0  2  1  1 12 3.8505   451
  1  2  1 12  1  0  1  3  2  1  5 3.8505   452
  2  2  1  5 -1  1  0  4  2  1 12 3.8505   452
  2  2  1 12 -1  1  0  4  2  1  5 3.8505   452
  3  2  1  5 -1  0 -1  1  2  1 12 3.8505   452
  4  2  1  5  1 -1  0  2  2  1 12 3.8505   452
  4  2  1 12  1 -1  0  2  2  1  5 3.8505   452
  1  1  1  5  1  0  1  3  1  1 12 3.8505   449
  1  1  1 12  1  0  1  3  1  1  5 3.8505   449
  3  1  1  5 -1  0 -1  1  1  1 12 3.8505   449
  3  1  1 12 -1  0 -1  1  1  1  5 3.8505   449
  1  1  1  5  1  0  1  3  2  1 12 3.8505   450
  2  1  1  5 -1  1  0  4  2  1 12 3.8505   450
  3  1  1  5 -1  0 -1  1  2  1 12 3.8505   450
  3  1  1 12 -1  0 -1  1  2  1  5 3.8505   450
  4  1  1 12  1 -1  0  2  2  1  5 3.8505   450
  1  2  1  5  1  0  1  3  1  1 12 3.8505   451
  1  2  1 12  1  0  1  3  1  1  5 3.8505   451
  2  2  1  5 -1  1  0  4  1  1 12 3.8505   451
  3  2  1 12 -1  0 -1  1  1  1  5 3.8505   451
  4  2  1 12  1 -1  0  2  1  1  5 3.8505   451
  1  2  1  5  1  0  1  3  2  1 12 3.8505   452
  3  2  1 12 -1  0 -1  1  2  1  5 3.8505   452
  2  1  1  5 -1  1  0  4  1  1 12 3.8506   449
  4  1  1 12  1 -1  0  2  1  1  5 3.8506   449
  4  1  1 14  1 -1  0  2  2  1  7 3.8605   454
  2  2  1  7 -1  1  0  4  1  1 14 3.8605   455
  2  2  1  7 -1  1  0  4  2  1 14 3.8605   456
  4  2  1 14  1 -1  0  2  2  1  7 3.8605   456
  2  1  1  7 -1  1  0  4  1  1 14 3.8605   453
  2  1  1 14 -1  1  0  4  1  1  7 3.8605   453
  4  1  1  7  1 -1  0  2  1  1 14 3.8605   453
  4  1  1 14  1 -1  0  2  1  1  7 3.8605   453
  1  1  1  7  1  0  1  3  2  1 14 3.8605   454
  1  1  1 14  1  0  1  3  2  1  7 3.8605   454
  2  1  1  7 -1  1  0  4  2  1 14 3.8605   454
  2  1  1 14 -1  1  0  4  2  1  7 3.8605   454
  4  1  1  7  1 -1  0  2  2  1 14 3.8605   454
  2  2  1 14 -1  1  0  4  1  1  7 3.8605   455
  3  2  1  7 -1  0 -1  1  1  1 14 3.8605   455
  3  2  1 14 -1  0 -1  1  1  1  7 3.8605   455
  4  2  1  7  1 -1  0  2  1  1 14 3.8605   455
  4  2  1 14  1 -1  0  2  1  1  7 3.8605   455
  1  2  1  7  1  0  1  3  2  1 14 3.8605   456
  1  2  1 14  1  0  1  3  2  1  7 3.8605   456
  2  2  1 14 -1  1  0  4  2  1  7 3.8605   456
  3  2  1  7 -1  0 -1  1  2  1 14 3.8605   456
  3  2  1 14 -1  0 -1  1  2  1  7 3.8605   456
  4  2  1  7  1 -1  0  2  2  1 14 3.8605   456
  1  1  1  7  1  0  1  3  1  1 14 3.8606   453
  1  1  1 14  1  0  1  3  1  1  7 3.8606   453
  3  1  1  7 -1  0 -1  1  1  1 14 3.8606   453
  3  1  1 14 -1  0 -1  1  1  1  7 3.8606   453
  3  1  1  7 -1  0 -1  1  2  1 14 3.8606   454
  3  1  1 14 -1  0 -1  1  2  1  7 3.8606   454
  1  2  1  7  1  0  1  3  1  1 14 3.8606   455
  1  2  1 14  1  0  1  3  1  1  7 3.8606   455
  3  1  1 12  0  0  0  4  1  1 20 3.8676   457
  4  1  1 20  0  0  0  3  1  1 12 3.8676   457
  3  1  1 20  0  1  0  4  2  1 12 3.8676   458
  4  1  1 20  0  0  0  3  2  1 12 3.8676   458
  3  2  1 12  0  0  0  4  1  1 20 3.8676   459
  4  2  1 12  0 -1  0  3  1  1 20 3.8676   459
  1  1  1 12  0  0  0  2  1  1 20 3.8676   457
  1  1  1 20  0 -1  0  2  1  1 12 3.8676   457
  2  1  1 12  0  1  0  1  1  1 20 3.8676   457
  2  1  1 20  0  0  0  1  1  1 12 3.8676   457
  3  1  1 20  0  1  0  4  1  1 12 3.8676   457
  4  1  1 12  0 -1  0  3  1  1 20 3.8676   457
  1  1  1 20  0 -1  0  2  2  1 12 3.8676   458
  2  1  1 20  0  0  0  1  2  1 12 3.8676   458
  1  2  1 12  0  0  0  2  1  1 20 3.8676   459
  2  2  1 12  0  1  0  1  1  1 20 3.8676   459
  2  1  1  5 -1  0  0  2  1  1 20 3.8723   457
  2  1  1 20  1  0  0  2  1  1  5 3.8723   457
  1  1  1  5  1  0  0  1  1  1 20 3.8723   457
  1  1  1 20 -1  0  0  1  1  1  5 3.8723   457
  3  1  1  5 -1  0  0  3  1  1 20 3.8723   457
  3  1  1 20  1  0  0  3  1  1  5 3.8723   457
  1  1  1 20 -1  0  0  1  2  1  5 3.8723   458
  2  1  1 20  1  0  0  2  2  1  5 3.8723   458
  1  2  1  5  1  0  0  1  1  1 20 3.8723   459
  2  2  1  5 -1  0  0  2  1  1 20 3.8723   459
  3  1  1 20  1  0  0  3  2  1  5 3.8723   458
  3  2  1  5 -1  0  0  3  1  1 20 3.8723   459
  4  1  1  5  1  0  0  4  1  1 20 3.8723   457
  4  1  1 20 -1  0  0  4  1  1  5 3.8723   457
  4  1  1 20 -1  0  0  4  2  1  5 3.8723   458
  4  2  1  5  1  0  0  4  1  1 20 3.8723   459
  1  1  1  5  1  0  1  4  1  1 12 3.8733   461
  2  1  1  5 -1  0  0  3  1  1 12 3.8733   461
  3  1  1 12  1  0  0  2  1  1  5 3.8733   461
  4  1  1 12 -1  0 -1  1  1  1  5 3.8733   461
  2  1  1  5 -1  0  0  3  2  1 12 3.8733   462
  3  1  1 12  1  0  0  2  2  1  5 3.8733   462
  2  2  1  5 -1  0  0  3  1  1 12 3.8733   463
  3  2  1 12  1  0  0  2  1  1  5 3.8733   463
  1  1  1 12 -1  0  0  4  1  1  5 3.8733   461
  2  1  1 12  1  0  1  3  1  1  5 3.8733   461
  3  1  1  5 -1  0 -1  2  1  1 12 3.8733   461
  4  1  1  5  1  0  0  1  1  1 12 3.8733   461
  1  1  1  5  1  0  1  4  2  1 12 3.8733   462
  1  1  1 12 -1  0  0  4  2  1  5 3.8733   462
  2  1  1 12  1  0  1  3  2  1  5 3.8733   462
  3  1  1  5 -1  0 -1  2  2  1 12 3.8733   462
  4  1  1  5  1  0  0  1  2  1 12 3.8733   462
  4  1  1 12 -1  0 -1  1  2  1  5 3.8733   462
  1  2  1  5  1  0  1  4  1  1 12 3.8733   463
  1  2  1 12 -1  0  0  4  1  1  5 3.8733   463
  2  2  1 12  1  0  1  3  1  1  5 3.8733   463
  3  2  1  5 -1  0 -1  2  1  1 12 3.8733   463
  4  2  1  5  1  0  0  1  1  1 12 3.8733   463
  4  2  1 12 -1  0 -1  1  1  1  5 3.8733   463
  1  2  1  5  1  0  1  4  2  1 12 3.8733   464
  1  2  1 12 -1  0  0  4  2  1  5 3.8733   464
  2  2  1  5 -1  0  0  3  2  1 12 3.8733   464
  2  2  1 12  1  0  1  3  2  1  5 3.8733   464
  3  2  1  5 -1  0 -1  2  2  1 12 3.8733   464
  3  2  1 12  1  0  0  2  2  1  5 3.8733   464
  4  2  1  5  1  0  0  1  2  1 12 3.8733   464
  4  2  1 12 -1  0 -1  1  2  1  5 3.8733   464
  1  1  1 12 -1  0  0  1  2  1 21 3.8739   462
  2  1  1 12  1  0  0  2  2  1 21 3.8739   462
  1  2  1 21  1  0  0  1  1  1 12 3.8739   463
  2  2  1 21 -1  0  0  2  1  1 12 3.8739   463
  1  2  1 12 -1  0  0  1  2  1 21 3.8739   464
  1  2  1 21  1  0  0  1  2  1 12 3.8739   464
  2  2  1 12  1  0  0  2  2  1 21 3.8739   464
  2  2  1 21 -1  0  0  2  2  1 12 3.8739   464
  4  2  1 12 -1  0  0  4  2  1 21 3.8739   464
  4  2  1 21  1  0  0  4  2  1 12 3.8739   464
  3  1  1 12  1  0  0  3  2  1 21 3.8739   462
  3  2  1 21 -1  0  0  3  1  1 12 3.8739   463
  3  2  1 12  1  0  0  3  2  1 21 3.8739   464
  3  2  1 21 -1  0  0  3  2  1 12 3.8739   464
  4  1  1 12 -1  0  0  4  2  1 21 3.8739   462
  4  2  1 21  1  0  0  4  1  1 12 3.8739   463
  2  1  1 10 -1  1  0  4  1  1  3 3.8745   461
  4  1  1  3  1 -1  0  2  1  1 10 3.8745   461
  4  1  1  3  1 -1  0  2  2  1 10 3.8745   462
  2  2  1 10 -1  1  0  4  1  1  3 3.8745   463
  2  2  1 10 -1  1  0  4  2  1  3 3.8745   464
  4  2  1  3  1 -1  0  2  2  1 10 3.8745   464
  1  1  1 10  1  0  1  3  2  1  3 3.8745   462
  2  1  1  3 -1  1  0  4  2  1 10 3.8745   462
  2  1  1 10 -1  1  0  4  2  1  3 3.8745   462
  4  1  1 10  1 -1  0  2  2  1  3 3.8745   462
  2  2  1  3 -1  1  0  4  1  1 10 3.8745   463
  3  2  1  3 -1  0 -1  1  1  1 10 3.8745   463
  4  2  1  3  1 -1  0  2  1  1 10 3.8745   463
  4  2  1 10  1 -1  0  2  1  1  3 3.8745   463
  1  2  1 10  1  0  1  3  2  1  3 3.8745   464
  2  2  1  3 -1  1  0  4  2  1 10 3.8745   464
  3  2  1  3 -1  0 -1  1  2  1 10 3.8745   464
  4  2  1 10  1 -1  0  2  2  1  3 3.8745   464
  1  1  1  3  1  0  1  3  1  1 10 3.8745   461
  1  1  1 10  1  0  1  3  1  1  3 3.8745   461
  2  1  1  3 -1  1  0  4  1  1 10 3.8745   461
  3  1  1  3 -1  0 -1  1  1  1 10 3.8745   461
  3  1  1 10 -1  0 -1  1  1  1  3 3.8745   461
  4  1  1 10  1 -1  0  2  1  1  3 3.8745   461
  1  1  1  3  1  0  1  3  2  1 10 3.8745   462
  3  1  1  3 -1  0 -1  1  2  1 10 3.8745   462
  3  1  1 10 -1  0 -1  1  2  1  3 3.8745   462
  1  2  1  3  1  0  1  3  1  1 10 3.8745   463
  1  2  1 10  1  0  1  3  1  1  3 3.8745   463
  3  2  1 10 -1  0 -1  1  1  1  3 3.8745   463
  1  2  1  3  1  0  1  3  2  1 10 3.8745   464
  3  2  1 10 -1  0 -1  1  2  1  3 3.8745   464
  2  2  1 20 -1  1  0  4  2  1 21 3.8765   464
  4  2  1 21  1 -1  0  2  2  1 20 3.8765   464
  1  2  1 20  1  0  1  3  2  1 21 3.8765   464
  3  2  1 21 -1  0 -1  1  2  1 20 3.8765   464
  2  2  1 21 -1  1  0  4  2  1 20 3.8765   464
  4  2  1 20  1 -1  0  2  2  1 21 3.8765   464
  1  2  1 21  1  0  1  3  2  1 20 3.8765   464
  3  2  1 20 -1  0 -1  1  2  1 21 3.8765   464
  2  1  1  9 -1  1  0  4  1  1 21 3.8770   461
  4  1  1 21  1 -1  0  2  1  1  9 3.8770   461
  4  1  1 21  1 -1  0  2  2  1  9 3.8770   462
  2  2  1  9 -1  1  0  4  1  1 21 3.8770   463
  2  1  1 21 -1  1  0  4  2  1  9 3.8770   462
  4  2  1  9  1 -1  0  2  1  1 21 3.8770   463
  1  1  1  9  1  0  1  3  1  1 21 3.8770   461
  1  1  1 21  1  0  1  3  1  1  9 3.8770   461
  2  1  1 21 -1  1  0  4  1  1  9 3.8770   461
  3  1  1  9 -1  0 -1  1  1  1 21 3.8770   461
  3  1  1 21 -1  0 -1  1  1  1  9 3.8770   461
  4  1  1  9  1 -1  0  2  1  1 21 3.8770   461
  1  1  1 21  1  0  1  3  2  1  9 3.8770   462
  3  1  1 21 -1  0 -1  1  2  1  9 3.8770   462
  1  2  1  9  1  0  1  3  1  1 21 3.8770   463
  3  2  1  9 -1  0 -1  1  1  1 21 3.8770   463
  2  1  1 11 -1  1  0  4  1  1  4 3.8784   465
  4  1  1  4  1 -1  0  2  1  1 11 3.8784   465
  4  1  1  4  1 -1  0  2  2  1 11 3.8784   466
  2  2  1 11 -1  1  0  4  1  1  4 3.8784   467
  2  1  1 11 -1  1  0  4  2  1  4 3.8784   466
  4  2  1  4  1 -1  0  2  1  1 11 3.8784   467
  2  2  1 11 -1  1  0  4  2  1  4 3.8784   468
  4  2  1  4  1 -1  0  2  2  1 11 3.8784   468
  1  1  1 11  1  0  1  3  2  1  4 3.8784   466
  3  2  1  4 -1  0 -1  1  1  1 11 3.8784   467
  1  2  1 11  1  0  1  3  2  1  4 3.8784   468
  2  2  1  4 -1  1  0  4  2  1 11 3.8784   468
  3  2  1  4 -1  0 -1  1  2  1 11 3.8784   468
  4  2  1 11  1 -1  0  2  2  1  4 3.8784   468
  1  1  1  4  1  0  1  3  1  1 11 3.8784   465
  1  1  1 11  1  0  1  3  1  1  4 3.8784   465
  3  1  1  4 -1  0 -1  1  1  1 11 3.8784   465
  3  1  1 11 -1  0 -1  1  1  1  4 3.8784   465
  1  1  1  4  1  0  1  3  2  1 11 3.8784   466
  2  1  1  4 -1  1  0  4  2  1 11 3.8784   466
  3  1  1  4 -1  0 -1  1  2  1 11 3.8784   466
  3  1  1 11 -1  0 -1  1  2  1  4 3.8784   466
  4  1  1 11  1 -1  0  2  2  1  4 3.8784   466
  1  2  1  4  1  0  1  3  1  1 11 3.8784   467
  1  2  1 11  1  0  1  3  1  1  4 3.8784   467
  2  2  1  4 -1  1  0  4  1  1 11 3.8784   467
  3  2  1 11 -1  0 -1  1  1  1  4 3.8784   467
  4  2  1 11  1 -1  0  2  1  1  4 3.8784   467
  1  2  1  4  1  0  1  3  2  1 11 3.8784   468
  3  2  1 11 -1  0 -1  1  2  1  4 3.8784   468
  2  1  1  4 -1  1  0  4  1  1 11 3.8784   465
  4  1  1 11  1 -1  0  2  1  1  4 3.8784   465
  2  1  1 20  0  0  0  3  1  1 13 3.8816   465
  3  1  1 13  0  0  0  2  1  1 20 3.8816   465
  1  1  1 20  0  0  1  4  1  1 13 3.8816   465
  4  1  1 13  0  0 -1  1  1  1 20 3.8816   465
  2  1  1 20  0  0  0  3  2  1 13 3.8816   466
  3  2  1 13  0  0  0  2  1  1 20 3.8816   467
  1  1  1 13  0  0  0  4  1  1 20 3.8816   465
  2  1  1 13  0  0  1  3  1  1 20 3.8816   465
  3  1  1 20  0  0 -1  2  1  1 13 3.8816   465
  4  1  1 20  0  0  0  1  1  1 13 3.8816   465
  1  1  1 20  0  0  1  4  2  1 13 3.8816   466
  3  1  1 20  0  0 -1  2  2  1 13 3.8816   466
  4  1  1 20  0  0  0  1  2  1 13 3.8816   466
  1  2  1 13  0  0  0  4  1  1 20 3.8816   467
  2  2  1 13  0  0  1  3  1  1 20 3.8816   467
  4  2  1 13  0  0 -1  1  1  1 20 3.8816   467
  4  1  1  8  1 -1  0  2  2  1 15 3.8820   466
  4  1  1 15  1 -1  0  2  2  1  8 3.8820   466
  2  2  1  8 -1  1  0  4  1  1 15 3.8820   467
  2  2  1 15 -1  1  0  4  1  1  8 3.8820   467
  2  2  1  8 -1  1  0  4  2  1 15 3.8820   468
  2  2  1 15 -1  1  0  4  2  1  8 3.8820   468
  4  2  1  8  1 -1  0  2  2  1 15 3.8820   468
  4  2  1 15  1 -1  0  2  2  1  8 3.8820   468
  1  1  1 15  1  0  1  3  1  1  8 3.8820   465
  2  1  1  8 -1  1  0  4  1  1 15 3.8820   465
  2  1  1 15 -1  1  0  4  1  1  8 3.8820   465
  3  1  1  8 -1  0 -1  1  1  1 15 3.8820   465
  4  1  1  8  1 -1  0  2  1  1 15 3.8820   465
  4  1  1 15  1 -1  0  2  1  1  8 3.8820   465
  1  1  1  8  1  0  1  3  2  1 15 3.8820   466
  1  1  1 15  1  0  1  3  2  1  8 3.8820   466
  2  1  1  8 -1  1  0  4  2  1 15 3.8820   466
  2  1  1 15 -1  1  0  4  2  1  8 3.8820   466
  3  1  1  8 -1  0 -1  1  2  1 15 3.8820   466
  1  2  1 15  1  0  1  3  1  1  8 3.8820   467
  3  2  1  8 -1  0 -1  1  1  1 15 3.8820   467
  3  2  1 15 -1  0 -1  1  1  1  8 3.8820   467
  4  2  1  8  1 -1  0  2  1  1 15 3.8820   467
  4  2  1 15  1 -1  0  2  1  1  8 3.8820   467
  1  2  1  8  1  0  1  3  2  1 15 3.8820   468
  1  2  1 15  1  0  1  3  2  1  8 3.8820   468
  3  2  1  8 -1  0 -1  1  2  1 15 3.8820   468
  3  2  1 15 -1  0 -1  1  2  1  8 3.8820   468
  1  1  1  8  1  0  1  3  1  1 15 3.8820   465
  3  1  1 15 -1  0 -1  1  1  1  8 3.8820   465
  3  1  1 15 -1  0 -1  1  2  1  8 3.8820   466
  1  2  1  8  1  0  1  3  1  1 15 3.8820   467
  4  1  1  2  1 -1  0  2  2  1  9 3.8876   470
  2  2  1  9 -1  1  0  4  1  1  2 3.8876   471
  2  2  1  9 -1  1  0  4  2  1  2 3.8876   472
  4  2  1  2  1 -1  0  2  2  1  9 3.8876   472
  2  1  1  9 -1  1  0  4  1  1  2 3.8876   469
  4  1  1  2  1 -1  0  2  1  1  9 3.8876   469
  1  1  1  9  1  0  1  3  2  1  2 3.8876   470
  1  1  1 20  1  0  1  3  2  1 21 3.8876   470
  2  1  1  9 -1  1  0  4  2  1  2 3.8876   470
  2  1  1 20 -1  1  0  4  2  1 21 3.8876   470
  3  2  1  2 -1  0 -1  1  1  1  9 3.8876   471
  3  2  1 21 -1  0 -1  1  1  1 20 3.8876   471
  4  2  1  2  1 -1  0  2  1  1  9 3.8876   471
  4  2  1 21  1 -1  0  2  1  1 20 3.8876   471
  1  2  1  9  1  0  1  3  2  1  2 3.8876   472
  2  2  1  2 -1  1  0  4  2  1  9 3.8876   472
  3  2  1  2 -1  0 -1  1  2  1  9 3.8876   472
  4  2  1  9  1 -1  0  2  2  1  2 3.8876   472
  1  1  1  2  1  0  1  3  1  1  9 3.8876   469
  2  1  1  2 -1  1  0  4  1  1  9 3.8876   469
  3  1  1  9 -1  0 -1  1  1  1  2 3.8876   469
  4  1  1  9  1 -1  0  2  1  1  2 3.8876   469
  1  1  1  2  1  0  1  3  2  1  9 3.8876   470
  2  1  1  2 -1  1  0  4  2  1  9 3.8876   470
  3  1  1  9 -1  0 -1  1  2  1  2 3.8876   470
  3  1  1 20 -1  0 -1  1  2  1 21 3.8876   470
  4  1  1  9  1 -1  0  2  2  1  2 3.8876   470
  1  2  1  2  1  0  1  3  1  1  9 3.8876   471
  1  2  1 21  1  0  1  3  1  1 20 3.8876   471
  2  2  1  2 -1  1  0  4  1  1  9 3.8876   471
  3  2  1  9 -1  0 -1  1  1  1  2 3.8876   471
  4  2  1  9  1 -1  0  2  1  1  2 3.8876   471
  1  2  1  2  1  0  1  3  2  1  9 3.8876   472
  3  2  1  9 -1  0 -1  1  2  1  2 3.8876   472
  1  1  1  9  1  0  1  3  1  1  2 3.8876   469
  3  1  1  2 -1  0 -1  1  1  1  9 3.8876   469
  3  1  1  2 -1  0 -1  1  2  1  9 3.8876   470
  4  1  1 20  1 -1  0  2  2  1 21 3.8876   470
  1  2  1  9  1  0  1  3  1  1  2 3.8876   471
  2  2  1 21 -1  1  0  4  1  1 20 3.8876   471
  4  1  1 21  1 -1  0  2  2  1 20 3.8877   470
  2  2  1 20 -1  1  0  4  1  1 21 3.8877   471
  1  1  1 21  1  0  1  3  2  1 20 3.8877   470
  2  1  1 21 -1  1  0  4  2  1 20 3.8877   470
  3  1  1 21 -1  0 -1  1  2  1 20 3.8877   470
  1  2  1 20  1  0  1  3  1  1 21 3.8877   471
  3  2  1 20 -1  0 -1  1  1  1 21 3.8877   471
  4  2  1 20  1 -1  0  2  1  1 21 3.8877   471
  1  1  1 20  0  0  1  4  1  1 12 3.8937   473
  2  1  1 20  0  0  0  3  1  1 12 3.8937   473
  3  1  1 12  0  0  0  2  1  1 20 3.8937   473
  4  1  1 12  0  0 -1  1  1  1 20 3.8937   473
  2  1  1 20  0  0  0  3  2  1 12 3.8937   474
  3  2  1 12  0  0  0  2  1  1 20 3.8937   475
  1  1  1 20  0  0  1  4  2  1 12 3.8938   474
  4  2  1 12  0  0 -1  1  1  1 20 3.8938   475
  1  1  1 12  0  0  0  4  1  1 20 3.8938   473
  2  1  1 12  0  0  1  3  1  1 20 3.8938   473
  3  1  1 20  0  0 -1  2  1  1 12 3.8938   473
  4  1  1 20  0  0  0  1  1  1 12 3.8938   473
  3  1  1 20  0  0 -1  2  2  1 12 3.8938   474
  4  1  1 20  0  0  0  1  2  1 12 3.8938   474
  1  2  1 12  0  0  0  4  1  1 20 3.8938   475
  2  2  1 12  0  0  1  3  1  1 20 3.8938   475
  1  1  1 14  1  0  0  2  1  1  3 3.8995   477
  2  1  1  3 -1  0  0  1  1  1 14 3.8995   477
  2  1  1  3 -1  0  0  1  2  1 14 3.8995   478
  1  2  1 14  1  0  0  2  1  1  3 3.8995   479
  1  1  1  3  1 -1  0  2  1  1 14 3.8995   477
  2  1  1 14 -1  1  0  1  1  1  3 3.8995   477
  3  1  1  3 -1  1  0  4  1  1 14 3.8995   477
  3  1  1 14 -1  0  0  4  1  1  3 3.8995   477
  4  1  1  3  1  0  0  3  1  1 14 3.8995   477
  4  1  1 14  1 -1  0  3  1  1  3 3.8995   477
  1  1  1  3  1 -1  0  2  2  1 14 3.8995   478
  1  1  1 14  1  0  0  2  2  1  3 3.8995   478
  2  1  1 14 -1  1  0  1  2  1  3 3.8995   478
  3  1  1  3 -1  1  0  4  2  1 14 3.8995   478
  3  1  1 14 -1  0  0  4  2  1  3 3.8995   478
  1  2  1  3  1 -1  0  2  1  1 14 3.8995   479
  2  2  1  3 -1  0  0  1  1  1 14 3.8995   479
  2  2  1 14 -1  1  0  1  1  1  3 3.8995   479
  4  2  1  3  1  0  0  3  1  1 14 3.8995   479
  4  2  1 14  1 -1  0  3  1  1  3 3.8995   479
  1  2  1  3  1 -1  0  2  2  1 14 3.8995   480
  1  2  1 14  1  0  0  2  2  1  3 3.8995   480
  2  2  1  3 -1  0  0  1  2  1 14 3.8995   480
  2  2  1 14 -1  1  0  1  2  1  3 3.8995   480
  3  2  1  3 -1  1  0  4  2  1 14 3.8995   480
  3  2  1 14 -1  0  0  4  2  1  3 3.8995   480
  4  2  1  3  1  0  0  3  2  1 14 3.8995   480
  4  1  1  3  1  0  0  3  2  1 14 3.8995   478
  4  1  1 14  1 -1  0  3  2  1  3 3.8995   478
  3  2  1  3 -1  1  0  4  1  1 14 3.8995   479
  3  2  1 14 -1  0  0  4  1  1  3 3.8995   479
  4  2  1 14  1 -1  0  3  2  1  3 3.8995   480
  2  1  1 20 -1  1  0  4  1  1 21 3.9005   477
  4  1  1 21  1 -1  0  2  1  1 20 3.9005   477
  1  1  1 20  1  0  1  3  1  1 21 3.9006   477
  1  1  1 21  1  0  1  3  1  1 20 3.9006   477
  3  1  1 20 -1  0 -1  1  1  1 21 3.9006   477
  3  1  1 21 -1  0 -1  1  1  1 20 3.9006   477
  2  1  1 21 -1  1  0  4  1  1 20 3.9006   477
  4  1  1 20  1 -1  0  2  1  1 21 3.9006   477
  1  1  1 13  1  0  0  2  1  1  4 3.9172   489
  2  1  1  4 -1  0  0  1  1  1 13 3.9172   489
  3  1  1  4 -1  1  0  4  1  1 13 3.9172   489
  4  1  1 13  1 -1  0  3  1  1  4 3.9172   489
  2  1  1  4 -1  0  0  1  2  1 13 3.9172   490
  3  1  1  4 -1  1  0  4  2  1 13 3.9172   490
  1  2  1 13  1  0  0  2  1  1  4 3.9172   491
  4  2  1 13  1 -1  0  3  1  1  4 3.9172   491
  1  1  1  4  1 -1  0  2  1  1 13 3.9172   489
  2  1  1 13 -1  1  0  1  1  1  4 3.9172   489
  1  1  1  4  1 -1  0  2  2  1 13 3.9172   490
  1  1  1 13  1  0  0  2  2  1  4 3.9172   490
  2  1  1 13 -1  1  0  1  2  1  4 3.9172   490
  3  1  1 13 -1  0  0  4  2  1  4 3.9172   490
  4  1  1 13  1 -1  0  3  2  1  4 3.9172   490
  1  2  1  4  1 -1  0  2  1  1 13 3.9172   491
  2  2  1  4 -1  0  0  1  1  1 13 3.9172   491
  2  2  1 13 -1  1  0  1  1  1  4 3.9172   491
  3  2  1  4 -1  1  0  4  1  1 13 3.9172   491
  4  2  1  4  1  0  0  3  1  1 13 3.9172   491
  1  2  1  4  1 -1  0  2  2  1 13 3.9172   492
  1  2  1 13  1  0  0  2  2  1  4 3.9172   492
  2  2  1  4 -1  0  0  1  2  1 13 3.9172   492
  2  2  1 13 -1  1  0  1  2  1  4 3.9172   492
  3  2  1  4 -1  1  0  4  2  1 13 3.9172   492
  3  2  1 13 -1  0  0  4  2  1  4 3.9172   492
  4  2  1  4  1  0  0  3  2  1 13 3.9172   492
  4  2  1 13  1 -1  0  3  2  1  4 3.9172   492
  3  1  1 13 -1  0  0  4  1  1  4 3.9172   489
  4  1  1  4  1  0  0  3  1  1 13 3.9172   489
  4  1  1  4  1  0  0  3  2  1 13 3.9172   490
  3  2  1 13 -1  0  0  4  1  1  4 3.9172   491
  3  1  1 21 -1  0  0  4  1  1  9 3.9384   497
  4  1  1  9  1  0  0  3  1  1 21 3.9384   497
  1  1  1  9  1 -1  0  2  1  1 21 3.9384   497
  1  1  1 21  1  0  0  2  1  1  9 3.9384   497
  2  1  1  9 -1  0  0  1  1  1 21 3.9384   497
  2  1  1 21 -1  1  0  1  1  1  9 3.9384   497
  3  1  1  9 -1  1  0  4  1  1 21 3.9384   497
  4  1  1 21  1 -1  0  3  1  1  9 3.9384   497
  2  1  1 21 -1  1  0  1  2  1  9 3.9384   498
  3  1  1 21 -1  0  0  4  2  1  9 3.9384   498
  1  2  1  9  1 -1  0  2  1  1 21 3.9384   499
  4  2  1  9  1  0  0  3  1  1 21 3.9384   499
  1  1  1 21  1  0  0  2  2  1  9 3.9384   498
  4  1  1 21  1 -1  0  3  2  1  9 3.9384   498
  2  2  1  9 -1  0  0  1  1  1 21 3.9384   499
  3  2  1  9 -1  1  0  4  1  1 21 3.9384   499
  2  1  1 11  1  0  0  2  1  1 21 3.9686   513
  2  1  1 21 -1  0  0  2  1  1 11 3.9686   513
  2  1  1 21 -1  0  0  2  2  1 11 3.9686   514
  2  2  1 11  1  0  0  2  1  1 21 3.9686   515
  1  1  1 11 -1  0  0  1  1  1 21 3.9686   513
  1  1  1 21  1  0  0  1  1  1 11 3.9686   513
  3  1  1 11  1  0  0  3  1  1 21 3.9686   513
  3  1  1 21 -1  0  0  3  1  1 11 3.9686   513
  1  1  1 21  1  0  0  1  2  1 11 3.9686   514
  4  1  1 21  1  0  0  4  2  1 11 3.9686   514
  1  2  1 11 -1  0  0  1  1  1 21 3.9686   515
  4  2  1 11 -1  0  0  4  1  1 21 3.9686   515
  3  1  1 21 -1  0  0  3  2  1 11 3.9687   514
  3  2  1 11  1  0  0  3  1  1 21 3.9687   515
  4  1  1 11 -1  0  0  4  1  1 21 3.9687   513
  4  1  1 21  1  0  0  4  1  1 11 3.9687   513
  3  1  1 21 -1  0  0  4  1  1 20 3.9717   513
  4  1  1 20  1  0  0  3  1  1 21 3.9717   513
  1  1  1 20  1 -1  0  2  1  1 21 3.9717   513
  2  1  1 21 -1  1  0  1  1  1 20 3.9717   513
  1  1  1 21  1  0  0  2  1  1 20 3.9717   513
  2  1  1 20 -1  0  0  1  1  1 21 3.9717   513
  3  1  1 20 -1  1  0  4  1  1 21 3.9717   513
  4  1  1 21  1 -1  0  3  1  1 20 3.9717   513
  1  1  1  6  1 -1  1  3  2  1 20 3.9740   518
  3  2  1 20 -1  1 -1  1  1  1  6 3.9740   519
  1  2  1  6  1 -1  1  3  2  1 20 3.9740   520
  3  2  1 20 -1  1 -1  1  2  1  6 3.9740   520
  3  1  1  6 -1  1 -1  1  2  1 20 3.9740   518
  1  2  1 20  1 -1  1  3  1  1  6 3.9740   519
  1  2  1 20  1 -1  1  3  2  1  6 3.9740   520
  3  2  1  6 -1  1 -1  1  2  1 20 3.9740   520
  2  1  1  6 -1  0  0  4  2  1 20 3.9740   518
  4  2  1 20  1  0  0  2  1  1  6 3.9740   519
  4  1  1  6  1  0  0  2  2  1 20 3.9740   518
  2  2  1 20 -1  0  0  4  1  1  6 3.9740   519
  2  2  1  6 -1  0  0  4  2  1 20 3.9740   520
  2  2  1 20 -1  0  0  4  2  1  6 3.9740   520
  4  2  1  6  1  0  0  2  2  1 20 3.9740   520
  4  2  1 20  1  0  0  2  2  1  6 3.9740   520
  2  1  1  4 -1  0  0  2  2  1 20 3.9746   518
  2  2  1 20  1  0  0  2  1  1  4 3.9746   519
  1  1  1  4  1  0  0  1  2  1 20 3.9746   518
  4  1  1  4  1  0  0  4  2  1 20 3.9746   518
  4  2  1 20 -1  0  0  4  1  1  4 3.9746   519
  2  2  1  4 -1  0  0  2  2  1 20 3.9746   520
  2  2  1 20  1  0  0  2  2  1  4 3.9746   520
  4  2  1  4  1  0  0  4  2  1 20 3.9746   520
  4  2  1 20 -1  0  0  4  2  1  4 3.9746   520
  3  1  1  4 -1  0  0  3  2  1 20 3.9746   518
  1  2  1 20 -1  0  0  1  1  1  4 3.9746   519
  3  2  1 20  1  0  0  3  1  1  4 3.9746   519
  1  2  1  4  1  0  0  1  2  1 20 3.9746   520
  1  2  1 20 -1  0  0  1  2  1  4 3.9746   520
  3  2  1  4 -1  0  0  3  2  1 20 3.9746   520
  3  2  1 20  1  0  0  3  2  1  4 3.9746   520
  1  1  1  6  1 -1  1  3  1  1 20 3.9830   521
  2  1  1  6 -1  0  0  4  1  1 20 3.9830   521
  3  1  1  6 -1  1 -1  1  1  1 20 3.9830   521
  3  1  1 20 -1  1 -1  1  1  1  6 3.9830   521
  4  1  1 20  1  0  0  2  1  1  6 3.9830   521
  1  1  1 20  1 -1  1  3  2  1  6 3.9830   522
  1  2  1  6  1 -1  1  3  1  1 20 3.9830   523
  3  2  1  6 -1  1 -1  1  1  1 20 3.9830   523
  1  1  1 20  1 -1  1  3  1  1  6 3.9831   521
  3  1  1 20 -1  1 -1  1  2  1  6 3.9831   522
  4  1  1 20  1  0  0  2  2  1  6 3.9831   522
  2  2  1  6 -1  0  0  4  1  1 20 3.9831   523
  2  1  1 20 -1  0  0  4  1  1  6 3.9831   521
  4  1  1  6  1  0  0  2  1  1 20 3.9831   521
  2  1  1 20 -1  0  0  4  2  1  6 3.9831   522
  4  2  1  6  1  0  0  2  1  1 20 3.9831   523
  1  1  1  9  1 -1  0  2  2  1 21 3.9925   526
  2  1  1  9 -1  0  0  1  2  1 21 3.9925   526
  3  1  1  9 -1  1  0  4  2  1 21 3.9925   526
  4  1  1  9  1  0  0  3  2  1 21 3.9925   526
  1  2  1 21  1  0  0  2  1  1  9 3.9925   527
  2  2  1 21 -1  1  0  1  1  1  9 3.9925   527
  3  2  1 21 -1  0  0  4  1  1  9 3.9925   527
  4  2  1 21  1 -1  0  3  1  1  9 3.9925   527
  1  2  1  9  1 -1  0  2  2  1 21 3.9925   528
  2  2  1 21 -1  1  0  1  2  1  9 3.9925   528
  1  2  1 21  1  0  0  2  2  1  9 3.9925   528
  2  2  1  9 -1  0  0  1  2  1 21 3.9925   528
  3  2  1  9 -1  1  0  4  2  1 21 3.9925   528
  3  2  1 21 -1  0  0  4  2  1  9 3.9925   528
  4  2  1  9  1  0  0  3  2  1 21 3.9925   528
  4  2  1 21  1 -1  0  3  2  1  9 3.9925   528
  3  1  1  7 -1  1  0  4  1  1 13 3.9929   525
  4  1  1 13  1 -1  0  3  1  1  7 3.9929   525
  3  1  1  7 -1  1  0  4  2  1 13 3.9929   526
  4  1  1 13  1 -1  0  3  2  1  7 3.9929   526
  3  2  1  7 -1  1  0  4  1  1 13 3.9929   527
  4  2  1 13  1 -1  0  3  1  1  7 3.9929   527
  1  1  1  7  1 -1  0  2  1  1 13 3.9929   525
  1  1  1 13  1  0  0  2  1  1  7 3.9929   525
  2  1  1  7 -1  0  0  1  1  1 13 3.9929   525
  2  1  1 13 -1  1  0  1  1  1  7 3.9929   525
  3  1  1 13 -1  0  0  4  1  1  7 3.9929   525
  4  1  1  7  1  0  0  3  1  1 13 3.9929   525
  1  1  1  7  1 -1  0  2  2  1 13 3.9929   526
  2  1  1  7 -1  0  0  1  2  1 13 3.9929   526
  2  1  1 13 -1  1  0  1  2  1  7 3.9929   526
  1  2  1  7  1 -1  0  2  1  1 13 3.9929   527
  1  2  1 13  1  0  0  2  1  1  7 3.9929   527
  2  2  1 13 -1  1  0  1  1  1  7 3.9929   527
  1  2  1  7  1 -1  0  2  2  1 13 3.9929   528
  2  2  1 13 -1  1  0  1  2  1  7 3.9929   528
  3  2  1  7 -1  1  0  4  2  1 13 3.9929   528
  4  2  1 13  1 -1  0  3  2  1  7 3.9929   528
  1  1  1 13  1  0  0  2  2  1  7 3.9929   526
  3  1  1 13 -1  0  0  4  2  1  7 3.9929   526
  4  1  1  7  1  0  0  3  2  1 13 3.9929   526
  2  2  1  7 -1  0  0  1  1  1 13 3.9929   527
  3  2  1 13 -1  0  0  4  1  1  7 3.9929   527
  4  2  1  7  1  0  0  3  1  1 13 3.9929   527
  1  2  1 13  1  0  0  2  2  1  7 3.9929   528
  2  2  1  7 -1  0  0  1  2  1 13 3.9929   528
  3  2  1 13 -1  0  0  4  2  1  7 3.9929   528
  4  2  1  7  1  0  0  3  2  1 13 3.9929   528
  2  1  1  6 -1  0  0  3  1  1 12 4.0048   529
  3  1  1 12  1  0  0  2  1  1  6 4.0048   529
  3  1  1 12  1  0  0  2  2  1  6 4.0048   530
  2  2  1  6 -1  0  0  3  1  1 12 4.0048   531
  1  1  1  6  1  0  1  4  1  1 12 4.0048   529
  1  1  1 12 -1  0  0  4  1  1  6 4.0048   529
  4  1  1  6  1  0  0  1  1  1 12 4.0048   529
  4  1  1 12 -1  0 -1  1  1  1  6 4.0048   529
  1  1  1  6  1  0  1  4  2  1 12 4.0048   530
  2  1  1  6 -1  0  0  3  2  1 12 4.0048   530
  2  1  1 12  1  0  1  3  2  1  6 4.0048   530
  3  1  1  6 -1  0 -1  2  2  1 12 4.0048   530
  4  1  1  6  1  0  0  1  2  1 12 4.0048   530
  4  1  1 12 -1  0 -1  1  2  1  6 4.0048   530
  1  2  1  6  1  0  1  4  1  1 12 4.0048   531
  1  2  1 12 -1  0  0  4  1  1  6 4.0048   531
  2  2  1 12  1  0  1  3  1  1  6 4.0048   531
  3  2  1  6 -1  0 -1  2  1  1 12 4.0048   531
  3  2  1 12  1  0  0  2  1  1  6 4.0048   531
  4  2  1 12 -1  0 -1  1  1  1  6 4.0048   531
  1  2  1  6  1  0  1  4  2  1 12 4.0048   532
  2  2  1  6 -1  0  0  3  2  1 12 4.0048   532
  2  2  1 12  1  0  1  3  2  1  6 4.0048   532
  3  2  1  6 -1  0 -1  2  2  1 12 4.0048   532
  3  2  1 12  1  0  0  2  2  1  6 4.0048   532
  4  2  1 12 -1  0 -1  1  2  1  6 4.0048   532
  2  1  1 12  1  0  1  3  1  1  6 4.0048   529
  3  1  1  6 -1  0 -1  2  1  1 12 4.0048   529
  1  1  1 12 -1  0  0  4  2  1  6 4.0048   530
  4  2  1  6  1  0  0  1  1  1 12 4.0048   531
  1  2  1 12 -1  0  0  4  2  1  6 4.0048   532
  4  2  1  6  1  0  0  1  2  1 12 4.0048   532
  1  1  1  7  0  0  1  4  1  1 13 4.0109   533
  4  1  1 13  0  0 -1  1  1  1  7 4.0109   533
  1  1  1 13  0  0  0  4  2  1  7 4.0109   534
  4  1  1 13  0  0 -1  1  2  1  7 4.0109   534
  1  2  1  7  0  0  1  4  1  1 13 4.0109   535
  4  2  1  7  0  0  0  1  1  1 13 4.0109   535
  1  2  1 13  0  0  0  4  2  1  7 4.0109   536
  4  2  1  7  0  0  0  1  2  1 13 4.0109   536
  1  1  1 13  0  0  0  4  1  1  7 4.0109   533
  2  1  1  7  0  0  0  3  1  1 13 4.0109   533
  2  1  1 13  0  0  1  3  1  1  7 4.0109   533
  3  1  1 13  0  0  0  2  1  1  7 4.0109   533
  4  1  1  7  0  0  0  1  1  1 13 4.0109   533
  1  1  1  7  0  0  1  4  2  1 13 4.0109   534
  2  1  1  7  0  0  0  3  2  1 13 4.0109   534
  2  1  1 13  0  0  1  3  2  1  7 4.0109   534
  3  1  1 13  0  0  0  2  2  1  7 4.0109   534
  4  1  1  7  0  0  0  1  2  1 13 4.0109   534
  1  2  1 13  0  0  0  4  1  1  7 4.0109   535
  2  2  1  7  0  0  0  3  1  1 13 4.0109   535
  3  2  1  7  0  0 -1  2  1  1 13 4.0109   535
  3  2  1 13  0  0  0  2  1  1  7 4.0109   535
  4  2  1 13  0  0 -1  1  1  1  7 4.0109   535
  1  2  1  7  0  0  1  4  2  1 13 4.0109   536
  2  2  1  7  0  0  0  3  2  1 13 4.0109   536
  2  2  1 13  0  0  1  3  2  1  7 4.0109   536
  3  2  1  7  0  0 -1  2  2  1 13 4.0109   536
  3  2  1 13  0  0  0  2  2  1  7 4.0109   536
  4  2  1 13  0  0 -1  1  2  1  7 4.0109   536
  3  1  1  7  0  0 -1  2  1  1 13 4.0109   533
  3  1  1  7  0  0 -1  2  2  1 13 4.0109   534
  2  2  1 13  0  0  1  3  1  1  7 4.0109   535
  4  2  1 11 -1  0  0  4  2  1 21 4.0121   536
  4  2  1 21  1  0  0  4  2  1 11 4.0121   536
  1  1  1 11 -1  0  0  1  2  1 21 4.0121   534
  2  1  1 11  1  0  0  2  2  1 21 4.0121   534
  1  2  1 21  1  0  0  1  1  1 11 4.0121   535
  2  2  1 21 -1  0  0  2  1  1 11 4.0121   535
  1  2  1 11 -1  0  0  1  2  1 21 4.0121   536
  1  2  1 21  1  0  0  1  2  1 11 4.0121   536
  2  2  1 11  1  0  0  2  2  1 21 4.0121   536
  2  2  1 21 -1  0  0  2  2  1 11 4.0121   536
  3  1  1 11  1  0  0  3  2  1 21 4.0121   534
  4  1  1 11 -1  0  0  4  2  1 21 4.0121   534
  3  2  1 21 -1  0  0  3  1  1 11 4.0121   535
  4  2  1 21  1  0  0  4  1  1 11 4.0121   535
  3  2  1 11  1  0  0  3  2  1 21 4.0121   536
  3  2  1 21 -1  0  0  3  2  1 11 4.0121   536
  1  1  1 14  0  0  0  4  2  1  6 4.0171   538
  4  2  1  6  0  0  0  1  1  1 14 4.0171   539
  1  2  1 14  0  0  0  4  2  1  6 4.0171   540
  4  2  1  6  0  0  0  1  2  1 14 4.0171   540
  1  1  1  6  0  0  1  4  1  1 14 4.0171   537
  1  1  1 14  0  0  0  4  1  1  6 4.0171   537
  2  1  1  6  0  0  0  3  1  1 14 4.0171   537
  3  1  1 14  0  0  0  2  1  1  6 4.0171   537
  4  1  1  6  0  0  0  1  1  1 14 4.0171   537
  4  1  1 14  0  0 -1  1  1  1  6 4.0171   537
  2  1  1 14  0  0  1  3  2  1  6 4.0171   538
  3  1  1 14  0  0  0  2  2  1  6 4.0171   538
  4  1  1  6  0  0  0  1  2  1 14 4.0171   538
  4  1  1 14  0  0 -1  1  2  1  6 4.0171   538
  1  2  1  6  0  0  1  4  1  1 14 4.0171   539
  1  2  1 14  0  0  0  4  1  1  6 4.0171   539
  2  2  1  6  0  0  0  3  1  1 14 4.0171   539
  3  2  1  6  0  0 -1  2  1  1 14 4.0171   539
  2  2  1 14  0  0  1  3  2  1  6 4.0171   540
  3  2  1  6  0  0 -1  2  2  1 14 4.0171   540
  2  1  1 14  0  0  1  3  1  1  6 4.0172   537
  3  1  1  6  0  0 -1  2  1  1 14 4.0172   537
  1  1  1  6  0  0  1  4  2  1 14 4.0172   538
  2  1  1  6  0  0  0  3  2  1 14 4.0172   538
  3  1  1  6  0  0 -1  2  2  1 14 4.0172   538
  2  2  1 14  0  0  1  3  1  1  6 4.0172   539
  3  2  1 14  0  0  0  2  1  1  6 4.0172   539
  4  2  1 14  0  0 -1  1  1  1  6 4.0172   539
  1  2  1  6  0  0  1  4  2  1 14 4.0172   540
  2  2  1  6  0  0  0  3  2  1 14 4.0172   540
  3  2  1 14  0  0  0  2  2  1  6 4.0172   540
  4  2  1 14  0  0 -1  1  2  1  6 4.0172   540
  2  1  1  4 -1  0  0  2  1  1 20 4.0174   537
  2  1  1 20  1  0  0  2  1  1  4 4.0174   537
  1  1  1  4  1  0  0  1  1  1 20 4.0174   537
  1  1  1 20 -1  0  0  1  1  1  4 4.0174   537
  3  1  1  4 -1  0  0  3  1  1 20 4.0174   537
  3  1  1 20  1  0  0  3  1  1  4 4.0174   537
  1  1  1 20 -1  0  0  1  2  1  4 4.0174   538
  2  1  1 20  1  0  0  2  2  1  4 4.0174   538
  3  1  1 20  1  0  0  3  2  1  4 4.0174   538
  1  2  1  4  1  0  0  1  1  1 20 4.0174   539
  2  2  1  4 -1  0  0  2  1  1 20 4.0174   539
  4  1  1  4  1  0  0  4  1  1 20 4.0174   537
  4  1  1 20 -1  0  0  4  1  1  4 4.0174   537
  4  1  1 20 -1  0  0  4  2  1  4 4.0174   538
  3  2  1  4 -1  0  0  3  1  1 20 4.0174   539
  4  2  1  4  1  0  0  4  1  1 20 4.0174   539
  1  1  1 15  0  0  0  4  2  1  7 4.0177   538
  3  1  1 15  0  0  0  2  2  1  7 4.0177   538
  2  2  1  7  0  0  0  3  1  1 15 4.0177   539
  4  2  1  7  0  0  0  1  1  1 15 4.0177   539
  1  2  1 15  0  0  0  4  2  1  7 4.0177   540
  4  2  1  7  0  0  0  1  2  1 15 4.0177   540
  1  1  1 15  0  0  0  4  1  1  7 4.0177   537
  2  1  1  7  0  0  0  3  1  1 15 4.0177   537
  3  1  1 15  0  0  0  2  1  1  7 4.0177   537
  4  1  1  7  0  0  0  1  1  1 15 4.0177   537
  2  1  1 15  0  0  1  3  2  1  7 4.0177   538
  4  1  1  7  0  0  0  1  2  1 15 4.0177   538
  1  2  1 15  0  0  0  4  1  1  7 4.0177   539
  3  2  1  7  0  0 -1  2  1  1 15 4.0177   539
  2  2  1  7  0  0  0  3  2  1 15 4.0177   540
  3  2  1 15  0  0  0  2  2  1  7 4.0177   540
  1  1  1  7  0  0  1  4  1  1 15 4.0177   537
  2  1  1 15  0  0  1  3  1  1  7 4.0177   537
  3  1  1  7  0  0 -1  2  1  1 15 4.0177   537
  4  1  1 15  0  0 -1  1  1  1  7 4.0177   537
  1  1  1  7  0  0  1  4  2  1 15 4.0177   538
  2  1  1  7  0  0  0  3  2  1 15 4.0177   538
  3  1  1  7  0  0 -1  2  2  1 15 4.0177   538
  4  1  1 15  0  0 -1  1  2  1  7 4.0177   538
  1  2  1  7  0  0  1  4  1  1 15 4.0177   539
  2  2  1 15  0  0  1  3  1  1  7 4.0177   539
  3  2  1 15  0  0  0  2  1  1  7 4.0177   539
  4  2  1 15  0  0 -1  1  1  1  7 4.0177   539
  1  2  1  7  0  0  1  4  2  1 15 4.0177   540
  2  2  1 15  0  0  1  3  2  1  7 4.0177   540
  3  2  1  7  0  0 -1  2  2  1 15 4.0177   540
  4  2  1 15  0  0 -1  1  2  1  7 4.0177   540
  2  1  1 21 -1  1  0  1  2  1 20 4.0209   538
  3  1  1 21 -1  0  0  4  2  1 20 4.0209   538
  1  2  1 20  1 -1  0  2  1  1 21 4.0209   539
  4  2  1 20  1  0  0  3  1  1 21 4.0209   539
  4  1  1 21  1 -1  0  3  2  1 20 4.0209   538
  3  2  1 20 -1  1  0  4  1  1 21 4.0209   539
  1  1  1 21  1  0  0  2  2  1 20 4.0209   538
  2  2  1 20 -1  0  0  1  1  1 21 4.0209   539
  1  1  1 15  0  0  0  4  2  1  6 4.0329   546
  4  2  1  6  0  0  0  1  1  1 15 4.0329   547
  1  2  1 15  0  0  0  4  2  1  6 4.0329   548
  4  2  1  6  0  0  0  1  2  1 15 4.0329   548
  1  1  1 15  0  0  0  4  1  1  6 4.0329   545
  4  1  1  6  0  0  0  1  1  1 15 4.0329   545
  2  1  1 15  0  0  1  3  2  1  6 4.0329   546
  3  1  1 15  0  0  0  2  2  1  6 4.0329   546
  4  1  1  6  0  0  0  1  2  1 15 4.0329   546
  1  2  1 15  0  0  0  4  1  1  6 4.0329   547
  2  2  1  6  0  0  0  3  1  1 15 4.0329   547
  3  2  1  6  0  0 -1  2  1  1 15 4.0329   547
  1  1  1  6  0  0  1  4  1  1 15 4.0329   545
  2  1  1  6  0  0  0  3  1  1 15 4.0329   545
  2  1  1 15  0  0  1  3  1  1  6 4.0329   545
  3  1  1  6  0  0 -1  2  1  1 15 4.0329   545
  3  1  1 15  0  0  0  2  1  1  6 4.0329   545
  4  1  1 15  0  0 -1  1  1  1  6 4.0329   545
  4  1  1 15  0  0 -1  1  2  1  6 4.0329   546
  1  2  1  6  0  0  1  4  1  1 15 4.0329   547
  2  2  1  6  0  0  0  3  2  1 15 4.0329   548
  2  2  1 15  0  0  1  3  2  1  6 4.0329   548
  3  2  1  6  0  0 -1  2  2  1 15 4.0329   548
  3  2  1 15  0  0  0  2  2  1  6 4.0329   548
  1  1  1  6  0  0  1  4  2  1 15 4.0329   546
  2  1  1  6  0  0  0  3  2  1 15 4.0329   546
  3  1  1  6  0  0 -1  2  2  1 15 4.0329   546
  2  2  1 15  0  0  1  3  1  1  6 4.0329   547
  3  2  1 15  0  0  0  2  1  1  6 4.0329   547
  4  2  1 15  0  0 -1  1  1  1  6 4.0329   547
  1  2  1  6  0  0  1  4  2  1 15 4.0329   548
  4  2  1 15  0  0 -1  1  2  1  6 4.0329   548
  1  1  1  2  0  0  0  4  1  1  6 4.0359   545
  4  1  1  6  0  0  0  1  1  1  2 4.0359   545
  1  1  1  2  0  0  0  4  2  1  6 4.0359   546
  2  1  1  2  0  0  1  3  2  1  6 4.0359   546
  3  1  1  2  0  0  0  2  2  1  6 4.0359   546
  4  1  1  6  0  0  0  1  2  1  2 4.0359   546
  1  2  1  2  0  0  0  4  1  1  6 4.0359   547
  2  2  1  6  0  0  0  3  1  1  2 4.0359   547
  3  2  1  6  0  0 -1  2  1  1  2 4.0359   547
  4  2  1  6  0  0  0  1  1  1  2 4.0359   547
  1  2  1  2  0  0  0  4  2  1  6 4.0359   548
  4  2  1  6  0  0  0  1  2  1  2 4.0359   548
  2  1  1  6  0  0  0  3  1  1  2 4.0359   545
  3  1  1  2  0  0  0  2  1  1  6 4.0359   545
  2  2  1  2  0  0  1  3  2  1  6 4.0359   548
  3  2  1  6  0  0 -1  2  2  1  2 4.0359   548
  2  1  1  2  0  0  1  3  1  1  6 4.0359   545
  3  1  1  6  0  0 -1  2  1  1  2 4.0359   545
  2  1  1  6  0  0  0  3  2  1  2 4.0359   546
  3  1  1  6  0  0 -1  2  2  1  2 4.0359   546
  2  2  1  2  0  0  1  3  1  1  6 4.0359   547
  3  2  1  2  0  0  0  2  1  1  6 4.0359   547
  2  2  1  6  0  0  0  3  2  1  2 4.0359   548
  3  2  1  2  0  0  0  2  2  1  6 4.0359   548
  1  1  1  6  0  0  1  4  1  1  2 4.0359   545
  4  1  1  2  0  0 -1  1  1  1  6 4.0359   545
  1  1  1  6  0  0  1  4  2  1  2 4.0359   546
  4  1  1  2  0  0 -1  1  2  1  6 4.0359   546
  1  2  1  6  0  0  1  4  1  1  2 4.0359   547
  4  2  1  2  0  0 -1  1  1  1  6 4.0359   547
  1  2  1  6  0  0  1  4  2  1  2 4.0359   548
  4  2  1  2  0  0 -1  1  2  1  6 4.0359   548
  2  1  1  6  0  0  0  3  1  1 21 4.0390   549
  3  1  1 21  0  0  0  2  1  1  6 4.0390   549
  2  1  1 21  0  0  1  3  2  1  6 4.0390   550
  3  1  1 21  0  0  0  2  2  1  6 4.0390   550
  2  2  1  6  0  0  0  3  1  1 21 4.0390   551
  3  2  1  6  0  0 -1  2  1  1 21 4.0390   551
  1  1  1 21  0  0  0  4  1  1  6 4.0390   549
  2  1  1 21  0  0  1  3  1  1  6 4.0390   549
  3  1  1  6  0  0 -1  2  1  1 21 4.0390   549
  4  1  1  6  0  0  0  1  1  1 21 4.0390   549
  1  1  1 21  0  0  0  4  2  1  6 4.0390   550
  4  2  1  6  0  0  0  1  1  1 21 4.0390   551
  1  1  1  6  0  0  1  4  1  1 21 4.0390   549
  4  1  1 21  0  0 -1  1  1  1  6 4.0390   549
  4  1  1 21  0  0 -1  1  2  1  6 4.0390   550
  1  2  1  6  0  0  1  4  1  1 21 4.0390   551
  1  1  1 20  1 -1  0  2  2  1 21 4.0397   550
  2  2  1 21 -1  1  0  1  1  1 20 4.0397   551
  2  1  1 20 -1  0  0  1  2  1 21 4.0397   550
  3  1  1 20 -1  1  0  4  2  1 21 4.0397   550
  4  1  1 20  1  0  0  3  2  1 21 4.0397   550
  1  2  1 21  1  0  0  2  1  1 20 4.0397   551
  3  2  1 21 -1  0  0  4  1  1 20 4.0397   551
  4  2  1 21  1 -1  0  3  1  1 20 4.0397   551
  3  1  1 13  0  0  0  4  2  1 20 4.0410   550
  4  2  1 20  0  0  0  3  1  1 13 4.0410   551
  3  2  1 13  0  0  0  4  2  1 20 4.0411   552
  3  2  1 20  0  1  0  4  2  1 13 4.0411   552
  4  2  1 13  0 -1  0  3  2  1 20 4.0411   552
  4  2  1 20  0  0  0  3  2  1 13 4.0411   552
  1  1  1 13  0  0  0  2  2  1 20 4.0411   550
  2  1  1 13  0  1  0  1  2  1 20 4.0411   550
  4  1  1 13  0 -1  0  3  2  1 20 4.0411   550
  1  2  1 20  0 -1  0  2  1  1 13 4.0411   551
  2  2  1 20  0  0  0  1  1  1 13 4.0411   551
  3  2  1 20  0  1  0  4  1  1 13 4.0411   551
  1  2  1 13  0  0  0  2  2  1 20 4.0411   552
  1  2  1 20  0 -1  0  2  2  1 13 4.0411   552
  2  2  1 13  0  1  0  1  2  1 20 4.0411   552
  2  2  1 20  0  0  0  1  2  1 13 4.0411   552
  4  1  1  6  0  0  0  1  2  1 21 4.0528   558
  1  2  1 21  0  0  0  4  1  1  6 4.0528   559
  1  2  1 21  0  0  0  4  2  1  6 4.0528   560
  2  2  1 21  0  0  1  3  2  1  6 4.0528   560
  3  2  1  6  0  0 -1  2  2  1 21 4.0528   560
  4  2  1  6  0  0  0  1  2  1 21 4.0528   560
  1  1  1  6  0  0  1  4  2  1 21 4.0528   558
  3  1  1  6  0  0 -1  2  2  1 21 4.0528   558
  2  2  1 21  0  0  1  3  1  1  6 4.0528   559
  4  2  1 21  0  0 -1  1  1  1  6 4.0528   559
  1  2  1  6  0  0  1  4  2  1 21 4.0528   560
  4  2  1 21  0  0 -1  1  2  1  6 4.0528   560
  2  1  1  6  0  0  0  3  2  1 21 4.0528   558
  3  2  1 21  0  0  0  2  1  1  6 4.0528   559
  2  2  1  6  0  0  0  3  2  1 21 4.0528   560
  3  2  1 21  0  0  0  2  2  1  6 4.0528   560
  2  1  1  5 -2  1  0  4  1  1 21 4.0529   557
  4  1  1 21  2 -1  0  2  1  1  5 4.0529   557
  4  1  1 21  2 -1  0  2  2  1  5 4.0529   558
  2  2  1  5 -2  1  0  4  1  1 21 4.0529   559
  2  1  1 21 -2  1  0  4  1  1  5 4.0529   557
  4  1  1  5  2 -1  0  2  1  1 21 4.0529   557
  1  1  1  5  2  0  1  3  1  1 21 4.0529   557
  1  1  1 21  2  0  1  3  1  1  5 4.0529   557
  3  1  1  5 -2  0 -1  1  1  1 21 4.0529   557
  3  1  1 21 -2  0 -1  1  1  1  5 4.0529   557
  1  1  1 21  2  0  1  3  2  1  5 4.0529   558
  2  1  1 21 -2  1  0  4  2  1  5 4.0529   558
  3  1  1 21 -2  0 -1  1  2  1  5 4.0529   558
  1  2  1  5  2  0  1  3  1  1 21 4.0529   559
  3  2  1  5 -2  0 -1  1  1  1 21 4.0529   559
  4  2  1  5  2 -1  0  2  1  1 21 4.0529   559
  3  1  1 13  0  0  0  4  1  1 20 4.0812   565
  4  1  1 20  0  0  0  3  1  1 13 4.0812   565
  1  1  1 20  0 -1  0  2  2  1 13 4.0812   566
  3  1  1 20  0  1  0  4  2  1 13 4.0812   566
  4  1  1 20  0  0  0  3  2  1 13 4.0812   566
  2  2  1 13  0  1  0  1  1  1 20 4.0812   567
  3  2  1 13  0  0  0  4  1  1 20 4.0812   567
  4  2  1 13  0 -1  0  3  1  1 20 4.0812   567
  1  1  1 13  0  0  0  2  1  1 20 4.0812   565
  1  1  1 20  0 -1  0  2  1  1 13 4.0812   565
  2  1  1 13  0  1  0  1  1  1 20 4.0812   565
  2  1  1 20  0  0  0  1  1  1 13 4.0812   565
  3  1  1 20  0  1  0  4  1  1 13 4.0812   565
  4  1  1 13  0 -1  0  3  1  1 20 4.0812   565
  2  1  1 20  0  0  0  1  2  1 13 4.0812   566
  1  2  1 13  0  0  0  2  1  1 20 4.0812   567
  1  2  1 20  1 -1  0  2  2  1 21 4.0893   572
  2  2  1 21 -1  1  0  1  2  1 20 4.0893   572
  3  2  1 20 -1  1  0  4  2  1 21 4.0893   572
  4  2  1 21  1 -1  0  3  2  1 20 4.0893   572
  1  2  1 21  1  0  0  2  2  1 20 4.0893   572
  2  2  1 20 -1  0  0  1  2  1 21 4.0893   572
  3  2  1 21 -1  0  0  4  2  1 20 4.0893   572
  4  2  1 20  1  0  0  3  2  1 21 4.0893   572
  4  1  1  6  1 -1  0  2  2  1  2 4.0927   570
  2  2  1  2 -1  1  0  4  1  1  6 4.0927   571
  2  2  1  2 -1  1  0  4  2  1  6 4.0927   572
  4  2  1  6  1 -1  0  2  2  1  2 4.0927   572
  1  1  1  2  1  0  1  3  1  1  6 4.0927   569
  2  1  1  2 -1  1  0  4  1  1  6 4.0927   569
  3  1  1  6 -1  0 -1  1  1  1  2 4.0927   569
  4  1  1  6  1 -1  0  2  1  1  2 4.0927   569
  1  1  1  2  1  0  1  3  2  1  6 4.0927   570
  1  1  1  6  1  0  1  3  2  1  2 4.0927   570
  2  1  1  2 -1  1  0  4  2  1  6 4.0927   570
  2  1  1  6 -1  1  0  4  2  1  2 4.0927   570
  3  1  1  6 -1  0 -1  1  2  1  2 4.0927   570
  4  1  1  2  1 -1  0  2  2  1  6 4.0927   570
  1  2  1  2  1  0  1  3  1  1  6 4.0927   571
  2  2  1  6 -1  1  0  4  1  1  2 4.0927   571
  3  2  1  2 -1  0 -1  1  1  1  6 4.0927   571
  3  2  1  6 -1  0 -1  1  1  1  2 4.0927   571
  4  2  1  2  1 -1  0  2  1  1  6 4.0927   571
  4  2  1  6  1 -1  0  2  1  1  2 4.0927   571
  1  2  1  2  1  0  1  3  2  1  6 4.0927   572
  1  2  1  6  1  0  1  3  2  1  2 4.0927   572
  2  2  1  6 -1  1  0  4  2  1  2 4.0927   572
  3  2  1  2 -1  0 -1  1  2  1  6 4.0927   572
  3  2  1  6 -1  0 -1  1  2  1  2 4.0927   572
  4  2  1  2  1 -1  0  2  2  1  6 4.0927   572
  1  1  1  6  1  0  1  3  1  1  2 4.0927   569
  2  1  1  6 -1  1  0  4  1  1  2 4.0927   569
  3  1  1  2 -1  0 -1  1  1  1  6 4.0927   569
  4  1  1  2  1 -1  0  2  1  1  6 4.0927   569
  3  1  1  2 -1  0 -1  1  2  1  6 4.0927   570
  1  2  1  6  1  0  1  3  1  1  2 4.0927   571
  4  1  1  4  1 -1  0  2  2  1  2 4.0949   574
  2  2  1  2 -1  1  0  4  1  1  4 4.0949   575
  2  2  1  2 -1  1  0  4  2  1  4 4.0949   576
  4  2  1  4  1 -1  0  2  2  1  2 4.0949   576
  2  1  1  2 -1  1  0  4  1  1  4 4.0949   573
  4  1  1  4  1 -1  0  2  1  1  2 4.0949   573
  1  1  1  2  1  0  1  3  2  1  4 4.0949   574
  1  1  1  4  1  0  1  3  2  1  2 4.0949   574
  2  1  1  2 -1  1  0  4  2  1  4 4.0949   574
  4  1  1  2  1 -1  0  2  2  1  4 4.0949   574
  2  2  1  4 -1  1  0  4  1  1  2 4.0949   575
  3  2  1  2 -1  0 -1  1  1  1  4 4.0949   575
  3  2  1  4 -1  0 -1  1  1  1  2 4.0949   575
  4  2  1  4  1 -1  0  2  1  1  2 4.0949   575
  1  2  1  2  1  0  1  3  2  1  4 4.0949   576
  1  2  1  4  1  0  1  3  2  1  2 4.0949   576
  2  2  1  4 -1  1  0  4  2  1  2 4.0949   576
  3  2  1  2 -1  0 -1  1  2  1  4 4.0949   576
  3  2  1  4 -1  0 -1  1  2  1  2 4.0949   576
  4  2  1  2  1 -1  0  2  2  1  4 4.0949   576
  1  1  1  2  1  0  1  3  1  1  4 4.0950   573
  1  1  1  4  1  0  1  3  1  1  2 4.0950   573
  2  1  1  4 -1  1  0  4  1  1  2 4.0950   573
  3  1  1  2 -1  0 -1  1  1  1  4 4.0950   573
  3  1  1  4 -1  0 -1  1  1  1  2 4.0950   573
  4  1  1  2  1 -1  0  2  1  1  4 4.0950   573
  2  1  1  4 -1  1  0  4  2  1  2 4.0950   574
  3  1  1  2 -1  0 -1  1  2  1  4 4.0950   574
  3  1  1  4 -1  0 -1  1  2  1  2 4.0950   574
  1  2  1  2  1  0  1  3  1  1  4 4.0950   575
  1  2  1  4  1  0  1  3  1  1  2 4.0950   575
  4  2  1  2  1 -1  0  2  1  1  4 4.0950   575
  1  1  1  5  2  0  1  3  2  1 21 4.1006   578
  3  2  1 21 -2  0 -1  1  1  1  5 4.1006   579
  1  2  1  5  2  0  1  3  2  1 21 4.1006   580
  2  2  1  5 -2  1  0  4  2  1 21 4.1006   580
  3  2  1 21 -2  0 -1  1  2  1  5 4.1006   580
  4  2  1 21  2 -1  0  2  2  1  5 4.1006   580
  2  1  1  5 -2  1  0  4  2  1 21 4.1006   578
  3  1  1  5 -2  0 -1  1  2  1 21 4.1006   578
  4  1  1  5  2 -1  0  2  2  1 21 4.1006   578
  1  2  1 21  2  0  1  3  1  1  5 4.1006   579
  2  2  1 21 -2  1  0  4  1  1  5 4.1006   579
  4  2  1 21  2 -1  0  2  1  1  5 4.1006   579
  1  2  1 21  2  0  1  3  2  1  5 4.1006   580
  3  2  1  5 -2  0 -1  1  2  1 21 4.1006   580
  2  2  1 21 -2  1  0  4  2  1  5 4.1006   580
  4  2  1  5  2 -1  0  2  2  1 21 4.1006   580
  3  1  1  5 -1  1  0  4  1  1 13 4.1072   581
  4  1  1 13  1 -1  0  3  1  1  5 4.1072   581
  3  1  1  5 -1  1  0  4  2  1 13 4.1072   582
  4  2  1 13  1 -1  0  3  1  1  5 4.1072   583
  1  1  1  5  1 -1  0  2  1  1 13 4.1073   581
  1  1  1 13  1  0  0  2  1  1  5 4.1073   581
  2  1  1  5 -1  0  0  1  1  1 13 4.1073   581
  2  1  1 13 -1  1  0  1  1  1  5 4.1073   581
  2  1  1  5 -1  0  0  1  2  1 13 4.1073   582
  2  1  1 13 -1  1  0  1  2  1  5 4.1073   582
  1  2  1  5  1 -1  0  2  1  1 13 4.1073   583
  1  2  1 13  1  0  0  2  1  1  5 4.1073   583
  3  1  1 13 -1  0  0  4  1  1  5 4.1073   581
  4  1  1  5  1  0  0  3  1  1 13 4.1073   581
  1  1  1  5  1 -1  0  2  2  1 13 4.1073   582
  1  1  1 13  1  0  0  2  2  1  5 4.1073   582
  3  1  1 13 -1  0  0  4  2  1  5 4.1073   582
  4  1  1 13  1 -1  0  3  2  1  5 4.1073   582
  2  2  1  5 -1  0  0  1  1  1 13 4.1073   583
  2  2  1 13 -1  1  0  1  1  1  5 4.1073   583
  3  2  1  5 -1  1  0  4  1  1 13 4.1073   583
  4  2  1  5  1  0  0  3  1  1 13 4.1073   583
  1  2  1  5  1 -1  0  2  2  1 13 4.1073   584
  1  2  1 13  1  0  0  2  2  1  5 4.1073   584
  2  2  1  5 -1  0  0  1  2  1 13 4.1073   584
  2  2  1 13 -1  1  0  1  2  1  5 4.1073   584
  3  2  1  5 -1  1  0  4  2  1 13 4.1073   584
  3  2  1 13 -1  0  0  4  2  1  5 4.1073   584
  4  2  1  5  1  0  0  3  2  1 13 4.1073   584
  4  2  1 13  1 -1  0  3  2  1  5 4.1073   584
  4  1  1  5  1  0  0  3  2  1 13 4.1073   582
  3  2  1 13 -1  0  0  4  1  1  5 4.1073   583
  2  1  1  5 -1  0  0  3  1  1 11 4.1167   585
  3  1  1 11  1  0  0  2  1  1  5 4.1167   585
  2  1  1  5 -1  0  0  3  2  1 11 4.1167   586
  3  1  1 11  1  0  0  2  2  1  5 4.1167   586
  2  2  1  5 -1  0  0  3  1  1 11 4.1167   587
  3  2  1 11  1  0  0  2  1  1  5 4.1167   587
  2  2  1  5 -1  0  0  3  2  1 11 4.1167   588
  3  2  1 11  1  0  0  2  2  1  5 4.1167   588
  1  1  1  5  1  0  1  4  1  1 11 4.1167   585
  1  1  1 11 -1  0  0  4  1  1  5 4.1167   585
  4  1  1  5  1  0  0  1  1  1 11 4.1167   585
  4  1  1 11 -1  0 -1  1  1  1  5 4.1167   585
  1  1  1  5  1  0  1  4  2  1 11 4.1167   586
  1  1  1 11 -1  0  0  4  2  1  5 4.1167   586
  2  1  1 11  1  0  1  3  2  1  5 4.1167   586
  4  1  1  5  1  0  0  1  2  1 11 4.1167   586
  4  1  1 11 -1  0 -1  1  2  1  5 4.1167   586
  1  2  1  5  1  0  1  4  1  1 11 4.1167   587
  1  2  1 11 -1  0  0  4  1  1  5 4.1167   587
  3  2  1  5 -1  0 -1  2  1  1 11 4.1167   587
  4  2  1  5  1  0  0  1  1  1 11 4.1167   587
  4  2  1 11 -1  0 -1  1  1  1  5 4.1167   587
  1  2  1  5  1  0  1  4  2  1 11 4.1167   588
  1  2  1 11 -1  0  0  4  2  1  5 4.1167   588
  2  2  1 11  1  0  1  3  2  1  5 4.1167   588
  3  2  1  5 -1  0 -1  2  2  1 11 4.1167   588
  4  2  1  5  1  0  0  1  2  1 11 4.1167   588
  4  2  1 11 -1  0 -1  1  2  1  5 4.1167   588
  2  1  1 11  1  0  1  3  1  1  5 4.1167   585
  3  1  1  5 -1  0 -1  2  1  1 11 4.1167   585
  3  1  1  5 -1  0 -1  2  2  1 11 4.1167   586
  2  2  1 11  1  0  1  3  1  1  5 4.1167   587
  3  1  1  7 -1  1  0  4  1  1 14 4.1233   589
  4  1  1 14  1 -1  0  3  1  1  7 4.1233   589
  1  1  1  7  1 -1  0  2  1  1 14 4.1233   589
  1  1  1 14  1  0  0  2  1  1  7 4.1233   589
  2  1  1  7 -1  0  0  1  1  1 14 4.1233   589
  2  1  1 14 -1  1  0  1  1  1  7 4.1233   589
  3  1  1 14 -1  0  0  4  1  1  7 4.1233   589
  4  1  1  7  1  0  0  3  1  1 14 4.1233   589
  1  1  1  7  1 -1  0  2  2  1 14 4.1233   590
  2  1  1  7 -1  0  0  1  2  1 14 4.1233   590
  2  1  1 14 -1  1  0  1  2  1  7 4.1233   590
  3  1  1  7 -1  1  0  4  2  1 14 4.1233   590
  3  1  1 14 -1  0  0  4  2  1  7 4.1233   590
  4  1  1 14  1 -1  0  3  2  1  7 4.1233   590
  1  2  1  7  1 -1  0  2  1  1 14 4.1233   591
  1  2  1 14  1  0  0  2  1  1  7 4.1233   591
  2  2  1 14 -1  1  0  1  1  1  7 4.1233   591
  3  2  1  7 -1  1  0  4  1  1 14 4.1233   591
  4  2  1  7  1  0  0  3  1  1 14 4.1233   591
  4  2  1 14  1 -1  0  3  1  1  7 4.1233   591
  1  2  1  7  1 -1  0  2  2  1 14 4.1233   592
  2  2  1 14 -1  1  0  1  2  1  7 4.1233   592
  3  2  1  7 -1  1  0  4  2  1 14 4.1233   592
  4  2  1 14  1 -1  0  3  2  1  7 4.1233   592
  1  1  1 14  1  0  0  2  2  1  7 4.1233   590
  4  1  1  7  1  0  0  3  2  1 14 4.1233   590
  2  2  1  7 -1  0  0  1  1  1 14 4.1233   591
  3  2  1 14 -1  0  0  4  1  1  7 4.1233   591
  1  2  1 14  1  0  0  2  2  1  7 4.1233   592
  2  2  1  7 -1  0  0  1  2  1 14 4.1233   592
  3  2  1 14 -1  0  0  4  2  1  7 4.1233   592
  4  2  1  7  1  0  0  3  2  1 14 4.1233   592
  2  1  1  8 -1  1  0  4  1  1  4 4.1254   589
  4  1  1  4  1 -1  0  2  1  1  8 4.1254   589
  1  1  1  8  1  0  1  3  2  1  4 4.1254   590
  2  1  1  8 -1  1  0  4  2  1  4 4.1254   590
  4  1  1  4  1 -1  0  2  2  1  8 4.1254   590
  4  1  1  8  1 -1  0  2  2  1  4 4.1254   590
  2  2  1  4 -1  1  0  4  1  1  8 4.1254   591
  2  2  1  8 -1  1  0  4  1  1  4 4.1254   591
  3  2  1  4 -1  0 -1  1  1  1  8 4.1254   591
  4  2  1  4  1 -1  0  2  1  1  8 4.1254   591
  1  2  1  8  1  0  1  3  2  1  4 4.1254   592
  2  2  1  4 -1  1  0  4  2  1  8 4.1254   592
  2  2  1  8 -1  1  0  4  2  1  4 4.1254   592
  3  2  1  4 -1  0 -1  1  2  1  8 4.1254   592
  4  2  1  4  1 -1  0  2  2  1  8 4.1254   592
  4  2  1  8  1 -1  0  2  2  1  4 4.1254   592
  1  1  1  4  1  0  1  3  1  1  8 4.1254   589
  1  1  1  8  1  0  1  3  1  1  4 4.1254   589
  2  1  1  4 -1  1  0  4  1  1  8 4.1254   589
  3  1  1  4 -1  0 -1  1  1  1  8 4.1254   589
  3  1  1  8 -1  0 -1  1  1  1  4 4.1254   589
  4  1  1  8  1 -1  0  2  1  1  4 4.1254   589
  1  1  1  4  1  0  1  3  2  1  8 4.1254   590
  2  1  1  4 -1  1  0  4  2  1  8 4.1254   590
  3  1  1  4 -1  0 -1  1  2  1  8 4.1254   590
  3  1  1  8 -1  0 -1  1  2  1  4 4.1254   590
  1  2  1  4  1  0  1  3  1  1  8 4.1254   591
  1  2  1  8  1  0  1  3  1  1  4 4.1254   591
  3  2  1  8 -1  0 -1  1  1  1  4 4.1254   591
  4  2  1  8  1 -1  0  2  1  1  4 4.1254   591
  1  2  1  4  1  0  1  3  2  1  8 4.1254   592
  3  2  1  8 -1  0 -1  1  2  1  4 4.1254   592
  3  1  1 12 -1  1  0  4  1  1 21 4.1272   589
  3  1  1 21 -1  0  0  4  1  1 12 4.1272   589
  4  1  1 12  1  0  0  3  1  1 21 4.1272   589
  4  1  1 21  1 -1  0  3  1  1 12 4.1272   589
  4  1  1 21  1 -1  0  3  2  1 12 4.1272   590
  3  2  1 12 -1  1  0  4  1  1 21 4.1272   591
  1  1  1 12  1 -1  0  2  1  1 21 4.1272   589
  1  1  1 21  1  0  0  2  1  1 12 4.1272   589
  2  1  1 12 -1  0  0  1  1  1 21 4.1272   589
  2  1  1 21 -1  1  0  1  1  1 12 4.1272   589
  1  1  1 21  1  0  0  2  2  1 12 4.1272   590
  2  1  1 21 -1  1  0  1  2  1 12 4.1272   590
  3  1  1 21 -1  0  0  4  2  1 12 4.1272   590
  1  2  1 12  1 -1  0  2  1  1 21 4.1272   591
  2  2  1 12 -1  0  0  1  1  1 21 4.1272   591
  4  2  1 12  1  0  0  3  1  1 21 4.1272   591
  3  1  1  6 -1  1  0  4  1  1 13 4.1378   597
  4  1  1 13  1 -1  0  3  1  1  6 4.1378   597
  1  1  1  6  1 -1  0  2  1  1 13 4.1378   597
  1  1  1 13  1  0  0  2  1  1  6 4.1378   597
  2  1  1  6 -1  0  0  1  1  1 13 4.1378   597
  2  1  1 13 -1  1  0  1  1  1  6 4.1378   597
  2  1  1  6 -1  0  0  1  2  1 13 4.1378   598
  2  1  1 13 -1  1  0  1  2  1  6 4.1378   598
  3  1  1  6 -1  1  0  4  2  1 13 4.1378   598
  4  1  1 13  1 -1  0  3  2  1  6 4.1378   598
  1  2  1  6  1 -1  0  2  1  1 13 4.1378   599
  1  2  1 13  1  0  0  2  1  1  6 4.1378   599
  3  2  1  6 -1  1  0  4  1  1 13 4.1378   599
  4  2  1 13  1 -1  0  3  1  1  6 4.1378   599
  3  1  1 13 -1  0  0  4  1  1  6 4.1378   597
  4  1  1  6  1  0  0  3  1  1 13 4.1378   597
  1  1  1  6  1 -1  0  2  2  1 13 4.1378   598
  1  1  1 13  1  0  0  2  2  1  6 4.1378   598
  3  1  1 13 -1  0  0  4  2  1  6 4.1378   598
  2  2  1  6 -1  0  0  1  1  1 13 4.1378   599
  2  2  1 13 -1  1  0  1  1  1  6 4.1378   599
  4  2  1  6  1  0  0  3  1  1 13 4.1378   599
  1  2  1  6  1 -1  0  2  2  1 13 4.1378   600
  1  2  1 13  1  0  0  2  2  1  6 4.1378   600
  2  2  1  6 -1  0  0  1  2  1 13 4.1378   600
  2  2  1 13 -1  1  0  1  2  1  6 4.1378   600
  3  2  1  6 -1  1  0  4  2  1 13 4.1378   600
  4  2  1 13  1 -1  0  3  2  1  6 4.1378   600
  4  1  1  6  1  0  0  3  2  1 13 4.1378   598
  3  2  1 13 -1  0  0  4  1  1  6 4.1378   599
  3  2  1 13 -1  0  0  4  2  1  6 4.1378   600
  4  2  1  6  1  0  0  3  2  1 13 4.1378   600
  1  1  1 10  1 -1  0  2  1  1 14 4.1462   601
  1  1  1 14  1  0  0  2  1  1 10 4.1462   601
  2  1  1 10 -1  0  0  1  1  1 14 4.1462   601
  2  1  1 14 -1  1  0  1  1  1 10 4.1462   601
  3  1  1 10 -1  1  0  4  1  1 14 4.1462   601
  3  1  1 14 -1  0  0  4  1  1 10 4.1462   601
  4  1  1 10  1  0  0  3  1  1 14 4.1462   601
  4  1  1 14  1 -1  0  3  1  1 10 4.1462   601
  2  1  1 10 -1  0  0  1  2  1 14 4.1462   602
  2  1  1 14 -1  1  0  1  2  1 10 4.1462   602
  3  1  1 10 -1  1  0  4  2  1 14 4.1462   602
  4  1  1 10  1  0  0  3  2  1 14 4.1462   602
  4  1  1 14  1 -1  0  3  2  1 10 4.1462   602
  1  2  1 10  1 -1  0  2  1  1 14 4.1462   603
  1  2  1 14  1  0  0  2  1  1 10 4.1462   603
  3  2  1 10 -1  1  0  4  1  1 14 4.1462   603
  3  2  1 14 -1  0  0  4  1  1 10 4.1462   603
  4  2  1 14  1 -1  0  3  1  1 10 4.1462   603
  3  2  1 10 -1  1  0  4  2  1 14 4.1462   604
  4  2  1 14  1 -1  0  3  2  1 10 4.1462   604
  1  1  1 10  1 -1  0  2  2  1 14 4.1462   602
  1  1  1 14  1  0  0  2  2  1 10 4.1462   602
  3  1  1 14 -1  0  0  4  2  1 10 4.1462   602
  2  2  1 10 -1  0  0  1  1  1 14 4.1462   603
  2  2  1 14 -1  1  0  1  1  1 10 4.1462   603
  4  2  1 10  1  0  0  3  1  1 14 4.1462   603
  1  2  1 10  1 -1  0  2  2  1 14 4.1462   604
  1  2  1 14  1  0  0  2  2  1 10 4.1462   604
  2  2  1 10 -1  0  0  1  2  1 14 4.1462   604
  2  2  1 14 -1  1  0  1  2  1 10 4.1462   604
  3  2  1 14 -1  0  0  4  2  1 10 4.1462   604
  4  2  1 10  1  0  0  3  2  1 14 4.1462   604
  4  1  1 12  1  0  0  3  2  1 21 4.1819   622
  3  2  1 21 -1  0  0  4  1  1 12 4.1819   623
  1  1  1 12  1 -1  0  2  2  1 21 4.1819   622
  2  1  1 12 -1  0  0  1  2  1 21 4.1819   622
  3  1  1 12 -1  1  0  4  2  1 21 4.1819   622
  1  2  1 21  1  0  0  2  1  1 12 4.1819   623
  2  2  1 21 -1  1  0  1  1  1 12 4.1819   623
  4  2  1 21  1 -1  0  3  1  1 12 4.1819   623
  1  2  1 12  1 -1  0  2  2  1 21 4.1819   624
  1  2  1 21  1  0  0  2  2  1 12 4.1819   624
  2  2  1 12 -1  0  0  1  2  1 21 4.1819   624
  2  2  1 21 -1  1  0  1  2  1 12 4.1819   624
  3  2  1 12 -1  1  0  4  2  1 21 4.1819   624
  3  2  1 21 -1  0  0  4  2  1 12 4.1819   624
  4  2  1 12  1  0  0  3  2  1 21 4.1819   624
  4  2  1 21  1 -1  0  3  2  1 12 4.1819   624
