# Supplementary material for: A Process for Modelling Diffuse Scattering from Disordered Molecular Crystals, Illustrated by Application to Monoclinic 9-Chloro-10-methylanthracene
Source: Hindawi journal article supplement (doi:10.1155/2015/878463), 2015-01-01
Supplement: f2 [file 878463.f2.zip › 878463.f2/CMA_simulations/CMA_contacts_initial]

  ol  oz  om oat  da  db  dc  dl  dz  dm dat  length  type
   1   1   1   2  -1   0   0   1   1   1  22 6.15841        1
   1   1   1   2  -1   0   0   1   1   1  23 6.85410        2
   1   1   1   2  -1   0   0   1   2   1  22 6.15841        3
   1   1   1   2  -1   0   0   1   2   1  23 6.85410        4
   1   1   1   2  -1   0   0   1   2   1  26 6.60745        5
   1   1   1   2  -1   0   0   1   2   1  27 6.71487        6
   1   1   1   2  -1   0   0   4   1   1  23 6.54026        7
   1   1   1   2  -1   0   0   4   2   1  23 6.54026        8
   1   1   1   2   0  -1   0   2   1   1  17 6.85616        9
   1   1   1   2   0  -1   0   2   2   1  17 6.85616       10
   1   1   1   2   0   0   0   2   1   1  16 6.51397       11
   1   1   1   2   0   0   0   2   1   1  17 6.91860       12
   1   1   1   2   0   0   0   2   1   1  26 6.75976       13
   1   1   1   2   0   0   0   2   2   1  16 6.51397       14
   1   1   1   2   0   0   0   2   2   1  17 6.91859       15
   1   1   1   2   0   0   0   4   1   1   3 6.64461       16
   1   1   1   2   0   0   0   4   1   1   4 6.31059       17
   1   1   1   2   0   0   0   4   1   1   5 5.11837       18
   1   1   1   2   0   0   0   4   1   1   6 4.03586       19
   1   1   1   2   0   0   0   4   1   1   7 4.47294       20
   1   1   1   2   0   0   0   4   1   1   8 5.83816       21
   1   1   1   2   0   0   0   4   1   1   9 6.63489       22
   1   1   1   2   0   0   0   4   1   1  20 6.31936       23
   1   1   1   2   0   0   0   4   1   1  23 5.22096       24
   1   1   1   2   0   0   0   4   1   1  24 3.12536       25
   1   1   1   2   0   0   0   4   1   1  25 4.04483       26
   1   1   1   2   0   0   0   4   1   1  27 6.07859       27
   1   1   1   2   0   0   0   4   1   1  28 5.58552       28
   1   1   1   2   0   0   0   4   2   1   3 6.64460       29
   1   1   1   2   0   0   0   4   2   1   4 6.31058       30
   1   1   1   2   0   0   0   4   2   1   5 5.11837       31
   1   1   1   2   0   0   0   4   2   1   6 4.03586       32
   1   1   1   2   0   0   0   4   2   1   7 4.47294       33
   1   1   1   2   0   0   0   4   2   1   8 5.83816       34
   1   1   1   2   0   0   0   4   2   1   9 6.63489       35
   1   1   1   2   0   0   0   4   2   1  20 6.29425       36
   1   1   1   2   0   0   0   4   2   1  23 5.22095       37
   1   1   1   2   0   0   0   4   2   1  24 3.12536       38
   1   1   1   2   0   0   0   4   2   1  25 4.04482       39
   1   1   1   2   0   1   0   1   1   1  27 6.89873       40
   1   1   1   2   0   1   1   4   1   1  18 6.32995       41
   1   1   1   2   0   1   1   4   1   1  19 6.31010       42
   1   1   1   2   0   1   1   4   2   1  18 6.32996       43
   1   1   1   2   0   1   1   4   2   1  19 6.31010       44
   1   1   1   2   1  -1   0   2   1   1   2 5.88807       45
   1   1   1   2   1  -1   0   2   1   1  10 6.48658       46
   1   1   1   2   1  -1   0   2   1   1  11 6.50802       47
   1   1   1   2   1  -1   0   2   1   1  12 5.56924       48
   1   1   1   2   1  -1   0   2   1   1  13 4.31986       49
   1   1   1   2   1  -1   0   2   1   1  14 4.21197       50
   1   1   1   2   1  -1   0   2   1   1  15 5.41396       51
   1   1   1   2   1  -1   0   2   1   1  17 5.97877       52
   1   1   1   2   1  -1   0   2   1   1  18 3.73405       53
   1   1   1   2   1  -1   0   2   1   1  19 3.51016       54
   1   1   1   2   1  -1   0   2   1   1  21 5.22015       55
   1   1   1   2   1  -1   0   2   2   1   2 5.88807       56
   1   1   1   2   1  -1   0   2   2   1  10 6.48658       57
   1   1   1   2   1  -1   0   2   2   1  11 6.50802       58
   1   1   1   2   1  -1   0   2   2   1  12 5.56925       59
   1   1   1   2   1  -1   0   2   2   1  13 4.31987       60
   1   1   1   2   1  -1   0   2   2   1  14 4.21197       61
   1   1   1   2   1  -1   0   2   2   1  15 5.41396       62
   1   1   1   2   1  -1   0   2   2   1  17 5.97878       63
   1   1   1   2   1  -1   0   2   2   1  18 3.73406       64
   1   1   1   2   1  -1   0   2   2   1  19 3.51016       65
   1   1   1   2   1  -1   0   2   2   1  21 5.24159       66
   1   1   1   2   1  -1   0   2   2   1  26 5.74259       67
   1   1   1   2   1  -1   0   2   2   1  27 5.39519       68
   1   1   1   2   1  -1   0   2   2   1  28 4.37364       69
   1   1   1   2   1  -1   1   3   1   1   7 6.76815       70
   1   1   1   2   1  -1   1   3   1   1  24 6.42246       71
   1   1   1   2   1  -1   1   3   1   1  25 5.95838       72
   1   1   1   2   1  -1   1   3   1   1  27 6.12289       73
   1   1   1   2   1  -1   1   3   1   1  28 6.96100       74
   1   1   1   2   1  -1   1   3   2   1   7 6.76815       75
   1   1   1   2   1  -1   1   3   2   1  24 6.42245       76
   1   1   1   2   1  -1   1   3   2   1  25 5.95837       77
   1   1   1   2   1   0   0   1   1   1   9 6.41736       78
   1   1   1   2   1   0   0   1   1   1  10 6.00935       79
   1   1   1   2   1   0   0   1   1   1  11 4.89619       80
   1   1   1   2   1   0   0   1   1   1  12 5.01585       81
   1   1   1   2   1   0   0   1   1   1  13 6.17664       82
   1   1   1   2   1   0   0   1   1   1  16 4.24236       83
   1   1   1   2   1   0   0   1   1   1  17 4.48925       84
   1   1   1   2   1   0   0   1   1   1  18 6.55633       85
   1   1   1   2   1   0   0   1   1   1  20 5.77513       86
   1   1   1   2   1   0   0   1   1   1  26 4.92766       87
   1   1   1   2   1   0   0   1   1   1  27 6.56006       88
   1   1   1   2   1   0   0   1   1   1  28 5.84488       89
   1   1   1   2   1   0   0   1   2   1   9 6.41736       90
   1   1   1   2   1   0   0   1   2   1  10 6.00935       91
   1   1   1   2   1   0   0   1   2   1  11 4.89619       92
   1   1   1   2   1   0   0   1   2   1  12 5.01585       93
   1   1   1   2   1   0   0   1   2   1  13 6.17664       94
   1   1   1   2   1   0   0   1   2   1  16 4.24236       95
   1   1   1   2   1   0   0   1   2   1  17 4.48925       96
   1   1   1   2   1   0   0   1   2   1  18 6.55633       97
   1   1   1   2   1   0   0   1   2   1  20 5.75117       98
   1   1   1   2   1   0   0   2   1   1   2 5.88807       99
   1   1   1   2   1   0   0   2   1   1   3 5.92578      100
   1   1   1   2   1   0   0   2   1   1   4 6.79698      101
   1   1   1   2   1   0   0   2   1   1   6 6.89489      102
   1   1   1   2   1   0   0   2   1   1   7 6.06693      103
   1   1   1   2   1   0   0   2   1   1   8 5.49975      104
   1   1   1   2   1   0   0   2   1   1   9 5.02238      105
   1   1   1   2   1   0   0   2   1   1  10 4.99804      106
   1   1   1   2   1   0   0   2   1   1  11 5.10874      107
   1   1   1   2   1   0   0   2   1   1  12 5.63032      108
   1   1   1   2   1   0   0   2   1   1  13 6.04478      109
   1   1   1   2   1   0   0   2   1   1  14 5.96980      110
   1   1   1   2   1   0   0   2   1   1  15 5.46247      111
   1   1   1   2   1   0   0   2   1   1  16 5.16498      112
   1   1   1   2   1   0   0   2   1   1  17 6.05027      113
   1   1   1   2   1   0   0   2   1   1  18 6.72488      114
   1   1   1   2   1   0   0   2   1   1  19 6.59883      115
   1   1   1   2   1   0   0   2   1   1  20 5.17456      116
   1   1   1   2   1   0   0   2   1   1  21 6.93521      117
   1   1   1   2   1   0   0   2   1   1  25 6.11938      118
   1   1   1   2   1   0   0   2   1   1  26 5.17403      119
   1   1   1   2   1   0   0   2   1   1  27 4.66267      120
   1   1   1   2   1   0   0   2   1   1  28 6.15942      121
   1   1   1   2   1   0   0   2   2   1   2 5.88807      122
   1   1   1   2   1   0   0   2   2   1   3 5.92579      123
   1   1   1   2   1   0   0   2   2   1   4 6.79699      124
   1   1   1   2   1   0   0   2   2   1   6 6.89490      125
   1   1   1   2   1   0   0   2   2   1   7 6.06694      126
   1   1   1   2   1   0   0   2   2   1   8 5.49975      127
   1   1   1   2   1   0   0   2   2   1   9 5.02238      128
   1   1   1   2   1   0   0   2   2   1  10 4.99804      129
   1   1   1   2   1   0   0   2   2   1  11 5.10874      130
   1   1   1   2   1   0   0   2   2   1  12 5.63032      131
   1   1   1   2   1   0   0   2   2   1  13 6.04478      132
   1   1   1   2   1   0   0   2   2   1  14 5.96980      133
   1   1   1   2   1   0   0   2   2   1  15 5.46248      134
   1   1   1   2   1   0   0   2   2   1  16 5.16498      135
   1   1   1   2   1   0   0   2   2   1  17 6.05026      136
   1   1   1   2   1   0   0   2   2   1  18 6.72487      137
   1   1   1   2   1   0   0   2   2   1  19 6.59884      138
   1   1   1   2   1   0   0   2   2   1  20 5.22448      139
   1   1   1   2   1   0   0   2   2   1  21 6.90344      140
   1   1   1   2   1   0   0   2   2   1  25 6.11939      141
   1   1   1   2   1   0   0   2   2   1  27 6.56037      142
   1   1   1   2   1   0   0   3   1   1  18 6.86960      143
   1   1   1   2   1   0   0   3   2   1  18 6.86961      144
   1   1   1   2   1   0   1   3   1   1   2 4.24235      145
   1   1   1   2   1   0   1   3   1   1   3 3.70221      146
   1   1   1   2   1   0   1   3   1   1   4 4.09495      147
   1   1   1   2   1   0   1   3   1   1   5 4.26896      148
   1   1   1   2   1   0   1   3   1   1   6 4.09270      149
   1   1   1   2   1   0   1   3   1   1   7 3.71794      150
   1   1   1   2   1   0   1   3   1   1   8 3.49515      151
   1   1   1   2   1   0   1   3   1   1   9 3.88761      152
   1   1   1   2   1   0   1   3   1   1  10 4.40650      153
   1   1   1   2   1   0   1   3   1   1  11 5.34763      154
   1   1   1   2   1   0   1   3   1   1  12 6.19969      155
   1   1   1   2   1   0   1   3   1   1  13 6.30974      156
   1   1   1   2   1   0   1   3   1   1  14 5.60315      157
   1   1   1   2   1   0   1   3   1   1  15 4.58112      158
   1   1   1   2   1   0   1   3   1   1  16 5.64720      159
   1   1   1   2   1   0   1   3   1   1  19 6.06890      160
   1   1   1   2   1   0   1   3   1   1  20 4.57080      161
   1   1   1   2   1   0   1   3   1   1  21 5.24896      162
   1   1   1   2   1   0   1   3   1   1  22 4.71112      163
   1   1   1   2   1   0   1   3   1   1  23 4.96658      164
   1   1   1   2   1   0   1   3   1   1  24 4.70532      165
   1   1   1   2   1   0   1   3   1   1  25 4.11580      166
   1   1   1   2   1   0   1   3   1   1  26 5.18175      167
   1   1   1   2   1   0   1   3   1   1  27 5.30745      168
   1   1   1   2   1   0   1   3   1   1  28 4.00990      169
   1   1   1   2   1   0   1   3   2   1   2 4.24234      170
   1   1   1   2   1   0   1   3   2   1   3 3.70220      171
   1   1   1   2   1   0   1   3   2   1   4 4.09494      172
   1   1   1   2   1   0   1   3   2   1   5 4.26895      173
   1   1   1   2   1   0   1   3   2   1   6 4.09270      174
   1   1   1   2   1   0   1   3   2   1   7 3.71794      175
   1   1   1   2   1   0   1   3   2   1   8 3.49514      176
   1   1   1   2   1   0   1   3   2   1   9 3.88761      177
   1   1   1   2   1   0   1   3   2   1  10 4.40650      178
   1   1   1   2   1   0   1   3   2   1  11 5.34763      179
   1   1   1   2   1   0   1   3   2   1  12 6.19968      180
   1   1   1   2   1   0   1   3   2   1  13 6.30973      181
   1   1   1   2   1   0   1   3   2   1  14 5.60314      182
   1   1   1   2   1   0   1   3   2   1  15 4.58110      183
   1   1   1   2   1   0   1   3   2   1  16 5.64720      184
   1   1   1   2   1   0   1   3   2   1  19 6.06888      185
   1   1   1   2   1   0   1   3   2   1  20 4.58906      186
   1   1   1   2   1   0   1   3   2   1  21 5.17287      187
   1   1   1   2   1   0   1   3   2   1  22 4.71110      188
   1   1   1   2   1   0   1   3   2   1  23 4.96657      189
   1   1   1   2   1   0   1   3   2   1  24 4.70533      190
   1   1   1   2   1   0   1   3   2   1  25 4.11581      191
   1   1   1   2   1   0   1   3   2   1  26 4.91896      192
   1   1   1   2   1   0   1   3   2   1  27 5.97139      193
   1   1   1   2   1   0   1   3   2   1  28 5.28561      194
   1   1   1   2   1   0   1   4   1   1  17 6.63944      195
   1   1   1   2   1   0   1   4   2   1  17 6.63945      196
   1   1   1   2   2   0   1   3   1   1   3 6.93803      197
   1   1   1   2   2   0   1   3   1   1   4 5.58550      198
   1   1   1   2   2   0   1   3   1   1   5 5.47115      199
   1   1   1   2   2   0   1   3   1   1   6 6.73670      200
   1   1   1   2   2   0   1   3   1   1  21 6.68524      201
   1   1   1   2   2   0   1   3   1   1  22 4.83536      202
   1   1   1   2   2   0   1   3   1   1  23 4.59851      203
   1   1   1   2   2   0   1   3   1   1  24 6.95801      204
   1   1   1   2   2   0   1   3   2   1   3 6.93803      205
   1   1   1   2   2   0   1   3   2   1   4 5.58550      206
   1   1   1   2   2   0   1   3   2   1   5 5.47115      207
   1   1   1   2   2   0   1   3   2   1   6 6.73671      208
   1   1   1   2   2   0   1   3   2   1  21 6.69874      209
   1   1   1   2   2   0   1   3   2   1  22 4.83536      210
   1   1   1   2   2   0   1   3   2   1  23 4.59852      211
   1   1   1   2   2   0   1   3   2   1  24 6.95802      212
   1   1   1   2   2   0   1   3   2   1  26 5.79406      213
   1   1   1   2   2   0   1   3   2   1  27 6.85539      214
   1   1   1   3  -1   0   0   1   1   1  22 6.21643      215
   1   1   1   3  -1   0   0   1   1   1  23 6.39014      216
   1   1   1   3  -1   0   0   1   2   1  22 6.21643      217
   1   1   1   3  -1   0   0   1   2   1  23 6.39014      218
   1   1   1   3   0  -1   0   2   1   1  17 6.57595      219
   1   1   1   3   0  -1   0   2   2   1  17 6.57596      220
   1   1   1   3   0   0   0   4   1   1   4 6.78091      221
   1   1   1   3   0   0   0   4   1   1   5 5.60420      222
   1   1   1   3   0   0   0   4   1   1   6 4.75228      223
   1   1   1   3   0   0   0   4   1   1   7 5.31893      224
   1   1   1   3   0   0   0   4   1   1   8 6.58768      225
   1   1   1   3   0   0   0   4   1   1  23 5.55636      226
   1   1   1   3   0   0   0   4   1   1  24 3.91431      227
   1   1   1   3   0   0   0   4   1   1  25 5.04531      228
   1   1   1   3   0   0   0   4   1   1  28 6.43498      229
   1   1   1   3   0   0   0   4   2   1   4 6.78090      230
   1   1   1   3   0   0   0   4   2   1   5 5.60420      231
   1   1   1   3   0   0   0   4   2   1   6 4.75228      232
   1   1   1   3   0   0   0   4   2   1   7 5.31893      233
   1   1   1   3   0   0   0   4   2   1   8 6.58768      234
   1   1   1   3   0   0   0   4   2   1  23 5.55636      235
   1   1   1   3   0   0   0   4   2   1  24 3.91430      236
   1   1   1   3   0   0   0   4   2   1  25 5.04531      237
   1   1   1   3   0   0   1   4   1   1   2 6.64463      238
   1   1   1   3   0   0   1   4   1   1  10 6.67552      239
   1   1   1   3   0   0   1   4   1   1  11 6.81523      240
   1   1   1   3   0   0   1   4   1   1  12 6.65921      241
   1   1   1   3   0   0   1   4   1   1  13 6.34791      242
   1   1   1   3   0   0   1   4   1   1  14 6.18427      243
   1   1   1   3   0   0   1   4   1   1  15 6.34458      244
   1   1   1   3   0   0   1   4   1   1  18 6.55626      245
   1   1   1   3   0   0   1   4   1   1  19 6.26284      246
   1   1   1   3   0   0   1   4   1   1  21 6.82902      247
   1   1   1   3   0   0   1   4   2   1   2 6.64463      248
   1   1   1   3   0   0   1   4   2   1  10 6.67553      249
   1   1   1   3   0   0   1   4   2   1  11 6.81525      250
   1   1   1   3   0   0   1   4   2   1  12 6.65923      251
   1   1   1   3   0   0   1   4   2   1  13 6.34792      252
   1   1   1   3   0   0   1   4   2   1  14 6.18428      253
   1   1   1   3   0   0   1   4   2   1  15 6.34459      254
   1   1   1   3   0   0   1   4   2   1  18 6.55627      255
   1   1   1   3   0   0   1   4   2   1  19 6.26284      256
   1   1   1   3   0   0   1   4   2   1  21 6.84111      257
   1   1   1   3   0   0   1   4   2   1  27 6.14713      258
   1   1   1   3   0   1   1   4   1   1  18 6.55189      259
   1   1   1   3   0   1   1   4   1   1  19 6.26284      260
   1   1   1   3   0   1   1   4   2   1  18 6.55190      261
   1   1   1   3   0   1   1   4   2   1  19 6.26284      262
   1   1   1   3   0   1   1   4   2   1  28 6.85046      263
   1   1   1   3   1  -1   0   2   1   1   2 5.92579      264
   1   1   1   3   1  -1   0   2   1   1  10 6.27898      265
   1   1   1   3   1  -1   0   2   1   1  11 6.13526      266
   1   1   1   3   1  -1   0   2   1   1  12 5.04340      267
   1   1   1   3   1  -1   0   2   1   1  13 3.76633      268
   1   1   1   3   1  -1   0   2   1   1  14 3.89948      269
   1   1   1   3   1  -1   0   2   1   1  15 5.26716      270
   1   1   1   3   1  -1   0   2   1   1  17 5.34773      271
   1   1   1   3   1  -1   0   2   1   1  18 2.96125      272
   1   1   1   3   1  -1   0   2   1   1  19 3.25581      273
   1   1   1   3   1  -1   0   2   1   1  21 5.38417      274
   1   1   1   3   1  -1   0   2   2   1   2 5.92579      275
   1   1   1   3   1  -1   0   2   2   1  10 6.27898      276
   1   1   1   3   1  -1   0   2   2   1  11 6.13526      277
   1   1   1   3   1  -1   0   2   2   1  12 5.04341      278
   1   1   1   3   1  -1   0   2   2   1  13 3.76634      279
   1   1   1   3   1  -1   0   2   2   1  14 3.89948      280
   1   1   1   3   1  -1   0   2   2   1  15 5.26717      281
   1   1   1   3   1  -1   0   2   2   1  17 5.34773      282
   1   1   1   3   1  -1   0   2   2   1  18 2.96125      283
   1   1   1   3   1  -1   0   2   2   1  19 3.25581      284
   1   1   1   3   1  -1   0   2   2   1  21 5.40717      285
   1   1   1   3   1  -1   0   2   2   1  26 6.10624      286
   1   1   1   3   1  -1   0   2   2   1  27 5.38302      287
   1   1   1   3   1  -1   0   2   2   1  28 4.67831      288
   1   1   1   3   1  -1   1   3   1   1   6 6.28550      289
   1   1   1   3   1  -1   1   3   1   1   7 5.86237      290
   1   1   1   3   1  -1   1   3   1   1   8 6.76857      291
   1   1   1   3   1  -1   1   3   1   1   9 6.83593      292
   1   1   1   3   1  -1   1   3   1   1  20 5.87604      293
   1   1   1   3   1  -1   1   3   1   1  24 5.89772      294
   1   1   1   3   1  -1   1   3   1   1  25 5.05885      295
   1   1   1   3   1  -1   1   3   1   1  26 6.35642      296
   1   1   1   3   1  -1   1   3   1   1  27 4.89322      297
   1   1   1   3   1  -1   1   3   1   1  28 5.91774      298
   1   1   1   3   1  -1   1   3   2   1   6 6.28549      299
   1   1   1   3   1  -1   1   3   2   1   7 5.86236      300
   1   1   1   3   1  -1   1   3   2   1   8 6.76856      301
   1   1   1   3   1  -1   1   3   2   1   9 6.83592      302
   1   1   1   3   1  -1   1   3   2   1  20 5.84552      303
   1   1   1   3   1  -1   1   3   2   1  24 5.89771      304
   1   1   1   3   1  -1   1   3   2   1  25 5.05884      305
   1   1   1   3   1   0   0   1   1   1   9 5.99409      306
   1   1   1   3   1   0   0   1   1   1  10 5.90074      307
   1   1   1   3   1   0   0   1   1   1  11 4.98883      308
   1   1   1   3   1   0   0   1   1   1  12 5.46777      309
   1   1   1   3   1   0   0   1   1   1  13 6.69199      310
   1   1   1   3   1   0   0   1   1   1  16 4.18505      311
   1   1   1   3   1   0   0   1   1   1  17 5.14672      312
   1   1   1   3   1   0   0   1   1   1  20 5.08885      313
   1   1   1   3   1   0   0   1   1   1  26 4.31372      314
   1   1   1   3   1   0   0   1   1   1  27 5.81753      315
   1   1   1   3   1   0   0   1   1   1  28 4.98615      316
   1   1   1   3   1   0   0   1   2   1   9 5.99409      317
   1   1   1   3   1   0   0   1   2   1  10 5.90074      318
   1   1   1   3   1   0   0   1   2   1  11 4.98883      319
   1   1   1   3   1   0   0   1   2   1  12 5.46777      320
   1   1   1   3   1   0   0   1   2   1  13 6.69199      321
   1   1   1   3   1   0   0   1   2   1  16 4.18505      322
   1   1   1   3   1   0   0   1   2   1  17 5.14672      323
   1   1   1   3   1   0   0   1   2   1  20 5.04786      324
   1   1   1   3   1   0   0   2   1   1   8 6.89956      325
   1   1   1   3   1   0   0   2   1   1   9 6.36809      326
   1   1   1   3   1   0   0   2   1   1  10 6.27441      327
   1   1   1   3   1   0   0   2   1   1  11 6.19873      328
   1   1   1   3   1   0   0   2   1   1  12 6.56947      329
   1   1   1   3   1   0   0   2   1   1  15 6.73118      330
   1   1   1   3   1   0   0   2   1   1  16 6.17506      331
   1   1   1   3   1   0   0   2   1   1  17 6.81882      332
   1   1   1   3   1   0   0   2   1   1  20 6.38645      333
   1   1   1   3   1   0   0   2   1   1  26 6.26863      334
   1   1   1   3   1   0   0   2   1   1  27 5.83683      335
   1   1   1   3   1   0   0   2   2   1   8 6.89957      336
   1   1   1   3   1   0   0   2   2   1   9 6.36810      337
   1   1   1   3   1   0   0   2   2   1  10 6.27442      338
   1   1   1   3   1   0   0   2   2   1  11 6.19873      339
   1   1   1   3   1   0   0   2   2   1  12 6.56947      340
   1   1   1   3   1   0   0   2   2   1  15 6.73118      341
   1   1   1   3   1   0   0   2   2   1  16 6.17506      342
   1   1   1   3   1   0   0   2   2   1  17 6.81881      343
   1   1   1   3   1   0   0   2   2   1  20 6.42880      344
   1   1   1   3   1   0   1   2   1   1  24 6.79203      345
   1   1   1   3   1   0   1   2   2   1  24 6.79202      346
   1   1   1   3   1   0   1   3   1   1   2 3.70222      347
   1   1   1   3   1   0   1   3   1   1   3 3.65611      348
   1   1   1   3   1   0   1   3   1   1   4 4.30774      349
   1   1   1   3   1   0   1   3   1   1   5 4.88499      350
   1   1   1   3   1   0   1   3   1   1   6 4.92828      351
   1   1   1   3   1   0   1   3   1   1   7 4.40687      352
   1   1   1   3   1   0   1   3   1   1   8 3.71604      353
   1   1   1   3   1   0   1   3   1   1   9 3.82988      354
   1   1   1   3   1   0   1   3   1   1  10 3.87452      355
   1   1   1   3   1   0   1   3   1   1  11 4.68855      356
   1   1   1   3   1   0   1   3   1   1  12 5.29146      357
   1   1   1   3   1   0   1   3   1   1  13 5.24235      358
   1   1   1   3   1   0   1   3   1   1  14 4.58284      359
   1   1   1   3   1   0   1   3   1   1  15 3.81968      360
   1   1   1   3   1   0   1   3   1   1  16 5.16478      361
   1   1   1   3   1   0   1   3   1   1  17 6.12008      362
   1   1   1   3   1   0   1   3   1   1  18 6.03810      363
   1   1   1   3   1   0   1   3   1   1  19 4.99284      364
   1   1   1   3   1   0   1   3   1   1  20 4.75910      365
   1   1   1   3   1   0   1   3   1   1  21 4.57367      366
   1   1   1   3   1   0   1   3   1   1  22 4.74817      367
   1   1   1   3   1   0   1   3   1   1  23 5.64625      368
   1   1   1   3   1   0   1   3   1   1  24 5.71954      369
   1   1   1   3   1   0   1   3   1   1  25 4.90586      370
   1   1   1   3   1   0   1   3   1   1  26 5.17931      371
   1   1   1   3   1   0   1   3   1   1  27 5.62680      372
   1   1   1   3   1   0   1   3   1   1  28 4.43637      373
   1   1   1   3   1   0   1   3   2   1   2 3.70220      374
   1   1   1   3   1   0   1   3   2   1   3 3.65610      375
   1   1   1   3   1   0   1   3   2   1   4 4.30773      376
   1   1   1   3   1   0   1   3   2   1   5 4.88499      377
   1   1   1   3   1   0   1   3   2   1   6 4.92828      378
   1   1   1   3   1   0   1   3   2   1   7 4.40688      379
   1   1   1   3   1   0   1   3   2   1   8 3.71604      380
   1   1   1   3   1   0   1   3   2   1   9 3.82989      381
   1   1   1   3   1   0   1   3   2   1  10 3.87452      382
   1   1   1   3   1   0   1   3   2   1  11 4.68855      383
   1   1   1   3   1   0   1   3   2   1  12 5.29145      384
   1   1   1   3   1   0   1   3   2   1  13 5.24233      385
   1   1   1   3   1   0   1   3   2   1  14 4.58283      386
   1   1   1   3   1   0   1   3   2   1  15 3.81967      387
   1   1   1   3   1   0   1   3   2   1  16 5.16478      388
   1   1   1   3   1   0   1   3   2   1  17 6.12007      389
   1   1   1   3   1   0   1   3   2   1  18 6.03808      390
   1   1   1   3   1   0   1   3   2   1  19 4.99282      391
   1   1   1   3   1   0   1   3   2   1  20 4.79121      392
   1   1   1   3   1   0   1   3   2   1  21 4.50168      393
   1   1   1   3   1   0   1   3   2   1  22 4.74816      394
   1   1   1   3   1   0   1   3   2   1  23 5.64625      395
   1   1   1   3   1   0   1   3   2   1  24 5.71955      396
   1   1   1   3   1   0   1   3   2   1  25 4.90587      397
   1   1   1   3   1   0   1   3   2   1  26 4.38477      398
   1   1   1   3   1   0   1   3   2   1  27 5.32543      399
   1   1   1   3   1   0   1   3   2   1  28 4.40523      400
   1   1   1   3   1   0   1   4   1   1  11 6.53823      401
   1   1   1   3   1   0   1   4   1   1  12 6.17294      402
   1   1   1   3   1   0   1   4   1   1  16 6.06778      403
   1   1   1   3   1   0   1   4   1   1  17 5.33787      404
   1   1   1   3   1   0   1   4   2   1  11 6.53823      405
   1   1   1   3   1   0   1   4   2   1  12 6.17294      406
   1   1   1   3   1   0   1   4   2   1  16 6.06778      407
   1   1   1   3   1   0   1   4   2   1  17 5.33788      408
   1   1   1   3   2  -1   0   2   2   1  27 6.87550      409
   1   1   1   3   2   0   1   3   1   1   2 6.93803      410
   1   1   1   3   2   0   1   3   1   1   3 6.66434      411
   1   1   1   3   2   0   1   3   1   1   4 5.44078      412
   1   1   1   3   2   0   1   3   1   1   5 5.67353      413
   1   1   1   3   2   0   1   3   1   1  21 5.88859      414
   1   1   1   3   2   0   1   3   1   1  22 4.51082      415
   1   1   1   3   2   0   1   3   1   1  23 4.99759      416
   1   1   1   3   2   0   1   3   2   1   2 6.93803      417
   1   1   1   3   2   0   1   3   2   1   3 6.66433      418
   1   1   1   3   2   0   1   3   2   1   4 5.44078      419
   1   1   1   3   2   0   1   3   2   1   5 5.67353      420
   1   1   1   3   2   0   1   3   2   1  21 5.91574      421
   1   1   1   3   2   0   1   3   2   1  22 4.51082      422
   1   1   1   3   2   0   1   3   2   1  23 4.99760      423
   1   1   1   3   2   0   1   3   2   1  26 5.02170      424
   1   1   1   3   2   0   1   3   2   1  27 6.02623      425
   1   1   1   3   2   0   1   3   2   1  28 6.24758      426
   1   1   1   4   0   0   0   4   1   1   5 5.96996      427
   1   1   1   4   0   0   0   4   1   1   6 5.36861      428
   1   1   1   4   0   0   0   4   1   1   7 6.19673      429
   1   1   1   4   0   0   0   4   1   1  23 5.66042      430
   1   1   1   4   0   0   0   4   1   1  24 4.47452      431
   1   1   1   4   0   0   0   4   1   1  25 6.08638      432
   1   1   1   4   0   0   0   4   2   1   5 5.96996      433
   1   1   1   4   0   0   0   4   2   1   6 5.36861      434
   1   1   1   4   0   0   0   4   2   1   7 6.19673      435
   1   1   1   4   0   0   0   4   2   1  23 5.66042      436
   1   1   1   4   0   0   0   4   2   1  24 4.47452      437
   1   1   1   4   0   0   0   4   2   1  25 6.08638      438
   1   1   1   4   0   0   1   4   1   1   2 6.31061      439
   1   1   1   4   0   0   1   4   1   1   3 6.78094      440
   1   1   1   4   0   0   1   4   1   1  10 6.79943      441
   1   1   1   4   0   0   1   4   1   1  13 6.77450      442
   1   1   1   4   0   0   1   4   1   1  14 6.32411      443
   1   1   1   4   0   0   1   4   1   1  15 6.31869      444
   1   1   1   4   0   0   1   4   1   1  19 6.28259      445
   1   1   1   4   0   0   1   4   1   1  21 6.31496      446
   1   1   1   4   0   0   1   4   2   1   2 6.31061      447
   1   1   1   4   0   0   1   4   2   1   3 6.78094      448
   1   1   1   4   0   0   1   4   2   1  10 6.79944      449
   1   1   1   4   0   0   1   4   2   1  13 6.77451      450
   1   1   1   4   0   0   1   4   2   1  14 6.32411      451
   1   1   1   4   0   0   1   4   2   1  15 6.31869      452
   1   1   1   4   0   0   1   4   2   1  19 6.28259      453
   1   1   1   4   0   0   1   4   2   1  21 6.33401      454
   1   1   1   4   0   0   1   4   2   1  27 5.57883      455
   1   1   1   4   0   0   1   4   2   1  28 6.89573      456
   1   1   1   4   0   1   1   4   1   1  19 6.31821      457
   1   1   1   4   0   1   1   4   2   1  19 6.31821      458
   1   1   1   4   0   1   1   4   2   1  27 6.99037      459
   1   1   1   4   0   1   1   4   2   1  28 6.45371      460
   1   1   1   4   1  -1   0   2   1   1   2 6.79699      461
   1   1   1   4   1  -1   0   2   1   1  10 6.67178      462
   1   1   1   4   1  -1   0   2   1   1  11 6.21677      463
   1   1   1   4   1  -1   0   2   1   1  12 4.95839      464
   1   1   1   4   1  -1   0   2   1   1  13 3.91718      465
   1   1   1   4   1  -1   0   2   1   1  14 4.49597      466
   1   1   1   4   1  -1   0   2   1   1  15 5.90151      467
   1   1   1   4   1  -1   0   2   1   1  17 4.96789      468
   1   1   1   4   1  -1   0   2   1   1  18 2.89749      469
   1   1   1   4   1  -1   0   2   1   1  19 4.13634      470
   1   1   1   4   1  -1   0   2   1   1  21 6.51943      471
   1   1   1   4   1  -1   0   2   2   1   2 6.79699      472
   1   1   1   4   1  -1   0   2   2   1  10 6.67179      473
   1   1   1   4   1  -1   0   2   2   1  11 6.21678      474
   1   1   1   4   1  -1   0   2   2   1  12 4.95840      475
   1   1   1   4   1  -1   0   2   2   1  13 3.91718      476
   1   1   1   4   1  -1   0   2   2   1  14 4.49597      477
   1   1   1   4   1  -1   0   2   2   1  15 5.90152      478
   1   1   1   4   1  -1   0   2   2   1  17 4.96790      479
   1   1   1   4   1  -1   0   2   2   1  18 2.89749      480
   1   1   1   4   1  -1   0   2   2   1  19 4.13634      481
   1   1   1   4   1  -1   0   2   2   1  21 6.53264      482
   1   1   1   4   1  -1   0   2   2   1  27 6.51135      483
   1   1   1   4   1  -1   0   2   2   1  28 5.86265      484
   1   1   1   4   1  -1   1   3   1   1   6 6.95334      485
   1   1   1   4   1  -1   1   3   1   1   7 6.27211      486
   1   1   1   4   1  -1   1   3   1   1   8 6.96956      487
   1   1   1   4   1  -1   1   3   1   1   9 6.74565      488
   1   1   1   4   1  -1   1   3   1   1  20 5.57141      489
   1   1   1   4   1  -1   1   3   1   1  24 6.72483      490
   1   1   1   4   1  -1   1   3   1   1  25 5.39864      491
   1   1   1   4   1  -1   1   3   1   1  26 5.83260      492
   1   1   1   4   1  -1   1   3   1   1  27 4.60760      493
   1   1   1   4   1  -1   1   3   1   1  28 5.70623      494
   1   1   1   4   1  -1   1   3   2   1   6 6.95334      495
   1   1   1   4   1  -1   1   3   2   1   7 6.27211      496
   1   1   1   4   1  -1   1   3   2   1   8 6.96956      497
   1   1   1   4   1  -1   1   3   2   1   9 6.74565      498
   1   1   1   4   1  -1   1   3   2   1  20 5.53261      499
   1   1   1   4   1  -1   1   3   2   1  24 6.72482      500
   1   1   1   4   1  -1   1   3   2   1  25 5.39863      501
   1   1   1   4   1   0   0   1   1   1   7 6.43017      502
   1   1   1   4   1   0   0   1   1   1   8 5.98908      503
   1   1   1   4   1   0   0   1   1   1   9 4.88992      504
   1   1   1   4   1   0   0   1   1   1  10 4.98798      505
   1   1   1   4   1   0   0   1   1   1  11 4.36276      506
   1   1   1   4   1   0   0   1   1   1  12 5.09674      507
   1   1   1   4   1   0   0   1   1   1  13 6.23960      508
   1   1   1   4   1   0   0   1   1   1  14 6.70004      509
   1   1   1   4   1   0   0   1   1   1  15 6.17305      510
   1   1   1   4   1   0   0   1   1   1  16 3.63483      511
   1   1   1   4   1   0   0   1   1   1  17 5.06337      512
   1   1   1   4   1   0   0   1   1   1  18 6.95679      513
   1   1   1   4   1   0   0   1   1   1  20 4.01743      514
   1   1   1   4   1   0   0   1   1   1  25 5.97883      515
   1   1   1   4   1   0   0   1   1   1  26 3.42772      516
   1   1   1   4   1   0   0   1   1   1  27 4.82841      517
   1   1   1   4   1   0   0   1   1   1  28 3.75185      518
   1   1   1   4   1   0   0   1   2   1   7 6.43017      519
   1   1   1   4   1   0   0   1   2   1   8 5.98908      520
   1   1   1   4   1   0   0   1   2   1   9 4.88992      521
   1   1   1   4   1   0   0   1   2   1  10 4.98798      522
   1   1   1   4   1   0   0   1   2   1  11 4.36276      523
   1   1   1   4   1   0   0   1   2   1  12 5.09674      524
   1   1   1   4   1   0   0   1   2   1  13 6.23960      525
   1   1   1   4   1   0   0   1   2   1  14 6.70004      526
   1   1   1   4   1   0   0   1   2   1  15 6.17305      527
   1   1   1   4   1   0   0   1   2   1  16 3.63483      528
   1   1   1   4   1   0   0   1   2   1  17 5.06337      529
   1   1   1   4   1   0   0   1   2   1  18 6.95679      530
   1   1   1   4   1   0   0   1   2   1  20 3.97458      531
   1   1   1   4   1   0   0   1   2   1  25 5.97883      532
   1   1   1   4   1   0   0   2   1   1   9 6.93454      533
   1   1   1   4   1   0   0   2   1   1  10 6.70106      534
   1   1   1   4   1   0   0   2   1   1  11 6.31505      535
   1   1   1   4   1   0   0   2   1   1  12 6.53884      536
   1   1   1   4   1   0   0   2   1   1  16 6.16240      537
   1   1   1   4   1   0   0   2   1   1  17 6.55948      538
   1   1   1   4   1   0   0   2   1   1  20 6.77999      539
   1   1   1   4   1   0   0   2   1   1  26 6.44881      540
   1   1   1   4   1   0   0   2   1   1  27 6.31930      541
   1   1   1   4   1   0   0   2   2   1   9 6.93455      542
   1   1   1   4   1   0   0   2   2   1  10 6.70106      543
   1   1   1   4   1   0   0   2   2   1  11 6.31505      544
   1   1   1   4   1   0   0   2   2   1  12 6.53884      545
   1   1   1   4   1   0   0   2   2   1  16 6.16240      546
   1   1   1   4   1   0   0   2   2   1  17 6.55947      547
   1   1   1   4   1   0   0   2   2   1  20 6.81430      548
   1   1   1   4   1   0   1   2   1   1  24 6.97408      549
   1   1   1   4   1   0   1   2   1   1  25 6.80361      550
   1   1   1   4   1   0   1   2   2   1  24 6.97407      551
   1   1   1   4   1   0   1   2   2   1  25 6.80361      552
   1   1   1   4   1   0   1   3   1   1   2 4.09495      553
   1   1   1   4   1   0   1   3   1   1   3 4.30774      554
   1   1   1   4   1   0   1   3   1   1   4 5.27052      555
   1   1   1   4   1   0   1   3   1   1   5 5.92277      556
   1   1   1   4   1   0   1   3   1   1   6 5.79467      557
   1   1   1   4   1   0   1   3   1   1   7 4.98411      558
   1   1   1   4   1   0   1   3   1   1   8 4.12541      559
   1   1   1   4   1   0   1   3   1   1   9 3.72702      560
   1   1   1   4   1   0   1   3   1   1  10 3.48650      561
   1   1   1   4   1   0   1   3   1   1  11 3.87842      562
   1   1   1   4   1   0   1   3   1   1  12 4.37312      563
   1   1   1   4   1   0   1   3   1   1  13 4.53180      564
   1   1   1   4   1   0   1   3   1   1  14 4.23156      565
   1   1   1   4   1   0   1   3   1   1  15 3.69466      566
   1   1   1   4   1   0   1   3   1   1  16 4.26410      567
   1   1   1   4   1   0   1   3   1   1  17 5.05086      568
   1   1   1   4   1   0   1   3   1   1  18 5.28389      569
   1   1   1   4   1   0   1   3   1   1  19 4.82412      570
   1   1   1   4   1   0   1   3   1   1  20 4.42839      571
   1   1   1   4   1   0   1   3   1   1  21 5.12976      572
   1   1   1   4   1   0   1   3   1   1  22 5.76891      573
   1   1   1   4   1   0   1   3   1   1  23 6.79425      574
   1   1   1   4   1   0   1   3   1   1  24 6.60319      575
   1   1   1   4   1   0   1   3   1   1  25 5.29808      576
   1   1   1   4   1   0   1   3   1   1  26 4.57046      577
   1   1   1   4   1   0   1   3   1   1  27 5.42180      578
   1   1   1   4   1   0   1   3   1   1  28 4.20376      579
   1   1   1   4   1   0   1   3   2   1   2 4.09494      580
   1   1   1   4   1   0   1   3   2   1   3 4.30774      581
   1   1   1   4   1   0   1   3   2   1   4 5.27052      582
   1   1   1   4   1   0   1   3   2   1   5 5.92277      583
   1   1   1   4   1   0   1   3   2   1   6 5.79467      584
   1   1   1   4   1   0   1   3   2   1   7 4.98411      585
   1   1   1   4   1   0   1   3   2   1   8 4.12541      586
   1   1   1   4   1   0   1   3   2   1   9 3.72702      587
   1   1   1   4   1   0   1   3   2   1  10 3.48650      588
   1   1   1   4   1   0   1   3   2   1  11 3.87842      589
   1   1   1   4   1   0   1   3   2   1  12 4.37312      590
   1   1   1   4   1   0   1   3   2   1  13 4.53178      591
   1   1   1   4   1   0   1   3   2   1  14 4.23155      592
   1   1   1   4   1   0   1   3   2   1  15 3.69465      593
   1   1   1   4   1   0   1   3   2   1  16 4.26410      594
   1   1   1   4   1   0   1   3   2   1  17 5.05086      595
   1   1   1   4   1   0   1   3   2   1  18 5.28388      596
   1   1   1   4   1   0   1   3   2   1  19 4.82411      597
   1   1   1   4   1   0   1   3   2   1  20 4.45468      598
   1   1   1   4   1   0   1   3   2   1  21 5.05851      599
   1   1   1   4   1   0   1   3   2   1  22 5.76890      600
   1   1   1   4   1   0   1   3   2   1  23 6.79425      601
   1   1   1   4   1   0   1   3   2   1  24 6.60319      602
   1   1   1   4   1   0   1   3   2   1  25 5.29808      603
   1   1   1   4   1   0   1   3   2   1  26 5.20042      604
   1   1   1   4   1   0   1   3   2   1  27 5.80475      605
   1   1   1   4   1   0   1   3   2   1  28 4.86783      606
   1   1   1   4   1   0   1   4   1   1  10 6.53281      607
   1   1   1   4   1   0   1   4   1   1  11 5.33833      608
   1   1   1   4   1   0   1   4   1   1  12 5.07066      609
   1   1   1   4   1   0   1   4   1   1  13 6.04611      610
   1   1   1   4   1   0   1   4   1   1  16 4.91722      611
   1   1   1   4   1   0   1   4   1   1  17 4.37805      612
   1   1   1   4   1   0   1   4   1   1  18 6.19250      613
   1   1   1   4   1   0   1   4   1   1  20 6.81279      614
   1   1   1   4   1   0   1   4   1   1  26 5.95891      615
   1   1   1   4   1   0   1   4   1   1  27 6.90135      616
   1   1   1   4   1   0   1   4   2   1  10 6.53280      617
   1   1   1   4   1   0   1   4   2   1  11 5.33834      618
   1   1   1   4   1   0   1   4   2   1  12 5.07067      619
   1   1   1   4   1   0   1   4   2   1  13 6.04611      620
   1   1   1   4   1   0   1   4   2   1  16 4.91723      621
   1   1   1   4   1   0   1   4   2   1  17 4.37806      622
   1   1   1   4   1   0   1   4   2   1  18 6.19250      623
   1   1   1   4   1   0   1   4   2   1  20 6.82927      624
   1   1   1   4   1   1   1   4   1   1  18 6.22403      625
   1   1   1   4   1   1   1   4   2   1  18 6.22402      626
   1   1   1   4   2  -1   0   2   1   1  21 6.82639      627
   1   1   1   4   2  -1   0   2   2   1  21 6.90984      628
   1   1   1   4   2  -1   0   2   2   1  27 6.37906      629
   1   1   1   4   2  -1   0   2   2   1  28 6.65856      630
   1   1   1   4   2  -1   1   3   1   1  24 6.93634      631
   1   1   1   4   2  -1   1   3   2   1  24 6.93634      632
   1   1   1   4   2   0   1   2   1   1  23 6.93763      633
   1   1   1   4   2   0   1   2   1   1  24 6.41770      634
   1   1   1   4   2   0   1   2   2   1  23 6.93763      635
   1   1   1   4   2   0   1   2   2   1  24 6.41770      636
   1   1   1   4   2   0   1   3   1   1   2 5.58550      637
   1   1   1   4   2   0   1   3   1   1   3 5.44078      638
   1   1   1   4   2   0   1   3   1   1   4 4.33857      639
   1   1   1   4   2   0   1   3   1   1   5 4.83779      640
   1   1   1   4   2   0   1   3   1   1   6 6.23111      641
   1   1   1   4   2   0   1   3   1   1   8 6.74035      642
   1   1   1   4   2   0   1   3   1   1  15 6.92761      643
   1   1   1   4   2   0   1   3   1   1  19 6.94616      644
   1   1   1   4   2   0   1   3   1   1  21 4.48005      645
   1   1   1   4   2   0   1   3   1   1  22 3.32896      646
   1   1   1   4   2   0   1   3   1   1  23 4.38827      647
   1   1   1   4   2   0   1   3   1   1  24 6.81847      648
   1   1   1   4   2   0   1   3   2   1   2 5.58550      649
   1   1   1   4   2   0   1   3   2   1   3 5.44078      650
   1   1   1   4   2   0   1   3   2   1   4 4.33857      651
   1   1   1   4   2   0   1   3   2   1   5 4.83780      652
   1   1   1   4   2   0   1   3   2   1   6 6.23112      653
   1   1   1   4   2   0   1   3   2   1   8 6.74035      654
   1   1   1   4   2   0   1   3   2   1  15 6.92761      655
   1   1   1   4   2   0   1   3   2   1  19 6.94615      656
   1   1   1   4   2   0   1   3   2   1  21 4.50762      657
   1   1   1   4   2   0   1   3   2   1  22 3.32895      658
   1   1   1   4   2   0   1   3   2   1  23 4.38828      659
   1   1   1   4   2   0   1   3   2   1  24 6.81849      660
   1   1   1   4   2   0   1   3   2   1  26 3.61039      661
   1   1   1   4   2   0   1   3   2   1  27 4.65291      662
   1   1   1   4   2   0   1   3   2   1  28 4.82920      663
   1   1   1   5   0   0   0   4   1   1   5 6.83361      664
   1   1   1   5   0   0   0   4   1   1   6 6.39266      665
   1   1   1   5   0   0   0   4   1   1  23 6.45014      666
   1   1   1   5   0   0   0   4   1   1  24 5.59884      667
   1   1   1   5   0   0   0   4   2   1   5 6.83361      668
   1   1   1   5   0   0   0   4   2   1   6 6.39266      669
   1   1   1   5   0   0   0   4   2   1  23 6.45015      670
   1   1   1   5   0   0   0   4   2   1  24 5.59885      671
   1   1   1   5   0   0   1   4   1   1   2 5.11840      672
   1   1   1   5   0   0   1   4   1   1   3 5.60423      673
   1   1   1   5   0   0   1   4   1   1   4 5.97000      674
   1   1   1   5   0   0   1   4   1   1   5 6.83366      675
   1   1   1   5   0   0   1   4   1   1   8 6.22213      676
   1   1   1   5   0   0   1   4   1   1   9 6.37646      677
   1   1   1   5   0   0   1   4   1   1  10 5.95574      678
   1   1   1   5   0   0   1   4   1   1  11 6.58535      679
   1   1   1   5   0   0   1   4   1   1  12 6.63045      680
   1   1   1   5   0   0   1   4   1   1  13 6.07458      681
   1   1   1   5   0   0   1   4   1   1  14 5.40240      682
   1   1   1   5   0   0   1   4   1   1  15 5.30881      683
   1   1   1   5   0   0   1   4   1   1  18 6.46504      684
   1   1   1   5   0   0   1   4   1   1  19 5.28442      685
   1   1   1   5   0   0   1   4   1   1  21 5.00809      686
   1   1   1   5   0   0   1   4   1   1  22 5.85467      687
   1   1   1   5   0   0   1   4   2   1   2 5.11840      688
   1   1   1   5   0   0   1   4   2   1   3 5.60423      689
   1   1   1   5   0   0   1   4   2   1   4 5.97000      690
   1   1   1   5   0   0   1   4   2   1   5 6.83365      691
   1   1   1   5   0   0   1   4   2   1   8 6.22214      692
   1   1   1   5   0   0   1   4   2   1   9 6.37647      693
   1   1   1   5   0   0   1   4   2   1  10 5.95576      694
   1   1   1   5   0   0   1   4   2   1  11 6.58537      695
   1   1   1   5   0   0   1   4   2   1  12 6.63047      696
   1   1   1   5   0   0   1   4   2   1  13 6.07459      697
   1   1   1   5   0   0   1   4   2   1  14 5.40241      698
   1   1   1   5   0   0   1   4   2   1  15 5.30881      699
   1   1   1   5   0   0   1   4   2   1  18 6.46505      700
   1   1   1   5   0   0   1   4   2   1  19 5.28442      701
   1   1   1   5   0   0   1   4   2   1  21 5.02935      702
   1   1   1   5   0   0   1   4   2   1  22 5.85466      703
   1   1   1   5   0   0   1   4   2   1  26 5.75194      704
   1   1   1   5   0   0   1   4   2   1  27 4.26396      705
   1   1   1   5   0   0   1   4   2   1  28 5.63323      706
   1   1   1   5   0   1   1   4   1   1  19 6.70973      707
   1   1   1   5   0   1   1   4   2   1  19 6.70973      708
   1   1   1   5   0   1   1   4   2   1  28 6.51760      709
   1   1   1   5   1  -1   0   2   1   1  10 6.91419      710
   1   1   1   5   1  -1   0   2   1   1  11 6.32541      711
   1   1   1   5   1  -1   0   2   1   1  12 5.01069      712
   1   1   1   5   1  -1   0   2   1   1  13 4.10725      713
   1   1   1   5   1  -1   0   2   1   1  14 4.85325      714
   1   1   1   5   1  -1   0   2   1   1  15 6.25317      715
   1   1   1   5   1  -1   0   2   1   1  17 4.87181      716
   1   1   1   5   1  -1   0   2   1   1  18 3.04065      717
   1   1   1   5   1  -1   0   2   1   1  19 4.60294      718
   1   1   1   5   1  -1   0   2   2   1  10 6.91419      719
   1   1   1   5   1  -1   0   2   2   1  11 6.32541      720
   1   1   1   5   1  -1   0   2   2   1  12 5.01069      721
   1   1   1   5   1  -1   0   2   2   1  13 4.10726      722
   1   1   1   5   1  -1   0   2   2   1  14 4.85325      723
   1   1   1   5   1  -1   0   2   2   1  15 6.25317      724
   1   1   1   5   1  -1   0   2   2   1  17 4.87182      725
   1   1   1   5   1  -1   0   2   2   1  18 3.04065      726
   1   1   1   5   1  -1   0   2   2   1  19 4.60294      727
   1   1   1   5   1  -1   0   2   2   1  27 6.91892      728
   1   1   1   5   1  -1   0   2   2   1  28 6.53608      729
   1   1   1   5   1  -1   1   3   1   1   6 6.68498      730
   1   1   1   5   1  -1   1   3   1   1   7 5.81941      731
   1   1   1   5   1  -1   1   3   1   1   8 6.26098      732
   1   1   1   5   1  -1   1   3   1   1   9 5.84990      733
   1   1   1   5   1  -1   1   3   1   1  10 6.77783      734
   1   1   1   5   1  -1   1   3   1   1  11 6.89867      735
   1   1   1   5   1  -1   1   3   1   1  16 6.25657      736
   1   1   1   5   1  -1   1   3   1   1  20 4.69017      737
   1   1   1   5   1  -1   1   3   1   1  24 6.67251      738
   1   1   1   5   1  -1   1   3   1   1  25 5.02231      739
   1   1   1   5   1  -1   1   3   1   1  26 4.82620      740
   1   1   1   5   1  -1   1   3   1   1  27 3.72270      741
   1   1   1   5   1  -1   1   3   1   1  28 5.03372      742
   1   1   1   5   1  -1   1   3   2   1   6 6.68498      743
   1   1   1   5   1  -1   1   3   2   1   7 5.81940      744
   1   1   1   5   1  -1   1   3   2   1   8 6.26098      745
   1   1   1   5   1  -1   1   3   2   1   9 5.84990      746
   1   1   1   5   1  -1   1   3   2   1  10 6.77783      747
   1   1   1   5   1  -1   1   3   2   1  11 6.89867      748
   1   1   1   5   1  -1   1   3   2   1  16 6.25657      749
   1   1   1   5   1  -1   1   3   2   1  20 4.65913      750
   1   1   1   5   1  -1   1   3   2   1  24 6.67250      751
   1   1   1   5   1  -1   1   3   2   1  25 5.02230      752
   1   1   1   5   1   0   0   1   1   1   7 6.05253      753
   1   1   1   5   1   0   0   1   1   1   8 5.92082      754
   1   1   1   5   1   0   0   1   1   1   9 5.00060      755
   1   1   1   5   1   0   0   1   1   1  10 5.46211      756
   1   1   1   5   1   0   0   1   1   1  11 5.10513      757
   1   1   1   5   1   0   0   1   1   1  12 6.06077      758
   1   1   1   5   1   0   0   1   1   1  15 6.71440      759
   1   1   1   5   1   0   0   1   1   1  16 4.33760      760
   1   1   1   5   1   0   0   1   1   1  17 6.15554      761
   1   1   1   5   1   0   0   1   1   1  20 3.87232      762
   1   1   1   5   1   0   0   1   1   1  25 5.42957      763
   1   1   1   5   1   0   0   1   1   1  26 3.50548      764
   1   1   1   5   1   0   0   1   1   1  27 4.52738      765
   1   1   1   5   1   0   0   1   1   1  28 3.33336      766
   1   1   1   5   1   0   0   1   2   1   7 6.05253      767
   1   1   1   5   1   0   0   1   2   1   8 5.92081      768
   1   1   1   5   1   0   0   1   2   1   9 5.00060      769
   1   1   1   5   1   0   0   1   2   1  10 5.46211      770
   1   1   1   5   1   0   0   1   2   1  11 5.10513      771
   1   1   1   5   1   0   0   1   2   1  12 6.06077      772
   1   1   1   5   1   0   0   1   2   1  15 6.71440      773
   1   1   1   5   1   0   0   1   2   1  16 4.33760      774
   1   1   1   5   1   0   0   1   2   1  17 6.15554      775
   1   1   1   5   1   0   0   1   2   1  20 3.80943      776
   1   1   1   5   1   0   0   1   2   1  25 5.42957      777
   1   1   1   5   1   0   1   2   1   1  24 6.81839      778
   1   1   1   5   1   0   1   2   1   1  25 6.38969      779
   1   1   1   5   1   0   1   2   1   1  28 6.81343      780
   1   1   1   5   1   0   1   2   2   1  24 6.81839      781
   1   1   1   5   1   0   1   2   2   1  25 6.38969      782
   1   1   1   5   1   0   1   3   1   1   2 4.26896      783
   1   1   1   5   1   0   1   3   1   1   3 4.88499      784
   1   1   1   5   1   0   1   3   1   1   4 5.92277      785
   1   1   1   5   1   0   1   3   1   1   5 6.79230      786
   1   1   1   5   1   0   1   3   1   1   6 6.82384      787
   1   1   1   5   1   0   1   3   1   1   7 6.00117      788
   1   1   1   5   1   0   1   3   1   1   8 4.92856      789
   1   1   1   5   1   0   1   3   1   1   9 4.38803      790
   1   1   1   5   1   0   1   3   1   1  10 3.69590      791
   1   1   1   5   1   0   1   3   1   1  11 3.80424      792
   1   1   1   5   1   0   1   3   1   1  12 3.85055      793
   1   1   1   5   1   0   1   3   1   1  13 3.78336      794
   1   1   1   5   1   0   1   3   1   1  14 3.67347      795
   1   1   1   5   1   0   1   3   1   1  15 3.62389      796
   1   1   1   5   1   0   1   3   1   1  16 4.36331      797
   1   1   1   5   1   0   1   3   1   1  17 4.44039      798
   1   1   1   5   1   0   1   3   1   1  18 4.32865      799
   1   1   1   5   1   0   1   3   1   1  19 4.16261      800
   1   1   1   5   1   0   1   3   1   1  20 5.21672      801
   1   1   1   5   1   0   1   3   1   1  21 5.03879      802
   1   1   1   5   1   0   1   3   1   1  22 6.25440      803
   1   1   1   5   1   0   1   3   1   1  25 6.38705      804
   1   1   1   5   1   0   1   3   1   1  26 5.17771      805
   1   1   1   5   1   0   1   3   1   1  27 6.21860      806
   1   1   1   5   1   0   1   3   1   1  28 5.20533      807
   1   1   1   5   1   0   1   3   2   1   2 4.26896      808
   1   1   1   5   1   0   1   3   2   1   3 4.88499      809
   1   1   1   5   1   0   1   3   2   1   4 5.92277      810
   1   1   1   5   1   0   1   3   2   1   5 6.79230      811
   1   1   1   5   1   0   1   3   2   1   6 6.82384      812
   1   1   1   5   1   0   1   3   2   1   7 6.00117      813
   1   1   1   5   1   0   1   3   2   1   8 4.92856      814
   1   1   1   5   1   0   1   3   2   1   9 4.38803      815
   1   1   1   5   1   0   1   3   2   1  10 3.69590      816
   1   1   1   5   1   0   1   3   2   1  11 3.80424      817
   1   1   1   5   1   0   1   3   2   1  12 3.85055      818
   1   1   1   5   1   0   1   3   2   1  13 3.78335      819
   1   1   1   5   1   0   1   3   2   1  14 3.67346      820
   1   1   1   5   1   0   1   3   2   1  15 3.62389      821
   1   1   1   5   1   0   1   3   2   1  16 4.36331      822
   1   1   1   5   1   0   1   3   2   1  17 4.44038      823
   1   1   1   5   1   0   1   3   2   1  18 4.32864      824
   1   1   1   5   1   0   1   3   2   1  19 4.16260      825
   1   1   1   5   1   0   1   3   2   1  20 5.25247      826
   1   1   1   5   1   0   1   3   2   1  21 4.98040      827
   1   1   1   5   1   0   1   3   2   1  22 6.25440      828
   1   1   1   5   1   0   1   3   2   1  25 6.38706      829
   1   1   1   5   1   0   1   3   2   1  26 5.26443      830
   1   1   1   5   1   0   1   3   2   1  27 5.66507      831
   1   1   1   5   1   0   1   3   2   1  28 4.57612      832
   1   1   1   5   1   0   1   4   1   1   9 6.12194      833
   1   1   1   5   1   0   1   4   1   1  10 5.40337      834
   1   1   1   5   1   0   1   4   1   1  11 4.11673      835
   1   1   1   5   1   0   1   4   1   1  12 3.87330      836
   1   1   1   5   1   0   1   4   1   1  13 4.98421      837
   1   1   1   5   1   0   1   4   1   1  14 6.04116      838
   1   1   1   5   1   0   1   4   1   1  15 6.24642      839
   1   1   1   5   1   0   1   4   1   1  16 3.66337      840
   1   1   1   5   1   0   1   4   1   1  17 3.15038      841
   1   1   1   5   1   0   1   4   1   1  18 5.22582      842
   1   1   1   5   1   0   1   4   1   1  19 6.93713      843
   1   1   1   5   1   0   1   4   1   1  20 5.76390      844
   1   1   1   5   1   0   1   4   1   1  26 4.86944      845
   1   1   1   5   1   0   1   4   1   1  27 6.00872      846
   1   1   1   5   1   0   1   4   1   1  28 6.60327      847
   1   1   1   5   1   0   1   4   2   1   9 6.12194      848
   1   1   1   5   1   0   1   4   2   1  10 5.40337      849
   1   1   1   5   1   0   1   4   2   1  11 4.11673      850
   1   1   1   5   1   0   1   4   2   1  12 3.87331      851
   1   1   1   5   1   0   1   4   2   1  13 4.98421      852
   1   1   1   5   1   0   1   4   2   1  14 6.04116      853
   1   1   1   5   1   0   1   4   2   1  15 6.24641      854
   1   1   1   5   1   0   1   4   2   1  16 3.66337      855
   1   1   1   5   1   0   1   4   2   1  17 3.15039      856
   1   1   1   5   1   0   1   4   2   1  18 5.22581      857
   1   1   1   5   1   0   1   4   2   1  19 6.93712      858
   1   1   1   5   1   0   1   4   2   1  20 5.78099      859
   1   1   1   5   1   1   1   4   1   1  18 6.65937      860
   1   1   1   5   1   1   1   4   2   1  18 6.65936      861
   1   1   1   5   2  -1   0   2   2   1  27 6.59140      862
   1   1   1   5   2  -1   1   2   1   1  23 6.70141      863
   1   1   1   5   2  -1   1   2   2   1  23 6.70139      864
   1   1   1   5   2  -1   1   3   1   1   5 6.85434      865
   1   1   1   5   2  -1   1   3   1   1   6 6.87152      866
   1   1   1   5   2  -1   1   3   1   1  23 6.66522      867
   1   1   1   5   2  -1   1   3   1   1  24 6.68521      868
   1   1   1   5   2  -1   1   3   2   1   5 6.85434      869
   1   1   1   5   2  -1   1   3   2   1   6 6.87153      870
   1   1   1   5   2  -1   1   3   2   1  23 6.66523      871
   1   1   1   5   2  -1   1   3   2   1  24 6.68522      872
   1   1   1   5   2   0   1   2   1   1   6 6.99809      873
   1   1   1   5   2   0   1   2   1   1  23 6.71009      874
   1   1   1   5   2   0   1   2   1   1  24 6.02659      875
   1   1   1   5   2   0   1   2   2   1   6 6.99809      876
   1   1   1   5   2   0   1   2   2   1  23 6.71009      877
   1   1   1   5   2   0   1   2   2   1  24 6.02659      878
   1   1   1   5   2   0   1   3   1   1   2 5.47115      879
   1   1   1   5   2   0   1   3   1   1   3 5.67353      880
   1   1   1   5   2   0   1   3   1   1   4 4.83779      881
   1   1   1   5   2   0   1   3   1   1   5 5.63388      882
   1   1   1   5   2   0   1   3   1   1  14 6.97428      883
   1   1   1   5   2   0   1   3   1   1  15 6.68985      884
   1   1   1   5   2   0   1   3   1   1  19 6.29163      885
   1   1   1   5   2   0   1   3   1   1  21 4.05291      886
   1   1   1   5   2   0   1   3   1   1  22 3.76821      887
   1   1   1   5   2   0   1   3   1   1  23 5.39141      888
   1   1   1   5   2   0   1   3   2   1   2 5.47115      889
   1   1   1   5   2   0   1   3   2   1   3 5.67353      890
   1   1   1   5   2   0   1   3   2   1   4 4.83780      891
   1   1   1   5   2   0   1   3   2   1   5 5.63389      892
   1   1   1   5   2   0   1   3   2   1  14 6.97427      893
   1   1   1   5   2   0   1   3   2   1  15 6.68985      894
   1   1   1   5   2   0   1   3   2   1  19 6.29162      895
   1   1   1   5   2   0   1   3   2   1  21 4.10058      896
   1   1   1   5   2   0   1   3   2   1  22 3.76822      897
   1   1   1   5   2   0   1   3   2   1  23 5.39142      898
   1   1   1   5   2   0   1   3   2   1  26 3.31436      899
   1   1   1   5   2   0   1   3   2   1  27 4.16266      900
   1   1   1   5   2   0   1   3   2   1  28 4.22452      901
   1   1   1   6  -1   0   0   1   1   1  23 6.29861      902
   1   1   1   6  -1   0   0   1   2   1  23 6.29862      903
   1   1   1   6   0  -1   0   1   2   1  26 6.72880      904
   1   1   1   6   0  -1   0   1   2   1  28 6.65028      905
   1   1   1   6   0  -1   0   2   1   1  17 6.84511      906
   1   1   1   6   0  -1   0   2   2   1  17 6.84511      907
   1   1   1   6   0   0   0   4   1   1   6 6.85762      908
   1   1   1   6   0   0   0   4   1   1  24 6.19013      909
   1   1   1   6   0   0   0   4   2   1   6 6.85762      910
   1   1   1   6   0   0   0   4   2   1  24 6.19013      911
   1   1   1   6   0   0   1   4   1   1   2 4.03589      912
   1   1   1   6   0   0   1   4   1   1   3 4.75231      913
   1   1   1   6   0   0   1   4   1   1   4 5.36864      914
   1   1   1   6   0   0   1   4   1   1   5 6.39269      915
   1   1   1   6   0   0   1   4   1   1   6 6.85765      916
   1   1   1   6   0   0   1   4   1   1   7 6.42369      917
   1   1   1   6   0   0   1   4   1   1   8 5.37908      918
   1   1   1   6   0   0   1   4   1   1   9 5.37562      919
   1   1   1   6   0   0   1   4   1   1  10 4.75728      920
   1   1   1   6   0   0   1   4   1   1  11 5.33726      921
   1   1   1   6   0   0   1   4   1   1  12 5.29863      922
   1   1   1   6   0   0   1   4   1   1  13 4.68209      923
   1   1   1   6   0   0   1   4   1   1  14 4.01715      924
   1   1   1   6   0   0   1   4   1   1  15 4.03291      925
   1   1   1   6   0   0   1   4   1   1  16 6.12544      926
   1   1   1   6   0   0   1   4   1   1  17 6.06126      927
   1   1   1   6   0   0   1   4   1   1  18 5.09600      928
   1   1   1   6   0   0   1   4   1   1  19 3.94557      929
   1   1   1   6   0   0   1   4   1   1  20 6.58029      930
   1   1   1   6   0   0   1   4   1   1  21 4.03900      931
   1   1   1   6   0   0   1   4   1   1  22 5.31206      932
   1   1   1   6   0   0   1   4   1   1  26 6.78570      933
   1   1   1   6   0   0   1   4   1   1  27 6.57506      934
   1   1   1   6   0   0   1   4   2   1   2 4.03589      935
   1   1   1   6   0   0   1   4   2   1   3 4.75231      936
   1   1   1   6   0   0   1   4   2   1   4 5.36864      937
   1   1   1   6   0   0   1   4   2   1   5 6.39269      938
   1   1   1   6   0   0   1   4   2   1   6 6.85766      939
   1   1   1   6   0   0   1   4   2   1   7 6.42369      940
   1   1   1   6   0   0   1   4   2   1   8 5.37909      941
   1   1   1   6   0   0   1   4   2   1   9 5.37563      942
   1   1   1   6   0   0   1   4   2   1  10 4.75730      943
   1   1   1   6   0   0   1   4   2   1  11 5.33727      944
   1   1   1   6   0   0   1   4   2   1  12 5.29864      945
   1   1   1   6   0   0   1   4   2   1  13 4.68211      946
   1   1   1   6   0   0   1   4   2   1  14 4.01716      947
   1   1   1   6   0   0   1   4   2   1  15 4.03292      948
   1   1   1   6   0   0   1   4   2   1  16 6.12546      949
   1   1   1   6   0   0   1   4   2   1  17 6.06128      950
   1   1   1   6   0   0   1   4   2   1  18 5.09602      951
   1   1   1   6   0   0   1   4   2   1  19 3.94557      952
   1   1   1   6   0   0   1   4   2   1  20 6.66119      953
   1   1   1   6   0   0   1   4   2   1  21 4.05281      954
   1   1   1   6   0   0   1   4   2   1  22 5.31205      955
   1   1   1   6   0   0   1   4   2   1  26 4.91618      956
   1   1   1   6   0   0   1   4   2   1  27 3.35328      957
   1   1   1   6   0   0   1   4   2   1  28 4.56766      958
   1   1   1   6   0   1   1   4   2   1  28 6.98044      959
   1   1   1   6   1  -1   0   2   1   1   2 6.89489      960
   1   1   1   6   1  -1   0   2   1   1  10 6.77630      961
   1   1   1   6   1  -1   0   2   1   1  11 6.33755      962
   1   1   1   6   1  -1   0   2   1   1  12 5.12519      963
   1   1   1   6   1  -1   0   2   1   1  13 4.13777      964
   1   1   1   6   1  -1   0   2   1   1  14 4.67714      965
   1   1   1   6   1  -1   0   2   1   1  15 6.02448      966
   1   1   1   6   1  -1   0   2   1   1  17 5.13942      967
   1   1   1   6   1  -1   0   2   1   1  18 3.21656      968
   1   1   1   6   1  -1   0   2   1   1  19 4.33795      969
   1   1   1   6   1  -1   0   2   1   1  21 6.62367      970
   1   1   1   6   1  -1   0   2   2   1   2 6.89489      971
   1   1   1   6   1  -1   0   2   2   1  10 6.77631      972
   1   1   1   6   1  -1   0   2   2   1  11 6.33755      973
   1   1   1   6   1  -1   0   2   2   1  12 5.12520      974
   1   1   1   6   1  -1   0   2   2   1  13 4.13778      975
   1   1   1   6   1  -1   0   2   2   1  14 4.67714      976
   1   1   1   6   1  -1   0   2   2   1  15 6.02448      977
   1   1   1   6   1  -1   0   2   2   1  17 5.13943      978
   1   1   1   6   1  -1   0   2   2   1  18 3.21657      979
   1   1   1   6   1  -1   0   2   2   1  19 4.33795      980
   1   1   1   6   1  -1   0   2   2   1  21 6.64642      981
   1   1   1   6   1  -1   0   2   2   1  27 6.33100      982
   1   1   1   6   1  -1   0   2   2   1  28 6.23404      983
   1   1   1   6   1  -1   1   3   1   1   3 6.28550      984
   1   1   1   6   1  -1   1   3   1   1   4 6.95334      985
   1   1   1   6   1  -1   1   3   1   1   5 6.68498      986
   1   1   1   6   1  -1   1   3   1   1   6 5.65004      987
   1   1   1   6   1  -1   1   3   1   1   7 4.80121      988
   1   1   1   6   1  -1   1   3   1   1   8 5.14962      989
   1   1   1   6   1  -1   1   3   1   1   9 4.84886      990
   1   1   1   6   1  -1   1   3   1   1  10 5.76827      991
   1   1   1   6   1  -1   1   3   1   1  11 6.06793      992
   1   1   1   6   1  -1   1   3   1   1  15 6.80889      993
   1   1   1   6   1  -1   1   3   1   1  16 5.60339      994
   1   1   1   6   1  -1   1   3   1   1  20 3.98304      995
   1   1   1   6   1  -1   1   3   1   1  24 5.76632      996
   1   1   1   6   1  -1   1   3   1   1  25 4.17543      997
   1   1   1   6   1  -1   1   3   1   1  26 4.27576      998
   1   1   1   6   1  -1   1   3   1   1  27 2.95398      999
   1   1   1   6   1  -1   1   3   1   1  28 4.47800     1000
   1   1   1   6   1  -1   1   3   2   1   3 6.28550     1001
   1   1   1   6   1  -1   1   3   2   1   4 6.95334     1002
   1   1   1   6   1  -1   1   3   2   1   5 6.68498     1003
   1   1   1   6   1  -1   1   3   2   1   6 5.65004     1004
   1   1   1   6   1  -1   1   3   2   1   7 4.80121     1005
   1   1   1   6   1  -1   1   3   2   1   8 5.14961     1006
   1   1   1   6   1  -1   1   3   2   1   9 4.84885     1007
   1   1   1   6   1  -1   1   3   2   1  10 5.76827     1008
   1   1   1   6   1  -1   1   3   2   1  11 6.06793     1009
   1   1   1   6   1  -1   1   3   2   1  15 6.80889     1010
   1   1   1   6   1  -1   1   3   2   1  16 5.60339     1011
   1   1   1   6   1  -1   1   3   2   1  20 3.97399     1012
   1   1   1   6   1  -1   1   3   2   1  24 5.76632     1013
   1   1   1   6   1  -1   1   3   2   1  25 4.17542     1014
   1   1   1   6   1   0   0   1   1   1   9 6.15732     1015
   1   1   1   6   1   0   0   1   1   1  10 6.68561     1016
   1   1   1   6   1   0   0   1   1   1  11 6.24747     1017
   1   1   1   6   1   0   0   1   1   1  16 5.36266     1018
   1   1   1   6   1   0   0   1   1   1  20 4.82955     1019
   1   1   1   6   1   0   0   1   1   1  25 6.28222     1020
   1   1   1   6   1   0   0   1   1   1  26 4.41533     1021
   1   1   1   6   1   0   0   1   1   1  27 5.27507     1022
   1   1   1   6   1   0   0   1   1   1  28 4.31205     1023
   1   1   1   6   1   0   0   1   2   1   9 6.15732     1024
   1   1   1   6   1   0   0   1   2   1  10 6.68561     1025
   1   1   1   6   1   0   0   1   2   1  11 6.24747     1026
   1   1   1   6   1   0   0   1   2   1  16 5.36266     1027
   1   1   1   6   1   0   0   1   2   1  20 4.75640     1028
   1   1   1   6   1   0   0   1   2   1  25 6.28222     1029
   1   1   1   6   1   0   1   2   1   1  24 6.47379     1030
   1   1   1   6   1   0   1   2   1   1  25 6.29560     1031
   1   1   1   6   1   0   1   2   2   1  24 6.47379     1032
   1   1   1   6   1   0   1   2   2   1  25 6.29559     1033
   1   1   1   6   1   0   1   3   1   1   2 4.09271     1034
   1   1   1   6   1   0   1   3   1   1   3 4.92828     1035
   1   1   1   6   1   0   1   3   1   1   4 5.79467     1036
   1   1   1   6   1   0   1   3   1   1   5 6.82384     1037
   1   1   1   6   1   0   1   3   1   1   7 6.50517     1038
   1   1   1   6   1   0   1   3   1   1   8 5.35970     1039
   1   1   1   6   1   0   1   3   1   1   9 5.06576     1040
   1   1   1   6   1   0   1   3   1   1  10 4.25567     1041
   1   1   1   6   1   0   1   3   1   1  11 4.56261     1042
   1   1   1   6   1   0   1   3   1   1  12 4.38302     1043
   1   1   1   6   1   0   1   3   1   1  13 3.84400     1044
   1   1   1   6   1   0   1   3   1   1  14 3.46749     1045
   1   1   1   6   1   0   1   3   1   1  15 3.68452     1046
   1   1   1   6   1   0   1   3   1   1  16 5.33000     1047
   1   1   1   6   1   0   1   3   1   1  17 5.05854     1048
   1   1   1   6   1   0   1   3   1   1  18 4.20720     1049
   1   1   1   6   1   0   1   3   1   1  19 3.58200     1050
   1   1   1   6   1   0   1   3   1   1  20 6.18048     1051
   1   1   1   6   1   0   1   3   1   1  21 4.37273     1052
   1   1   1   6   1   0   1   3   1   1  22 5.88140     1053
   1   1   1   6   1   0   1   3   1   1  26 6.23824     1054
   1   1   1   6   1   0   1   3   1   1  28 6.23913     1055
   1   1   1   6   1   0   1   3   2   1   2 4.09270     1056
   1   1   1   6   1   0   1   3   2   1   3 4.92828     1057
   1   1   1   6   1   0   1   3   2   1   4 5.79467     1058
   1   1   1   6   1   0   1   3   2   1   5 6.82384     1059
   1   1   1   6   1   0   1   3   2   1   7 6.50518     1060
   1   1   1   6   1   0   1   3   2   1   8 5.35971     1061
   1   1   1   6   1   0   1   3   2   1   9 5.06576     1062
   1   1   1   6   1   0   1   3   2   1  10 4.25567     1063
   1   1   1   6   1   0   1   3   2   1  11 4.56261     1064
   1   1   1   6   1   0   1   3   2   1  12 4.38302     1065
   1   1   1   6   1   0   1   3   2   1  13 3.84399     1066
   1   1   1   6   1   0   1   3   2   1  14 3.46748     1067
   1   1   1   6   1   0   1   3   2   1  15 3.68452     1068
   1   1   1   6   1   0   1   3   2   1  16 5.33000     1069
   1   1   1   6   1   0   1   3   2   1  17 5.05854     1070
   1   1   1   6   1   0   1   3   2   1  18 4.20719     1071
   1   1   1   6   1   0   1   3   2   1  19 3.58198     1072
   1   1   1   6   1   0   1   3   2   1  20 6.22821     1073
   1   1   1   6   1   0   1   3   2   1  21 4.33055     1074
   1   1   1   6   1   0   1   3   2   1  22 5.88140     1075
   1   1   1   6   1   0   1   3   2   1  26 4.54791     1076
   1   1   1   6   1   0   1   3   2   1  27 5.02053     1077
   1   1   1   6   1   0   1   3   2   1  28 3.72074     1078
   1   1   1   6   1   0   1   4   1   1   9 6.52992     1079
   1   1   1   6   1   0   1   4   1   1  10 5.76895     1080
   1   1   1   6   1   0   1   4   1   1  11 4.35780     1081
   1   1   1   6   1   0   1   4   1   1  12 4.00482     1082
   1   1   1   6   1   0   1   4   1   1  13 5.17566     1083
   1   1   1   6   1   0   1   4   1   1  14 6.35379     1084
   1   1   1   6   1   0   1   4   1   1  15 6.63492     1085
   1   1   1   6   1   0   1   4   1   1  16 3.83643     1086
   1   1   1   6   1   0   1   4   1   1  17 3.07287     1087
   1   1   1   6   1   0   1   4   1   1  18 5.32965     1088
   1   1   1   6   1   0   1   4   1   1  20 6.11094     1089
   1   1   1   6   1   0   1   4   1   1  26 5.13923     1090
   1   1   1   6   1   0   1   4   1   1  27 6.53136     1091
   1   1   1   6   1   0   1   4   1   1  28 6.80227     1092
   1   1   1   6   1   0   1   4   2   1   9 6.52991     1093
   1   1   1   6   1   0   1   4   2   1  10 5.76895     1094
   1   1   1   6   1   0   1   4   2   1  11 4.35780     1095
   1   1   1   6   1   0   1   4   2   1  12 4.00482     1096
   1   1   1   6   1   0   1   4   2   1  13 5.17565     1097
   1   1   1   6   1   0   1   4   2   1  14 6.35379     1098
   1   1   1   6   1   0   1   4   2   1  15 6.63492     1099
   1   1   1   6   1   0   1   4   2   1  16 3.83642     1100
   1   1   1   6   1   0   1   4   2   1  17 3.07287     1101
   1   1   1   6   1   0   1   4   2   1  18 5.32964     1102
   1   1   1   6   1   0   1   4   2   1  20 6.11875     1103
   1   1   1   6   2  -1   1   2   1   1   5 6.99809     1104
   1   1   1   6   2  -1   1   2   1   1  22 6.97061     1105
   1   1   1   6   2  -1   1   2   1   1  23 6.20757     1106
   1   1   1   6   2  -1   1   2   2   1   5 6.99809     1107
   1   1   1   6   2  -1   1   2   2   1  22 6.97060     1108
   1   1   1   6   2  -1   1   2   2   1  23 6.20756     1109
   1   1   1   6   2  -1   1   3   1   1   5 6.87152     1110
   1   1   1   6   2  -1   1   3   1   1  23 6.56905     1111
   1   1   1   6   2  -1   1   3   2   1   5 6.87153     1112
   1   1   1   6   2  -1   1   3   2   1  23 6.56907     1113
   1   1   1   6   2   0   1   2   1   1  24 6.97587     1114
   1   1   1   6   2   0   1   2   2   1  24 6.97588     1115
   1   1   1   6   2   0   1   3   1   1   2 6.73671     1116
   1   1   1   6   2   0   1   3   1   1   4 6.23111     1117
   1   1   1   6   2   0   1   3   1   1  21 5.20393     1118
   1   1   1   6   2   0   1   3   1   1  22 5.15716     1119
   1   1   1   6   2   0   1   3   1   1  23 6.70161     1120
   1   1   1   6   2   0   1   3   2   1   2 6.73670     1121
   1   1   1   6   2   0   1   3   2   1   4 6.23112     1122
   1   1   1   6   2   0   1   3   2   1  21 5.26190     1123
   1   1   1   6   2   0   1   3   2   1  22 5.15716     1124
   1   1   1   6   2   0   1   3   2   1  23 6.70163     1125
   1   1   1   6   2   0   1   3   2   1  26 4.56922     1126
   1   1   1   6   2   0   1   3   2   1  27 5.23106     1127
   1   1   1   6   2   0   1   3   2   1  28 5.26053     1128
   1   1   1   7  -1   0   0   1   1   1   4 6.43017     1129
   1   1   1   7  -1   0   0   1   1   1   5 6.05253     1130
   1   1   1   7  -1   0   0   1   1   1  22 5.94076     1131
   1   1   1   7  -1   0   0   1   1   1  23 5.19819     1132
   1   1   1   7  -1   0   0   1   2   1   4 6.43017     1133
   1   1   1   7  -1   0   0   1   2   1   5 6.05253     1134
   1   1   1   7  -1   0   0   1   2   1  22 5.94076     1135
   1   1   1   7  -1   0   0   1   2   1  23 5.19819     1136
   1   1   1   7   0  -1   0   1   2   1  26 6.77326     1137
   1   1   1   7   0  -1   0   1   2   1  28 6.44223     1138
   1   1   1   7   0  -1   0   2   1   1  12 6.57983     1139
   1   1   1   7   0  -1   0   2   1   1  17 5.57914     1140
   1   1   1   7   0  -1   0   2   1   1  18 6.43626     1141
   1   1   1   7   0  -1   0   2   2   1  12 6.57983     1142
   1   1   1   7   0  -1   0   2   2   1  17 5.57914     1143
   1   1   1   7   0  -1   0   2   2   1  18 6.43626     1144
   1   1   1   7   0  -1   1   3   1   1  26 6.56344     1145
   1   1   1   7   0   0   0   4   1   1   6 6.42366     1146
   1   1   1   7   0   0   0   4   1   1   7 6.86155     1147
   1   1   1   7   0   0   0   4   1   1  24 5.83496     1148
   1   1   1   7   0   0   0   4   1   1  25 6.66200     1149
   1   1   1   7   0   0   0   4   2   1   6 6.42366     1150
   1   1   1   7   0   0   0   4   2   1   7 6.86155     1151
   1   1   1   7   0   0   0   4   2   1  24 5.83496     1152
   1   1   1   7   0   0   0   4   2   1  25 6.66199     1153
   1   1   1   7   0   0   1   3   1   1  17 6.96022     1154
   1   1   1   7   0   0   1   3   2   1  17 6.96022     1155
   1   1   1   7   0   0   1   4   1   1   2 4.47296     1156
   1   1   1   7   0   0   1   4   1   1   3 5.31895     1157
   1   1   1   7   0   0   1   4   1   1   4 6.19676     1158
   1   1   1   7   0   0   1   4   1   1   7 6.86157     1159
   1   1   1   7   0   0   1   4   1   1   8 5.71700     1160
   1   1   1   7   0   0   1   4   1   1   9 5.36825     1161
   1   1   1   7   0   0   1   4   1   1  10 4.54001     1162
   1   1   1   7   0   0   1   4   1   1  11 4.74834     1163
   1   1   1   7   0   0   1   4   1   1  12 4.50909     1164
   1   1   1   7   0   0   1   4   1   1  13 4.01086     1165
   1   1   1   7   0   0   1   4   1   1  14 3.74151     1166
   1   1   1   7   0   0   1   4   1   1  15 4.01768     1167
   1   1   1   7   0   0   1   4   1   1  16 5.48171     1168
   1   1   1   7   0   0   1   4   1   1  17 5.10384     1169
   1   1   1   7   0   0   1   4   1   1  18 4.31807     1170
   1   1   1   7   0   0   1   4   1   1  19 3.85418     1171
   1   1   1   7   0   0   1   4   1   1  20 6.40203     1172
   1   1   1   7   0   0   1   4   1   1  21 4.72667     1173
   1   1   1   7   0   0   1   4   1   1  22 6.26828     1174
   1   1   1   7   0   0   1   4   1   1  26 6.39961     1175
   1   1   1   7   0   0   1   4   1   1  27 6.45401     1176
   1   1   1   7   0   0   1   4   2   1   2 4.47296     1177
   1   1   1   7   0   0   1   4   2   1   3 5.31895     1178
   1   1   1   7   0   0   1   4   2   1   4 6.19675     1179
   1   1   1   7   0   0   1   4   2   1   7 6.86157     1180
   1   1   1   7   0   0   1   4   2   1   8 5.71701     1181
   1   1   1   7   0   0   1   4   2   1   9 5.36826     1182
   1   1   1   7   0   0   1   4   2   1  10 4.54002     1183
   1   1   1   7   0   0   1   4   2   1  11 4.74835     1184
   1   1   1   7   0   0   1   4   2   1  12 4.50911     1185
   1   1   1   7   0   0   1   4   2   1  13 4.01087     1186
   1   1   1   7   0   0   1   4   2   1  14 3.74152     1187
   1   1   1   7   0   0   1   4   2   1  15 4.01768     1188
   1   1   1   7   0   0   1   4   2   1  16 5.48173     1189
   1   1   1   7   0   0   1   4   2   1  17 5.10386     1190
   1   1   1   7   0   0   1   4   2   1  18 4.31808     1191
   1   1   1   7   0   0   1   4   2   1  19 3.85418     1192
   1   1   1   7   0   0   1   4   2   1  20 6.47942     1193
   1   1   1   7   0   0   1   4   2   1  21 4.73068     1194
   1   1   1   7   0   0   1   4   2   1  22 6.26827     1195
   1   1   1   7   0   0   1   4   2   1  26 5.70097     1196
   1   1   1   7   0   0   1   4   2   1  27 4.15259     1197
   1   1   1   7   0   0   1   4   2   1  28 5.08325     1198
   1   1   1   7   1  -1   0   2   1   1   2 6.06693     1199
   1   1   1   7   1  -1   0   2   1   1  10 6.39730     1200
   1   1   1   7   1  -1   0   2   1   1  11 6.25230     1201
   1   1   1   7   1  -1   0   2   1   1  12 5.19598     1202
   1   1   1   7   1  -1   0   2   1   1  13 3.99291     1203
   1   1   1   7   1  -1   0   2   1   1  14 4.12327     1204
   1   1   1   7   1  -1   0   2   1   1  15 5.42255     1205
   1   1   1   7   1  -1   0   2   1   1  17 5.48548     1206
   1   1   1   7   1  -1   0   2   1   1  18 3.26449     1207
   1   1   1   7   1  -1   0   2   1   1  19 3.53804     1208
   1   1   1   7   1  -1   0   2   1   1  21 5.55269     1209
   1   1   1   7   1  -1   0   2   2   1   2 6.06693     1210
   1   1   1   7   1  -1   0   2   2   1  10 6.39731     1211
   1   1   1   7   1  -1   0   2   2   1  11 6.25230     1212
   1   1   1   7   1  -1   0   2   2   1  12 5.19599     1213
   1   1   1   7   1  -1   0   2   2   1  13 3.99291     1214
   1   1   1   7   1  -1   0   2   2   1  14 4.12327     1215
   1   1   1   7   1  -1   0   2   2   1  15 5.42256     1216
   1   1   1   7   1  -1   0   2   2   1  17 5.48548     1217
   1   1   1   7   1  -1   0   2   2   1  18 3.26450     1218
   1   1   1   7   1  -1   0   2   2   1  19 3.53804     1219
   1   1   1   7   1  -1   0   2   2   1  21 5.58641     1220
   1   1   1   7   1  -1   0   2   2   1  26 6.47300     1221
   1   1   1   7   1  -1   0   2   2   1  27 5.20281     1222
   1   1   1   7   1  -1   0   2   2   1  28 5.18406     1223
   1   1   1   7   1  -1   1   3   1   1   2 6.76815     1224
   1   1   1   7   1  -1   1   3   1   1   3 5.86236     1225
   1   1   1   7   1  -1   1   3   1   1   4 6.27211     1226
   1   1   1   7   1  -1   1   3   1   1   5 5.81941     1227
   1   1   1   7   1  -1   1   3   1   1   6 4.80121     1228
   1   1   1   7   1  -1   1   3   1   1   7 4.23051     1229
   1   1   1   7   1  -1   1   3   1   1   8 4.83572     1230
   1   1   1   7   1  -1   1   3   1   1   9 4.91994     1231
   1   1   1   7   1  -1   1   3   1   1  10 5.98831     1232
   1   1   1   7   1  -1   1   3   1   1  11 6.58209     1233
   1   1   1   7   1  -1   1   3   1   1  15 6.85574     1234
   1   1   1   7   1  -1   1   3   1   1  16 6.28257     1235
   1   1   1   7   1  -1   1   3   1   1  20 4.34171     1236
   1   1   1   7   1  -1   1   3   1   1  23 6.48742     1237
   1   1   1   7   1  -1   1   3   1   1  24 4.78783     1238
   1   1   1   7   1  -1   1   3   1   1  25 3.70441     1239
   1   1   1   7   1  -1   1   3   1   1  26 4.90302     1240
   1   1   1   7   1  -1   1   3   1   1  27 3.32105     1241
   1   1   1   7   1  -1   1   3   1   1  28 4.69952     1242
   1   1   1   7   1  -1   1   3   2   1   2 6.76815     1243
   1   1   1   7   1  -1   1   3   2   1   3 5.86237     1244
   1   1   1   7   1  -1   1   3   2   1   4 6.27211     1245
   1   1   1   7   1  -1   1   3   2   1   5 5.81941     1246
   1   1   1   7   1  -1   1   3   2   1   6 4.80121     1247
   1   1   1   7   1  -1   1   3   2   1   7 4.23051     1248
   1   1   1   7   1  -1   1   3   2   1   8 4.83572     1249
   1   1   1   7   1  -1   1   3   2   1   9 4.91993     1250
   1   1   1   7   1  -1   1   3   2   1  10 5.98830     1251
   1   1   1   7   1  -1   1   3   2   1  11 6.58209     1252
   1   1   1   7   1  -1   1   3   2   1  15 6.85574     1253
   1   1   1   7   1  -1   1   3   2   1  16 6.28257     1254
   1   1   1   7   1  -1   1   3   2   1  20 4.34217     1255
   1   1   1   7   1  -1   1   3   2   1  23 6.48742     1256
   1   1   1   7   1  -1   1   3   2   1  24 4.78783     1257
   1   1   1   7   1  -1   1   3   2   1  25 3.70440     1258
   1   1   1   7   1   0   0   1   1   1  11 6.70220     1259
   1   1   1   7   1   0   0   1   1   1  16 5.75136     1260
   1   1   1   7   1   0   0   1   1   1  20 5.72114     1261
   1   1   1   7   1   0   0   1   1   1  26 5.11178     1262
   1   1   1   7   1   0   0   1   1   1  27 6.15757     1263
   1   1   1   7   1   0   0   1   1   1  28 5.38084     1264
   1   1   1   7   1   0   0   1   2   1  11 6.70220     1265
   1   1   1   7   1   0   0   1   2   1  16 5.75136     1266
   1   1   1   7   1   0   0   1   2   1  20 5.65281     1267
   1   1   1   7   1   0   1   2   1   1  24 6.28019     1268
   1   1   1   7   1   0   1   2   1   1  25 6.61661     1269
   1   1   1   7   1   0   1   2   2   1  24 6.28019     1270
   1   1   1   7   1   0   1   2   2   1  25 6.61661     1271
   1   1   1   7   1   0   1   3   1   1   2 3.71795     1272
   1   1   1   7   1   0   1   3   1   1   3 4.40688     1273
   1   1   1   7   1   0   1   3   1   1   4 4.98411     1274
   1   1   1   7   1   0   1   3   1   1   5 6.00117     1275
   1   1   1   7   1   0   1   3   1   1   6 6.50517     1276
   1   1   1   7   1   0   1   3   1   1   7 6.11846     1277
   1   1   1   7   1   0   1   3   1   1   8 5.08575     1278
   1   1   1   7   1   0   1   3   1   1   9 5.16033     1279
   1   1   1   7   1   0   1   3   1   1  10 4.57934     1280
   1   1   1   7   1   0   1   3   1   1  11 5.25303     1281
   1   1   1   7   1   0   1   3   1   1  12 5.26729     1282
   1   1   1   7   1   0   1   3   1   1  13 4.62097     1283
   1   1   1   7   1   0   1   3   1   1  14 3.86056     1284
   1   1   1   7   1   0   1   3   1   1  15 3.80641     1285
   1   1   1   7   1   0   1   3   1   1  16 6.06253     1286
   1   1   1   7   1   0   1   3   1   1  17 6.08835     1287
   1   1   1   7   1   0   1   3   1   1  18 5.07234     1288
   1   1   1   7   1   0   1   3   1   1  19 3.77468     1289
   1   1   1   7   1   0   1   3   1   1  20 6.43870     1290
   1   1   1   7   1   0   1   3   1   1  21 3.71841     1291
   1   1   1   7   1   0   1   3   1   1  22 4.93175     1292
   1   1   1   7   1   0   1   3   1   1  23 6.64218     1293
   1   1   1   7   1   0   1   3   1   1  25 6.83253     1294
   1   1   1   7   1   0   1   3   1   1  26 6.70417     1295
   1   1   1   7   1   0   1   3   1   1  28 6.42125     1296
   1   1   1   7   1   0   1   3   2   1   2 3.71794     1297
   1   1   1   7   1   0   1   3   2   1   3 4.40688     1298
   1   1   1   7   1   0   1   3   2   1   4 4.98411     1299
   1   1   1   7   1   0   1   3   2   1   5 6.00117     1300
   1   1   1   7   1   0   1   3   2   1   6 6.50518     1301
   1   1   1   7   1   0   1   3   2   1   7 6.11847     1302
   1   1   1   7   1   0   1   3   2   1   8 5.08575     1303
   1   1   1   7   1   0   1   3   2   1   9 5.16034     1304
   1   1   1   7   1   0   1   3   2   1  10 4.57934     1305
   1   1   1   7   1   0   1   3   2   1  11 5.25303     1306
   1   1   1   7   1   0   1   3   2   1  12 5.26729     1307
   1   1   1   7   1   0   1   3   2   1  13 4.62095     1308
   1   1   1   7   1   0   1   3   2   1  14 3.86055     1309
   1   1   1   7   1   0   1   3   2   1  15 3.80640     1310
   1   1   1   7   1   0   1   3   2   1  16 6.06254     1311
   1   1   1   7   1   0   1   3   2   1  17 6.08834     1312
   1   1   1   7   1   0   1   3   2   1  18 5.07232     1313
   1   1   1   7   1   0   1   3   2   1  19 3.77466     1314
   1   1   1   7   1   0   1   3   2   1  20 6.49040     1315
   1   1   1   7   1   0   1   3   2   1  21 3.67901     1316
   1   1   1   7   1   0   1   3   2   1  22 4.93174     1317
   1   1   1   7   1   0   1   3   2   1  23 6.64218     1318
   1   1   1   7   1   0   1   3   2   1  25 6.83253     1319
   1   1   1   7   1   0   1   3   2   1  26 3.61529     1320
   1   1   1   7   1   0   1   3   2   1  27 4.46756     1321
   1   1   1   7   1   0   1   3   2   1  28 3.09110     1322
   1   1   1   7   1   0   1   4   1   1  11 5.69705     1323
   1   1   1   7   1   0   1   4   1   1  12 5.26314     1324
   1   1   1   7   1   0   1   4   1   1  13 6.35279     1325
   1   1   1   7   1   0   1   4   1   1  16 5.16254     1326
   1   1   1   7   1   0   1   4   1   1  17 4.26127     1327
   1   1   1   7   1   0   1   4   1   1  18 6.36296     1328
   1   1   1   7   1   0   1   4   1   1  26 6.38173     1329
   1   1   1   7   1   0   1   4   2   1  11 5.69705     1330
   1   1   1   7   1   0   1   4   2   1  12 5.26314     1331
   1   1   1   7   1   0   1   4   2   1  13 6.35279     1332
   1   1   1   7   1   0   1   4   2   1  16 5.16254     1333
   1   1   1   7   1   0   1   4   2   1  17 4.26127     1334
   1   1   1   7   1   0   1   4   2   1  18 6.36295     1335
   1   1   1   7   2  -1   1   3   1   1  23 6.98505     1336
   1   1   1   7   2  -1   1   3   2   1  23 6.98506     1337
   1   1   1   7   2   0   1   3   1   1  21 6.41812     1338
   1   1   1   7   2   0   1   3   1   1  22 5.97772     1339
   1   1   1   7   2   0   1   3   2   1  21 6.47106     1340
   1   1   1   7   2   0   1   3   2   1  22 5.97772     1341
   1   1   1   7   2   0   1   3   2   1  26 5.71579     1342
   1   1   1   7   2   0   1   3   2   1  27 6.44383     1343
   1   1   1   7   2   0   1   3   2   1  28 6.54139     1344
   1   1   1   8  -1   0   0   1   1   1   4 5.98908     1345
   1   1   1   8  -1   0   0   1   1   1   5 5.92082     1346
   1   1   1   8  -1   0   0   1   1   1  21 6.97644     1347
   1   1   1   8  -1   0   0   1   1   1  22 5.32931     1348
   1   1   1   8  -1   0   0   1   1   1  23 5.20401     1349
   1   1   1   8  -1   0   0   1   2   1   4 5.98908     1350
   1   1   1   8  -1   0   0   1   2   1   5 5.92082     1351
   1   1   1   8  -1   0   0   1   2   1  22 5.32931     1352
   1   1   1   8  -1   0   0   1   2   1  23 5.20401     1353
   1   1   1   8  -1   0   0   1   2   1  26 6.48060     1354
   1   1   1   8  -1   0   0   1   2   1  27 6.75368     1355
   1   1   1   8  -1   0   0   4   1   1  23 6.42203     1356
   1   1   1   8  -1   0   0   4   2   1  23 6.42204     1357
   1   1   1   8   0  -1   0   1   2   1  28 6.81173     1358
   1   1   1   8   0  -1   0   2   1   1  12 6.26476     1359
   1   1   1   8   0  -1   0   2   1   1  13 6.62987     1360
   1   1   1   8   0  -1   0   2   1   1  17 5.35820     1361
   1   1   1   8   0  -1   0   2   1   1  18 6.08065     1362
   1   1   1   8   0  -1   0   2   2   1  12 6.26476     1363
   1   1   1   8   0  -1   0   2   2   1  13 6.62987     1364
   1   1   1   8   0  -1   0   2   2   1  17 5.35820     1365
   1   1   1   8   0  -1   0   2   2   1  18 6.08065     1366
   1   1   1   8   0   0   0   4   1   1   5 6.22210     1367
   1   1   1   8   0   0   0   4   1   1   6 5.37905     1368
   1   1   1   8   0   0   0   4   1   1   7 5.71699     1369
   1   1   1   8   0   0   0   4   1   1   8 6.82992     1370
   1   1   1   8   0   0   0   4   1   1  23 6.30159     1371
   1   1   1   8   0   0   0   4   1   1  24 4.74308     1372
   1   1   1   8   0   0   0   4   1   1  25 5.39901     1373
   1   1   1   8   0   0   0   4   1   1  28 6.32908     1374
   1   1   1   8   0   0   0   4   2   1   5 6.22210     1375
   1   1   1   8   0   0   0   4   2   1   6 5.37905     1376
   1   1   1   8   0   0   0   4   2   1   7 5.71698     1377
   1   1   1   8   0   0   0   4   2   1   8 6.82991     1378
   1   1   1   8   0   0   0   4   2   1  23 6.30159     1379
   1   1   1   8   0   0   0   4   2   1  24 4.74307     1380
   1   1   1   8   0   0   0   4   2   1  25 5.39901     1381
   1   1   1   8   0   0   1   3   1   1  16 6.95749     1382
   1   1   1   8   0   0   1   3   2   1  16 6.95750     1383
   1   1   1   8   0   0   1   4   1   1   2 5.83818     1384
   1   1   1   8   0   0   1   4   1   1   3 6.58770     1385
   1   1   1   8   0   0   1   4   1   1   8 6.82993     1386
   1   1   1   8   0   0   1   4   1   1   9 6.37739     1387
   1   1   1   8   0   0   1   4   1   1  10 5.61035     1388
   1   1   1   8   0   0   1   4   1   1  11 5.59140     1389
   1   1   1   8   0   0   1   4   1   1  12 5.30435     1390
   1   1   1   8   0   0   1   4   1   1  13 5.00306     1391
   1   1   1   8   0   0   1   4   1   1  14 4.99631     1392
   1   1   1   8   0   0   1   4   1   1  15 5.30307     1393
   1   1   1   8   0   0   1   4   1   1  16 6.15364     1394
   1   1   1   8   0   0   1   4   1   1  17 5.67653     1395
   1   1   1   8   0   0   1   4   1   1  18 5.18211     1396
   1   1   1   8   0   0   1   4   1   1  19 5.16317     1397
   1   1   1   8   0   0   1   4   1   1  21 6.14442     1398
   1   1   1   8   0   0   1   4   2   1   2 5.83817     1399
   1   1   1   8   0   0   1   4   2   1   3 6.58770     1400
   1   1   1   8   0   0   1   4   2   1   8 6.82993     1401
   1   1   1   8   0   0   1   4   2   1   9 6.37740     1402
   1   1   1   8   0   0   1   4   2   1  10 5.61036     1403
   1   1   1   8   0   0   1   4   2   1  11 5.59141     1404
   1   1   1   8   0   0   1   4   2   1  12 5.30437     1405
   1   1   1   8   0   0   1   4   2   1  13 5.00307     1406
   1   1   1   8   0   0   1   4   2   1  14 4.99631     1407
   1   1   1   8   0   0   1   4   2   1  15 5.30307     1408
   1   1   1   8   0   0   1   4   2   1  16 6.15366     1409
   1   1   1   8   0   0   1   4   2   1  17 5.67655     1410
   1   1   1   8   0   0   1   4   2   1  18 5.18212     1411
   1   1   1   8   0   0   1   4   2   1  19 5.16317     1412
   1   1   1   8   0   0   1   4   2   1  21 6.14936     1413
   1   1   1   8   0   0   1   4   2   1  27 5.54769     1414
   1   1   1   8   0   0   1   4   2   1  28 6.50005     1415
   1   1   1   8   0   1   1   4   1   1  18 6.65014     1416
   1   1   1   8   0   1   1   4   1   1  19 6.63971     1417
   1   1   1   8   0   1   1   4   2   1  18 6.65014     1418
   1   1   1   8   0   1   1   4   2   1  19 6.63971     1419
   1   1   1   8   1  -1   0   2   1   1   2 5.49975     1420
   1   1   1   8   1  -1   0   2   1   1   3 6.89956     1421
   1   1   1   8   1  -1   0   2   1   1  10 6.13006     1422
   1   1   1   8   1  -1   0   2   1   1  11 6.15554     1423
   1   1   1   8   1  -1   0   2   1   1  12 5.16821     1424
   1   1   1   8   1  -1   0   2   1   1  13 3.81001     1425
   1   1   1   8   1  -1   0   2   1   1  14 3.68152     1426
   1   1   1   8   1  -1   0   2   1   1  15 4.99398     1427
   1   1   1   8   1  -1   0   2   1   1  17 5.60652     1428
   1   1   1   8   1  -1   0   2   1   1  18 3.15672     1429
   1   1   1   8   1  -1   0   2   1   1  19 2.86890     1430
   1   1   1   8   1  -1   0   2   1   1  21 4.78920     1431
   1   1   1   8   1  -1   0   2   2   1   2 5.49975     1432
   1   1   1   8   1  -1   0   2   2   1   3 6.89956     1433
   1   1   1   8   1  -1   0   2   2   1  10 6.13006     1434
   1   1   1   8   1  -1   0   2   2   1  11 6.15554     1435
   1   1   1   8   1  -1   0   2   2   1  12 5.16822     1436
   1   1   1   8   1  -1   0   2   2   1  13 3.81002     1437
   1   1   1   8   1  -1   0   2   2   1  14 3.68153     1438
   1   1   1   8   1  -1   0   2   2   1  15 4.99398     1439
   1   1   1   8   1  -1   0   2   2   1  17 5.60653     1440
   1   1   1   8   1  -1   0   2   2   1  18 3.15673     1441
   1   1   1   8   1  -1   0   2   2   1  19 2.86891     1442
   1   1   1   8   1  -1   0   2   2   1  21 4.82589     1443
   1   1   1   8   1  -1   0   2   2   1  26 5.60167     1444
   1   1   1   8   1  -1   0   2   2   1  27 4.58834     1445
   1   1   1   8   1  -1   0   2   2   1  28 4.24026     1446
   1   1   1   8   1  -1   1   3   1   1   3 6.76856     1447
   1   1   1   8   1  -1   1   3   1   1   4 6.96956     1448
   1   1   1   8   1  -1   1   3   1   1   5 6.26098     1449
   1   1   1   8   1  -1   1   3   1   1   6 5.14962     1450
   1   1   1   8   1  -1   1   3   1   1   7 4.83572     1451
   1   1   1   8   1  -1   1   3   1   1   8 5.73848     1452
   1   1   1   8   1  -1   1   3   1   1   9 5.98937     1453
   1   1   1   8   1  -1   1   3   1   1  20 5.32461     1454
   1   1   1   8   1  -1   1   3   1   1  23 6.76634     1455
   1   1   1   8   1  -1   1   3   1   1  24 4.82856     1456
   1   1   1   8   1  -1   1   3   1   1  25 4.20737     1457
   1   1   1   8   1  -1   1   3   1   1  26 5.94842     1458
   1   1   1   8   1  -1   1   3   1   1  27 4.33363     1459
   1   1   1   8   1  -1   1   3   1   1  28 5.45081     1460
   1   1   1   8   1  -1   1   3   2   1   3 6.76856     1461
   1   1   1   8   1  -1   1   3   2   1   4 6.96956     1462
   1   1   1   8   1  -1   1   3   2   1   5 6.26098     1463
   1   1   1   8   1  -1   1   3   2   1   6 5.14961     1464
   1   1   1   8   1  -1   1   3   2   1   7 4.83572     1465
   1   1   1   8   1  -1   1   3   2   1   8 5.73848     1466
   1   1   1   8   1  -1   1   3   2   1   9 5.98936     1467
   1   1   1   8   1  -1   1   3   2   1  20 5.31196     1468
   1   1   1   8   1  -1   1   3   2   1  23 6.76634     1469
   1   1   1   8   1  -1   1   3   2   1  24 4.82856     1470
   1   1   1   8   1  -1   1   3   2   1  25 4.20736     1471
   1   1   1   8   1   0   0   1   1   1  11 6.18246     1472
   1   1   1   8   1   0   0   1   1   1  12 6.72513     1473
   1   1   1   8   1   0   0   1   1   1  16 5.26827     1474
   1   1   1   8   1   0   0   1   1   1  17 6.34749     1475
   1   1   1   8   1   0   0   1   1   1  20 5.87418     1476
   1   1   1   8   1   0   0   1   1   1  26 5.10509     1477
   1   1   1   8   1   0   0   1   1   1  27 6.43741     1478
   1   1   1   8   1   0   0   1   1   1  28 5.70993     1479
   1   1   1   8   1   0   0   1   2   1  11 6.18246     1480
   1   1   1   8   1   0   0   1   2   1  12 6.72513     1481
   1   1   1   8   1   0   0   1   2   1  16 5.26827     1482
   1   1   1   8   1   0   0   1   2   1  17 6.34749     1483
   1   1   1   8   1   0   0   1   2   1  20 5.81956     1484
   1   1   1   8   1   0   0   2   1   1  27 6.86649     1485
   1   1   1   8   1   0   1   2   1   1  24 6.43814     1486
   1   1   1   8   1   0   1   2   2   1  24 6.43813     1487
   1   1   1   8   1   0   1   3   1   1   2 3.49515     1488
   1   1   1   8   1   0   1   3   1   1   3 3.71604     1489
   1   1   1   8   1   0   1   3   1   1   4 4.12541     1490
   1   1   1   8   1   0   1   3   1   1   5 4.92856     1491
   1   1   1   8   1   0   1   3   1   1   6 5.35970     1492
   1   1   1   8   1   0   1   3   1   1   7 5.08575     1493
   1   1   1   8   1   0   1   3   1   1   8 4.28405     1494
   1   1   1   8   1   0   1   3   1   1   9 4.60848     1495
   1   1   1   8   1   0   1   3   1   1  10 4.42617     1496
   1   1   1   8   1   0   1   3   1   1  11 5.33937     1497
   1   1   1   8   1   0   1   3   1   1  12 5.70346     1498
   1   1   1   8   1   0   1   3   1   1  13 5.29162     1499
   1   1   1   8   1   0   1   3   1   1  14 4.41981     1500
   1   1   1   8   1   0   1   3   1   1  15 3.88201     1501
   1   1   1   8   1   0   1   3   1   1  16 6.02459     1502
   1   1   1   8   1   0   1   3   1   1  17 6.59653     1503
   1   1   1   8   1   0   1   3   1   1  18 5.95414     1504
   1   1   1   8   1   0   1   3   1   1  19 4.51290     1505
   1   1   1   8   1   0   1   3   1   1  20 5.82238     1506
   1   1   1   8   1   0   1   3   1   1  21 3.81104     1507
   1   1   1   8   1   0   1   3   1   1  22 4.23235     1508
   1   1   1   8   1   0   1   3   1   1  23 5.54595     1509
   1   1   1   8   1   0   1   3   1   1  24 6.21872     1510
   1   1   1   8   1   0   1   3   1   1  25 5.79698     1511
   1   1   1   8   1   0   1   3   1   1  26 6.26356     1512
   1   1   1   8   1   0   1   3   1   1  27 6.62759     1513
   1   1   1   8   1   0   1   3   1   1  28 5.63920     1514
   1   1   1   8   1   0   1   3   2   1   2 3.49514     1515
   1   1   1   8   1   0   1   3   2   1   3 3.71603     1516
   1   1   1   8   1   0   1   3   2   1   4 4.12540     1517
   1   1   1   8   1   0   1   3   2   1   5 4.92856     1518
   1   1   1   8   1   0   1   3   2   1   6 5.35971     1519
   1   1   1   8   1   0   1   3   2   1   7 5.08575     1520
   1   1   1   8   1   0   1   3   2   1   8 4.28405     1521
   1   1   1   8   1   0   1   3   2   1   9 4.60848     1522
   1   1   1   8   1   0   1   3   2   1  10 4.42616     1523
   1   1   1   8   1   0   1   3   2   1  11 5.33937     1524
   1   1   1   8   1   0   1   3   2   1  12 5.70345     1525
   1   1   1   8   1   0   1   3   2   1  13 5.29161     1526
   1   1   1   8   1   0   1   3   2   1  14 4.41979     1527
   1   1   1   8   1   0   1   3   2   1  15 3.88200     1528
   1   1   1   8   1   0   1   3   2   1  16 6.02459     1529
   1   1   1   8   1   0   1   3   2   1  17 6.59652     1530
   1   1   1   8   1   0   1   3   2   1  18 5.95412     1531
   1   1   1   8   1   0   1   3   2   1  19 4.51288     1532
   1   1   1   8   1   0   1   3   2   1  20 5.86771     1533
   1   1   1   8   1   0   1   3   2   1  21 3.75416     1534
   1   1   1   8   1   0   1   3   2   1  22 4.23234     1535
   1   1   1   8   1   0   1   3   2   1  23 5.54595     1536
   1   1   1   8   1   0   1   3   2   1  24 6.21873     1537
   1   1   1   8   1   0   1   3   2   1  25 5.79699     1538
   1   1   1   8   1   0   1   3   2   1  26 3.47132     1539
   1   1   1   8   1   0   1   3   2   1  27 4.61827     1540
   1   1   1   8   1   0   1   3   2   1  28 3.48913     1541
   1   1   1   8   1   0   1   4   1   1  11 6.70318     1542
   1   1   1   8   1   0   1   4   1   1  12 6.26610     1543
   1   1   1   8   1   0   1   4   1   1  16 6.18297     1544
   1   1   1   8   1   0   1   4   1   1  17 5.30013     1545
   1   1   1   8   1   0   1   4   2   1  11 6.70318     1546
   1   1   1   8   1   0   1   4   2   1  12 6.26610     1547
   1   1   1   8   1   0   1   4   2   1  16 6.18297     1548
   1   1   1   8   1   0   1   4   2   1  17 5.30013     1549
   1   1   1   8   2   0   1   3   1   1   4 6.74035     1550
   1   1   1   8   2   0   1   3   1   1  21 6.75640     1551
   1   1   1   8   2   0   1   3   1   1  22 5.75178     1552
   1   1   1   8   2   0   1   3   1   1  23 6.42036     1553
   1   1   1   8   2   0   1   3   2   1   4 6.74035     1554
   1   1   1   8   2   0   1   3   2   1  21 6.79649     1555
   1   1   1   8   2   0   1   3   2   1  22 5.75177     1556
   1   1   1   8   2   0   1   3   2   1  23 6.42037     1557
   1   1   1   8   2   0   1   3   2   1  26 5.95055     1558
   1   1   1   8   2   0   1   3   2   1  27 6.83018     1559
   1   1   1   9  -1   0   0   1   1   1   2 6.41736     1560
   1   1   1   9  -1   0   0   1   1   1   3 5.99409     1561
   1   1   1   9  -1   0   0   1   1   1   4 4.88992     1562
   1   1   1   9  -1   0   0   1   1   1   5 5.00060     1563
   1   1   1   9  -1   0   0   1   1   1   6 6.15732     1564
   1   1   1   9  -1   0   0   1   1   1  21 5.75129     1565
   1   1   1   9  -1   0   0   1   1   1  22 4.24168     1566
   1   1   1   9  -1   0   0   1   1   1  23 4.47930     1567
   1   1   1   9  -1   0   0   1   1   1  24 6.54071     1568
   1   1   1   9  -1   0   0   1   2   1   2 6.41736     1569
   1   1   1   9  -1   0   0   1   2   1   3 5.99409     1570
   1   1   1   9  -1   0   0   1   2   1   4 4.88993     1571
   1   1   1   9  -1   0   0   1   2   1   5 5.00060     1572
   1   1   1   9  -1   0   0   1   2   1   6 6.15732     1573
   1   1   1   9  -1   0   0   1   2   1  21 5.77513     1574
   1   1   1   9  -1   0   0   1   2   1  22 4.24168     1575
   1   1   1   9  -1   0   0   1   2   1  23 4.47931     1576
   1   1   1   9  -1   0   0   1   2   1  24 6.54071     1577
   1   1   1   9  -1   0   0   1   2   1  26 5.36573     1578
   1   1   1   9  -1   0   0   1   2   1  27 5.47475     1579
   1   1   1   9  -1   0   0   1   2   1  28 6.51847     1580
   1   1   1   9  -1   0   0   4   1   1   5 6.12194     1581
   1   1   1   9  -1   0   0   4   1   1   6 6.52992     1582
   1   1   1   9  -1   0   0   4   1   1  23 5.12603     1583
   1   1   1   9  -1   0   0   4   1   1  24 5.94694     1584
   1   1   1   9  -1   0   0   4   2   1   5 6.12194     1585
   1   1   1   9  -1   0   0   4   2   1   6 6.52993     1586
   1   1   1   9  -1   0   0   4   2   1  23 5.12604     1587
   1   1   1   9  -1   0   0   4   2   1  24 5.94695     1588
   1   1   1   9   0  -1   0   2   1   1  11 6.16206     1589
   1   1   1   9   0  -1   0   2   1   1  12 5.10771     1590
   1   1   1   9   0  -1   0   2   1   1  13 5.36757     1591
   1   1   1   9   0  -1   0   2   1   1  14 6.58848     1592
   1   1   1   9   0  -1   0   2   1   1  16 6.30480     1593
   1   1   1   9   0  -1   0   2   1   1  17 4.31124     1594
   1   1   1   9   0  -1   0   2   1   1  18 4.83196     1595
   1   1   1   9   0  -1   0   2   2   1  11 6.16206     1596
   1   1   1   9   0  -1   0   2   2   1  12 5.10771     1597
   1   1   1   9   0  -1   0   2   2   1  13 5.36757     1598
   1   1   1   9   0  -1   0   2   2   1  14 6.58848     1599
   1   1   1   9   0  -1   0   2   2   1  16 6.30481     1600
   1   1   1   9   0  -1   0   2   2   1  17 4.31125     1601
   1   1   1   9   0  -1   0   2   2   1  18 4.83196     1602
   1   1   1   9   0  -1   1   3   1   1  20 6.82398     1603
   1   1   1   9   0  -1   1   3   1   1  26 6.54071     1604
   1   1   1   9   0  -1   1   3   1   1  27 6.45328     1605
   1   1   1   9   0  -1   1   3   1   1  28 6.63102     1606
   1   1   1   9   0  -1   1   3   2   1  20 6.74782     1607
   1   1   1   9   0   0   0   2   1   1  16 6.70003     1608
   1   1   1   9   0   0   0   2   1   1  26 6.73576     1609
   1   1   1   9   0   0   0   2   2   1  16 6.70002     1610
   1   1   1   9   0   0   0   4   1   1   5 6.37643     1611
   1   1   1   9   0   0   0   4   1   1   6 5.37560     1612
   1   1   1   9   0   0   0   4   1   1   7 5.36824     1613
   1   1   1   9   0   0   0   4   1   1   8 6.37738     1614
   1   1   1   9   0   0   0   4   1   1   9 6.83055     1615
   1   1   1   9   0   0   0   4   1   1  20 6.36240     1616
   1   1   1   9   0   0   0   4   1   1  23 6.68483     1617
   1   1   1   9   0   0   0   4   1   1  24 4.89718     1618
   1   1   1   9   0   0   0   4   1   1  25 4.88058     1619
   1   1   1   9   0   0   0   4   1   1  27 6.51024     1620
   1   1   1   9   0   0   0   4   1   1  28 5.36649     1621
   1   1   1   9   0   0   0   4   2   1   5 6.37643     1622
   1   1   1   9   0   0   0   4   2   1   6 5.37560     1623
   1   1   1   9   0   0   0   4   2   1   7 5.36823     1624
   1   1   1   9   0   0   0   4   2   1   8 6.37738     1625
   1   1   1   9   0   0   0   4   2   1   9 6.83055     1626
   1   1   1   9   0   0   0   4   2   1  20 6.32126     1627
   1   1   1   9   0   0   0   4   2   1  23 6.68483     1628
   1   1   1   9   0   0   0   4   2   1  24 4.89717     1629
   1   1   1   9   0   0   0   4   2   1  25 4.88058     1630
   1   1   1   9   0   0   1   3   1   1  11 6.84401     1631
   1   1   1   9   0   0   1   3   1   1  16 6.55026     1632
   1   1   1   9   0   0   1   3   1   1  17 6.99494     1633
   1   1   1   9   0   0   1   3   1   1  26 6.82438     1634
   1   1   1   9   0   0   1   3   1   1  28 6.78250     1635
   1   1   1   9   0   0   1   3   2   1  11 6.84401     1636
   1   1   1   9   0   0   1   3   2   1  16 6.55027     1637
   1   1   1   9   0   0   1   3   2   1  17 6.99494     1638
   1   1   1   9   0   0   1   4   1   1   2 6.63490     1639
   1   1   1   9   0   0   1   4   1   1   9 6.83055     1640
   1   1   1   9   0   0   1   4   1   1  10 5.95666     1641
   1   1   1   9   0   0   1   4   1   1  11 5.58860     1642
   1   1   1   9   0   0   1   4   1   1  12 5.12503     1643
   1   1   1   9   0   0   1   4   1   1  13 5.01461     1644
   1   1   1   9   0   0   1   4   1   1  14 5.37465     1645
   1   1   1   9   0   0   1   4   1   1  15 5.83979     1646
   1   1   1   9   0   0   1   4   1   1  16 6.02018     1647
   1   1   1   9   0   0   1   4   1   1  17 5.22664     1648
   1   1   1   9   0   0   1   4   1   1  18 5.04500     1649
   1   1   1   9   0   0   1   4   1   1  19 5.66270     1650
   1   1   1   9   0   0   1   4   2   1   2 6.63489     1651
   1   1   1   9   0   0   1   4   2   1   9 6.83056     1652
   1   1   1   9   0   0   1   4   2   1  10 5.95666     1653
   1   1   1   9   0   0   1   4   2   1  11 5.58862     1654
   1   1   1   9   0   0   1   4   2   1  12 5.12505     1655
   1   1   1   9   0   0   1   4   2   1  13 5.01462     1656
   1   1   1   9   0   0   1   4   2   1  14 5.37465     1657
   1   1   1   9   0   0   1   4   2   1  15 5.83979     1658
   1   1   1   9   0   0   1   4   2   1  16 6.02020     1659
   1   1   1   9   0   0   1   4   2   1  17 5.22666     1660
   1   1   1   9   0   0   1   4   2   1  18 5.04501     1661
   1   1   1   9   0   0   1   4   2   1  19 5.66270     1662
   1   1   1   9   0   0   1   4   2   1  27 6.56253     1663
   1   1   1   9   0   1   1   4   1   1  18 6.53949     1664
   1   1   1   9   0   1   1   4   2   1  18 6.53948     1665
   1   1   1   9   1  -1   0   2   1   1   2 5.02237     1666
   1   1   1   9   1  -1   0   2   1   1   3 6.36809     1667
   1   1   1   9   1  -1   0   2   1   1   4 6.93454     1668
   1   1   1   9   1  -1   0   2   1   1  10 6.20375     1669
   1   1   1   9   1  -1   0   2   1   1  11 6.54496     1670
   1   1   1   9   1  -1   0   2   1   1  12 5.78751     1671
   1   1   1   9   1  -1   0   2   1   1  13 4.39489     1672
   1   1   1   9   1  -1   0   2   1   1  14 3.81372     1673
   1   1   1   9   1  -1   0   2   1   1  15 4.88608     1674
   1   1   1   9   1  -1   0   2   1   1  17 6.42284     1675
   1   1   1   9   1  -1   0   2   1   1  18 4.03506     1676
   1   1   1   9   1  -1   0   2   1   1  19 2.78161     1677
   1   1   1   9   1  -1   0   2   1   1  21 3.93842     1678
   1   1   1   9   1  -1   0   2   1   1  22 6.43873     1679
   1   1   1   9   1  -1   0   2   2   1   2 5.02238     1680
   1   1   1   9   1  -1   0   2   2   1   3 6.36809     1681
   1   1   1   9   1  -1   0   2   2   1   4 6.93454     1682
   1   1   1   9   1  -1   0   2   2   1  10 6.20375     1683
   1   1   1   9   1  -1   0   2   2   1  11 6.54496     1684
   1   1   1   9   1  -1   0   2   2   1  12 5.78751     1685
   1   1   1   9   1  -1   0   2   2   1  13 4.39490     1686
   1   1   1   9   1  -1   0   2   2   1  14 3.81372     1687
   1   1   1   9   1  -1   0   2   2   1  15 4.88609     1688
   1   1   1   9   1  -1   0   2   2   1  17 6.42285     1689
   1   1   1   9   1  -1   0   2   2   1  18 4.03506     1690
   1   1   1   9   1  -1   0   2   2   1  19 2.78162     1691
   1   1   1   9   1  -1   0   2   2   1  21 3.99253     1692
   1   1   1   9   1  -1   0   2   2   1  22 6.43873     1693
   1   1   1   9   1  -1   0   2   2   1  26 4.64371     1694
   1   1   1   9   1  -1   0   2   2   1  27 3.69832     1695
   1   1   1   9   1  -1   0   2   2   1  28 3.40713     1696
   1   1   1   9   1  -1   1   3   1   1   3 6.83593     1697
   1   1   1   9   1  -1   1   3   1   1   4 6.74565     1698
   1   1   1   9   1  -1   1   3   1   1   5 5.84990     1699
   1   1   1   9   1  -1   1   3   1   1   6 4.84886     1700
   1   1   1   9   1  -1   1   3   1   1   7 4.91994     1701
   1   1   1   9   1  -1   1   3   1   1   8 5.98937     1702
   1   1   1   9   1  -1   1   3   1   1   9 6.53907     1703
   1   1   1   9   1  -1   1   3   1   1  20 6.12801     1704
   1   1   1   9   1  -1   1   3   1   1  23 6.14592     1705
   1   1   1   9   1  -1   1   3   1   1  24 4.33329     1706
   1   1   1   9   1  -1   1   3   1   1  25 4.46977     1707
   1   1   1   9   1  -1   1   3   1   1  26 6.88798     1708
   1   1   1   9   1  -1   1   3   1   1  27 5.21985     1709
   1   1   1   9   1  -1   1   3   1   1  28 6.15834     1710
   1   1   1   9   1  -1   1   3   2   1   3 6.83592     1711
   1   1   1   9   1  -1   1   3   2   1   4 6.74565     1712
   1   1   1   9   1  -1   1   3   2   1   5 5.84990     1713
   1   1   1   9   1  -1   1   3   2   1   6 4.84885     1714
   1   1   1   9   1  -1   1   3   2   1   7 4.91993     1715
   1   1   1   9   1  -1   1   3   2   1   8 5.98936     1716
   1   1   1   9   1  -1   1   3   2   1   9 6.53906     1717
   1   1   1   9   1  -1   1   3   2   1  20 6.12326     1718
   1   1   1   9   1  -1   1   3   2   1  23 6.14592     1719
   1   1   1   9   1  -1   1   3   2   1  24 4.33329     1720
   1   1   1   9   1  -1   1   3   2   1  25 4.46977     1721
   1   1   1   9   1   0   0   1   1   1  16 6.17355     1722
   1   1   1   9   1   0   0   1   1   1  17 6.88116     1723
   1   1   1   9   1   0   0   1   1   1  26 6.23372     1724
   1   1   1   9   1   0   0   1   2   1  16 6.17355     1725
   1   1   1   9   1   0   0   1   2   1  17 6.88116     1726
   1   1   1   9   1   0   0   2   1   1  27 6.90098     1727
   1   1   1   9   1   0   1   2   1   1  24 6.69486     1728
   1   1   1   9   1   0   1   2   2   1  24 6.69486     1729
   1   1   1   9   1   0   1   3   1   1   2 3.88762     1730
   1   1   1   9   1   0   1   3   1   1   3 3.82989     1731
   1   1   1   9   1   0   1   3   1   1   4 3.72702     1732
   1   1   1   9   1   0   1   3   1   1   5 4.38803     1733
   1   1   1   9   1   0   1   3   1   1   6 5.06576     1734
   1   1   1   9   1   0   1   3   1   1   7 5.16033     1735
   1   1   1   9   1   0   1   3   1   1   8 4.60848     1736
   1   1   1   9   1   0   1   3   1   1   9 5.29788     1737
   1   1   1   9   1   0   1   3   1   1  10 5.33013     1738
   1   1   1   9   1   0   1   3   1   1  11 6.43161     1739
   1   1   1   9   1   0   1   3   1   1  12 6.87278     1740
   1   1   1   9   1   0   1   3   1   1  13 6.38209     1741
   1   1   1   9   1   0   1   3   1   1  14 5.33446     1742
   1   1   1   9   1   0   1   3   1   1  15 4.68239     1743
   1   1   1   9   1   0   1   3   1   1  19 5.27369     1744
   1   1   1   9   1   0   1   3   1   1  20 6.56078     1745
   1   1   1   9   1   0   1   3   1   1  21 3.87704     1746
   1   1   1   9   1   0   1   3   1   1  22 3.63819     1747
   1   1   1   9   1   0   1   3   1   1  23 4.76331     1748
   1   1   1   9   1   0   1   3   1   1  24 5.83760     1749
   1   1   1   9   1   0   1   3   1   1  25 5.98536     1750
   1   1   1   9   1   0   1   3   1   1  28 6.32115     1751
   1   1   1   9   1   0   1   3   2   1   2 3.88760     1752
   1   1   1   9   1   0   1   3   2   1   3 3.82988     1753
   1   1   1   9   1   0   1   3   2   1   4 3.72701     1754
   1   1   1   9   1   0   1   3   2   1   5 4.38802     1755
   1   1   1   9   1   0   1   3   2   1   6 5.06576     1756
   1   1   1   9   1   0   1   3   2   1   7 5.16034     1757
   1   1   1   9   1   0   1   3   2   1   8 4.60848     1758
   1   1   1   9   1   0   1   3   2   1   9 5.29788     1759
   1   1   1   9   1   0   1   3   2   1  10 5.33012     1760
   1   1   1   9   1   0   1   3   2   1  11 6.43161     1761
   1   1   1   9   1   0   1   3   2   1  12 6.87277     1762
   1   1   1   9   1   0   1   3   2   1  13 6.38207     1763
   1   1   1   9   1   0   1   3   2   1  14 5.33445     1764
   1   1   1   9   1   0   1   3   2   1  15 4.68238     1765
   1   1   1   9   1   0   1   3   2   1  19 5.27367     1766
   1   1   1   9   1   0   1   3   2   1  20 6.60681     1767
   1   1   1   9   1   0   1   3   2   1  21 3.83107     1768
   1   1   1   9   1   0   1   3   2   1  22 3.63818     1769
   1   1   1   9   1   0   1   3   2   1  23 4.76331     1770
   1   1   1   9   1   0   1   3   2   1  24 5.83761     1771
   1   1   1   9   1   0   1   3   2   1  25 5.98537     1772
   1   1   1   9   1   0   1   3   2   1  26 3.18923     1773
   1   1   1   9   1   0   1   3   2   1  27 4.67779     1774
   1   1   1   9   1   0   1   3   2   1  28 3.70746     1775
   1   1   1   9   1   0   1   4   1   1  17 6.56730     1776
   1   1   1   9   1   0   1   4   2   1  17 6.56730     1777
   1   1   1   9   2   0   1   3   1   1  22 6.95341     1778
   1   1   1   9   2   0   1   3   2   1  22 6.95340     1779
   1   1   1  10  -1   0   0   1   1   1   2 6.00935     1780
   1   1   1  10  -1   0   0   1   1   1   3 5.90074     1781
   1   1   1  10  -1   0   0   1   1   1   4 4.98798     1782
   1   1   1  10  -1   0   0   1   1   1   5 5.46211     1783
   1   1   1  10  -1   0   0   1   1   1   6 6.68561     1784
   1   1   1  10  -1   0   0   1   1   1  21 5.05915     1785
   1   1   1  10  -1   0   0   1   1   1  22 4.18073     1786
   1   1   1  10  -1   0   0   1   1   1  23 5.14097     1787
   1   1   1  10  -1   0   0   1   2   1   2 6.00935     1788
   1   1   1  10  -1   0   0   1   2   1   3 5.90075     1789
   1   1   1  10  -1   0   0   1   2   1   4 4.98798     1790
   1   1   1  10  -1   0   0   1   2   1   5 5.46211     1791
   1   1   1  10  -1   0   0   1   2   1   6 6.68561     1792
   1   1   1  10  -1   0   0   1   2   1  21 5.10021     1793
   1   1   1  10  -1   0   0   1   2   1  22 4.18073     1794
   1   1   1  10  -1   0   0   1   2   1  23 5.14097     1795
   1   1   1  10  -1   0   0   1   2   1  26 4.78965     1796
   1   1   1  10  -1   0   0   1   2   1  27 4.67213     1797
   1   1   1  10  -1   0   0   1   2   1  28 5.75325     1798
   1   1   1  10  -1   0   0   4   1   1   4 6.53280     1799
   1   1   1  10  -1   0   0   4   1   1   5 5.40337     1800
   1   1   1  10  -1   0   0   4   1   1   6 5.76895     1801
   1   1   1  10  -1   0   0   4   1   1  22 6.59882     1802
   1   1   1  10  -1   0   0   4   1   1  23 4.42175     1803
   1   1   1  10  -1   0   0   4   1   1  24 5.16903     1804
   1   1   1  10  -1   0   0   4   2   1   4 6.53280     1805
   1   1   1  10  -1   0   0   4   2   1   5 5.40337     1806
   1   1   1  10  -1   0   0   4   2   1   6 5.76896     1807
   1   1   1  10  -1   0   0   4   2   1  22 6.59882     1808
   1   1   1  10  -1   0   0   4   2   1  23 4.42176     1809
   1   1   1  10  -1   0   0   4   2   1  24 5.16904     1810
   1   1   1  10   0  -1   0   2   1   1  11 6.29945     1811
   1   1   1  10   0  -1   0   2   1   1  12 5.35077     1812
   1   1   1  10   0  -1   0   2   1   1  13 5.50068     1813
   1   1   1  10   0  -1   0   2   1   1  14 6.55444     1814
   1   1   1  10   0  -1   0   2   1   1  16 6.50578     1815
   1   1   1  10   0  -1   0   2   1   1  17 4.76006     1816
   1   1   1  10   0  -1   0   2   1   1  18 5.04600     1817
   1   1   1  10   0  -1   0   2   1   1  19 6.94517     1818
   1   1   1  10   0  -1   0   2   2   1  11 6.29945     1819
   1   1   1  10   0  -1   0   2   2   1  12 5.35077     1820
   1   1   1  10   0  -1   0   2   2   1  13 5.50068     1821
   1   1   1  10   0  -1   0   2   2   1  14 6.55444     1822
   1   1   1  10   0  -1   0   2   2   1  16 6.50578     1823
   1   1   1  10   0  -1   0   2   2   1  17 4.76007     1824
   1   1   1  10   0  -1   0   2   2   1  18 5.04599     1825
   1   1   1  10   0  -1   0   2   2   1  19 6.94517     1826
   1   1   1  10   0   0   0   2   1   1  11 6.36579     1827
   1   1   1  10   0   0   0   2   1   1  12 6.81250     1828
   1   1   1  10   0   0   0   2   1   1  16 5.49110     1829
   1   1   1  10   0   0   0   2   1   1  17 6.37288     1830
   1   1   1  10   0   0   0   2   1   1  20 6.24617     1831
   1   1   1  10   0   0   0   2   1   1  26 5.44176     1832
   1   1   1  10   0   0   0   2   1   1  27 6.01631     1833
   1   1   1  10   0   0   0   2   1   1  28 6.90659     1834
   1   1   1  10   0   0   0   2   2   1  11 6.36578     1835
   1   1   1  10   0   0   0   2   2   1  12 6.81249     1836
   1   1   1  10   0   0   0   2   2   1  16 5.49110     1837
   1   1   1  10   0   0   0   2   2   1  17 6.37287     1838
   1   1   1  10   0   0   0   2   2   1  20 6.22406     1839
   1   1   1  10   0   0   0   4   1   1   3 6.67551     1840
   1   1   1  10   0   0   0   4   1   1   4 6.79942     1841
   1   1   1  10   0   0   0   4   1   1   5 5.95573     1842
   1   1   1  10   0   0   0   4   1   1   6 4.75727     1843
   1   1   1  10   0   0   0   4   1   1   7 4.54000     1844
   1   1   1  10   0   0   0   4   1   1   8 5.61035     1845
   1   1   1  10   0   0   0   4   1   1   9 5.95666     1846
   1   1   1  10   0   0   0   4   1   1  20 5.29136     1847
   1   1   1  10   0   0   0   4   1   1  23 6.40751     1848
   1   1   1  10   0   0   0   4   1   1  24 4.29286     1849
   1   1   1  10   0   0   0   4   1   1  25 3.84828     1850
   1   1   1  10   0   0   0   4   1   1  26 5.99904     1851
   1   1   1  10   0   0   0   4   1   1  27 5.30851     1852
   1   1   1  10   0   0   0   4   1   1  28 4.33235     1853
   1   1   1  10   0   0   0   4   2   1   3 6.67550     1854
   1   1   1  10   0   0   0   4   2   1   4 6.79942     1855
   1   1   1  10   0   0   0   4   2   1   5 5.95572     1856
   1   1   1  10   0   0   0   4   2   1   6 4.75726     1857
   1   1   1  10   0   0   0   4   2   1   7 4.53999     1858
   1   1   1  10   0   0   0   4   2   1   8 5.61034     1859
   1   1   1  10   0   0   0   4   2   1   9 5.95665     1860
   1   1   1  10   0   0   0   4   2   1  20 5.24414     1861
   1   1   1  10   0   0   0   4   2   1  23 6.40750     1862
   1   1   1  10   0   0   0   4   2   1  24 4.29285     1863
   1   1   1  10   0   0   0   4   2   1  25 3.84827     1864
   1   1   1  10   0   0   1   3   1   1  16 6.69637     1865
   1   1   1  10   0   0   1   3   1   1  20 6.85838     1866
   1   1   1  10   0   0   1   3   1   1  26 6.58041     1867
   1   1   1  10   0   0   1   3   1   1  28 6.25643     1868
   1   1   1  10   0   0   1   3   2   1  16 6.69638     1869
   1   1   1  10   0   0   1   3   2   1  20 6.82100     1870
   1   1   1  10   0   0   1   4   1   1  11 6.78725     1871
   1   1   1  10   0   0   1   4   1   1  12 6.34588     1872
   1   1   1  10   0   0   1   4   1   1  13 6.34396     1873
   1   1   1  10   0   0   1   4   1   1  14 6.77352     1874
   1   1   1  10   0   0   1   4   1   1  17 6.30814     1875
   1   1   1  10   0   0   1   4   1   1  18 6.31539     1876
   1   1   1  10   0   0   1   4   2   1  11 6.78726     1877
   1   1   1  10   0   0   1   4   2   1  12 6.34589     1878
   1   1   1  10   0   0   1   4   2   1  13 6.34397     1879
   1   1   1  10   0   0   1   4   2   1  14 6.77352     1880
   1   1   1  10   0   0   1   4   2   1  17 6.30816     1881
   1   1   1  10   0   0   1   4   2   1  18 6.31540     1882
   1   1   1  10   0   1   1   4   1   1  18 6.31539     1883
   1   1   1  10   0   1   1   4   2   1  18 6.31539     1884
   1   1   1  10   1  -1   0   2   1   1   2 4.99804     1885
   1   1   1  10   1  -1   0   2   1   1   3 6.27441     1886
   1   1   1  10   1  -1   0   2   1   1   4 6.70106     1887
   1   1   1  10   1  -1   0   2   1   1  10 6.42494     1888
   1   1   1  10   1  -1   0   2   1   1  11 6.90232     1889
   1   1   1  10   1  -1   0   2   1   1  12 6.25546     1890
   1   1   1  10   1  -1   0   2   1   1  13 4.88419     1891
   1   1   1  10   1  -1   0   2   1   1  14 4.14615     1892
   1   1   1  10   1  -1   0   2   1   1  15 5.05904     1893
   1   1   1  10   1  -1   0   2   1   1  17 6.95829     1894
   1   1   1  10   1  -1   0   2   1   1  18 4.63567     1895
   1   1   1  10   1  -1   0   2   1   1  19 3.09457     1896
   1   1   1  10   1  -1   0   2   1   1  21 3.73964     1897
   1   1   1  10   1  -1   0   2   1   1  22 6.12073     1898
   1   1   1  10   1  -1   0   2   2   1   2 4.99804     1899
   1   1   1  10   1  -1   0   2   2   1   3 6.27441     1900
   1   1   1  10   1  -1   0   2   2   1   4 6.70106     1901
   1   1   1  10   1  -1   0   2   2   1  10 6.42495     1902
   1   1   1  10   1  -1   0   2   2   1  11 6.90232     1903
   1   1   1  10   1  -1   0   2   2   1  12 6.25547     1904
   1   1   1  10   1  -1   0   2   2   1  13 4.88419     1905
   1   1   1  10   1  -1   0   2   2   1  14 4.14616     1906
   1   1   1  10   1  -1   0   2   2   1  15 5.05905     1907
   1   1   1  10   1  -1   0   2   2   1  17 6.95829     1908
   1   1   1  10   1  -1   0   2   2   1  18 4.63567     1909
   1   1   1  10   1  -1   0   2   2   1  19 3.09457     1910
   1   1   1  10   1  -1   0   2   2   1  21 3.79334     1911
   1   1   1  10   1  -1   0   2   2   1  22 6.12073     1912
   1   1   1  10   1  -1   0   2   2   1  26 4.18149     1913
   1   1   1  10   1  -1   0   2   2   1  27 3.74685     1914
   1   1   1  10   1  -1   0   2   2   1  28 3.00442     1915
   1   1   1  10   1  -1   1   3   1   1   5 6.77783     1916
   1   1   1  10   1  -1   1   3   1   1   6 5.76827     1917
   1   1   1  10   1  -1   1   3   1   1   7 5.98831     1918
   1   1   1  10   1  -1   1   3   1   1  23 6.92483     1919
   1   1   1  10   1  -1   1   3   1   1  24 5.04944     1920
   1   1   1  10   1  -1   1   3   1   1  25 5.48259     1921
   1   1   1  10   1  -1   1   3   1   1  27 6.39384     1922
   1   1   1  10   1  -1   1   3   2   1   5 6.77783     1923
   1   1   1  10   1  -1   1   3   2   1   6 5.76827     1924
   1   1   1  10   1  -1   1   3   2   1   7 5.98830     1925
   1   1   1  10   1  -1   1   3   2   1  23 6.92482     1926
   1   1   1  10   1  -1   1   3   2   1  24 5.04944     1927
   1   1   1  10   1  -1   1   3   2   1  25 5.48258     1928
   1   1   1  10   1   0   0   1   1   1  16 6.20519     1929
   1   1   1  10   1   0   0   1   1   1  17 6.39578     1930
   1   1   1  10   1   0   0   1   1   1  26 6.66759     1931
   1   1   1  10   1   0   0   1   2   1  16 6.20519     1932
   1   1   1  10   1   0   0   1   2   1  17 6.39578     1933
   1   1   1  10   1   0   0   2   1   1   2 6.48657     1934
   1   1   1  10   1   0   0   2   1   1   3 6.27897     1935
   1   1   1  10   1   0   0   2   1   1   4 6.67178     1936
   1   1   1  10   1   0   0   2   1   1   5 6.91418     1937
   1   1   1  10   1   0   0   2   1   1   6 6.77630     1938
   1   1   1  10   1   0   0   2   1   1   7 6.39730     1939
   1   1   1  10   1   0   0   2   1   1   8 6.13006     1940
   1   1   1  10   1   0   0   2   1   1   9 6.20375     1941
   1   1   1  10   1   0   0   2   1   1  10 6.42494     1942
   1   1   1  10   1   0   0   2   1   1  11 6.96292     1943
   1   1   1  10   1   0   0   2   1   1  15 6.57396     1944
   1   1   1  10   1   0   0   2   1   1  20 6.59046     1945
   1   1   1  10   1   0   0   2   1   1  25 6.61214     1946
   1   1   1  10   1   0   0   2   1   1  26 6.90723     1947
   1   1   1  10   1   0   0   2   1   1  27 5.93564     1948
   1   1   1  10   1   0   0   2   2   1   2 6.48658     1949
   1   1   1  10   1   0   0   2   2   1   3 6.27898     1950
   1   1   1  10   1   0   0   2   2   1   4 6.67179     1951
   1   1   1  10   1   0   0   2   2   1   5 6.91419     1952
   1   1   1  10   1   0   0   2   2   1   6 6.77631     1953
   1   1   1  10   1   0   0   2   2   1   7 6.39731     1954
   1   1   1  10   1   0   0   2   2   1   8 6.13006     1955
   1   1   1  10   1   0   0   2   2   1   9 6.20375     1956
   1   1   1  10   1   0   0   2   2   1  10 6.42495     1957
   1   1   1  10   1   0   0   2   2   1  11 6.96292     1958
   1   1   1  10   1   0   0   2   2   1  15 6.57396     1959
   1   1   1  10   1   0   0   2   2   1  20 6.64334     1960
   1   1   1  10   1   0   0   2   2   1  25 6.61215     1961
   1   1   1  10   1   0   0   2   2   1  27 6.71302     1962
   1   1   1  10   1   0   1   3   1   1   2 4.40651     1963
   1   1   1  10   1   0   1   3   1   1   3 3.87452     1964
   1   1   1  10   1   0   1   3   1   1   4 3.48650     1965
   1   1   1  10   1   0   1   3   1   1   5 3.69590     1966
   1   1   1  10   1   0   1   3   1   1   6 4.25566     1967
   1   1   1  10   1   0   1   3   1   1   7 4.57934     1968
   1   1   1  10   1   0   1   3   1   1   8 4.42616     1969
   1   1   1  10   1   0   1   3   1   1   9 5.33013     1970
   1   1   1  10   1   0   1   3   1   1  10 5.72029     1971
   1   1   1  10   1   0   1   3   1   1  11 6.91651     1972
   1   1   1  10   1   0   1   3   1   1  14 6.23073     1973
   1   1   1  10   1   0   1   3   1   1  15 5.31846     1974
   1   1   1  10   1   0   1   3   1   1  19 6.30331     1975
   1   1   1  10   1   0   1   3   1   1  20 6.41223     1976
   1   1   1  10   1   0   1   3   1   1  21 4.66340     1977
   1   1   1  10   1   0   1   3   1   1  22 3.60325     1978
   1   1   1  10   1   0   1   3   1   1  23 3.94427     1979
   1   1   1  10   1   0   1   3   1   1  24 4.84606     1980
   1   1   1  10   1   0   1   3   1   1  25 5.34712     1981
   1   1   1  10   1   0   1   3   1   1  27 6.97536     1982
   1   1   1  10   1   0   1   3   1   1  28 6.01591     1983
   1   1   1  10   1   0   1   3   2   1   2 4.40649     1984
   1   1   1  10   1   0   1   3   2   1   3 3.87451     1985
   1   1   1  10   1   0   1   3   2   1   4 3.48649     1986
   1   1   1  10   1   0   1   3   2   1   5 3.69589     1987
   1   1   1  10   1   0   1   3   2   1   6 4.25567     1988
   1   1   1  10   1   0   1   3   2   1   7 4.57934     1989
   1   1   1  10   1   0   1   3   2   1   8 4.42616     1990
   1   1   1  10   1   0   1   3   2   1   9 5.33013     1991
   1   1   1  10   1   0   1   3   2   1  10 5.72029     1992
   1   1   1  10   1   0   1   3   2   1  11 6.91651     1993
   1   1   1  10   1   0   1   3   2   1  14 6.23072     1994
   1   1   1  10   1   0   1   3   2   1  15 5.31845     1995
   1   1   1  10   1   0   1   3   2   1  19 6.30329     1996
   1   1   1  10   1   0   1   3   2   1  20 6.44831     1997
   1   1   1  10   1   0   1   3   2   1  21 4.60984     1998
   1   1   1  10   1   0   1   3   2   1  22 3.60323     1999
   1   1   1  10   1   0   1   3   2   1  23 3.94427     2000
   1   1   1  10   1   0   1   3   2   1  24 4.84606     2001
   1   1   1  10   1   0   1   3   2   1  25 5.34712     2002
   1   1   1  10   1   0   1   3   2   1  26 3.90577     2003
   1   1   1  10   1   0   1   3   2   1  27 5.40919     2004
   1   1   1  10   1   0   1   3   2   1  28 4.72963     2005
   1   1   1  11  -1   0   0   1   1   1   2 4.89619     2006
   1   1   1  11  -1   0   0   1   1   1   3 4.98883     2007
   1   1   1  11  -1   0   0   1   1   1   4 4.36276     2008
   1   1   1  11  -1   0   0   1   1   1   5 5.10513     2009
   1   1   1  11  -1   0   0   1   1   1   6 6.24747     2010
   1   1   1  11  -1   0   0   1   1   1   7 6.70220     2011
   1   1   1  11  -1   0   0   1   1   1   8 6.18246     2012
   1   1   1  11  -1   0   0   1   1   1  14 6.42268     2013
   1   1   1  11  -1   0   0   1   1   1  15 5.99481     2014
   1   1   1  11  -1   0   0   1   1   1  19 5.96320     2015
   1   1   1  11  -1   0   0   1   1   1  21 3.96864     2016
   1   1   1  11  -1   0   0   1   1   1  22 3.62243     2017
   1   1   1  11  -1   0   0   1   1   1  23 5.07556     2018
   1   1   1  11  -1   0   0   1   1   1  24 6.97158     2019
   1   1   1  11  -1   0   0   1   2   1   2 4.89619     2020
   1   1   1  11  -1   0   0   1   2   1   3 4.98883     2021
   1   1   1  11  -1   0   0   1   2   1   4 4.36276     2022
   1   1   1  11  -1   0   0   1   2   1   5 5.10513     2023
   1   1   1  11  -1   0   0   1   2   1   6 6.24747     2024
   1   1   1  11  -1   0   0   1   2   1   7 6.70221     2025
   1   1   1  11  -1   0   0   1   2   1   8 6.18246     2026
   1   1   1  11  -1   0   0   1   2   1  14 6.42268     2027
   1   1   1  11  -1   0   0   1   2   1  15 5.99481     2028
   1   1   1  11  -1   0   0   1   2   1  19 5.96321     2029
   1   1   1  11  -1   0   0   1   2   1  21 4.01209     2030
   1   1   1  11  -1   0   0   1   2   1  22 3.62243     2031
   1   1   1  11  -1   0   0   1   2   1  23 5.07556     2032
   1   1   1  11  -1   0   0   1   2   1  24 6.97158     2033
   1   1   1  11  -1   0   0   1   2   1  26 3.94356     2034
   1   1   1  11  -1   0   0   1   2   1  27 3.45203     2035
   1   1   1  11  -1   0   0   1   2   1  28 4.70143     2036
   1   1   1  11  -1   0   0   4   1   1   3 6.53823     2037
   1   1   1  11  -1   0   0   4   1   1   4 5.33833     2038
   1   1   1  11  -1   0   0   4   1   1   5 4.11673     2039
   1   1   1  11  -1   0   0   4   1   1   6 4.35781     2040
   1   1   1  11  -1   0   0   4   1   1   7 5.69706     2041
   1   1   1  11  -1   0   0   4   1   1   8 6.70318     2042
   1   1   1  11  -1   0   0   4   1   1  22 5.56468     2043
   1   1   1  11  -1   0   0   4   1   1  23 3.22615     2044
   1   1   1  11  -1   0   0   4   1   1  24 3.73858     2045
   1   1   1  11  -1   0   0   4   1   1  25 6.15898     2046
   1   1   1  11  -1   0   0   4   2   1   3 6.53823     2047
   1   1   1  11  -1   0   0   4   2   1   4 5.33833     2048
   1   1   1  11  -1   0   0   4   2   1   5 4.11673     2049
   1   1   1  11  -1   0   0   4   2   1   6 4.35781     2050
   1   1   1  11  -1   0   0   4   2   1   7 5.69707     2051
   1   1   1  11  -1   0   0   4   2   1   8 6.70318     2052
   1   1   1  11  -1   0   0   4   2   1  22 5.56468     2053
   1   1   1  11  -1   0   0   4   2   1  23 3.22615     2054
   1   1   1  11  -1   0   0   4   2   1  24 3.73859     2055
   1   1   1  11  -1   0   0   4   2   1  25 6.15899     2056
   1   1   1  11   0  -1   0   2   1   1  10 6.36578     2057
   1   1   1  11   0  -1   0   2   1   1  11 5.55615     2058
   1   1   1  11   0  -1   0   2   1   1  12 4.65692     2059
   1   1   1  11   0  -1   0   2   1   1  13 4.61162     2060
   1   1   1  11   0  -1   0   2   1   1  14 5.48394     2061
   1   1   1  11   0  -1   0   2   1   1  15 6.31752     2062
   1   1   1  11   0  -1   0   2   1   1  16 5.92908     2063
   1   1   1  11   0  -1   0   2   1   1  17 4.33828     2064
   1   1   1  11   0  -1   0   2   1   1  18 4.24423     2065
   1   1   1  11   0  -1   0   2   1   1  19 5.81542     2066
   1   1   1  11   0  -1   0   2   2   1  10 6.36578     2067
   1   1   1  11   0  -1   0   2   2   1  11 5.55615     2068
   1   1   1  11   0  -1   0   2   2   1  12 4.65692     2069
   1   1   1  11   0  -1   0   2   2   1  13 4.61162     2070
   1   1   1  11   0  -1   0   2   2   1  14 5.48394     2071
   1   1   1  11   0  -1   0   2   2   1  15 6.31752     2072
   1   1   1  11   0  -1   0   2   2   1  16 5.92908     2073
   1   1   1  11   0  -1   0   2   2   1  17 4.33829     2074
   1   1   1  11   0  -1   0   2   2   1  18 4.24423     2075
   1   1   1  11   0  -1   0   2   2   1  19 5.81541     2076
   1   1   1  11   0  -1   1   3   1   1  27 6.87342     2077
   1   1   1  11   0   0   0   2   1   1   9 6.16206     2078
   1   1   1  11   0   0   0   2   1   1  10 6.29945     2079
   1   1   1  11   0   0   0   2   1   1  11 5.55616     2080
   1   1   1  11   0   0   0   2   1   1  12 6.21499     2081
   1   1   1  11   0   0   0   2   1   1  16 4.70540     2082
   1   1   1  11   0   0   0   2   1   1  17 5.99465     2083
   1   1   1  11   0   0   0   2   1   1  20 5.06138     2084
   1   1   1  11   0   0   0   2   1   1  26 4.37502     2085
   1   1   1  11   0   0   0   2   1   1  27 4.70647     2086
   1   1   1  11   0   0   0   2   1   1  28 5.76318     2087
   1   1   1  11   0   0   0   2   2   1   9 6.16207     2088
   1   1   1  11   0   0   0   2   2   1  10 6.29945     2089
   1   1   1  11   0   0   0   2   2   1  11 5.55615     2090
   1   1   1  11   0   0   0   2   2   1  12 6.21499     2091
   1   1   1  11   0   0   0   2   2   1  16 4.70540     2092
   1   1   1  11   0   0   0   2   2   1  17 5.99465     2093
   1   1   1  11   0   0   0   2   2   1  20 5.04166     2094
   1   1   1  11   0   0   0   3   1   1  12 6.94513     2095
   1   1   1  11   0   0   0   3   1   1  13 6.77640     2096
   1   1   1  11   0   0   0   3   1   1  17 6.25824     2097
   1   1   1  11   0   0   0   3   1   1  18 5.92979     2098
   1   1   1  11   0   0   0   3   2   1  12 6.94514     2099
   1   1   1  11   0   0   0   3   2   1  13 6.77641     2100
   1   1   1  11   0   0   0   3   2   1  17 6.25825     2101
   1   1   1  11   0   0   0   3   2   1  18 5.92980     2102
   1   1   1  11   0   0   0   4   1   1   3 6.81524     2103
   1   1   1  11   0   0   0   4   1   1   5 6.58534     2104
   1   1   1  11   0   0   0   4   1   1   6 5.33725     2105
   1   1   1  11   0   0   0   4   1   1   7 4.74834     2106
   1   1   1  11   0   0   0   4   1   1   8 5.59140     2107
   1   1   1  11   0   0   0   4   1   1   9 5.58861     2108
   1   1   1  11   0   0   0   4   1   1  10 6.78726     2109
   1   1   1  11   0   0   0   4   1   1  16 6.76721     2110
   1   1   1  11   0   0   0   4   1   1  20 4.62075     2111
   1   1   1  11   0   0   0   4   1   1  24 5.08250     2112
   1   1   1  11   0   0   0   4   1   1  25 3.90334     2113
   1   1   1  11   0   0   0   4   1   1  26 5.13967     2114
   1   1   1  11   0   0   0   4   1   1  27 4.70969     2115
   1   1   1  11   0   0   0   4   1   1  28 3.63480     2116
   1   1   1  11   0   0   0   4   2   1   3 6.81523     2117
   1   1   1  11   0   0   0   4   2   1   5 6.58534     2118
   1   1   1  11   0   0   0   4   2   1   6 5.33724     2119
   1   1   1  11   0   0   0   4   2   1   7 4.74833     2120
   1   1   1  11   0   0   0   4   2   1   8 5.59139     2121
   1   1   1  11   0   0   0   4   2   1   9 5.58861     2122
   1   1   1  11   0   0   0   4   2   1  10 6.78726     2123
   1   1   1  11   0   0   0   4   2   1  16 6.76720     2124
   1   1   1  11   0   0   0   4   2   1  20 4.55822     2125
   1   1   1  11   0   0   0   4   2   1  24 5.08249     2126
   1   1   1  11   0   0   0   4   2   1  25 3.90333     2127
   1   1   1  11   0   0   1   3   1   1   9 6.84401     2128
   1   1   1  11   0   0   1   3   1   1  16 6.74386     2129
   1   1   1  11   0   0   1   3   1   1  20 6.48630     2130
   1   1   1  11   0   0   1   3   1   1  26 6.42466     2131
   1   1   1  11   0   0   1   3   1   1  28 5.75481     2132
   1   1   1  11   0   0   1   3   2   1   9 6.84401     2133
   1   1   1  11   0   0   1   3   2   1  16 6.74386     2134
   1   1   1  11   0   0   1   3   2   1  20 6.45225     2135
   1   1   1  11   0   0   1   4   1   1  12 6.71524     2136
   1   1   1  11   0   0   1   4   1   1  13 6.86416     2137
   1   1   1  11   0   0   1   4   1   1  17 6.44287     2138
   1   1   1  11   0   0   1   4   1   1  18 6.72407     2139
   1   1   1  11   0   0   1   4   2   1  12 6.71525     2140
   1   1   1  11   0   0   1   4   2   1  13 6.86417     2141
   1   1   1  11   0   0   1   4   2   1  17 6.44289     2142
   1   1   1  11   0   0   1   4   2   1  18 6.72408     2143
   1   1   1  11   0   1   1   4   1   1  18 6.66131     2144
   1   1   1  11   0   1   1   4   2   1  18 6.66130     2145
   1   1   1  11   1  -1   0   2   1   1   2 5.10873     2146
   1   1   1  11   1  -1   0   2   1   1   3 6.19873     2147
   1   1   1  11   1  -1   0   2   1   1   4 6.31505     2148
   1   1   1  11   1  -1   0   2   1   1  10 6.96291     2149
   1   1   1  11   1  -1   0   2   1   1  13 5.91691     2150
   1   1   1  11   1  -1   0   2   1   1  14 4.94454     2151
   1   1   1  11   1  -1   0   2   1   1  15 5.54628     2152
   1   1   1  11   1  -1   0   2   1   1  18 5.84687     2153
   1   1   1  11   1  -1   0   2   1   1  19 3.91217     2154
   1   1   1  11   1  -1   0   2   1   1  21 3.55382     2155
   1   1   1  11   1  -1   0   2   1   1  22 5.55321     2156
   1   1   1  11   1  -1   0   2   2   1   2 5.10873     2157
   1   1   1  11   1  -1   0   2   2   1   3 6.19873     2158
   1   1   1  11   1  -1   0   2   2   1   4 6.31505     2159
   1   1   1  11   1  -1   0   2   2   1  10 6.96292     2160
   1   1   1  11   1  -1   0   2   2   1  13 5.91692     2161
   1   1   1  11   1  -1   0   2   2   1  14 4.94455     2162
   1   1   1  11   1  -1   0   2   2   1  15 5.54629     2163
   1   1   1  11   1  -1   0   2   2   1  18 5.84687     2164
   1   1   1  11   1  -1   0   2   2   1  19 3.91217     2165
   1   1   1  11   1  -1   0   2   2   1  21 3.62081     2166
   1   1   1  11   1  -1   0   2   2   1  22 5.55321     2167
   1   1   1  11   1  -1   0   2   2   1  26 3.69176     2168
   1   1   1  11   1  -1   0   2   2   1  27 3.57917     2169
   1   1   1  11   1  -1   0   2   2   1  28 2.94602     2170
   1   1   1  11   1  -1   1   3   1   1   5 6.89868     2171
   1   1   1  11   1  -1   1   3   1   1   6 6.06794     2172
   1   1   1  11   1  -1   1   3   1   1   7 6.58209     2173
   1   1   1  11   1  -1   1   3   1   1  23 6.81923     2174
   1   1   1  11   1  -1   1   3   1   1  24 5.23280     2175
   1   1   1  11   1  -1   1   3   1   1  25 6.23825     2176
   1   1   1  11   1  -1   1   3   2   1   5 6.89867     2177
   1   1   1  11   1  -1   1   3   2   1   6 6.06793     2178
   1   1   1  11   1  -1   1   3   2   1   7 6.58209     2179
   1   1   1  11   1  -1   1   3   2   1  23 6.81922     2180
   1   1   1  11   1  -1   1   3   2   1  24 5.23279     2181
   1   1   1  11   1  -1   1   3   2   1  25 6.23824     2182
   1   1   1  11   1   0   0   2   1   1   2 6.50801     2183
   1   1   1  11   1   0   0   2   1   1   3 6.13525     2184
   1   1   1  11   1   0   0   2   1   1   4 6.21676     2185
   1   1   1  11   1   0   0   2   1   1   5 6.32540     2186
   1   1   1  11   1   0   0   2   1   1   6 6.33754     2187
   1   1   1  11   1   0   0   2   1   1   7 6.25230     2188
   1   1   1  11   1   0   0   2   1   1   8 6.15554     2189
   1   1   1  11   1   0   0   2   1   1   9 6.54496     2190
   1   1   1  11   1   0   0   2   1   1  10 6.90232     2191
   1   1   1  11   1   0   0   2   1   1  15 6.89523     2192
   1   1   1  11   1   0   0   2   1   1  22 6.52231     2193
   1   1   1  11   1   0   0   2   1   1  23 6.72006     2194
   1   1   1  11   1   0   0   2   1   1  24 6.73144     2195
   1   1   1  11   1   0   0   2   1   1  25 6.58744     2196
   1   1   1  11   1   0   0   2   1   1  27 6.42897     2197
   1   1   1  11   1   0   0   2   2   1   2 6.50802     2198
   1   1   1  11   1   0   0   2   2   1   3 6.13526     2199
   1   1   1  11   1   0   0   2   2   1   4 6.21677     2200
   1   1   1  11   1   0   0   2   2   1   5 6.32541     2201
   1   1   1  11   1   0   0   2   2   1   6 6.33755     2202
   1   1   1  11   1   0   0   2   2   1   7 6.25231     2203
   1   1   1  11   1   0   0   2   2   1   8 6.15554     2204
   1   1   1  11   1   0   0   2   2   1   9 6.54496     2205
   1   1   1  11   1   0   0   2   2   1  10 6.90232     2206
   1   1   1  11   1   0   0   2   2   1  15 6.89523     2207
   1   1   1  11   1   0   0   2   2   1  22 6.52233     2208
   1   1   1  11   1   0   0   2   2   1  23 6.72007     2209
   1   1   1  11   1   0   0   2   2   1  24 6.73146     2210
   1   1   1  11   1   0   0   2   2   1  25 6.58745     2211
   1   1   1  11   1   0   0   2   2   1  27 6.55714     2212
   1   1   1  11   1   0   1   3   1   1   2 5.34764     2213
   1   1   1  11   1   0   1   3   1   1   3 4.68855     2214
   1   1   1  11   1   0   1   3   1   1   4 3.87842     2215
   1   1   1  11   1   0   1   3   1   1   5 3.80424     2216
   1   1   1  11   1   0   1   3   1   1   6 4.56261     2217
   1   1   1  11   1   0   1   3   1   1   7 5.25302     2218
   1   1   1  11   1   0   1   3   1   1   8 5.33937     2219
   1   1   1  11   1   0   1   3   1   1   9 6.43161     2220
   1   1   1  11   1   0   1   3   1   1  10 6.91651     2221
   1   1   1  11   1   0   1   3   1   1  15 6.44353     2222
   1   1   1  11   1   0   1   3   1   1  21 5.35093     2223
   1   1   1  11   1   0   1   3   1   1  22 3.79212     2224
   1   1   1  11   1   0   1   3   1   1  23 3.64222     2225
   1   1   1  11   1   0   1   3   1   1  24 4.95271     2226
   1   1   1  11   1   0   1   3   1   1  25 6.05049     2227
   1   1   1  11   1   0   1   3   2   1   2 5.34762     2228
   1   1   1  11   1   0   1   3   2   1   3 4.68854     2229
   1   1   1  11   1   0   1   3   2   1   4 3.87841     2230
   1   1   1  11   1   0   1   3   2   1   5 3.80423     2231
   1   1   1  11   1   0   1   3   2   1   6 4.56261     2232
   1   1   1  11   1   0   1   3   2   1   7 5.25303     2233
   1   1   1  11   1   0   1   3   2   1   8 5.33937     2234
   1   1   1  11   1   0   1   3   2   1   9 6.43161     2235
   1   1   1  11   1   0   1   3   2   1  10 6.91651     2236
   1   1   1  11   1   0   1   3   2   1  15 6.44352     2237
   1   1   1  11   1   0   1   3   2   1  21 5.31094     2238
   1   1   1  11   1   0   1   3   2   1  22 3.79210     2239
   1   1   1  11   1   0   1   3   2   1  23 3.64221     2240
   1   1   1  11   1   0   1   3   2   1  24 4.95272     2241
   1   1   1  11   1   0   1   3   2   1  25 6.05050     2242
   1   1   1  11   1   0   1   3   2   1  26 4.43670     2243
   1   1   1  11   1   0   1   3   2   1  27 6.01763     2244
   1   1   1  11   1   0   1   3   2   1  28 5.51417     2245
   1   1   1  12  -1   0   0   1   1   1   2 5.01585     2246
   1   1   1  12  -1   0   0   1   1   1   3 5.46777     2247
   1   1   1  12  -1   0   0   1   1   1   4 5.09674     2248
   1   1   1  12  -1   0   0   1   1   1   5 6.06077     2249
   1   1   1  12  -1   0   0   1   1   1   8 6.72513     2250
   1   1   1  12  -1   0   0   1   1   1  14 6.05454     2251
   1   1   1  12  -1   0   0   1   1   1  15 5.93372     2252
   1   1   1  12  -1   0   0   1   1   1  19 5.42314     2253
   1   1   1  12  -1   0   0   1   1   1  21 3.81040     2254
   1   1   1  12  -1   0   0   1   1   1  22 4.31022     2255
   1   1   1  12  -1   0   0   1   1   1  23 6.15306     2256
   1   1   1  12  -1   0   0   1   2   1   2 5.01586     2257
   1   1   1  12  -1   0   0   1   2   1   3 5.46777     2258
   1   1   1  12  -1   0   0   1   2   1   4 5.09674     2259
   1   1   1  12  -1   0   0   1   2   1   5 6.06077     2260
   1   1   1  12  -1   0   0   1   2   1   8 6.72513     2261
   1   1   1  12  -1   0   0   1   2   1  14 6.05454     2262
   1   1   1  12  -1   0   0   1   2   1  15 5.93372     2263
   1   1   1  12  -1   0   0   1   2   1  19 5.42314     2264
   1   1   1  12  -1   0   0   1   2   1  21 3.87386     2265
   1   1   1  12  -1   0   0   1   2   1  22 4.31022     2266
   1   1   1  12  -1   0   0   1   2   1  23 6.15306     2267
   1   1   1  12  -1   0   0   1   2   1  26 3.98207     2268
   1   1   1  12  -1   0   0   1   2   1  27 3.16874     2269
   1   1   1  12  -1   0   0   1   2   1  28 4.36251     2270
   1   1   1  12  -1   0   0   4   1   1   3 6.17294     2271
   1   1   1  12  -1   0   0   4   1   1   4 5.07066     2272
   1   1   1  12  -1   0   0   4   1   1   5 3.87331     2273
   1   1   1  12  -1   0   0   4   1   1   6 4.00482     2274
   1   1   1  12  -1   0   0   4   1   1   7 5.26314     2275
   1   1   1  12  -1   0   0   4   1   1   8 6.26610     2276
   1   1   1  12  -1   0   0   4   1   1  22 5.37915     2277
   1   1   1  12  -1   0   0   4   1   1  23 3.14826     2278
   1   1   1  12  -1   0   0   4   1   1  24 3.41791     2279
   1   1   1  12  -1   0   0   4   1   1  25 5.69428     2280
   1   1   1  12  -1   0   0   4   2   1   3 6.17294     2281
   1   1   1  12  -1   0   0   4   2   1   4 5.07066     2282
   1   1   1  12  -1   0   0   4   2   1   5 3.87331     2283
   1   1   1  12  -1   0   0   4   2   1   6 4.00483     2284
   1   1   1  12  -1   0   0   4   2   1   7 5.26315     2285
   1   1   1  12  -1   0   0   4   2   1   8 6.26611     2286
   1   1   1  12  -1   0   0   4   2   1  22 5.37915     2287
   1   1   1  12  -1   0   0   4   2   1  23 3.14826     2288
   1   1   1  12  -1   0   0   4   2   1  24 3.41792     2289
   1   1   1  12  -1   0   0   4   2   1  25 5.69430     2290
   1   1   1  12  -1   1   0   4   1   1  22 6.85487     2291
   1   1   1  12  -1   1   0   4   2   1  22 6.85488     2292
   1   1   1  12  -1   1   0   4   2   1  26 6.44126     2293
   1   1   1  12   0  -1   0   2   1   1  10 6.81250     2294
   1   1   1  12   0  -1   0   2   1   1  11 6.21499     2295
   1   1   1  12   0  -1   0   2   1   1  12 5.49605     2296
   1   1   1  12   0  -1   0   2   1   1  13 5.36305     2297
   1   1   1  12   0  -1   0   2   1   1  14 5.98415     2298
   1   1   1  12   0  -1   0   2   1   1  15 6.69289     2299
   1   1   1  12   0  -1   0   2   1   1  16 6.61175     2300
   1   1   1  12   0  -1   0   2   1   1  17 5.36295     2301
   1   1   1  12   0  -1   0   2   1   1  18 5.11102     2302
   1   1   1  12   0  -1   0   2   1   1  19 6.22905     2303
   1   1   1  12   0  -1   0   2   2   1  10 6.81250     2304
   1   1   1  12   0  -1   0   2   2   1  11 6.21499     2305
   1   1   1  12   0  -1   0   2   2   1  12 5.49605     2306
   1   1   1  12   0  -1   0   2   2   1  13 5.36305     2307
   1   1   1  12   0  -1   0   2   2   1  14 5.98415     2308
   1   1   1  12   0  -1   0   2   2   1  15 6.69288     2309
   1   1   1  12   0  -1   0   2   2   1  16 6.61176     2310
   1   1   1  12   0  -1   0   2   2   1  17 5.36296     2311
   1   1   1  12   0  -1   0   2   2   1  18 5.11102     2312
   1   1   1  12   0  -1   0   2   2   1  19 6.22905     2313
   1   1   1  12   0   0   0   2   1   1   7 6.57983     2314
   1   1   1  12   0   0   0   2   1   1   8 6.26476     2315
   1   1   1  12   0   0   0   2   1   1   9 5.10771     2316
   1   1   1  12   0   0   0   2   1   1  10 5.35077     2317
   1   1   1  12   0   0   0   2   1   1  11 4.65693     2318
   1   1   1  12   0   0   0   2   1   1  12 5.49606     2319
   1   1   1  12   0   0   0   2   1   1  13 6.77912     2320
   1   1   1  12   0   0   0   2   1   1  15 6.68120     2321
   1   1   1  12   0   0   0   2   1   1  16 3.70984     2322
   1   1   1  12   0   0   0   2   1   1  17 5.37934     2323
   1   1   1  12   0   0   0   2   1   1  20 3.86764     2324
   1   1   1  12   0   0   0   2   1   1  25 5.96342     2325
   1   1   1  12   0   0   0   2   1   1  26 3.13502     2326
   1   1   1  12   0   0   0   2   1   1  27 3.63232     2327
   1   1   1  12   0   0   0   2   1   1  28 4.49259     2328
   1   1   1  12   0   0   0   2   2   1   7 6.57983     2329
   1   1   1  12   0   0   0   2   2   1   8 6.26476     2330
   1   1   1  12   0   0   0   2   2   1   9 5.10771     2331
   1   1   1  12   0   0   0   2   2   1  10 5.35077     2332
   1   1   1  12   0   0   0   2   2   1  11 4.65692     2333
   1   1   1  12   0   0   0   2   2   1  12 5.49605     2334
   1   1   1  12   0   0   0   2   2   1  13 6.77911     2335
   1   1   1  12   0   0   0   2   2   1  15 6.68119     2336
   1   1   1  12   0   0   0   2   2   1  16 3.70984     2337
   1   1   1  12   0   0   0   2   2   1  17 5.37933     2338
   1   1   1  12   0   0   0   2   2   1  20 3.83847     2339
   1   1   1  12   0   0   0   2   2   1  25 5.96343     2340
   1   1   1  12   0   0   0   3   1   1  11 6.94514     2341
   1   1   1  12   0   0   0   3   1   1  12 5.76514     2342
   1   1   1  12   0   0   0   3   1   1  13 5.73397     2343
   1   1   1  12   0   0   0   3   1   1  14 6.88768     2344
   1   1   1  12   0   0   0   3   1   1  17 5.06152     2345
   1   1   1  12   0   0   0   3   1   1  18 5.00588     2346
   1   1   1  12   0   0   0   3   2   1  11 6.94514     2347
   1   1   1  12   0   0   0   3   2   1  12 5.76515     2348
   1   1   1  12   0   0   0   3   2   1  13 5.73398     2349
   1   1   1  12   0   0   0   3   2   1  14 6.88770     2350
   1   1   1  12   0   0   0   3   2   1  17 5.06153     2351
   1   1   1  12   0   0   0   3   2   1  18 5.00590     2352
   1   1   1  12   0   0   0   4   1   1   3 6.65922     2353
   1   1   1  12   0   0   0   4   1   1   5 6.63045     2354
   1   1   1  12   0   0   0   4   1   1   6 5.29863     2355
   1   1   1  12   0   0   0   4   1   1   7 4.50910     2356
   1   1   1  12   0   0   0   4   1   1   8 5.30436     2357
   1   1   1  12   0   0   0   4   1   1   9 5.12505     2358
   1   1   1  12   0   0   0   4   1   1  10 6.34589     2359
   1   1   1  12   0   0   0   4   1   1  11 6.71526     2360
   1   1   1  12   0   0   0   4   1   1  16 6.10935     2361
   1   1   1  12   0   0   0   4   1   1  20 3.89377     2362
   1   1   1  12   0   0   0   4   1   1  24 5.10666     2363
   1   1   1  12   0   0   0   4   1   1  25 3.50270     2364
   1   1   1  12   0   0   0   4   1   1  26 4.34509     2365
   1   1   1  12   0   0   0   4   1   1  27 3.78014     2366
   1   1   1  12   0   0   0   4   1   1  28 3.06494     2367
   1   1   1  12   0   0   0   4   2   1   3 6.65921     2368
   1   1   1  12   0   0   0   4   2   1   5 6.63044     2369
   1   1   1  12   0   0   0   4   2   1   6 5.29862     2370
   1   1   1  12   0   0   0   4   2   1   7 4.50909     2371
   1   1   1  12   0   0   0   4   2   1   8 5.30435     2372
   1   1   1  12   0   0   0   4   2   1   9 5.12504     2373
   1   1   1  12   0   0   0   4   2   1  10 6.34589     2374
   1   1   1  12   0   0   0   4   2   1  11 6.71526     2375
   1   1   1  12   0   0   0   4   2   1  16 6.10935     2376
   1   1   1  12   0   0   0   4   2   1  20 3.82270     2377
   1   1   1  12   0   0   0   4   2   1  24 5.10665     2378
   1   1   1  12   0   0   0   4   2   1  25 3.50269     2379
   1   1   1  12   0   0   1   3   1   1  20 6.56691     2380
   1   1   1  12   0   0   1   3   1   1  26 6.63096     2381
   1   1   1  12   0   0   1   3   1   1  28 5.69191     2382
   1   1   1  12   0   0   1   3   2   1  20 6.52250     2383
   1   1   1  12   0   1   0   1   1   1  27 6.94801     2384
   1   1   1  12   0   1   1   4   1   1  18 6.87670     2385
   1   1   1  12   0   1   1   4   2   1  18 6.87670     2386
   1   1   1  12   1  -1   0   2   1   1   2 5.63033     2387
   1   1   1  12   1  -1   0   2   1   1   3 6.56947     2388
   1   1   1  12   1  -1   0   2   1   1   4 6.53884     2389
   1   1   1  12   1  -1   0   2   1   1  13 6.71164     2390
   1   1   1  12   1  -1   0   2   1   1  14 5.72067     2391
   1   1   1  12   1  -1   0   2   1   1  15 6.17948     2392
   1   1   1  12   1  -1   0   2   1   1  18 6.69596     2393
   1   1   1  12   1  -1   0   2   1   1  19 4.77788     2394
   1   1   1  12   1  -1   0   2   1   1  21 4.12716     2395
   1   1   1  12   1  -1   0   2   1   1  22 5.74100     2396
   1   1   1  12   1  -1   0   2   2   1   2 5.63033     2397
   1   1   1  12   1  -1   0   2   2   1   3 6.56947     2398
   1   1   1  12   1  -1   0   2   2   1   4 6.53884     2399
   1   1   1  12   1  -1   0   2   2   1  13 6.71165     2400
   1   1   1  12   1  -1   0   2   2   1  14 5.72068     2401
   1   1   1  12   1  -1   0   2   2   1  15 6.17948     2402
   1   1   1  12   1  -1   0   2   2   1  18 6.69597     2403
   1   1   1  12   1  -1   0   2   2   1  19 4.77788     2404
   1   1   1  12   1  -1   0   2   2   1  21 4.18190     2405
   1   1   1  12   1  -1   0   2   2   1  22 5.74099     2406
   1   1   1  12   1  -1   0   2   2   1  26 3.94912     2407
   1   1   1  12   1  -1   0   2   2   1  27 4.36557     2408
   1   1   1  12   1  -1   0   2   2   1  28 3.46752     2409
   1   1   1  12   1  -1   1   3   1   1  24 6.30696     2410
   1   1   1  12   1  -1   1   3   2   1  24 6.30696     2411
   1   1   1  12   1   0   0   2   1   1   2 5.56924     2412
   1   1   1  12   1   0   0   2   1   1   3 5.04340     2413
   1   1   1  12   1   0   0   2   1   1   4 4.95838     2414
   1   1   1  12   1   0   0   2   1   1   5 5.01068     2415
   1   1   1  12   1   0   0   2   1   1   6 5.12519     2416
   1   1   1  12   1   0   0   2   1   1   7 5.19598     2417
   1   1   1  12   1   0   0   2   1   1   8 5.16821     2418
   1   1   1  12   1   0   0   2   1   1   9 5.78751     2419
   1   1   1  12   1   0   0   2   1   1  10 6.25546     2420
   1   1   1  12   1   0   0   2   1   1  15 6.16682     2421
   1   1   1  12   1   0   0   2   1   1  20 6.48570     2422
   1   1   1  12   1   0   0   2   1   1  21 6.09891     2423
   1   1   1  12   1   0   0   2   1   1  22 5.26520     2424
   1   1   1  12   1   0   0   2   1   1  23 5.36721     2425
   1   1   1  12   1   0   0   2   1   1  24 5.54603     2426
   1   1   1  12   1   0   0   2   1   1  25 5.66161     2427
   1   1   1  12   1   0   0   2   1   1  27 5.90895     2428
   1   1   1  12   1   0   0   2   2   1   2 5.56925     2429
   1   1   1  12   1   0   0   2   2   1   3 5.04341     2430
   1   1   1  12   1   0   0   2   2   1   4 4.95839     2431
   1   1   1  12   1   0   0   2   2   1   5 5.01069     2432
   1   1   1  12   1   0   0   2   2   1   6 5.12520     2433
   1   1   1  12   1   0   0   2   2   1   7 5.19599     2434
   1   1   1  12   1   0   0   2   2   1   8 5.16822     2435
   1   1   1  12   1   0   0   2   2   1   9 5.78751     2436
   1   1   1  12   1   0   0   2   2   1  10 6.25547     2437
   1   1   1  12   1   0   0   2   2   1  15 6.16682     2438
   1   1   1  12   1   0   0   2   2   1  20 6.54332     2439
   1   1   1  12   1   0   0   2   2   1  21 6.08173     2440
   1   1   1  12   1   0   0   2   2   1  22 5.26521     2441
   1   1   1  12   1   0   0   2   2   1  23 5.36723     2442
   1   1   1  12   1   0   0   2   2   1  24 5.54604     2443
   1   1   1  12   1   0   0   2   2   1  25 5.66162     2444
   1   1   1  12   1   0   0   2   2   1  26 6.39968     2445
   1   1   1  12   1   0   0   2   2   1  27 5.68371     2446
   1   1   1  12   1   0   0   2   2   1  28 6.99376     2447
   1   1   1  12   1   0   0   3   1   1  19 6.73993     2448
   1   1   1  12   1   0   0   3   2   1  19 6.73995     2449
   1   1   1  12   1   0   0   3   2   1  27 6.68690     2450
   1   1   1  12   1   0   1   3   1   1   2 6.19969     2451
   1   1   1  12   1   0   1   3   1   1   3 5.29145     2452
   1   1   1  12   1   0   1   3   1   1   4 4.37312     2453
   1   1   1  12   1   0   1   3   1   1   5 3.85055     2454
   1   1   1  12   1   0   1   3   1   1   6 4.38302     2455
   1   1   1  12   1   0   1   3   1   1   7 5.26729     2456
   1   1   1  12   1   0   1   3   1   1   8 5.70345     2457
   1   1   1  12   1   0   1   3   1   1   9 6.87277     2458
   1   1   1  12   1   0   1   3   1   1  21 6.39441     2459
   1   1   1  12   1   0   1   3   1   1  22 4.46645     2460
   1   1   1  12   1   0   1   3   1   1  23 3.49170     2461
   1   1   1  12   1   0   1   3   1   1  24 4.47055     2462
   1   1   1  12   1   0   1   3   1   1  25 5.93157     2463
   1   1   1  12   1   0   1   3   2   1   2 6.19967     2464
   1   1   1  12   1   0   1   3   2   1   3 5.29144     2465
   1   1   1  12   1   0   1   3   2   1   4 4.37311     2466
   1   1   1  12   1   0   1   3   2   1   5 3.85053     2467
   1   1   1  12   1   0   1   3   2   1   6 4.38302     2468
   1   1   1  12   1   0   1   3   2   1   7 5.26729     2469
   1   1   1  12   1   0   1   3   2   1   8 5.70345     2470
   1   1   1  12   1   0   1   3   2   1   9 6.87277     2471
   1   1   1  12   1   0   1   3   2   1  21 6.34989     2472
   1   1   1  12   1   0   1   3   2   1  22 4.46642     2473
   1   1   1  12   1   0   1   3   2   1  23 3.49169     2474
   1   1   1  12   1   0   1   3   2   1  24 4.47055     2475
   1   1   1  12   1   0   1   3   2   1  25 5.93158     2476
   1   1   1  12   1   0   1   3   2   1  26 5.51399     2477
   1   1   1  12   1   0   1   3   2   1  28 6.67106     2478
   1   1   1  13  -1   0   0   1   1   1   2 6.17664     2479
   1   1   1  13  -1   0   0   1   1   1   3 6.69199     2480
   1   1   1  13  -1   0   0   1   1   1   4 6.23960     2481
   1   1   1  13  -1   0   0   1   1   1  19 6.27604     2482
   1   1   1  13  -1   0   0   1   1   1  21 4.76619     2483
   1   1   1  13  -1   0   0   1   1   1  22 5.33933     2484
   1   1   1  13  -1   0   0   1   2   1   2 6.17665     2485
   1   1   1  13  -1   0   0   1   2   1   3 6.69199     2486
   1   1   1  13  -1   0   0   1   2   1   4 6.23960     2487
   1   1   1  13  -1   0   0   1   2   1  19 6.27604     2488
   1   1   1  13  -1   0   0   1   2   1  21 4.83961     2489
   1   1   1  13  -1   0   0   1   2   1  22 5.33933     2490
   1   1   1  13  -1   0   0   1   2   1  26 4.82514     2491
   1   1   1  13  -1   0   0   1   2   1  27 4.19886     2492
   1   1   1  13  -1   0   0   1   2   1  28 5.13757     2493
   1   1   1  13  -1   0   0   4   1   1   4 6.04611     2494
   1   1   1  13  -1   0   0   4   1   1   5 4.98421     2495
   1   1   1  13  -1   0   0   4   1   1   6 5.17566     2496
   1   1   1  13  -1   0   0   4   1   1   7 6.35279     2497
   1   1   1  13  -1   0   0   4   1   1  22 6.24740     2498
   1   1   1  13  -1   0   0   4   1   1  23 4.27315     2499
   1   1   1  13  -1   0   0   4   1   1  24 4.64836     2500
   1   1   1  13  -1   0   0   4   1   1  25 6.76345     2501
   1   1   1  13  -1   0   0   4   2   1   4 6.04611     2502
   1   1   1  13  -1   0   0   4   2   1   5 4.98421     2503
   1   1   1  13  -1   0   0   4   2   1   6 5.17566     2504
   1   1   1  13  -1   0   0   4   2   1   7 6.35280     2505
   1   1   1  13  -1   0   0   4   2   1  22 6.24740     2506
   1   1   1  13  -1   0   0   4   2   1  23 4.27315     2507
   1   1   1  13  -1   0   0   4   2   1  24 4.64837     2508
   1   1   1  13  -1   0   0   4   2   1  25 6.76346     2509
   1   1   1  13  -1   1   0   4   1   1  22 6.31583     2510
   1   1   1  13  -1   1   0   4   1   1  23 6.97020     2511
   1   1   1  13  -1   1   0   4   2   1  22 6.31585     2512
   1   1   1  13  -1   1   0   4   2   1  23 6.97021     2513
   1   1   1  13  -1   1   0   4   2   1  26 6.10493     2514
   1   1   1  13  -1   1   0   4   2   1  28 6.96807     2515
   1   1   1  13   0  -1   0   2   1   1  12 6.77911     2516
   1   1   1  13   0  -1   0   2   1   1  13 6.73851     2517
   1   1   1  13   0  -1   0   2   1   1  17 6.55660     2518
   1   1   1  13   0  -1   0   2   1   1  18 6.47339     2519
   1   1   1  13   0  -1   0   2   2   1  12 6.77912     2520
   1   1   1  13   0  -1   0   2   2   1  13 6.73851     2521
   1   1   1  13   0  -1   0   2   2   1  17 6.55660     2522
   1   1   1  13   0  -1   0   2   2   1  18 6.47339     2523
   1   1   1  13   0   0   0   2   1   1   8 6.62987     2524
   1   1   1  13   0   0   0   2   1   1   9 5.36757     2525
   1   1   1  13   0   0   0   2   1   1  10 5.50068     2526
   1   1   1  13   0   0   0   2   1   1  11 4.61162     2527
   1   1   1  13   0   0   0   2   1   1  12 5.36305     2528
   1   1   1  13   0   0   0   2   1   1  13 6.73851     2529
   1   1   1  13   0   0   0   2   1   1  15 6.86813     2530
   1   1   1  13   0   0   0   2   1   1  16 3.55079     2531
   1   1   1  13   0   0   0   2   1   1  17 5.09616     2532
   1   1   1  13   0   0   0   2   1   1  20 4.08116     2533
   1   1   1  13   0   0   0   2   1   1  25 6.38339     2534
   1   1   1  13   0   0   0   2   1   1  26 3.17803     2535
   1   1   1  13   0   0   0   2   1   1  27 4.16296     2536
   1   1   1  13   0   0   0   2   1   1  28 4.52076     2537
   1   1   1  13   0   0   0   2   2   1   8 6.62987     2538
   1   1   1  13   0   0   0   2   2   1   9 5.36757     2539
   1   1   1  13   0   0   0   2   2   1  10 5.50068     2540
   1   1   1  13   0   0   0   2   2   1  11 4.61162     2541
   1   1   1  13   0   0   0   2   2   1  12 5.36304     2542
   1   1   1  13   0   0   0   2   2   1  13 6.73850     2543
   1   1   1  13   0   0   0   2   2   1  15 6.86812     2544
   1   1   1  13   0   0   0   2   2   1  16 3.55078     2545
   1   1   1  13   0   0   0   2   2   1  17 5.09615     2546
   1   1   1  13   0   0   0   2   2   1  20 4.04107     2547
   1   1   1  13   0   0   0   2   2   1  25 6.38339     2548
   1   1   1  13   0   0   0   3   1   1  11 6.77640     2549
   1   1   1  13   0   0   0   3   1   1  12 5.73397     2550
   1   1   1  13   0   0   0   3   1   1  13 6.03669     2551
   1   1   1  13   0   0   0   3   1   1  16 6.86048     2552
   1   1   1  13   0   0   0   3   1   1  17 4.87539     2553
   1   1   1  13   0   0   0   3   1   1  18 5.48799     2554
   1   1   1  13   0   0   0   3   2   1  11 6.77641     2555
   1   1   1  13   0   0   0   3   2   1  12 5.73398     2556
   1   1   1  13   0   0   0   3   2   1  13 6.03670     2557
   1   1   1  13   0   0   0   3   2   1  16 6.86048     2558
   1   1   1  13   0   0   0   3   2   1  17 4.87540     2559
   1   1   1  13   0   0   0   3   2   1  18 5.48800     2560
   1   1   1  13   0   0   0   4   1   1   3 6.34791     2561
   1   1   1  13   0   0   0   4   1   1   4 6.77450     2562
   1   1   1  13   0   0   0   4   1   1   5 6.07458     2563
   1   1   1  13   0   0   0   4   1   1   6 4.68210     2564
   1   1   1  13   0   0   0   4   1   1   7 4.01087     2565
   1   1   1  13   0   0   0   4   1   1   8 5.00306     2566
   1   1   1  13   0   0   0   4   1   1   9 5.01462     2567
   1   1   1  13   0   0   0   4   1   1  10 6.34397     2568
   1   1   1  13   0   0   0   4   1   1  11 6.86417     2569
   1   1   1  13   0   0   0   4   1   1  16 6.33098     2570
   1   1   1  13   0   0   0   4   1   1  20 3.88157     2571
   1   1   1  13   0   0   0   4   1   1  23 6.74892     2572
   1   1   1  13   0   0   0   4   1   1  24 4.37046     2573
   1   1   1  13   0   0   0   4   1   1  25 2.94720     2574
   1   1   1  13   0   0   0   4   1   1  26 4.49562     2575
   1   1   1  13   0   0   0   4   1   1  27 3.42860     2576
   1   1   1  13   0   0   0   4   1   1  28 3.27754     2577
   1   1   1  13   0   0   0   4   2   1   3 6.34791     2578
   1   1   1  13   0   0   0   4   2   1   4 6.77449     2579
   1   1   1  13   0   0   0   4   2   1   5 6.07457     2580
   1   1   1  13   0   0   0   4   2   1   6 4.68209     2581
   1   1   1  13   0   0   0   4   2   1   7 4.01086     2582
   1   1   1  13   0   0   0   4   2   1   8 5.00306     2583
   1   1   1  13   0   0   0   4   2   1   9 5.01462     2584
   1   1   1  13   0   0   0   4   2   1  10 6.34397     2585
   1   1   1  13   0   0   0   4   2   1  11 6.86417     2586
   1   1   1  13   0   0   0   4   2   1  16 6.33098     2587
   1   1   1  13   0   0   0   4   2   1  20 3.82348     2588
   1   1   1  13   0   0   0   4   2   1  23 6.74891     2589
   1   1   1  13   0   0   0   4   2   1  24 4.37045     2590
   1   1   1  13   0   0   0   4   2   1  25 2.94719     2591
   1   1   1  13   0   0   1   3   1   1  20 6.99609     2592
   1   1   1  13   0   0   1   3   1   1  26 6.97598     2593
   1   1   1  13   0   0   1   3   1   1  28 6.11429     2594
   1   1   1  13   0   0   1   3   2   1  20 6.93876     2595
   1   1   1  13   0   1   0   1   1   1  27 6.37480     2596
   1   1   1  13   0   1   1   4   1   1  18 6.77315     2597
   1   1   1  13   0   1   1   4   2   1  18 6.77315     2598
   1   1   1  13   1  -1   0   2   1   1   2 6.04479     2599
   1   1   1  13   1  -1   0   2   1   1  13 6.69247     2600
   1   1   1  13   1  -1   0   2   1   1  14 5.86543     2601
   1   1   1  13   1  -1   0   2   1   1  15 6.40396     2602
   1   1   1  13   1  -1   0   2   1   1  18 6.61181     2603
   1   1   1  13   1  -1   0   2   1   1  19 5.01852     2604
   1   1   1  13   1  -1   0   2   1   1  21 4.79561     2605
   1   1   1  13   1  -1   0   2   1   1  22 6.45452     2606
   1   1   1  13   1  -1   0   2   2   1   2 6.04479     2607
   1   1   1  13   1  -1   0   2   2   1  13 6.69247     2608
   1   1   1  13   1  -1   0   2   2   1  14 5.86543     2609
   1   1   1  13   1  -1   0   2   2   1  15 6.40396     2610
   1   1   1  13   1  -1   0   2   2   1  18 6.61181     2611
   1   1   1  13   1  -1   0   2   2   1  19 5.01852     2612
   1   1   1  13   1  -1   0   2   2   1  21 4.83239     2613
   1   1   1  13   1  -1   0   2   2   1  22 6.45452     2614
   1   1   1  13   1  -1   0   2   2   1  26 4.62792     2615
   1   1   1  13   1  -1   0   2   2   1  27 5.18150     2616
   1   1   1  13   1  -1   0   2   2   1  28 3.98481     2617
   1   1   1  13   1   0   0   1   1   1  17 6.29673     2618
   1   1   1  13   1   0   0   1   2   1  17 6.29673     2619
   1   1   1  13   1   0   0   2   1   1   2 4.31986     2620
   1   1   1  13   1   0   0   2   1   1   3 3.76633     2621
   1   1   1  13   1   0   0   2   1   1   4 3.91717     2622
   1   1   1  13   1   0   0   2   1   1   5 4.10725     2623
   1   1   1  13   1   0   0   2   1   1   6 4.13777     2624
   1   1   1  13   1   0   0   2   1   1   7 3.99291     2625
   1   1   1  13   1   0   0   2   1   1   8 3.81001     2626
   1   1   1  13   1   0   0   2   1   1   9 4.39489     2627
   1   1   1  13   1   0   0   2   1   1  10 4.88419     2628
   1   1   1  13   1   0   0   2   1   1  11 5.91692     2629
   1   1   1  13   1   0   0   2   1   1  12 6.71164     2630
   1   1   1  13   1   0   0   2   1   1  13 6.69247     2631
   1   1   1  13   1   0   0   2   1   1  14 5.86710     2632
   1   1   1  13   1   0   0   2   1   1  15 4.86418     2633
   1   1   1  13   1   0   0   2   1   1  16 6.29746     2634
   1   1   1  13   1   0   0   2   1   1  19 6.20731     2635
   1   1   1  13   1   0   0   2   1   1  20 5.18259     2636
   1   1   1  13   1   0   0   2   1   1  21 5.09577     2637
   1   1   1  13   1   0   0   2   1   1  22 4.38520     2638
   1   1   1  13   1   0   0   2   1   1  23 4.69693     2639
   1   1   1  13   1   0   0   2   1   1  24 4.73664     2640
   1   1   1  13   1   0   0   2   1   1  25 4.50964     2641
   1   1   1  13   1   0   0   2   1   1  26 5.82930     2642
   1   1   1  13   1   0   0   2   1   1  27 4.70637     2643
   1   1   1  13   1   0   0   2   1   1  28 5.79738     2644
   1   1   1  13   1   0   0   2   2   1   2 4.31986     2645
   1   1   1  13   1   0   0   2   2   1   3 3.76634     2646
   1   1   1  13   1   0   0   2   2   1   4 3.91718     2647
   1   1   1  13   1   0   0   2   2   1   5 4.10726     2648
   1   1   1  13   1   0   0   2   2   1   6 4.13778     2649
   1   1   1  13   1   0   0   2   2   1   7 3.99292     2650
   1   1   1  13   1   0   0   2   2   1   8 3.81002     2651
   1   1   1  13   1   0   0   2   2   1   9 4.39490     2652
   1   1   1  13   1   0   0   2   2   1  10 4.88419     2653
   1   1   1  13   1   0   0   2   2   1  11 5.91692     2654
   1   1   1  13   1   0   0   2   2   1  12 6.71164     2655
   1   1   1  13   1   0   0   2   2   1  13 6.69247     2656
   1   1   1  13   1   0   0   2   2   1  14 5.86711     2657
   1   1   1  13   1   0   0   2   2   1  15 4.86418     2658
   1   1   1  13   1   0   0   2   2   1  16 6.29746     2659
   1   1   1  13   1   0   0   2   2   1  19 6.20731     2660
   1   1   1  13   1   0   0   2   2   1  20 5.24492     2661
   1   1   1  13   1   0   0   2   2   1  21 5.06527     2662
   1   1   1  13   1   0   0   2   2   1  22 4.38521     2663
   1   1   1  13   1   0   0   2   2   1  23 4.69694     2664
   1   1   1  13   1   0   0   2   2   1  24 4.73665     2665
   1   1   1  13   1   0   0   2   2   1  25 4.50965     2666
   1   1   1  13   1   0   0   2   2   1  26 5.43910     2667
   1   1   1  13   1   0   0   2   2   1  27 4.78541     2668
   1   1   1  13   1   0   0   2   2   1  28 5.96435     2669
   1   1   1  13   1   0   0   3   1   1  13 6.79437     2670
   1   1   1  13   1   0   0   3   1   1  14 6.57990     2671
   1   1   1  13   1   0   0   3   1   1  18 6.50150     2672
   1   1   1  13   1   0   0   3   1   1  19 6.08694     2673
   1   1   1  13   1   0   0   3   1   1  21 6.95006     2674
   1   1   1  13   1   0   0   3   2   1  13 6.79438     2675
   1   1   1  13   1   0   0   3   2   1  14 6.57991     2676
   1   1   1  13   1   0   0   3   2   1  18 6.50150     2677
   1   1   1  13   1   0   0   3   2   1  19 6.08696     2678
   1   1   1  13   1   0   0   3   2   1  21 6.99899     2679
   1   1   1  13   1   0   0   3   2   1  27 6.22315     2680
   1   1   1  13   1   0   1   3   1   1   2 6.30974     2681
   1   1   1  13   1   0   1   3   1   1   3 5.24234     2682
   1   1   1  13   1   0   1   3   1   1   4 4.53179     2683
   1   1   1  13   1   0   1   3   1   1   5 3.78335     2684
   1   1   1  13   1   0   1   3   1   1   6 3.84400     2685
   1   1   1  13   1   0   1   3   1   1   7 4.62096     2686
   1   1   1  13   1   0   1   3   1   1   8 5.29161     2687
   1   1   1  13   1   0   1   3   1   1   9 6.38208     2688
   1   1   1  13   1   0   1   3   1   1  20 6.98631     2689
   1   1   1  13   1   0   1   3   1   1  21 6.86002     2690
   1   1   1  13   1   0   1   3   1   1  22 4.93838     2691
   1   1   1  13   1   0   1   3   1   1  23 3.63197     2692
   1   1   1  13   1   0   1   3   1   1  24 3.74974     2693
   1   1   1  13   1   0   1   3   1   1  25 5.07623     2694
   1   1   1  13   1   0   1   3   1   1  28 6.34165     2695
   1   1   1  13   1   0   1   3   2   1   2 6.30972     2696
   1   1   1  13   1   0   1   3   2   1   3 5.24233     2697
   1   1   1  13   1   0   1   3   2   1   4 4.53177     2698
   1   1   1  13   1   0   1   3   2   1   5 3.78334     2699
   1   1   1  13   1   0   1   3   2   1   6 3.84399     2700
   1   1   1  13   1   0   1   3   2   1   7 4.62096     2701
   1   1   1  13   1   0   1   3   2   1   8 5.29161     2702
   1   1   1  13   1   0   1   3   2   1   9 6.38208     2703
   1   1   1  13   1   0   1   3   2   1  20 6.99893     2704
   1   1   1  13   1   0   1   3   2   1  21 6.80257     2705
   1   1   1  13   1   0   1   3   2   1  22 4.93835     2706
   1   1   1  13   1   0   1   3   2   1  23 3.63195     2707
   1   1   1  13   1   0   1   3   2   1  24 3.74974     2708
   1   1   1  13   1   0   1   3   2   1  25 5.07624     2709
   1   1   1  13   1   0   1   3   2   1  26 6.11129     2710
   1   1   1  14  -1   0   0   1   1   1   4 6.70004     2711
   1   1   1  14  -1   0   0   1   1   1  21 5.66714     2712
   1   1   1  14  -1   0   0   1   1   1  22 5.74008     2713
   1   1   1  14  -1   0   0   1   2   1   4 6.70004     2714
   1   1   1  14  -1   0   0   1   2   1  21 5.73561     2715
   1   1   1  14  -1   0   0   1   2   1  22 5.74008     2716
   1   1   1  14  -1   0   0   1   2   1  26 5.51279     2717
   1   1   1  14  -1   0   0   1   2   1  27 5.20159     2718
   1   1   1  14  -1   0   0   1   2   1  28 6.06768     2719
   1   1   1  14  -1   0   0   4   1   1   5 6.04116     2720
   1   1   1  14  -1   0   0   4   1   1   6 6.35379     2721
   1   1   1  14  -1   0   0   4   1   1  23 5.19479     2722
   1   1   1  14  -1   0   0   4   1   1  24 5.80808     2723
   1   1   1  14  -1   0   0   4   2   1   5 6.04116     2724
   1   1   1  14  -1   0   0   4   2   1   6 6.35380     2725
   1   1   1  14  -1   0   0   4   2   1  23 5.19479     2726
   1   1   1  14  -1   0   0   4   2   1  24 5.80809     2727
   1   1   1  14   0  -1   0   2   1   1  17 6.86489     2728
   1   1   1  14   0  -1   0   2   2   1  17 6.86490     2729
   1   1   1  14   0   0   0   2   1   1   9 6.58848     2730
   1   1   1  14   0   0   0   2   1   1  10 6.55444     2731
   1   1   1  14   0   0   0   2   1   1  11 5.48394     2732
   1   1   1  14   0   0   0   2   1   1  12 5.98415     2733
   1   1   1  14   0   0   0   2   1   1  16 4.45682     2734
   1   1   1  14   0   0   0   2   1   1  17 5.48533     2735
   1   1   1  14   0   0   0   2   1   1  20 5.38407     2736
   1   1   1  14   0   0   0   2   1   1  26 4.43559     2737
   1   1   1  14   0   0   0   2   1   1  27 5.51124     2738
   1   1   1  14   0   0   0   2   1   1  28 5.80483     2739
   1   1   1  14   0   0   0   2   2   1   9 6.58848     2740
   1   1   1  14   0   0   0   2   2   1  10 6.55444     2741
   1   1   1  14   0   0   0   2   2   1  11 5.48393     2742
   1   1   1  14   0   0   0   2   2   1  12 5.98415     2743
   1   1   1  14   0   0   0   2   2   1  16 4.45682     2744
   1   1   1  14   0   0   0   2   2   1  17 5.48532     2745
   1   1   1  14   0   0   0   2   2   1  20 5.34666     2746
   1   1   1  14   0   0   0   3   1   1  12 6.88768     2747
   1   1   1  14   0   0   0   3   1   1  17 5.94991     2748
   1   1   1  14   0   0   0   3   1   1  18 6.72068     2749
   1   1   1  14   0   0   0   3   2   1  12 6.88769     2750
   1   1   1  14   0   0   0   3   2   1  17 5.94992     2751
   1   1   1  14   0   0   0   3   2   1  18 6.72069     2752
   1   1   1  14   0   0   0   4   1   1   3 6.18427     2753
   1   1   1  14   0   0   0   4   1   1   4 6.32410     2754
   1   1   1  14   0   0   0   4   1   1   5 5.40240     2755
   1   1   1  14   0   0   0   4   1   1   6 4.01715     2756
   1   1   1  14   0   0   0   4   1   1   7 3.74151     2757
   1   1   1  14   0   0   0   4   1   1   8 4.99631     2758
   1   1   1  14   0   0   0   4   1   1   9 5.37465     2759
   1   1   1  14   0   0   0   4   1   1  10 6.77352     2760
   1   1   1  14   0   0   0   4   1   1  20 4.59043     2761
   1   1   1  14   0   0   0   4   1   1  23 5.90813     2762
   1   1   1  14   0   0   0   4   1   1  24 3.44377     2763
   1   1   1  14   0   0   0   4   1   1  25 2.83263     2764
   1   1   1  14   0   0   0   4   1   1  26 5.38273     2765
   1   1   1  14   0   0   0   4   1   1  27 4.12910     2766
   1   1   1  14   0   0   0   4   1   1  28 3.97760     2767
   1   1   1  14   0   0   0   4   2   1   3 6.18427     2768
   1   1   1  14   0   0   0   4   2   1   4 6.32409     2769
   1   1   1  14   0   0   0   4   2   1   5 5.40239     2770
   1   1   1  14   0   0   0   4   2   1   6 4.01714     2771
   1   1   1  14   0   0   0   4   2   1   7 3.74151     2772
   1   1   1  14   0   0   0   4   2   1   8 4.99630     2773
   1   1   1  14   0   0   0   4   2   1   9 5.37465     2774
   1   1   1  14   0   0   0   4   2   1  10 6.77352     2775
   1   1   1  14   0   0   0   4   2   1  20 4.54976     2776
   1   1   1  14   0   0   0   4   2   1  23 5.90813     2777
   1   1   1  14   0   0   0   4   2   1  24 3.44376     2778
   1   1   1  14   0   0   0   4   2   1  25 2.83263     2779
   1   1   1  14   0   0   1   3   1   1  28 6.56780     2780
   1   1   1  14   0   1   0   1   1   1  27 6.19787     2781
   1   1   1  14   0   1   0   4   2   1  26 6.84860     2782
   1   1   1  14   0   1   0   4   2   1  28 6.91866     2783
   1   1   1  14   0   1   1   4   1   1  18 6.45394     2784
   1   1   1  14   0   1   1   4   2   1  18 6.45394     2785
   1   1   1  14   1  -1   0   2   1   1   2 5.96981     2786
   1   1   1  14   1  -1   0   2   1   1  13 5.86711     2787
   1   1   1  14   1  -1   0   2   1   1  14 5.26438     2788
   1   1   1  14   1  -1   0   2   1   1  15 6.02411     2789
   1   1   1  14   1  -1   0   2   1   1  18 5.64777     2790
   1   1   1  14   1  -1   0   2   1   1  19 4.46566     2791
   1   1   1  14   1  -1   0   2   1   1  21 4.94343     2792
   1   1   1  14   1  -1   0   2   1   1  22 6.93292     2793
   1   1   1  14   1  -1   0   2   2   1   2 5.96981     2794
   1   1   1  14   1  -1   0   2   2   1  13 5.86711     2795
   1   1   1  14   1  -1   0   2   2   1  14 5.26438     2796
   1   1   1  14   1  -1   0   2   2   1  15 6.02412     2797
   1   1   1  14   1  -1   0   2   2   1  18 5.64777     2798
   1   1   1  14   1  -1   0   2   2   1  19 4.46566     2799
   1   1   1  14   1  -1   0   2   2   1  21 4.97153     2800
   1   1   1  14   1  -1   0   2   2   1  22 6.93291     2801
   1   1   1  14   1  -1   0   2   2   1  26 5.01469     2802
   1   1   1  14   1  -1   0   2   2   1  27 5.31626     2803
   1   1   1  14   1  -1   0   2   2   1  28 4.03640     2804
   1   1   1  14   1   0   0   1   1   1  11 6.42268     2805
   1   1   1  14   1   0   0   1   1   1  12 6.05454     2806
   1   1   1  14   1   0   0   1   1   1  16 5.92798     2807
   1   1   1  14   1   0   0   1   1   1  17 5.19487     2808
   1   1   1  14   1   0   0   1   2   1  11 6.42268     2809
   1   1   1  14   1   0   0   1   2   1  12 6.05454     2810
   1   1   1  14   1   0   0   1   2   1  16 5.92798     2811
   1   1   1  14   1   0   0   1   2   1  17 5.19487     2812
   1   1   1  14   1   0   0   2   1   1   2 4.21196     2813
   1   1   1  14   1   0   0   2   1   1   3 3.89947     2814
   1   1   1  14   1   0   0   2   1   1   4 4.49596     2815
   1   1   1  14   1   0   0   2   1   1   5 4.85324     2816
   1   1   1  14   1   0   0   2   1   1   6 4.67714     2817
   1   1   1  14   1   0   0   2   1   1   7 4.12327     2818
   1   1   1  14   1   0   0   2   1   1   8 3.68152     2819
   1   1   1  14   1   0   0   2   1   1   9 3.81372     2820
   1   1   1  14   1   0   0   2   1   1  10 4.14615     2821
   1   1   1  14   1   0   0   2   1   1  11 4.94454     2822
   1   1   1  14   1   0   0   2   1   1  12 5.72067     2823
   1   1   1  14   1   0   0   2   1   1  13 5.86542     2824
   1   1   1  14   1   0   0   2   1   1  14 5.26438     2825
   1   1   1  14   1   0   0   2   1   1  15 4.34968     2826
   1   1   1  14   1   0   0   2   1   1  16 5.24836     2827
   1   1   1  14   1   0   0   2   1   1  17 6.50111     2828
   1   1   1  14   1   0   0   2   1   1  18 6.72905     2829
   1   1   1  14   1   0   0   2   1   1  19 5.76780     2830
   1   1   1  14   1   0   0   2   1   1  20 4.45238     2831
   1   1   1  14   1   0   0   2   1   1  21 5.23323     2832
   1   1   1  14   1   0   0   2   1   1  22 5.06110     2833
   1   1   1  14   1   0   0   2   1   1  23 5.62787     2834
   1   1   1  14   1   0   0   2   1   1  24 5.35229     2835
   1   1   1  14   1   0   0   2   1   1  25 4.46866     2836
   1   1   1  14   1   0   0   2   1   1  26 4.91808     2837
   1   1   1  14   1   0   0   2   1   1  27 3.97814     2838
   1   1   1  14   1   0   0   2   1   1  28 5.24409     2839
   1   1   1  14   1   0   0   2   2   1   2 4.21197     2840
   1   1   1  14   1   0   0   2   2   1   3 3.89948     2841
   1   1   1  14   1   0   0   2   2   1   4 4.49597     2842
   1   1   1  14   1   0   0   2   2   1   5 4.85325     2843
   1   1   1  14   1   0   0   2   2   1   6 4.67715     2844
   1   1   1  14   1   0   0   2   2   1   7 4.12328     2845
   1   1   1  14   1   0   0   2   2   1   8 3.68153     2846
   1   1   1  14   1   0   0   2   2   1   9 3.81373     2847
   1   1   1  14   1   0   0   2   2   1  10 4.14616     2848
   1   1   1  14   1   0   0   2   2   1  11 4.94454     2849
   1   1   1  14   1   0   0   2   2   1  12 5.72067     2850
   1   1   1  14   1   0   0   2   2   1  13 5.86542     2851
   1   1   1  14   1   0   0   2   2   1  14 5.26438     2852
   1   1   1  14   1   0   0   2   2   1  15 4.34968     2853
   1   1   1  14   1   0   0   2   2   1  16 5.24836     2854
   1   1   1  14   1   0   0   2   2   1  17 6.50111     2855
   1   1   1  14   1   0   0   2   2   1  18 6.72905     2856
   1   1   1  14   1   0   0   2   2   1  19 5.76780     2857
   1   1   1  14   1   0   0   2   2   1  20 4.51639     2858
   1   1   1  14   1   0   0   2   2   1  21 5.19628     2859
   1   1   1  14   1   0   0   2   2   1  22 5.06110     2860
   1   1   1  14   1   0   0   2   2   1  23 5.62788     2861
   1   1   1  14   1   0   0   2   2   1  24 5.35230     2862
   1   1   1  14   1   0   0   2   2   1  25 4.46867     2863
   1   1   1  14   1   0   0   2   2   1  26 5.77006     2864
   1   1   1  14   1   0   0   2   2   1  27 4.92901     2865
   1   1   1  14   1   0   0   2   2   1  28 5.99730     2866
   1   1   1  14   1   0   0   3   1   1  13 6.57990     2867
   1   1   1  14   1   0   0   3   1   1  14 6.64103     2868
   1   1   1  14   1   0   0   3   1   1  18 6.16045     2869
   1   1   1  14   1   0   0   3   1   1  19 6.26959     2870
   1   1   1  14   1   0   0   3   2   1  13 6.57990     2871
   1   1   1  14   1   0   0   3   2   1  14 6.64104     2872
   1   1   1  14   1   0   0   3   2   1  18 6.16046     2873
   1   1   1  14   1   0   0   3   2   1  19 6.26961     2874
   1   1   1  14   1   0   0   3   2   1  27 6.90211     2875
   1   1   1  14   1   0   1   3   1   1   2 5.60315     2876
   1   1   1  14   1   0   1   3   1   1   3 4.58284     2877
   1   1   1  14   1   0   1   3   1   1   4 4.23156     2878
   1   1   1  14   1   0   1   3   1   1   5 3.67347     2879
   1   1   1  14   1   0   1   3   1   1   6 3.46748     2880
   1   1   1  14   1   0   1   3   1   1   7 3.86056     2881
   1   1   1  14   1   0   1   3   1   1   8 4.41980     2882
   1   1   1  14   1   0   1   3   1   1   9 5.33446     2883
   1   1   1  14   1   0   1   3   1   1  10 6.23073     2884
   1   1   1  14   1   0   1   3   1   1  15 6.36324     2885
   1   1   1  14   1   0   1   3   1   1  20 5.85362     2886
   1   1   1  14   1   0   1   3   1   1  21 6.40211     2887
   1   1   1  14   1   0   1   3   1   1  22 4.82435     2888
   1   1   1  14   1   0   1   3   1   1  23 3.91140     2889
   1   1   1  14   1   0   1   3   1   1  24 3.57237     2890
   1   1   1  14   1   0   1   3   1   1  25 4.22967     2891
   1   1   1  14   1   0   1   3   1   1  26 6.70105     2892
   1   1   1  14   1   0   1   3   1   1  27 6.24412     2893
   1   1   1  14   1   0   1   3   1   1  28 5.15753     2894
   1   1   1  14   1   0   1   3   2   1   2 5.60313     2895
   1   1   1  14   1   0   1   3   2   1   3 4.58282     2896
   1   1   1  14   1   0   1   3   2   1   4 4.23154     2897
   1   1   1  14   1   0   1   3   2   1   5 3.67345     2898
   1   1   1  14   1   0   1   3   2   1   6 3.46748     2899
   1   1   1  14   1   0   1   3   2   1   7 3.86055     2900
   1   1   1  14   1   0   1   3   2   1   8 4.41980     2901
   1   1   1  14   1   0   1   3   2   1   9 5.33446     2902
   1   1   1  14   1   0   1   3   2   1  10 6.23072     2903
   1   1   1  14   1   0   1   3   2   1  15 6.36323     2904
   1   1   1  14   1   0   1   3   2   1  20 5.86220     2905
   1   1   1  14   1   0   1   3   2   1  21 6.33455     2906
   1   1   1  14   1   0   1   3   2   1  22 4.82433     2907
   1   1   1  14   1   0   1   3   2   1  23 3.91138     2908
   1   1   1  14   1   0   1   3   2   1  24 3.57237     2909
   1   1   1  14   1   0   1   3   2   1  25 4.22967     2910
   1   1   1  14   1   0   1   3   2   1  26 5.79361     2911
   1   1   1  14   1   0   1   3   2   1  28 6.66435     2912
   1   1   1  14   2   0   1   3   1   1   5 6.97428     2913
   1   1   1  14   2   0   1   3   1   1  22 6.92079     2914
   1   1   1  14   2   0   1   3   1   1  23 5.93425     2915
   1   1   1  14   2   0   1   3   2   1   5 6.97428     2916
   1   1   1  14   2   0   1   3   2   1  22 6.92078     2917
   1   1   1  14   2   0   1   3   2   1  23 5.93425     2918
   1   1   1  15  -1   0   0   1   1   1   4 6.17305     2919
   1   1   1  15  -1   0   0   1   1   1   5 6.71440     2920
   1   1   1  15  -1   0   0   1   1   1  21 5.81777     2921
   1   1   1  15  -1   0   0   1   1   1  22 5.25484     2922
   1   1   1  15  -1   0   0   1   1   1  23 6.33838     2923
   1   1   1  15  -1   0   0   1   2   1   4 6.17305     2924
   1   1   1  15  -1   0   0   1   2   1   5 6.71440     2925
   1   1   1  15  -1   0   0   1   2   1  21 5.87256     2926
   1   1   1  15  -1   0   0   1   2   1  22 5.25484     2927
   1   1   1  15  -1   0   0   1   2   1  23 6.33838     2928
   1   1   1  15  -1   0   0   1   2   1  26 5.51805     2929
   1   1   1  15  -1   0   0   1   2   1  27 5.42585     2930
   1   1   1  15  -1   0   0   1   2   1  28 6.36249     2931
   1   1   1  15  -1   0   0   4   1   1   5 6.24641     2932
   1   1   1  15  -1   0   0   4   1   1   6 6.63492     2933
   1   1   1  15  -1   0   0   4   1   1  23 5.28121     2934
   1   1   1  15  -1   0   0   4   1   1  24 6.05426     2935
   1   1   1  15  -1   0   0   4   2   1   5 6.24642     2936
   1   1   1  15  -1   0   0   4   2   1   6 6.63493     2937
   1   1   1  15  -1   0   0   4   2   1  23 5.28122     2938
   1   1   1  15  -1   0   0   4   2   1  24 6.05427     2939
   1   1   1  15   0  -1   0   2   1   1  12 6.68120     2940
   1   1   1  15   0  -1   0   2   1   1  13 6.86813     2941
   1   1   1  15   0  -1   0   2   1   1  17 6.09530     2942
   1   1   1  15   0  -1   0   2   1   1  18 6.44430     2943
   1   1   1  15   0  -1   0   2   2   1  12 6.68120     2944
   1   1   1  15   0  -1   0   2   2   1  13 6.86813     2945
   1   1   1  15   0  -1   0   2   2   1  17 6.09530     2946
   1   1   1  15   0  -1   0   2   2   1  18 6.44430     2947
   1   1   1  15   0   0   0   2   1   1  11 6.31752     2948
   1   1   1  15   0   0   0   2   1   1  12 6.69288     2949
   1   1   1  15   0   0   0   2   1   1  16 5.36627     2950
   1   1   1  15   0   0   0   2   1   1  17 6.12249     2951
   1   1   1  15   0   0   0   2   1   1  20 6.36194     2952
   1   1   1  15   0   0   0   2   1   1  26 5.44583     2953
   1   1   1  15   0   0   0   2   1   1  27 6.33633     2954
   1   1   1  15   0   0   0   2   1   1  28 6.90250     2955
   1   1   1  15   0   0   0   2   2   1  11 6.31752     2956
   1   1   1  15   0   0   0   2   2   1  12 6.69288     2957
   1   1   1  15   0   0   0   2   2   1  16 5.36626     2958
   1   1   1  15   0   0   0   2   2   1  17 6.12249     2959
   1   1   1  15   0   0   0   2   2   1  20 6.33204     2960
   1   1   1  15   0   0   0   4   1   1   3 6.34457     2961
   1   1   1  15   0   0   0   4   1   1   4 6.31867     2962
   1   1   1  15   0   0   0   4   1   1   5 5.30879     2963
   1   1   1  15   0   0   0   4   1   1   6 4.03290     2964
   1   1   1  15   0   0   0   4   1   1   7 4.01767     2965
   1   1   1  15   0   0   0   4   1   1   8 5.30306     2966
   1   1   1  15   0   0   0   4   1   1   9 5.83978     2967
   1   1   1  15   0   0   0   4   1   1  20 5.25892     2968
   1   1   1  15   0   0   0   4   1   1  23 5.68214     2969
   1   1   1  15   0   0   0   4   1   1  24 3.35486     2970
   1   1   1  15   0   0   0   4   1   1  25 3.31815     2971
   1   1   1  15   0   0   0   4   1   1  26 6.08781     2972
   1   1   1  15   0   0   0   4   1   1  27 5.03433     2973
   1   1   1  15   0   0   0   4   1   1  28 4.46577     2974
   1   1   1  15   0   0   0   4   2   1   3 6.34457     2975
   1   1   1  15   0   0   0   4   2   1   4 6.31867     2976
   1   1   1  15   0   0   0   4   2   1   5 5.30878     2977
   1   1   1  15   0   0   0   4   2   1   6 4.03289     2978
   1   1   1  15   0   0   0   4   2   1   7 4.01766     2979
   1   1   1  15   0   0   0   4   2   1   8 5.30306     2980
   1   1   1  15   0   0   0   4   2   1   9 5.83978     2981
   1   1   1  15   0   0   0   4   2   1  20 5.22136     2982
   1   1   1  15   0   0   0   4   2   1  23 5.68214     2983
   1   1   1  15   0   0   0   4   2   1  24 3.35486     2984
   1   1   1  15   0   0   0   4   2   1  25 3.31815     2985
   1   1   1  15   0   0   1   3   1   1  26 6.93823     2986
   1   1   1  15   0   0   1   3   1   1  28 6.64807     2987
   1   1   1  15   0   1   0   1   1   1  27 6.61492     2988
   1   1   1  15   0   1   1   4   1   1  18 6.20795     2989
   1   1   1  15   0   1   1   4   1   1  19 6.71704     2990
   1   1   1  15   0   1   1   4   2   1  18 6.20795     2991
   1   1   1  15   0   1   1   4   2   1  19 6.71704     2992
   1   1   1  15   1  -1   0   2   1   1   2 5.46248     2993
   1   1   1  15   1  -1   0   2   1   1   3 6.73118     2994
   1   1   1  15   1  -1   0   2   1   1  10 6.57396     2995
   1   1   1  15   1  -1   0   2   1   1  11 6.89523     2996
   1   1   1  15   1  -1   0   2   1   1  12 6.16682     2997
   1   1   1  15   1  -1   0   2   1   1  13 4.86418     2998
   1   1   1  15   1  -1   0   2   1   1  14 4.34969     2999
   1   1   1  15   1  -1   0   2   1   1  15 5.33375     3000
   1   1   1  15   1  -1   0   2   1   1  17 6.76783     3001
   1   1   1  15   1  -1   0   2   1   1  18 4.52191     3002
   1   1   1  15   1  -1   0   2   1   1  19 3.46334     3003
   1   1   1  15   1  -1   0   2   1   1  21 4.47027     3004
   1   1   1  15   1  -1   0   2   1   1  22 6.79413     3005
   1   1   1  15   1  -1   0   2   2   1   2 5.46248     3006
   1   1   1  15   1  -1   0   2   2   1   3 6.73118     3007
   1   1   1  15   1  -1   0   2   2   1  10 6.57397     3008
   1   1   1  15   1  -1   0   2   2   1  11 6.89523     3009
   1   1   1  15   1  -1   0   2   2   1  12 6.16683     3010
   1   1   1  15   1  -1   0   2   2   1  13 4.86419     3011
   1   1   1  15   1  -1   0   2   2   1  14 4.34969     3012
   1   1   1  15   1  -1   0   2   2   1  15 5.33375     3013
   1   1   1  15   1  -1   0   2   2   1  17 6.76783     3014
   1   1   1  15   1  -1   0   2   2   1  18 4.52191     3015
   1   1   1  15   1  -1   0   2   2   1  19 3.46334     3016
   1   1   1  15   1  -1   0   2   2   1  21 4.50380     3017
   1   1   1  15   1  -1   0   2   2   1  22 6.79413     3018
   1   1   1  15   1  -1   0   2   2   1  26 4.82587     3019
   1   1   1  15   1  -1   0   2   2   1  27 4.68244     3020
   1   1   1  15   1  -1   0   2   2   1  28 3.58856     3021
   1   1   1  15   1  -1   1   3   1   1   6 6.80889     3022
   1   1   1  15   1  -1   1   3   1   1   7 6.85575     3023
   1   1   1  15   1  -1   1   3   1   1  24 6.08433     3024
   1   1   1  15   1  -1   1   3   1   1  25 6.17317     3025
   1   1   1  15   1  -1   1   3   1   1  27 6.80441     3026
   1   1   1  15   1  -1   1   3   2   1   6 6.80889     3027
   1   1   1  15   1  -1   1   3   2   1   7 6.85574     3028
   1   1   1  15   1  -1   1   3   2   1  24 6.08432     3029
   1   1   1  15   1  -1   1   3   2   1  25 6.17317     3030
   1   1   1  15   1   0   0   1   1   1  11 5.99481     3031
   1   1   1  15   1   0   0   1   1   1  12 5.93372     3032
   1   1   1  15   1   0   0   1   1   1  16 5.33086     3033
   1   1   1  15   1   0   0   1   1   1  17 5.21134     3034
   1   1   1  15   1   0   0   1   1   1  26 6.10181     3035
   1   1   1  15   1   0   0   1   2   1  11 5.99481     3036
   1   1   1  15   1   0   0   1   2   1  12 5.93372     3037
   1   1   1  15   1   0   0   1   2   1  16 5.33086     3038
   1   1   1  15   1   0   0   1   2   1  17 5.21134     3039
   1   1   1  15   1   0   0   1   2   1  20 6.98770     3040
   1   1   1  15   1   0   0   2   1   1   2 5.41395     3041
   1   1   1  15   1   0   0   2   1   1   3 5.26716     3042
   1   1   1  15   1   0   0   2   1   1   4 5.90151     3043
   1   1   1  15   1   0   0   2   1   1   5 6.25317     3044
   1   1   1  15   1   0   0   2   1   1   6 6.02448     3045
   1   1   1  15   1   0   0   2   1   1   7 5.42256     3046
   1   1   1  15   1   0   0   2   1   1   8 4.99398     3047
   1   1   1  15   1   0   0   2   1   1   9 4.88609     3048
   1   1   1  15   1   0   0   2   1   1  10 5.05904     3049
   1   1   1  15   1   0   0   2   1   1  11 5.54629     3050
   1   1   1  15   1   0   0   2   1   1  12 6.17948     3051
   1   1   1  15   1   0   0   2   1   1  13 6.40396     3052
   1   1   1  15   1   0   0   2   1   1  14 6.02411     3053
   1   1   1  15   1   0   0   2   1   1  15 5.33374     3054
   1   1   1  15   1   0   0   2   1   1  16 5.74057     3055
   1   1   1  15   1   0   0   2   1   1  17 6.79233     3056
   1   1   1  15   1   0   0   2   1   1  19 6.53379     3057
   1   1   1  15   1   0   0   2   1   1  20 5.27115     3058
   1   1   1  15   1   0   0   2   1   1  21 6.34844     3059
   1   1   1  15   1   0   0   2   1   1  22 6.40935     3060
   1   1   1  15   1   0   0   2   1   1  23 6.98840     3061
   1   1   1  15   1   0   0   2   1   1  24 6.61792     3062
   1   1   1  15   1   0   0   2   1   1  25 5.61499     3063
   1   1   1  15   1   0   0   2   1   1  26 5.53583     3064
   1   1   1  15   1   0   0   2   1   1  27 4.69853     3065
   1   1   1  15   1   0   0   2   1   1  28 6.15826     3066
   1   1   1  15   1   0   0   2   2   1   2 5.41395     3067
   1   1   1  15   1   0   0   2   2   1   3 5.26717     3068
   1   1   1  15   1   0   0   2   2   1   4 5.90152     3069
   1   1   1  15   1   0   0   2   2   1   5 6.25318     3070
   1   1   1  15   1   0   0   2   2   1   6 6.02449     3071
   1   1   1  15   1   0   0   2   2   1   7 5.42256     3072
   1   1   1  15   1   0   0   2   2   1   8 4.99398     3073
   1   1   1  15   1   0   0   2   2   1   9 4.88609     3074
   1   1   1  15   1   0   0   2   2   1  10 5.05905     3075
   1   1   1  15   1   0   0   2   2   1  11 5.54629     3076
   1   1   1  15   1   0   0   2   2   1  12 6.17948     3077
   1   1   1  15   1   0   0   2   2   1  13 6.40396     3078
   1   1   1  15   1   0   0   2   2   1  14 6.02411     3079
   1   1   1  15   1   0   0   2   2   1  15 5.33374     3080
   1   1   1  15   1   0   0   2   2   1  16 5.74057     3081
   1   1   1  15   1   0   0   2   2   1  17 6.79233     3082
   1   1   1  15   1   0   0   2   2   1  19 6.53379     3083
   1   1   1  15   1   0   0   2   2   1  20 5.32739     3084
   1   1   1  15   1   0   0   2   2   1  21 6.31978     3085
   1   1   1  15   1   0   0   2   2   1  22 6.40936     3086
   1   1   1  15   1   0   0   2   2   1  23 6.98841     3087
   1   1   1  15   1   0   0   2   2   1  24 6.61793     3088
   1   1   1  15   1   0   0   2   2   1  25 5.61500     3089
   1   1   1  15   1   0   0   2   2   1  26 6.98610     3090
   1   1   1  15   1   0   0   2   2   1  27 5.94374     3091
   1   1   1  15   1   0   0   3   1   1  18 6.74098     3092
   1   1   1  15   1   0   0   3   2   1  18 6.74099     3093
   1   1   1  15   1   0   1   3   1   1   2 4.58111     3094
   1   1   1  15   1   0   1   3   1   1   3 3.81968     3095
   1   1   1  15   1   0   1   3   1   1   4 3.69466     3096
   1   1   1  15   1   0   1   3   1   1   5 3.62389     3097
   1   1   1  15   1   0   1   3   1   1   6 3.68452     3098
   1   1   1  15   1   0   1   3   1   1   7 3.80640     3099
   1   1   1  15   1   0   1   3   1   1   8 3.88200     3100
   1   1   1  15   1   0   1   3   1   1   9 4.68239     3101
   1   1   1  15   1   0   1   3   1   1  10 5.31846     3102
   1   1   1  15   1   0   1   3   1   1  11 6.44353     3103
   1   1   1  15   1   0   1   3   1   1  14 6.36324     3104
   1   1   1  15   1   0   1   3   1   1  15 5.28651     3105
   1   1   1  15   1   0   1   3   1   1  16 6.80862     3106
   1   1   1  15   1   0   1   3   1   1  19 6.67035     3107
   1   1   1  15   1   0   1   3   1   1  20 5.47301     3108
   1   1   1  15   1   0   1   3   1   1  21 5.31200     3109
   1   1   1  15   1   0   1   3   1   1  22 4.19166     3110
   1   1   1  15   1   0   1   3   1   1  23 4.06610     3111
   1   1   1  15   1   0   1   3   1   1  24 4.16933     3112
   1   1   1  15   1   0   1   3   1   1  25 4.36095     3113
   1   1   1  15   1   0   1   3   1   1  26 6.22794     3114
   1   1   1  15   1   0   1   3   1   1  27 6.03750     3115
   1   1   1  15   1   0   1   3   1   1  28 4.91287     3116
   1   1   1  15   1   0   1   3   2   1   2 4.58110     3117
   1   1   1  15   1   0   1   3   2   1   3 3.81967     3118
   1   1   1  15   1   0   1   3   2   1   4 3.69464     3119
   1   1   1  15   1   0   1   3   2   1   5 3.62388     3120
   1   1   1  15   1   0   1   3   2   1   6 3.68452     3121
   1   1   1  15   1   0   1   3   2   1   7 3.80640     3122
   1   1   1  15   1   0   1   3   2   1   8 3.88200     3123
   1   1   1  15   1   0   1   3   2   1   9 4.68238     3124
   1   1   1  15   1   0   1   3   2   1  10 5.31845     3125
   1   1   1  15   1   0   1   3   2   1  11 6.44352     3126
   1   1   1  15   1   0   1   3   2   1  14 6.36323     3127
   1   1   1  15   1   0   1   3   2   1  15 5.28650     3128
   1   1   1  15   1   0   1   3   2   1  16 6.80862     3129
   1   1   1  15   1   0   1   3   2   1  19 6.67033     3130
   1   1   1  15   1   0   1   3   2   1  20 5.49494     3131
   1   1   1  15   1   0   1   3   2   1  21 5.24378     3132
   1   1   1  15   1   0   1   3   2   1  22 4.19164     3133
   1   1   1  15   1   0   1   3   2   1  23 4.06609     3134
   1   1   1  15   1   0   1   3   2   1  24 4.16934     3135
   1   1   1  15   1   0   1   3   2   1  25 4.36096     3136
   1   1   1  15   1   0   1   3   2   1  26 4.74008     3137
   1   1   1  15   1   0   1   3   2   1  27 6.03073     3138
   1   1   1  15   1   0   1   3   2   1  28 5.45063     3139
   1   1   1  15   2   0   1   3   1   1   4 6.92761     3140
   1   1   1  15   2   0   1   3   1   1   5 6.68985     3141
   1   1   1  15   2   0   1   3   1   1  22 6.21837     3142
   1   1   1  15   2   0   1   3   1   1  23 5.73801     3143
   1   1   1  15   2   0   1   3   2   1   4 6.92761     3144
   1   1   1  15   2   0   1   3   2   1   5 6.68985     3145
   1   1   1  15   2   0   1   3   2   1  22 6.21837     3146
   1   1   1  15   2   0   1   3   2   1  23 5.73801     3147
   1   1   1  16  -1   0   0   1   1   1   2 4.24236     3148
   1   1   1  16  -1   0   0   1   1   1   3 4.18505     3149
   1   1   1  16  -1   0   0   1   1   1   4 3.63483     3150
   1   1   1  16  -1   0   0   1   1   1   5 4.33760     3151
   1   1   1  16  -1   0   0   1   1   1   6 5.36266     3152
   1   1   1  16  -1   0   0   1   1   1   7 5.75136     3153
   1   1   1  16  -1   0   0   1   1   1   8 5.26827     3154
   1   1   1  16  -1   0   0   1   1   1   9 6.17355     3155
   1   1   1  16  -1   0   0   1   1   1  10 6.20519     3156
   1   1   1  16  -1   0   0   1   1   1  14 5.92798     3157
   1   1   1  16  -1   0   0   1   1   1  15 5.33086     3158
   1   1   1  16  -1   0   0   1   1   1  19 5.63765     3159
   1   1   1  16  -1   0   0   1   1   1  21 3.67062     3160
   1   1   1  16  -1   0   0   1   1   1  22 3.10401     3161
   1   1   1  16  -1   0   0   1   1   1  23 4.44157     3162
   1   1   1  16  -1   0   0   1   1   1  24 6.10145     3163
   1   1   1  16  -1   0   0   1   1   1  25 6.70331     3164
   1   1   1  16  -1   0   0   1   2   1   2 4.24236     3165
   1   1   1  16  -1   0   0   1   2   1   3 4.18505     3166
   1   1   1  16  -1   0   0   1   2   1   4 3.63483     3167
   1   1   1  16  -1   0   0   1   2   1   5 4.33760     3168
   1   1   1  16  -1   0   0   1   2   1   6 5.36266     3169
   1   1   1  16  -1   0   0   1   2   1   7 5.75136     3170
   1   1   1  16  -1   0   0   1   2   1   8 5.26827     3171
   1   1   1  16  -1   0   0   1   2   1   9 6.17355     3172
   1   1   1  16  -1   0   0   1   2   1  10 6.20519     3173
   1   1   1  16  -1   0   0   1   2   1  14 5.92798     3174
   1   1   1  16  -1   0   0   1   2   1  15 5.33086     3175
   1   1   1  16  -1   0   0   1   2   1  19 5.63765     3176
   1   1   1  16  -1   0   0   1   2   1  21 3.69497     3177
   1   1   1  16  -1   0   0   1   2   1  22 3.10401     3178
   1   1   1  16  -1   0   0   1   2   1  23 4.44157     3179
   1   1   1  16  -1   0   0   1   2   1  24 6.10145     3180
   1   1   1  16  -1   0   0   1   2   1  25 6.70331     3181
   1   1   1  16  -1   0   0   1   2   1  26 3.72920     3182
   1   1   1  16  -1   0   0   1   2   1  27 3.17951     3183
   1   1   1  16  -1   0   0   1   2   1  28 4.52030     3184
   1   1   1  16  -1   0   0   4   1   1   3 6.06778     3185
   1   1   1  16  -1   0   0   4   1   1   4 4.91722     3186
   1   1   1  16  -1   0   0   4   1   1   5 3.66337     3187
   1   1   1  16  -1   0   0   4   1   1   6 3.83643     3188
   1   1   1  16  -1   0   0   4   1   1   7 5.16255     3189
   1   1   1  16  -1   0   0   4   1   1   8 6.18297     3190
   1   1   1  16  -1   0   0   4   1   1  22 5.22098     3191
   1   1   1  16  -1   0   0   4   1   1  23 2.84238     3192
   1   1   1  16  -1   0   0   4   1   1  24 3.21774     3193
   1   1   1  16  -1   0   0   4   1   1  25 5.62003     3194
   1   1   1  16  -1   0   0   4   2   1   3 6.06778     3195
   1   1   1  16  -1   0   0   4   2   1   4 4.91722     3196
   1   1   1  16  -1   0   0   4   2   1   5 3.66337     3197
   1   1   1  16  -1   0   0   4   2   1   6 3.83643     3198
   1   1   1  16  -1   0   0   4   2   1   7 5.16256     3199
   1   1   1  16  -1   0   0   4   2   1   8 6.18298     3200
   1   1   1  16  -1   0   0   4   2   1  22 5.22098     3201
   1   1   1  16  -1   0   0   4   2   1  23 2.84238     3202
   1   1   1  16  -1   0   0   4   2   1  24 3.21775     3203
   1   1   1  16  -1   0   0   4   2   1  25 5.62004     3204
   1   1   1  16   0  -1   0   2   1   1   2 6.51397     3205
   1   1   1  16   0  -1   0   2   1   1   9 6.70002     3206
   1   1   1  16   0  -1   0   2   1   1  10 5.49109     3207
   1   1   1  16   0  -1   0   2   1   1  11 4.70540     3208
   1   1   1  16   0  -1   0   2   1   1  12 3.70983     3209
   1   1   1  16   0  -1   0   2   1   1  13 3.55079     3210
   1   1   1  16   0  -1   0   2   1   1  14 4.45682     3211
   1   1   1  16   0  -1   0   2   1   1  15 5.36627     3212
   1   1   1  16   0  -1   0   2   1   1  16 5.19862     3213
   1   1   1  16   0  -1   0   2   1   1  17 3.48109     3214
   1   1   1  16   0  -1   0   2   1   1  18 3.16757     3215
   1   1   1  16   0  -1   0   2   1   1  19 4.80112     3216
   1   1   1  16   0  -1   0   2   1   1  21 6.97952     3217
   1   1   1  16   0  -1   0   2   1   1  26 6.82120     3218
   1   1   1  16   0  -1   0   2   2   1   2 6.51397     3219
   1   1   1  16   0  -1   0   2   2   1   9 6.70002     3220
   1   1   1  16   0  -1   0   2   2   1  10 5.49110     3221
   1   1   1  16   0  -1   0   2   2   1  11 4.70540     3222
   1   1   1  16   0  -1   0   2   2   1  12 3.70984     3223
   1   1   1  16   0  -1   0   2   2   1  13 3.55079     3224
   1   1   1  16   0  -1   0   2   2   1  14 4.45682     3225
   1   1   1  16   0  -1   0   2   2   1  15 5.36626     3226
   1   1   1  16   0  -1   0   2   2   1  16 5.19862     3227
   1   1   1  16   0  -1   0   2   2   1  17 3.48110     3228
   1   1   1  16   0  -1   0   2   2   1  18 3.16756     3229
   1   1   1  16   0  -1   0   2   2   1  19 4.80111     3230
   1   1   1  16   0  -1   0   2   2   1  21 6.94978     3231
   1   1   1  16   0  -1   0   2   2   1  28 6.36519     3232
   1   1   1  16   0  -1   1   3   1   1  20 6.42783     3233
   1   1   1  16   0  -1   1   3   1   1  25 6.36216     3234
   1   1   1  16   0  -1   1   3   1   1  26 6.56796     3235
   1   1   1  16   0  -1   1   3   1   1  27 5.87977     3236
   1   1   1  16   0  -1   1   3   1   1  28 6.03694     3237
   1   1   1  16   0  -1   1   3   2   1  20 6.35450     3238
   1   1   1  16   0  -1   1   3   2   1  25 6.36215     3239
   1   1   1  16   0   0   0   2   1   1   9 6.30481     3240
   1   1   1  16   0   0   0   2   1   1  10 6.50578     3241
   1   1   1  16   0   0   0   2   1   1  11 5.92909     3242
   1   1   1  16   0   0   0   2   1   1  12 6.61176     3243
   1   1   1  16   0   0   0   2   1   1  16 5.19863     3244
   1   1   1  16   0   0   0   2   1   1  17 6.49973     3245
   1   1   1  16   0   0   0   2   1   1  20 5.31410     3246
   1   1   1  16   0   0   0   2   1   1  26 4.78604     3247
   1   1   1  16   0   0   0   2   1   1  27 4.78614     3248
   1   1   1  16   0   0   0   2   1   1  28 6.07616     3249
   1   1   1  16   0   0   0   2   2   1   9 6.30481     3250
   1   1   1  16   0   0   0   2   2   1  10 6.50578     3251
   1   1   1  16   0   0   0   2   2   1  11 5.92908     3252
   1   1   1  16   0   0   0   2   2   1  12 6.61175     3253
   1   1   1  16   0   0   0   2   2   1  16 5.19863     3254
   1   1   1  16   0   0   0   2   2   1  17 6.49972     3255
   1   1   1  16   0   0   0   2   2   1  20 5.30278     3256
   1   1   1  16   0   0   0   3   1   1  13 6.86048     3257
   1   1   1  16   0   0   0   3   1   1  17 6.67348     3258
   1   1   1  16   0   0   0   3   1   1  18 5.93317     3259
   1   1   1  16   0   0   0   3   2   1  13 6.86049     3260
   1   1   1  16   0   0   0   3   2   1  17 6.67348     3261
   1   1   1  16   0   0   0   3   2   1  18 5.93318     3262
   1   1   1  16   0   0   0   4   1   1   6 6.12544     3263
   1   1   1  16   0   0   0   4   1   1   7 5.48171     3264
   1   1   1  16   0   0   0   4   1   1   8 6.15365     3265
   1   1   1  16   0   0   0   4   1   1   9 6.02020     3266
   1   1   1  16   0   0   0   4   1   1  16 6.90652     3267
   1   1   1  16   0   0   0   4   1   1  20 5.05163     3268
   1   1   1  16   0   0   0   4   1   1  24 5.95951     3269
   1   1   1  16   0   0   0   4   1   1  25 4.71113     3270
   1   1   1  16   0   0   0   4   1   1  26 5.42592     3271
   1   1   1  16   0   0   0   4   1   1  27 5.31174     3272
   1   1   1  16   0   0   0   4   1   1  28 4.03684     3273
   1   1   1  16   0   0   0   4   2   1   6 6.12543     3274
   1   1   1  16   0   0   0   4   2   1   7 5.48170     3275
   1   1   1  16   0   0   0   4   2   1   8 6.15364     3276
   1   1   1  16   0   0   0   4   2   1   9 6.02019     3277
   1   1   1  16   0   0   0   4   2   1  16 6.90651     3278
   1   1   1  16   0   0   0   4   2   1  20 4.98658     3279
   1   1   1  16   0   0   0   4   2   1  24 5.95950     3280
   1   1   1  16   0   0   0   4   2   1  25 4.71111     3281
   1   1   1  16   0   0   1   3   1   1   8 6.95749     3282
   1   1   1  16   0   0   1   3   1   1   9 6.55026     3283
   1   1   1  16   0   0   1   3   1   1  10 6.69637     3284
   1   1   1  16   0   0   1   3   1   1  11 6.74386     3285
   1   1   1  16   0   0   1   3   1   1  16 6.63067     3286
   1   1   1  16   0   0   1   3   1   1  20 6.45512     3287
   1   1   1  16   0   0   1   3   1   1  26 6.46449     3288
   1   1   1  16   0   0   1   3   1   1  28 5.77381     3289
   1   1   1  16   0   0   1   3   2   1   8 6.95749     3290
   1   1   1  16   0   0   1   3   2   1   9 6.55026     3291
   1   1   1  16   0   0   1   3   2   1  10 6.69637     3292
   1   1   1  16   0   0   1   3   2   1  11 6.74386     3293
   1   1   1  16   0   0   1   3   2   1  16 6.63068     3294
   1   1   1  16   0   0   1   3   2   1  20 6.43395     3295
   1   1   1  16   0   0   1   4   1   1  11 6.76719     3296
   1   1   1  16   0   0   1   4   1   1  12 6.10933     3297
   1   1   1  16   0   0   1   4   1   1  13 6.33097     3298
   1   1   1  16   0   0   1   4   1   1  16 6.90649     3299
   1   1   1  16   0   0   1   4   1   1  17 5.70251     3300
   1   1   1  16   0   0   1   4   1   1  18 6.12361     3301
   1   1   1  16   0   0   1   4   2   1  11 6.76720     3302
   1   1   1  16   0   0   1   4   2   1  12 6.10934     3303
   1   1   1  16   0   0   1   4   2   1  13 6.33097     3304
   1   1   1  16   0   0   1   4   2   1  16 6.90650     3305
   1   1   1  16   0   0   1   4   2   1  17 5.70253     3306
   1   1   1  16   0   0   1   4   2   1  18 6.12361     3307
   1   1   1  16   1  -1   0   2   1   1   2 5.16498     3308
   1   1   1  16   1  -1   0   2   1   1   3 6.17505     3309
   1   1   1  16   1  -1   0   2   1   1   4 6.16239     3310
   1   1   1  16   1  -1   0   2   1   1  13 6.29745     3311
   1   1   1  16   1  -1   0   2   1   1  14 5.24835     3312
   1   1   1  16   1  -1   0   2   1   1  15 5.74056     3313
   1   1   1  16   1  -1   0   2   1   1  18 6.28593     3314
   1   1   1  16   1  -1   0   2   1   1  19 4.22418     3315
   1   1   1  16   1  -1   0   2   1   1  21 3.50514     3316
   1   1   1  16   1  -1   0   2   1   1  22 5.32180     3317
   1   1   1  16   1  -1   0   2   2   1   2 5.16498     3318
   1   1   1  16   1  -1   0   2   2   1   3 6.17505     3319
   1   1   1  16   1  -1   0   2   2   1   4 6.16239     3320
   1   1   1  16   1  -1   0   2   2   1  13 6.29746     3321
   1   1   1  16   1  -1   0   2   2   1  14 5.24836     3322
   1   1   1  16   1  -1   0   2   2   1  15 5.74057     3323
   1   1   1  16   1  -1   0   2   2   1  18 6.28593     3324
   1   1   1  16   1  -1   0   2   2   1  19 4.22419     3325
   1   1   1  16   1  -1   0   2   2   1  21 3.58408     3326
   1   1   1  16   1  -1   0   2   2   1  22 5.32180     3327
   1   1   1  16   1  -1   0   2   2   1  26 3.65320     3328
   1   1   1  16   1  -1   0   2   2   1  27 3.32808     3329
   1   1   1  16   1  -1   0   2   2   1  28 3.15549     3330
   1   1   1  16   1  -1   1   3   1   1   5 6.25657     3331
   1   1   1  16   1  -1   1   3   1   1   6 5.60340     3332
   1   1   1  16   1  -1   1   3   1   1   7 6.28257     3333
   1   1   1  16   1  -1   1   3   1   1  23 6.06968     3334
   1   1   1  16   1  -1   1   3   1   1  24 4.80237     3335
   1   1   1  16   1  -1   1   3   1   1  25 6.11508     3336
   1   1   1  16   1  -1   1   3   2   1   5 6.25657     3337
   1   1   1  16   1  -1   1   3   2   1   6 5.60339     3338
   1   1   1  16   1  -1   1   3   2   1   7 6.28257     3339
   1   1   1  16   1  -1   1   3   2   1  23 6.06968     3340
   1   1   1  16   1  -1   1   3   2   1  24 4.80237     3341
   1   1   1  16   1  -1   1   3   2   1  25 6.11508     3342
   1   1   1  16   1   0   1   3   1   1   2 5.64720     3343
   1   1   1  16   1   0   1   3   1   1   3 5.16478     3344
   1   1   1  16   1   0   1   3   1   1   4 4.26410     3345
   1   1   1  16   1   0   1   3   1   1   5 4.36331     3346
   1   1   1  16   1   0   1   3   1   1   6 5.32999     3347
   1   1   1  16   1   0   1   3   1   1   7 6.06253     3348
   1   1   1  16   1   0   1   3   1   1   8 6.02459     3349
   1   1   1  16   1   0   1   3   1   1  15 6.80863     3350
   1   1   1  16   1   0   1   3   1   1  21 5.31298     3351
   1   1   1  16   1   0   1   3   1   1  22 3.89691     3352
   1   1   1  16   1   0   1   3   1   1  23 4.07654     3353
   1   1   1  16   1   0   1   3   1   1  24 5.76396     3354
   1   1   1  16   1   0   1   3   1   1  25 6.93543     3355
   1   1   1  16   1   0   1   3   2   1   2 5.64719     3356
   1   1   1  16   1   0   1   3   2   1   3 5.16477     3357
   1   1   1  16   1   0   1   3   2   1   4 4.26409     3358
   1   1   1  16   1   0   1   3   2   1   5 4.36330     3359
   1   1   1  16   1   0   1   3   2   1   6 5.33000     3360
   1   1   1  16   1   0   1   3   2   1   7 6.06254     3361
   1   1   1  16   1   0   1   3   2   1   8 6.02458     3362
   1   1   1  16   1   0   1   3   2   1  15 6.80862     3363
   1   1   1  16   1   0   1   3   2   1  21 5.28856     3364
   1   1   1  16   1   0   1   3   2   1  22 3.89689     3365
   1   1   1  16   1   0   1   3   2   1  23 4.07653     3366
   1   1   1  16   1   0   1   3   2   1  24 5.76397     3367
   1   1   1  16   1   0   1   3   2   1  25 6.93544     3368
   1   1   1  16   1   0   1   3   2   1  26 4.31830     3369
   1   1   1  16   1   0   1   3   2   1  27 5.94455     3370
   1   1   1  16   1   0   1   3   2   1  28 5.42172     3371
   1   1   1  17  -1   0   0   1   1   1   2 4.48925     3372
   1   1   1  17  -1   0   0   1   1   1   3 5.14672     3373
   1   1   1  17  -1   0   0   1   1   1   4 5.06337     3374
   1   1   1  17  -1   0   0   1   1   1   5 6.15554     3375
   1   1   1  17  -1   0   0   1   1   1   8 6.34749     3376
   1   1   1  17  -1   0   0   1   1   1   9 6.88116     3377
   1   1   1  17  -1   0   0   1   1   1  10 6.39578     3378
   1   1   1  17  -1   0   0   1   1   1  13 6.29673     3379
   1   1   1  17  -1   0   0   1   1   1  14 5.19487     3380
   1   1   1  17  -1   0   0   1   1   1  15 5.21134     3381
   1   1   1  17  -1   0   0   1   1   1  18 6.59880     3382
   1   1   1  17  -1   0   0   1   1   1  19 4.56647     3383
   1   1   1  17  -1   0   0   1   1   1  21 3.36404     3384
   1   1   1  17  -1   0   0   1   1   1  22 4.40541     3385
   1   1   1  17  -1   0   0   1   1   1  23 6.43051     3386
   1   1   1  17  -1   0   0   1   2   1   2 4.48925     3387
   1   1   1  17  -1   0   0   1   2   1   3 5.14672     3388
   1   1   1  17  -1   0   0   1   2   1   4 5.06337     3389
   1   1   1  17  -1   0   0   1   2   1   5 6.15554     3390
   1   1   1  17  -1   0   0   1   2   1   8 6.34749     3391
   1   1   1  17  -1   0   0   1   2   1   9 6.88116     3392
   1   1   1  17  -1   0   0   1   2   1  10 6.39578     3393
   1   1   1  17  -1   0   0   1   2   1  13 6.29673     3394
   1   1   1  17  -1   0   0   1   2   1  14 5.19487     3395
   1   1   1  17  -1   0   0   1   2   1  15 5.21135     3396
   1   1   1  17  -1   0   0   1   2   1  18 6.59880     3397
   1   1   1  17  -1   0   0   1   2   1  19 4.56648     3398
   1   1   1  17  -1   0   0   1   2   1  21 3.42753     3399
   1   1   1  17  -1   0   0   1   2   1  22 4.40541     3400
   1   1   1  17  -1   0   0   1   2   1  23 6.43051     3401
   1   1   1  17  -1   0   0   1   2   1  26 3.80765     3402
   1   1   1  17  -1   0   0   1   2   1  27 2.60623     3403
   1   1   1  17  -1   0   0   1   2   1  28 3.87306     3404
   1   1   1  17  -1   0   0   4   1   1   2 6.63944     3405
   1   1   1  17  -1   0   0   4   1   1   3 5.33787     3406
   1   1   1  17  -1   0   0   4   1   1   4 4.37805     3407
   1   1   1  17  -1   0   0   4   1   1   5 3.15039     3408
   1   1   1  17  -1   0   0   4   1   1   6 3.07288     3409
   1   1   1  17  -1   0   0   4   1   1   7 4.26127     3410
   1   1   1  17  -1   0   0   4   1   1   8 5.30013     3411
   1   1   1  17  -1   0   0   4   1   1   9 6.56730     3412
   1   1   1  17  -1   0   0   4   1   1  22 4.85622     3413
   1   1   1  17  -1   0   0   4   1   1  23 2.67727     3414
   1   1   1  17  -1   0   0   4   1   1  24 2.50251     3415
   1   1   1  17  -1   0   0   4   1   1  25 4.66492     3416
   1   1   1  17  -1   0   0   4   1   1  27 6.65010     3417
   1   1   1  17  -1   0   0   4   1   1  28 6.92287     3418
   1   1   1  17  -1   0   0   4   2   1   2 6.63944     3419
   1   1   1  17  -1   0   0   4   2   1   3 5.33787     3420
   1   1   1  17  -1   0   0   4   2   1   4 4.37805     3421
   1   1   1  17  -1   0   0   4   2   1   5 3.15039     3422
   1   1   1  17  -1   0   0   4   2   1   6 3.07288     3423
   1   1   1  17  -1   0   0   4   2   1   7 4.26128     3424
   1   1   1  17  -1   0   0   4   2   1   8 5.30014     3425
   1   1   1  17  -1   0   0   4   2   1   9 6.56731     3426
   1   1   1  17  -1   0   0   4   2   1  22 4.85621     3427
   1   1   1  17  -1   0   0   4   2   1  23 2.67726     3428
   1   1   1  17  -1   0   0   4   2   1  24 2.50252     3429
   1   1   1  17  -1   0   0   4   2   1  25 4.66494     3430
   1   1   1  17  -1   0   0   4   2   1  26 6.82254     3431
   1   1   1  17  -1   1   0   4   1   1  21 6.69931     3432
   1   1   1  17  -1   1   0   4   1   1  22 6.43901     3433
   1   1   1  17  -1   1   0   4   2   1  21 6.70471     3434
   1   1   1  17  -1   1   0   4   2   1  22 6.43902     3435
   1   1   1  17  -1   1   0   4   2   1  26 5.81621     3436
   1   1   1  17  -1   1   0   4   2   1  28 6.36346     3437
   1   1   1  17   0  -1   0   2   1   1   2 6.91860     3438
   1   1   1  17   0  -1   0   2   1   1  10 6.37287     3439
   1   1   1  17   0  -1   0   2   1   1  11 5.99465     3440
   1   1   1  17   0  -1   0   2   1   1  12 5.37933     3441
   1   1   1  17   0  -1   0   2   1   1  13 5.09616     3442
   1   1   1  17   0  -1   0   2   1   1  14 5.48533     3443
   1   1   1  17   0  -1   0   2   1   1  15 6.12249     3444
   1   1   1  17   0  -1   0   2   1   1  16 6.49972     3445
   1   1   1  17   0  -1   0   2   1   1  17 5.46144     3446
   1   1   1  17   0  -1   0   2   1   1  18 4.95010     3447
   1   1   1  17   0  -1   0   2   1   1  19 5.65180     3448
   1   1   1  17   0  -1   0   2   2   1   2 6.91860     3449
   1   1   1  17   0  -1   0   2   2   1  10 6.37287     3450
   1   1   1  17   0  -1   0   2   2   1  11 5.99465     3451
   1   1   1  17   0  -1   0   2   2   1  12 5.37934     3452
   1   1   1  17   0  -1   0   2   2   1  13 5.09616     3453
   1   1   1  17   0  -1   0   2   2   1  14 5.48533     3454
   1   1   1  17   0  -1   0   2   2   1  15 6.12249     3455
   1   1   1  17   0  -1   0   2   2   1  16 6.49972     3456
   1   1   1  17   0  -1   0   2   2   1  17 5.46144     3457
   1   1   1  17   0  -1   0   2   2   1  18 4.95010     3458
   1   1   1  17   0  -1   0   2   2   1  19 5.65179     3459
   1   1   1  17   0  -1   0   2   2   1  28 6.47701     3460
   1   1   1  17   0   0   0   2   1   1   2 6.85616     3461
   1   1   1  17   0   0   0   2   1   1   3 6.57596     3462
   1   1   1  17   0   0   0   2   1   1   6 6.84511     3463
   1   1   1  17   0   0   0   2   1   1   7 5.57914     3464
   1   1   1  17   0   0   0   2   1   1   8 5.35820     3465
   1   1   1  17   0   0   0   2   1   1   9 4.31125     3466
   1   1   1  17   0   0   0   2   1   1  10 4.76007     3467
   1   1   1  17   0   0   0   2   1   1  11 4.33829     3468
   1   1   1  17   0   0   0   2   1   1  12 5.36296     3469
   1   1   1  17   0   0   0   2   1   1  13 6.55660     3470
   1   1   1  17   0   0   0   2   1   1  14 6.86490     3471
   1   1   1  17   0   0   0   2   1   1  15 6.09530     3472
   1   1   1  17   0   0   0   2   1   1  16 3.48110     3473
   1   1   1  17   0   0   0   2   1   1  17 5.46145     3474
   1   1   1  17   0   0   0   2   1   1  20 3.03969     3475
   1   1   1  17   0   0   0   2   1   1  25 4.95138     3476
   1   1   1  17   0   0   0   2   1   1  26 2.51194     3477
   1   1   1  17   0   0   0   2   1   1  27 2.63365     3478
   1   1   1  17   0   0   0   2   1   1  28 3.69872     3479
   1   1   1  17   0   0   0   2   2   1   2 6.85616     3480
   1   1   1  17   0   0   0   2   2   1   3 6.57596     3481
   1   1   1  17   0   0   0   2   2   1   6 6.84512     3482
   1   1   1  17   0   0   0   2   2   1   7 5.57914     3483
   1   1   1  17   0   0   0   2   2   1   8 5.35820     3484
   1   1   1  17   0   0   0   2   2   1   9 4.31125     3485
   1   1   1  17   0   0   0   2   2   1  10 4.76006     3486
   1   1   1  17   0   0   0   2   2   1  11 4.33828     3487
   1   1   1  17   0   0   0   2   2   1  12 5.36295     3488
   1   1   1  17   0   0   0   2   2   1  13 6.55660     3489
   1   1   1  17   0   0   0   2   2   1  14 6.86489     3490
   1   1   1  17   0   0   0   2   2   1  15 6.09530     3491
   1   1   1  17   0   0   0   2   2   1  16 3.48110     3492
   1   1   1  17   0   0   0   2   2   1  17 5.46144     3493
   1   1   1  17   0   0   0   2   2   1  20 3.01213     3494
   1   1   1  17   0   0   0   2   2   1  25 4.95139     3495
   1   1   1  17   0   0   0   3   1   1  11 6.25824     3496
   1   1   1  17   0   0   0   3   1   1  12 5.06152     3497
   1   1   1  17   0   0   0   3   1   1  13 4.87539     3498
   1   1   1  17   0   0   0   3   1   1  14 5.94991     3499
   1   1   1  17   0   0   0   3   1   1  16 6.67348     3500
   1   1   1  17   0   0   0   3   1   1  17 4.50964     3501
   1   1   1  17   0   0   0   3   1   1  18 4.14083     3502
   1   1   1  17   0   0   0   3   1   1  19 6.15691     3503
   1   1   1  17   0   0   0   3   2   1  11 6.25825     3504
   1   1   1  17   0   0   0   3   2   1  12 5.06153     3505
   1   1   1  17   0   0   0   3   2   1  13 4.87541     3506
   1   1   1  17   0   0   0   3   2   1  14 5.94993     3507
   1   1   1  17   0   0   0   3   2   1  16 6.67348     3508
   1   1   1  17   0   0   0   3   2   1  17 4.50965     3509
   1   1   1  17   0   0   0   3   2   1  18 4.14084     3510
   1   1   1  17   0   0   0   3   2   1  19 6.15693     3511
   1   1   1  17   0   0   0   4   1   1   6 6.06127     3512
   1   1   1  17   0   0   0   4   1   1   7 5.10385     3513
   1   1   1  17   0   0   0   4   1   1   8 5.67655     3514
   1   1   1  17   0   0   0   4   1   1   9 5.22666     3515
   1   1   1  17   0   0   0   4   1   1  10 6.30816     3516
   1   1   1  17   0   0   0   4   1   1  11 6.44290     3517
   1   1   1  17   0   0   0   4   1   1  16 5.70254     3518
   1   1   1  17   0   0   0   4   1   1  20 3.79873     3519
   1   1   1  17   0   0   0   4   1   1  24 5.99316     3520
   1   1   1  17   0   0   0   4   1   1  25 4.10671     3521
   1   1   1  17   0   0   0   4   1   1  26 3.99354     3522
   1   1   1  17   0   0   0   4   1   1  27 3.75461     3523
   1   1   1  17   0   0   0   4   1   1  28 3.07353     3524
   1   1   1  17   0   0   0   4   2   1   6 6.06125     3525
   1   1   1  17   0   0   0   4   2   1   7 5.10384     3526
   1   1   1  17   0   0   0   4   2   1   8 5.67654     3527
   1   1   1  17   0   0   0   4   2   1   9 5.22665     3528
   1   1   1  17   0   0   0   4   2   1  10 6.30816     3529
   1   1   1  17   0   0   0   4   2   1  11 6.44289     3530
   1   1   1  17   0   0   0   4   2   1  16 5.70254     3531
   1   1   1  17   0   0   0   4   2   1  20 3.71806     3532
   1   1   1  17   0   0   0   4   2   1  24 5.99315     3533
   1   1   1  17   0   0   0   4   2   1  25 4.10670     3534
   1   1   1  17   0   0   1   3   1   1   7 6.96021     3535
   1   1   1  17   0   0   1   3   1   1   9 6.99494     3536
   1   1   1  17   0   0   1   3   1   1  20 6.60539     3537
   1   1   1  17   0   0   1   3   1   1  25 6.64782     3538
   1   1   1  17   0   0   1   3   1   1  26 6.83229     3539
   1   1   1  17   0   0   1   3   1   1  28 5.66808     3540
   1   1   1  17   0   0   1   3   2   1   7 6.96021     3541
   1   1   1  17   0   0   1   3   2   1   9 6.99494     3542
   1   1   1  17   0   0   1   3   2   1  20 6.56558     3543
   1   1   1  17   0   0   1   3   2   1  25 6.64782     3544
   1   1   1  17   1  -1   0   2   1   1   2 6.05027     3545
   1   1   1  17   1  -1   0   2   1   1   3 6.81881     3546
   1   1   1  17   1  -1   0   2   1   1   4 6.55947     3547
   1   1   1  17   1  -1   0   2   1   1  14 6.50111     3548
   1   1   1  17   1  -1   0   2   1   1  15 6.79233     3549
   1   1   1  17   1  -1   0   2   1   1  19 5.58832     3550
   1   1   1  17   1  -1   0   2   1   1  21 4.48308     3551
   1   1   1  17   1  -1   0   2   1   1  22 5.66016     3552
   1   1   1  17   1  -1   0   2   2   1   2 6.05027     3553
   1   1   1  17   1  -1   0   2   2   1   3 6.81881     3554
   1   1   1  17   1  -1   0   2   2   1   4 6.55947     3555
   1   1   1  17   1  -1   0   2   2   1  14 6.50111     3556
   1   1   1  17   1  -1   0   2   2   1  15 6.79233     3557
   1   1   1  17   1  -1   0   2   2   1  19 5.58833     3558
   1   1   1  17   1  -1   0   2   2   1  21 4.53988     3559
   1   1   1  17   1  -1   0   2   2   1  22 5.66015     3560
   1   1   1  17   1  -1   0   2   2   1  26 4.09965     3561
   1   1   1  17   1  -1   0   2   2   1  27 4.70970     3562
   1   1   1  17   1  -1   0   2   2   1  28 3.98581     3563
   1   1   1  17   1  -1   1   3   1   1  24 6.71800     3564
   1   1   1  17   1  -1   1   3   2   1  24 6.71799     3565
   1   1   1  17   1   0   0   2   1   1   2 5.97877     3566
   1   1   1  17   1   0   0   2   1   1   3 5.34772     3567
   1   1   1  17   1   0   0   2   1   1   4 4.96788     3568
   1   1   1  17   1   0   0   2   1   1   5 4.87180     3569
   1   1   1  17   1   0   0   2   1   1   6 5.13942     3570
   1   1   1  17   1   0   0   2   1   1   7 5.48548     3571
   1   1   1  17   1   0   0   2   1   1   8 5.60652     3572
   1   1   1  17   1   0   0   2   1   1   9 6.42284     3573
   1   1   1  17   1   0   0   2   1   1  10 6.95829     3574
   1   1   1  17   1   0   0   2   1   1  15 6.76783     3575
   1   1   1  17   1   0   0   2   1   1  21 6.33129     3576
   1   1   1  17   1   0   0   2   1   1  22 5.15991     3577
   1   1   1  17   1   0   0   2   1   1  23 5.01007     3578
   1   1   1  17   1   0   0   2   1   1  24 5.45234     3579
   1   1   1  17   1   0   0   2   1   1  25 6.02222     3580
   1   1   1  17   1   0   0   2   1   1  27 6.62703     3581
   1   1   1  17   1   0   0   2   2   1   2 5.97877     3582
   1   1   1  17   1   0   0   2   2   1   3 5.34773     3583
   1   1   1  17   1   0   0   2   2   1   4 4.96789     3584
   1   1   1  17   1   0   0   2   2   1   5 4.87182     3585
   1   1   1  17   1   0   0   2   2   1   6 5.13943     3586
   1   1   1  17   1   0   0   2   2   1   7 5.48548     3587
   1   1   1  17   1   0   0   2   2   1   8 5.60652     3588
   1   1   1  17   1   0   0   2   2   1   9 6.42285     3589
   1   1   1  17   1   0   0   2   2   1  10 6.95829     3590
   1   1   1  17   1   0   0   2   2   1  15 6.76783     3591
   1   1   1  17   1   0   0   2   2   1  21 6.31931     3592
   1   1   1  17   1   0   0   2   2   1  22 5.15993     3593
   1   1   1  17   1   0   0   2   2   1  23 5.01008     3594
   1   1   1  17   1   0   0   2   2   1  24 5.45235     3595
   1   1   1  17   1   0   0   2   2   1  25 6.02223     3596
   1   1   1  17   1   0   0   2   2   1  26 6.48009     3597
   1   1   1  17   1   0   0   2   2   1  27 5.93732     3598
   1   1   1  17   1   0   0   3   1   1  19 6.89452     3599
   1   1   1  17   1   0   0   3   2   1  19 6.89454     3600
   1   1   1  17   1   0   0   3   2   1  27 6.44307     3601
   1   1   1  17   1   0   1   3   1   1   3 6.12008     3602
   1   1   1  17   1   0   1   3   1   1   4 5.05086     3603
   1   1   1  17   1   0   1   3   1   1   5 4.44038     3604
   1   1   1  17   1   0   1   3   1   1   6 5.05854     3605
   1   1   1  17   1   0   1   3   1   1   7 6.08835     3606
   1   1   1  17   1   0   1   3   1   1   8 6.59653     3607
   1   1   1  17   1   0   1   3   1   1  22 5.01673     3608
   1   1   1  17   1   0   1   3   1   1  23 3.84041     3609
   1   1   1  17   1   0   1   3   1   1  24 5.01633     3610
   1   1   1  17   1   0   1   3   1   1  25 6.75309     3611
   1   1   1  17   1   0   1   3   2   1   3 6.12006     3612
   1   1   1  17   1   0   1   3   2   1   4 5.05085     3613
   1   1   1  17   1   0   1   3   2   1   5 4.44037     3614
   1   1   1  17   1   0   1   3   2   1   6 5.05854     3615
   1   1   1  17   1   0   1   3   2   1   7 6.08835     3616
   1   1   1  17   1   0   1   3   2   1   8 6.59652     3617
   1   1   1  17   1   0   1   3   2   1  22 5.01671     3618
   1   1   1  17   1   0   1   3   2   1  23 3.84040     3619
   1   1   1  17   1   0   1   3   2   1  24 5.01634     3620
   1   1   1  17   1   0   1   3   2   1  25 6.75309     3621
   1   1   1  17   1   0   1   3   2   1  26 6.14905     3622
   1   1   1  18  -1   0   0   1   1   1   2 6.55633     3623
   1   1   1  18  -1   0   0   1   1   1   4 6.95679     3624
   1   1   1  18  -1   0   0   1   1   1  19 6.19549     3625
   1   1   1  18  -1   0   0   1   1   1  21 5.06977     3626
   1   1   1  18  -1   0   0   1   1   1  22 6.06937     3627
   1   1   1  18  -1   0   0   1   2   1   2 6.55633     3628
   1   1   1  18  -1   0   0   1   2   1   4 6.95679     3629
   1   1   1  18  -1   0   0   1   2   1  19 6.19549     3630
   1   1   1  18  -1   0   0   1   2   1  21 5.14941     3631
   1   1   1  18  -1   0   0   1   2   1  22 6.06937     3632
   1   1   1  18  -1   0   0   1   2   1  26 5.24487     3633
   1   1   1  18  -1   0   0   1   2   1  27 4.48596     3634
   1   1   1  18  -1   0   0   1   2   1  28 5.28258     3635
   1   1   1  18  -1   0   0   4   1   1   4 6.19250     3636
   1   1   1  18  -1   0   0   4   1   1   5 5.22582     3637
   1   1   1  18  -1   0   0   4   1   1   6 5.32965     3638
   1   1   1  18  -1   0   0   4   1   1   7 6.36295     3639
   1   1   1  18  -1   0   0   4   1   1  22 6.43899     3640
   1   1   1  18  -1   0   0   4   1   1  23 4.68196     3641
   1   1   1  18  -1   0   0   4   1   1  24 4.87371     3642
   1   1   1  18  -1   0   0   4   1   1  25 6.72596     3643
   1   1   1  18  -1   0   0   4   2   1   4 6.19250     3644
   1   1   1  18  -1   0   0   4   2   1   5 5.22582     3645
   1   1   1  18  -1   0   0   4   2   1   6 5.32966     3646
   1   1   1  18  -1   0   0   4   2   1   7 6.36296     3647
   1   1   1  18  -1   0   0   4   2   1  22 6.43899     3648
   1   1   1  18  -1   0   0   4   2   1  23 4.68195     3649
   1   1   1  18  -1   0   0   4   2   1  24 4.87372     3650
   1   1   1  18  -1   0   0   4   2   1  25 6.72597     3651
   1   1   1  18  -1   1   0   4   1   1   4 6.22402     3652
   1   1   1  18  -1   1   0   4   1   1   5 6.65936     3653
   1   1   1  18  -1   1   0   4   1   1  21 6.09943     3654
   1   1   1  18  -1   1   0   4   1   1  22 5.37752     3655
   1   1   1  18  -1   1   0   4   1   1  23 6.23233     3656
   1   1   1  18  -1   1   0   4   2   1   4 6.22403     3657
   1   1   1  18  -1   1   0   4   2   1   5 6.65937     3658
   1   1   1  18  -1   1   0   4   2   1  21 6.11974     3659
   1   1   1  18  -1   1   0   4   2   1  22 5.37753     3660
   1   1   1  18  -1   1   0   4   2   1  23 6.23234     3661
   1   1   1  18  -1   1   0   4   2   1  26 5.13747     3662
   1   1   1  18  -1   1   0   4   2   1  27 6.52490     3663
   1   1   1  18  -1   1   0   4   2   1  28 6.04511     3664
   1   1   1  18   0   0   0   2   1   1   7 6.43626     3665
   1   1   1  18   0   0   0   2   1   1   8 6.08065     3666
   1   1   1  18   0   0   0   2   1   1   9 4.83196     3667
   1   1   1  18   0   0   0   2   1   1  10 5.04599     3668
   1   1   1  18   0   0   0   2   1   1  11 4.24423     3669
   1   1   1  18   0   0   0   2   1   1  12 5.11102     3670
   1   1   1  18   0   0   0   2   1   1  13 6.47339     3671
   1   1   1  18   0   0   0   2   1   1  15 6.44430     3672
   1   1   1  18   0   0   0   2   1   1  16 3.16756     3673
   1   1   1  18   0   0   0   2   1   1  17 4.95010     3674
   1   1   1  18   0   0   0   2   1   1  20 3.49598     3675
   1   1   1  18   0   0   0   2   1   1  25 5.80229     3676
   1   1   1  18   0   0   0   2   1   1  26 2.60278     3677
   1   1   1  18   0   0   0   2   1   1  27 3.77174     3678
   1   1   1  18   0   0   0   2   1   1  28 3.75962     3679
   1   1   1  18   0   0   0   2   2   1   7 6.43626     3680
   1   1   1  18   0   0   0   2   2   1   8 6.08065     3681
   1   1   1  18   0   0   0   2   2   1   9 4.83196     3682
   1   1   1  18   0   0   0   2   2   1  10 5.04599     3683
   1   1   1  18   0   0   0   2   2   1  11 4.24423     3684
   1   1   1  18   0   0   0   2   2   1  12 5.11101     3685
   1   1   1  18   0   0   0   2   2   1  13 6.47339     3686
   1   1   1  18   0   0   0   2   2   1  15 6.44429     3687
   1   1   1  18   0   0   0   2   2   1  16 3.16756     3688
   1   1   1  18   0   0   0   2   2   1  17 4.95009     3689
   1   1   1  18   0   0   0   2   2   1  20 3.44660     3690
   1   1   1  18   0   0   0   2   2   1  25 5.80229     3691
   1   1   1  18   0   0   0   3   1   1  11 5.92979     3692
   1   1   1  18   0   0   0   3   1   1  12 5.00588     3693
   1   1   1  18   0   0   0   3   1   1  13 5.48799     3694
   1   1   1  18   0   0   0   3   1   1  14 6.72068     3695
   1   1   1  18   0   0   0   3   1   1  16 5.93317     3696
   1   1   1  18   0   0   0   3   1   1  17 4.14083     3697
   1   1   1  18   0   0   0   3   1   1  18 5.11148     3698
   1   1   1  18   0   0   0   3   2   1  11 5.92979     3699
   1   1   1  18   0   0   0   3   2   1  12 5.00589     3700
   1   1   1  18   0   0   0   3   2   1  13 5.48800     3701
   1   1   1  18   0   0   0   3   2   1  14 6.72069     3702
   1   1   1  18   0   0   0   3   2   1  16 5.93317     3703
   1   1   1  18   0   0   0   3   2   1  17 4.14083     3704
   1   1   1  18   0   0   0   3   2   1  18 5.11149     3705
   1   1   1  18   0   0   0   4   1   1   3 6.55627     3706
   1   1   1  18   0   0   0   4   1   1   5 6.46505     3707
   1   1   1  18   0   0   0   4   1   1   6 5.09601     3708
   1   1   1  18   0   0   0   4   1   1   7 4.31808     3709
   1   1   1  18   0   0   0   4   1   1   8 5.18212     3710
   1   1   1  18   0   0   0   4   1   1   9 5.04501     3711
   1   1   1  18   0   0   0   4   1   1  10 6.31540     3712
   1   1   1  18   0   0   0   4   1   1  11 6.72408     3713
   1   1   1  18   0   0   0   4   1   1  16 6.12362     3714
   1   1   1  18   0   0   0   4   1   1  20 3.78726     3715
   1   1   1  18   0   0   0   4   1   1  24 4.86583     3716
   1   1   1  18   0   0   0   4   1   1  25 3.25728     3717
   1   1   1  18   0   0   0   4   1   1  26 4.28705     3718
   1   1   1  18   0   0   0   4   1   1  27 3.11485     3719
   1   1   1  18   0   0   0   4   1   1  28 3.44784     3720
   1   1   1  18   0   0   0   4   2   1   3 6.55627     3721
   1   1   1  18   0   0   0   4   2   1   5 6.46504     3722
   1   1   1  18   0   0   0   4   2   1   6 5.09600     3723
   1   1   1  18   0   0   0   4   2   1   7 4.31808     3724
   1   1   1  18   0   0   0   4   2   1   8 5.18211     3725
   1   1   1  18   0   0   0   4   2   1   9 5.04501     3726
   1   1   1  18   0   0   0   4   2   1  10 6.31540     3727
   1   1   1  18   0   0   0   4   2   1  11 6.72408     3728
   1   1   1  18   0   0   0   4   2   1  16 6.12362     3729
   1   1   1  18   0   0   0   4   2   1  20 3.73002     3730
   1   1   1  18   0   0   0   4   2   1  24 4.86582     3731
   1   1   1  18   0   0   0   4   2   1  25 3.25728     3732
   1   1   1  18   0   0   1   3   1   1  28 6.38728     3733
   1   1   1  18   0   1   0   1   1   1  26 6.98856     3734
   1   1   1  18   0   1   0   1   1   1  27 6.37447     3735
   1   1   1  18   0   1   0   4   1   1   2 6.32996     3736
   1   1   1  18   0   1   0   4   1   1   3 6.55189     3737
   1   1   1  18   0   1   0   4   1   1   8 6.65014     3738
   1   1   1  18   0   1   0   4   1   1   9 6.53949     3739
   1   1   1  18   0   1   0   4   1   1  10 6.31540     3740
   1   1   1  18   0   1   0   4   1   1  11 6.66132     3741
   1   1   1  18   0   1   0   4   1   1  12 6.87672     3742
   1   1   1  18   0   1   0   4   1   1  13 6.77316     3743
   1   1   1  18   0   1   0   4   1   1  14 6.45395     3744
   1   1   1  18   0   1   0   4   1   1  15 6.20796     3745
   1   1   1  18   0   1   0   4   1   1  19 6.69891     3746
   1   1   1  18   0   1   0   4   1   1  21 6.80144     3747
   1   1   1  18   0   1   0   4   1   1  28 6.77673     3748
   1   1   1  18   0   1   0   4   2   1   2 6.32996     3749
   1   1   1  18   0   1   0   4   2   1   3 6.55189     3750
   1   1   1  18   0   1   0   4   2   1   8 6.65014     3751
   1   1   1  18   0   1   0   4   2   1   9 6.53948     3752
   1   1   1  18   0   1   0   4   2   1  10 6.31539     3753
   1   1   1  18   0   1   0   4   2   1  11 6.66130     3754
   1   1   1  18   0   1   0   4   2   1  12 6.87670     3755
   1   1   1  18   0   1   0   4   2   1  13 6.77315     3756
   1   1   1  18   0   1   0   4   2   1  14 6.45394     3757
   1   1   1  18   0   1   0   4   2   1  15 6.20795     3758
   1   1   1  18   0   1   0   4   2   1  19 6.69890     3759
   1   1   1  18   0   1   0   4   2   1  21 6.74788     3760
   1   1   1  18   0   1   0   4   2   1  26 6.57388     3761
   1   1   1  18   0   1   0   4   2   1  28 6.30324     3762
   1   1   1  18   1  -1   0   2   1   1   2 6.72488     3763
   1   1   1  18   1  -1   0   2   1   1  14 6.72906     3764
   1   1   1  18   1  -1   0   2   1   1  19 5.95195     3765
   1   1   1  18   1  -1   0   2   1   1  21 5.53813     3766
   1   1   1  18   1  -1   0   2   1   1  22 6.89027     3767
   1   1   1  18   1  -1   0   2   2   1   2 6.72488     3768
   1   1   1  18   1  -1   0   2   2   1  14 6.72906     3769
   1   1   1  18   1  -1   0   2   2   1  19 5.95195     3770
   1   1   1  18   1  -1   0   2   2   1  21 5.56845     3771
   1   1   1  18   1  -1   0   2   2   1  22 6.89026     3772
   1   1   1  18   1  -1   0   2   2   1  26 5.20932     3773
   1   1   1  18   1  -1   0   2   2   1  27 5.99688     3774
   1   1   1  18   1  -1   0   2   2   1  28 4.76782     3775
   1   1   1  18   1   0   0   1   1   1  17 6.59880     3776
   1   1   1  18   1   0   0   1   2   1  17 6.59880     3777
   1   1   1  18   1   0   0   2   1   1   2 3.73404     3778
   1   1   1  18   1   0   0   2   1   1   3 2.96124     3779
   1   1   1  18   1   0   0   2   1   1   4 2.89748     3780
   1   1   1  18   1   0   0   2   1   1   5 3.04064     3781
   1   1   1  18   1   0   0   2   1   1   6 3.21656     3782
   1   1   1  18   1   0   0   2   1   1   7 3.26449     3783
   1   1   1  18   1   0   0   2   1   1   8 3.15672     3784
   1   1   1  18   1   0   0   2   1   1   9 4.03506     3785
   1   1   1  18   1   0   0   2   1   1  10 4.63567     3786
   1   1   1  18   1   0   0   2   1   1  11 5.84687     3787
   1   1   1  18   1   0   0   2   1   1  12 6.69596     3788
   1   1   1  18   1   0   0   2   1   1  13 6.61181     3789
   1   1   1  18   1   0   0   2   1   1  14 5.64776     3790
   1   1   1  18   1   0   0   2   1   1  15 4.52190     3791
   1   1   1  18   1   0   0   2   1   1  16 6.28593     3792
   1   1   1  18   1   0   0   2   1   1  19 5.94711     3793
   1   1   1  18   1   0   0   2   1   1  20 4.98546     3794
   1   1   1  18   1   0   0   2   1   1  21 4.49858     3795
   1   1   1  18   1   0   0   2   1   1  22 3.41207     3796
   1   1   1  18   1   0   0   2   1   1  23 3.63911     3797
   1   1   1  18   1   0   0   2   1   1  24 3.89009     3798
   1   1   1  18   1   0   0   2   1   1  25 3.96047     3799
   1   1   1  18   1   0   0   2   1   1  26 5.75196     3800
   1   1   1  18   1   0   0   2   1   1  27 4.63414     3801
   1   1   1  18   1   0   0   2   1   1  28 5.45313     3802
   1   1   1  18   1   0   0   2   2   1   2 3.73405     3803
   1   1   1  18   1   0   0   2   2   1   3 2.96125     3804
   1   1   1  18   1   0   0   2   2   1   4 2.89749     3805
   1   1   1  18   1   0   0   2   2   1   5 3.04065     3806
   1   1   1  18   1   0   0   2   2   1   6 3.21657     3807
   1   1   1  18   1   0   0   2   2   1   7 3.26450     3808
   1   1   1  18   1   0   0   2   2   1   8 3.15673     3809
   1   1   1  18   1   0   0   2   2   1   9 4.03506     3810
   1   1   1  18   1   0   0   2   2   1  10 4.63567     3811
   1   1   1  18   1   0   0   2   2   1  11 5.84687     3812
   1   1   1  18   1   0   0   2   2   1  12 6.69596     3813
   1   1   1  18   1   0   0   2   2   1  13 6.61181     3814
   1   1   1  18   1   0   0   2   2   1  14 5.64776     3815
   1   1   1  18   1   0   0   2   2   1  15 4.52190     3816
   1   1   1  18   1   0   0   2   2   1  16 6.28593     3817
   1   1   1  18   1   0   0   2   2   1  19 5.94712     3818
   1   1   1  18   1   0   0   2   2   1  20 5.04851     3819
   1   1   1  18   1   0   0   2   2   1  21 4.46205     3820
   1   1   1  18   1   0   0   2   2   1  22 3.41208     3821
   1   1   1  18   1   0   0   2   2   1  23 3.63912     3822
   1   1   1  18   1   0   0   2   2   1  24 3.89010     3823
   1   1   1  18   1   0   0   2   2   1  25 3.96048     3824
   1   1   1  18   1   0   0   2   2   1  26 4.67980     3825
   1   1   1  18   1   0   0   2   2   1  27 4.31417     3826
   1   1   1  18   1   0   0   2   2   1  28 5.38742     3827
   1   1   1  18   1   0   0   3   1   1   2 6.86960     3828
   1   1   1  18   1   0   0   3   1   1  13 6.50150     3829
   1   1   1  18   1   0   0   3   1   1  14 6.16045     3830
   1   1   1  18   1   0   0   3   1   1  15 6.74098     3831
   1   1   1  18   1   0   0   3   1   1  18 6.38031     3832
   1   1   1  18   1   0   0   3   1   1  19 5.73570     3833
   1   1   1  18   1   0   0   3   1   1  21 6.33721     3834
   1   1   1  18   1   0   0   3   2   1   2 6.86962     3835
   1   1   1  18   1   0   0   3   2   1  13 6.50151     3836
   1   1   1  18   1   0   0   3   2   1  14 6.16046     3837
   1   1   1  18   1   0   0   3   2   1  15 6.74099     3838
   1   1   1  18   1   0   0   3   2   1  18 6.38031     3839
   1   1   1  18   1   0   0   3   2   1  19 5.73572     3840
   1   1   1  18   1   0   0   3   2   1  21 6.38233     3841
   1   1   1  18   1   0   0   3   2   1  27 5.57467     3842
   1   1   1  18   1   0   0   3   2   1  28 6.58535     3843
   1   1   1  18   1   0   1   3   1   1   3 6.03809     3844
   1   1   1  18   1   0   1   3   1   1   4 5.28389     3845
   1   1   1  18   1   0   1   3   1   1   5 4.32865     3846
   1   1   1  18   1   0   1   3   1   1   6 4.20720     3847
   1   1   1  18   1   0   1   3   1   1   7 5.07233     3848
   1   1   1  18   1   0   1   3   1   1   8 5.95413     3849
   1   1   1  18   1   0   1   3   1   1  22 5.73633     3850
   1   1   1  18   1   0   1   3   1   1  23 4.05420     3851
   1   1   1  18   1   0   1   3   1   1  24 3.82789     3852
   1   1   1  18   1   0   1   3   1   1  25 5.37930     3853
   1   1   1  18   1   0   1   3   1   1  28 6.78668     3854
   1   1   1  18   1   0   1   3   2   1   3 6.03808     3855
   1   1   1  18   1   0   1   3   2   1   4 5.28387     3856
   1   1   1  18   1   0   1   3   2   1   5 4.32863     3857
   1   1   1  18   1   0   1   3   2   1   6 4.20719     3858
   1   1   1  18   1   0   1   3   2   1   7 5.07233     3859
   1   1   1  18   1   0   1   3   2   1   8 5.95413     3860
   1   1   1  18   1   0   1   3   2   1  22 5.73630     3861
   1   1   1  18   1   0   1   3   2   1  23 4.05418     3862
   1   1   1  18   1   0   1   3   2   1  24 3.82788     3863
   1   1   1  18   1   0   1   3   2   1  25 5.37930     3864
   1   1   1  19  -1   0   0   1   1   1  21 6.52398     3865
   1   1   1  19  -1   0   0   1   1   1  22 6.69555     3866
   1   1   1  19  -1   0   0   1   2   1  21 6.59635     3867
   1   1   1  19  -1   0   0   1   2   1  22 6.69555     3868
   1   1   1  19  -1   0   0   1   2   1  26 6.34666     3869
   1   1   1  19  -1   0   0   1   2   1  27 6.08427     3870
   1   1   1  19  -1   0   0   1   2   1  28 6.82659     3871
   1   1   1  19  -1   0   0   4   1   1   5 6.93713     3872
   1   1   1  19  -1   0   0   4   1   1  23 6.12376     3873
   1   1   1  19  -1   0   0   4   1   1  24 6.74141     3874
   1   1   1  19  -1   0   0   4   2   1   5 6.93713     3875
   1   1   1  19  -1   0   0   4   2   1  23 6.12376     3876
   1   1   1  19  -1   0   0   4   2   1  24 6.74142     3877
   1   1   1  19   0   0   0   2   1   1  10 6.94517     3878
   1   1   1  19   0   0   0   2   1   1  11 5.81541     3879
   1   1   1  19   0   0   0   2   1   1  12 6.22905     3880
   1   1   1  19   0   0   0   2   1   1  16 4.80111     3881
   1   1   1  19   0   0   0   2   1   1  17 5.65179     3882
   1   1   1  19   0   0   0   2   1   1  20 5.85594     3883
   1   1   1  19   0   0   0   2   1   1  26 4.89028     3884
   1   1   1  19   0   0   0   2   1   1  27 6.12873     3885
   1   1   1  19   0   0   0   2   1   1  28 6.15235     3886
   1   1   1  19   0   0   0   2   2   1  10 6.94517     3887
   1   1   1  19   0   0   0   2   2   1  11 5.81541     3888
   1   1   1  19   0   0   0   2   2   1  12 6.22904     3889
   1   1   1  19   0   0   0   2   2   1  16 4.80111     3890
   1   1   1  19   0   0   0   2   2   1  17 5.65178     3891
   1   1   1  19   0   0   0   2   2   1  20 5.81484     3892
   1   1   1  19   0   0   0   3   1   1  17 6.15691     3893
   1   1   1  19   0   0   0   3   2   1  17 6.15692     3894
   1   1   1  19   0   0   0   4   1   1   3 6.26283     3895
   1   1   1  19   0   0   0   4   1   1   4 6.28259     3896
   1   1   1  19   0   0   0   4   1   1   5 5.28441     3897
   1   1   1  19   0   0   0   4   1   1   6 3.94557     3898
   1   1   1  19   0   0   0   4   1   1   7 3.85418     3899
   1   1   1  19   0   0   0   4   1   1   8 5.16317     3900
   1   1   1  19   0   0   0   4   1   1   9 5.66269     3901
   1   1   1  19   0   0   0   4   1   1  20 5.00293     3902
   1   1   1  19   0   0   0   4   1   1  23 5.70366     3903
   1   1   1  19   0   0   0   4   1   1  24 3.26855     3904
   1   1   1  19   0   0   0   4   1   1  25 3.06321     3905
   1   1   1  19   0   0   0   4   1   1  26 5.83048     3906
   1   1   1  19   0   0   0   4   1   1  27 4.37299     3907
   1   1   1  19   0   0   0   4   1   1  28 4.57460     3908
   1   1   1  19   0   0   0   4   2   1   3 6.26283     3909
   1   1   1  19   0   0   0   4   2   1   4 6.28258     3910
   1   1   1  19   0   0   0   4   2   1   5 5.28441     3911
   1   1   1  19   0   0   0   4   2   1   6 3.94556     3912
   1   1   1  19   0   0   0   4   2   1   7 3.85417     3913
   1   1   1  19   0   0   0   4   2   1   8 5.16316     3914
   1   1   1  19   0   0   0   4   2   1   9 5.66270     3915
   1   1   1  19   0   0   0   4   2   1  20 4.97352     3916
   1   1   1  19   0   0   0   4   2   1  23 5.70365     3917
   1   1   1  19   0   0   0   4   2   1  24 3.26854     3918
   1   1   1  19   0   0   0   4   2   1  25 3.06321     3919
   1   1   1  19   0   1   0   1   1   1  20 6.97865     3920
   1   1   1  19   0   1   0   1   1   1  27 6.06184     3921
   1   1   1  19   0   1   0   1   2   1  20 6.99802     3922
   1   1   1  19   0   1   0   4   1   1   2 6.31009     3923
   1   1   1  19   0   1   0   4   1   1   3 6.26283     3924
   1   1   1  19   0   1   0   4   1   1   4 6.31819     3925
   1   1   1  19   0   1   0   4   1   1   5 6.70971     3926
   1   1   1  19   0   1   0   4   1   1   8 6.63970     3927
   1   1   1  19   0   1   0   4   1   1  15 6.71704     3928
   1   1   1  19   0   1   0   4   1   1  21 6.46532     3929
   1   1   1  19   0   1   0   4   1   1  22 6.37323     3930
   1   1   1  19   0   1   0   4   2   1   2 6.31009     3931
   1   1   1  19   0   1   0   4   2   1   3 6.26283     3932
   1   1   1  19   0   1   0   4   2   1   4 6.31820     3933
   1   1   1  19   0   1   0   4   2   1   5 6.70972     3934
   1   1   1  19   0   1   0   4   2   1   8 6.63970     3935
   1   1   1  19   0   1   0   4   2   1  15 6.71704     3936
   1   1   1  19   0   1   0   4   2   1  21 6.41957     3937
   1   1   1  19   0   1   0   4   2   1  22 6.37324     3938
   1   1   1  19   0   1   0   4   2   1  26 5.88774     3939
   1   1   1  19   0   1   0   4   2   1  28 6.09088     3940
   1   1   1  19   0   1   1   4   1   1  18 6.69889     3941
   1   1   1  19   0   1   1   4   2   1  18 6.69890     3942
   1   1   1  19   1  -1   0   2   1   1   2 6.59885     3943
   1   1   1  19   1  -1   0   2   1   1  13 6.20732     3944
   1   1   1  19   1  -1   0   2   1   1  14 5.76781     3945
   1   1   1  19   1  -1   0   2   1   1  15 6.53380     3946
   1   1   1  19   1  -1   0   2   1   1  18 5.94712     3947
   1   1   1  19   1  -1   0   2   1   1  19 5.10034     3948
   1   1   1  19   1  -1   0   2   1   1  21 5.76192     3949
   1   1   1  19   1  -1   0   2   2   1   2 6.59884     3950
   1   1   1  19   1  -1   0   2   2   1  13 6.20732     3951
   1   1   1  19   1  -1   0   2   2   1  14 5.76781     3952
   1   1   1  19   1  -1   0   2   2   1  15 6.53380     3953
   1   1   1  19   1  -1   0   2   2   1  18 5.94713     3954
   1   1   1  19   1  -1   0   2   2   1  19 5.10034     3955
   1   1   1  19   1  -1   0   2   2   1  21 5.77930     3956
   1   1   1  19   1  -1   0   2   2   1  26 5.81008     3957
   1   1   1  19   1  -1   0   2   2   1  27 6.20100     3958
   1   1   1  19   1  -1   0   2   2   1  28 4.84084     3959
   1   1   1  19   1   0   0   1   1   1  11 5.96320     3960
   1   1   1  19   1   0   0   1   1   1  12 5.42314     3961
   1   1   1  19   1   0   0   1   1   1  13 6.27604     3962
   1   1   1  19   1   0   0   1   1   1  16 5.63764     3963
   1   1   1  19   1   0   0   1   1   1  17 4.56647     3964
   1   1   1  19   1   0   0   1   1   1  18 6.19549     3965
   1   1   1  19   1   0   0   1   1   1  26 6.92933     3966
   1   1   1  19   1   0   0   1   2   1  11 5.96320     3967
   1   1   1  19   1   0   0   1   2   1  12 5.42314     3968
   1   1   1  19   1   0   0   1   2   1  13 6.27604     3969
   1   1   1  19   1   0   0   1   2   1  16 5.63764     3970
   1   1   1  19   1   0   0   1   2   1  17 4.56647     3971
   1   1   1  19   1   0   0   1   2   1  18 6.19549     3972
   1   1   1  19   1   0   0   2   1   1   2 3.51015     3973
   1   1   1  19   1   0   0   2   1   1   3 3.25580     3974
   1   1   1  19   1   0   0   2   1   1   4 4.13633     3975
   1   1   1  19   1   0   0   2   1   1   5 4.60294     3976
   1   1   1  19   1   0   0   2   1   1   6 4.33795     3977
   1   1   1  19   1   0   0   2   1   1   7 3.53804     3978
   1   1   1  19   1   0   0   2   1   1   8 2.86890     3979
   1   1   1  19   1   0   0   2   1   1   9 2.78162     3980
   1   1   1  19   1   0   0   2   1   1  10 3.09457     3981
   1   1   1  19   1   0   0   2   1   1  11 3.91217     3982
   1   1   1  19   1   0   0   2   1   1  12 4.77787     3983
   1   1   1  19   1   0   0   2   1   1  13 5.01851     3984
   1   1   1  19   1   0   0   2   1   1  14 4.46565     3985
   1   1   1  19   1   0   0   2   1   1  15 3.46333     3986
   1   1   1  19   1   0   0   2   1   1  16 4.22418     3987
   1   1   1  19   1   0   0   2   1   1  17 5.58832     3988
   1   1   1  19   1   0   0   2   1   1  18 5.95194     3989
   1   1   1  19   1   0   0   2   1   1  19 5.10033     3990
   1   1   1  19   1   0   0   2   1   1  20 3.49837     3991
   1   1   1  19   1   0   0   2   1   1  21 4.77739     3992
   1   1   1  19   1   0   0   2   1   1  22 4.80417     3993
   1   1   1  19   1   0   0   2   1   1  23 5.51539     3994
   1   1   1  19   1   0   0   2   1   1  24 5.11814     3995
   1   1   1  19   1   0   0   2   1   1  25 3.87061     3996
   1   1   1  19   1   0   0   2   1   1  26 3.94195     3997
   1   1   1  19   1   0   0   2   1   1  27 3.18185     3998
   1   1   1  19   1   0   0   2   1   1  28 4.33207     3999
   1   1   1  19   1   0   0   2   2   1   2 3.51016     4000
   1   1   1  19   1   0   0   2   2   1   3 3.25580     4001
   1   1   1  19   1   0   0   2   2   1   4 4.13634     4002
   1   1   1  19   1   0   0   2   2   1   5 4.60295     4003
   1   1   1  19   1   0   0   2   2   1   6 4.33796     4004
   1   1   1  19   1   0   0   2   2   1   7 3.53805     4005
   1   1   1  19   1   0   0   2   2   1   8 2.86891     4006
   1   1   1  19   1   0   0   2   2   1   9 2.78162     4007
   1   1   1  19   1   0   0   2   2   1  10 3.09457     4008
   1   1   1  19   1   0   0   2   2   1  11 3.91217     4009
   1   1   1  19   1   0   0   2   2   1  12 4.77787     4010
   1   1   1  19   1   0   0   2   2   1  13 5.01851     4011
   1   1   1  19   1   0   0   2   2   1  14 4.46565     4012
   1   1   1  19   1   0   0   2   2   1  15 3.46334     4013
   1   1   1  19   1   0   0   2   2   1  16 4.22418     4014
   1   1   1  19   1   0   0   2   2   1  17 5.58832     4015
   1   1   1  19   1   0   0   2   2   1  18 5.95194     4016
   1   1   1  19   1   0   0   2   2   1  19 5.10033     4017
   1   1   1  19   1   0   0   2   2   1  20 3.56853     4018
   1   1   1  19   1   0   0   2   2   1  21 4.72863     4019
   1   1   1  19   1   0   0   2   2   1  22 4.80417     4020
   1   1   1  19   1   0   0   2   2   1  23 5.51539     4021
   1   1   1  19   1   0   0   2   2   1  24 5.11815     4022
   1   1   1  19   1   0   0   2   2   1  25 3.87062     4023
   1   1   1  19   1   0   0   2   2   1  26 5.34584     4024
   1   1   1  19   1   0   0   2   2   1  27 4.59993     4025
   1   1   1  19   1   0   0   2   2   1  28 5.45740     4026
   1   1   1  19   1   0   0   3   1   1  12 6.73994     4027
   1   1   1  19   1   0   0   3   1   1  13 6.08694     4028
   1   1   1  19   1   0   0   3   1   1  14 6.26959     4029
   1   1   1  19   1   0   0   3   1   1  17 6.89453     4030
   1   1   1  19   1   0   0   3   1   1  18 5.73570     4031
   1   1   1  19   1   0   0   3   1   1  19 6.07022     4032
   1   1   1  19   1   0   0   3   2   1  12 6.73994     4033
   1   1   1  19   1   0   0   3   2   1  13 6.08695     4034
   1   1   1  19   1   0   0   3   2   1  14 6.26961     4035
   1   1   1  19   1   0   0   3   2   1  17 6.89452     4036
   1   1   1  19   1   0   0   3   2   1  18 5.73571     4037
   1   1   1  19   1   0   0   3   2   1  19 6.07024     4038
   1   1   1  19   1   0   0   3   2   1  27 6.85117     4039
   1   1   1  19   1   0   1   3   1   1   2 6.06890     4040
   1   1   1  19   1   0   1   3   1   1   3 4.99283     4041
   1   1   1  19   1   0   1   3   1   1   4 4.82412     4042
   1   1   1  19   1   0   1   3   1   1   5 4.16260     4043
   1   1   1  19   1   0   1   3   1   1   6 3.58199     4044
   1   1   1  19   1   0   1   3   1   1   7 3.77467     4045
   1   1   1  19   1   0   1   3   1   1   8 4.51289     4046
   1   1   1  19   1   0   1   3   1   1   9 5.27368     4047
   1   1   1  19   1   0   1   3   1   1  10 6.30330     4048
   1   1   1  19   1   0   1   3   1   1  15 6.67034     4049
   1   1   1  19   1   0   1   3   1   1  20 5.48536     4050
   1   1   1  19   1   0   1   3   1   1  22 5.56547     4051
   1   1   1  19   1   0   1   3   1   1  23 4.50126     4052
   1   1   1  19   1   0   1   3   1   1  24 3.51875     4053
   1   1   1  19   1   0   1   3   1   1  25 3.86003     4054
   1   1   1  19   1   0   1   3   1   1  26 6.31638     4055
   1   1   1  19   1   0   1   3   1   1  27 5.83302     4056
   1   1   1  19   1   0   1   3   1   1  28 4.66345     4057
   1   1   1  19   1   0   1   3   2   1   2 6.06888     4058
   1   1   1  19   1   0   1   3   2   1   3 4.99282     4059
   1   1   1  19   1   0   1   3   2   1   4 4.82410     4060
   1   1   1  19   1   0   1   3   2   1   5 4.16259     4061
   1   1   1  19   1   0   1   3   2   1   6 3.58198     4062
   1   1   1  19   1   0   1   3   2   1   7 3.77467     4063
   1   1   1  19   1   0   1   3   2   1   8 4.51288     4064
   1   1   1  19   1   0   1   3   2   1   9 5.27368     4065
   1   1   1  19   1   0   1   3   2   1  10 6.30330     4066
   1   1   1  19   1   0   1   3   2   1  15 6.67033     4067
   1   1   1  19   1   0   1   3   2   1  20 5.47913     4068
   1   1   1  19   1   0   1   3   2   1  22 5.56545     4069
   1   1   1  19   1   0   1   3   2   1  23 4.50125     4070
   1   1   1  19   1   0   1   3   2   1  24 3.51874     4071
   1   1   1  19   1   0   1   3   2   1  25 3.86003     4072
   1   1   1  19   1   0   1   3   2   1  26 6.57712     4073
   1   1   1  19   2   0   0   2   1   1  22 6.71968     4074
   1   1   1  19   2   0   0   2   1   1  23 6.91281     4075
   1   1   1  19   2   0   0   2   2   1  22 6.71970     4076
   1   1   1  19   2   0   0   2   2   1  23 6.91282     4077
   1   1   1  19   2   0   1   3   1   1   4 6.94616     4078
   1   1   1  19   2   0   1   3   1   1   5 6.29163     4079
   1   1   1  19   2   0   1   3   1   1  22 6.53516     4080
   1   1   1  19   2   0   1   3   1   1  23 5.22386     4081
   1   1   1  19   2   0   1   3   2   1   4 6.94616     4082
   1   1   1  19   2   0   1   3   2   1   5 6.29163     4083
   1   1   1  19   2   0   1   3   2   1  22 6.53515     4084
   1   1   1  19   2   0   1   3   2   1  23 5.22385     4085
   1   1   1  20  -1  -1   0   1   2   1  26 6.67326     4086
   1   1   1  20  -1  -1   0   1   2   1  28 6.83867     4087
   1   1   1  20  -1   0   0   1   1   1   2 5.77513     4088
   1   1   1  20  -1   0   0   1   1   1   3 5.08885     4089
   1   1   1  20  -1   0   0   1   1   1   4 4.01743     4090
   1   1   1  20  -1   0   0   1   1   1   5 3.87232     4091
   1   1   1  20  -1   0   0   1   1   1   6 4.82955     4092
   1   1   1  20  -1   0   0   1   1   1   7 5.72114     4093
   1   1   1  20  -1   0   0   1   1   1   8 5.87418     4094
   1   1   1  20  -1   0   0   1   1   1  21 5.55361     4095
   1   1   1  20  -1   0   0   1   1   1  22 3.70825     4096
   1   1   1  20  -1   0   0   1   1   1  23 3.43866     4097
   1   1   1  20  -1   0   0   1   1   1  24 5.14387     4098
   1   1   1  20  -1   0   0   1   1   1  25 6.57331     4099
   1   1   1  20  -1   0   0   1   2   1   2 5.77513     4100
   1   1   1  20  -1   0   0   1   2   1   3 5.08885     4101
   1   1   1  20  -1   0   0   1   2   1   4 4.01743     4102
   1   1   1  20  -1   0   0   1   2   1   5 3.87232     4103
   1   1   1  20  -1   0   0   1   2   1   6 4.82955     4104
   1   1   1  20  -1   0   0   1   2   1   7 5.72114     4105
   1   1   1  20  -1   0   0   1   2   1   8 5.87418     4106
   1   1   1  20  -1   0   0   1   2   1  21 5.55555     4107
   1   1   1  20  -1   0   0   1   2   1  22 3.70825     4108
   1   1   1  20  -1   0   0   1   2   1  23 3.43866     4109
   1   1   1  20  -1   0   0   1   2   1  24 5.14387     4110
   1   1   1  20  -1   0   0   1   2   1  25 6.57331     4111
   1   1   1  20  -1   0   0   1   2   1  26 5.24162     4112
   1   1   1  20  -1   0   0   1   2   1  27 5.33209     4113
   1   1   1  20  -1   0   0   1   2   1  28 6.42170     4114
   1   1   1  20  -1   0   0   4   1   1   4 6.81279     4115
   1   1   1  20  -1   0   0   4   1   1   5 5.76390     4116
   1   1   1  20  -1   0   0   4   1   1   6 6.11094     4117
   1   1   1  20  -1   0   0   4   1   1  22 6.87964     4118
   1   1   1  20  -1   0   0   4   1   1  23 4.87523     4119
   1   1   1  20  -1   0   0   4   1   1  24 5.57253     4120
   1   1   1  20  -1   0   0   4   2   1   4 6.81279     4121
   1   1   1  20  -1   0   0   4   2   1   5 5.76390     4122
   1   1   1  20  -1   0   0   4   2   1   6 6.11095     4123
   1   1   1  20  -1   0   0   4   2   1  22 6.87965     4124
   1   1   1  20  -1   0   0   4   2   1  23 4.87524     4125
   1   1   1  20  -1   0   0   4   2   1  24 5.57254     4126
   1   1   1  20  -1   0   1   4   2   1  27 6.31030     4127
   1   1   1  20   0  -1   0   1   1   1  19 6.97865     4128
   1   1   1  20   0  -1   0   1   2   1  19 6.97865     4129
   1   1   1  20   0  -1   0   1   2   1  28 6.92869     4130
   1   1   1  20   0  -1   0   2   1   1  10 6.24617     4131
   1   1   1  20   0  -1   0   2   1   1  11 5.06137     4132
   1   1   1  20   0  -1   0   2   1   1  12 3.86764     4133
   1   1   1  20   0  -1   0   2   1   1  13 4.08116     4134
   1   1   1  20   0  -1   0   2   1   1  14 5.38406     4135
   1   1   1  20   0  -1   0   2   1   1  15 6.36193     4136
   1   1   1  20   0  -1   0   2   1   1  16 5.31409     4137
   1   1   1  20   0  -1   0   2   1   1  17 3.03969     4138
   1   1   1  20   0  -1   0   2   1   1  18 3.49598     4139
   1   1   1  20   0  -1   0   2   1   1  19 5.85594     4140
   1   1   1  20   0  -1   0   2   2   1  10 6.24617     4141
   1   1   1  20   0  -1   0   2   2   1  11 5.06138     4142
   1   1   1  20   0  -1   0   2   2   1  12 3.86764     4143
   1   1   1  20   0  -1   0   2   2   1  13 4.08115     4144
   1   1   1  20   0  -1   0   2   2   1  14 5.38406     4145
   1   1   1  20   0  -1   0   2   2   1  15 6.36193     4146
   1   1   1  20   0  -1   0   2   2   1  16 5.31410     4147
   1   1   1  20   0  -1   0   2   2   1  17 3.03969     4148
   1   1   1  20   0  -1   0   2   2   1  18 3.49598     4149
   1   1   1  20   0  -1   0   2   2   1  19 5.85593     4150
   1   1   1  20   0  -1   1   3   1   1   9 6.82398     4151
   1   1   1  20   0  -1   1   3   1   1  16 6.42783     4152
   1   1   1  20   0  -1   1   3   1   1  20 5.19645     4153
   1   1   1  20   0  -1   1   3   1   1  25 6.17110     4154
   1   1   1  20   0  -1   1   3   1   1  26 4.95364     4155
   1   1   1  20   0  -1   1   3   1   1  27 4.82423     4156
   1   1   1  20   0  -1   1   3   1   1  28 5.03589     4157
   1   1   1  20   0  -1   1   3   2   1   9 6.82398     4158
   1   1   1  20   0  -1   1   3   2   1  16 6.42783     4159
   1   1   1  20   0  -1   1   3   2   1  20 5.12083     4160
   1   1   1  20   0  -1   1   3   2   1  25 6.17110     4161
   1   1   1  20   0   0   0   4   1   1   6 6.58027     4162
   1   1   1  20   0   0   0   4   1   1   7 6.40202     4163
   1   1   1  20   0   0   0   4   1   1  20 6.91311     4164
   1   1   1  20   0   0   0   4   1   1  24 6.27443     4165
   1   1   1  20   0   0   0   4   1   1  25 5.93560     4166
   1   1   1  20   0   0   0   4   1   1  28 5.86873     4167
   1   1   1  20   0   0   0   4   2   1   6 6.58027     4168
   1   1   1  20   0   0   0   4   2   1   7 6.40201     4169
   1   1   1  20   0   0   0   4   2   1  20 6.86680     4170
   1   1   1  20   0   0   0   4   2   1  24 6.27442     4171
   1   1   1  20   0   0   0   4   2   1  25 5.93559     4172
   1   1   1  20   0   0   1   3   1   1  10 6.85838     4173
   1   1   1  20   0   0   1   3   1   1  11 6.48630     4174
   1   1   1  20   0   0   1   3   1   1  12 6.56691     4175
   1   1   1  20   0   0   1   3   1   1  13 6.99610     4176
   1   1   1  20   0   0   1   3   1   1  16 6.45513     4177
   1   1   1  20   0   0   1   3   1   1  17 6.60540     4178
   1   1   1  20   0   0   1   3   1   1  26 6.96512     4179
   1   1   1  20   0   0   1   3   1   1  28 6.89748     4180
   1   1   1  20   0   0   1   3   2   1  10 6.85838     4181
   1   1   1  20   0   0   1   3   2   1  11 6.48631     4182
   1   1   1  20   0   0   1   3   2   1  12 6.56691     4183
   1   1   1  20   0   0   1   3   2   1  13 6.99610     4184
   1   1   1  20   0   0   1   3   2   1  16 6.45513     4185
   1   1   1  20   0   0   1   3   2   1  17 6.60540     4186
   1   1   1  20   0   0   1   4   1   1   2 6.31936     4187
   1   1   1  20   0   0   1   4   1   1   9 6.36239     4188
   1   1   1  20   0   0   1   4   1   1  10 5.29135     4189
   1   1   1  20   0   0   1   4   1   1  11 4.62074     4190
   1   1   1  20   0   0   1   4   1   1  12 3.89375     4191
   1   1   1  20   0   0   1   4   1   1  13 3.88156     4192
   1   1   1  20   0   0   1   4   1   1  14 4.59042     4193
   1   1   1  20   0   0   1   4   1   1  15 5.25892     4194
   1   1   1  20   0   0   1   4   1   1  16 5.05161     4195
   1   1   1  20   0   0   1   4   1   1  17 3.79870     4196
   1   1   1  20   0   0   1   4   1   1  18 3.78725     4197
   1   1   1  20   0   0   1   4   1   1  19 5.00293     4198
   1   1   1  20   0   0   1   4   1   1  20 6.91309     4199
   1   1   1  20   0   0   1   4   1   1  21 6.87712     4200
   1   1   1  20   0   0   1   4   1   1  26 6.45622     4201
   1   1   1  20   0   0   1   4   2   1   2 6.31936     4202
   1   1   1  20   0   0   1   4   2   1   9 6.36240     4203
   1   1   1  20   0   0   1   4   2   1  10 5.29135     4204
   1   1   1  20   0   0   1   4   2   1  11 4.62075     4205
   1   1   1  20   0   0   1   4   2   1  12 3.89376     4206
   1   1   1  20   0   0   1   4   2   1  13 3.88157     4207
   1   1   1  20   0   0   1   4   2   1  14 4.59042     4208
   1   1   1  20   0   0   1   4   2   1  15 5.25891     4209
   1   1   1  20   0   0   1   4   2   1  16 5.05163     4210
   1   1   1  20   0   0   1   4   2   1  17 3.79872     4211
   1   1   1  20   0   0   1   4   2   1  18 3.78726     4212
   1   1   1  20   0   0   1   4   2   1  19 5.00293     4213
   1   1   1  20   0   0   1   4   2   1  20 6.97262     4214
   1   1   1  20   0   0   1   4   2   1  21 6.86755     4215
   1   1   1  20   0   0   1   4   2   1  27 6.51075     4216
   1   1   1  20   0   0   1   4   2   1  28 6.94728     4217
   1   1   1  20   1  -1   0   2   1   1   2 5.17455     4218
   1   1   1  20   1  -1   0   2   1   1   3 6.38644     4219
   1   1   1  20   1  -1   0   2   1   1   4 6.77998     4220
   1   1   1  20   1  -1   0   2   1   1  10 6.59046     4221
   1   1   1  20   1  -1   0   2   1   1  12 6.48569     4222
   1   1   1  20   1  -1   0   2   1   1  13 5.18259     4223
   1   1   1  20   1  -1   0   2   1   1  14 4.45237     4224
   1   1   1  20   1  -1   0   2   1   1  15 5.27115     4225
   1   1   1  20   1  -1   0   2   1   1  18 4.98546     4226
   1   1   1  20   1  -1   0   2   1   1  19 3.49836     4227
   1   1   1  20   1  -1   0   2   1   1  21 3.97168     4228
   1   1   1  20   1  -1   0   2   1   1  22 6.20313     4229
   1   1   1  20   1  -1   0   2   2   1   2 5.17456     4230
   1   1   1  20   1  -1   0   2   2   1   3 6.38645     4231
   1   1   1  20   1  -1   0   2   2   1   4 6.77998     4232
   1   1   1  20   1  -1   0   2   2   1  10 6.59046     4233
   1   1   1  20   1  -1   0   2   2   1  12 6.48570     4234
   1   1   1  20   1  -1   0   2   2   1  13 5.18259     4235
   1   1   1  20   1  -1   0   2   2   1  14 4.45238     4236
   1   1   1  20   1  -1   0   2   2   1  15 5.27115     4237
   1   1   1  20   1  -1   0   2   2   1  18 4.98547     4238
   1   1   1  20   1  -1   0   2   2   1  19 3.49836     4239
   1   1   1  20   1  -1   0   2   2   1  21 4.03973     4240
   1   1   1  20   1  -1   0   2   2   1  22 6.20313     4241
   1   1   1  20   1  -1   0   2   2   1  26 4.68857     4242
   1   1   1  20   1  -1   0   2   2   1  27 3.43783     4243
   1   1   1  20   1  -1   0   2   2   1  28 3.78743     4244
   1   1   1  20   1  -1   1   3   1   1   3 5.87604     4245
   1   1   1  20   1  -1   1   3   1   1   4 5.57141     4246
   1   1   1  20   1  -1   1   3   1   1   5 4.69016     4247
   1   1   1  20   1  -1   1   3   1   1   6 3.98305     4248
   1   1   1  20   1  -1   1   3   1   1   7 4.34171     4249
   1   1   1  20   1  -1   1   3   1   1   8 5.32461     4250
   1   1   1  20   1  -1   1   3   1   1   9 6.12801     4251
   1   1   1  20   1  -1   1   3   1   1  20 6.13905     4252
   1   1   1  20   1  -1   1   3   1   1  22 6.30791     4253
   1   1   1  20   1  -1   1   3   1   1  23 4.87619     4254
   1   1   1  20   1  -1   1   3   1   1  24 3.58666     4255
   1   1   1  20   1  -1   1   3   1   1  25 4.26066     4256
   1   1   1  20   1  -1   1   3   1   1  26 6.99292     4257
   1   1   1  20   1  -1   1   3   1   1  27 5.34549     4258
   1   1   1  20   1  -1   1   3   1   1  28 6.24612     4259
   1   1   1  20   1  -1   1   3   2   1   3 5.87603     4260
   1   1   1  20   1  -1   1   3   2   1   4 5.57141     4261
   1   1   1  20   1  -1   1   3   2   1   5 4.69016     4262
   1   1   1  20   1  -1   1   3   2   1   6 3.98304     4263
   1   1   1  20   1  -1   1   3   2   1   7 4.34170     4264
   1   1   1  20   1  -1   1   3   2   1   8 5.32461     4265
   1   1   1  20   1  -1   1   3   2   1   9 6.12800     4266
   1   1   1  20   1  -1   1   3   2   1  20 6.15493     4267
   1   1   1  20   1  -1   1   3   2   1  22 6.30791     4268
   1   1   1  20   1  -1   1   3   2   1  23 4.87619     4269
   1   1   1  20   1  -1   1   3   2   1  24 3.58666     4270
   1   1   1  20   1  -1   1   3   2   1  25 4.26065     4271
   1   1   1  20   1   0   1   2   1   1  24 6.86167     4272
   1   1   1  20   1   0   1   2   2   1  24 6.86166     4273
   1   1   1  20   1   0   1   3   1   1   2 4.57081     4274
   1   1   1  20   1   0   1   3   1   1   3 4.75910     4275
   1   1   1  20   1   0   1   3   1   1   4 4.42839     4276
   1   1   1  20   1   0   1   3   1   1   5 5.21673     4277
   1   1   1  20   1   0   1   3   1   1   6 6.18047     4278
   1   1   1  20   1   0   1   3   1   1   7 6.43870     4279
   1   1   1  20   1   0   1   3   1   1   8 5.82239     4280
   1   1   1  20   1   0   1   3   1   1   9 6.56078     4281
   1   1   1  20   1   0   1   3   1   1  10 6.41223     4282
   1   1   1  20   1   0   1   3   1   1  13 6.98631     4283
   1   1   1  20   1   0   1   3   1   1  14 5.85363     4284
   1   1   1  20   1   0   1   3   1   1  15 5.47301     4285
   1   1   1  20   1   0   1   3   1   1  19 5.48537     4286
   1   1   1  20   1   0   1   3   1   1  21 3.90058     4287
   1   1   1  20   1   0   1   3   1   1  22 3.92754     4288
   1   1   1  20   1   0   1   3   1   1  23 5.37375     4289
   1   1   1  20   1   0   1   3   1   1  24 6.95323     4290
   1   1   1  20   1   0   1   3   2   1   2 4.57080     4291
   1   1   1  20   1   0   1   3   2   1   3 4.75910     4292
   1   1   1  20   1   0   1   3   2   1   4 4.42838     4293
   1   1   1  20   1   0   1   3   2   1   5 5.21673     4294
   1   1   1  20   1   0   1   3   2   1   6 6.18048     4295
   1   1   1  20   1   0   1   3   2   1   7 6.43870     4296
   1   1   1  20   1   0   1   3   2   1   8 5.82239     4297
   1   1   1  20   1   0   1   3   2   1   9 6.56078     4298
   1   1   1  20   1   0   1   3   2   1  10 6.41222     4299
   1   1   1  20   1   0   1   3   2   1  13 6.98630     4300
   1   1   1  20   1   0   1   3   2   1  14 5.85361     4301
   1   1   1  20   1   0   1   3   2   1  15 5.47300     4302
   1   1   1  20   1   0   1   3   2   1  19 5.48535     4303
   1   1   1  20   1   0   1   3   2   1  21 3.88760     4304
   1   1   1  20   1   0   1   3   2   1  22 3.92753     4305
   1   1   1  20   1   0   1   3   2   1  23 5.37375     4306
   1   1   1  20   1   0   1   3   2   1  24 6.95324     4307
   1   1   1  20   1   0   1   3   2   1  26 3.07181     4308
   1   1   1  20   1   0   1   3   2   1  27 4.62297     4309
   1   1   1  20   1   0   1   3   2   1  28 3.59803     4310
   1   1   1  21   0   0   0   2   1   1  16 6.97952     4311
   1   1   1  21   0   0   0   2   2   1  16 6.97952     4312
   1   1   1  21   0   0   0   4   1   1   3 6.82900     4313
   1   1   1  21   0   0   0   4   1   1   4 6.31493     4314
   1   1   1  21   0   0   0   4   1   1   5 5.00807     4315
   1   1   1  21   0   0   0   4   1   1   6 4.03898     4316
   1   1   1  21   0   0   0   4   1   1   7 4.72665     4317
   1   1   1  21   0   0   0   4   1   1   8 6.14440     4318
   1   1   1  21   0   0   0   4   1   1  20 6.87711     4319
   1   1   1  21   0   0   0   4   1   1  23 4.93334     4320
   1   1   1  21   0   0   0   4   1   1  24 2.97148     4321
   1   1   1  21   0   0   0   4   1   1  25 4.41913     4322
   1   1   1  21   0   0   0   4   1   1  27 6.42982     4323
   1   1   1  21   0   0   0   4   1   1  28 6.35287     4324
   1   1   1  21   0   0   0   4   2   1   3 6.82899     4325
   1   1   1  21   0   0   0   4   2   1   4 6.31493     4326
   1   1   1  21   0   0   0   4   2   1   5 5.00807     4327
   1   1   1  21   0   0   0   4   2   1   6 4.03898     4328
   1   1   1  21   0   0   0   4   2   1   7 4.72665     4329
   1   1   1  21   0   0   0   4   2   1   8 6.14440     4330
   1   1   1  21   0   0   0   4   2   1  20 6.86322     4331
   1   1   1  21   0   0   0   4   2   1  23 4.93333     4332
   1   1   1  21   0   0   0   4   2   1  24 2.97148     4333
   1   1   1  21   0   0   0   4   2   1  25 4.41914     4334
   1   1   1  21   0   1   0   1   1   1  27 6.79140     4335
   1   1   1  21   0   1   0   4   1   1  22 6.97171     4336
   1   1   1  21   0   1   0   4   2   1  22 6.97172     4337
   1   1   1  21   0   1   0   4   2   1  26 6.82692     4338
   1   1   1  21   0   1   1   4   1   1  18 6.80144     4339
   1   1   1  21   0   1   1   4   1   1  19 6.46534     4340
   1   1   1  21   0   1   1   4   2   1  18 6.80144     4341
   1   1   1  21   0   1   1   4   2   1  19 6.46534     4342
   1   1   1  21   1  -1   0   2   1   1   2 6.93522     4343
   1   1   1  21   1  -1   0   2   1   1  12 6.09891     4344
   1   1   1  21   1  -1   0   2   1   1  13 5.09578     4345
   1   1   1  21   1  -1   0   2   1   1  14 5.23324     4346
   1   1   1  21   1  -1   0   2   1   1  15 6.34845     4347
   1   1   1  21   1  -1   0   2   1   1  17 6.33130     4348
   1   1   1  21   1  -1   0   2   1   1  18 4.49859     4349
   1   1   1  21   1  -1   0   2   1   1  19 4.77740     4350
   1   1   1  21   1  -1   0   2   1   1  21 6.48784     4351
   1   1   1  21   1  -1   0   2   2   1   2 6.93522     4352
   1   1   1  21   1  -1   0   2   2   1  12 6.09892     4353
   1   1   1  21   1  -1   0   2   2   1  13 5.09578     4354
   1   1   1  21   1  -1   0   2   2   1  14 5.23324     4355
   1   1   1  21   1  -1   0   2   2   1  15 6.34845     4356
   1   1   1  21   1  -1   0   2   2   1  17 6.33130     4357
   1   1   1  21   1  -1   0   2   2   1  18 4.49860     4358
   1   1   1  21   1  -1   0   2   2   1  19 4.77740     4359
   1   1   1  21   1  -1   0   2   2   1  21 6.49545     4360
   1   1   1  21   1  -1   0   2   2   1  26 6.90049     4361
   1   1   1  21   1  -1   0   2   2   1  27 6.79711     4362
   1   1   1  21   1  -1   0   2   2   1  28 5.60460     4363
   1   1   1  21   1   0   0   1   1   1   8 6.97644     4364
   1   1   1  21   1   0   0   1   1   1   9 5.75129     4365
   1   1   1  21   1   0   0   1   1   1  10 5.05915     4366
   1   1   1  21   1   0   0   1   1   1  11 3.96864     4367
   1   1   1  21   1   0   0   1   1   1  12 3.81040     4368
   1   1   1  21   1   0   0   1   1   1  13 4.76619     4369
   1   1   1  21   1   0   0   1   1   1  14 5.66714     4370
   1   1   1  21   1   0   0   1   1   1  15 5.81777     4371
   1   1   1  21   1   0   0   1   1   1  16 3.67062     4372
   1   1   1  21   1   0   0   1   1   1  17 3.36404     4373
   1   1   1  21   1   0   0   1   1   1  18 5.06977     4374
   1   1   1  21   1   0   0   1   1   1  19 6.52398     4375
   1   1   1  21   1   0   0   1   1   1  20 5.55361     4376
   1   1   1  21   1   0   0   1   1   1  26 4.80928     4377
   1   1   1  21   1   0   0   1   1   1  27 6.46062     4378
   1   1   1  21   1   0   0   1   1   1  28 5.71974     4379
   1   1   1  21   1   0   0   1   2   1   8 6.97644     4380
   1   1   1  21   1   0   0   1   2   1   9 5.75129     4381
   1   1   1  21   1   0   0   1   2   1  10 5.05915     4382
   1   1   1  21   1   0   0   1   2   1  11 3.96864     4383
   1   1   1  21   1   0   0   1   2   1  12 3.81040     4384
   1   1   1  21   1   0   0   1   2   1  13 4.76619     4385
   1   1   1  21   1   0   0   1   2   1  14 5.66713     4386
   1   1   1  21   1   0   0   1   2   1  15 5.81777     4387
   1   1   1  21   1   0   0   1   2   1  16 3.67062     4388
   1   1   1  21   1   0   0   1   2   1  17 3.36404     4389
   1   1   1  21   1   0   0   1   2   1  18 5.06977     4390
   1   1   1  21   1   0   0   1   2   1  19 6.52398     4391
   1   1   1  21   1   0   0   1   2   1  20 5.55283     4392
   1   1   1  21   1   0   0   2   1   1   2 5.22014     4393
   1   1   1  21   1   0   0   2   1   1   3 5.38417     4394
   1   1   1  21   1   0   0   2   1   1   4 6.51942     4395
   1   1   1  21   1   0   0   2   1   1   6 6.62368     4396
   1   1   1  21   1   0   0   2   1   1   7 5.55269     4397
   1   1   1  21   1   0   0   2   1   1   8 4.78920     4398
   1   1   1  21   1   0   0   2   1   1   9 3.93842     4399
   1   1   1  21   1   0   0   2   1   1  10 3.73964     4400
   1   1   1  21   1   0   0   2   1   1  11 3.55382     4401
   1   1   1  21   1   0   0   2   1   1  12 4.12716     4402
   1   1   1  21   1   0   0   2   1   1  13 4.79560     4403
   1   1   1  21   1   0   0   2   1   1  14 4.94342     4404
   1   1   1  21   1   0   0   2   1   1  15 4.47026     4405
   1   1   1  21   1   0   0   2   1   1  16 3.50515     4406
   1   1   1  21   1   0   0   2   1   1  17 4.48308     4407
   1   1   1  21   1   0   0   2   1   1  18 5.53812     4408
   1   1   1  21   1   0   0   2   1   1  19 5.76191     4409
   1   1   1  21   1   0   0   2   1   1  20 3.97169     4410
   1   1   1  21   1   0   0   2   1   1  21 6.48782     4411
   1   1   1  21   1   0   0   2   1   1  25 5.53510     4412
   1   1   1  21   1   0   0   2   1   1  26 3.74821     4413
   1   1   1  21   1   0   0   2   1   1  27 3.70213     4414
   1   1   1  21   1   0   0   2   1   1  28 5.01359     4415
   1   1   1  21   1   0   0   2   2   1   2 5.22014     4416
   1   1   1  21   1   0   0   2   2   1   3 5.38417     4417
   1   1   1  21   1   0   0   2   2   1   4 6.51943     4418
   1   1   1  21   1   0   0   2   2   1   6 6.62369     4419
   1   1   1  21   1   0   0   2   2   1   7 5.55270     4420
   1   1   1  21   1   0   0   2   2   1   8 4.78920     4421
   1   1   1  21   1   0   0   2   2   1   9 3.93843     4422
   1   1   1  21   1   0   0   2   2   1  10 3.73965     4423
   1   1   1  21   1   0   0   2   2   1  11 3.55382     4424
   1   1   1  21   1   0   0   2   2   1  12 4.12716     4425
   1   1   1  21   1   0   0   2   2   1  13 4.79560     4426
   1   1   1  21   1   0   0   2   2   1  14 4.94341     4427
   1   1   1  21   1   0   0   2   2   1  15 4.47026     4428
   1   1   1  21   1   0   0   2   2   1  16 3.50515     4429
   1   1   1  21   1   0   0   2   2   1  17 4.48307     4430
   1   1   1  21   1   0   0   2   2   1  18 5.53812     4431
   1   1   1  21   1   0   0   2   2   1  19 5.76191     4432
   1   1   1  21   1   0   0   2   2   1  20 4.02091     4433
   1   1   1  21   1   0   0   2   2   1  21 6.44411     4434
   1   1   1  21   1   0   0   2   2   1  25 5.53511     4435
   1   1   1  21   1   0   0   2   2   1  27 6.26768     4436
   1   1   1  21   1   0   0   2   2   1  28 6.93809     4437
   1   1   1  21   1   0   0   3   1   1  13 6.95006     4438
   1   1   1  21   1   0   0   3   1   1  18 6.33721     4439
   1   1   1  21   1   0   0   3   2   1  13 6.95007     4440
   1   1   1  21   1   0   0   3   2   1  18 6.33722     4441
   1   1   1  21   1   0   0   4   1   1  28 6.37352     4442
   1   1   1  21   1   0   1   3   1   1   2 5.24896     4443
   1   1   1  21   1   0   1   3   1   1   3 4.57367     4444
   1   1   1  21   1   0   1   3   1   1   4 5.12976     4445
   1   1   1  21   1   0   1   3   1   1   5 5.03879     4446
   1   1   1  21   1   0   1   3   1   1   6 4.37272     4447
   1   1   1  21   1   0   1   3   1   1   7 3.71840     4448
   1   1   1  21   1   0   1   3   1   1   8 3.81104     4449
   1   1   1  21   1   0   1   3   1   1   9 3.87704     4450
   1   1   1  21   1   0   1   3   1   1  10 4.66340     4451
   1   1   1  21   1   0   1   3   1   1  11 5.35093     4452
   1   1   1  21   1   0   1   3   1   1  12 6.39441     4453
   1   1   1  21   1   0   1   3   1   1  13 6.86002     4454
   1   1   1  21   1   0   1   3   1   1  14 6.40211     4455
   1   1   1  21   1   0   1   3   1   1  15 5.31200     4456
   1   1   1  21   1   0   1   3   1   1  16 5.31298     4457
   1   1   1  21   1   0   1   3   1   1  20 3.90058     4458
   1   1   1  21   1   0   1   3   1   1  21 6.55504     4459
   1   1   1  21   1   0   1   3   1   1  22 5.95315     4460
   1   1   1  21   1   0   1   3   1   1  23 5.80179     4461
   1   1   1  21   1   0   1   3   1   1  24 4.76107     4462
   1   1   1  21   1   0   1   3   1   1  25 3.63935     4463
   1   1   1  21   1   0   1   3   1   1  26 4.45150     4464
   1   1   1  21   1   0   1   3   1   1  27 4.61266     4465
   1   1   1  21   1   0   1   3   1   1  28 3.05601     4466
   1   1   1  21   1   0   1   3   2   1   2 5.24895     4467
   1   1   1  21   1   0   1   3   2   1   3 4.57365     4468
   1   1   1  21   1   0   1   3   2   1   4 5.12975     4469
   1   1   1  21   1   0   1   3   2   1   5 5.03878     4470
   1   1   1  21   1   0   1   3   2   1   6 4.37272     4471
   1   1   1  21   1   0   1   3   2   1   7 3.71840     4472
   1   1   1  21   1   0   1   3   2   1   8 3.81103     4473
   1   1   1  21   1   0   1   3   2   1   9 3.87704     4474
   1   1   1  21   1   0   1   3   2   1  10 4.66339     4475
   1   1   1  21   1   0   1   3   2   1  11 5.35093     4476
   1   1   1  21   1   0   1   3   2   1  12 6.39441     4477
   1   1   1  21   1   0   1   3   2   1  13 6.86001     4478
   1   1   1  21   1   0   1   3   2   1  14 6.40209     4479
   1   1   1  21   1   0   1   3   2   1  15 5.31199     4480
   1   1   1  21   1   0   1   3   2   1  16 5.31298     4481
   1   1   1  21   1   0   1   3   2   1  20 3.88770     4482
   1   1   1  21   1   0   1   3   2   1  21 6.47366     4483
   1   1   1  21   1   0   1   3   2   1  22 5.95313     4484
   1   1   1  21   1   0   1   3   2   1  23 5.80178     4485
   1   1   1  21   1   0   1   3   2   1  24 4.76107     4486
   1   1   1  21   1   0   1   3   2   1  25 3.63935     4487
   1   1   1  21   1   0   1   3   2   1  26 6.36550     4488
   1   1   1  21   1   0   1   3   2   1  28 6.66067     4489
   1   1   1  21   1   1   0   1   1   1  26 6.86179     4490
   1   1   1  21   1   1   0   1   1   1  27 6.66321     4491
   1   1   1  21   1   1   1   4   1   1  17 6.69932     4492
   1   1   1  21   1   1   1   4   1   1  18 6.09945     4493
   1   1   1  21   1   1   1   4   2   1  17 6.69931     4494
   1   1   1  21   1   1   1   4   2   1  18 6.09944     4495
   1   1   1  21   2  -1   0   2   1   1  21 6.99287     4496
   1   1   1  21   2  -1   0   2   2   1  26 6.83075     4497
   1   1   1  21   2  -1   0   2   2   1  27 6.87075     4498
   1   1   1  21   2  -1   0   2   2   1  28 6.63994     4499
   1   1   1  21   2   0   0   2   1   1   4 6.82638     4500
   1   1   1  21   2   0   0   2   1   1  21 6.99286     4501
   1   1   1  21   2   0   0   2   1   1  22 6.49031     4502
   1   1   1  21   2   0   0   2   2   1   4 6.82639     4503
   1   1   1  21   2   0   0   2   2   1  22 6.49032     4504
   1   1   1  21   2   0   0   2   2   1  27 6.34746     4505
   1   1   1  21   2   0   1   3   1   1   2 6.68524     4506
   1   1   1  21   2   0   1   3   1   1   3 5.88859     4507
   1   1   1  21   2   0   1   3   1   1   4 4.48005     4508
   1   1   1  21   2   0   1   3   1   1   5 4.05291     4509
   1   1   1  21   2   0   1   3   1   1   6 5.20393     4510
   1   1   1  21   2   0   1   3   1   1   7 6.41812     4511
   1   1   1  21   2   0   1   3   1   1   8 6.75640     4512
   1   1   1  21   2   0   1   3   1   1  21 6.27985     4513
   1   1   1  21   2   0   1   3   1   1  22 3.99415     4514
   1   1   1  21   2   0   1   3   1   1  23 3.07691     4515
   1   1   1  21   2   0   1   3   1   1  24 5.31685     4516
   1   1   1  21   2   0   1   3   2   1   2 6.68523     4517
   1   1   1  21   2   0   1   3   2   1   3 5.88859     4518
   1   1   1  21   2   0   1   3   2   1   4 4.48004     4519
   1   1   1  21   2   0   1   3   2   1   5 4.05291     4520
   1   1   1  21   2   0   1   3   2   1   6 5.20393     4521
   1   1   1  21   2   0   1   3   2   1   7 6.41812     4522
   1   1   1  21   2   0   1   3   2   1   8 6.75639     4523
   1   1   1  21   2   0   1   3   2   1  21 6.27296     4524
   1   1   1  21   2   0   1   3   2   1  22 3.99414     4525
   1   1   1  21   2   0   1   3   2   1  23 3.07692     4526
   1   1   1  21   2   0   1   3   2   1  24 5.31686     4527
   1   1   1  21   2   0   1   3   2   1  26 5.40572     4528
   1   1   1  21   2   0   1   3   2   1  27 6.52037     4529
   1   1   1  21   2   0   1   3   2   1  28 6.83386     4530
   1   1   1  22   0   0   0   4   1   1   5 5.85463     4531
   1   1   1  22   0   0   0   4   1   1   6 5.31203     4532
   1   1   1  22   0   0   0   4   1   1   7 6.26825     4533
   1   1   1  22   0   0   0   4   1   1  23 5.43211     4534
   1   1   1  22   0   0   0   4   1   1  24 4.33683     4535
   1   1   1  22   0   0   0   4   1   1  25 6.20413     4536
   1   1   1  22   0   0   0   4   2   1   5 5.85463     4537
   1   1   1  22   0   0   0   4   2   1   6 5.31203     4538
   1   1   1  22   0   0   0   4   2   1   7 6.26826     4539
   1   1   1  22   0   0   0   4   2   1  23 5.43211     4540
   1   1   1  22   0   0   0   4   2   1  24 4.33684     4541
   1   1   1  22   0   0   0   4   2   1  25 6.20414     4542
   1   1   1  22   0   0   1   4   2   1  27 6.36771     4543
   1   1   1  22   0   1   1   4   1   1  19 6.37325     4544
   1   1   1  22   0   1   1   4   1   1  21 6.97174     4545
   1   1   1  22   0   1   1   4   2   1  19 6.37325     4546
   1   1   1  22   0   1   1   4   2   1  27 6.73464     4547
   1   1   1  22   0   1   1   4   2   1  28 6.41550     4548
   1   1   1  22   1  -1   0   2   1   1  11 6.52233     4549
   1   1   1  22   1  -1   0   2   1   1  12 5.26521     4550
   1   1   1  22   1  -1   0   2   1   1  13 4.38521     4551
   1   1   1  22   1  -1   0   2   1   1  14 5.06111     4552
   1   1   1  22   1  -1   0   2   1   1  15 6.40936     4553
   1   1   1  22   1  -1   0   2   1   1  17 5.15992     4554
   1   1   1  22   1  -1   0   2   1   1  18 3.41209     4555
   1   1   1  22   1  -1   0   2   1   1  19 4.80418     4556
   1   1   1  22   1  -1   0   2   2   1  11 6.52233     4557
   1   1   1  22   1  -1   0   2   2   1  12 5.26521     4558
   1   1   1  22   1  -1   0   2   2   1  13 4.38521     4559
   1   1   1  22   1  -1   0   2   2   1  14 5.06111     4560
   1   1   1  22   1  -1   0   2   2   1  15 6.40936     4561
   1   1   1  22   1  -1   0   2   2   1  17 5.15993     4562
   1   1   1  22   1  -1   0   2   2   1  18 3.41209     4563
   1   1   1  22   1  -1   0   2   2   1  19 4.80417     4564
   1   1   1  22   1  -1   0   2   2   1  28 6.44452     4565
   1   1   1  22   1  -1   1   3   1   1  20 6.30791     4566
   1   1   1  22   1  -1   1   3   1   1  25 6.26318     4567
   1   1   1  22   1  -1   1   3   1   1  26 6.47157     4568
   1   1   1  22   1  -1   1   3   1   1  27 5.40758     4569
   1   1   1  22   1  -1   1   3   1   1  28 6.37546     4570
   1   1   1  22   1  -1   1   3   2   1  20 6.26021     4571
   1   1   1  22   1  -1   1   3   2   1  25 6.26317     4572
   1   1   1  22   1   0   0   1   1   1   2 6.15841     4573
   1   1   1  22   1   0   0   1   1   1   3 6.21643     4574
   1   1   1  22   1   0   0   1   1   1   7 5.94076     4575
   1   1   1  22   1   0   0   1   1   1   8 5.32931     4576
   1   1   1  22   1   0   0   1   1   1   9 4.24168     4577
   1   1   1  22   1   0   0   1   1   1  10 4.18073     4578
   1   1   1  22   1   0   0   1   1   1  11 3.62243     4579
   1   1   1  22   1   0   0   1   1   1  12 4.31022     4580
   1   1   1  22   1   0   0   1   1   1  13 5.33933     4581
   1   1   1  22   1   0   0   1   1   1  14 5.74008     4582
   1   1   1  22   1   0   0   1   1   1  15 5.25484     4583
   1   1   1  22   1   0   0   1   1   1  16 3.10401     4584
   1   1   1  22   1   0   0   1   1   1  17 4.40541     4585
   1   1   1  22   1   0   0   1   1   1  18 6.06937     4586
   1   1   1  22   1   0   0   1   1   1  19 6.69555     4587
   1   1   1  22   1   0   0   1   1   1  20 3.70825     4588
   1   1   1  22   1   0   0   1   1   1  25 5.65904     4589
   1   1   1  22   1   0   0   1   1   1  26 3.20120     4590
   1   1   1  22   1   0   0   1   1   1  27 4.65424     4591
   1   1   1  22   1   0   0   1   1   1  28 3.51446     4592
   1   1   1  22   1   0   0   1   2   1   2 6.15841     4593
   1   1   1  22   1   0   0   1   2   1   3 6.21643     4594
   1   1   1  22   1   0   0   1   2   1   7 5.94076     4595
   1   1   1  22   1   0   0   1   2   1   8 5.32931     4596
   1   1   1  22   1   0   0   1   2   1   9 4.24168     4597
   1   1   1  22   1   0   0   1   2   1  10 4.18073     4598
   1   1   1  22   1   0   0   1   2   1  11 3.62243     4599
   1   1   1  22   1   0   0   1   2   1  12 4.31022     4600
   1   1   1  22   1   0   0   1   2   1  13 5.33933     4601
   1   1   1  22   1   0   0   1   2   1  14 5.74008     4602
   1   1   1  22   1   0   0   1   2   1  15 5.25484     4603
   1   1   1  22   1   0   0   1   2   1  16 3.10401     4604
   1   1   1  22   1   0   0   1   2   1  17 4.40541     4605
   1   1   1  22   1   0   0   1   2   1  18 6.06937     4606
   1   1   1  22   1   0   0   1   2   1  19 6.69555     4607
   1   1   1  22   1   0   0   1   2   1  20 3.68475     4608
   1   1   1  22   1   0   0   1   2   1  25 5.65904     4609
   1   1   1  22   1   0   0   2   1   1   9 6.43873     4610
   1   1   1  22   1   0   0   2   1   1  10 6.12073     4611
   1   1   1  22   1   0   0   2   1   1  11 5.55321     4612
   1   1   1  22   1   0   0   2   1   1  12 5.74099     4613
   1   1   1  22   1   0   0   2   1   1  13 6.45452     4614
   1   1   1  22   1   0   0   2   1   1  14 6.93291     4615
   1   1   1  22   1   0   0   2   1   1  15 6.79412     4616
   1   1   1  22   1   0   0   2   1   1  16 5.32181     4617
   1   1   1  22   1   0   0   2   1   1  17 5.66016     4618
   1   1   1  22   1   0   0   2   1   1  18 6.89026     4619
   1   1   1  22   1   0   0   2   1   1  20 6.20314     4620
   1   1   1  22   1   0   0   2   1   1  26 5.74332     4621
   1   1   1  22   1   0   0   2   1   1  27 5.85676     4622
   1   1   1  22   1   0   0   2   2   1   9 6.43874     4623
   1   1   1  22   1   0   0   2   2   1  10 6.12074     4624
   1   1   1  22   1   0   0   2   2   1  11 5.55321     4625
   1   1   1  22   1   0   0   2   2   1  12 5.74099     4626
   1   1   1  22   1   0   0   2   2   1  13 6.45451     4627
   1   1   1  22   1   0   0   2   2   1  14 6.93291     4628
   1   1   1  22   1   0   0   2   2   1  15 6.79412     4629
   1   1   1  22   1   0   0   2   2   1  16 5.32181     4630
   1   1   1  22   1   0   0   2   2   1  17 5.66015     4631
   1   1   1  22   1   0   0   2   2   1  18 6.89026     4632
   1   1   1  22   1   0   0   2   2   1  20 6.23415     4633
   1   1   1  22   1   0   0   4   1   1  28 6.96614     4634
   1   1   1  22   1   0   1   3   1   1   2 4.71112     4635
   1   1   1  22   1   0   1   3   1   1   3 4.74817     4636
   1   1   1  22   1   0   1   3   1   1   4 5.76891     4637
   1   1   1  22   1   0   1   3   1   1   5 6.25440     4638
   1   1   1  22   1   0   1   3   1   1   6 5.88140     4639
   1   1   1  22   1   0   1   3   1   1   7 4.93174     4640
   1   1   1  22   1   0   1   3   1   1   8 4.23235     4641
   1   1   1  22   1   0   1   3   1   1   9 3.63819     4642
   1   1   1  22   1   0   1   3   1   1  10 3.60325     4643
   1   1   1  22   1   0   1   3   1   1  11 3.79212     4644
   1   1   1  22   1   0   1   3   1   1  12 4.46645     4645
   1   1   1  22   1   0   1   3   1   1  13 4.93838     4646
   1   1   1  22   1   0   1   3   1   1  14 4.82435     4647
   1   1   1  22   1   0   1   3   1   1  15 4.19166     4648
   1   1   1  22   1   0   1   3   1   1  16 3.89691     4649
   1   1   1  22   1   0   1   3   1   1  17 5.01673     4650
   1   1   1  22   1   0   1   3   1   1  18 5.73633     4651
   1   1   1  22   1   0   1   3   1   1  19 5.56547     4652
   1   1   1  22   1   0   1   3   1   1  20 3.92753     4653
   1   1   1  22   1   0   1   3   1   1  21 5.95315     4654
   1   1   1  22   1   0   1   3   1   1  22 6.41227     4655
   1   1   1  22   1   0   1   3   1   1  24 6.59414     4656
   1   1   1  22   1   0   1   3   1   1  25 5.02170     4657
   1   1   1  22   1   0   1   3   1   1  26 3.97705     4658
   1   1   1  22   1   0   1   3   1   1  27 4.94709     4659
   1   1   1  22   1   0   1   3   1   1  28 3.58090     4660
   1   1   1  22   1   0   1   3   2   1   2 4.71111     4661
   1   1   1  22   1   0   1   3   2   1   3 4.74817     4662
   1   1   1  22   1   0   1   3   2   1   4 5.76890     4663
   1   1   1  22   1   0   1   3   2   1   5 6.25440     4664
   1   1   1  22   1   0   1   3   2   1   6 5.88140     4665
   1   1   1  22   1   0   1   3   2   1   7 4.93174     4666
   1   1   1  22   1   0   1   3   2   1   8 4.23235     4667
   1   1   1  22   1   0   1   3   2   1   9 3.63819     4668
   1   1   1  22   1   0   1   3   2   1  10 3.60325     4669
   1   1   1  22   1   0   1   3   2   1  11 3.79212     4670
   1   1   1  22   1   0   1   3   2   1  12 4.46645     4671
   1   1   1  22   1   0   1   3   2   1  13 4.93837     4672
   1   1   1  22   1   0   1   3   2   1  14 4.82434     4673
   1   1   1  22   1   0   1   3   2   1  15 4.19165     4674
   1   1   1  22   1   0   1   3   2   1  16 3.89691     4675
   1   1   1  22   1   0   1   3   2   1  17 5.01673     4676
   1   1   1  22   1   0   1   3   2   1  18 5.73632     4677
   1   1   1  22   1   0   1   3   2   1  19 5.56546     4678
   1   1   1  22   1   0   1   3   2   1  20 3.93577     4679
   1   1   1  22   1   0   1   3   2   1  21 5.87753     4680
   1   1   1  22   1   0   1   3   2   1  22 6.41226     4681
   1   1   1  22   1   0   1   3   2   1  24 6.59414     4682
   1   1   1  22   1   0   1   3   2   1  25 5.02171     4683
   1   1   1  22   1   0   1   3   2   1  26 6.06304     4684
   1   1   1  22   1   0   1   3   2   1  27 6.58151     4685
   1   1   1  22   1   0   1   3   2   1  28 5.78178     4686
   1   1   1  22   1   0   1   4   1   1  10 6.59883     4687
   1   1   1  22   1   0   1   4   1   1  11 5.56469     4688
   1   1   1  22   1   0   1   4   1   1  12 5.37915     4689
   1   1   1  22   1   0   1   4   1   1  13 6.24740     4690
   1   1   1  22   1   0   1   4   1   1  16 5.22099     4691
   1   1   1  22   1   0   1   4   1   1  17 4.85621     4692
   1   1   1  22   1   0   1   4   1   1  18 6.43899     4693
   1   1   1  22   1   0   1   4   1   1  20 6.87965     4694
   1   1   1  22   1   0   1   4   1   1  26 6.12669     4695
   1   1   1  22   1   0   1   4   1   1  27 6.83278     4696
   1   1   1  22   1   0   1   4   2   1  10 6.59883     4697
   1   1   1  22   1   0   1   4   2   1  11 5.56469     4698
   1   1   1  22   1   0   1   4   2   1  12 5.37916     4699
   1   1   1  22   1   0   1   4   2   1  13 6.24741     4700
   1   1   1  22   1   0   1   4   2   1  16 5.22100     4701
   1   1   1  22   1   0   1   4   2   1  17 4.85623     4702
   1   1   1  22   1   0   1   4   2   1  18 6.43899     4703
   1   1   1  22   1   0   1   4   2   1  20 6.90183     4704
   1   1   1  22   1   1   1   4   1   1  12 6.85488     4705
   1   1   1  22   1   1   1   4   1   1  13 6.31585     4706
   1   1   1  22   1   1   1   4   1   1  17 6.43902     4707
   1   1   1  22   1   1   1   4   1   1  18 5.37754     4708
   1   1   1  22   1   1   1   4   2   1  12 6.85487     4709
   1   1   1  22   1   1   1   4   2   1  13 6.31585     4710
   1   1   1  22   1   1   1   4   2   1  17 6.43901     4711
   1   1   1  22   1   1   1   4   2   1  18 5.37753     4712
   1   1   1  22   2  -1   0   2   1   1  19 6.71969     4713
   1   1   1  22   2  -1   0   2   1   1  21 6.49032     4714
   1   1   1  22   2  -1   0   2   2   1  19 6.71970     4715
   1   1   1  22   2  -1   0   2   2   1  21 6.57190     4716
   1   1   1  22   2  -1   0   2   2   1  26 6.70848     4717
   1   1   1  22   2  -1   0   2   2   1  27 6.13421     4718
   1   1   1  22   2  -1   0   2   2   1  28 6.18501     4719
   1   1   1  22   2  -1   1   3   1   1  24 6.90539     4720
   1   1   1  22   2  -1   1   3   2   1  24 6.90539     4721
   1   1   1  22   2   0   1   2   1   1   6 6.97060     4722
   1   1   1  22   2   0   1   2   1   1  23 6.64000     4723
   1   1   1  22   2   0   1   2   1   1  24 5.98551     4724
   1   1   1  22   2   0   1   2   2   1   6 6.97060     4725
   1   1   1  22   2   0   1   2   2   1  23 6.63999     4726
   1   1   1  22   2   0   1   2   2   1  24 5.98551     4727
   1   1   1  22   2   0   1   3   1   1   2 4.83536     4728
   1   1   1  22   2   0   1   3   1   1   3 4.51082     4729
   1   1   1  22   2   0   1   3   1   1   4 3.32895     4730
   1   1   1  22   2   0   1   3   1   1   5 3.76821     4731
   1   1   1  22   2   0   1   3   1   1   6 5.15716     4732
   1   1   1  22   2   0   1   3   1   1   7 5.97772     4733
   1   1   1  22   2   0   1   3   1   1   8 5.75177     4734
   1   1   1  22   2   0   1   3   1   1   9 6.95341     4735
   1   1   1  22   2   0   1   3   1   1  14 6.92078     4736
   1   1   1  22   2   0   1   3   1   1  15 6.21837     4737
   1   1   1  22   2   0   1   3   1   1  19 6.53516     4738
   1   1   1  22   2   0   1   3   1   1  21 3.99415     4739
   1   1   1  22   2   0   1   3   1   1  22 2.38237     4740
   1   1   1  22   2   0   1   3   1   1  23 3.35207     4741
   1   1   1  22   2   0   1   3   1   1  24 5.75578     4742
   1   1   1  22   2   0   1   3   2   1   2 4.83535     4743
   1   1   1  22   2   0   1   3   2   1   3 4.51082     4744
   1   1   1  22   2   0   1   3   2   1   4 3.32895     4745
   1   1   1  22   2   0   1   3   2   1   5 3.76822     4746
   1   1   1  22   2   0   1   3   2   1   6 5.15717     4747
   1   1   1  22   2   0   1   3   2   1   7 5.97772     4748
   1   1   1  22   2   0   1   3   2   1   8 5.75178     4749
   1   1   1  22   2   0   1   3   2   1   9 6.95340     4750
   1   1   1  22   2   0   1   3   2   1  14 6.92077     4751
   1   1   1  22   2   0   1   3   2   1  15 6.21837     4752
   1   1   1  22   2   0   1   3   2   1  19 6.53515     4753
   1   1   1  22   2   0   1   3   2   1  21 4.00404     4754
   1   1   1  22   2   0   1   3   2   1  22 2.38237     4755
   1   1   1  22   2   0   1   3   2   1  23 3.35208     4756
   1   1   1  22   2   0   1   3   2   1  24 5.75580     4757
   1   1   1  22   2   0   1   3   2   1  26 3.08348     4758
   1   1   1  22   2   0   1   3   2   1  27 4.24589     4759
   1   1   1  22   2   0   1   3   2   1  28 4.45099     4760
   1   1   1  23   0   0   0   4   1   1  23 6.83495     4761
   1   1   1  23   0   0   0   4   1   1  24 6.25150     4762
   1   1   1  23   0   0   0   4   2   1  23 6.83495     4763
   1   1   1  23   0   0   0   4   2   1  24 6.25150     4764
   1   1   1  23   0   0   1   4   1   1   2 5.22099     4765
   1   1   1  23   0   0   1   4   1   1   3 5.55640     4766
   1   1   1  23   0   0   1   4   1   1   4 5.66047     4767
   1   1   1  23   0   0   1   4   1   1   5 6.45020     4768
   1   1   1  23   0   0   1   4   1   1   8 6.30163     4769
   1   1   1  23   0   0   1   4   1   1   9 6.68486     4770
   1   1   1  23   0   0   1   4   1   1  10 6.40753     4771
   1   1   1  23   0   0   1   4   1   1  13 6.74892     4772
   1   1   1  23   0   0   1   4   1   1  14 5.90814     4773
   1   1   1  23   0   0   1   4   1   1  15 5.68216     4774
   1   1   1  23   0   0   1   4   1   1  19 5.70366     4775
   1   1   1  23   0   0   1   4   1   1  21 4.93336     4776
   1   1   1  23   0   0   1   4   1   1  22 5.43216     4777
   1   1   1  23   0   0   1   4   1   1  23 6.83500     4778
   1   1   1  23   0   0   1   4   2   1   2 5.22099     4779
   1   1   1  23   0   0   1   4   2   1   3 5.55640     4780
   1   1   1  23   0   0   1   4   2   1   4 5.66046     4781
   1   1   1  23   0   0   1   4   2   1   5 6.45019     4782
   1   1   1  23   0   0   1   4   2   1   8 6.30163     4783
   1   1   1  23   0   0   1   4   2   1   9 6.68487     4784
   1   1   1  23   0   0   1   4   2   1  10 6.40754     4785
   1   1   1  23   0   0   1   4   2   1  13 6.74893     4786
   1   1   1  23   0   0   1   4   2   1  14 5.90815     4787
   1   1   1  23   0   0   1   4   2   1  15 5.68217     4788
   1   1   1  23   0   0   1   4   2   1  19 5.70366     4789
   1   1   1  23   0   0   1   4   2   1  21 4.96062     4790
   1   1   1  23   0   0   1   4   2   1  22 5.43215     4791
   1   1   1  23   0   0   1   4   2   1  23 6.83500     4792
   1   1   1  23   0   0   1   4   2   1  26 5.52233     4793
   1   1   1  23   0   0   1   4   2   1  27 4.18206     4794
   1   1   1  23   0   0   1   4   2   1  28 5.64029     4795
   1   1   1  23   0   1   1   4   2   1  28 6.51476     4796
   1   1   1  23   1  -1   0   2   1   1  11 6.72007     4797
   1   1   1  23   1  -1   0   2   1   1  12 5.36722     4798
   1   1   1  23   1  -1   0   2   1   1  13 4.69694     4799
   1   1   1  23   1  -1   0   2   1   1  14 5.62787     4800
   1   1   1  23   1  -1   0   2   1   1  15 6.98840     4801
   1   1   1  23   1  -1   0   2   1   1  17 5.01008     4802
   1   1   1  23   1  -1   0   2   1   1  18 3.63912     4803
   1   1   1  23   1  -1   0   2   1   1  19 5.51539     4804
   1   1   1  23   1  -1   0   2   2   1  11 6.72008     4805
   1   1   1  23   1  -1   0   2   2   1  12 5.36723     4806
   1   1   1  23   1  -1   0   2   2   1  13 4.69694     4807
   1   1   1  23   1  -1   0   2   2   1  14 5.62788     4808
   1   1   1  23   1  -1   0   2   2   1  15 6.98840     4809
   1   1   1  23   1  -1   0   2   2   1  17 5.01008     4810
   1   1   1  23   1  -1   0   2   2   1  18 3.63912     4811
   1   1   1  23   1  -1   0   2   2   1  19 5.51539     4812
   1   1   1  23   1  -1   1   3   1   1   7 6.48742     4813
   1   1   1  23   1  -1   1   3   1   1   8 6.76634     4814
   1   1   1  23   1  -1   1   3   1   1   9 6.14592     4815
   1   1   1  23   1  -1   1   3   1   1  10 6.92483     4816
   1   1   1  23   1  -1   1   3   1   1  11 6.81923     4817
   1   1   1  23   1  -1   1   3   1   1  16 6.06968     4818
   1   1   1  23   1  -1   1   3   1   1  20 4.87619     4819
   1   1   1  23   1  -1   1   3   1   1  25 5.68606     4820
   1   1   1  23   1  -1   1   3   1   1  26 4.78250     4821
   1   1   1  23   1  -1   1   3   1   1  27 4.02261     4822
   1   1   1  23   1  -1   1   3   1   1  28 5.28242     4823
   1   1   1  23   1  -1   1   3   2   1   7 6.48742     4824
   1   1   1  23   1  -1   1   3   2   1   8 6.76634     4825
   1   1   1  23   1  -1   1   3   2   1   9 6.14591     4826
   1   1   1  23   1  -1   1   3   2   1  10 6.92483     4827
   1   1   1  23   1  -1   1   3   2   1  11 6.81922     4828
   1   1   1  23   1  -1   1   3   2   1  16 6.06968     4829
   1   1   1  23   1  -1   1   3   2   1  20 4.84042     4830
   1   1   1  23   1  -1   1   3   2   1  25 5.68605     4831
   1   1   1  23   1   0   0   1   1   1   2 6.85410     4832
   1   1   1  23   1   0   0   1   1   1   3 6.39014     4833
   1   1   1  23   1   0   0   1   1   1   6 6.29861     4834
   1   1   1  23   1   0   0   1   1   1   7 5.19819     4835
   1   1   1  23   1   0   0   1   1   1   8 5.20401     4836
   1   1   1  23   1   0   0   1   1   1   9 4.47931     4837
   1   1   1  23   1   0   0   1   1   1  10 5.14097     4838
   1   1   1  23   1   0   0   1   1   1  11 5.07556     4839
   1   1   1  23   1   0   0   1   1   1  12 6.15306     4840
   1   1   1  23   1   0   0   1   1   1  15 6.33838     4841
   1   1   1  23   1   0   0   1   1   1  16 4.44157     4842
   1   1   1  23   1   0   0   1   1   1  17 6.43051     4843
   1   1   1  23   1   0   0   1   1   1  20 3.43866     4844
   1   1   1  23   1   0   0   1   1   1  24 6.59618     4845
   1   1   1  23   1   0   0   1   1   1  25 4.58058     4846
   1   1   1  23   1   0   0   1   1   1  26 3.36414     4847
   1   1   1  23   1   0   0   1   1   1  27 4.09675     4848
   1   1   1  23   1   0   0   1   1   1  28 2.67484     4849
   1   1   1  23   1   0   0   1   2   1   2 6.85410     4850
   1   1   1  23   1   0   0   1   2   1   3 6.39014     4851
   1   1   1  23   1   0   0   1   2   1   6 6.29861     4852
   1   1   1  23   1   0   0   1   2   1   7 5.19819     4853
   1   1   1  23   1   0   0   1   2   1   8 5.20401     4854
   1   1   1  23   1   0   0   1   2   1   9 4.47930     4855
   1   1   1  23   1   0   0   1   2   1  10 5.14097     4856
   1   1   1  23   1   0   0   1   2   1  11 5.07556     4857
   1   1   1  23   1   0   0   1   2   1  12 6.15306     4858
   1   1   1  23   1   0   0   1   2   1  15 6.33838     4859
   1   1   1  23   1   0   0   1   2   1  16 4.44157     4860
   1   1   1  23   1   0   0   1   2   1  17 6.43051     4861
   1   1   1  23   1   0   0   1   2   1  20 3.37621     4862
   1   1   1  23   1   0   0   1   2   1  24 6.59618     4863
   1   1   1  23   1   0   0   1   2   1  25 4.58058     4864
   1   1   1  23   1   0   1   2   1   1  25 6.44811     4865
   1   1   1  23   1   0   1   2   1   1  27 6.91403     4866
   1   1   1  23   1   0   1   2   1   1  28 6.52797     4867
   1   1   1  23   1   0   1   2   2   1  25 6.44810     4868
   1   1   1  23   1   0   1   3   1   1   2 4.96658     4869
   1   1   1  23   1   0   1   3   1   1   3 5.64626     4870
   1   1   1  23   1   0   1   3   1   1   4 6.79425     4871
   1   1   1  23   1   0   1   3   1   1   7 6.64218     4872
   1   1   1  23   1   0   1   3   1   1   8 5.54595     4873
   1   1   1  23   1   0   1   3   1   1   9 4.76331     4874
   1   1   1  23   1   0   1   3   1   1  10 3.94428     4875
   1   1   1  23   1   0   1   3   1   1  11 3.64222     4876
   1   1   1  23   1   0   1   3   1   1  12 3.49171     4877
   1   1   1  23   1   0   1   3   1   1  13 3.63197     4878
   1   1   1  23   1   0   1   3   1   1  14 3.91141     4879
   1   1   1  23   1   0   1   3   1   1  15 4.06611     4880
   1   1   1  23   1   0   1   3   1   1  16 4.07654     4881
   1   1   1  23   1   0   1   3   1   1  17 3.84042     4882
   1   1   1  23   1   0   1   3   1   1  18 4.05420     4883
   1   1   1  23   1   0   1   3   1   1  19 4.50127     4884
   1   1   1  23   1   0   1   3   1   1  20 5.37375     4885
   1   1   1  23   1   0   1   3   1   1  21 5.80179     4886
   1   1   1  23   1   0   1   3   1   1  25 6.91271     4887
   1   1   1  23   1   0   1   3   1   1  26 5.12564     4888
   1   1   1  23   1   0   1   3   1   1  27 6.39354     4889
   1   1   1  23   1   0   1   3   1   1  28 5.43548     4890
   1   1   1  23   1   0   1   3   2   1   2 4.96658     4891
   1   1   1  23   1   0   1   3   2   1   3 5.64625     4892
   1   1   1  23   1   0   1   3   2   1   4 6.79425     4893
   1   1   1  23   1   0   1   3   2   1   7 6.64218     4894
   1   1   1  23   1   0   1   3   2   1   8 5.54595     4895
   1   1   1  23   1   0   1   3   2   1   9 4.76331     4896
   1   1   1  23   1   0   1   3   2   1  10 3.94428     4897
   1   1   1  23   1   0   1   3   2   1  11 3.64222     4898
   1   1   1  23   1   0   1   3   2   1  12 3.49171     4899
   1   1   1  23   1   0   1   3   2   1  13 3.63196     4900
   1   1   1  23   1   0   1   3   2   1  14 3.91140     4901
   1   1   1  23   1   0   1   3   2   1  15 4.06610     4902
   1   1   1  23   1   0   1   3   2   1  16 4.07655     4903
   1   1   1  23   1   0   1   3   2   1  17 3.84041     4904
   1   1   1  23   1   0   1   3   2   1  18 4.05419     4905
   1   1   1  23   1   0   1   3   2   1  19 4.50126     4906
   1   1   1  23   1   0   1   3   2   1  20 5.40314     4907
   1   1   1  23   1   0   1   3   2   1  21 5.74618     4908
   1   1   1  23   1   0   1   3   2   1  25 6.91271     4909
   1   1   1  23   1   0   1   3   2   1  26 6.15123     4910
   1   1   1  23   1   0   1   3   2   1  27 6.34862     4911
   1   1   1  23   1   0   1   3   2   1  28 5.33008     4912
   1   1   1  23   1   0   1   4   1   1   2 6.54026     4913
   1   1   1  23   1   0   1   4   1   1   8 6.42204     4914
   1   1   1  23   1   0   1   4   1   1   9 5.12604     4915
   1   1   1  23   1   0   1   4   1   1  10 4.42176     4916
   1   1   1  23   1   0   1   4   1   1  11 3.22615     4917
   1   1   1  23   1   0   1   4   1   1  12 3.14826     4918
   1   1   1  23   1   0   1   4   1   1  13 4.27314     4919
   1   1   1  23   1   0   1   4   1   1  14 5.19478     4920
   1   1   1  23   1   0   1   4   1   1  15 5.28122     4921
   1   1   1  23   1   0   1   4   1   1  16 2.84238     4922
   1   1   1  23   1   0   1   4   1   1  17 2.67725     4923
   1   1   1  23   1   0   1   4   1   1  18 4.68195     4924
   1   1   1  23   1   0   1   4   1   1  19 6.12375     4925
   1   1   1  23   1   0   1   4   1   1  20 4.87524     4926
   1   1   1  23   1   0   1   4   1   1  26 4.05689     4927
   1   1   1  23   1   0   1   4   1   1  27 5.10718     4928
   1   1   1  23   1   0   1   4   1   1  28 5.77639     4929
   1   1   1  23   1   0   1   4   2   1   2 6.54026     4930
   1   1   1  23   1   0   1   4   2   1   8 6.42204     4931
   1   1   1  23   1   0   1   4   2   1   9 5.12604     4932
   1   1   1  23   1   0   1   4   2   1  10 4.42176     4933
   1   1   1  23   1   0   1   4   2   1  11 3.22616     4934
   1   1   1  23   1   0   1   4   2   1  12 3.14826     4935
   1   1   1  23   1   0   1   4   2   1  13 4.27314     4936
   1   1   1  23   1   0   1   4   2   1  14 5.19478     4937
   1   1   1  23   1   0   1   4   2   1  15 5.28121     4938
   1   1   1  23   1   0   1   4   2   1  16 2.84239     4939
   1   1   1  23   1   0   1   4   2   1  17 2.67727     4940
   1   1   1  23   1   0   1   4   2   1  18 4.68195     4941
   1   1   1  23   1   0   1   4   2   1  19 6.12375     4942
   1   1   1  23   1   0   1   4   2   1  20 4.90122     4943
   1   1   1  23   1   1   1   4   1   1  13 6.97021     4944
   1   1   1  23   1   1   1   4   1   1  18 6.23234     4945
   1   1   1  23   1   1   1   4   2   1  13 6.97020     4946
   1   1   1  23   1   1   1   4   2   1  18 6.23234     4947
   1   1   1  23   2  -1   0   2   1   1  19 6.91282     4948
   1   1   1  23   2  -1   0   2   2   1  19 6.91282     4949
   1   1   1  23   2  -1   0   2   2   1  27 6.53816     4950
   1   1   1  23   2  -1   0   2   2   1  28 6.96390     4951
   1   1   1  23   2  -1   1   2   1   1   4 6.93763     4952
   1   1   1  23   2  -1   1   2   1   1   5 6.71010     4953
   1   1   1  23   2  -1   1   2   1   1  22 6.64001     4954
   1   1   1  23   2  -1   1   2   1   1  23 6.19724     4955
   1   1   1  23   2  -1   1   2   2   1   4 6.93763     4956
   1   1   1  23   2  -1   1   2   2   1   5 6.71009     4957
   1   1   1  23   2  -1   1   2   2   1  22 6.64000     4958
   1   1   1  23   2  -1   1   2   2   1  23 6.19723     4959
   1   1   1  23   2  -1   1   3   1   1   5 6.66522     4960
   1   1   1  23   2  -1   1   3   1   1   6 6.56906     4961
   1   1   1  23   2  -1   1   3   1   1   7 6.98505     4962
   1   1   1  23   2  -1   1   3   1   1  23 6.64832     4963
   1   1   1  23   2  -1   1   3   1   1  24 6.46598     4964
   1   1   1  23   2  -1   1   3   2   1   5 6.66523     4965
   1   1   1  23   2  -1   1   3   2   1   6 6.56906     4966
   1   1   1  23   2  -1   1   3   2   1   7 6.98505     4967
   1   1   1  23   2  -1   1   3   2   1  23 6.64833     4968
   1   1   1  23   2  -1   1   3   2   1  24 6.46598     4969
   1   1   1  23   2   0   1   2   1   1   5 6.70140     4970
   1   1   1  23   2   0   1   2   1   1   6 6.20756     4971
   1   1   1  23   2   0   1   2   1   1  23 6.19723     4972
   1   1   1  23   2   0   1   2   1   1  24 5.20368     4973
   1   1   1  23   2   0   1   2   2   1   5 6.70140     4974
   1   1   1  23   2   0   1   2   2   1   6 6.20756     4975
   1   1   1  23   2   0   1   2   2   1  23 6.19724     4976
   1   1   1  23   2   0   1   2   2   1  24 5.20368     4977
   1   1   1  23   2   0   1   3   1   1   2 4.59851     4978
   1   1   1  23   2   0   1   3   1   1   3 4.99759     4979
   1   1   1  23   2   0   1   3   1   1   4 4.38826     4980
   1   1   1  23   2   0   1   3   1   1   5 5.39140     4981
   1   1   1  23   2   0   1   3   1   1   6 6.70161     4982
   1   1   1  23   2   0   1   3   1   1   8 6.42036     4983
   1   1   1  23   2   0   1   3   1   1  14 5.93425     4984
   1   1   1  23   2   0   1   3   1   1  15 5.73801     4985
   1   1   1  23   2   0   1   3   1   1  19 5.22386     4986
   1   1   1  23   2   0   1   3   1   1  21 3.07691     4987
   1   1   1  23   2   0   1   3   1   1  22 3.35207     4988
   1   1   1  23   2   0   1   3   1   1  23 5.35963     4989
   1   1   1  23   2   0   1   3   2   1   2 4.59851     4990
   1   1   1  23   2   0   1   3   2   1   3 4.99759     4991
   1   1   1  23   2   0   1   3   2   1   4 4.38827     4992
   1   1   1  23   2   0   1   3   2   1   5 5.39141     4993
   1   1   1  23   2   0   1   3   2   1   6 6.70162     4994
   1   1   1  23   2   0   1   3   2   1   8 6.42037     4995
   1   1   1  23   2   0   1   3   2   1  14 5.93424     4996
   1   1   1  23   2   0   1   3   2   1  15 5.73800     4997
   1   1   1  23   2   0   1   3   2   1  19 5.22385     4998
   1   1   1  23   2   0   1   3   2   1  21 3.13033     4999
   1   1   1  23   2   0   1   3   2   1  22 3.35207     5000
   1   1   1  23   2   0   1   3   2   1  23 5.35965     5001
   1   1   1  23   2   0   1   3   2   1  26 2.42453     5002
   1   1   1  23   2   0   1   3   2   1  27 3.21087     5003
   1   1   1  23   2   0   1   3   2   1  28 3.17575     5004
   1   1   1  24  -1   0   0   1   1   1  23 6.59618     5005
   1   1   1  24  -1   0   0   1   2   1  23 6.59618     5006
   1   1   1  24   0  -1   0   1   2   1  26 6.55445     5007
   1   1   1  24   0  -1   0   1   2   1  28 6.68025     5008
   1   1   1  24   0   0   1   4   1   1   2 3.12539     5009
   1   1   1  24   0   0   1   4   1   1   3 3.91434     5010
   1   1   1  24   0   0   1   4   1   1   4 4.47456     5011
   1   1   1  24   0   0   1   4   1   1   5 5.59888     5012
   1   1   1  24   0   0   1   4   1   1   6 6.19017     5013
   1   1   1  24   0   0   1   4   1   1   7 5.83499     5014
   1   1   1  24   0   0   1   4   1   1   8 4.74311     5015
   1   1   1  24   0   0   1   4   1   1   9 4.89720     5016
   1   1   1  24   0   0   1   4   1   1  10 4.29288     5017
   1   1   1  24   0   0   1   4   1   1  11 5.08251     5018
   1   1   1  24   0   0   1   4   1   1  12 5.10666     5019
   1   1   1  24   0   0   1   4   1   1  13 4.37046     5020
   1   1   1  24   0   0   1   4   1   1  14 3.44378     5021
   1   1   1  24   0   0   1   4   1   1  15 3.35488     5022
   1   1   1  24   0   0   1   4   1   1  16 5.95952     5023
   1   1   1  24   0   0   1   4   1   1  17 5.99316     5024
   1   1   1  24   0   0   1   4   1   1  18 4.86582     5025
   1   1   1  24   0   0   1   4   1   1  19 3.26855     5026
   1   1   1  24   0   0   1   4   1   1  20 6.27445     5027
   1   1   1  24   0   0   1   4   1   1  21 2.97151     5028
   1   1   1  24   0   0   1   4   1   1  22 4.33687     5029
   1   1   1  24   0   0   1   4   1   1  23 6.25153     5030
   1   1   1  24   0   0   1   4   1   1  25 6.61618     5031
   1   1   1  24   0   0   1   4   1   1  26 6.57500     5032
   1   1   1  24   0   0   1   4   1   1  27 6.37246     5033
   1   1   1  24   0   0   1   4   2   1   2 3.12540     5034
   1   1   1  24   0   0   1   4   2   1   3 3.91434     5035
   1   1   1  24   0   0   1   4   2   1   4 4.47455     5036
   1   1   1  24   0   0   1   4   2   1   5 5.59888     5037
   1   1   1  24   0   0   1   4   2   1   6 6.19017     5038
   1   1   1  24   0   0   1   4   2   1   7 5.83500     5039
   1   1   1  24   0   0   1   4   2   1   8 4.74311     5040
   1   1   1  24   0   0   1   4   2   1   9 4.89721     5041
   1   1   1  24   0   0   1   4   2   1  10 4.29289     5042
   1   1   1  24   0   0   1   4   2   1  11 5.08253     5043
   1   1   1  24   0   0   1   4   2   1  12 5.10668     5044
   1   1   1  24   0   0   1   4   2   1  13 4.37047     5045
   1   1   1  24   0   0   1   4   2   1  14 3.44379     5046
   1   1   1  24   0   0   1   4   2   1  15 3.35489     5047
   1   1   1  24   0   0   1   4   2   1  16 5.95953     5048
   1   1   1  24   0   0   1   4   2   1  17 5.99317     5049
   1   1   1  24   0   0   1   4   2   1  18 4.86583     5050
   1   1   1  24   0   0   1   4   2   1  19 3.26855     5051
   1   1   1  24   0   0   1   4   2   1  20 6.35769     5052
   1   1   1  24   0   0   1   4   2   1  21 2.98694     5053
   1   1   1  24   0   0   1   4   2   1  22 4.33686     5054
   1   1   1  24   0   0   1   4   2   1  23 6.25153     5055
   1   1   1  24   0   0   1   4   2   1  25 6.61619     5056
   1   1   1  24   0   0   1   4   2   1  26 3.83710     5057
   1   1   1  24   0   0   1   4   2   1  27 2.28263     5058
   1   1   1  24   0   0   1   4   2   1  28 3.54708     5059
   1   1   1  24   1  -1   0   2   1   1  11 6.73145     5060
   1   1   1  24   1  -1   0   2   1   1  12 5.54603     5061
   1   1   1  24   1  -1   0   2   1   1  13 4.73664     5062
   1   1   1  24   1  -1   0   2   1   1  14 5.35228     5063
   1   1   1  24   1  -1   0   2   1   1  15 6.61792     5064
   1   1   1  24   1  -1   0   2   1   1  17 5.45234     5065
   1   1   1  24   1  -1   0   2   1   1  18 3.89009     5066
   1   1   1  24   1  -1   0   2   1   1  19 5.11813     5067
   1   1   1  24   1  -1   0   2   2   1  11 6.73145     5068
   1   1   1  24   1  -1   0   2   2   1  12 5.54604     5069
   1   1   1  24   1  -1   0   2   2   1  13 4.73664     5070
   1   1   1  24   1  -1   0   2   2   1  14 5.35229     5071
   1   1   1  24   1  -1   0   2   2   1  15 6.61793     5072
   1   1   1  24   1  -1   0   2   2   1  17 5.45235     5073
   1   1   1  24   1  -1   0   2   2   1  18 3.89009     5074
   1   1   1  24   1  -1   0   2   2   1  19 5.11814     5075
   1   1   1  24   1  -1   0   2   2   1  27 6.97202     5076
   1   1   1  24   1  -1   1   2   1   1   3 6.79203     5077
   1   1   1  24   1  -1   1   2   1   1   4 6.97409     5078
   1   1   1  24   1  -1   1   2   1   1   5 6.81840     5079
   1   1   1  24   1  -1   1   2   1   1   6 6.47379     5080
   1   1   1  24   1  -1   1   2   1   1   7 6.28019     5081
   1   1   1  24   1  -1   1   2   1   1   8 6.43814     5082
   1   1   1  24   1  -1   1   2   1   1   9 6.69486     5083
   1   1   1  24   1  -1   1   2   1   1  20 6.86166     5084
   1   1   1  24   1  -1   1   2   1   1  24 6.67214     5085
   1   1   1  24   1  -1   1   2   1   1  25 6.33474     5086
   1   1   1  24   1  -1   1   2   1   1  28 6.00336     5087
   1   1   1  24   1  -1   1   2   2   1   3 6.79202     5088
   1   1   1  24   1  -1   1   2   2   1   4 6.97408     5089
   1   1   1  24   1  -1   1   2   2   1   5 6.81839     5090
   1   1   1  24   1  -1   1   2   2   1   6 6.47378     5091
   1   1   1  24   1  -1   1   2   2   1   7 6.28018     5092
   1   1   1  24   1  -1   1   2   2   1   8 6.43813     5093
   1   1   1  24   1  -1   1   2   2   1   9 6.69486     5094
   1   1   1  24   1  -1   1   2   2   1  20 6.84817     5095
   1   1   1  24   1  -1   1   2   2   1  24 6.67213     5096
   1   1   1  24   1  -1   1   2   2   1  25 6.33473     5097
   1   1   1  24   1  -1   1   3   1   1   2 6.42246     5098
   1   1   1  24   1  -1   1   3   1   1   3 5.89772     5099
   1   1   1  24   1  -1   1   3   1   1   4 6.72482     5100
   1   1   1  24   1  -1   1   3   1   1   5 6.67250     5101
   1   1   1  24   1  -1   1   3   1   1   6 5.76632     5102
   1   1   1  24   1  -1   1   3   1   1   7 4.78783     5103
   1   1   1  24   1  -1   1   3   1   1   8 4.82856     5104
   1   1   1  24   1  -1   1   3   1   1   9 4.33329     5105
   1   1   1  24   1  -1   1   3   1   1  10 5.04944     5106
   1   1   1  24   1  -1   1   3   1   1  11 5.23279     5107
   1   1   1  24   1  -1   1   3   1   1  12 6.30696     5108
   1   1   1  24   1  -1   1   3   1   1  15 6.08432     5109
   1   1   1  24   1  -1   1   3   1   1  16 4.80237     5110
   1   1   1  24   1  -1   1   3   1   1  17 6.71799     5111
   1   1   1  24   1  -1   1   3   1   1  20 3.58666     5112
   1   1   1  24   1  -1   1   3   1   1  24 6.07535     5113
   1   1   1  24   1  -1   1   3   1   1  25 4.30214     5114
   1   1   1  24   1  -1   1   3   1   1  26 3.73314     5115
   1   1   1  24   1  -1   1   3   1   1  27 2.65609     5116
   1   1   1  24   1  -1   1   3   1   1  28 4.29814     5117
   1   1   1  24   1  -1   1   3   2   1   2 6.42246     5118
   1   1   1  24   1  -1   1   3   2   1   3 5.89772     5119
   1   1   1  24   1  -1   1   3   2   1   4 6.72483     5120
   1   1   1  24   1  -1   1   3   2   1   5 6.67251     5121
   1   1   1  24   1  -1   1   3   2   1   6 5.76632     5122
   1   1   1  24   1  -1   1   3   2   1   7 4.78782     5123
   1   1   1  24   1  -1   1   3   2   1   8 4.82856     5124
   1   1   1  24   1  -1   1   3   2   1   9 4.33329     5125
   1   1   1  24   1  -1   1   3   2   1  10 5.04944     5126
   1   1   1  24   1  -1   1   3   2   1  11 5.23279     5127
   1   1   1  24   1  -1   1   3   2   1  12 6.30696     5128
   1   1   1  24   1  -1   1   3   2   1  15 6.08433     5129
   1   1   1  24   1  -1   1   3   2   1  16 4.80236     5130
   1   1   1  24   1  -1   1   3   2   1  17 6.71799     5131
   1   1   1  24   1  -1   1   3   2   1  20 3.59182     5132
   1   1   1  24   1  -1   1   3   2   1  24 6.07535     5133
   1   1   1  24   1  -1   1   3   2   1  25 4.30214     5134
   1   1   1  24   1   0   0   1   1   1   9 6.54071     5135
   1   1   1  24   1   0   0   1   1   1  11 6.97158     5136
   1   1   1  24   1   0   0   1   1   1  16 6.10145     5137
   1   1   1  24   1   0   0   1   1   1  20 5.14387     5138
   1   1   1  24   1   0   0   1   1   1  25 6.20696     5139
   1   1   1  24   1   0   0   1   1   1  26 4.89646     5140
   1   1   1  24   1   0   0   1   1   1  27 5.44352     5141
   1   1   1  24   1   0   0   1   1   1  28 4.50629     5142
   1   1   1  24   1   0   0   1   2   1   9 6.54071     5143
   1   1   1  24   1   0   0   1   2   1  11 6.97158     5144
   1   1   1  24   1   0   0   1   2   1  16 6.10145     5145
   1   1   1  24   1   0   0   1   2   1  20 5.06450     5146
   1   1   1  24   1   0   0   1   2   1  25 6.20696     5147
   1   1   1  24   1   0   1   2   1   1  24 6.67214     5148
   1   1   1  24   1   0   1   2   1   1  25 6.29154     5149
   1   1   1  24   1   0   1   2   1   1  27 6.90153     5150
   1   1   1  24   1   0   1   2   2   1  24 6.67214     5151
   1   1   1  24   1   0   1   2   2   1  25 6.29154     5152
   1   1   1  24   1   0   1   3   1   1   2 4.70533     5153
   1   1   1  24   1   0   1   3   1   1   3 5.71954     5154
   1   1   1  24   1   0   1   3   1   1   4 6.60319     5155
   1   1   1  24   1   0   1   3   1   1   8 6.21872     5156
   1   1   1  24   1   0   1   3   1   1   9 5.83760     5157
   1   1   1  24   1   0   1   3   1   1  10 4.84606     5158
   1   1   1  24   1   0   1   3   1   1  11 4.95272     5159
   1   1   1  24   1   0   1   3   1   1  12 4.47055     5160
   1   1   1  24   1   0   1   3   1   1  13 3.74975     5161
   1   1   1  24   1   0   1   3   1   1  14 3.57238     5162
   1   1   1  24   1   0   1   3   1   1  15 4.16934     5163
   1   1   1  24   1   0   1   3   1   1  16 5.76396     5164
   1   1   1  24   1   0   1   3   1   1  17 5.01634     5165
   1   1   1  24   1   0   1   3   1   1  18 3.82790     5166
   1   1   1  24   1   0   1   3   1   1  19 3.51876     5167
   1   1   1  24   1   0   1   3   1   1  20 6.95323     5168
   1   1   1  24   1   0   1   3   1   1  21 4.76108     5169
   1   1   1  24   1   0   1   3   1   1  22 6.59414     5170
   1   1   1  24   1   0   1   3   1   1  26 6.90793     5171
   1   1   1  24   1   0   1   3   2   1   2 4.70533     5172
   1   1   1  24   1   0   1   3   2   1   3 5.71955     5173
   1   1   1  24   1   0   1   3   2   1   4 6.60319     5174
   1   1   1  24   1   0   1   3   2   1   8 6.21873     5175
   1   1   1  24   1   0   1   3   2   1   9 5.83761     5176
   1   1   1  24   1   0   1   3   2   1  10 4.84606     5177
   1   1   1  24   1   0   1   3   2   1  11 4.95272     5178
   1   1   1  24   1   0   1   3   2   1  12 4.47055     5179
   1   1   1  24   1   0   1   3   2   1  13 3.74974     5180
   1   1   1  24   1   0   1   3   2   1  14 3.57237     5181
   1   1   1  24   1   0   1   3   2   1  15 4.16934     5182
   1   1   1  24   1   0   1   3   2   1  16 5.76397     5183
   1   1   1  24   1   0   1   3   2   1  17 5.01633     5184
   1   1   1  24   1   0   1   3   2   1  18 3.82788     5185
   1   1   1  24   1   0   1   3   2   1  19 3.51874     5186
   1   1   1  24   1   0   1   3   2   1  21 4.73393     5187
   1   1   1  24   1   0   1   3   2   1  22 6.59414     5188
   1   1   1  24   1   0   1   3   2   1  26 5.04905     5189
   1   1   1  24   1   0   1   3   2   1  27 5.31360     5190
   1   1   1  24   1   0   1   3   2   1  28 3.99223     5191
   1   1   1  24   1   0   1   4   1   1   9 5.94693     5192
   1   1   1  24   1   0   1   4   1   1  10 5.16902     5193
   1   1   1  24   1   0   1   4   1   1  11 3.73858     5194
   1   1   1  24   1   0   1   4   1   1  12 3.41791     5195
   1   1   1  24   1   0   1   4   1   1  13 4.64836     5196
   1   1   1  24   1   0   1   4   1   1  14 5.80807     5197
   1   1   1  24   1   0   1   4   1   1  15 6.05425     5198
   1   1   1  24   1   0   1   4   1   1  16 3.21774     5199
   1   1   1  24   1   0   1   4   1   1  17 2.50250     5200
   1   1   1  24   1   0   1   4   1   1  18 4.87370     5201
   1   1   1  24   1   0   1   4   1   1  19 6.74140     5202
   1   1   1  24   1   0   1   4   1   1  20 5.57253     5203
   1   1   1  24   1   0   1   4   1   1  26 4.60842     5204
   1   1   1  24   1   0   1   4   1   1  27 6.13811     5205
   1   1   1  24   1   0   1   4   1   1  28 6.17193     5206
   1   1   1  24   1   0   1   4   2   1   9 5.94693     5207
   1   1   1  24   1   0   1   4   2   1  10 5.16901     5208
   1   1   1  24   1   0   1   4   2   1  11 3.73857     5209
   1   1   1  24   1   0   1   4   2   1  12 3.41790     5210
   1   1   1  24   1   0   1   4   2   1  13 4.64835     5211
   1   1   1  24   1   0   1   4   2   1  14 5.80807     5212
   1   1   1  24   1   0   1   4   2   1  15 6.05424     5213
   1   1   1  24   1   0   1   4   2   1  16 3.21773     5214
   1   1   1  24   1   0   1   4   2   1  17 2.50250     5215
   1   1   1  24   1   0   1   4   2   1  18 4.87370     5216
   1   1   1  24   1   0   1   4   2   1  19 6.74139     5217
   1   1   1  24   1   0   1   4   2   1  20 5.57933     5218
   1   1   1  24   2  -1   1   2   1   1   4 6.41771     5219
   1   1   1  24   2  -1   1   2   1   1   5 6.02660     5220
   1   1   1  24   2  -1   1   2   1   1   6 6.97588     5221
   1   1   1  24   2  -1   1   2   1   1  22 5.98552     5222
   1   1   1  24   2  -1   1   2   1   1  23 5.20368     5223
   1   1   1  24   2  -1   1   2   1   1  24 6.99366     5224
   1   1   1  24   2  -1   1   2   2   1   4 6.41770     5225
   1   1   1  24   2  -1   1   2   2   1   5 6.02659     5226
   1   1   1  24   2  -1   1   2   2   1   6 6.97587     5227
   1   1   1  24   2  -1   1   2   2   1  22 5.98552     5228
   1   1   1  24   2  -1   1   2   2   1  23 5.20367     5229
   1   1   1  24   2  -1   1   2   2   1  24 6.99365     5230
   1   1   1  24   2  -1   1   2   2   1  26 6.90256     5231
   1   1   1  24   2  -1   1   3   1   1   4 6.93633     5232
   1   1   1  24   2  -1   1   3   1   1   5 6.68521     5233
   1   1   1  24   2  -1   1   3   1   1  22 6.90539     5234
   1   1   1  24   2  -1   1   3   1   1  23 6.46597     5235
   1   1   1  24   2  -1   1   3   2   1   4 6.93634     5236
   1   1   1  24   2  -1   1   3   2   1   5 6.68522     5237
   1   1   1  24   2  -1   1   3   2   1  22 6.90540     5238
   1   1   1  24   2  -1   1   3   2   1  23 6.46599     5239
   1   1   1  24   2   0   1   2   1   1  24 6.99366     5240
   1   1   1  24   2   0   1   2   2   1  24 6.99366     5241
   1   1   1  24   2   0   1   3   1   1   2 6.95801     5242
   1   1   1  24   2   0   1   3   1   1   4 6.81847     5243
   1   1   1  24   2   0   1   3   1   1  21 5.31685     5244
   1   1   1  24   2   0   1   3   1   1  22 5.75579     5245
   1   1   1  24   2   0   1   3   2   1   2 6.95801     5246
   1   1   1  24   2   0   1   3   2   1   4 6.81848     5247
   1   1   1  24   2   0   1   3   2   1  21 5.38376     5248
   1   1   1  24   2   0   1   3   2   1  22 5.75579     5249
   1   1   1  24   2   0   1   3   2   1  26 4.82993     5250
   1   1   1  24   2   0   1   3   2   1  27 5.29466     5251
   1   1   1  24   2   0   1   3   2   1  28 5.23527     5252
   1   1   1  25  -1   0   0   1   1   1   4 5.97883     5253
   1   1   1  25  -1   0   0   1   1   1   5 5.42957     5254
   1   1   1  25  -1   0   0   1   1   1   6 6.28222     5255
   1   1   1  25  -1   0   0   1   1   1  22 5.65904     5256
   1   1   1  25  -1   0   0   1   1   1  23 4.58058     5257
   1   1   1  25  -1   0   0   1   1   1  24 6.20696     5258
   1   1   1  25  -1   0   0   1   2   1   4 5.97883     5259
   1   1   1  25  -1   0   0   1   2   1   5 5.42957     5260
   1   1   1  25  -1   0   0   1   2   1   6 6.28222     5261
   1   1   1  25  -1   0   0   1   2   1  22 5.65904     5262
   1   1   1  25  -1   0   0   1   2   1  23 4.58058     5263
   1   1   1  25  -1   0   0   1   2   1  24 6.20696     5264
   1   1   1  25  -1   0   1   4   2   1  27 6.62628     5265
   1   1   1  25   0  -1   0   1   2   1  26 6.63303     5266
   1   1   1  25   0  -1   0   1   2   1  28 6.30481     5267
   1   1   1  25   0  -1   0   2   1   1  12 5.96342     5268
   1   1   1  25   0  -1   0   2   1   1  13 6.38339     5269
   1   1   1  25   0  -1   0   2   1   1  17 4.95138     5270
   1   1   1  25   0  -1   0   2   1   1  18 5.80229     5271
   1   1   1  25   0  -1   0   2   2   1  12 5.96342     5272
   1   1   1  25   0  -1   0   2   2   1  13 6.38339     5273
   1   1   1  25   0  -1   0   2   2   1  17 4.95138     5274
   1   1   1  25   0  -1   0   2   2   1  18 5.80229     5275
   1   1   1  25   0  -1   1   3   1   1  16 6.36216     5276
   1   1   1  25   0  -1   1   3   1   1  20 6.17110     5277
   1   1   1  25   0  -1   1   3   1   1  26 5.51450     5278
   1   1   1  25   0  -1   1   3   1   1  27 6.03720     5279
   1   1   1  25   0  -1   1   3   1   1  28 6.24737     5280
   1   1   1  25   0  -1   1   3   2   1  16 6.36216     5281
   1   1   1  25   0  -1   1   3   2   1  20 6.10573     5282
   1   1   1  25   0   0   0   4   1   1  24 6.61615     5283
   1   1   1  25   0   0   0   4   2   1  24 6.61614     5284
   1   1   1  25   0   0   1   3   1   1  17 6.64782     5285
   1   1   1  25   0   0   1   3   2   1  17 6.64783     5286
   1   1   1  25   0   0   1   4   1   1   2 4.04484     5287
   1   1   1  25   0   0   1   4   1   1   3 5.04532     5288
   1   1   1  25   0   0   1   4   1   1   4 6.08639     5289
   1   1   1  25   0   0   1   4   1   1   7 6.66201     5290
   1   1   1  25   0   0   1   4   1   1   8 5.39902     5291
   1   1   1  25   0   0   1   4   1   1   9 4.88059     5292
   1   1   1  25   0   0   1   4   1   1  10 3.84828     5293
   1   1   1  25   0   0   1   4   1   1  11 3.90334     5294
   1   1   1  25   0   0   1   4   1   1  12 3.50269     5295
   1   1   1  25   0   0   1   4   1   1  13 2.94720     5296
   1   1   1  25   0   0   1   4   1   1  14 2.83263     5297
   1   1   1  25   0   0   1   4   1   1  15 3.31816     5298
   1   1   1  25   0   0   1   4   1   1  16 4.71113     5299
   1   1   1  25   0   0   1   4   1   1  17 4.10670     5300
   1   1   1  25   0   0   1   4   1   1  18 3.25727     5301
   1   1   1  25   0   0   1   4   1   1  19 3.06321     5302
   1   1   1  25   0   0   1   4   1   1  20 5.93560     5303
   1   1   1  25   0   0   1   4   1   1  21 4.41915     5304
   1   1   1  25   0   0   1   4   1   1  22 6.20415     5305
   1   1   1  25   0   0   1   4   1   1  26 5.84391     5306
   1   1   1  25   0   0   1   4   1   1  27 6.14731     5307
   1   1   1  25   0   0   1   4   1   1  28 6.84942     5308
   1   1   1  25   0   0   1   4   2   1   2 4.04484     5309
   1   1   1  25   0   0   1   4   2   1   3 5.04532     5310
   1   1   1  25   0   0   1   4   2   1   4 6.08639     5311
   1   1   1  25   0   0   1   4   2   1   7 6.66201     5312
   1   1   1  25   0   0   1   4   2   1   8 5.39903     5313
   1   1   1  25   0   0   1   4   2   1   9 4.88060     5314
   1   1   1  25   0   0   1   4   2   1  10 3.84829     5315
   1   1   1  25   0   0   1   4   2   1  11 3.90335     5316
   1   1   1  25   0   0   1   4   2   1  12 3.50271     5317
   1   1   1  25   0   0   1   4   2   1  13 2.94721     5318
   1   1   1  25   0   0   1   4   2   1  14 2.83264     5319
   1   1   1  25   0   0   1   4   2   1  15 3.31816     5320
   1   1   1  25   0   0   1   4   2   1  16 4.71114     5321
   1   1   1  25   0   0   1   4   2   1  17 4.10672     5322
   1   1   1  25   0   0   1   4   2   1  18 3.25728     5323
   1   1   1  25   0   0   1   4   2   1  19 3.06321     5324
   1   1   1  25   0   0   1   4   2   1  20 6.01255     5325
   1   1   1  25   0   0   1   4   2   1  21 4.41467     5326
   1   1   1  25   0   0   1   4   2   1  22 6.20414     5327
   1   1   1  25   0   0   1   4   2   1  26 5.43328     5328
   1   1   1  25   0   0   1   4   2   1  27 3.98289     5329
   1   1   1  25   0   0   1   4   2   1  28 4.62635     5330
   1   1   1  25   1  -1   0   2   1   1   2 6.11937     5331
   1   1   1  25   1  -1   0   2   1   1  10 6.61213     5332
   1   1   1  25   1  -1   0   2   1   1  11 6.58744     5333
   1   1   1  25   1  -1   0   2   1   1  12 5.66161     5334
   1   1   1  25   1  -1   0   2   1   1  13 4.50964     5335
   1   1   1  25   1  -1   0   2   1   1  14 4.46865     5336
   1   1   1  25   1  -1   0   2   1   1  15 5.61499     5337
   1   1   1  25   1  -1   0   2   1   1  17 6.02222     5338
   1   1   1  25   1  -1   0   2   1   1  18 3.96047     5339
   1   1   1  25   1  -1   0   2   1   1  19 3.87061     5340
   1   1   1  25   1  -1   0   2   1   1  21 5.53509     5341
   1   1   1  25   1  -1   0   2   2   1   2 6.11937     5342
   1   1   1  25   1  -1   0   2   2   1  10 6.61214     5343
   1   1   1  25   1  -1   0   2   2   1  11 6.58744     5344
   1   1   1  25   1  -1   0   2   2   1  12 5.66161     5345
   1   1   1  25   1  -1   0   2   2   1  13 4.50964     5346
   1   1   1  25   1  -1   0   2   2   1  14 4.46866     5347
   1   1   1  25   1  -1   0   2   2   1  15 5.61499     5348
   1   1   1  25   1  -1   0   2   2   1  17 6.02222     5349
   1   1   1  25   1  -1   0   2   2   1  18 3.96047     5350
   1   1   1  25   1  -1   0   2   2   1  19 3.87061     5351
   1   1   1  25   1  -1   0   2   2   1  21 5.57588     5352
   1   1   1  25   1  -1   0   2   2   1  26 6.47091     5353
   1   1   1  25   1  -1   0   2   2   1  27 5.04403     5354
   1   1   1  25   1  -1   0   2   2   1  28 5.32008     5355
   1   1   1  25   1  -1   1   2   1   1   4 6.80362     5356
   1   1   1  25   1  -1   1   2   1   1   5 6.38970     5357
   1   1   1  25   1  -1   1   2   1   1   6 6.29560     5358
   1   1   1  25   1  -1   1   2   1   1   7 6.61661     5359
   1   1   1  25   1  -1   1   2   1   1  23 6.44812     5360
   1   1   1  25   1  -1   1   2   1   1  24 6.29154     5361
   1   1   1  25   1  -1   1   2   1   1  25 6.85325     5362
   1   1   1  25   1  -1   1   2   2   1   4 6.80361     5363
   1   1   1  25   1  -1   1   2   2   1   5 6.38969     5364
   1   1   1  25   1  -1   1   2   2   1   6 6.29559     5365
   1   1   1  25   1  -1   1   2   2   1   7 6.61660     5366
   1   1   1  25   1  -1   1   2   2   1  23 6.44810     5367
   1   1   1  25   1  -1   1   2   2   1  24 6.29153     5368
   1   1   1  25   1  -1   1   2   2   1  25 6.85324     5369
   1   1   1  25   1  -1   1   3   1   1   2 5.95837     5370
   1   1   1  25   1  -1   1   3   1   1   3 5.05884     5371
   1   1   1  25   1  -1   1   3   1   1   4 5.39863     5372
   1   1   1  25   1  -1   1   3   1   1   5 5.02230     5373
   1   1   1  25   1  -1   1   3   1   1   6 4.17543     5374
   1   1   1  25   1  -1   1   3   1   1   7 3.70441     5375
   1   1   1  25   1  -1   1   3   1   1   8 4.20737     5376
   1   1   1  25   1  -1   1   3   1   1   9 4.46977     5377
   1   1   1  25   1  -1   1   3   1   1  10 5.48258     5378
   1   1   1  25   1  -1   1   3   1   1  11 6.23824     5379
   1   1   1  25   1  -1   1   3   1   1  15 6.17317     5380
   1   1   1  25   1  -1   1   3   1   1  16 6.11508     5381
   1   1   1  25   1  -1   1   3   1   1  20 4.26065     5382
   1   1   1  25   1  -1   1   3   1   1  22 6.26317     5383
   1   1   1  25   1  -1   1   3   1   1  23 5.68605     5384
   1   1   1  25   1  -1   1   3   1   1  24 4.30214     5385
   1   1   1  25   1  -1   1   3   1   1  25 3.44704     5386
   1   1   1  25   1  -1   1   3   1   1  26 4.91507     5387
   1   1   1  25   1  -1   1   3   1   1  27 3.33688     5388
   1   1   1  25   1  -1   1   3   1   1  28 4.69779     5389
   1   1   1  25   1  -1   1   3   2   1   2 5.95838     5390
   1   1   1  25   1  -1   1   3   2   1   3 5.05884     5391
   1   1   1  25   1  -1   1   3   2   1   4 5.39864     5392
   1   1   1  25   1  -1   1   3   2   1   5 5.02231     5393
   1   1   1  25   1  -1   1   3   2   1   6 4.17543     5394
   1   1   1  25   1  -1   1   3   2   1   7 3.70440     5395
   1   1   1  25   1  -1   1   3   2   1   8 4.20737     5396
   1   1   1  25   1  -1   1   3   2   1   9 4.46977     5397
   1   1   1  25   1  -1   1   3   2   1  10 5.48258     5398
   1   1   1  25   1  -1   1   3   2   1  11 6.23824     5399
   1   1   1  25   1  -1   1   3   2   1  15 6.17317     5400
   1   1   1  25   1  -1   1   3   2   1  16 6.11507     5401
   1   1   1  25   1  -1   1   3   2   1  20 4.28089     5402
   1   1   1  25   1  -1   1   3   2   1  22 6.26318     5403
   1   1   1  25   1  -1   1   3   2   1  23 5.68606     5404
   1   1   1  25   1  -1   1   3   2   1  24 4.30215     5405
   1   1   1  25   1  -1   1   3   2   1  25 3.44704     5406
   1   1   1  25   1   0   0   1   1   1  16 6.70331     5407
   1   1   1  25   1   0   0   1   1   1  20 6.57331     5408
   1   1   1  25   1   0   0   1   1   1  26 5.98262     5409
   1   1   1  25   1   0   0   1   1   1  27 6.89855     5410
   1   1   1  25   1   0   0   1   1   1  28 6.22491     5411
   1   1   1  25   1   0   0   1   2   1  16 6.70331     5412
   1   1   1  25   1   0   0   1   2   1  20 6.50095     5413
   1   1   1  25   1   0   1   2   1   1  24 6.33474     5414
   1   1   1  25   1   0   1   2   1   1  25 6.85325     5415
   1   1   1  25   1   0   1   2   2   1  24 6.33474     5416
   1   1   1  25   1   0   1   2   2   1  25 6.85325     5417
   1   1   1  25   1   0   1   3   1   1   2 4.11581     5418
   1   1   1  25   1   0   1   3   1   1   3 4.90587     5419
   1   1   1  25   1   0   1   3   1   1   4 5.29808     5420
   1   1   1  25   1   0   1   3   1   1   5 6.38706     5421
   1   1   1  25   1   0   1   3   1   1   7 6.83253     5422
   1   1   1  25   1   0   1   3   1   1   8 5.79698     5423
   1   1   1  25   1   0   1   3   1   1   9 5.98536     5424
   1   1   1  25   1   0   1   3   1   1  10 5.34712     5425
   1   1   1  25   1   0   1   3   1   1  11 6.05049     5426
   1   1   1  25   1   0   1   3   1   1  12 5.93158     5427
   1   1   1  25   1   0   1   3   1   1  13 5.07624     5428
   1   1   1  25   1   0   1   3   1   1  14 4.22968     5429
   1   1   1  25   1   0   1   3   1   1  15 4.36096     5430
   1   1   1  25   1   0   1   3   1   1  16 6.93543     5431
   1   1   1  25   1   0   1   3   1   1  17 6.75309     5432
   1   1   1  25   1   0   1   3   1   1  18 5.37931     5433
   1   1   1  25   1   0   1   3   1   1  19 3.86004     5434
   1   1   1  25   1   0   1   3   1   1  21 3.63936     5435
   1   1   1  25   1   0   1   3   1   1  22 5.02171     5436
   1   1   1  25   1   0   1   3   1   1  23 6.91271     5437
   1   1   1  25   1   0   1   3   2   1   2 4.11580     5438
   1   1   1  25   1   0   1   3   2   1   3 4.90587     5439
   1   1   1  25   1   0   1   3   2   1   4 5.29808     5440
   1   1   1  25   1   0   1   3   2   1   5 6.38706     5441
   1   1   1  25   1   0   1   3   2   1   7 6.83253     5442
   1   1   1  25   1   0   1   3   2   1   8 5.79698     5443
   1   1   1  25   1   0   1   3   2   1   9 5.98536     5444
   1   1   1  25   1   0   1   3   2   1  10 5.34712     5445
   1   1   1  25   1   0   1   3   2   1  11 6.05049     5446
   1   1   1  25   1   0   1   3   2   1  12 5.93157     5447
   1   1   1  25   1   0   1   3   2   1  13 5.07623     5448
   1   1   1  25   1   0   1   3   2   1  14 4.22966     5449
   1   1   1  25   1   0   1   3   2   1  15 4.36095     5450
   1   1   1  25   1   0   1   3   2   1  16 6.93543     5451
   1   1   1  25   1   0   1   3   2   1  17 6.75308     5452
   1   1   1  25   1   0   1   3   2   1  18 5.37929     5453
   1   1   1  25   1   0   1   3   2   1  19 3.86002     5454
   1   1   1  25   1   0   1   3   2   1  21 3.62246     5455
   1   1   1  25   1   0   1   3   2   1  22 5.02170     5456
   1   1   1  25   1   0   1   3   2   1  23 6.91271     5457
   1   1   1  25   1   0   1   3   2   1  26 3.45582     5458
   1   1   1  25   1   0   1   3   2   1  27 4.34694     5459
   1   1   1  25   1   0   1   3   2   1  28 2.88082     5460
   1   1   1  25   1   0   1   4   1   1  11 6.15898     5461
   1   1   1  25   1   0   1   4   1   1  12 5.69429     5462
   1   1   1  25   1   0   1   4   1   1  13 6.76345     5463
   1   1   1  25   1   0   1   4   1   1  16 5.62003     5464
   1   1   1  25   1   0   1   4   1   1  17 4.66493     5465
   1   1   1  25   1   0   1   4   1   1  18 6.72596     5466
   1   1   1  25   1   0   1   4   1   1  26 6.83448     5467
   1   1   1  25   1   0   1   4   2   1  11 6.15897     5468
   1   1   1  25   1   0   1   4   2   1  12 5.69428     5469
   1   1   1  25   1   0   1   4   2   1  13 6.76344     5470
   1   1   1  25   1   0   1   4   2   1  16 5.62002     5471
   1   1   1  25   1   0   1   4   2   1  17 4.66492     5472
   1   1   1  25   1   0   1   4   2   1  18 6.72596     5473
   1   1   1  25   2   0   1   3   2   1  26 6.65807     5474
   1   1   1  26  -1  -1   0   1   1   1  21 6.86179     5475
   1   1   1  26  -1  -1   0   1   2   1  21 6.90899     5476
   1   1   1  26  -1  -1   0   1   2   1  26 6.34858     5477
   1   1   1  26  -1  -1   0   1   2   1  28 6.31292     5478
   1   1   1  26  -1   0   0   1   1   1   2 4.92766     5479
   1   1   1  26  -1   0   0   1   1   1   3 4.31372     5480
   1   1   1  26  -1   0   0   1   1   1   4 3.42772     5481
   1   1   1  26  -1   0   0   1   1   1   5 3.50548     5482
   1   1   1  26  -1   0   0   1   1   1   6 4.41533     5483
   1   1   1  26  -1   0   0   1   1   1   7 5.11179     5484
   1   1   1  26  -1   0   0   1   1   1   8 5.10509     5485
   1   1   1  26  -1   0   0   1   1   1   9 6.23372     5486
   1   1   1  26  -1   0   0   1   1   1  10 6.66759     5487
   1   1   1  26  -1   0   0   1   1   1  15 6.10181     5488
   1   1   1  26  -1   0   0   1   1   1  19 6.92933     5489
   1   1   1  26  -1   0   0   1   1   1  21 4.80928     5490
   1   1   1  26  -1   0   0   1   1   1  22 3.20120     5491
   1   1   1  26  -1   0   0   1   1   1  23 3.36414     5492
   1   1   1  26  -1   0   0   1   1   1  24 4.89646     5493
   1   1   1  26  -1   0   0   1   1   1  25 5.98262     5494
   1   1   1  26  -1   0   0   1   2   1   2 4.92766     5495
   1   1   1  26  -1   0   0   1   2   1   3 4.31372     5496
   1   1   1  26  -1   0   0   1   2   1   4 3.42772     5497
   1   1   1  26  -1   0   0   1   2   1   5 3.50549     5498
   1   1   1  26  -1   0   0   1   2   1   6 4.41534     5499
   1   1   1  26  -1   0   0   1   2   1   7 5.11179     5500
   1   1   1  26  -1   0   0   1   2   1   8 5.10509     5501
   1   1   1  26  -1   0   0   1   2   1   9 6.23372     5502
   1   1   1  26  -1   0   0   1   2   1  10 6.66759     5503
   1   1   1  26  -1   0   0   1   2   1  15 6.10181     5504
   1   1   1  26  -1   0   0   1   2   1  19 6.92933     5505
   1   1   1  26  -1   0   0   1   2   1  21 4.80781     5506
   1   1   1  26  -1   0   0   1   2   1  22 3.20120     5507
   1   1   1  26  -1   0   0   1   2   1  23 3.36414     5508
   1   1   1  26  -1   0   0   1   2   1  24 4.89646     5509
   1   1   1  26  -1   0   0   1   2   1  25 5.98262     5510
   1   1   1  26  -1   0   0   1   2   1  26 4.64184     5511
   1   1   1  26  -1   0   0   1   2   1  27 4.53906     5512
   1   1   1  26  -1   0   0   1   2   1  28 5.71173     5513
   1   1   1  26  -1   0   0   4   1   1   4 5.95891     5514
   1   1   1  26  -1   0   0   4   1   1   5 4.86944     5515
   1   1   1  26  -1   0   0   4   1   1   6 5.13923     5516
   1   1   1  26  -1   0   0   4   1   1   7 6.38174     5517
   1   1   1  26  -1   0   0   4   1   1  22 6.12668     5518
   1   1   1  26  -1   0   0   4   1   1  23 4.05688     5519
   1   1   1  26  -1   0   0   4   1   1  24 4.60842     5520
   1   1   1  26  -1   0   0   4   1   1  25 6.83449     5521
   1   1   1  26  -1   0   0   4   2   1   4 5.95891     5522
   1   1   1  26  -1   0   0   4   2   1   5 4.86944     5523
   1   1   1  26  -1   0   0   4   2   1   6 5.13924     5524
   1   1   1  26  -1   0   0   4   2   1   7 6.38174     5525
   1   1   1  26  -1   0   0   4   2   1  22 6.12668     5526
   1   1   1  26  -1   0   0   4   2   1  23 4.05688     5527
   1   1   1  26  -1   0   0   4   2   1  24 4.60843     5528
   1   1   1  26  -1   0   0   4   2   1  25 6.83450     5529
   1   1   1  26  -1   0   1   4   2   1  27 6.31650     5530
   1   1   1  26   0  -1   0   1   1   1  18 6.98856     5531
   1   1   1  26   0  -1   0   1   2   1  18 6.98856     5532
   1   1   1  26   0  -1   0   2   1   1   2 6.75976     5533
   1   1   1  26   0  -1   0   2   1   1   9 6.73575     5534
   1   1   1  26   0  -1   0   2   1   1  10 5.44175     5535
   1   1   1  26   0  -1   0   2   1   1  11 4.37501     5536
   1   1   1  26   0  -1   0   2   1   1  12 3.13502     5537
   1   1   1  26   0  -1   0   2   1   1  13 3.17803     5538
   1   1   1  26   0  -1   0   2   1   1  14 4.43559     5539
   1   1   1  26   0  -1   0   2   1   1  15 5.44583     5540
   1   1   1  26   0  -1   0   2   1   1  16 4.78603     5541
   1   1   1  26   0  -1   0   2   1   1  17 2.51193     5542
   1   1   1  26   0  -1   0   2   1   1  18 2.60279     5543
   1   1   1  26   0  -1   0   2   1   1  19 4.89028     5544
   1   1   1  26   0  -1   0   2   1   1  26 6.59828     5545
   1   1   1  26   0  -1   0   2   2   1   2 6.75976     5546
   1   1   1  26   0  -1   0   2   2   1   9 6.73575     5547
   1   1   1  26   0  -1   0   2   2   1  10 5.44175     5548
   1   1   1  26   0  -1   0   2   2   1  11 4.37502     5549
   1   1   1  26   0  -1   0   2   2   1  12 3.13502     5550
   1   1   1  26   0  -1   0   2   2   1  13 3.17802     5551
   1   1   1  26   0  -1   0   2   2   1  14 4.43559     5552
   1   1   1  26   0  -1   0   2   2   1  15 5.44583     5553
   1   1   1  26   0  -1   0   2   2   1  16 4.78603     5554
   1   1   1  26   0  -1   0   2   2   1  17 2.51194     5555
   1   1   1  26   0  -1   0   2   2   1  18 2.60278     5556
   1   1   1  26   0  -1   0   2   2   1  19 4.89028     5557
   1   1   1  26   0  -1   0   2   2   1  28 6.85252     5558
   1   1   1  26   0  -1   1   3   1   1   7 6.56344     5559
   1   1   1  26   0  -1   1   3   1   1   9 6.54071     5560
   1   1   1  26   0  -1   1   3   1   1  16 6.56795     5561
   1   1   1  26   0  -1   1   3   1   1  20 4.95364     5562
   1   1   1  26   0  -1   1   3   1   1  25 5.51450     5563
   1   1   1  26   0  -1   1   3   1   1  26 4.91723     5564
   1   1   1  26   0  -1   1   3   1   1  27 4.48880     5565
   1   1   1  26   0  -1   1   3   1   1  28 4.69305     5566
   1   1   1  26   0  -1   1   3   2   1   7 6.56343     5567
   1   1   1  26   0  -1   1   3   2   1   9 6.54071     5568
   1   1   1  26   0  -1   1   3   2   1  16 6.56795     5569
   1   1   1  26   0  -1   1   3   2   1  20 4.87795     5570
   1   1   1  26   0  -1   1   3   2   1  25 5.51449     5571
   1   1   1  26   0   0   0   2   1   1  16 6.82121     5572
   1   1   1  26   0   0   0   2   1   1  26 6.59829     5573
   1   1   1  26   0   0   0   2   1   1  27 6.55174     5574
   1   1   1  26   0   0   0   2   2   1  16 6.82121     5575
   1   1   1  26   0   0   0   4   1   1   6 6.78569     5576
   1   1   1  26   0   0   0   4   1   1   7 6.39960     5577
   1   1   1  26   0   0   0   4   1   1  20 6.45624     5578
   1   1   1  26   0   0   0   4   1   1  24 6.57499     5579
   1   1   1  26   0   0   0   4   1   1  25 5.84391     5580
   1   1   1  26   0   0   0   4   1   1  26 6.88287     5581
   1   1   1  26   0   0   0   4   1   1  27 6.83819     5582
   1   1   1  26   0   0   0   4   1   1  28 5.40972     5583
   1   1   1  26   0   0   0   4   2   1   6 6.78568     5584
   1   1   1  26   0   0   0   4   2   1   7 6.39959     5585
   1   1   1  26   0   0   0   4   2   1  20 6.40291     5586
   1   1   1  26   0   0   0   4   2   1  24 6.57498     5587
   1   1   1  26   0   0   0   4   2   1  25 5.84390     5588
   1   1   1  26   0   0   1   3   1   1   9 6.82438     5589
   1   1   1  26   0   0   1   3   1   1  10 6.58041     5590
   1   1   1  26   0   0   1   3   1   1  11 6.42467     5591
   1   1   1  26   0   0   1   3   1   1  12 6.63097     5592
   1   1   1  26   0   0   1   3   1   1  13 6.97599     5593
   1   1   1  26   0   0   1   3   1   1  15 6.93824     5594
   1   1   1  26   0   0   1   3   1   1  16 6.46449     5595
   1   1   1  26   0   0   1   3   1   1  17 6.83229     5596
   1   1   1  26   0   0   1   3   1   1  20 6.96512     5597
   1   1   1  26   0   0   1   3   1   1  26 6.81568     5598
   1   1   1  26   0   0   1   3   1   1  28 6.52225     5599
   1   1   1  26   0   0   1   3   2   1   9 6.82439     5600
   1   1   1  26   0   0   1   3   2   1  10 6.58041     5601
   1   1   1  26   0   0   1   3   2   1  11 6.42467     5602
   1   1   1  26   0   0   1   3   2   1  12 6.63097     5603
   1   1   1  26   0   0   1   3   2   1  13 6.97598     5604
   1   1   1  26   0   0   1   3   2   1  15 6.93823     5605
   1   1   1  26   0   0   1   3   2   1  16 6.46450     5606
   1   1   1  26   0   0   1   3   2   1  17 6.83229     5607
   1   1   1  26   0   0   1   3   2   1  20 6.95939     5608
   1   1   1  26   0   0   1   4   1   1  10 5.99903     5609
   1   1   1  26   0   0   1   4   1   1  11 5.13965     5610
   1   1   1  26   0   0   1   4   1   1  12 4.34507     5611
   1   1   1  26   0   0   1   4   1   1  13 4.49561     5612
   1   1   1  26   0   0   1   4   1   1  14 5.38273     5613
   1   1   1  26   0   0   1   4   1   1  15 6.08781     5614
   1   1   1  26   0   0   1   4   1   1  16 5.42590     5615
   1   1   1  26   0   0   1   4   1   1  17 3.99351     5616
   1   1   1  26   0   0   1   4   1   1  18 4.28704     5617
   1   1   1  26   0   0   1   4   1   1  19 5.83048     5618
   1   1   1  26   0   0   1   4   1   1  26 6.88285     5619
   1   1   1  26   0   0   1   4   2   1  10 5.99903     5620
   1   1   1  26   0   0   1   4   2   1  11 5.13966     5621
   1   1   1  26   0   0   1   4   2   1  12 4.34508     5622
   1   1   1  26   0   0   1   4   2   1  13 4.49562     5623
   1   1   1  26   0   0   1   4   2   1  14 5.38273     5624
   1   1   1  26   0   0   1   4   2   1  15 6.08781     5625
   1   1   1  26   0   0   1   4   2   1  16 5.42591     5626
   1   1   1  26   0   0   1   4   2   1  17 3.99352     5627
   1   1   1  26   0   0   1   4   2   1  18 4.28705     5628
   1   1   1  26   0   0   1   4   2   1  19 5.83048     5629
   1   1   1  26   1  -1   0   2   1   1   2 5.17402     5630
   1   1   1  26   1  -1   0   2   1   1   3 6.26861     5631
   1   1   1  26   1  -1   0   2   1   1   4 6.44880     5632
   1   1   1  26   1  -1   0   2   1   1  10 6.90722     5633
   1   1   1  26   1  -1   0   2   1   1  13 5.82930     5634
   1   1   1  26   1  -1   0   2   1   1  14 4.91807     5635
   1   1   1  26   1  -1   0   2   1   1  15 5.53582     5636
   1   1   1  26   1  -1   0   2   1   1  18 5.75195     5637
   1   1   1  26   1  -1   0   2   1   1  19 3.94194     5638
   1   1   1  26   1  -1   0   2   1   1  21 3.74819     5639
   1   1   1  26   1  -1   0   2   1   1  22 5.74331     5640
   1   1   1  26   1  -1   0   2   2   1   2 5.17402     5641
   1   1   1  26   1  -1   0   2   2   1   3 6.26862     5642
   1   1   1  26   1  -1   0   2   2   1   4 6.44881     5643
   1   1   1  26   1  -1   0   2   2   1  10 6.90723     5644
   1   1   1  26   1  -1   0   2   2   1  13 5.82930     5645
   1   1   1  26   1  -1   0   2   2   1  14 4.91808     5646
   1   1   1  26   1  -1   0   2   2   1  15 5.53583     5647
   1   1   1  26   1  -1   0   2   2   1  18 5.75196     5648
   1   1   1  26   1  -1   0   2   2   1  19 3.94194     5649
   1   1   1  26   1  -1   0   2   2   1  21 3.82642     5650
   1   1   1  26   1  -1   0   2   2   1  22 5.74331     5651
   1   1   1  26   1  -1   0   2   2   1  26 4.28737     5652
   1   1   1  26   1  -1   0   2   2   1  27 3.21380     5653
   1   1   1  26   1  -1   0   2   2   1  28 3.63723     5654
   1   1   1  26   1  -1   1   3   1   1   3 6.35642     5655
   1   1   1  26   1  -1   1   3   1   1   4 5.83259     5656
   1   1   1  26   1  -1   1   3   1   1   5 4.82619     5657
   1   1   1  26   1  -1   1   3   1   1   6 4.27576     5658
   1   1   1  26   1  -1   1   3   1   1   7 4.90302     5659
   1   1   1  26   1  -1   1   3   1   1   8 5.94842     5660
   1   1   1  26   1  -1   1   3   1   1   9 6.88798     5661
   1   1   1  26   1  -1   1   3   1   1  20 6.99292     5662
   1   1   1  26   1  -1   1   3   1   1  22 6.47157     5663
   1   1   1  26   1  -1   1   3   1   1  23 4.78250     5664
   1   1   1  26   1  -1   1   3   1   1  24 3.73314     5665
   1   1   1  26   1  -1   1   3   1   1  25 4.91507     5666
   1   1   1  26   1  -1   1   3   1   1  27 6.25524     5667
   1   1   1  26   1  -1   1   3   2   1   3 6.35642     5668
   1   1   1  26   1  -1   1   3   2   1   4 5.83259     5669
   1   1   1  26   1  -1   1   3   2   1   5 4.82619     5670
   1   1   1  26   1  -1   1   3   2   1   6 4.27575     5671
   1   1   1  26   1  -1   1   3   2   1   7 4.90302     5672
   1   1   1  26   1  -1   1   3   2   1   8 5.94841     5673
   1   1   1  26   1  -1   1   3   2   1   9 6.88797     5674
   1   1   1  26   1  -1   1   3   2   1  22 6.47157     5675
   1   1   1  26   1  -1   1   3   2   1  23 4.78250     5676
   1   1   1  26   1  -1   1   3   2   1  24 3.73314     5677
   1   1   1  26   1  -1   1   3   2   1  25 4.91507     5678
   1   1   1  26   1   0   1   3   1   1   2 5.18175     5679
   1   1   1  26   1   0   1   3   1   1   3 5.17931     5680
   1   1   1  26   1   0   1   3   1   1   4 4.57046     5681
   1   1   1  26   1   0   1   3   1   1   5 5.17771     5682
   1   1   1  26   1   0   1   3   1   1   6 6.23824     5683
   1   1   1  26   1   0   1   3   1   1   7 6.70417     5684
   1   1   1  26   1   0   1   3   1   1   8 6.26357     5685
   1   1   1  26   1   0   1   3   1   1  14 6.70105     5686
   1   1   1  26   1   0   1   3   1   1  15 6.22794     5687
   1   1   1  26   1   0   1   3   1   1  19 6.31639     5688
   1   1   1  26   1   0   1   3   1   1  21 4.45150     5689
   1   1   1  26   1   0   1   3   1   1  22 3.97705     5690
   1   1   1  26   1   0   1   3   1   1  23 5.12564     5691
   1   1   1  26   1   0   1   3   1   1  24 6.90793     5692
   1   1   1  26   1   0   1   3   2   1   2 5.18174     5693
   1   1   1  26   1   0   1   3   2   1   3 5.17931     5694
   1   1   1  26   1   0   1   3   2   1   4 4.57046     5695
   1   1   1  26   1   0   1   3   2   1   5 5.17771     5696
   1   1   1  26   1   0   1   3   2   1   6 6.23825     5697
   1   1   1  26   1   0   1   3   2   1   7 6.70418     5698
   1   1   1  26   1   0   1   3   2   1   8 6.26357     5699
   1   1   1  26   1   0   1   3   2   1  14 6.70104     5700
   1   1   1  26   1   0   1   3   2   1  15 6.22793     5701
   1   1   1  26   1   0   1   3   2   1  19 6.31637     5702
   1   1   1  26   1   0   1   3   2   1  21 4.44415     5703
   1   1   1  26   1   0   1   3   2   1  22 3.97704     5704
   1   1   1  26   1   0   1   3   2   1  23 5.12564     5705
   1   1   1  26   1   0   1   3   2   1  24 6.90794     5706
   1   1   1  26   1   0   1   3   2   1  26 3.50027     5707
   1   1   1  26   1   0   1   3   2   1  27 5.10763     5708
   1   1   1  26   1   0   1   3   2   1  28 4.29514     5709
   1   1   1  27  -1  -1   0   1   1   1  21 6.66321     5710
   1   1   1  27  -1  -1   0   1   2   1  21 6.71278     5711
   1   1   1  27  -1  -1   0   1   2   1  26 6.01096     5712
   1   1   1  27  -1  -1   0   1   2   1  27 6.92191     5713
   1   1   1  27  -1  -1   0   1   2   1  28 6.32200     5714
   1   1   1  27  -1   0   0   1   1   1   2 6.56006     5715
   1   1   1  27  -1   0   0   1   1   1   3 5.81753     5716
   1   1   1  27  -1   0   0   1   1   1   4 4.82841     5717
   1   1   1  27  -1   0   0   1   1   1   5 4.52738     5718
   1   1   1  27  -1   0   0   1   1   1   6 5.27507     5719
   1   1   1  27  -1   0   0   1   1   1   7 6.15757     5720
   1   1   1  27  -1   0   0   1   1   1   8 6.43741     5721
   1   1   1  27  -1   0   0   1   1   1  21 6.46062     5722
   1   1   1  27  -1   0   0   1   1   1  22 4.65424     5723
   1   1   1  27  -1   0   0   1   1   1  23 4.09675     5724
   1   1   1  27  -1   0   0   1   1   1  24 5.44352     5725
   1   1   1  27  -1   0   0   1   1   1  25 6.89855     5726
   1   1   1  27  -1   0   0   1   2   1   2 6.56007     5727
   1   1   1  27  -1   0   0   1   2   1   3 5.81754     5728
   1   1   1  27  -1   0   0   1   2   1   4 4.82841     5729
   1   1   1  27  -1   0   0   1   2   1   5 4.52738     5730
   1   1   1  27  -1   0   0   1   2   1   6 5.27507     5731
   1   1   1  27  -1   0   0   1   2   1   7 6.15757     5732
   1   1   1  27  -1   0   0   1   2   1   8 6.43742     5733
   1   1   1  27  -1   0   0   1   2   1  21 6.46053     5734
   1   1   1  27  -1   0   0   1   2   1  22 4.65425     5735
   1   1   1  27  -1   0   0   1   2   1  23 4.09675     5736
   1   1   1  27  -1   0   0   1   2   1  24 5.44352     5737
   1   1   1  27  -1   0   0   1   2   1  25 6.89855     5738
   1   1   1  27  -1   0   0   1   2   1  26 6.21851     5739
   1   1   1  27  -1   0   0   1   2   1  27 6.19170     5740
   1   1   1  27  -1   0   0   4   1   1   4 6.90134     5741
   1   1   1  27  -1   0   0   4   1   1   5 6.00870     5742
   1   1   1  27  -1   0   0   4   1   1   6 6.53136     5743
   1   1   1  27  -1   0   0   4   1   1  22 6.83276     5744
   1   1   1  27  -1   0   0   4   1   1  23 5.10717     5745
   1   1   1  27  -1   0   0   4   1   1  24 6.13811     5746
   1   1   1  27  -1   0   0   4   2   1   4 6.90134     5747
   1   1   1  27  -1   0   0   4   2   1   5 6.00871     5748
   1   1   1  27  -1   0   0   4   2   1   6 6.53136     5749
   1   1   1  27  -1   0   0   4   2   1  22 6.83277     5750
   1   1   1  27  -1   0   0   4   2   1  23 5.10718     5751
   1   1   1  27  -1   0   0   4   2   1  24 6.13812     5752
   1   1   1  27  -1   0   1   4   2   1  27 6.29667     5753
   1   1   1  27   0  -1   0   1   1   1   2 6.89874     5754
   1   1   1  27   0  -1   0   1   1   1  12 6.94801     5755
   1   1   1  27   0  -1   0   1   1   1  13 6.37480     5756
   1   1   1  27   0  -1   0   1   1   1  14 6.19787     5757
   1   1   1  27   0  -1   0   1   1   1  15 6.61492     5758
   1   1   1  27   0  -1   0   1   1   1  18 6.37447     5759
   1   1   1  27   0  -1   0   1   1   1  19 6.06184     5760
   1   1   1  27   0  -1   0   1   1   1  21 6.79140     5761
   1   1   1  27   0  -1   0   1   2   1   2 6.89873     5762
   1   1   1  27   0  -1   0   1   2   1  12 6.94801     5763
   1   1   1  27   0  -1   0   1   2   1  13 6.37480     5764
   1   1   1  27   0  -1   0   1   2   1  14 6.19787     5765
   1   1   1  27   0  -1   0   1   2   1  15 6.61492     5766
   1   1   1  27   0  -1   0   1   2   1  18 6.37447     5767
   1   1   1  27   0  -1   0   1   2   1  19 6.06184     5768
   1   1   1  27   0  -1   0   1   2   1  21 6.76848     5769
   1   1   1  27   0  -1   0   1   2   1  26 6.75442     5770
   1   1   1  27   0  -1   0   1   2   1  28 5.98525     5771
   1   1   1  27   0  -1   0   2   1   1  10 6.01630     5772
   1   1   1  27   0  -1   0   2   1   1  11 4.70646     5773
   1   1   1  27   0  -1   0   2   1   1  12 3.63232     5774
   1   1   1  27   0  -1   0   2   1   1  13 4.16296     5775
   1   1   1  27   0  -1   0   2   1   1  14 5.51124     5776
   1   1   1  27   0  -1   0   2   1   1  15 6.33633     5777
   1   1   1  27   0  -1   0   2   1   1  16 4.78614     5778
   1   1   1  27   0  -1   0   2   1   1  17 2.63365     5779
   1   1   1  27   0  -1   0   2   1   1  18 3.77174     5780
   1   1   1  27   0  -1   0   2   1   1  19 6.12873     5781
   1   1   1  27   0  -1   0   2   1   1  26 6.55174     5782
   1   1   1  27   0  -1   0   2   2   1  10 6.01630     5783
   1   1   1  27   0  -1   0   2   2   1  11 4.70647     5784
   1   1   1  27   0  -1   0   2   2   1  12 3.63232     5785
   1   1   1  27   0  -1   0   2   2   1  13 4.16296     5786
   1   1   1  27   0  -1   0   2   2   1  14 5.51124     5787
   1   1   1  27   0  -1   0   2   2   1  15 6.33633     5788
   1   1   1  27   0  -1   0   2   2   1  16 4.78614     5789
   1   1   1  27   0  -1   0   2   2   1  17 2.63365     5790
   1   1   1  27   0  -1   0   2   2   1  18 3.77174     5791
   1   1   1  27   0  -1   0   2   2   1  19 6.12873     5792
   1   1   1  27   0  -1   1   3   1   1   9 6.45328     5793
   1   1   1  27   0  -1   1   3   1   1  11 6.87343     5794
   1   1   1  27   0  -1   1   3   1   1  16 5.87978     5795
   1   1   1  27   0  -1   1   3   1   1  20 4.82423     5796
   1   1   1  27   0  -1   1   3   1   1  25 6.03720     5797
   1   1   1  27   0  -1   1   3   1   1  26 4.48880     5798
   1   1   1  27   0  -1   1   3   1   1  27 4.66147     5799
   1   1   1  27   0  -1   1   3   1   1  28 4.58938     5800
   1   1   1  27   0  -1   1   3   2   1   9 6.45328     5801
   1   1   1  27   0  -1   1   3   2   1  11 6.87343     5802
   1   1   1  27   0  -1   1   3   2   1  16 5.87978     5803
   1   1   1  27   0  -1   1   3   2   1  20 4.74507     5804
   1   1   1  27   0  -1   1   3   2   1  25 6.03720     5805
   1   1   1  27   0   0   0   4   1   1   6 6.57504     5806
   1   1   1  27   0   0   0   4   1   1   7 6.45400     5807
   1   1   1  27   0   0   0   4   1   1  24 6.37244     5808
   1   1   1  27   0   0   0   4   1   1  25 6.14731     5809
   1   1   1  27   0   0   0   4   1   1  28 6.07391     5810
   1   1   1  27   0   0   0   4   2   1   6 6.57504     5811
   1   1   1  27   0   0   0   4   2   1   7 6.45399     5812
   1   1   1  27   0   0   0   4   2   1  24 6.37243     5813
   1   1   1  27   0   0   0   4   2   1  25 6.14730     5814
   1   1   1  27   0   0   1   4   1   1   2 6.07860     5815
   1   1   1  27   0   0   1   4   1   1   9 6.51024     5816
   1   1   1  27   0   0   1   4   1   1  10 5.30850     5817
   1   1   1  27   0   0   1   4   1   1  11 4.70968     5818
   1   1   1  27   0   0   1   4   1   1  12 3.78012     5819
   1   1   1  27   0   0   1   4   1   1  13 3.42859     5820
   1   1   1  27   0   0   1   4   1   1  14 4.12910     5821
   1   1   1  27   0   0   1   4   1   1  15 5.03433     5822
   1   1   1  27   0   0   1   4   1   1  16 5.31173     5823
   1   1   1  27   0   0   1   4   1   1  17 3.75458     5824
   1   1   1  27   0   0   1   4   1   1  18 3.11484     5825
   1   1   1  27   0   0   1   4   1   1  19 4.37299     5826
   1   1   1  27   0   0   1   4   1   1  21 6.42984     5827
   1   1   1  27   0   0   1   4   1   1  26 6.83818     5828
   1   1   1  27   0   0   1   4   2   1   2 6.07859     5829
   1   1   1  27   0   0   1   4   2   1   9 6.51024     5830
   1   1   1  27   0   0   1   4   2   1  10 5.30851     5831
   1   1   1  27   0   0   1   4   2   1  11 4.70969     5832
   1   1   1  27   0   0   1   4   2   1  12 3.78013     5833
   1   1   1  27   0   0   1   4   2   1  13 3.42860     5834
   1   1   1  27   0   0   1   4   2   1  14 4.12910     5835
   1   1   1  27   0   0   1   4   2   1  15 5.03433     5836
   1   1   1  27   0   0   1   4   2   1  16 5.31174     5837
   1   1   1  27   0   0   1   4   2   1  17 3.75460     5838
   1   1   1  27   0   0   1   4   2   1  18 3.11485     5839
   1   1   1  27   0   0   1   4   2   1  19 4.37299     5840
   1   1   1  27   0   0   1   4   2   1  21 6.42820     5841
   1   1   1  27   0   0   1   4   2   1  27 6.06912     5842
   1   1   1  27   0   0   1   4   2   1  28 6.39194     5843
   1   1   1  27   1  -1   0   2   1   1   2 4.66266     5844
   1   1   1  27   1  -1   0   2   1   1   3 5.83682     5845
   1   1   1  27   1  -1   0   2   1   1   4 6.31929     5846
   1   1   1  27   1  -1   0   2   1   1   8 6.86648     5847
   1   1   1  27   1  -1   0   2   1   1   9 6.90097     5848
   1   1   1  27   1  -1   0   2   1   1  10 5.93563     5849
   1   1   1  27   1  -1   0   2   1   1  11 6.42897     5850
   1   1   1  27   1  -1   0   2   1   1  12 5.90894     5851
   1   1   1  27   1  -1   0   2   1   1  13 4.70636     5852
   1   1   1  27   1  -1   0   2   1   1  14 3.97813     5853
   1   1   1  27   1  -1   0   2   1   1  15 4.69852     5854
   1   1   1  27   1  -1   0   2   1   1  17 6.62703     5855
   1   1   1  27   1  -1   0   2   1   1  18 4.63414     5856
   1   1   1  27   1  -1   0   2   1   1  19 3.18184     5857
   1   1   1  27   1  -1   0   2   1   1  21 3.70211     5858
   1   1   1  27   1  -1   0   2   1   1  22 5.85674     5859
   1   1   1  27   1  -1   0   2   2   1   2 4.66266     5860
   1   1   1  27   1  -1   0   2   2   1   3 5.83683     5861
   1   1   1  27   1  -1   0   2   2   1   4 6.31930     5862
   1   1   1  27   1  -1   0   2   2   1   8 6.86648     5863
   1   1   1  27   1  -1   0   2   2   1   9 6.90098     5864
   1   1   1  27   1  -1   0   2   2   1  10 5.93563     5865
   1   1   1  27   1  -1   0   2   2   1  11 6.42897     5866
   1   1   1  27   1  -1   0   2   2   1  12 5.90895     5867
   1   1   1  27   1  -1   0   2   2   1  13 4.70637     5868
   1   1   1  27   1  -1   0   2   2   1  14 3.97814     5869
   1   1   1  27   1  -1   0   2   2   1  15 4.69853     5870
   1   1   1  27   1  -1   0   2   2   1  17 6.62703     5871
   1   1   1  27   1  -1   0   2   2   1  18 4.63414     5872
   1   1   1  27   1  -1   0   2   2   1  19 3.18185     5873
   1   1   1  27   1  -1   0   2   2   1  21 3.76037     5874
   1   1   1  27   1  -1   0   2   2   1  22 5.85675     5875
   1   1   1  27   1  -1   0   2   2   1  26 4.54513     5876
   1   1   1  27   1  -1   0   2   2   1  27 3.05838     5877
   1   1   1  27   1  -1   0   2   2   1  28 3.70564     5878
   1   1   1  27   1  -1   1   2   1   1  23 6.91404     5879
   1   1   1  27   1  -1   1   2   1   1  24 6.90154     5880
   1   1   1  27   1  -1   1   2   2   1  23 6.91403     5881
   1   1   1  27   1  -1   1   2   2   1  24 6.90152     5882
   1   1   1  27   1  -1   1   3   1   1   2 6.12289     5883
   1   1   1  27   1  -1   1   3   1   1   3 4.89322     5884
   1   1   1  27   1  -1   1   3   1   1   4 4.60760     5885
   1   1   1  27   1  -1   1   3   1   1   5 3.72270     5886
   1   1   1  27   1  -1   1   3   1   1   6 2.95398     5887
   1   1   1  27   1  -1   1   3   1   1   7 3.32105     5888
   1   1   1  27   1  -1   1   3   1   1   8 4.33363     5889
   1   1   1  27   1  -1   1   3   1   1   9 5.21985     5890
   1   1   1  27   1  -1   1   3   1   1  10 6.39384     5891
   1   1   1  27   1  -1   1   3   1   1  15 6.80441     5892
   1   1   1  27   1  -1   1   3   1   1  20 5.34549     5893
   1   1   1  27   1  -1   1   3   1   1  22 5.40758     5894
   1   1   1  27   1  -1   1   3   1   1  23 4.02261     5895
   1   1   1  27   1  -1   1   3   1   1  24 2.65609     5896
   1   1   1  27   1  -1   1   3   1   1  25 3.33688     5897
   1   1   1  27   1  -1   1   3   1   1  26 6.25524     5898
   1   1   1  27   1  -1   1   3   1   1  27 4.65260     5899
   1   1   1  27   1  -1   1   3   1   1  28 5.41594     5900
   1   1   1  27   1  -1   1   3   2   1   2 6.12289     5901
   1   1   1  27   1  -1   1   3   2   1   3 4.89322     5902
   1   1   1  27   1  -1   1   3   2   1   4 4.60760     5903
   1   1   1  27   1  -1   1   3   2   1   5 3.72270     5904
   1   1   1  27   1  -1   1   3   2   1   6 2.95398     5905
   1   1   1  27   1  -1   1   3   2   1   7 3.32105     5906
   1   1   1  27   1  -1   1   3   2   1   8 4.33363     5907
   1   1   1  27   1  -1   1   3   2   1   9 5.21985     5908
   1   1   1  27   1  -1   1   3   2   1  10 6.39383     5909
   1   1   1  27   1  -1   1   3   2   1  15 6.80440     5910
   1   1   1  27   1  -1   1   3   2   1  20 5.36583     5911
   1   1   1  27   1  -1   1   3   2   1  22 5.40758     5912
   1   1   1  27   1  -1   1   3   2   1  23 4.02261     5913
   1   1   1  27   1  -1   1   3   2   1  24 2.65609     5914
   1   1   1  27   1  -1   1   3   2   1  25 3.33687     5915
   1   1   1  27   1   0   1   3   1   1   2 5.30745     5916
   1   1   1  27   1   0   1   3   1   1   3 5.62680     5917
   1   1   1  27   1   0   1   3   1   1   4 5.42181     5918
   1   1   1  27   1   0   1   3   1   1   5 6.21861     5919
   1   1   1  27   1   0   1   3   1   1   8 6.62759     5920
   1   1   1  27   1   0   1   3   1   1  10 6.97536     5921
   1   1   1  27   1   0   1   3   1   1  14 6.24413     5922
   1   1   1  27   1   0   1   3   1   1  15 6.03751     5923
   1   1   1  27   1   0   1   3   1   1  19 5.83303     5924
   1   1   1  27   1   0   1   3   1   1  21 4.61266     5925
   1   1   1  27   1   0   1   3   1   1  22 4.94710     5926
   1   1   1  27   1   0   1   3   1   1  23 6.39354     5927
   1   1   1  27   1   0   1   3   2   1   2 5.30744     5928
   1   1   1  27   1   0   1   3   2   1   3 5.62680     5929
   1   1   1  27   1   0   1   3   2   1   4 5.42180     5930
   1   1   1  27   1   0   1   3   2   1   5 6.21861     5931
   1   1   1  27   1   0   1   3   2   1   8 6.62760     5932
   1   1   1  27   1   0   1   3   2   1  10 6.97536     5933
   1   1   1  27   1   0   1   3   2   1  14 6.24412     5934
   1   1   1  27   1   0   1   3   2   1  15 6.03750     5935
   1   1   1  27   1   0   1   3   2   1  19 5.83301     5936
   1   1   1  27   1   0   1   3   2   1  21 4.60415     5937
   1   1   1  27   1   0   1   3   2   1  22 4.94709     5938
   1   1   1  27   1   0   1   3   2   1  23 6.39354     5939
   1   1   1  27   1   0   1   3   2   1  26 3.89869     5940
   1   1   1  27   1   0   1   3   2   1  27 5.33151     5941
   1   1   1  27   1   0   1   3   2   1  28 4.13627     5942
   1   1   1  27   1   0   1   4   1   1  17 6.65010     5943
   1   1   1  27   1   0   1   4   2   1  17 6.65010     5944
   1   1   1  28  -1  -1   0   1   2   1  26 6.93916     5945
   1   1   1  28  -1   0   0   1   1   1   2 5.84489     5946
   1   1   1  28  -1   0   0   1   1   1   3 4.98615     5947
   1   1   1  28  -1   0   0   1   1   1   4 3.75186     5948
   1   1   1  28  -1   0   0   1   1   1   5 3.33336     5949
   1   1   1  28  -1   0   0   1   1   1   6 4.31205     5950
   1   1   1  28  -1   0   0   1   1   1   7 5.38084     5951
   1   1   1  28  -1   0   0   1   1   1   8 5.70993     5952
   1   1   1  28  -1   0   0   1   1   1  21 5.71974     5953
   1   1   1  28  -1   0   0   1   1   1  22 3.51446     5954
   1   1   1  28  -1   0   0   1   1   1  23 2.67484     5955
   1   1   1  28  -1   0   0   1   1   1  24 4.50629     5956
   1   1   1  28  -1   0   0   1   1   1  25 6.22491     5957
   1   1   1  28  -1   0   0   1   2   1   2 5.84489     5958
   1   1   1  28  -1   0   0   1   2   1   3 4.98615     5959
   1   1   1  28  -1   0   0   1   2   1   4 3.75186     5960
   1   1   1  28  -1   0   0   1   2   1   5 3.33336     5961
   1   1   1  28  -1   0   0   1   2   1   6 4.31205     5962
   1   1   1  28  -1   0   0   1   2   1   7 5.38084     5963
   1   1   1  28  -1   0   0   1   2   1   8 5.70993     5964
   1   1   1  28  -1   0   0   1   2   1  21 5.71211     5965
   1   1   1  28  -1   0   0   1   2   1  22 3.51446     5966
   1   1   1  28  -1   0   0   1   2   1  23 2.67484     5967
   1   1   1  28  -1   0   0   1   2   1  24 4.50629     5968
   1   1   1  28  -1   0   0   1   2   1  25 6.22491     5969
   1   1   1  28  -1   0   0   1   2   1  26 5.25688     5970
   1   1   1  28  -1   0   0   1   2   1  27 5.64567     5971
   1   1   1  28  -1   0   0   1   2   1  28 6.55424     5972
   1   1   1  28  -1   0   0   4   1   1   5 6.60327     5973
   1   1   1  28  -1   0   0   4   1   1   6 6.80227     5974
   1   1   1  28  -1   0   0   4   1   1  23 5.77638     5975
   1   1   1  28  -1   0   0   4   1   1  24 6.17193     5976
   1   1   1  28  -1   0   0   4   2   1   5 6.60327     5977
   1   1   1  28  -1   0   0   4   2   1   6 6.80228     5978
   1   1   1  28  -1   0   0   4   2   1  23 5.77638     5979
   1   1   1  28  -1   0   0   4   2   1  24 6.17194     5980
   1   1   1  28  -1   0   1   4   1   1  21 6.37354     5981
   1   1   1  28  -1   0   1   4   1   1  22 6.96616     5982
   1   1   1  28  -1   0   1   4   2   1  21 6.42898     5983
   1   1   1  28  -1   0   1   4   2   1  22 6.96616     5984
   1   1   1  28  -1   0   1   4   2   1  26 6.80781     5985
   1   1   1  28  -1   0   1   4   2   1  27 5.58925     5986
   1   1   1  28  -1   0   1   4   2   1  28 6.92098     5987
   1   1   1  28   0  -1   0   2   1   1  10 6.90658     5988
   1   1   1  28   0  -1   0   2   1   1  11 5.76317     5989
   1   1   1  28   0  -1   0   2   1   1  12 4.49258     5990
   1   1   1  28   0  -1   0   2   1   1  13 4.52075     5991
   1   1   1  28   0  -1   0   2   1   1  14 5.80482     5992
   1   1   1  28   0  -1   0   2   1   1  15 6.90249     5993
   1   1   1  28   0  -1   0   2   1   1  16 6.07615     5994
   1   1   1  28   0  -1   0   2   1   1  17 3.69871     5995
   1   1   1  28   0  -1   0   2   1   1  18 3.75961     5996
   1   1   1  28   0  -1   0   2   1   1  19 6.15234     5997
   1   1   1  28   0  -1   0   2   2   1  10 6.90658     5998
   1   1   1  28   0  -1   0   2   2   1  11 5.76317     5999
   1   1   1  28   0  -1   0   2   2   1  12 4.49258     6000
   1   1   1  28   0  -1   0   2   2   1  13 4.52075     6001
   1   1   1  28   0  -1   0   2   2   1  14 5.80482     6002
   1   1   1  28   0  -1   0   2   2   1  15 6.90249     6003
   1   1   1  28   0  -1   0   2   2   1  16 6.07615     6004
   1   1   1  28   0  -1   0   2   2   1  17 3.69872     6005
   1   1   1  28   0  -1   0   2   2   1  18 3.75961     6006
   1   1   1  28   0  -1   0   2   2   1  19 6.15234     6007
   1   1   1  28   0  -1   1   3   1   1   9 6.63102     6008
   1   1   1  28   0  -1   1   3   1   1  16 6.03694     6009
   1   1   1  28   0  -1   1   3   1   1  20 5.03589     6010
   1   1   1  28   0  -1   1   3   1   1  25 6.24737     6011
   1   1   1  28   0  -1   1   3   1   1  26 4.69305     6012
   1   1   1  28   0  -1   1   3   1   1  27 4.58938     6013
   1   1   1  28   0  -1   1   3   1   1  28 5.09089     6014
   1   1   1  28   0  -1   1   3   2   1   9 6.63101     6015
   1   1   1  28   0  -1   1   3   2   1  16 6.03694     6016
   1   1   1  28   0  -1   1   3   2   1  20 4.96877     6017
   1   1   1  28   0  -1   1   3   2   1  25 6.24736     6018
   1   1   1  28   0   0   0   4   1   1  25 6.84941     6019
   1   1   1  28   0   0   0   4   1   1  28 6.85597     6020
   1   1   1  28   0   0   0   4   2   1  25 6.84940     6021
   1   1   1  28   0   0   1   3   1   1   9 6.78250     6022
   1   1   1  28   0   0   1   3   1   1  10 6.25644     6023
   1   1   1  28   0   0   1   3   1   1  11 5.75481     6024
   1   1   1  28   0   0   1   3   1   1  12 5.69192     6025
   1   1   1  28   0   0   1   3   1   1  13 6.11430     6026
   1   1   1  28   0   0   1   3   1   1  14 6.56780     6027
   1   1   1  28   0   0   1   3   1   1  15 6.64808     6028
   1   1   1  28   0   0   1   3   1   1  16 5.77381     6029
   1   1   1  28   0   0   1   3   1   1  17 5.66809     6030
   1   1   1  28   0   0   1   3   1   1  18 6.38729     6031
   1   1   1  28   0   0   1   3   1   1  20 6.89748     6032
   1   1   1  28   0   0   1   3   1   1  26 6.52225     6033
   1   1   1  28   0   0   1   3   1   1  28 6.68377     6034
   1   1   1  28   0   0   1   3   2   1   9 6.78250     6035
   1   1   1  28   0   0   1   3   2   1  10 6.25644     6036
   1   1   1  28   0   0   1   3   2   1  11 5.75482     6037
   1   1   1  28   0   0   1   3   2   1  12 5.69192     6038
   1   1   1  28   0   0   1   3   2   1  13 6.11429     6039
   1   1   1  28   0   0   1   3   2   1  14 6.56780     6040
   1   1   1  28   0   0   1   3   2   1  15 6.64807     6041
   1   1   1  28   0   0   1   3   2   1  16 5.77382     6042
   1   1   1  28   0   0   1   3   2   1  17 5.66809     6043
   1   1   1  28   0   0   1   3   2   1  18 6.38728     6044
   1   1   1  28   0   0   1   3   2   1  20 6.89697     6045
   1   1   1  28   0   0   1   4   1   1   2 5.58552     6046
   1   1   1  28   0   0   1   4   1   1   3 6.43498     6047
   1   1   1  28   0   0   1   4   1   1   8 6.32908     6048
   1   1   1  28   0   0   1   4   1   1   9 5.36648     6049
   1   1   1  28   0   0   1   4   1   1  10 4.33234     6050
   1   1   1  28   0   0   1   4   1   1  11 3.63478     6051
   1   1   1  28   0   0   1   4   1   1  12 3.06492     6052
   1   1   1  28   0   0   1   4   1   1  13 3.27753     6053
   1   1   1  28   0   0   1   4   1   1  14 3.97760     6054
   1   1   1  28   0   0   1   4   1   1  15 4.46577     6055
   1   1   1  28   0   0   1   4   1   1  16 4.03682     6056
   1   1   1  28   0   0   1   4   1   1  17 3.07351     6057
   1   1   1  28   0   0   1   4   1   1  18 3.44783     6058
   1   1   1  28   0   0   1   4   1   1  19 4.57461     6059
   1   1   1  28   0   0   1   4   1   1  20 5.86872     6060
   1   1   1  28   0   0   1   4   1   1  21 6.35288     6061
   1   1   1  28   0   0   1   4   1   1  26 5.40970     6062
   1   1   1  28   0   0   1   4   1   1  27 6.07390     6063
   1   1   1  28   0   0   1   4   1   1  28 6.85596     6064
   1   1   1  28   0   0   1   4   2   1   2 5.58551     6065
   1   1   1  28   0   0   1   4   2   1   3 6.43497     6066
   1   1   1  28   0   0   1   4   2   1   8 6.32907     6067
   1   1   1  28   0   0   1   4   2   1   9 5.36649     6068
   1   1   1  28   0   0   1   4   2   1  10 4.33235     6069
   1   1   1  28   0   0   1   4   2   1  11 3.63480     6070
   1   1   1  28   0   0   1   4   2   1  12 3.06494     6071
   1   1   1  28   0   0   1   4   2   1  13 3.27754     6072
   1   1   1  28   0   0   1   4   2   1  14 3.97759     6073
   1   1   1  28   0   0   1   4   2   1  15 4.46577     6074
   1   1   1  28   0   0   1   4   2   1  16 4.03684     6075
   1   1   1  28   0   0   1   4   2   1  17 3.07353     6076
   1   1   1  28   0   0   1   4   2   1  18 3.44784     6077
   1   1   1  28   0   0   1   4   2   1  19 4.57460     6078
   1   1   1  28   0   0   1   4   2   1  20 5.92758     6079
   1   1   1  28   0   0   1   4   2   1  21 6.33206     6080
   1   1   1  28   0   0   1   4   2   1  27 6.06454     6081
   1   1   1  28   0   0   1   4   2   1  28 6.46282     6082
   1   1   1  28   0   1   1   4   1   1  18 6.77673     6083
   1   1   1  28   0   1   1   4   2   1  18 6.77673     6084
   1   1   1  28   1  -1   0   2   1   1   2 6.15941     6085
   1   1   1  28   1  -1   0   2   1   1  13 5.79737     6086
   1   1   1  28   1  -1   0   2   1   1  14 5.24408     6087
   1   1   1  28   1  -1   0   2   1   1  15 6.15825     6088
   1   1   1  28   1  -1   0   2   1   1  18 5.45312     6089
   1   1   1  28   1  -1   0   2   1   1  19 4.33206     6090
   1   1   1  28   1  -1   0   2   1   1  21 5.01358     6091
   1   1   1  28   1  -1   0   2   2   1   2 6.15942     6092
   1   1   1  28   1  -1   0   2   2   1  13 5.79738     6093
   1   1   1  28   1  -1   0   2   2   1  14 5.24408     6094
   1   1   1  28   1  -1   0   2   2   1  15 6.15826     6095
   1   1   1  28   1  -1   0   2   2   1  18 5.45313     6096
   1   1   1  28   1  -1   0   2   2   1  19 4.33207     6097
   1   1   1  28   1  -1   0   2   2   1  21 5.08071     6098
   1   1   1  28   1  -1   0   2   2   1  26 5.73350     6099
   1   1   1  28   1  -1   0   2   2   1  27 4.45599     6100
   1   1   1  28   1  -1   0   2   2   1  28 4.82362     6101
   1   1   1  28   1  -1   1   2   1   1   5 6.81344     6102
   1   1   1  28   1  -1   1   2   1   1  23 6.52797     6103
   1   1   1  28   1  -1   1   2   2   1   5 6.81343     6104
   1   1   1  28   1  -1   1   2   2   1  23 6.52796     6105
   1   1   1  28   1  -1   1   3   1   1   2 6.96099     6106
   1   1   1  28   1  -1   1   3   1   1   3 5.91773     6107
   1   1   1  28   1  -1   1   3   1   1   4 5.70622     6108
   1   1   1  28   1  -1   1   3   1   1   5 5.03371     6109
   1   1   1  28   1  -1   1   3   1   1   6 4.47800     6110
   1   1   1  28   1  -1   1   3   1   1   7 4.69952     6111
   1   1   1  28   1  -1   1   3   1   1   8 5.45081     6112
   1   1   1  28   1  -1   1   3   1   1   9 6.15833     6113
   1   1   1  28   1  -1   1   3   1   1  20 6.24612     6114
   1   1   1  28   1  -1   1   3   1   1  22 6.37546     6115
   1   1   1  28   1  -1   1   3   1   1  23 5.28242     6116
   1   1   1  28   1  -1   1   3   1   1  24 4.29814     6117
   1   1   1  28   1  -1   1   3   1   1  25 4.69779     6118
   1   1   1  28   1  -1   1   3   1   1  27 5.41594     6119
   1   1   1  28   1  -1   1   3   1   1  28 6.52227     6120
   1   1   1  28   1  -1   1   3   2   1   2 6.96099     6121
   1   1   1  28   1  -1   1   3   2   1   3 5.91773     6122
   1   1   1  28   1  -1   1   3   2   1   4 5.70623     6123
   1   1   1  28   1  -1   1   3   2   1   5 5.03372     6124
   1   1   1  28   1  -1   1   3   2   1   6 4.47800     6125
   1   1   1  28   1  -1   1   3   2   1   7 4.69952     6126
   1   1   1  28   1  -1   1   3   2   1   8 5.45080     6127
   1   1   1  28   1  -1   1   3   2   1   9 6.15833     6128
   1   1   1  28   1  -1   1   3   2   1  20 6.27040     6129
   1   1   1  28   1  -1   1   3   2   1  22 6.37546     6130
   1   1   1  28   1  -1   1   3   2   1  23 5.28242     6131
   1   1   1  28   1  -1   1   3   2   1  24 4.29814     6132
   1   1   1  28   1  -1   1   3   2   1  25 4.69779     6133
   1   1   1  28   1   0   1   2   1   1  24 6.00337     6134
   1   1   1  28   1   0   1   2   2   1  24 6.00337     6135
   1   1   1  28   1   0   1   3   1   1   2 4.00991     6136
   1   1   1  28   1   0   1   3   1   1   3 4.43637     6137
   1   1   1  28   1   0   1   3   1   1   4 4.20376     6138
   1   1   1  28   1   0   1   3   1   1   5 5.20533     6139
   1   1   1  28   1   0   1   3   1   1   6 6.23913     6140
   1   1   1  28   1   0   1   3   1   1   7 6.42125     6141
   1   1   1  28   1   0   1   3   1   1   8 5.63920     6142
   1   1   1  28   1   0   1   3   1   1   9 6.32116     6143
   1   1   1  28   1   0   1   3   1   1  10 6.01591     6144
   1   1   1  28   1   0   1   3   1   1  13 6.34166     6145
   1   1   1  28   1   0   1   3   1   1  14 5.15754     6146
   1   1   1  28   1   0   1   3   1   1  15 4.91288     6147
   1   1   1  28   1   0   1   3   1   1  18 6.78668     6148
   1   1   1  28   1   0   1   3   1   1  19 4.66346     6149
   1   1   1  28   1   0   1   3   1   1  21 3.05602     6150
   1   1   1  28   1   0   1   3   1   1  22 3.58090     6151
   1   1   1  28   1   0   1   3   1   1  23 5.43549     6152
   1   1   1  28   1   0   1   3   2   1   2 4.00990     6153
   1   1   1  28   1   0   1   3   2   1   3 4.43637     6154
   1   1   1  28   1   0   1   3   2   1   4 4.20376     6155
   1   1   1  28   1   0   1   3   2   1   5 5.20533     6156
   1   1   1  28   1   0   1   3   2   1   6 6.23914     6157
   1   1   1  28   1   0   1   3   2   1   7 6.42126     6158
   1   1   1  28   1   0   1   3   2   1   8 5.63920     6159
   1   1   1  28   1   0   1   3   2   1   9 6.32116     6160
   1   1   1  28   1   0   1   3   2   1  10 6.01591     6161
   1   1   1  28   1   0   1   3   2   1  13 6.34165     6162
   1   1   1  28   1   0   1   3   2   1  14 5.15753     6163
   1   1   1  28   1   0   1   3   2   1  15 4.91287     6164
   1   1   1  28   1   0   1   3   2   1  18 6.78667     6165
   1   1   1  28   1   0   1   3   2   1  19 4.66344     6166
   1   1   1  28   1   0   1   3   2   1  21 3.05730     6167
   1   1   1  28   1   0   1   3   2   1  22 3.58090     6168
   1   1   1  28   1   0   1   3   2   1  23 5.43549     6169
   1   1   1  28   1   0   1   3   2   1  26 2.29640     6170
   1   1   1  28   1   0   1   3   2   1  27 3.73190     6171
   1   1   1  28   1   0   1   3   2   1  28 2.68770     6172
   1   1   1  28   1   0   1   4   1   1  17 6.92287     6173
   1   1   1  28   1   0   1   4   2   1  17 6.92286     6174
   1   2   1   2  -1   0   0   1   1   1  22 6.15841     6175
   1   2   1   2  -1   0   0   1   1   1  23 6.85410     6176
   1   2   1   2  -1   0   0   1   2   1  22 6.15841     6177
   1   2   1   2  -1   0   0   1   2   1  23 6.85410     6178
   1   2   1   2  -1   0   0   1   2   1  26 6.60744     6179
   1   2   1   2  -1   0   0   1   2   1  27 6.71487     6180
   1   2   1   2  -1   0   0   4   1   1  23 6.54026     6181
   1   2   1   2  -1   0   0   4   2   1  23 6.54026     6182
   1   2   1   2   0  -1   0   2   1   1  17 6.85616     6183
   1   2   1   2   0  -1   0   2   2   1  17 6.85616     6184
   1   2   1   2   0   0   0   2   1   1  16 6.51397     6185
   1   2   1   2   0   0   0   2   1   1  17 6.91860     6186
   1   2   1   2   0   0   0   2   1   1  26 6.75976     6187
   1   2   1   2   0   0   0   2   2   1  16 6.51397     6188
   1   2   1   2   0   0   0   2   2   1  17 6.91859     6189
   1   2   1   2   0   0   0   4   1   1   3 6.64461     6190
   1   2   1   2   0   0   0   4   1   1   4 6.31059     6191
   1   2   1   2   0   0   0   4   1   1   5 5.11837     6192
   1   2   1   2   0   0   0   4   1   1   6 4.03586     6193
   1   2   1   2   0   0   0   4   1   1   7 4.47294     6194
   1   2   1   2   0   0   0   4   1   1   8 5.83816     6195
   1   2   1   2   0   0   0   4   1   1   9 6.63489     6196
   1   2   1   2   0   0   0   4   1   1  20 6.31936     6197
   1   2   1   2   0   0   0   4   1   1  23 5.22096     6198
   1   2   1   2   0   0   0   4   1   1  24 3.12536     6199
   1   2   1   2   0   0   0   4   1   1  25 4.04482     6200
   1   2   1   2   0   0   0   4   1   1  27 6.07859     6201
   1   2   1   2   0   0   0   4   1   1  28 5.58551     6202
   1   2   1   2   0   0   0   4   2   1   3 6.64460     6203
   1   2   1   2   0   0   0   4   2   1   4 6.31059     6204
   1   2   1   2   0   0   0   4   2   1   5 5.11837     6205
   1   2   1   2   0   0   0   4   2   1   6 4.03586     6206
   1   2   1   2   0   0   0   4   2   1   7 4.47294     6207
   1   2   1   2   0   0   0   4   2   1   8 5.83816     6208
   1   2   1   2   0   0   0   4   2   1   9 6.63489     6209
   1   2   1   2   0   0   0   4   2   1  20 6.29425     6210
   1   2   1   2   0   0   0   4   2   1  23 5.22095     6211
   1   2   1   2   0   0   0   4   2   1  24 3.12536     6212
   1   2   1   2   0   0   0   4   2   1  25 4.04482     6213
   1   2   1   2   0   1   0   1   1   1  27 6.89873     6214
   1   2   1   2   0   1   1   4   1   1  18 6.32995     6215
   1   2   1   2   0   1   1   4   1   1  19 6.31010     6216
   1   2   1   2   0   1   1   4   2   1  18 6.32996     6217
   1   2   1   2   0   1   1   4   2   1  19 6.31010     6218
   1   2   1   2   1  -1   0   2   1   1   2 5.88807     6219
   1   2   1   2   1  -1   0   2   1   1  10 6.48658     6220
   1   2   1   2   1  -1   0   2   1   1  11 6.50802     6221
   1   2   1   2   1  -1   0   2   1   1  12 5.56924     6222
   1   2   1   2   1  -1   0   2   1   1  13 4.31986     6223
   1   2   1   2   1  -1   0   2   1   1  14 4.21197     6224
   1   2   1   2   1  -1   0   2   1   1  15 5.41396     6225
   1   2   1   2   1  -1   0   2   1   1  17 5.97877     6226
   1   2   1   2   1  -1   0   2   1   1  18 3.73405     6227
   1   2   1   2   1  -1   0   2   1   1  19 3.51016     6228
   1   2   1   2   1  -1   0   2   1   1  21 5.22015     6229
   1   2   1   2   1  -1   0   2   2   1   2 5.88807     6230
   1   2   1   2   1  -1   0   2   2   1  10 6.48658     6231
   1   2   1   2   1  -1   0   2   2   1  11 6.50802     6232
   1   2   1   2   1  -1   0   2   2   1  12 5.56925     6233
   1   2   1   2   1  -1   0   2   2   1  13 4.31987     6234
   1   2   1   2   1  -1   0   2   2   1  14 4.21197     6235
   1   2   1   2   1  -1   0   2   2   1  15 5.41396     6236
   1   2   1   2   1  -1   0   2   2   1  17 5.97878     6237
   1   2   1   2   1  -1   0   2   2   1  18 3.73406     6238
   1   2   1   2   1  -1   0   2   2   1  19 3.51016     6239
   1   2   1   2   1  -1   0   2   2   1  21 5.24159     6240
   1   2   1   2   1  -1   0   2   2   1  26 5.74259     6241
   1   2   1   2   1  -1   0   2   2   1  27 5.39518     6242
   1   2   1   2   1  -1   0   2   2   1  28 4.37364     6243
   1   2   1   2   1  -1   1   3   1   1   7 6.76815     6244
   1   2   1   2   1  -1   1   3   1   1  24 6.42246     6245
   1   2   1   2   1  -1   1   3   1   1  25 5.95838     6246
   1   2   1   2   1  -1   1   3   1   1  27 6.12289     6247
   1   2   1   2   1  -1   1   3   1   1  28 6.96100     6248
   1   2   1   2   1  -1   1   3   2   1   7 6.76815     6249
   1   2   1   2   1  -1   1   3   2   1  24 6.42245     6250
   1   2   1   2   1  -1   1   3   2   1  25 5.95837     6251
   1   2   1   2   1   0   0   1   1   1   9 6.41736     6252
   1   2   1   2   1   0   0   1   1   1  10 6.00935     6253
   1   2   1   2   1   0   0   1   1   1  11 4.89619     6254
   1   2   1   2   1   0   0   1   1   1  12 5.01586     6255
   1   2   1   2   1   0   0   1   1   1  13 6.17665     6256
   1   2   1   2   1   0   0   1   1   1  16 4.24236     6257
   1   2   1   2   1   0   0   1   1   1  17 4.48925     6258
   1   2   1   2   1   0   0   1   1   1  18 6.55633     6259
   1   2   1   2   1   0   0   1   1   1  20 5.77513     6260
   1   2   1   2   1   0   0   1   1   1  26 4.92766     6261
   1   2   1   2   1   0   0   1   1   1  27 6.56007     6262
   1   2   1   2   1   0   0   1   1   1  28 5.84489     6263
   1   2   1   2   1   0   0   1   2   1   9 6.41736     6264
   1   2   1   2   1   0   0   1   2   1  10 6.00935     6265
   1   2   1   2   1   0   0   1   2   1  11 4.89619     6266
   1   2   1   2   1   0   0   1   2   1  12 5.01585     6267
   1   2   1   2   1   0   0   1   2   1  13 6.17664     6268
   1   2   1   2   1   0   0   1   2   1  16 4.24236     6269
   1   2   1   2   1   0   0   1   2   1  17 4.48925     6270
   1   2   1   2   1   0   0   1   2   1  18 6.55633     6271
   1   2   1   2   1   0   0   1   2   1  20 5.75117     6272
   1   2   1   2   1   0   0   2   1   1   2 5.88806     6273
   1   2   1   2   1   0   0   2   1   1   3 5.92578     6274
   1   2   1   2   1   0   0   2   1   1   4 6.79698     6275
   1   2   1   2   1   0   0   2   1   1   6 6.89489     6276
   1   2   1   2   1   0   0   2   1   1   7 6.06693     6277
   1   2   1   2   1   0   0   2   1   1   8 5.49975     6278
   1   2   1   2   1   0   0   2   1   1   9 5.02238     6279
   1   2   1   2   1   0   0   2   1   1  10 4.99804     6280
   1   2   1   2   1   0   0   2   1   1  11 5.10874     6281
   1   2   1   2   1   0   0   2   1   1  12 5.63033     6282
   1   2   1   2   1   0   0   2   1   1  13 6.04478     6283
   1   2   1   2   1   0   0   2   1   1  14 5.96980     6284
   1   2   1   2   1   0   0   2   1   1  15 5.46247     6285
   1   2   1   2   1   0   0   2   1   1  16 5.16498     6286
   1   2   1   2   1   0   0   2   1   1  17 6.05027     6287
   1   2   1   2   1   0   0   2   1   1  18 6.72488     6288
   1   2   1   2   1   0   0   2   1   1  19 6.59883     6289
   1   2   1   2   1   0   0   2   1   1  20 5.17456     6290
   1   2   1   2   1   0   0   2   1   1  21 6.93521     6291
   1   2   1   2   1   0   0   2   1   1  25 6.11938     6292
   1   2   1   2   1   0   0   2   1   1  26 5.17403     6293
   1   2   1   2   1   0   0   2   1   1  27 4.66267     6294
   1   2   1   2   1   0   0   2   1   1  28 6.15942     6295
   1   2   1   2   1   0   0   2   2   1   2 5.88807     6296
   1   2   1   2   1   0   0   2   2   1   3 5.92579     6297
   1   2   1   2   1   0   0   2   2   1   4 6.79699     6298
   1   2   1   2   1   0   0   2   2   1   6 6.89490     6299
   1   2   1   2   1   0   0   2   2   1   7 6.06694     6300
   1   2   1   2   1   0   0   2   2   1   8 5.49975     6301
   1   2   1   2   1   0   0   2   2   1   9 5.02238     6302
   1   2   1   2   1   0   0   2   2   1  10 4.99804     6303
   1   2   1   2   1   0   0   2   2   1  11 5.10874     6304
   1   2   1   2   1   0   0   2   2   1  12 5.63032     6305
   1   2   1   2   1   0   0   2   2   1  13 6.04478     6306
   1   2   1   2   1   0   0   2   2   1  14 5.96980     6307
   1   2   1   2   1   0   0   2   2   1  15 5.46248     6308
   1   2   1   2   1   0   0   2   2   1  16 5.16498     6309
   1   2   1   2   1   0   0   2   2   1  17 6.05027     6310
   1   2   1   2   1   0   0   2   2   1  18 6.72487     6311
   1   2   1   2   1   0   0   2   2   1  19 6.59884     6312
   1   2   1   2   1   0   0   2   2   1  20 5.22448     6313
   1   2   1   2   1   0   0   2   2   1  21 6.90344     6314
   1   2   1   2   1   0   0   2   2   1  25 6.11939     6315
   1   2   1   2   1   0   0   2   2   1  27 6.56037     6316
   1   2   1   2   1   0   0   3   1   1  18 6.86960     6317
   1   2   1   2   1   0   0   3   2   1  18 6.86961     6318
   1   2   1   2   1   0   1   3   1   1   2 4.24235     6319
   1   2   1   2   1   0   1   3   1   1   3 3.70221     6320
   1   2   1   2   1   0   1   3   1   1   4 4.09495     6321
   1   2   1   2   1   0   1   3   1   1   5 4.26896     6322
   1   2   1   2   1   0   1   3   1   1   6 4.09270     6323
   1   2   1   2   1   0   1   3   1   1   7 3.71794     6324
   1   2   1   2   1   0   1   3   1   1   8 3.49514     6325
   1   2   1   2   1   0   1   3   1   1   9 3.88761     6326
   1   2   1   2   1   0   1   3   1   1  10 4.40650     6327
   1   2   1   2   1   0   1   3   1   1  11 5.34763     6328
   1   2   1   2   1   0   1   3   1   1  12 6.19969     6329
   1   2   1   2   1   0   1   3   1   1  13 6.30974     6330
   1   2   1   2   1   0   1   3   1   1  14 5.60315     6331
   1   2   1   2   1   0   1   3   1   1  15 4.58112     6332
   1   2   1   2   1   0   1   3   1   1  16 5.64720     6333
   1   2   1   2   1   0   1   3   1   1  19 6.06890     6334
   1   2   1   2   1   0   1   3   1   1  20 4.57080     6335
   1   2   1   2   1   0   1   3   1   1  21 5.24896     6336
   1   2   1   2   1   0   1   3   1   1  22 4.71112     6337
   1   2   1   2   1   0   1   3   1   1  23 4.96658     6338
   1   2   1   2   1   0   1   3   1   1  24 4.70532     6339
   1   2   1   2   1   0   1   3   1   1  25 4.11580     6340
   1   2   1   2   1   0   1   3   1   1  26 5.18175     6341
   1   2   1   2   1   0   1   3   1   1  27 5.30745     6342
   1   2   1   2   1   0   1   3   1   1  28 4.00990     6343
   1   2   1   2   1   0   1   3   2   1   2 4.24234     6344
   1   2   1   2   1   0   1   3   2   1   3 3.70220     6345
   1   2   1   2   1   0   1   3   2   1   4 4.09494     6346
   1   2   1   2   1   0   1   3   2   1   5 4.26895     6347
   1   2   1   2   1   0   1   3   2   1   6 4.09270     6348
   1   2   1   2   1   0   1   3   2   1   7 3.71794     6349
   1   2   1   2   1   0   1   3   2   1   8 3.49514     6350
   1   2   1   2   1   0   1   3   2   1   9 3.88761     6351
   1   2   1   2   1   0   1   3   2   1  10 4.40650     6352
   1   2   1   2   1   0   1   3   2   1  11 5.34763     6353
   1   2   1   2   1   0   1   3   2   1  12 6.19968     6354
   1   2   1   2   1   0   1   3   2   1  13 6.30973     6355
   1   2   1   2   1   0   1   3   2   1  14 5.60314     6356
   1   2   1   2   1   0   1   3   2   1  15 4.58110     6357
   1   2   1   2   1   0   1   3   2   1  16 5.64720     6358
   1   2   1   2   1   0   1   3   2   1  19 6.06888     6359
   1   2   1   2   1   0   1   3   2   1  20 4.58906     6360
   1   2   1   2   1   0   1   3   2   1  21 5.17287     6361
   1   2   1   2   1   0   1   3   2   1  22 4.71110     6362
   1   2   1   2   1   0   1   3   2   1  23 4.96657     6363
   1   2   1   2   1   0   1   3   2   1  24 4.70532     6364
   1   2   1   2   1   0   1   3   2   1  25 4.11581     6365
   1   2   1   2   1   0   1   3   2   1  26 4.91896     6366
   1   2   1   2   1   0   1   3   2   1  27 5.97139     6367
   1   2   1   2   1   0   1   3   2   1  28 5.28561     6368
   1   2   1   2   1   0   1   4   1   1  17 6.63944     6369
   1   2   1   2   1   0   1   4   2   1  17 6.63945     6370
   1   2   1   2   2   0   1   3   1   1   3 6.93803     6371
   1   2   1   2   2   0   1   3   1   1   4 5.58550     6372
   1   2   1   2   2   0   1   3   1   1   5 5.47115     6373
   1   2   1   2   2   0   1   3   1   1   6 6.73671     6374
   1   2   1   2   2   0   1   3   1   1  21 6.68524     6375
   1   2   1   2   2   0   1   3   1   1  22 4.83536     6376
   1   2   1   2   2   0   1   3   1   1  23 4.59851     6377
   1   2   1   2   2   0   1   3   1   1  24 6.95801     6378
   1   2   1   2   2   0   1   3   2   1   3 6.93803     6379
   1   2   1   2   2   0   1   3   2   1   4 5.58550     6380
   1   2   1   2   2   0   1   3   2   1   5 5.47115     6381
   1   2   1   2   2   0   1   3   2   1   6 6.73671     6382
   1   2   1   2   2   0   1   3   2   1  21 6.69874     6383
   1   2   1   2   2   0   1   3   2   1  22 4.83536     6384
   1   2   1   2   2   0   1   3   2   1  23 4.59852     6385
   1   2   1   2   2   0   1   3   2   1  24 6.95802     6386
   1   2   1   2   2   0   1   3   2   1  26 5.79406     6387
   1   2   1   2   2   0   1   3   2   1  27 6.85539     6388
   1   2   1   3  -1   0   0   1   1   1  22 6.21643     6389
   1   2   1   3  -1   0   0   1   1   1  23 6.39014     6390
   1   2   1   3  -1   0   0   1   2   1  22 6.21643     6391
   1   2   1   3  -1   0   0   1   2   1  23 6.39014     6392
   1   2   1   3   0  -1   0   2   1   1  17 6.57595     6393
   1   2   1   3   0  -1   0   2   2   1  17 6.57595     6394
   1   2   1   3   0   0   0   4   1   1   4 6.78091     6395
   1   2   1   3   0   0   0   4   1   1   5 5.60420     6396
   1   2   1   3   0   0   0   4   1   1   6 4.75228     6397
   1   2   1   3   0   0   0   4   1   1   7 5.31893     6398
   1   2   1   3   0   0   0   4   1   1   8 6.58768     6399
   1   2   1   3   0   0   0   4   1   1  23 5.55636     6400
   1   2   1   3   0   0   0   4   1   1  24 3.91431     6401
   1   2   1   3   0   0   0   4   1   1  25 5.04531     6402
   1   2   1   3   0   0   0   4   1   1  28 6.43498     6403
   1   2   1   3   0   0   0   4   2   1   4 6.78090     6404
   1   2   1   3   0   0   0   4   2   1   5 5.60420     6405
   1   2   1   3   0   0   0   4   2   1   6 4.75228     6406
   1   2   1   3   0   0   0   4   2   1   7 5.31893     6407
   1   2   1   3   0   0   0   4   2   1   8 6.58768     6408
   1   2   1   3   0   0   0   4   2   1  23 5.55636     6409
   1   2   1   3   0   0   0   4   2   1  24 3.91430     6410
   1   2   1   3   0   0   0   4   2   1  25 5.04531     6411
   1   2   1   3   0   0   1   4   1   1   2 6.64463     6412
   1   2   1   3   0   0   1   4   1   1  10 6.67552     6413
   1   2   1   3   0   0   1   4   1   1  11 6.81523     6414
   1   2   1   3   0   0   1   4   1   1  12 6.65921     6415
   1   2   1   3   0   0   1   4   1   1  13 6.34791     6416
   1   2   1   3   0   0   1   4   1   1  14 6.18427     6417
   1   2   1   3   0   0   1   4   1   1  15 6.34458     6418
   1   2   1   3   0   0   1   4   1   1  18 6.55626     6419
   1   2   1   3   0   0   1   4   1   1  19 6.26284     6420
   1   2   1   3   0   0   1   4   1   1  21 6.82902     6421
   1   2   1   3   0   0   1   4   2   1   2 6.64463     6422
   1   2   1   3   0   0   1   4   2   1  10 6.67553     6423
   1   2   1   3   0   0   1   4   2   1  11 6.81525     6424
   1   2   1   3   0   0   1   4   2   1  12 6.65923     6425
   1   2   1   3   0   0   1   4   2   1  13 6.34792     6426
   1   2   1   3   0   0   1   4   2   1  14 6.18428     6427
   1   2   1   3   0   0   1   4   2   1  15 6.34459     6428
   1   2   1   3   0   0   1   4   2   1  18 6.55627     6429
   1   2   1   3   0   0   1   4   2   1  19 6.26284     6430
   1   2   1   3   0   0   1   4   2   1  21 6.84111     6431
   1   2   1   3   0   0   1   4   2   1  27 6.14713     6432
   1   2   1   3   0   1   1   4   1   1  18 6.55189     6433
   1   2   1   3   0   1   1   4   1   1  19 6.26284     6434
   1   2   1   3   0   1   1   4   2   1  18 6.55190     6435
   1   2   1   3   0   1   1   4   2   1  19 6.26284     6436
   1   2   1   3   0   1   1   4   2   1  28 6.85046     6437
   1   2   1   3   1  -1   0   2   1   1   2 5.92579     6438
   1   2   1   3   1  -1   0   2   1   1  10 6.27898     6439
   1   2   1   3   1  -1   0   2   1   1  11 6.13526     6440
   1   2   1   3   1  -1   0   2   1   1  12 5.04340     6441
   1   2   1   3   1  -1   0   2   1   1  13 3.76633     6442
   1   2   1   3   1  -1   0   2   1   1  14 3.89948     6443
   1   2   1   3   1  -1   0   2   1   1  15 5.26716     6444
   1   2   1   3   1  -1   0   2   1   1  17 5.34773     6445
   1   2   1   3   1  -1   0   2   1   1  18 2.96125     6446
   1   2   1   3   1  -1   0   2   1   1  19 3.25581     6447
   1   2   1   3   1  -1   0   2   1   1  21 5.38417     6448
   1   2   1   3   1  -1   0   2   2   1   2 5.92579     6449
   1   2   1   3   1  -1   0   2   2   1  10 6.27898     6450
[truncated: 2,658,685 more chars]
