# Supplementary material for: A Process for Modelling Diffuse Scattering from Disordered Molecular Crystals, Illustrated by Application to Monoclinic 9-Chloro-10-methylanthracene
Source: Hindawi journal article supplement (doi:10.1155/2015/878463), 2015-01-01
Supplement: f2 [file 878463.f2.zip › 878463.f2/CMA_simulations/CMA_force_const_Chan]

 Trimmed
 SPRCON    3.52888203               2
 SPRCON    3.52888203               3
 SPRCON    3.52888203               4
 SPRCON    3.46541691               6
 SPRCON    3.46541691               7
 SPRCON    3.07771301               9
 SPRCON    3.07771301              10
 SPRCON    3.07771301              11
 SPRCON    3.07771301              12
 SPRCON    2.89272690              14
 SPRCON    2.89272690              15
 SPRCON    2.89229202              16
 SPRCON    2.55812073              17
 SPRCON    2.55812073              18
 SPRCON    2.55812073              19
 SPRCON    2.55812073              20
 SPRCON    2.51849747              21
 SPRCON    2.51849747              22
 SPRCON    2.51849747              23
 SPRCON    2.14291477              25
 SPRCON    2.12872314              26
 SPRCON    2.12872314              27
 SPRCON    2.12872314              28
 SPRCON    2.01831913              29
 SPRCON    2.01831913              30
 SPRCON    2.01831913              31
 SPRCON    1.92895603              33
 SPRCON    1.92895603              34
 SPRCON    1.92895603              35
 SPRCON    1.84511471              37
 SPRCON    1.84511471              38
 SPRCON    1.84511471              39
 SPRCON    1.84511471              40
 SPRCON    1.80424309              42
 SPRCON    1.80424309              43
 SPRCON    3.53349400              45
 SPRCON    3.53349400              46
 SPRCON    3.53349400              47
 SPRCON    3.53349400              48
 SPRCON    3.30059338              49
 SPRCON    3.30059338              50
 SPRCON    3.30059338              51
 SPRCON    3.30059338              52
 SPRCON    1.21594620              53
 SPRCON    1.21594620              54
 SPRCON    1.21594620              55
 SPRCON    1.21594620              56
 SPRCON    3.13769436              57
 SPRCON    3.13769436              58
 SPRCON    3.13769436              59
 SPRCON    3.13769436              60
 SPRCON    1.07547092              62
 SPRCON    1.07547092              63
 SPRCON    1.07547092              64
 SPRCON    3.01100540              65
 SPRCON    3.01100540              66
 SPRCON    3.01100540              67
 SPRCON    3.01100540              68
 SPRCON    2.79426861              69
 SPRCON    2.79426861              70
 SPRCON    2.79426861              71
 SPRCON    2.79426861              72
 SPRCON    2.76494884              73
 SPRCON    2.76494884              74
 SPRCON    2.76494884              75
 SPRCON    2.73356056              77
 SPRCON    2.73356056              78
 SPRCON    2.73356056              79
 SPRCON    2.73356056              80
 SPRCON    2.90580559              81
 SPRCON    2.90580559              82
 SPRCON    2.90580559              83
 SPRCON    2.62420940              86
 SPRCON    2.62420940              87
 SPRCON    2.62420940              88
 SPRCON    2.55009937              90
 SPRCON    2.55009937              91
 SPRCON    2.55009937              92
 SPRCON    2.73012638              94
 SPRCON    2.73012638              95
 SPRCON    2.73012638              96
 SPRCON    2.39801884              97
 SPRCON    2.39801884              98
 SPRCON    2.39801884              99
 SPRCON    2.39801884             100
 SPRCON    2.54334927             101
 SPRCON   0.453118324             102
 SPRCON   0.453118324             103
 SPRCON    2.53786850             104
 SPRCON    2.29785252             105
 SPRCON    2.29785252             106
 SPRCON    2.29785252             107
 SPRCON   0.436903000             108
 SPRCON   0.402215004             109
 SPRCON   0.402215004             110
 SPRCON   0.402215004             111
 SPRCON    2.26495075             112
 SPRCON    2.45557499             113
 SPRCON    2.45557499             114
 SPRCON    2.45557499             115
 SPRCON   0.368673325             118
 SPRCON   0.368673325             119
 SPRCON   0.368673325             120
 SPRCON    2.17623711             121
 SPRCON    2.17623711             122
 SPRCON    2.17623711             123
 SPRCON    2.17623711             124
 SPRCON   0.300330162             125
 SPRCON   0.300330162             126
 SPRCON   0.300330162             127
 SPRCON   0.300330162             128
 SPRCON   0.264219284             129
 SPRCON   0.264219284             130
 SPRCON   0.264219284             131
 SPRCON    2.05163479             133
 SPRCON    2.03195286             134
 SPRCON    2.03195286             135
 SPRCON    2.03155231             136
 SPRCON    2.01311111             137
 SPRCON    2.01311111             138
 SPRCON    2.01311111             139
 SPRCON    1.95162010             141
 SPRCON    1.95162010             142
 SPRCON    1.95162010             143
 SPRCON    1.95162010             144
 SPRCON    1.92657280             145
 SPRCON    1.92657280             146
 SPRCON    1.92657280             147
 SPRCON    1.92657280             148
 SPRCON    9.18331146E-02         149
 SPRCON    1.87864399             150
 SPRCON    1.87864399             151
 SPRCON    1.87864399             152
 SPRCON    1.84235859             153
 SPRCON    5.34067154E-02         154
 SPRCON    5.34067154E-02         155
 SPRCON    5.34067154E-02         156
 SPRCON    4.60023880E-02         157
 SPRCON    4.56800461E-02         158
 SPRCON    4.56800461E-02         159
 SPRCON    1.79836369             162
 SPRCON    1.79836369             163
 SPRCON    1.79836369             164
 SPRCON    1.65441418             177
 SPRCON    1.65441418             178
 SPRCON    1.65441418             179
 SPRCON    1.65441418             180
 SPRCON    1.45832539             189
 SPRCON    1.45832539             190
 SPRCON    1.45832539             191
 SPRCON    1.30558968             193
 SPRCON    1.30558968             194
 SPRCON    1.30558968             195
 SPRCON    1.30558968             196
 SPRCON    1.29480171             197
 SPRCON    1.29480171             198
 SPRCON    1.29480171             199
 SPRCON    1.26547623             201
 SPRCON    1.26547623             202
 SPRCON    1.26547623             203
 SPRCON    1.26547623             204
 SPRCON    1.16998196             209
 SPRCON    1.16998196             210
 SPRCON    1.16998196             211
 SPRCON    1.16998196             212
 SPRCON    1.27585983             218
 SPRCON    1.27585983             219
 SPRCON    1.27585983             220
 SPRCON   0.941785812             225
 SPRCON   0.941785812             226
 SPRCON   0.941785812             227
 SPRCON   0.941785812             228
 SPRCON   0.903595924             229
 SPRCON   0.903595924             230
 SPRCON   0.903595924             231
 SPRCON   0.907158852             232
 SPRCON   0.867698669             233
 SPRCON   0.867698669             234
 SPRCON   0.867698669             235
 SPRCON    2.70697403             245
 SPRCON   0.766129494             246
 SPRCON   0.766129494             247
 SPRCON   0.766129494             248
 SPRCON   0.752815247             250
 SPRCON   0.752815247             251
 SPRCON   0.912504196             252
 SPRCON    2.62590885             257
 SPRCON   0.690367699             258
 SPRCON   0.690367699             259
 SPRCON   0.690715790             260
 SPRCON   0.666762352             261
 SPRCON   0.666762352             262
 SPRCON   0.666762352             263
 SPRCON    2.58941841             264
 SPRCON   0.643566132             265
 SPRCON   0.643566132             266
 SPRCON   0.643566132             267
 SPRCON   0.643566132             268
 SPRCON   0.633891106             269
 SPRCON   0.633891106             270
 SPRCON   0.633891106             271
 SPRCON   0.617674828             276
 SPRCON   0.522377014             281
 SPRCON   0.522036552             282
 SPRCON   0.522036552             283
 SPRCON   0.522036552             284
 SPRCON   0.478853226             285
 SPRCON   0.478853226             286
 SPRCON   0.478853226             287
 SPRCON   0.478853226             288
 SPRCON    2.55263138             289
 SPRCON    2.55263138             290
 SPRCON    2.55263138             291
 SPRCON   0.405911446             293
 SPRCON   0.405911446             294
 SPRCON   0.405911446             295
 SPRCON   0.405911446             296
 SPRCON   0.373695374             297
 SPRCON   0.366664886             298
 SPRCON   0.366664886             299
 SPRCON   0.366664886             300
 SPRCON   0.357968330             301
 SPRCON   0.351617813             302
 SPRCON   0.351617813             303
 SPRCON   0.351617813             304
 SPRCON   0.509092331             306
 SPRCON   0.509092331             307
 SPRCON   0.509092331             308
 SPRCON   0.319942474             310
 SPRCON   0.319942474             311
 SPRCON   0.302654266             313
 SPRCON   0.302654266             314
 SPRCON   0.302654266             315
 SPRCON   0.302654266             316
 SPRCON   0.262897491             318
 SPRCON   0.262897491             319
 SPRCON   0.262897491             320
 SPRCON    2.05766773             321
 SPRCON    2.05766773             322
 SPRCON    2.05766773             323
 SPRCON    2.05766773             324
 SPRCON   0.198369026             325
 SPRCON   0.198369026             326
 SPRCON   0.198369026             327
 SPRCON   0.198369026             328
 SPRCON   0.174465179             329
 SPRCON   0.174465179             330
 SPRCON   0.174465179             331
 SPRCON   0.174465179             332
 SPRCON   0.174465179             333
 SPRCON    1.92895603             337
 SPRCON    1.92895603             338
 SPRCON    1.92895603             339
 SPRCON    1.92895603             340
 SPRCON   0.105439186             341
 SPRCON   0.105439186             342
 SPRCON   0.105439186             343
 SPRCON   0.105439186             344
 SPRCON    1.86008930             345
 SPRCON    1.86008930             346
 SPRCON    1.86008930             347
 SPRCON    1.86008930             348
 SPRCON    1.82858849             349
 SPRCON    1.82858849             350
 SPRCON    1.82858849             351
 SPRCON    1.82858849             352
 SPRCON    1.81680107             353
 SPRCON   0.198698044             354
 SPRCON   0.198698044             355
 SPRCON   0.198698044             356
 SPRCON    1.77213860             357
 SPRCON    1.77213860             358
 SPRCON    1.77213860             359
 SPRCON    1.77213860             360
 SPRCON    1.74754333             361
 SPRCON    1.74754333             362
 SPRCON    1.74754333             363
 SPRCON    1.74754333             364
 SPRCON    1.88022518             373
 SPRCON    1.65132523             377
 SPRCON    1.65132523             378
 SPRCON    1.65132523             379
 SPRCON    1.65132523             380
 SPRCON    1.59551048             385
 SPRCON    1.59551048             386
 SPRCON    1.59551048             387
 SPRCON    1.59551048             388
 SPRCON    1.54688835             396
 SPRCON    1.43602943             409
 SPRCON    1.43602943             410
 SPRCON    1.43602943             411
 SPRCON    1.43640709             412
 SPRCON    1.39873695             418
 SPRCON    1.39873695             419
 SPRCON    1.39873695             420
 SPRCON    1.34961605             425
 SPRCON    1.32235527             429
 SPRCON    1.32235527             430
 SPRCON    1.32235527             431
 SPRCON    1.32235527             432
 SPRCON    1.30000782             433
 SPRCON    1.47347069             434
 SPRCON    1.47347069             435
 SPRCON    1.47347069             436
 SPRCON    1.26214218             437
 SPRCON    1.25769711             438
 SPRCON    1.25769711             439
 SPRCON    1.25769711             440
 SPRCON    1.14909840             453
 SPRCON    1.14909840             454
 SPRCON    1.14909840             455
 SPRCON    1.14946365             456
 SPRCON    1.10638046             457
 SPRCON    1.10638046             458
 SPRCON    1.10638046             459
 SPRCON    1.27289200             461
 SPRCON    1.27289200             462
 SPRCON    1.27289200             463
 SPRCON    1.27474689             464
 SPRCON    1.07111645             465
 SPRCON    1.07111645             466
 SPRCON    1.07111645             467
 SPRCON    1.07111645             468
 SPRCON   0.944289207             489
 SPRCON   0.944289207             490
 SPRCON   0.944289207             491
 SPRCON   0.944289207             492
 SPRCON    1.04792309             497
 SPRCON    1.04792309             498
 SPRCON    1.04792309             499
 SPRCON   0.928204536             513
 SPRCON   0.938924789             514
 SPRCON   0.938924789             515
 SPRCON   0.917853355             520
 SPRCON   0.711598396             521
 SPRCON   0.677515984             528
 SPRCON   0.636309624             529
 SPRCON   0.636309624             530
 SPRCON   0.636309624             531
 SPRCON   0.636309624             532
 SPRCON   0.615262032             533
 SPRCON   0.611127853             534
 SPRCON   0.611127853             535
 SPRCON   0.611127853             536
 SPRCON   0.591859818             537
 SPRCON   0.931062698             538
 SPRCON   0.931062698             539
 SPRCON   0.591859818             540
 SPRCON   0.691062927             549
 SPRCON   0.683765411             550
 SPRCON   0.683765411             551
 SPRCON   0.683765411             552
 SPRCON   0.376375198             565
 SPRCON   0.376375198             566
 SPRCON   0.376375198             567
 SPRCON   0.337932587             569
 SPRCON   0.337932587             570
 SPRCON   0.337932587             571
 SPRCON   0.337932587             572
 SPRCON   0.311627388             578
 SPRCON   0.311627388             579
 SPRCON   0.311627388             580
 SPRCON   0.289381981             581
 SPRCON   0.289381981             582
 SPRCON   0.289381981             583
 SPRCON   0.289381981             584
 SPRCON   0.258271217             585
 SPRCON   0.258271217             586
 SPRCON   0.258271217             587
 SPRCON   0.258271217             588
 SPRCON   0.389787674             589
 SPRCON   0.389787674             590
 SPRCON   0.389787674             591
 SPRCON   0.229582787             592
 SPRCON   0.161396027             601
 SPRCON   0.161396027             602
 SPRCON   0.161396027             603
 SPRCON   0.161396027             604
 Untrimmed
 SPRCON    0.00000000               1
 SPRCON    3.52888203               2
 SPRCON    3.52888203               3
 SPRCON    3.52888203               4
 SPRCON    0.00000000               5
 SPRCON    3.46541691               6
 SPRCON    3.46541691               7
 SPRCON    0.00000000               8
 SPRCON    3.07771301               9
 SPRCON    3.07771301              10
 SPRCON    3.07771301              11
 SPRCON    3.07771301              12
 SPRCON    0.00000000              13
 SPRCON    2.89272690              14
 SPRCON    2.89272690              15
 SPRCON    2.89229202              16
 SPRCON    2.55812073              17
 SPRCON    2.55812073              18
 SPRCON    2.55812073              19
 SPRCON    2.55812073              20
 SPRCON    2.51849747              21
 SPRCON    2.51849747              22
 SPRCON    2.51849747              23
 SPRCON    0.00000000              24
 SPRCON    2.14291477              25
 SPRCON    2.12872314              26
 SPRCON    2.12872314              27
 SPRCON    2.12872314              28
 SPRCON    2.01831913              29
 SPRCON    2.01831913              30
 SPRCON    2.01831913              31
 SPRCON    0.00000000              32
 SPRCON    1.92895603              33
 SPRCON    1.92895603              34
 SPRCON    1.92895603              35
 SPRCON    0.00000000              36
 SPRCON    1.84511471              37
 SPRCON    1.84511471              38
 SPRCON    1.84511471              39
 SPRCON    1.84511471              40
 SPRCON    0.00000000              41
 SPRCON    1.80424309              42
 SPRCON    1.80424309              43
 SPRCON    0.00000000              44
 SPRCON    3.53349400              45
 SPRCON    3.53349400              46
 SPRCON    3.53349400              47
 SPRCON    3.53349400              48
 SPRCON    3.30059338              49
 SPRCON    3.30059338              50
 SPRCON    3.30059338              51
 SPRCON    3.30059338              52
 SPRCON    1.21594620              53
 SPRCON    1.21594620              54
 SPRCON    1.21594620              55
 SPRCON    1.21594620              56
 SPRCON    3.13769436              57
 SPRCON    3.13769436              58
 SPRCON    3.13769436              59
 SPRCON    3.13769436              60
 SPRCON    0.00000000              61
 SPRCON    1.07547092              62
 SPRCON    1.07547092              63
 SPRCON    1.07547092              64
 SPRCON    3.01100540              65
 SPRCON    3.01100540              66
 SPRCON    3.01100540              67
 SPRCON    3.01100540              68
 SPRCON    2.79426861              69
 SPRCON    2.79426861              70
 SPRCON    2.79426861              71
 SPRCON    2.79426861              72
 SPRCON    2.76494884              73
 SPRCON    2.76494884              74
 SPRCON    2.76494884              75
 SPRCON    0.00000000              76
 SPRCON    2.73356056              77
 SPRCON    2.73356056              78
 SPRCON    2.73356056              79
 SPRCON    2.73356056              80
 SPRCON    2.90580559              81
 SPRCON    2.90580559              82
 SPRCON    2.90580559              83
 SPRCON    0.00000000              84
 SPRCON    0.00000000              85
 SPRCON    2.62420940              86
 SPRCON    2.62420940              87
 SPRCON    2.62420940              88
 SPRCON    0.00000000              89
 SPRCON    2.55009937              90
 SPRCON    2.55009937              91
 SPRCON    2.55009937              92
 SPRCON    0.00000000              93
 SPRCON    2.73012638              94
 SPRCON    2.73012638              95
 SPRCON    2.73012638              96
 SPRCON    2.39801884              97
 SPRCON    2.39801884              98
 SPRCON    2.39801884              99
 SPRCON    2.39801884             100
 SPRCON    2.54334927             101
 SPRCON   0.453118324             102
 SPRCON   0.453118324             103
 SPRCON    2.53786850             104
 SPRCON    2.29785252             105
 SPRCON    2.29785252             106
 SPRCON    2.29785252             107
 SPRCON   0.436903000             108
 SPRCON   0.402215004             109
 SPRCON   0.402215004             110
 SPRCON   0.402215004             111
 SPRCON    2.26495075             112
 SPRCON    2.45557499             113
 SPRCON    2.45557499             114
 SPRCON    2.45557499             115
 SPRCON    0.00000000             116
 SPRCON    0.00000000             117
 SPRCON   0.368673325             118
 SPRCON   0.368673325             119
 SPRCON   0.368673325             120
 SPRCON    2.17623711             121
 SPRCON    2.17623711             122
 SPRCON    2.17623711             123
 SPRCON    2.17623711             124
 SPRCON   0.300330162             125
 SPRCON   0.300330162             126
 SPRCON   0.300330162             127
 SPRCON   0.300330162             128
 SPRCON   0.264219284             129
 SPRCON   0.264219284             130
 SPRCON   0.264219284             131
 SPRCON    0.00000000             132
 SPRCON    2.05163479             133
 SPRCON    2.03195286             134
 SPRCON    2.03195286             135
 SPRCON    2.03155231             136
 SPRCON    2.01311111             137
 SPRCON    2.01311111             138
 SPRCON    2.01311111             139
 SPRCON    0.00000000             140
 SPRCON    1.95162010             141
 SPRCON    1.95162010             142
 SPRCON    1.95162010             143
 SPRCON    1.95162010             144
 SPRCON    1.92657280             145
 SPRCON    1.92657280             146
 SPRCON    1.92657280             147
 SPRCON    1.92657280             148
 SPRCON    9.18331146E-02         149
 SPRCON    1.87864399             150
 SPRCON    1.87864399             151
 SPRCON    1.87864399             152
 SPRCON    1.84235859             153
 SPRCON    5.34067154E-02         154
 SPRCON    5.34067154E-02         155
 SPRCON    5.34067154E-02         156
 SPRCON    4.60023880E-02         157
 SPRCON    4.56800461E-02         158
 SPRCON    4.56800461E-02         159
 SPRCON    0.00000000             160
 SPRCON    0.00000000             161
 SPRCON    1.79836369             162
 SPRCON    1.79836369             163
 SPRCON    1.79836369             164
 SPRCON    0.00000000             165
 SPRCON    0.00000000             166
 SPRCON    0.00000000             167
 SPRCON    0.00000000             168
 SPRCON    0.00000000             169
 SPRCON    0.00000000             170
 SPRCON    0.00000000             171
 SPRCON    0.00000000             172
 SPRCON    0.00000000             173
 SPRCON    0.00000000             174
 SPRCON    0.00000000             175
 SPRCON    0.00000000             176
 SPRCON    1.65441418             177
 SPRCON    1.65441418             178
 SPRCON    1.65441418             179
 SPRCON    1.65441418             180
 SPRCON    0.00000000             181
 SPRCON    0.00000000             182
 SPRCON    0.00000000             183
 SPRCON    0.00000000             184
 SPRCON    0.00000000             185
 SPRCON    0.00000000             186
 SPRCON    0.00000000             187
 SPRCON    0.00000000             188
 SPRCON    1.45832539             189
 SPRCON    1.45832539             190
 SPRCON    1.45832539             191
 SPRCON    0.00000000             192
 SPRCON    1.30558968             193
 SPRCON    1.30558968             194
 SPRCON    1.30558968             195
 SPRCON    1.30558968             196
 SPRCON    1.29480171             197
 SPRCON    1.29480171             198
 SPRCON    1.29480171             199
 SPRCON    0.00000000             200
 SPRCON    1.26547623             201
 SPRCON    1.26547623             202
 SPRCON    1.26547623             203
 SPRCON    1.26547623             204
 SPRCON    0.00000000             205
 SPRCON    0.00000000             206
 SPRCON    0.00000000             207
 SPRCON    0.00000000             208
 SPRCON    1.16998196             209
 SPRCON    1.16998196             210
 SPRCON    1.16998196             211
 SPRCON    1.16998196             212
 SPRCON    0.00000000             213
 SPRCON    0.00000000             214
 SPRCON    0.00000000             215
 SPRCON    0.00000000             216
 SPRCON    0.00000000             217
 SPRCON    1.27585983             218
 SPRCON    1.27585983             219
 SPRCON    1.27585983             220
 SPRCON    0.00000000             221
 SPRCON    0.00000000             222
 SPRCON    0.00000000             223
 SPRCON    0.00000000             224
 SPRCON   0.941785812             225
 SPRCON   0.941785812             226
 SPRCON   0.941785812             227
 SPRCON   0.941785812             228
 SPRCON   0.903595924             229
 SPRCON   0.903595924             230
 SPRCON   0.903595924             231
 SPRCON   0.907158852             232
 SPRCON   0.867698669             233
 SPRCON   0.867698669             234
 SPRCON   0.867698669             235
 SPRCON    0.00000000             236
 SPRCON    0.00000000             237
 SPRCON    0.00000000             238
 SPRCON    0.00000000             239
 SPRCON    0.00000000             240
 SPRCON    0.00000000             241
 SPRCON    0.00000000             242
 SPRCON    0.00000000             243
 SPRCON    0.00000000             244
 SPRCON    2.70697403             245
 SPRCON   0.766129494             246
 SPRCON   0.766129494             247
 SPRCON   0.766129494             248
 SPRCON    0.00000000             249
 SPRCON   0.752815247             250
 SPRCON   0.752815247             251
 SPRCON   0.912504196             252
 SPRCON    0.00000000             253
 SPRCON    0.00000000             254
 SPRCON    0.00000000             255
 SPRCON    0.00000000             256
 SPRCON    2.62590885             257
 SPRCON   0.690367699             258
 SPRCON   0.690367699             259
 SPRCON   0.690715790             260
 SPRCON   0.666762352             261
 SPRCON   0.666762352             262
 SPRCON   0.666762352             263
 SPRCON    2.58941841             264
 SPRCON   0.643566132             265
 SPRCON   0.643566132             266
 SPRCON   0.643566132             267
 SPRCON   0.643566132             268
 SPRCON   0.633891106             269
 SPRCON   0.633891106             270
 SPRCON   0.633891106             271
 SPRCON    0.00000000             272
 SPRCON    0.00000000             273
 SPRCON    0.00000000             274
 SPRCON    0.00000000             275
 SPRCON   0.617674828             276
 SPRCON    0.00000000             277
 SPRCON    0.00000000             278
 SPRCON    0.00000000             279
 SPRCON    0.00000000             280
 SPRCON   0.522377014             281
 SPRCON   0.522036552             282
 SPRCON   0.522036552             283
 SPRCON   0.522036552             284
 SPRCON   0.478853226             285
 SPRCON   0.478853226             286
 SPRCON   0.478853226             287
 SPRCON   0.478853226             288
 SPRCON    2.55263138             289
 SPRCON    2.55263138             290
 SPRCON    2.55263138             291
 SPRCON    0.00000000             292
 SPRCON   0.405911446             293
 SPRCON   0.405911446             294
 SPRCON   0.405911446             295
 SPRCON   0.405911446             296
 SPRCON   0.373695374             297
 SPRCON   0.366664886             298
 SPRCON   0.366664886             299
 SPRCON   0.366664886             300
 SPRCON   0.357968330             301
 SPRCON   0.351617813             302
 SPRCON   0.351617813             303
 SPRCON   0.351617813             304
 SPRCON    0.00000000             305
 SPRCON   0.509092331             306
 SPRCON   0.509092331             307
 SPRCON   0.509092331             308
 SPRCON    0.00000000             309
 SPRCON   0.319942474             310
 SPRCON   0.319942474             311
 SPRCON    0.00000000             312
 SPRCON   0.302654266             313
 SPRCON   0.302654266             314
 SPRCON   0.302654266             315
 SPRCON   0.302654266             316
 SPRCON    0.00000000             317
 SPRCON   0.262897491             318
 SPRCON   0.262897491             319
 SPRCON   0.262897491             320
 SPRCON    2.05766773             321
 SPRCON    2.05766773             322
 SPRCON    2.05766773             323
 SPRCON    2.05766773             324
 SPRCON   0.198369026             325
 SPRCON   0.198369026             326
 SPRCON   0.198369026             327
 SPRCON   0.198369026             328
 SPRCON   0.174465179             329
 SPRCON   0.174465179             330
 SPRCON   0.174465179             331
 SPRCON   0.174465179             332
 SPRCON   0.174465179             333
 SPRCON    0.00000000             334
 SPRCON    0.00000000             335
 SPRCON    0.00000000             336
 SPRCON    1.92895603             337
 SPRCON    1.92895603             338
 SPRCON    1.92895603             339
 SPRCON    1.92895603             340
 SPRCON   0.105439186             341
 SPRCON   0.105439186             342
 SPRCON   0.105439186             343
 SPRCON   0.105439186             344
 SPRCON    1.86008930             345
 SPRCON    1.86008930             346
 SPRCON    1.86008930             347
 SPRCON    1.86008930             348
 SPRCON    1.82858849             349
 SPRCON    1.82858849             350
 SPRCON    1.82858849             351
 SPRCON    1.82858849             352
 SPRCON    1.81680107             353
 SPRCON   0.198698044             354
 SPRCON   0.198698044             355
 SPRCON   0.198698044             356
 SPRCON    1.77213860             357
 SPRCON    1.77213860             358
 SPRCON    1.77213860             359
 SPRCON    1.77213860             360
 SPRCON    1.74754333             361
 SPRCON    1.74754333             362
 SPRCON    1.74754333             363
 SPRCON    1.74754333             364
 SPRCON    0.00000000             365
 SPRCON    0.00000000             366
 SPRCON    0.00000000             367
 SPRCON    0.00000000             368
 SPRCON    0.00000000             369
 SPRCON    0.00000000             370
 SPRCON    0.00000000             371
 SPRCON    0.00000000             372
 SPRCON    1.88022518             373
 SPRCON    0.00000000             374
 SPRCON    0.00000000             375
 SPRCON    0.00000000             376
 SPRCON    1.65132523             377
 SPRCON    1.65132523             378
 SPRCON    1.65132523             379
 SPRCON    1.65132523             380
 SPRCON    0.00000000             381
 SPRCON    0.00000000             382
 SPRCON    0.00000000             383
 SPRCON    0.00000000             384
 SPRCON    1.59551048             385
 SPRCON    1.59551048             386
 SPRCON    1.59551048             387
 SPRCON    1.59551048             388
 SPRCON    0.00000000             389
 SPRCON    0.00000000             390
 SPRCON    0.00000000             391
 SPRCON    0.00000000             392
 SPRCON    0.00000000             393
 SPRCON    0.00000000             394
 SPRCON    0.00000000             395
 SPRCON    1.54688835             396
 SPRCON    0.00000000             397
 SPRCON    0.00000000             398
 SPRCON    0.00000000             399
 SPRCON    0.00000000             400
 SPRCON    0.00000000             401
 SPRCON    0.00000000             402
 SPRCON    0.00000000             403
 SPRCON    0.00000000             404
 SPRCON    0.00000000             405
 SPRCON    0.00000000             406
 SPRCON    0.00000000             407
 SPRCON    0.00000000             408
 SPRCON    1.43602943             409
 SPRCON    1.43602943             410
 SPRCON    1.43602943             411
 SPRCON    1.43640709             412
 SPRCON    0.00000000             413
 SPRCON    0.00000000             414
 SPRCON    0.00000000             415
 SPRCON    0.00000000             416
 SPRCON    0.00000000             417
 SPRCON    1.39873695             418
 SPRCON    1.39873695             419
 SPRCON    1.39873695             420
 SPRCON    0.00000000             421
 SPRCON    0.00000000             422
 SPRCON    0.00000000             423
 SPRCON    0.00000000             424
 SPRCON    1.34961605             425
 SPRCON    0.00000000             426
 SPRCON    0.00000000             427
 SPRCON    0.00000000             428
 SPRCON    1.32235527             429
 SPRCON    1.32235527             430
 SPRCON    1.32235527             431
 SPRCON    1.32235527             432
 SPRCON    1.30000782             433
 SPRCON    1.47347069             434
 SPRCON    1.47347069             435
 SPRCON    1.47347069             436
 SPRCON    1.26214218             437
 SPRCON    1.25769711             438
 SPRCON    1.25769711             439
 SPRCON    1.25769711             440
 SPRCON    0.00000000             441
 SPRCON    0.00000000             442
 SPRCON    0.00000000             443
 SPRCON    0.00000000             444
 SPRCON    0.00000000             445
 SPRCON    0.00000000             446
 SPRCON    0.00000000             447
 SPRCON    0.00000000             448
 SPRCON    0.00000000             449
 SPRCON    0.00000000             450
 SPRCON    0.00000000             451
 SPRCON    0.00000000             452
 SPRCON    1.14909840             453
 SPRCON    1.14909840             454
 SPRCON    1.14909840             455
 SPRCON    1.14946365             456
 SPRCON    1.10638046             457
 SPRCON    1.10638046             458
 SPRCON    1.10638046             459
 SPRCON    0.00000000             460
 SPRCON    1.27289200             461
 SPRCON    1.27289200             462
 SPRCON    1.27289200             463
 SPRCON    1.27474689             464
 SPRCON    1.07111645             465
 SPRCON    1.07111645             466
 SPRCON    1.07111645             467
 SPRCON    1.07111645             468
 SPRCON    0.00000000             469
 SPRCON    0.00000000             470
 SPRCON    0.00000000             471
 SPRCON    0.00000000             472
 SPRCON    0.00000000             473
 SPRCON    0.00000000             474
 SPRCON    0.00000000             475
 SPRCON    0.00000000             476
 SPRCON    0.00000000             477
 SPRCON    0.00000000             478
 SPRCON    0.00000000             479
 SPRCON    0.00000000             480
 SPRCON    0.00000000             481
 SPRCON    0.00000000             482
 SPRCON    0.00000000             483
 SPRCON    0.00000000             484
 SPRCON    0.00000000             485
 SPRCON    0.00000000             486
 SPRCON    0.00000000             487
 SPRCON    0.00000000             488
 SPRCON   0.944289207             489
 SPRCON   0.944289207             490
 SPRCON   0.944289207             491
 SPRCON   0.944289207             492
 SPRCON    0.00000000             493
 SPRCON    0.00000000             494
 SPRCON    0.00000000             495
 SPRCON    0.00000000             496
 SPRCON    1.04792309             497
 SPRCON    1.04792309             498
 SPRCON    1.04792309             499
 SPRCON    0.00000000             500
 SPRCON    0.00000000             501
 SPRCON    0.00000000             502
 SPRCON    0.00000000             503
 SPRCON    0.00000000             504
 SPRCON    0.00000000             505
 SPRCON    0.00000000             506
 SPRCON    0.00000000             507
 SPRCON    0.00000000             508
 SPRCON    0.00000000             509
 SPRCON    0.00000000             510
 SPRCON    0.00000000             511
 SPRCON    0.00000000             512
 SPRCON   0.928204536             513
 SPRCON   0.938924789             514
 SPRCON   0.938924789             515
 SPRCON    0.00000000             516
 SPRCON    0.00000000             517
 SPRCON    0.00000000             518
 SPRCON    0.00000000             519
 SPRCON   0.917853355             520
 SPRCON   0.711598396             521
 SPRCON    0.00000000             522
 SPRCON    0.00000000             523
 SPRCON    0.00000000             524
 SPRCON    0.00000000             525
 SPRCON    0.00000000             526
 SPRCON    0.00000000             527
 SPRCON   0.677515984             528
 SPRCON   0.636309624             529
 SPRCON   0.636309624             530
 SPRCON   0.636309624             531
 SPRCON   0.636309624             532
 SPRCON   0.615262032             533
 SPRCON   0.611127853             534
 SPRCON   0.611127853             535
 SPRCON   0.611127853             536
 SPRCON   0.591859818             537
 SPRCON   0.931062698             538
 SPRCON   0.931062698             539
 SPRCON   0.591859818             540
 SPRCON    0.00000000             541
 SPRCON    0.00000000             542
 SPRCON    0.00000000             543
 SPRCON    0.00000000             544
 SPRCON    0.00000000             545
 SPRCON    0.00000000             546
 SPRCON    0.00000000             547
 SPRCON    0.00000000             548
 SPRCON   0.691062927             549
 SPRCON   0.683765411             550
 SPRCON   0.683765411             551
 SPRCON   0.683765411             552
 SPRCON    0.00000000             553
 SPRCON    0.00000000             554
 SPRCON    0.00000000             555
 SPRCON    0.00000000             556
 SPRCON    0.00000000             557
 SPRCON    0.00000000             558
 SPRCON    0.00000000             559
 SPRCON    0.00000000             560
 SPRCON    0.00000000             561
 SPRCON    0.00000000             562
 SPRCON    0.00000000             563
 SPRCON    0.00000000             564
 SPRCON   0.376375198             565
 SPRCON   0.376375198             566
 SPRCON   0.376375198             567
 SPRCON    0.00000000             568
 SPRCON   0.337932587             569
 SPRCON   0.337932587             570
 SPRCON   0.337932587             571
 SPRCON   0.337932587             572
 SPRCON    0.00000000             573
 SPRCON    0.00000000             574
 SPRCON    0.00000000             575
 SPRCON    0.00000000             576
 SPRCON    0.00000000             577
 SPRCON   0.311627388             578
 SPRCON   0.311627388             579
 SPRCON   0.311627388             580
 SPRCON   0.289381981             581
 SPRCON   0.289381981             582
 SPRCON   0.289381981             583
 SPRCON   0.289381981             584
 SPRCON   0.258271217             585
 SPRCON   0.258271217             586
 SPRCON   0.258271217             587
 SPRCON   0.258271217             588
 SPRCON   0.389787674             589
 SPRCON   0.389787674             590
 SPRCON   0.389787674             591
 SPRCON   0.229582787             592
 SPRCON    0.00000000             593
 SPRCON    0.00000000             594
 SPRCON    0.00000000             595
 SPRCON    0.00000000             596
 SPRCON    0.00000000             597
 SPRCON    0.00000000             598
 SPRCON    0.00000000             599
 SPRCON    0.00000000             600
 SPRCON   0.161396027             601
 SPRCON   0.161396027             602
 SPRCON   0.161396027             603
 SPRCON   0.161396027             604
 SPRCON    0.00000000             605
 SPRCON    0.00000000             606
 SPRCON    0.00000000             607
 SPRCON    0.00000000             608
 SPRCON    0.00000000             609
 SPRCON    0.00000000             610
 SPRCON    0.00000000             611
 SPRCON    0.00000000             612
 SPRCON    0.00000000             613
 SPRCON    0.00000000             614
 SPRCON    0.00000000             615
 SPRCON    0.00000000             616
 SPRCON    0.00000000             617
 SPRCON    0.00000000             618
 SPRCON    0.00000000             619
 SPRCON    0.00000000             620
 SPRCON    0.00000000             621
 SPRCON    0.00000000             622
 SPRCON    0.00000000             623
 SPRCON    0.00000000             624
 SPRCON    0.00000000             625
 SPRCON    0.00000000             626
 SPRCON    0.00000000             627
 SPRCON    0.00000000             628
 SPRCON    0.00000000             629
 SPRCON    0.00000000             630
 SPRCON    0.00000000             631
 SPRCON    0.00000000             632
 SPRCON    0.00000000             633
 SPRCON    0.00000000             634
 SPRCON    0.00000000             635
 SPRCON    0.00000000             636
 SPRCON    0.00000000             637
 SPRCON    0.00000000             638
 SPRCON    0.00000000             639
 SPRCON    0.00000000             640
 SPRCON    0.00000000             641
 SPRCON    0.00000000             642
 SPRCON    0.00000000             643
 SPRCON    0.00000000             644
 SPRCON    0.00000000             645
 SPRCON    0.00000000             646
 SPRCON    0.00000000             647
 SPRCON    0.00000000             648
 SPRCON    0.00000000             649
 SPRCON    0.00000000             650
 SPRCON    0.00000000             651
 SPRCON    0.00000000             652
 SPRCON    0.00000000             653
 SPRCON    0.00000000             654
 SPRCON    0.00000000             655
 SPRCON    0.00000000             656
 SPRCON    0.00000000             657
 SPRCON    0.00000000             658
 SPRCON    0.00000000             659
 SPRCON    0.00000000             660
 SPRCON    0.00000000             661
 SPRCON    0.00000000             662
 SPRCON    0.00000000             663
 SPRCON    0.00000000             664
 SPRCON    0.00000000             665
 SPRCON    0.00000000             666
 SPRCON    0.00000000             667
 SPRCON    0.00000000             668
 SPRCON    0.00000000             669
 SPRCON    0.00000000             670
 SPRCON    0.00000000             671
 SPRCON    0.00000000             672
 SPRCON    0.00000000             673
 SPRCON    0.00000000             674
 SPRCON    0.00000000             675
 SPRCON    0.00000000             676
 SPRCON    0.00000000             677
 SPRCON    0.00000000             678
 SPRCON    0.00000000             679
 SPRCON    0.00000000             680
 SPRCON    0.00000000             681
 SPRCON    0.00000000             682
 SPRCON    0.00000000             683
 SPRCON    0.00000000             684
 SPRCON    0.00000000             685
 SPRCON    0.00000000             686
 SPRCON    0.00000000             687
 SPRCON    0.00000000             688
 SPRCON    0.00000000             689
 SPRCON    0.00000000             690
 SPRCON    0.00000000             691
 SPRCON    0.00000000             692
 SPRCON    0.00000000             693
 SPRCON    0.00000000             694
 SPRCON    0.00000000             695
 SPRCON    0.00000000             696
 SPRCON    0.00000000             697
 SPRCON    0.00000000             698
 SPRCON    0.00000000             699
 SPRCON    0.00000000             700
 SPRCON    0.00000000             701
 SPRCON    0.00000000             702
 SPRCON    0.00000000             703
 SPRCON    0.00000000             704
 SPRCON    0.00000000             705
 SPRCON    0.00000000             706
 SPRCON    0.00000000             707
 SPRCON    0.00000000             708
 SPRCON    0.00000000             709
 SPRCON    0.00000000             710
 SPRCON    0.00000000             711
 SPRCON    0.00000000             712
 SPRCON    0.00000000             713
 SPRCON    0.00000000             714
 SPRCON    0.00000000             715
 SPRCON    0.00000000             716
 SPRCON    0.00000000             717
 SPRCON    0.00000000             718
 SPRCON    0.00000000             719
 SPRCON    0.00000000             720
 SPRCON    0.00000000             721
 SPRCON    0.00000000             722
 SPRCON    0.00000000             723
 SPRCON    0.00000000             724
 SPRCON    0.00000000             725
 SPRCON    0.00000000             726
 SPRCON    0.00000000             727
 SPRCON    0.00000000             728
 SPRCON    0.00000000             729
 SPRCON    0.00000000             730
 SPRCON    0.00000000             731
 SPRCON    0.00000000             732
 SPRCON    0.00000000             733
 SPRCON    0.00000000             734
 SPRCON    0.00000000             735
 SPRCON    0.00000000             736
 SPRCON    0.00000000             737
 SPRCON    0.00000000             738
 SPRCON    0.00000000             739
 SPRCON    0.00000000             740
 SPRCON    0.00000000             741
 SPRCON    0.00000000             742
 SPRCON    0.00000000             743
 SPRCON    0.00000000             744
 SPRCON    0.00000000             745
 SPRCON    0.00000000             746
 SPRCON    0.00000000             747
 SPRCON    0.00000000             748
 SPRCON    0.00000000             749
 SPRCON    0.00000000             750
 SPRCON    0.00000000             751
 SPRCON    0.00000000             752
 SPRCON    0.00000000             753
 SPRCON    0.00000000             754
 SPRCON    0.00000000             755
 SPRCON    0.00000000             756
 SPRCON    0.00000000             757
 SPRCON    0.00000000             758
 SPRCON    0.00000000             759
 SPRCON    0.00000000             760
 SPRCON    0.00000000             761
 SPRCON    0.00000000             762
 SPRCON    0.00000000             763
 SPRCON    0.00000000             764
 SPRCON    0.00000000             765
 SPRCON    0.00000000             766
 SPRCON    0.00000000             767
 SPRCON    0.00000000             768
 SPRCON    0.00000000             769
 SPRCON    0.00000000             770
 SPRCON    0.00000000             771
 SPRCON    0.00000000             772
 SPRCON    0.00000000             773
 SPRCON    0.00000000             774
 SPRCON    0.00000000             775
 SPRCON    0.00000000             776
 SPRCON    0.00000000             777
 SPRCON    0.00000000             778
 SPRCON    0.00000000             779
 SPRCON    0.00000000             780
 SPRCON    0.00000000             781
 SPRCON    0.00000000             782
 SPRCON    0.00000000             783
 SPRCON    0.00000000             784
 SPRCON    0.00000000             785
 SPRCON    0.00000000             786
 SPRCON    0.00000000             787
 SPRCON    0.00000000             788
 SPRCON    0.00000000             789
 SPRCON    0.00000000             790
 SPRCON    0.00000000             791
 SPRCON    0.00000000             792
 SPRCON    0.00000000             793
 SPRCON    0.00000000             794
 SPRCON    0.00000000             795
 SPRCON    0.00000000             796
 SPRCON    0.00000000             797
 SPRCON    0.00000000             798
 SPRCON    0.00000000             799
 SPRCON    0.00000000             800
 SPRCON    0.00000000             801
 SPRCON    0.00000000             802
 SPRCON    0.00000000             803
 SPRCON    0.00000000             804
 SPRCON    0.00000000             805
 SPRCON    0.00000000             806
 SPRCON    0.00000000             807
 SPRCON    0.00000000             808
 SPRCON    0.00000000             809
 SPRCON    0.00000000             810
 SPRCON    0.00000000             811
 SPRCON    0.00000000             812
 SPRCON    0.00000000             813
 SPRCON    0.00000000             814
 SPRCON    0.00000000             815
 SPRCON    0.00000000             816
 SPRCON    0.00000000             817
 SPRCON    0.00000000             818
 SPRCON    0.00000000             819
 SPRCON    0.00000000             820
 SPRCON    0.00000000             821
 SPRCON    0.00000000             822
 SPRCON    0.00000000             823
 SPRCON    0.00000000             824
 SPRCON    0.00000000             825
 SPRCON    0.00000000             826
 SPRCON    0.00000000             827
 SPRCON    0.00000000             828
 SPRCON    0.00000000             829
 SPRCON    0.00000000             830
 SPRCON    0.00000000             831
 SPRCON    0.00000000             832
 SPRCON    0.00000000             833
 SPRCON    0.00000000             834
 SPRCON    0.00000000             835
 SPRCON    0.00000000             836
 SPRCON    0.00000000             837
 SPRCON    0.00000000             838
 SPRCON    0.00000000             839
 SPRCON    0.00000000             840
 SPRCON    0.00000000             841
 SPRCON    0.00000000             842
 SPRCON    0.00000000             843
 SPRCON    0.00000000             844
 SPRCON    0.00000000             845
 SPRCON    0.00000000             846
 SPRCON    0.00000000             847
 SPRCON    0.00000000             848
 SPRCON    0.00000000             849
 SPRCON    0.00000000             850
 SPRCON    0.00000000             851
 SPRCON    0.00000000             852
 SPRCON    0.00000000             853
 SPRCON    0.00000000             854
 SPRCON    0.00000000             855
 SPRCON    0.00000000             856
 SPRCON    0.00000000             857
 SPRCON    0.00000000             858
 SPRCON    0.00000000             859
 SPRCON    0.00000000             860
 SPRCON    0.00000000             861
 SPRCON    0.00000000             862
 SPRCON    0.00000000             863
 SPRCON    0.00000000             864
 SPRCON    0.00000000             865
 SPRCON    0.00000000             866
 SPRCON    0.00000000             867
 SPRCON    0.00000000             868
 SPRCON    0.00000000             869
 SPRCON    0.00000000             870
 SPRCON    0.00000000             871
 SPRCON    0.00000000             872
 SPRCON    0.00000000             873
 SPRCON    0.00000000             874
 SPRCON    0.00000000             875
 SPRCON    0.00000000             876
 SPRCON    0.00000000             877
 SPRCON    0.00000000             878
 SPRCON    0.00000000             879
 SPRCON    0.00000000             880
 SPRCON    0.00000000             881
 SPRCON    0.00000000             882
 SPRCON    0.00000000             883
 SPRCON    0.00000000             884
 SPRCON    0.00000000             885
 SPRCON    0.00000000             886
 SPRCON    0.00000000             887
 SPRCON    0.00000000             888
 SPRCON    0.00000000             889
 SPRCON    0.00000000             890
 SPRCON    0.00000000             891
 SPRCON    0.00000000             892
 SPRCON    0.00000000             893
 SPRCON    0.00000000             894
 SPRCON    0.00000000             895
 SPRCON    0.00000000             896
 SPRCON    0.00000000             897
 SPRCON    0.00000000             898
 SPRCON    0.00000000             899
 SPRCON    0.00000000             900
 SPRCON    0.00000000             901
 SPRCON    0.00000000             902
 SPRCON    0.00000000             903
 SPRCON    0.00000000             904
 SPRCON    0.00000000             905
 SPRCON    0.00000000             906
 SPRCON    0.00000000             907
 SPRCON    0.00000000             908
 SPRCON    0.00000000             909
 SPRCON    0.00000000             910
 SPRCON    0.00000000             911
 SPRCON    0.00000000             912
 SPRCON    0.00000000             913
 SPRCON    0.00000000             914
 SPRCON    0.00000000             915
 SPRCON    0.00000000             916
 SPRCON    0.00000000             917
 SPRCON    0.00000000             918
 SPRCON    0.00000000             919
 SPRCON    0.00000000             920
 SPRCON    0.00000000             921
 SPRCON    0.00000000             922
 SPRCON    0.00000000             923
 SPRCON    0.00000000             924
 SPRCON    0.00000000             925
 SPRCON    0.00000000             926
 SPRCON    0.00000000             927
 SPRCON    0.00000000             928
 SPRCON    0.00000000             929
 SPRCON    0.00000000             930
 SPRCON    0.00000000             931
 SPRCON    0.00000000             932
 SPRCON    0.00000000             933
 SPRCON    0.00000000             934
 SPRCON    0.00000000             935
 SPRCON    0.00000000             936
 SPRCON    0.00000000             937
 SPRCON    0.00000000             938
 SPRCON    0.00000000             939
 SPRCON    0.00000000             940
 SPRCON    0.00000000             941
 SPRCON    0.00000000             942
 SPRCON    0.00000000             943
 SPRCON    0.00000000             944
 SPRCON    0.00000000             945
 SPRCON    0.00000000             946
 SPRCON    0.00000000             947
 SPRCON    0.00000000             948
 SPRCON    0.00000000             949
 SPRCON    0.00000000             950
 SPRCON    0.00000000             951
 SPRCON    0.00000000             952
 SPRCON    0.00000000             953
 SPRCON    0.00000000             954
 SPRCON    0.00000000             955
 SPRCON    0.00000000             956
 SPRCON    0.00000000             957
 SPRCON    0.00000000             958
 SPRCON    0.00000000             959
 SPRCON    0.00000000             960
 SPRCON    0.00000000             961
 SPRCON    0.00000000             962
 SPRCON    0.00000000             963
 SPRCON    0.00000000             964
 SPRCON    0.00000000             965
 SPRCON    0.00000000             966
 SPRCON    0.00000000             967
 SPRCON    0.00000000             968
 SPRCON    0.00000000             969
 SPRCON    0.00000000             970
 SPRCON    0.00000000             971
 SPRCON    0.00000000             972
 SPRCON    0.00000000             973
 SPRCON    0.00000000             974
 SPRCON    0.00000000             975
 SPRCON    0.00000000             976
 SPRCON    0.00000000             977
 SPRCON    0.00000000             978
 SPRCON    0.00000000             979
 SPRCON    0.00000000             980
 SPRCON    0.00000000             981
 SPRCON    0.00000000             982
 SPRCON    0.00000000             983
 SPRCON    0.00000000             984
 SPRCON    0.00000000             985
 SPRCON    0.00000000             986
 SPRCON    0.00000000             987
 SPRCON    0.00000000             988
 SPRCON    0.00000000             989
 SPRCON    0.00000000             990
 SPRCON    0.00000000             991
 SPRCON    0.00000000             992
 SPRCON    0.00000000             993
 SPRCON    0.00000000             994
 SPRCON    0.00000000             995
 SPRCON    0.00000000             996
 SPRCON    0.00000000             997
 SPRCON    0.00000000             998
 SPRCON    0.00000000             999
 SPRCON    0.00000000            1000
 SPRCON    0.00000000            1001
 SPRCON    0.00000000            1002
 SPRCON    0.00000000            1003
 SPRCON    0.00000000            1004
 SPRCON    0.00000000            1005
 SPRCON    0.00000000            1006
 SPRCON    0.00000000            1007
 SPRCON    0.00000000            1008
 SPRCON    0.00000000            1009
 SPRCON    0.00000000            1010
 SPRCON    0.00000000            1011
 SPRCON    0.00000000            1012
 SPRCON    0.00000000            1013
 SPRCON    0.00000000            1014
 SPRCON    0.00000000            1015
 SPRCON    0.00000000            1016
 SPRCON    0.00000000            1017
 SPRCON    0.00000000            1018
 SPRCON    0.00000000            1019
 SPRCON    0.00000000            1020
 SPRCON    0.00000000            1021
 SPRCON    0.00000000            1022
 SPRCON    0.00000000            1023
 SPRCON    0.00000000            1024
 SPRCON    0.00000000            1025
 SPRCON    0.00000000            1026
 SPRCON    0.00000000            1027
 SPRCON    0.00000000            1028
 SPRCON    0.00000000            1029
 SPRCON    0.00000000            1030
 SPRCON    0.00000000            1031
 SPRCON    0.00000000            1032
 SPRCON    0.00000000            1033
 SPRCON    0.00000000            1034
 SPRCON    0.00000000            1035
 SPRCON    0.00000000            1036
 SPRCON    0.00000000            1037
 SPRCON    0.00000000            1038
 SPRCON    0.00000000            1039
 SPRCON    0.00000000            1040
 SPRCON    0.00000000            1041
 SPRCON    0.00000000            1042
 SPRCON    0.00000000            1043
 SPRCON    0.00000000            1044
 SPRCON    0.00000000            1045
 SPRCON    0.00000000            1046
 SPRCON    0.00000000            1047
 SPRCON    0.00000000            1048
 SPRCON    0.00000000            1049
 SPRCON    0.00000000            1050
 SPRCON    0.00000000            1051
 SPRCON    0.00000000            1052
 SPRCON    0.00000000            1053
 SPRCON    0.00000000            1054
 SPRCON    0.00000000            1055
 SPRCON    0.00000000            1056
 SPRCON    0.00000000            1057
 SPRCON    0.00000000            1058
 SPRCON    0.00000000            1059
 SPRCON    0.00000000            1060
 SPRCON    0.00000000            1061
 SPRCON    0.00000000            1062
 SPRCON    0.00000000            1063
 SPRCON    0.00000000            1064
 SPRCON    0.00000000            1065
 SPRCON    0.00000000            1066
 SPRCON    0.00000000            1067
 SPRCON    0.00000000            1068
 SPRCON    0.00000000            1069
 SPRCON    0.00000000            1070
 SPRCON    0.00000000            1071
 SPRCON    0.00000000            1072
 SPRCON    0.00000000            1073
 SPRCON    0.00000000            1074
 SPRCON    0.00000000            1075
 SPRCON    0.00000000            1076
 SPRCON    0.00000000            1077
 SPRCON    0.00000000            1078
 SPRCON    0.00000000            1079
 SPRCON    0.00000000            1080
 SPRCON    0.00000000            1081
 SPRCON    0.00000000            1082
 SPRCON    0.00000000            1083
 SPRCON    0.00000000            1084
 SPRCON    0.00000000            1085
 SPRCON    0.00000000            1086
 SPRCON    0.00000000            1087
 SPRCON    0.00000000            1088
 SPRCON    0.00000000            1089
 SPRCON    0.00000000            1090
 SPRCON    0.00000000            1091
 SPRCON    0.00000000            1092
 SPRCON    0.00000000            1093
 SPRCON    0.00000000            1094
 SPRCON    0.00000000            1095
 SPRCON    0.00000000            1096
 SPRCON    0.00000000            1097
 SPRCON    0.00000000            1098
 SPRCON    0.00000000            1099
 SPRCON    0.00000000            1100
 SPRCON    0.00000000            1101
 SPRCON    0.00000000            1102
 SPRCON    0.00000000            1103
 SPRCON    0.00000000            1104
 SPRCON    0.00000000            1105
 SPRCON    0.00000000            1106
 SPRCON    0.00000000            1107
 SPRCON    0.00000000            1108
 SPRCON    0.00000000            1109
 SPRCON    0.00000000            1110
 SPRCON    0.00000000            1111
 SPRCON    0.00000000            1112
 SPRCON    0.00000000            1113
 SPRCON    0.00000000            1114
 SPRCON    0.00000000            1115
 SPRCON    0.00000000            1116
 SPRCON    0.00000000            1117
 SPRCON    0.00000000            1118
 SPRCON    0.00000000            1119
 SPRCON    0.00000000            1120
 SPRCON    0.00000000            1121
 SPRCON    0.00000000            1122
 SPRCON    0.00000000            1123
 SPRCON    0.00000000            1124
 SPRCON    0.00000000            1125
 SPRCON    0.00000000            1126
 SPRCON    0.00000000            1127
 SPRCON    0.00000000            1128
 SPRCON    0.00000000            1129
 SPRCON    0.00000000            1130
 SPRCON    0.00000000            1131
 SPRCON    0.00000000            1132
 SPRCON    0.00000000            1133
 SPRCON    0.00000000            1134
 SPRCON    0.00000000            1135
 SPRCON    0.00000000            1136
 SPRCON    0.00000000            1137
 SPRCON    0.00000000            1138
 SPRCON    0.00000000            1139
 SPRCON    0.00000000            1140
 SPRCON    0.00000000            1141
 SPRCON    0.00000000            1142
 SPRCON    0.00000000            1143
 SPRCON    0.00000000            1144
 SPRCON    0.00000000            1145
 SPRCON    0.00000000            1146
 SPRCON    0.00000000            1147
 SPRCON    0.00000000            1148
 SPRCON    0.00000000            1149
 SPRCON    0.00000000            1150
 SPRCON    0.00000000            1151
 SPRCON    0.00000000            1152
 SPRCON    0.00000000            1153
 SPRCON    0.00000000            1154
 SPRCON    0.00000000            1155
 SPRCON    0.00000000            1156
 SPRCON    0.00000000            1157
 SPRCON    0.00000000            1158
 SPRCON    0.00000000            1159
 SPRCON    0.00000000            1160
 SPRCON    0.00000000            1161
 SPRCON    0.00000000            1162
 SPRCON    0.00000000            1163
 SPRCON    0.00000000            1164
 SPRCON    0.00000000            1165
 SPRCON    0.00000000            1166
 SPRCON    0.00000000            1167
 SPRCON    0.00000000            1168
 SPRCON    0.00000000            1169
 SPRCON    0.00000000            1170
 SPRCON    0.00000000            1171
 SPRCON    0.00000000            1172
 SPRCON    0.00000000            1173
 SPRCON    0.00000000            1174
 SPRCON    0.00000000            1175
 SPRCON    0.00000000            1176
 SPRCON    0.00000000            1177
 SPRCON    0.00000000            1178
 SPRCON    0.00000000            1179
 SPRCON    0.00000000            1180
 SPRCON    0.00000000            1181
 SPRCON    0.00000000            1182
 SPRCON    0.00000000            1183
 SPRCON    0.00000000            1184
 SPRCON    0.00000000            1185
 SPRCON    0.00000000            1186
 SPRCON    0.00000000            1187
 SPRCON    0.00000000            1188
 SPRCON    0.00000000            1189
 SPRCON    0.00000000            1190
 SPRCON    0.00000000            1191
 SPRCON    0.00000000            1192
 SPRCON    0.00000000            1193
 SPRCON    0.00000000            1194
 SPRCON    0.00000000            1195
 SPRCON    0.00000000            1196
 SPRCON    0.00000000            1197
 SPRCON    0.00000000            1198
 SPRCON    0.00000000            1199
 SPRCON    0.00000000            1200
 SPRCON    0.00000000            1201
 SPRCON    0.00000000            1202
 SPRCON    0.00000000            1203
 SPRCON    0.00000000            1204
 SPRCON    0.00000000            1205
 SPRCON    0.00000000            1206
 SPRCON    0.00000000            1207
 SPRCON    0.00000000            1208
 SPRCON    0.00000000            1209
 SPRCON    0.00000000            1210
 SPRCON    0.00000000            1211
 SPRCON    0.00000000            1212
 SPRCON    0.00000000            1213
 SPRCON    0.00000000            1214
 SPRCON    0.00000000            1215
 SPRCON    0.00000000            1216
 SPRCON    0.00000000            1217
 SPRCON    0.00000000            1218
 SPRCON    0.00000000            1219
 SPRCON    0.00000000            1220
 SPRCON    0.00000000            1221
 SPRCON    0.00000000            1222
 SPRCON    0.00000000            1223
 SPRCON    0.00000000            1224
 SPRCON    0.00000000            1225
 SPRCON    0.00000000            1226
 SPRCON    0.00000000            1227
 SPRCON    0.00000000            1228
 SPRCON    0.00000000            1229
 SPRCON    0.00000000            1230
 SPRCON    0.00000000            1231
 SPRCON    0.00000000            1232
 SPRCON    0.00000000            1233
 SPRCON    0.00000000            1234
 SPRCON    0.00000000            1235
 SPRCON    0.00000000            1236
 SPRCON    0.00000000            1237
 SPRCON    0.00000000            1238
 SPRCON    0.00000000            1239
 SPRCON    0.00000000            1240
 SPRCON    0.00000000            1241
 SPRCON    0.00000000            1242
 SPRCON    0.00000000            1243
 SPRCON    0.00000000            1244
 SPRCON    0.00000000            1245
 SPRCON    0.00000000            1246
 SPRCON    0.00000000            1247
 SPRCON    0.00000000            1248
 SPRCON    0.00000000            1249
 SPRCON    0.00000000            1250
 SPRCON    0.00000000            1251
 SPRCON    0.00000000            1252
 SPRCON    0.00000000            1253
 SPRCON    0.00000000            1254
 SPRCON    0.00000000            1255
 SPRCON    0.00000000            1256
 SPRCON    0.00000000            1257
 SPRCON    0.00000000            1258
 SPRCON    0.00000000            1259
 SPRCON    0.00000000            1260
 SPRCON    0.00000000            1261
 SPRCON    0.00000000            1262
 SPRCON    0.00000000            1263
 SPRCON    0.00000000            1264
 SPRCON    0.00000000            1265
 SPRCON    0.00000000            1266
 SPRCON    0.00000000            1267
 SPRCON    0.00000000            1268
 SPRCON    0.00000000            1269
 SPRCON    0.00000000            1270
 SPRCON    0.00000000            1271
 SPRCON    0.00000000            1272
 SPRCON    0.00000000            1273
 SPRCON    0.00000000            1274
 SPRCON    0.00000000            1275
 SPRCON    0.00000000            1276
 SPRCON    0.00000000            1277
 SPRCON    0.00000000            1278
 SPRCON    0.00000000            1279
 SPRCON    0.00000000            1280
 SPRCON    0.00000000            1281
 SPRCON    0.00000000            1282
 SPRCON    0.00000000            1283
 SPRCON    0.00000000            1284
 SPRCON    0.00000000            1285
 SPRCON    0.00000000            1286
 SPRCON    0.00000000            1287
 SPRCON    0.00000000            1288
 SPRCON    0.00000000            1289
 SPRCON    0.00000000            1290
 SPRCON    0.00000000            1291
 SPRCON    0.00000000            1292
 SPRCON    0.00000000            1293
 SPRCON    0.00000000            1294
 SPRCON    0.00000000            1295
 SPRCON    0.00000000            1296
 SPRCON    0.00000000            1297
 SPRCON    0.00000000            1298
 SPRCON    0.00000000            1299
 SPRCON    0.00000000            1300
 SPRCON    0.00000000            1301
 SPRCON    0.00000000            1302
 SPRCON    0.00000000            1303
 SPRCON    0.00000000            1304
 SPRCON    0.00000000            1305
 SPRCON    0.00000000            1306
 SPRCON    0.00000000            1307
 SPRCON    0.00000000            1308
 SPRCON    0.00000000            1309
 SPRCON    0.00000000            1310
 SPRCON    0.00000000            1311
 SPRCON    0.00000000            1312
 SPRCON    0.00000000            1313
 SPRCON    0.00000000            1314
 SPRCON    0.00000000            1315
 SPRCON    0.00000000            1316
 SPRCON    0.00000000            1317
 SPRCON    0.00000000            1318
 SPRCON    0.00000000            1319
 SPRCON    0.00000000            1320
 SPRCON    0.00000000            1321
 SPRCON    0.00000000            1322
 SPRCON    0.00000000            1323
 SPRCON    0.00000000            1324
 SPRCON    0.00000000            1325
 SPRCON    0.00000000            1326
 SPRCON    0.00000000            1327
 SPRCON    0.00000000            1328
 SPRCON    0.00000000            1329
 SPRCON    0.00000000            1330
 SPRCON    0.00000000            1331
 SPRCON    0.00000000            1332
 SPRCON    0.00000000            1333
 SPRCON    0.00000000            1334
 SPRCON    0.00000000            1335
 SPRCON    0.00000000            1336
 SPRCON    0.00000000            1337
 SPRCON    0.00000000            1338
 SPRCON    0.00000000            1339
 SPRCON    0.00000000            1340
 SPRCON    0.00000000            1341
 SPRCON    0.00000000            1342
 SPRCON    0.00000000            1343
 SPRCON    0.00000000            1344
 SPRCON    0.00000000            1345
 SPRCON    0.00000000            1346
 SPRCON    0.00000000            1347
 SPRCON    0.00000000            1348
 SPRCON    0.00000000            1349
 SPRCON    0.00000000            1350
 SPRCON    0.00000000            1351
 SPRCON    0.00000000            1352
 SPRCON    0.00000000            1353
 SPRCON    0.00000000            1354
 SPRCON    0.00000000            1355
 SPRCON    0.00000000            1356
 SPRCON    0.00000000            1357
 SPRCON    0.00000000            1358
 SPRCON    0.00000000            1359
 SPRCON    0.00000000            1360
 SPRCON    0.00000000            1361
 SPRCON    0.00000000            1362
 SPRCON    0.00000000            1363
 SPRCON    0.00000000            1364
 SPRCON    0.00000000            1365
 SPRCON    0.00000000            1366
 SPRCON    0.00000000            1367
 SPRCON    0.00000000            1368
 SPRCON    0.00000000            1369
 SPRCON    0.00000000            1370
 SPRCON    0.00000000            1371
 SPRCON    0.00000000            1372
 SPRCON    0.00000000            1373
 SPRCON    0.00000000            1374
 SPRCON    0.00000000            1375
 SPRCON    0.00000000            1376
 SPRCON    0.00000000            1377
 SPRCON    0.00000000            1378
 SPRCON    0.00000000            1379
 SPRCON    0.00000000            1380
 SPRCON    0.00000000            1381
 SPRCON    0.00000000            1382
 SPRCON    0.00000000            1383
 SPRCON    0.00000000            1384
 SPRCON    0.00000000            1385
 SPRCON    0.00000000            1386
 SPRCON    0.00000000            1387
 SPRCON    0.00000000            1388
 SPRCON    0.00000000            1389
 SPRCON    0.00000000            1390
 SPRCON    0.00000000            1391
 SPRCON    0.00000000            1392
 SPRCON    0.00000000            1393
 SPRCON    0.00000000            1394
 SPRCON    0.00000000            1395
 SPRCON    0.00000000            1396
 SPRCON    0.00000000            1397
 SPRCON    0.00000000            1398
 SPRCON    0.00000000            1399
 SPRCON    0.00000000            1400
 SPRCON    0.00000000            1401
 SPRCON    0.00000000            1402
 SPRCON    0.00000000            1403
 SPRCON    0.00000000            1404
 SPRCON    0.00000000            1405
 SPRCON    0.00000000            1406
 SPRCON    0.00000000            1407
 SPRCON    0.00000000            1408
 SPRCON    0.00000000            1409
 SPRCON    0.00000000            1410
 SPRCON    0.00000000            1411
 SPRCON    0.00000000            1412
 SPRCON    0.00000000            1413
 SPRCON    0.00000000            1414
 SPRCON    0.00000000            1415
 SPRCON    0.00000000            1416
 SPRCON    0.00000000            1417
 SPRCON    0.00000000            1418
 SPRCON    0.00000000            1419
 SPRCON    0.00000000            1420
 SPRCON    0.00000000            1421
 SPRCON    0.00000000            1422
 SPRCON    0.00000000            1423
 SPRCON    0.00000000            1424
 SPRCON    0.00000000            1425
 SPRCON    0.00000000            1426
 SPRCON    0.00000000            1427
 SPRCON    0.00000000            1428
 SPRCON    0.00000000            1429
 SPRCON    0.00000000            1430
 SPRCON    0.00000000            1431
 SPRCON    0.00000000            1432
 SPRCON    0.00000000            1433
 SPRCON    0.00000000            1434
 SPRCON    0.00000000            1435
 SPRCON    0.00000000            1436
 SPRCON    0.00000000            1437
 SPRCON    0.00000000            1438
 SPRCON    0.00000000            1439
 SPRCON    0.00000000            1440
 SPRCON    0.00000000            1441
 SPRCON    0.00000000            1442
 SPRCON    0.00000000            1443
 SPRCON    0.00000000            1444
 SPRCON    0.00000000            1445
 SPRCON    0.00000000            1446
 SPRCON    0.00000000            1447
 SPRCON    0.00000000            1448
 SPRCON    0.00000000            1449
 SPRCON    0.00000000            1450
 SPRCON    0.00000000            1451
 SPRCON    0.00000000            1452
 SPRCON    0.00000000            1453
 SPRCON    0.00000000            1454
 SPRCON    0.00000000            1455
 SPRCON    0.00000000            1456
 SPRCON    0.00000000            1457
 SPRCON    0.00000000            1458
 SPRCON    0.00000000            1459
 SPRCON    0.00000000            1460
 SPRCON    0.00000000            1461
 SPRCON    0.00000000            1462
 SPRCON    0.00000000            1463
 SPRCON    0.00000000            1464
 SPRCON    0.00000000            1465
 SPRCON    0.00000000            1466
 SPRCON    0.00000000            1467
 SPRCON    0.00000000            1468
 SPRCON    0.00000000            1469
 SPRCON    0.00000000            1470
 SPRCON    0.00000000            1471
 SPRCON    0.00000000            1472
 SPRCON    0.00000000            1473
 SPRCON    0.00000000            1474
 SPRCON    0.00000000            1475
 SPRCON    0.00000000            1476
 SPRCON    0.00000000            1477
 SPRCON    0.00000000            1478
 SPRCON    0.00000000            1479
 SPRCON    0.00000000            1480
 SPRCON    0.00000000            1481
 SPRCON    0.00000000            1482
 SPRCON    0.00000000            1483
 SPRCON    0.00000000            1484
 SPRCON    0.00000000            1485
 SPRCON    0.00000000            1486
 SPRCON    0.00000000            1487
 SPRCON    0.00000000            1488
 SPRCON    0.00000000            1489
 SPRCON    0.00000000            1490
 SPRCON    0.00000000            1491
 SPRCON    0.00000000            1492
 SPRCON    0.00000000            1493
 SPRCON    0.00000000            1494
 SPRCON    0.00000000            1495
 SPRCON    0.00000000            1496
 SPRCON    0.00000000            1497
 SPRCON    0.00000000            1498
 SPRCON    0.00000000            1499
 SPRCON    0.00000000            1500
 SPRCON    0.00000000            1501
 SPRCON    0.00000000            1502
 SPRCON    0.00000000            1503
 SPRCON    0.00000000            1504
 SPRCON    0.00000000            1505
 SPRCON    0.00000000            1506
 SPRCON    0.00000000            1507
 SPRCON    0.00000000            1508
 SPRCON    0.00000000            1509
 SPRCON    0.00000000            1510
 SPRCON    0.00000000            1511
 SPRCON    0.00000000            1512
 SPRCON    0.00000000            1513
 SPRCON    0.00000000            1514
 SPRCON    0.00000000            1515
 SPRCON    0.00000000            1516
 SPRCON    0.00000000            1517
 SPRCON    0.00000000            1518
 SPRCON    0.00000000            1519
 SPRCON    0.00000000            1520
 SPRCON    0.00000000            1521
 SPRCON    0.00000000            1522
 SPRCON    0.00000000            1523
 SPRCON    0.00000000            1524
 SPRCON    0.00000000            1525
 SPRCON    0.00000000            1526
 SPRCON    0.00000000            1527
 SPRCON    0.00000000            1528
 SPRCON    0.00000000            1529
 SPRCON    0.00000000            1530
 SPRCON    0.00000000            1531
 SPRCON    0.00000000            1532
 SPRCON    0.00000000            1533
 SPRCON    0.00000000            1534
 SPRCON    0.00000000            1535
 SPRCON    0.00000000            1536
 SPRCON    0.00000000            1537
 SPRCON    0.00000000            1538
 SPRCON    0.00000000            1539
 SPRCON    0.00000000            1540
 SPRCON    0.00000000            1541
 SPRCON    0.00000000            1542
 SPRCON    0.00000000            1543
 SPRCON    0.00000000            1544
 SPRCON    0.00000000            1545
 SPRCON    0.00000000            1546
 SPRCON    0.00000000            1547
 SPRCON    0.00000000            1548
 SPRCON    0.00000000            1549
 SPRCON    0.00000000            1550
 SPRCON    0.00000000            1551
 SPRCON    0.00000000            1552
 SPRCON    0.00000000            1553
 SPRCON    0.00000000            1554
 SPRCON    0.00000000            1555
 SPRCON    0.00000000            1556
 SPRCON    0.00000000            1557
 SPRCON    0.00000000            1558
 SPRCON    0.00000000            1559
 SPRCON    0.00000000            1560
 SPRCON    0.00000000            1561
 SPRCON    0.00000000            1562
 SPRCON    0.00000000            1563
 SPRCON    0.00000000            1564
 SPRCON    0.00000000            1565
 SPRCON    0.00000000            1566
 SPRCON    0.00000000            1567
 SPRCON    0.00000000            1568
 SPRCON    0.00000000            1569
 SPRCON    0.00000000            1570
 SPRCON    0.00000000            1571
 SPRCON    0.00000000            1572
 SPRCON    0.00000000            1573
 SPRCON    0.00000000            1574
 SPRCON    0.00000000            1575
 SPRCON    0.00000000            1576
 SPRCON    0.00000000            1577
 SPRCON    0.00000000            1578
 SPRCON    0.00000000            1579
 SPRCON    0.00000000            1580
 SPRCON    0.00000000            1581
 SPRCON    0.00000000            1582
 SPRCON    0.00000000            1583
 SPRCON    0.00000000            1584
 SPRCON    0.00000000            1585
 SPRCON    0.00000000            1586
 SPRCON    0.00000000            1587
 SPRCON    0.00000000            1588
 SPRCON    0.00000000            1589
 SPRCON    0.00000000            1590
 SPRCON    0.00000000            1591
 SPRCON    0.00000000            1592
 SPRCON    0.00000000            1593
 SPRCON    0.00000000            1594
 SPRCON    0.00000000            1595
 SPRCON    0.00000000            1596
 SPRCON    0.00000000            1597
 SPRCON    0.00000000            1598
 SPRCON    0.00000000            1599
 SPRCON    0.00000000            1600
 SPRCON    0.00000000            1601
 SPRCON    0.00000000            1602
 SPRCON    0.00000000            1603
 SPRCON    0.00000000            1604
 SPRCON    0.00000000            1605
 SPRCON    0.00000000            1606
 SPRCON    0.00000000            1607
 SPRCON    0.00000000            1608
 SPRCON    0.00000000            1609
 SPRCON    0.00000000            1610
 SPRCON    0.00000000            1611
 SPRCON    0.00000000            1612
 SPRCON    0.00000000            1613
 SPRCON    0.00000000            1614
 SPRCON    0.00000000            1615
 SPRCON    0.00000000            1616
 SPRCON    0.00000000            1617
 SPRCON    0.00000000            1618
 SPRCON    0.00000000            1619
 SPRCON    0.00000000            1620
 SPRCON    0.00000000            1621
 SPRCON    0.00000000            1622
 SPRCON    0.00000000            1623
 SPRCON    0.00000000            1624
 SPRCON    0.00000000            1625
 SPRCON    0.00000000            1626
 SPRCON    0.00000000            1627
 SPRCON    0.00000000            1628
 SPRCON    0.00000000            1629
 SPRCON    0.00000000            1630
 SPRCON    0.00000000            1631
 SPRCON    0.00000000            1632
 SPRCON    0.00000000            1633
 SPRCON    0.00000000            1634
 SPRCON    0.00000000            1635
 SPRCON    0.00000000            1636
 SPRCON    0.00000000            1637
 SPRCON    0.00000000            1638
 SPRCON    0.00000000            1639
 SPRCON    0.00000000            1640
 SPRCON    0.00000000            1641
 SPRCON    0.00000000            1642
 SPRCON    0.00000000            1643
 SPRCON    0.00000000            1644
 SPRCON    0.00000000            1645
 SPRCON    0.00000000            1646
 SPRCON    0.00000000            1647
 SPRCON    0.00000000            1648
 SPRCON    0.00000000            1649
 SPRCON    0.00000000            1650
 SPRCON    0.00000000            1651
 SPRCON    0.00000000            1652
 SPRCON    0.00000000            1653
 SPRCON    0.00000000            1654
 SPRCON    0.00000000            1655
 SPRCON    0.00000000            1656
 SPRCON    0.00000000            1657
 SPRCON    0.00000000            1658
 SPRCON    0.00000000            1659
 SPRCON    0.00000000            1660
 SPRCON    0.00000000            1661
 SPRCON    0.00000000            1662
 SPRCON    0.00000000            1663
 SPRCON    0.00000000            1664
 SPRCON    0.00000000            1665
 SPRCON    0.00000000            1666
 SPRCON    0.00000000            1667
 SPRCON    0.00000000            1668
 SPRCON    0.00000000            1669
 SPRCON    0.00000000            1670
 SPRCON    0.00000000            1671
 SPRCON    0.00000000            1672
 SPRCON    0.00000000            1673
 SPRCON    0.00000000            1674
 SPRCON    0.00000000            1675
 SPRCON    0.00000000            1676
 SPRCON    0.00000000            1677
 SPRCON    0.00000000            1678
 SPRCON    0.00000000            1679
 SPRCON    0.00000000            1680
 SPRCON    0.00000000            1681
 SPRCON    0.00000000            1682
 SPRCON    0.00000000            1683
 SPRCON    0.00000000            1684
 SPRCON    0.00000000            1685
 SPRCON    0.00000000            1686
 SPRCON    0.00000000            1687
 SPRCON    0.00000000            1688
 SPRCON    0.00000000            1689
 SPRCON    0.00000000            1690
 SPRCON    0.00000000            1691
 SPRCON    0.00000000            1692
 SPRCON    0.00000000            1693
 SPRCON    0.00000000            1694
 SPRCON    0.00000000            1695
 SPRCON    0.00000000            1696
 SPRCON    0.00000000            1697
 SPRCON    0.00000000            1698
 SPRCON    0.00000000            1699
 SPRCON    0.00000000            1700
 SPRCON    0.00000000            1701
 SPRCON    0.00000000            1702
 SPRCON    0.00000000            1703
 SPRCON    0.00000000            1704
 SPRCON    0.00000000            1705
 SPRCON    0.00000000            1706
 SPRCON    0.00000000            1707
 SPRCON    0.00000000            1708
 SPRCON    0.00000000            1709
 SPRCON    0.00000000            1710
 SPRCON    0.00000000            1711
 SPRCON    0.00000000            1712
 SPRCON    0.00000000            1713
 SPRCON    0.00000000            1714
 SPRCON    0.00000000            1715
 SPRCON    0.00000000            1716
 SPRCON    0.00000000            1717
 SPRCON    0.00000000            1718
 SPRCON    0.00000000            1719
 SPRCON    0.00000000            1720
 SPRCON    0.00000000            1721
 SPRCON    0.00000000            1722
 SPRCON    0.00000000            1723
 SPRCON    0.00000000            1724
 SPRCON    0.00000000            1725
 SPRCON    0.00000000            1726
 SPRCON    0.00000000            1727
 SPRCON    0.00000000            1728
 SPRCON    0.00000000            1729
 SPRCON    0.00000000            1730
 SPRCON    0.00000000            1731
 SPRCON    0.00000000            1732
 SPRCON    0.00000000            1733
 SPRCON    0.00000000            1734
 SPRCON    0.00000000            1735
 SPRCON    0.00000000            1736
 SPRCON    0.00000000            1737
 SPRCON    0.00000000            1738
 SPRCON    0.00000000            1739
 SPRCON    0.00000000            1740
 SPRCON    0.00000000            1741
 SPRCON    0.00000000            1742
 SPRCON    0.00000000            1743
 SPRCON    0.00000000            1744
 SPRCON    0.00000000            1745
 SPRCON    0.00000000            1746
 SPRCON    0.00000000            1747
 SPRCON    0.00000000            1748
 SPRCON    0.00000000            1749
 SPRCON    0.00000000            1750
 SPRCON    0.00000000            1751
 SPRCON    0.00000000            1752
 SPRCON    0.00000000            1753
 SPRCON    0.00000000            1754
 SPRCON    0.00000000            1755
 SPRCON    0.00000000            1756
 SPRCON    0.00000000            1757
 SPRCON    0.00000000            1758
 SPRCON    0.00000000            1759
 SPRCON    0.00000000            1760
 SPRCON    0.00000000            1761
 SPRCON    0.00000000            1762
 SPRCON    0.00000000            1763
 SPRCON    0.00000000            1764
 SPRCON    0.00000000            1765
 SPRCON    0.00000000            1766
 SPRCON    0.00000000            1767
 SPRCON    0.00000000            1768
 SPRCON    0.00000000            1769
 SPRCON    0.00000000            1770
 SPRCON    0.00000000            1771
 SPRCON    0.00000000            1772
 SPRCON    0.00000000            1773
 SPRCON    0.00000000            1774
 SPRCON    0.00000000            1775
 SPRCON    0.00000000            1776
 SPRCON    0.00000000            1777
 SPRCON    0.00000000            1778
 SPRCON    0.00000000            1779
 SPRCON    0.00000000            1780
 SPRCON    0.00000000            1781
 SPRCON    0.00000000            1782
 SPRCON    0.00000000            1783
 SPRCON    0.00000000            1784
 SPRCON    0.00000000            1785
 SPRCON    0.00000000            1786
 SPRCON    0.00000000            1787
 SPRCON    0.00000000            1788
 SPRCON    0.00000000            1789
 SPRCON    0.00000000            1790
 SPRCON    0.00000000            1791
 SPRCON    0.00000000            1792
 SPRCON    0.00000000            1793
 SPRCON    0.00000000            1794
 SPRCON    0.00000000            1795
 SPRCON    0.00000000            1796
 SPRCON    0.00000000            1797
 SPRCON    0.00000000            1798
 SPRCON    0.00000000            1799
 SPRCON    0.00000000            1800
 SPRCON    0.00000000            1801
 SPRCON    0.00000000            1802
 SPRCON    0.00000000            1803
 SPRCON    0.00000000            1804
 SPRCON    0.00000000            1805
 SPRCON    0.00000000            1806
 SPRCON    0.00000000            1807
 SPRCON    0.00000000            1808
 SPRCON    0.00000000            1809
 SPRCON    0.00000000            1810
 SPRCON    0.00000000            1811
 SPRCON    0.00000000            1812
 SPRCON    0.00000000            1813
 SPRCON    0.00000000            1814
 SPRCON    0.00000000            1815
 SPRCON    0.00000000            1816
 SPRCON    0.00000000            1817
 SPRCON    0.00000000            1818
 SPRCON    0.00000000            1819
 SPRCON    0.00000000            1820
 SPRCON    0.00000000            1821
 SPRCON    0.00000000            1822
 SPRCON    0.00000000            1823
 SPRCON    0.00000000            1824
 SPRCON    0.00000000            1825
 SPRCON    0.00000000            1826
 SPRCON    0.00000000            1827
 SPRCON    0.00000000            1828
 SPRCON    0.00000000            1829
 SPRCON    0.00000000            1830
 SPRCON    0.00000000            1831
 SPRCON    0.00000000            1832
 SPRCON    0.00000000            1833
 SPRCON    0.00000000            1834
 SPRCON    0.00000000            1835
 SPRCON    0.00000000            1836
 SPRCON    0.00000000            1837
 SPRCON    0.00000000            1838
 SPRCON    0.00000000            1839
 SPRCON    0.00000000            1840
 SPRCON    0.00000000            1841
 SPRCON    0.00000000            1842
 SPRCON    0.00000000            1843
 SPRCON    0.00000000            1844
 SPRCON    0.00000000            1845
 SPRCON    0.00000000            1846
 SPRCON    0.00000000            1847
 SPRCON    0.00000000            1848
 SPRCON    0.00000000            1849
 SPRCON    0.00000000            1850
 SPRCON    0.00000000            1851
 SPRCON    0.00000000            1852
 SPRCON    0.00000000            1853
 SPRCON    0.00000000            1854
 SPRCON    0.00000000            1855
 SPRCON    0.00000000            1856
 SPRCON    0.00000000            1857
 SPRCON    0.00000000            1858
 SPRCON    0.00000000            1859
 SPRCON    0.00000000            1860
 SPRCON    0.00000000            1861
 SPRCON    0.00000000            1862
 SPRCON    0.00000000            1863
 SPRCON    0.00000000            1864
 SPRCON    0.00000000            1865
 SPRCON    0.00000000            1866
 SPRCON    0.00000000            1867
 SPRCON    0.00000000            1868
 SPRCON    0.00000000            1869
 SPRCON    0.00000000            1870
 SPRCON    0.00000000            1871
 SPRCON    0.00000000            1872
 SPRCON    0.00000000            1873
 SPRCON    0.00000000            1874
 SPRCON    0.00000000            1875
 SPRCON    0.00000000            1876
 SPRCON    0.00000000            1877
 SPRCON    0.00000000            1878
 SPRCON    0.00000000            1879
 SPRCON    0.00000000            1880
 SPRCON    0.00000000            1881
 SPRCON    0.00000000            1882
 SPRCON    0.00000000            1883
 SPRCON    0.00000000            1884
 SPRCON    0.00000000            1885
 SPRCON    0.00000000            1886
 SPRCON    0.00000000            1887
 SPRCON    0.00000000            1888
 SPRCON    0.00000000            1889
 SPRCON    0.00000000            1890
 SPRCON    0.00000000            1891
 SPRCON    0.00000000            1892
 SPRCON    0.00000000            1893
 SPRCON    0.00000000            1894
 SPRCON    0.00000000            1895
 SPRCON    0.00000000            1896
 SPRCON    0.00000000            1897
 SPRCON    0.00000000            1898
 SPRCON    0.00000000            1899
 SPRCON    0.00000000            1900
 SPRCON    0.00000000            1901
 SPRCON    0.00000000            1902
 SPRCON    0.00000000            1903
 SPRCON    0.00000000            1904
 SPRCON    0.00000000            1905
 SPRCON    0.00000000            1906
 SPRCON    0.00000000            1907
 SPRCON    0.00000000            1908
 SPRCON    0.00000000            1909
 SPRCON    0.00000000            1910
 SPRCON    0.00000000            1911
 SPRCON    0.00000000            1912
 SPRCON    0.00000000            1913
 SPRCON    0.00000000            1914
 SPRCON    0.00000000            1915
 SPRCON    0.00000000            1916
 SPRCON    0.00000000            1917
 SPRCON    0.00000000            1918
 SPRCON    0.00000000            1919
 SPRCON    0.00000000            1920
 SPRCON    0.00000000            1921
 SPRCON    0.00000000            1922
 SPRCON    0.00000000            1923
 SPRCON    0.00000000            1924
 SPRCON    0.00000000            1925
 SPRCON    0.00000000            1926
 SPRCON    0.00000000            1927
 SPRCON    0.00000000            1928
 SPRCON    0.00000000            1929
 SPRCON    0.00000000            1930
 SPRCON    0.00000000            1931
 SPRCON    0.00000000            1932
 SPRCON    0.00000000            1933
 SPRCON    0.00000000            1934
 SPRCON    0.00000000            1935
 SPRCON    0.00000000            1936
 SPRCON    0.00000000            1937
 SPRCON    0.00000000            1938
 SPRCON    0.00000000            1939
 SPRCON    0.00000000            1940
 SPRCON    0.00000000            1941
 SPRCON    0.00000000            1942
 SPRCON    0.00000000            1943
 SPRCON    0.00000000            1944
 SPRCON    0.00000000            1945
 SPRCON    0.00000000            1946
 SPRCON    0.00000000            1947
 SPRCON    0.00000000            1948
 SPRCON    0.00000000            1949
 SPRCON    0.00000000            1950
 SPRCON    0.00000000            1951
 SPRCON    0.00000000            1952
 SPRCON    0.00000000            1953
 SPRCON    0.00000000            1954
 SPRCON    0.00000000            1955
 SPRCON    0.00000000            1956
 SPRCON    0.00000000            1957
 SPRCON    0.00000000            1958
 SPRCON    0.00000000            1959
 SPRCON    0.00000000            1960
 SPRCON    0.00000000            1961
 SPRCON    0.00000000            1962
 SPRCON    0.00000000            1963
 SPRCON    0.00000000            1964
 SPRCON    0.00000000            1965
 SPRCON    0.00000000            1966
 SPRCON    0.00000000            1967
 SPRCON    0.00000000            1968
 SPRCON    0.00000000            1969
 SPRCON    0.00000000            1970
 SPRCON    0.00000000            1971
 SPRCON    0.00000000            1972
 SPRCON    0.00000000            1973
 SPRCON    0.00000000            1974
 SPRCON    0.00000000            1975
 SPRCON    0.00000000            1976
 SPRCON    0.00000000            1977
 SPRCON    0.00000000            1978
 SPRCON    0.00000000            1979
 SPRCON    0.00000000            1980
 SPRCON    0.00000000            1981
 SPRCON    0.00000000            1982
 SPRCON    0.00000000            1983
 SPRCON    0.00000000            1984
 SPRCON    0.00000000            1985
 SPRCON    0.00000000            1986
 SPRCON    0.00000000            1987
 SPRCON    0.00000000            1988
 SPRCON    0.00000000            1989
 SPRCON    0.00000000            1990
 SPRCON    0.00000000            1991
 SPRCON    0.00000000            1992
 SPRCON    0.00000000            1993
 SPRCON    0.00000000            1994
 SPRCON    0.00000000            1995
 SPRCON    0.00000000            1996
 SPRCON    0.00000000            1997
 SPRCON    0.00000000            1998
 SPRCON    0.00000000            1999
 SPRCON    0.00000000            2000
 SPRCON    0.00000000            2001
 SPRCON    0.00000000            2002
 SPRCON    0.00000000            2003
 SPRCON    0.00000000            2004
 SPRCON    0.00000000            2005
 SPRCON    0.00000000            2006
 SPRCON    0.00000000            2007
 SPRCON    0.00000000            2008
 SPRCON    0.00000000            2009
 SPRCON    0.00000000            2010
 SPRCON    0.00000000            2011
 SPRCON    0.00000000            2012
 SPRCON    0.00000000            2013
 SPRCON    0.00000000            2014
 SPRCON    0.00000000            2015
 SPRCON    0.00000000            2016
 SPRCON    0.00000000            2017
 SPRCON    0.00000000            2018
 SPRCON    0.00000000            2019
 SPRCON    0.00000000            2020
 SPRCON    0.00000000            2021
 SPRCON    0.00000000            2022
 SPRCON    0.00000000            2023
 SPRCON    0.00000000            2024
 SPRCON    0.00000000            2025
 SPRCON    0.00000000            2026
 SPRCON    0.00000000            2027
 SPRCON    0.00000000            2028
 SPRCON    0.00000000            2029
 SPRCON    0.00000000            2030
 SPRCON    0.00000000            2031
 SPRCON    0.00000000            2032
 SPRCON    0.00000000            2033
 SPRCON    0.00000000            2034
 SPRCON    0.00000000            2035
 SPRCON    0.00000000            2036
 SPRCON    0.00000000            2037
 SPRCON    0.00000000            2038
 SPRCON    0.00000000            2039
 SPRCON    0.00000000            2040
 SPRCON    0.00000000            2041
 SPRCON    0.00000000            2042
 SPRCON    0.00000000            2043
 SPRCON    0.00000000            2044
 SPRCON    0.00000000            2045
 SPRCON    0.00000000            2046
 SPRCON    0.00000000            2047
 SPRCON    0.00000000            2048
 SPRCON    0.00000000            2049
 SPRCON    0.00000000            2050
 SPRCON    0.00000000            2051
 SPRCON    0.00000000            2052
 SPRCON    0.00000000            2053
 SPRCON    0.00000000            2054
 SPRCON    0.00000000            2055
 SPRCON    0.00000000            2056
 SPRCON    0.00000000            2057
 SPRCON    0.00000000            2058
 SPRCON    0.00000000            2059
 SPRCON    0.00000000            2060
 SPRCON    0.00000000            2061
 SPRCON    0.00000000            2062
 SPRCON    0.00000000            2063
 SPRCON    0.00000000            2064
 SPRCON    0.00000000            2065
 SPRCON    0.00000000            2066
 SPRCON    0.00000000            2067
 SPRCON    0.00000000            2068
 SPRCON    0.00000000            2069
 SPRCON    0.00000000            2070
 SPRCON    0.00000000            2071
 SPRCON    0.00000000            2072
 SPRCON    0.00000000            2073
 SPRCON    0.00000000            2074
 SPRCON    0.00000000            2075
 SPRCON    0.00000000            2076
 SPRCON    0.00000000            2077
 SPRCON    0.00000000            2078
 SPRCON    0.00000000            2079
 SPRCON    0.00000000            2080
 SPRCON    0.00000000            2081
 SPRCON    0.00000000            2082
 SPRCON    0.00000000            2083
 SPRCON    0.00000000            2084
 SPRCON    0.00000000            2085
 SPRCON    0.00000000            2086
 SPRCON    0.00000000            2087
 SPRCON    0.00000000            2088
 SPRCON    0.00000000            2089
 SPRCON    0.00000000            2090
 SPRCON    0.00000000            2091
 SPRCON    0.00000000            2092
 SPRCON    0.00000000            2093
 SPRCON    0.00000000            2094
 SPRCON    0.00000000            2095
 SPRCON    0.00000000            2096
 SPRCON    0.00000000            2097
 SPRCON    0.00000000            2098
 SPRCON    0.00000000            2099
 SPRCON    0.00000000            2100
 SPRCON    0.00000000            2101
 SPRCON    0.00000000            2102
 SPRCON    0.00000000            2103
 SPRCON    0.00000000            2104
 SPRCON    0.00000000            2105
 SPRCON    0.00000000            2106
 SPRCON    0.00000000            2107
 SPRCON    0.00000000            2108
 SPRCON    0.00000000            2109
 SPRCON    0.00000000            2110
 SPRCON    0.00000000            2111
 SPRCON    0.00000000            2112
 SPRCON    0.00000000            2113
 SPRCON    0.00000000            2114
 SPRCON    0.00000000            2115
 SPRCON    0.00000000            2116
 SPRCON    0.00000000            2117
 SPRCON    0.00000000            2118
 SPRCON    0.00000000            2119
 SPRCON    0.00000000            2120
 SPRCON    0.00000000            2121
 SPRCON    0.00000000            2122
 SPRCON    0.00000000            2123
 SPRCON    0.00000000            2124
 SPRCON    0.00000000            2125
 SPRCON    0.00000000            2126
 SPRCON    0.00000000            2127
 SPRCON    0.00000000            2128
 SPRCON    0.00000000            2129
 SPRCON    0.00000000            2130
 SPRCON    0.00000000            2131
 SPRCON    0.00000000            2132
 SPRCON    0.00000000            2133
 SPRCON    0.00000000            2134
 SPRCON    0.00000000            2135
 SPRCON    0.00000000            2136
 SPRCON    0.00000000            2137
 SPRCON    0.00000000            2138
 SPRCON    0.00000000            2139
 SPRCON    0.00000000            2140
 SPRCON    0.00000000            2141
 SPRCON    0.00000000            2142
 SPRCON    0.00000000            2143
 SPRCON    0.00000000            2144
 SPRCON    0.00000000            2145
 SPRCON    0.00000000            2146
 SPRCON    0.00000000            2147
 SPRCON    0.00000000            2148
 SPRCON    0.00000000            2149
 SPRCON    0.00000000            2150
 SPRCON    0.00000000            2151
 SPRCON    0.00000000            2152
 SPRCON    0.00000000            2153
 SPRCON    0.00000000            2154
 SPRCON    0.00000000            2155
 SPRCON    0.00000000            2156
 SPRCON    0.00000000            2157
 SPRCON    0.00000000            2158
 SPRCON    0.00000000            2159
 SPRCON    0.00000000            2160
 SPRCON    0.00000000            2161
 SPRCON    0.00000000            2162
 SPRCON    0.00000000            2163
 SPRCON    0.00000000            2164
 SPRCON    0.00000000            2165
 SPRCON    0.00000000            2166
 SPRCON    0.00000000            2167
 SPRCON    0.00000000            2168
 SPRCON    0.00000000            2169
 SPRCON    0.00000000            2170
 SPRCON    0.00000000            2171
 SPRCON    0.00000000            2172
 SPRCON    0.00000000            2173
 SPRCON    0.00000000            2174
 SPRCON    0.00000000            2175
 SPRCON    0.00000000            2176
 SPRCON    0.00000000            2177
 SPRCON    0.00000000            2178
 SPRCON    0.00000000            2179
 SPRCON    0.00000000            2180
 SPRCON    0.00000000            2181
 SPRCON    0.00000000            2182
 SPRCON    0.00000000            2183
 SPRCON    0.00000000            2184
 SPRCON    0.00000000            2185
 SPRCON    0.00000000            2186
 SPRCON    0.00000000            2187
 SPRCON    0.00000000            2188
 SPRCON    0.00000000            2189
 SPRCON    0.00000000            2190
 SPRCON    0.00000000            2191
 SPRCON    0.00000000            2192
 SPRCON    0.00000000            2193
 SPRCON    0.00000000            2194
 SPRCON    0.00000000            2195
 SPRCON    0.00000000            2196
 SPRCON    0.00000000            2197
 SPRCON    0.00000000            2198
 SPRCON    0.00000000            2199
 SPRCON    0.00000000            2200
 SPRCON    0.00000000            2201
 SPRCON    0.00000000            2202
 SPRCON    0.00000000            2203
 SPRCON    0.00000000            2204
 SPRCON    0.00000000            2205
 SPRCON    0.00000000            2206
 SPRCON    0.00000000            2207
 SPRCON    0.00000000            2208
 SPRCON    0.00000000            2209
 SPRCON    0.00000000            2210
 SPRCON    0.00000000            2211
 SPRCON    0.00000000            2212
 SPRCON    0.00000000            2213
 SPRCON    0.00000000            2214
 SPRCON    0.00000000            2215
 SPRCON    0.00000000            2216
 SPRCON    0.00000000            2217
 SPRCON    0.00000000            2218
 SPRCON    0.00000000            2219
 SPRCON    0.00000000            2220
 SPRCON    0.00000000            2221
 SPRCON    0.00000000            2222
 SPRCON    0.00000000            2223
 SPRCON    0.00000000            2224
 SPRCON    0.00000000            2225
 SPRCON    0.00000000            2226
 SPRCON    0.00000000            2227
 SPRCON    0.00000000            2228
 SPRCON    0.00000000            2229
 SPRCON    0.00000000            2230
 SPRCON    0.00000000            2231
 SPRCON    0.00000000            2232
 SPRCON    0.00000000            2233
 SPRCON    0.00000000            2234
 SPRCON    0.00000000            2235
 SPRCON    0.00000000            2236
 SPRCON    0.00000000            2237
 SPRCON    0.00000000            2238
 SPRCON    0.00000000            2239
 SPRCON    0.00000000            2240
 SPRCON    0.00000000            2241
 SPRCON    0.00000000            2242
 SPRCON    0.00000000            2243
 SPRCON    0.00000000            2244
 SPRCON    0.00000000            2245
 SPRCON    0.00000000            2246
 SPRCON    0.00000000            2247
 SPRCON    0.00000000            2248
 SPRCON    0.00000000            2249
 SPRCON    0.00000000            2250
 SPRCON    0.00000000            2251
 SPRCON    0.00000000            2252
 SPRCON    0.00000000            2253
 SPRCON    0.00000000            2254
 SPRCON    0.00000000            2255
 SPRCON    0.00000000            2256
 SPRCON    0.00000000            2257
 SPRCON    0.00000000            2258
 SPRCON    0.00000000            2259
 SPRCON    0.00000000            2260
 SPRCON    0.00000000            2261
 SPRCON    0.00000000            2262
 SPRCON    0.00000000            2263
 SPRCON    0.00000000            2264
 SPRCON    0.00000000            2265
 SPRCON    0.00000000            2266
 SPRCON    0.00000000            2267
 SPRCON    0.00000000            2268
 SPRCON    0.00000000            2269
 SPRCON    0.00000000            2270
 SPRCON    0.00000000            2271
 SPRCON    0.00000000            2272
 SPRCON    0.00000000            2273
 SPRCON    0.00000000            2274
 SPRCON    0.00000000            2275
 SPRCON    0.00000000            2276
 SPRCON    0.00000000            2277
 SPRCON    0.00000000            2278
 SPRCON    0.00000000            2279
 SPRCON    0.00000000            2280
 SPRCON    0.00000000            2281
 SPRCON    0.00000000            2282
 SPRCON    0.00000000            2283
 SPRCON    0.00000000            2284
 SPRCON    0.00000000            2285
 SPRCON    0.00000000            2286
 SPRCON    0.00000000            2287
 SPRCON    0.00000000            2288
 SPRCON    0.00000000            2289
 SPRCON    0.00000000            2290
 SPRCON    0.00000000            2291
 SPRCON    0.00000000            2292
 SPRCON    0.00000000            2293
 SPRCON    0.00000000            2294
 SPRCON    0.00000000            2295
 SPRCON    0.00000000            2296
 SPRCON    0.00000000            2297
 SPRCON    0.00000000            2298
 SPRCON    0.00000000            2299
 SPRCON    0.00000000            2300
