# Supplementary material for: A Process for Modelling Diffuse Scattering from Disordered Molecular Crystals, Illustrated by Application to Monoclinic 9-Chloro-10-methylanthracene
Source: Hindawi journal article supplement (doi:10.1155/2015/878463), 2015-01-01
Supplement: f2 [file 878463.f2.zip › 878463.f2/CMA_simulations/CMA_initial_random_occ.txt]

 1 1 1 1 1 1
 1 1 1 2 1 1
 1 1 1 3 1 1
 1 1 1 4 1 1
 1 1 2 1 2 1
 1 1 2 2 1 1
 1 1 2 3 2 1
 1 1 2 4 1 1
 1 1 3 1 1 1
 1 1 3 2 2 1
 1 1 3 3 2 1
 1 1 3 4 2 1
 1 1 4 1 2 1
 1 1 4 2 2 1
 1 1 4 3 1 1
 1 1 4 4 2 1
 1 1 5 1 1 1
 1 1 5 2 1 1
 1 1 5 3 1 1
 1 1 5 4 1 1
 1 1 6 1 1 1
 1 1 6 2 1 1
 1 1 6 3 2 1
 1 1 6 4 1 1
 1 1 7 1 1 1
 1 1 7 2 1 1
 1 1 7 3 1 1
 1 1 7 4 1 1
 1 1 8 1 1 1
 1 1 8 2 1 1
 1 1 8 3 1 1
 1 1 8 4 1 1
 1 1 9 1 2 1
 1 1 9 2 1 1
 1 1 9 3 2 1
 1 1 9 4 2 1
 1 1 10 1 1 1
 1 1 10 2 1 1
 1 1 10 3 1 1
 1 1 10 4 2 1
 1 1 11 1 1 1
 1 1 11 2 1 1
 1 1 11 3 1 1
 1 1 11 4 1 1
 1 1 12 1 1 1
 1 1 12 2 1 1
 1 1 12 3 1 1
 1 1 12 4 1 1
 1 1 13 1 1 1
 1 1 13 2 1 1
 1 1 13 3 1 1
 1 1 13 4 1 1
 1 1 14 1 1 1
 1 1 14 2 1 1
 1 1 14 3 1 1
 1 1 14 4 2 1
 1 1 15 1 2 1
 1 1 15 2 2 1
 1 1 15 3 1 1
 1 1 15 4 1 1
 1 1 16 1 1 1
 1 1 16 2 1 1
 1 1 16 3 1 1
 1 1 16 4 1 1
 1 1 17 1 1 1
 1 1 17 2 2 1
 1 1 17 3 2 1
 1 1 17 4 1 1
 1 1 18 1 1 1
 1 1 18 2 1 1
 1 1 18 3 1 1
 1 1 18 4 2 1
 1 1 19 1 2 1
 1 1 19 2 1 1
 1 1 19 3 1 1
 1 1 19 4 2 1
 1 1 20 1 2 1
 1 1 20 2 1 1
 1 1 20 3 2 1
 1 1 20 4 2 1
 1 1 21 1 1 1
 1 1 21 2 1 1
 1 1 21 3 1 1
 1 1 21 4 2 1
 1 1 22 1 1 1
 1 1 22 2 2 1
 1 1 22 3 2 1
 1 1 22 4 1 1
 1 1 23 1 1 1
 1 1 23 2 2 1
 1 1 23 3 1 1
 1 1 23 4 2 1
 1 1 24 1 1 1
 1 1 24 2 1 1
 1 1 24 3 2 1
 1 1 24 4 2 1
 1 1 25 1 1 1
 1 1 25 2 1 1
 1 1 25 3 1 1
 1 1 25 4 1 1
 1 1 26 1 1 1
 1 1 26 2 1 1
 1 1 26 3 1 1
 1 1 26 4 1 1
 1 1 27 1 1 1
 1 1 27 2 1 1
 1 1 27 3 1 1
 1 1 27 4 2 1
 1 1 28 1 2 1
 1 1 28 2 1 1
 1 1 28 3 1 1
 1 1 28 4 2 1
 1 1 29 1 2 1
 1 1 29 2 2 1
 1 1 29 3 1 1
 1 1 29 4 2 1
 1 1 30 1 1 1
 1 1 30 2 1 1
 1 1 30 3 1 1
 1 1 30 4 2 1
 1 1 31 1 1 1
 1 1 31 2 1 1
 1 1 31 3 1 1
 1 1 31 4 1 1
 1 1 32 1 2 1
 1 1 32 2 1 1
 1 1 32 3 1 1
 1 1 32 4 2 1
 1 2 1 1 1 1
 1 2 1 2 2 1
 1 2 1 3 1 1
 1 2 1 4 2 1
 1 2 2 1 2 1
 1 2 2 2 2 1
 1 2 2 3 1 1
 1 2 2 4 1 1
 1 2 3 1 1 1
 1 2 3 2 1 1
 1 2 3 3 1 1
 1 2 3 4 2 1
 1 2 4 1 2 1
 1 2 4 2 2 1
 1 2 4 3 2 1
 1 2 4 4 2 1
 1 2 5 1 2 1
 1 2 5 2 1 1
 1 2 5 3 1 1
 1 2 5 4 1 1
 1 2 6 1 1 1
 1 2 6 2 2 1
 1 2 6 3 1 1
 1 2 6 4 2 1
 1 2 7 1 1 1
 1 2 7 2 1 1
 1 2 7 3 1 1
 1 2 7 4 1 1
 1 2 8 1 1 1
 1 2 8 2 1 1
 1 2 8 3 1 1
 1 2 8 4 2 1
 1 2 9 1 1 1
 1 2 9 2 2 1
 1 2 9 3 1 1
 1 2 9 4 2 1
 1 2 10 1 2 1
 1 2 10 2 2 1
 1 2 10 3 1 1
 1 2 10 4 1 1
 1 2 11 1 2 1
 1 2 11 2 1 1
 1 2 11 3 1 1
 1 2 11 4 1 1
 1 2 12 1 1 1
 1 2 12 2 2 1
 1 2 12 3 1 1
 1 2 12 4 1 1
 1 2 13 1 2 1
 1 2 13 2 1 1
 1 2 13 3 2 1
 1 2 13 4 2 1
 1 2 14 1 1 1
 1 2 14 2 1 1
 1 2 14 3 1 1
 1 2 14 4 1 1
 1 2 15 1 1 1
 1 2 15 2 1 1
 1 2 15 3 2 1
 1 2 15 4 1 1
 1 2 16 1 1 1
 1 2 16 2 2 1
 1 2 16 3 1 1
 1 2 16 4 1 1
 1 2 17 1 1 1
 1 2 17 2 2 1
 1 2 17 3 1 1
 1 2 17 4 1 1
 1 2 18 1 1 1
 1 2 18 2 1 1
 1 2 18 3 1 1
 1 2 18 4 1 1
 1 2 19 1 2 1
 1 2 19 2 1 1
 1 2 19 3 2 1
 1 2 19 4 1 1
 1 2 20 1 1 1
 1 2 20 2 2 1
 1 2 20 3 1 1
 1 2 20 4 1 1
 1 2 21 1 2 1
 1 2 21 2 1 1
 1 2 21 3 2 1
 1 2 21 4 1 1
 1 2 22 1 1 1
 1 2 22 2 1 1
 1 2 22 3 2 1
 1 2 22 4 1 1
 1 2 23 1 1 1
 1 2 23 2 1 1
 1 2 23 3 2 1
 1 2 23 4 1 1
 1 2 24 1 1 1
 1 2 24 2 1 1
 1 2 24 3 2 1
 1 2 24 4 1 1
 1 2 25 1 1 1
 1 2 25 2 1 1
 1 2 25 3 1 1
 1 2 25 4 2 1
 1 2 26 1 2 1
 1 2 26 2 1 1
 1 2 26 3 1 1
 1 2 26 4 2 1
 1 2 27 1 2 1
 1 2 27 2 1 1
 1 2 27 3 1 1
 1 2 27 4 1 1
 1 2 28 1 2 1
 1 2 28 2 1 1
 1 2 28 3 2 1
 1 2 28 4 1 1
 1 2 29 1 2 1
 1 2 29 2 1 1
 1 2 29 3 1 1
 1 2 29 4 1 1
 1 2 30 1 2 1
 1 2 30 2 1 1
 1 2 30 3 1 1
 1 2 30 4 2 1
 1 2 31 1 1 1
 1 2 31 2 2 1
 1 2 31 3 1 1
 1 2 31 4 1 1
 1 2 32 1 1 1
 1 2 32 2 1 1
 1 2 32 3 1 1
 1 2 32 4 1 1
 1 3 1 1 1 1
 1 3 1 2 2 1
 1 3 1 3 2 1
 1 3 1 4 2 1
 1 3 2 1 1 1
 1 3 2 2 2 1
 1 3 2 3 1 1
 1 3 2 4 2 1
 1 3 3 1 1 1
 1 3 3 2 2 1
 1 3 3 3 1 1
 1 3 3 4 1 1
 1 3 4 1 2 1
 1 3 4 2 2 1
 1 3 4 3 2 1
 1 3 4 4 2 1
 1 3 5 1 2 1
 1 3 5 2 1 1
 1 3 5 3 1 1
 1 3 5 4 1 1
 1 3 6 1 2 1
 1 3 6 2 1 1
 1 3 6 3 2 1
 1 3 6 4 1 1
 1 3 7 1 2 1
 1 3 7 2 1 1
 1 3 7 3 1 1
 1 3 7 4 1 1
 1 3 8 1 1 1
 1 3 8 2 1 1
 1 3 8 3 1 1
 1 3 8 4 1 1
 1 3 9 1 1 1
 1 3 9 2 1 1
 1 3 9 3 2 1
 1 3 9 4 1 1
 1 3 10 1 1 1
 1 3 10 2 1 1
 1 3 10 3 1 1
 1 3 10 4 1 1
 1 3 11 1 2 1
 1 3 11 2 1 1
 1 3 11 3 1 1
 1 3 11 4 1 1
 1 3 12 1 1 1
 1 3 12 2 1 1
 1 3 12 3 1 1
 1 3 12 4 2 1
 1 3 13 1 1 1
 1 3 13 2 2 1
 1 3 13 3 1 1
 1 3 13 4 1 1
 1 3 14 1 1 1
 1 3 14 2 1 1
 1 3 14 3 1 1
 1 3 14 4 1 1
 1 3 15 1 1 1
 1 3 15 2 2 1
 1 3 15 3 2 1
 1 3 15 4 1 1
 1 3 16 1 1 1
 1 3 16 2 1 1
 1 3 16 3 1 1
 1 3 16 4 1 1
 1 3 17 1 1 1
 1 3 17 2 1 1
 1 3 17 3 1 1
 1 3 17 4 1 1
 1 3 18 1 2 1
 1 3 18 2 1 1
 1 3 18 3 1 1
 1 3 18 4 2 1
 1 3 19 1 2 1
 1 3 19 2 1 1
 1 3 19 3 2 1
 1 3 19 4 1 1
 1 3 20 1 1 1
 1 3 20 2 1 1
 1 3 20 3 1 1
 1 3 20 4 2 1
 1 3 21 1 1 1
 1 3 21 2 1 1
 1 3 21 3 1 1
 1 3 21 4 1 1
 1 3 22 1 1 1
 1 3 22 2 1 1
 1 3 22 3 2 1
 1 3 22 4 2 1
 1 3 23 1 1 1
 1 3 23 2 1 1
 1 3 23 3 1 1
 1 3 23 4 1 1
 1 3 24 1 2 1
 1 3 24 2 1 1
 1 3 24 3 1 1
 1 3 24 4 1 1
 1 3 25 1 1 1
 1 3 25 2 1 1
 1 3 25 3 2 1
 1 3 25 4 2 1
 1 3 26 1 1 1
 1 3 26 2 2 1
 1 3 26 3 1 1
 1 3 26 4 1 1
 1 3 27 1 2 1
 1 3 27 2 1 1
 1 3 27 3 2 1
 1 3 27 4 2 1
 1 3 28 1 1 1
 1 3 28 2 1 1
 1 3 28 3 1 1
 1 3 28 4 1 1
 1 3 29 1 1 1
 1 3 29 2 1 1
 1 3 29 3 2 1
 1 3 29 4 1 1
 1 3 30 1 1 1
 1 3 30 2 1 1
 1 3 30 3 2 1
 1 3 30 4 2 1
 1 3 31 1 1 1
 1 3 31 2 1 1
 1 3 31 3 1 1
 1 3 31 4 1 1
 1 3 32 1 2 1
 1 3 32 2 2 1
 1 3 32 3 2 1
 1 3 32 4 1 1
 1 4 1 1 2 1
 1 4 1 2 1 1
 1 4 1 3 2 1
 1 4 1 4 1 1
 1 4 2 1 1 1
 1 4 2 2 1 1
 1 4 2 3 1 1
 1 4 2 4 1 1
 1 4 3 1 1 1
 1 4 3 2 2 1
 1 4 3 3 1 1
 1 4 3 4 1 1
 1 4 4 1 1 1
 1 4 4 2 1 1
 1 4 4 3 2 1
 1 4 4 4 1 1
 1 4 5 1 1 1
 1 4 5 2 2 1
 1 4 5 3 1 1
 1 4 5 4 2 1
 1 4 6 1 2 1
 1 4 6 2 1 1
 1 4 6 3 1 1
 1 4 6 4 2 1
 1 4 7 1 1 1
 1 4 7 2 1 1
 1 4 7 3 1 1
 1 4 7 4 1 1
 1 4 8 1 1 1
 1 4 8 2 1 1
 1 4 8 3 1 1
 1 4 8 4 1 1
 1 4 9 1 1 1
 1 4 9 2 1 1
 1 4 9 3 1 1
 1 4 9 4 1 1
 1 4 10 1 1 1
 1 4 10 2 1 1
 1 4 10 3 2 1
 1 4 10 4 1 1
 1 4 11 1 1 1
 1 4 11 2 1 1
 1 4 11 3 2 1
 1 4 11 4 1 1
 1 4 12 1 1 1
 1 4 12 2 1 1
 1 4 12 3 2 1
 1 4 12 4 2 1
 1 4 13 1 1 1
 1 4 13 2 1 1
 1 4 13 3 1 1
 1 4 13 4 1 1
 1 4 14 1 2 1
 1 4 14 2 1 1
 1 4 14 3 1 1
 1 4 14 4 1 1
 1 4 15 1 1 1
 1 4 15 2 1 1
 1 4 15 3 1 1
 1 4 15 4 2 1
 1 4 16 1 1 1
 1 4 16 2 1 1
 1 4 16 3 2 1
 1 4 16 4 1 1
 1 4 17 1 2 1
 1 4 17 2 1 1
 1 4 17 3 2 1
 1 4 17 4 2 1
 1 4 18 1 1 1
 1 4 18 2 2 1
 1 4 18 3 1 1
 1 4 18 4 1 1
 1 4 19 1 1 1
 1 4 19 2 1 1
 1 4 19 3 1 1
 1 4 19 4 1 1
 1 4 20 1 1 1
 1 4 20 2 2 1
 1 4 20 3 2 1
 1 4 20 4 1 1
 1 4 21 1 1 1
 1 4 21 2 2 1
 1 4 21 3 1 1
 1 4 21 4 2 1
 1 4 22 1 1 1
 1 4 22 2 2 1
 1 4 22 3 1 1
 1 4 22 4 2 1
 1 4 23 1 1 1
 1 4 23 2 1 1
 1 4 23 3 2 1
 1 4 23 4 2 1
 1 4 24 1 1 1
 1 4 24 2 2 1
 1 4 24 3 1 1
 1 4 24 4 1 1
 1 4 25 1 2 1
 1 4 25 2 1 1
 1 4 25 3 1 1
 1 4 25 4 2 1
 1 4 26 1 1 1
 1 4 26 2 1 1
 1 4 26 3 1 1
 1 4 26 4 2 1
 1 4 27 1 2 1
 1 4 27 2 1 1
 1 4 27 3 1 1
 1 4 27 4 2 1
 1 4 28 1 1 1
 1 4 28 2 2 1
 1 4 28 3 1 1
 1 4 28 4 1 1
 1 4 29 1 1 1
 1 4 29 2 1 1
 1 4 29 3 2 1
 1 4 29 4 1 1
 1 4 30 1 1 1
 1 4 30 2 1 1
 1 4 30 3 1 1
 1 4 30 4 1 1
 1 4 31 1 1 1
 1 4 31 2 2 1
 1 4 31 3 1 1
 1 4 31 4 1 1
 1 4 32 1 1 1
 1 4 32 2 2 1
 1 4 32 3 1 1
 1 4 32 4 1 1
 1 5 1 1 1 1
 1 5 1 2 1 1
 1 5 1 3 1 1
 1 5 1 4 1 1
 1 5 2 1 1 1
 1 5 2 2 2 1
 1 5 2 3 2 1
 1 5 2 4 1 1
 1 5 3 1 1 1
 1 5 3 2 2 1
 1 5 3 3 1 1
 1 5 3 4 2 1
 1 5 4 1 2 1
 1 5 4 2 2 1
 1 5 4 3 2 1
 1 5 4 4 2 1
 1 5 5 1 1 1
 1 5 5 2 2 1
 1 5 5 3 1 1
 1 5 5 4 1 1
 1 5 6 1 1 1
 1 5 6 2 1 1
 1 5 6 3 2 1
 1 5 6 4 2 1
 1 5 7 1 1 1
 1 5 7 2 1 1
 1 5 7 3 2 1
 1 5 7 4 2 1
 1 5 8 1 1 1
 1 5 8 2 2 1
 1 5 8 3 1 1
 1 5 8 4 1 1
 1 5 9 1 1 1
 1 5 9 2 1 1
 1 5 9 3 1 1
 1 5 9 4 2 1
 1 5 10 1 2 1
 1 5 10 2 2 1
 1 5 10 3 1 1
 1 5 10 4 1 1
 1 5 11 1 1 1
 1 5 11 2 2 1
 1 5 11 3 1 1
 1 5 11 4 2 1
 1 5 12 1 1 1
 1 5 12 2 1 1
 1 5 12 3 1 1
 1 5 12 4 1 1
 1 5 13 1 2 1
 1 5 13 2 1 1
 1 5 13 3 2 1
 1 5 13 4 2 1
 1 5 14 1 1 1
 1 5 14 2 1 1
 1 5 14 3 1 1
 1 5 14 4 1 1
 1 5 15 1 2 1
 1 5 15 2 1 1
 1 5 15 3 2 1
 1 5 15 4 1 1
 1 5 16 1 1 1
 1 5 16 2 2 1
 1 5 16 3 1 1
 1 5 16 4 1 1
 1 5 17 1 1 1
 1 5 17 2 1 1
 1 5 17 3 2 1
 1 5 17 4 1 1
 1 5 18 1 1 1
 1 5 18 2 2 1
 1 5 18 3 2 1
 1 5 18 4 1 1
 1 5 19 1 1 1
 1 5 19 2 2 1
 1 5 19 3 1 1
 1 5 19 4 1 1
 1 5 20 1 1 1
 1 5 20 2 2 1
 1 5 20 3 1 1
 1 5 20 4 1 1
 1 5 21 1 2 1
 1 5 21 2 1 1
 1 5 21 3 2 1
 1 5 21 4 1 1
 1 5 22 1 2 1
 1 5 22 2 1 1
 1 5 22 3 2 1
 1 5 22 4 2 1
 1 5 23 1 1 1
 1 5 23 2 1 1
 1 5 23 3 1 1
 1 5 23 4 2 1
 1 5 24 1 1 1
 1 5 24 2 1 1
 1 5 24 3 1 1
 1 5 24 4 2 1
 1 5 25 1 1 1
 1 5 25 2 2 1
 1 5 25 3 1 1
 1 5 25 4 2 1
 1 5 26 1 1 1
 1 5 26 2 1 1
 1 5 26 3 2 1
 1 5 26 4 1 1
 1 5 27 1 1 1
 1 5 27 2 2 1
 1 5 27 3 1 1
 1 5 27 4 2 1
 1 5 28 1 1 1
 1 5 28 2 1 1
 1 5 28 3 1 1
 1 5 28 4 1 1
 1 5 29 1 2 1
 1 5 29 2 1 1
 1 5 29 3 1 1
 1 5 29 4 2 1
 1 5 30 1 2 1
 1 5 30 2 1 1
 1 5 30 3 2 1
 1 5 30 4 1 1
 1 5 31 1 2 1
 1 5 31 2 1 1
 1 5 31 3 2 1
 1 5 31 4 1 1
 1 5 32 1 1 1
 1 5 32 2 1 1
 1 5 32 3 1 1
 1 5 32 4 1 1
 1 6 1 1 2 1
 1 6 1 2 2 1
 1 6 1 3 1 1
 1 6 1 4 1 1
 1 6 2 1 1 1
 1 6 2 2 1 1
 1 6 2 3 2 1
 1 6 2 4 1 1
 1 6 3 1 1 1
 1 6 3 2 1 1
 1 6 3 3 1 1
 1 6 3 4 1 1
 1 6 4 1 1 1
 1 6 4 2 1 1
 1 6 4 3 2 1
 1 6 4 4 1 1
 1 6 5 1 2 1
 1 6 5 2 1 1
 1 6 5 3 1 1
 1 6 5 4 1 1
 1 6 6 1 2 1
 1 6 6 2 2 1
 1 6 6 3 1 1
 1 6 6 4 2 1
 1 6 7 1 1 1
 1 6 7 2 2 1
 1 6 7 3 2 1
 1 6 7 4 1 1
 1 6 8 1 2 1
 1 6 8 2 2 1
 1 6 8 3 2 1
 1 6 8 4 1 1
 1 6 9 1 1 1
 1 6 9 2 1 1
 1 6 9 3 1 1
 1 6 9 4 1 1
 1 6 10 1 1 1
 1 6 10 2 1 1
 1 6 10 3 1 1
 1 6 10 4 1 1
 1 6 11 1 1 1
 1 6 11 2 1 1
 1 6 11 3 1 1
 1 6 11 4 1 1
 1 6 12 1 1 1
 1 6 12 2 1 1
 1 6 12 3 2 1
 1 6 12 4 1 1
 1 6 13 1 1 1
 1 6 13 2 2 1
 1 6 13 3 1 1
 1 6 13 4 1 1
 1 6 14 1 1 1
 1 6 14 2 2 1
 1 6 14 3 2 1
 1 6 14 4 1 1
 1 6 15 1 2 1
 1 6 15 2 1 1
 1 6 15 3 1 1
 1 6 15 4 1 1
 1 6 16 1 2 1
 1 6 16 2 1 1
 1 6 16 3 1 1
 1 6 16 4 1 1
 1 6 17 1 2 1
 1 6 17 2 2 1
 1 6 17 3 1 1
 1 6 17 4 2 1
 1 6 18 1 1 1
 1 6 18 2 1 1
 1 6 18 3 1 1
 1 6 18 4 1 1
 1 6 19 1 1 1
 1 6 19 2 1 1
 1 6 19 3 2 1
 1 6 19 4 1 1
 1 6 20 1 2 1
 1 6 20 2 1 1
 1 6 20 3 2 1
 1 6 20 4 1 1
 1 6 21 1 1 1
 1 6 21 2 1 1
 1 6 21 3 2 1
 1 6 21 4 1 1
 1 6 22 1 1 1
 1 6 22 2 2 1
 1 6 22 3 1 1
 1 6 22 4 1 1
 1 6 23 1 1 1
 1 6 23 2 1 1
 1 6 23 3 2 1
 1 6 23 4 1 1
 1 6 24 1 2 1
 1 6 24 2 2 1
 1 6 24 3 1 1
 1 6 24 4 1 1
 1 6 25 1 1 1
 1 6 25 2 2 1
 1 6 25 3 1 1
 1 6 25 4 2 1
 1 6 26 1 1 1
 1 6 26 2 2 1
 1 6 26 3 1 1
 1 6 26 4 2 1
 1 6 27 1 1 1
 1 6 27 2 1 1
 1 6 27 3 1 1
 1 6 27 4 2 1
 1 6 28 1 1 1
 1 6 28 2 1 1
 1 6 28 3 1 1
 1 6 28 4 1 1
 1 6 29 1 2 1
 1 6 29 2 2 1
 1 6 29 3 2 1
 1 6 29 4 2 1
 1 6 30 1 1 1
 1 6 30 2 1 1
 1 6 30 3 1 1
 1 6 30 4 1 1
 1 6 31 1 2 1
 1 6 31 2 1 1
 1 6 31 3 2 1
 1 6 31 4 1 1
 1 6 32 1 2 1
 1 6 32 2 1 1
 1 6 32 3 1 1
 1 6 32 4 2 1
 1 7 1 1 2 1
 1 7 1 2 1 1
 1 7 1 3 1 1
 1 7 1 4 1 1
 1 7 2 1 1 1
 1 7 2 2 2 1
 1 7 2 3 1 1
 1 7 2 4 1 1
 1 7 3 1 1 1
 1 7 3 2 1 1
 1 7 3 3 2 1
 1 7 3 4 1 1
 1 7 4 1 1 1
 1 7 4 2 1 1
 1 7 4 3 2 1
 1 7 4 4 1 1
 1 7 5 1 1 1
 1 7 5 2 1 1
 1 7 5 3 1 1
 1 7 5 4 1 1
 1 7 6 1 2 1
 1 7 6 2 1 1
 1 7 6 3 1 1
 1 7 6 4 1 1
 1 7 7 1 2 1
 1 7 7 2 1 1
 1 7 7 3 1 1
 1 7 7 4 2 1
 1 7 8 1 1 1
 1 7 8 2 1 1
 1 7 8 3 1 1
 1 7 8 4 1 1
 1 7 9 1 1 1
 1 7 9 2 1 1
 1 7 9 3 1 1
 1 7 9 4 2 1
 1 7 10 1 2 1
 1 7 10 2 1 1
 1 7 10 3 2 1
 1 7 10 4 1 1
 1 7 11 1 1 1
 1 7 11 2 1 1
 1 7 11 3 1 1
 1 7 11 4 1 1
 1 7 12 1 1 1
 1 7 12 2 1 1
 1 7 12 3 1 1
 1 7 12 4 1 1
 1 7 13 1 1 1
 1 7 13 2 2 1
 1 7 13 3 1 1
 1 7 13 4 1 1
 1 7 14 1 1 1
 1 7 14 2 1 1
 1 7 14 3 1 1
 1 7 14 4 1 1
 1 7 15 1 2 1
 1 7 15 2 1 1
 1 7 15 3 1 1
 1 7 15 4 2 1
 1 7 16 1 2 1
 1 7 16 2 1 1
 1 7 16 3 2 1
 1 7 16 4 2 1
 1 7 17 1 1 1
 1 7 17 2 2 1
 1 7 17 3 2 1
 1 7 17 4 1 1
 1 7 18 1 2 1
 1 7 18 2 1 1
 1 7 18 3 1 1
 1 7 18 4 2 1
 1 7 19 1 1 1
 1 7 19 2 1 1
 1 7 19 3 1 1
 1 7 19 4 1 1
 1 7 20 1 2 1
 1 7 20 2 1 1
 1 7 20 3 2 1
 1 7 20 4 2 1
 1 7 21 1 1 1
 1 7 21 2 1 1
 1 7 21 3 1 1
 1 7 21 4 1 1
 1 7 22 1 1 1
 1 7 22 2 2 1
 1 7 22 3 1 1
 1 7 22 4 2 1
 1 7 23 1 1 1
 1 7 23 2 2 1
 1 7 23 3 2 1
 1 7 23 4 1 1
 1 7 24 1 2 1
 1 7 24 2 2 1
 1 7 24 3 1 1
 1 7 24 4 1 1
 1 7 25 1 2 1
 1 7 25 2 1 1
 1 7 25 3 1 1
 1 7 25 4 1 1
 1 7 26 1 2 1
 1 7 26 2 1 1
 1 7 26 3 1 1
 1 7 26 4 2 1
 1 7 27 1 1 1
 1 7 27 2 2 1
 1 7 27 3 1 1
 1 7 27 4 1 1
 1 7 28 1 1 1
 1 7 28 2 1 1
 1 7 28 3 1 1
 1 7 28 4 2 1
 1 7 29 1 2 1
 1 7 29 2 2 1
 1 7 29 3 1 1
 1 7 29 4 1 1
 1 7 30 1 2 1
 1 7 30 2 2 1
 1 7 30 3 1 1
 1 7 30 4 1 1
 1 7 31 1 2 1
 1 7 31 2 1 1
 1 7 31 3 1 1
 1 7 31 4 1 1
 1 7 32 1 1 1
 1 7 32 2 1 1
 1 7 32 3 2 1
 1 7 32 4 1 1
 1 8 1 1 2 1
 1 8 1 2 1 1
 1 8 1 3 2 1
 1 8 1 4 1 1
 1 8 2 1 1 1
 1 8 2 2 2 1
 1 8 2 3 1 1
 1 8 2 4 1 1
 1 8 3 1 1 1
 1 8 3 2 1 1
 1 8 3 3 1 1
 1 8 3 4 1 1
 1 8 4 1 1 1
 1 8 4 2 1 1
 1 8 4 3 1 1
 1 8 4 4 1 1
 1 8 5 1 1 1
 1 8 5 2 1 1
 1 8 5 3 1 1
 1 8 5 4 2 1
 1 8 6 1 1 1
 1 8 6 2 2 1
 1 8 6 3 1 1
 1 8 6 4 1 1
 1 8 7 1 1 1
 1 8 7 2 2 1
 1 8 7 3 1 1
 1 8 7 4 2 1
 1 8 8 1 1 1
 1 8 8 2 2 1
 1 8 8 3 2 1
 1 8 8 4 1 1
 1 8 9 1 2 1
 1 8 9 2 1 1
 1 8 9 3 1 1
 1 8 9 4 1 1
 1 8 10 1 1 1
 1 8 10 2 1 1
 1 8 10 3 2 1
 1 8 10 4 2 1
 1 8 11 1 1 1
 1 8 11 2 1 1
 1 8 11 3 1 1
 1 8 11 4 1 1
 1 8 12 1 1 1
 1 8 12 2 1 1
 1 8 12 3 2 1
 1 8 12 4 1 1
 1 8 13 1 1 1
 1 8 13 2 2 1
 1 8 13 3 1 1
 1 8 13 4 1 1
 1 8 14 1 2 1
 1 8 14 2 1 1
 1 8 14 3 2 1
 1 8 14 4 1 1
 1 8 15 1 1 1
 1 8 15 2 1 1
 1 8 15 3 2 1
 1 8 15 4 1 1
 1 8 16 1 1 1
 1 8 16 2 2 1
 1 8 16 3 1 1
 1 8 16 4 1 1
 1 8 17 1 1 1
 1 8 17 2 1 1
 1 8 17 3 2 1
 1 8 17 4 2 1
 1 8 18 1 1 1
 1 8 18 2 1 1
 1 8 18 3 2 1
 1 8 18 4 2 1
 1 8 19 1 1 1
 1 8 19 2 1 1
 1 8 19 3 2 1
 1 8 19 4 1 1
 1 8 20 1 2 1
 1 8 20 2 2 1
 1 8 20 3 2 1
 1 8 20 4 2 1
 1 8 21 1 1 1
 1 8 21 2 1 1
 1 8 21 3 1 1
 1 8 21 4 1 1
 1 8 22 1 2 1
 1 8 22 2 1 1
 1 8 22 3 1 1
 1 8 22 4 1 1
 1 8 23 1 1 1
 1 8 23 2 1 1
 1 8 23 3 2 1
 1 8 23 4 1 1
 1 8 24 1 1 1
 1 8 24 2 1 1
 1 8 24 3 1 1
 1 8 24 4 1 1
 1 8 25 1 1 1
 1 8 25 2 2 1
 1 8 25 3 1 1
 1 8 25 4 1 1
 1 8 26 1 2 1
 1 8 26 2 1 1
 1 8 26 3 1 1
 1 8 26 4 1 1
 1 8 27 1 1 1
 1 8 27 2 1 1
 1 8 27 3 1 1
 1 8 27 4 2 1
 1 8 28 1 1 1
 1 8 28 2 2 1
 1 8 28 3 1 1
 1 8 28 4 1 1
 1 8 29 1 1 1
 1 8 29 2 1 1
 1 8 29 3 2 1
 1 8 29 4 1 1
 1 8 30 1 1 1
 1 8 30 2 1 1
 1 8 30 3 2 1
 1 8 30 4 2 1
 1 8 31 1 1 1
 1 8 31 2 1 1
 1 8 31 3 1 1
 1 8 31 4 1 1
 1 8 32 1 1 1
 1 8 32 2 1 1
 1 8 32 3 2 1
 1 8 32 4 1 1
 1 9 1 1 1 1
 1 9 1 2 2 1
 1 9 1 3 1 1
 1 9 1 4 1 1
 1 9 2 1 1 1
 1 9 2 2 1 1
 1 9 2 3 1 1
 1 9 2 4 1 1
 1 9 3 1 2 1
 1 9 3 2 2 1
 1 9 3 3 1 1
 1 9 3 4 1 1
 1 9 4 1 2 1
 1 9 4 2 1 1
 1 9 4 3 1 1
 1 9 4 4 1 1
 1 9 5 1 1 1
 1 9 5 2 2 1
 1 9 5 3 2 1
 1 9 5 4 2 1
 1 9 6 1 2 1
 1 9 6 2 1 1
 1 9 6 3 2 1
 1 9 6 4 1 1
 1 9 7 1 1 1
 1 9 7 2 1 1
 1 9 7 3 2 1
 1 9 7 4 1 1
 1 9 8 1 2 1
 1 9 8 2 1 1
 1 9 8 3 1 1
 1 9 8 4 2 1
 1 9 9 1 1 1
 1 9 9 2 1 1
 1 9 9 3 2 1
 1 9 9 4 2 1
 1 9 10 1 2 1
 1 9 10 2 1 1
 1 9 10 3 1 1
 1 9 10 4 1 1
 1 9 11 1 2 1
 1 9 11 2 1 1
 1 9 11 3 1 1
 1 9 11 4 1 1
 1 9 12 1 1 1
 1 9 12 2 1 1
 1 9 12 3 2 1
 1 9 12 4 1 1
 1 9 13 1 1 1
 1 9 13 2 1 1
 1 9 13 3 1 1
 1 9 13 4 1 1
 1 9 14 1 1 1
 1 9 14 2 1 1
 1 9 14 3 1 1
 1 9 14 4 2 1
 1 9 15 1 1 1
 1 9 15 2 1 1
 1 9 15 3 1 1
 1 9 15 4 2 1
 1 9 16 1 1 1
 1 9 16 2 1 1
 1 9 16 3 1 1
 1 9 16 4 1 1
 1 9 17 1 1 1
 1 9 17 2 1 1
 1 9 17 3 1 1
 1 9 17 4 1 1
 1 9 18 1 1 1
 1 9 18 2 1 1
 1 9 18 3 2 1
 1 9 18 4 1 1
 1 9 19 1 1 1
 1 9 19 2 2 1
 1 9 19 3 2 1
 1 9 19 4 2 1
 1 9 20 1 2 1
 1 9 20 2 2 1
 1 9 20 3 1 1
 1 9 20 4 1 1
 1 9 21 1 1 1
 1 9 21 2 1 1
 1 9 21 3 2 1
 1 9 21 4 1 1
 1 9 22 1 1 1
 1 9 22 2 2 1
 1 9 22 3 1 1
 1 9 22 4 1 1
 1 9 23 1 2 1
 1 9 23 2 1 1
 1 9 23 3 1 1
 1 9 23 4 1 1
 1 9 24 1 1 1
 1 9 24 2 1 1
 1 9 24 3 1 1
 1 9 24 4 2 1
 1 9 25 1 1 1
 1 9 25 2 1 1
 1 9 25 3 1 1
 1 9 25 4 1 1
 1 9 26 1 1 1
 1 9 26 2 2 1
 1 9 26 3 2 1
 1 9 26 4 1 1
 1 9 27 1 1 1
 1 9 27 2 1 1
 1 9 27 3 1 1
 1 9 27 4 1 1
 1 9 28 1 1 1
 1 9 28 2 2 1
 1 9 28 3 1 1
 1 9 28 4 1 1
 1 9 29 1 1 1
 1 9 29 2 1 1
 1 9 29 3 1 1
 1 9 29 4 1 1
 1 9 30 1 1 1
 1 9 30 2 2 1
 1 9 30 3 1 1
 1 9 30 4 2 1
 1 9 31 1 1 1
 1 9 31 2 2 1
 1 9 31 3 2 1
 1 9 31 4 1 1
 1 9 32 1 1 1
 1 9 32 2 1 1
 1 9 32 3 1 1
 1 9 32 4 1 1
 1 10 1 1 1 1
 1 10 1 2 1 1
 1 10 1 3 1 1
 1 10 1 4 1 1
 1 10 2 1 1 1
 1 10 2 2 2 1
 1 10 2 3 1 1
 1 10 2 4 1 1
 1 10 3 1 1 1
 1 10 3 2 1 1
 1 10 3 3 1 1
 1 10 3 4 2 1
 1 10 4 1 2 1
 1 10 4 2 2 1
 1 10 4 3 1 1
 1 10 4 4 1 1
 1 10 5 1 1 1
 1 10 5 2 1 1
 1 10 5 3 1 1
 1 10 5 4 2 1
 1 10 6 1 1 1
 1 10 6 2 1 1
 1 10 6 3 1 1
 1 10 6 4 1 1
 1 10 7 1 1 1
 1 10 7 2 2 1
 1 10 7 3 2 1
 1 10 7 4 2 1
 1 10 8 1 1 1
 1 10 8 2 1 1
 1 10 8 3 1 1
 1 10 8 4 1 1
 1 10 9 1 2 1
 1 10 9 2 1 1
 1 10 9 3 1 1
 1 10 9 4 1 1
 1 10 10 1 1 1
 1 10 10 2 1 1
 1 10 10 3 2 1
 1 10 10 4 1 1
 1 10 11 1 1 1
 1 10 11 2 2 1
 1 10 11 3 1 1
 1 10 11 4 1 1
 1 10 12 1 1 1
 1 10 12 2 2 1
 1 10 12 3 1 1
 1 10 12 4 1 1
 1 10 13 1 2 1
 1 10 13 2 2 1
 1 10 13 3 1 1
 1 10 13 4 1 1
 1 10 14 1 1 1
 1 10 14 2 2 1
 1 10 14 3 1 1
 1 10 14 4 1 1
 1 10 15 1 1 1
 1 10 15 2 1 1
 1 10 15 3 2 1
 1 10 15 4 2 1
 1 10 16 1 1 1
 1 10 16 2 2 1
 1 10 16 3 1 1
 1 10 16 4 2 1
 1 10 17 1 1 1
 1 10 17 2 1 1
 1 10 17 3 2 1
 1 10 17 4 1 1
 1 10 18 1 2 1
 1 10 18 2 1 1
 1 10 18 3 2 1
 1 10 18 4 1 1
 1 10 19 1 1 1
 1 10 19 2 1 1
 1 10 19 3 1 1
 1 10 19 4 1 1
 1 10 20 1 1 1
 1 10 20 2 1 1
 1 10 20 3 2 1
 1 10 20 4 2 1
 1 10 21 1 1 1
 1 10 21 2 1 1
 1 10 21 3 1 1
 1 10 21 4 1 1
 1 10 22 1 1 1
 1 10 22 2 1 1
 1 10 22 3 1 1
 1 10 22 4 2 1
 1 10 23 1 1 1
 1 10 23 2 2 1
 1 10 23 3 1 1
 1 10 23 4 2 1
 1 10 24 1 1 1
 1 10 24 2 1 1
 1 10 24 3 2 1
 1 10 24 4 1 1
 1 10 25 1 1 1
 1 10 25 2 1 1
 1 10 25 3 2 1
 1 10 25 4 2 1
 1 10 26 1 1 1
 1 10 26 2 2 1
 1 10 26 3 1 1
 1 10 26 4 1 1
 1 10 27 1 1 1
 1 10 27 2 2 1
 1 10 27 3 2 1
 1 10 27 4 2 1
 1 10 28 1 2 1
 1 10 28 2 1 1
 1 10 28 3 2 1
 1 10 28 4 1 1
 1 10 29 1 2 1
 1 10 29 2 2 1
 1 10 29 3 1 1
 1 10 29 4 1 1
 1 10 30 1 1 1
 1 10 30 2 2 1
 1 10 30 3 1 1
 1 10 30 4 1 1
 1 10 31 1 1 1
 1 10 31 2 1 1
 1 10 31 3 1 1
 1 10 31 4 2 1
 1 10 32 1 2 1
 1 10 32 2 1 1
 1 10 32 3 1 1
 1 10 32 4 2 1
 1 11 1 1 1 1
 1 11 1 2 2 1
 1 11 1 3 2 1
 1 11 1 4 1 1
 1 11 2 1 1 1
 1 11 2 2 2 1
 1 11 2 3 2 1
 1 11 2 4 1 1
 1 11 3 1 1 1
 1 11 3 2 2 1
 1 11 3 3 1 1
 1 11 3 4 1 1
 1 11 4 1 1 1
 1 11 4 2 2 1
 1 11 4 3 1 1
 1 11 4 4 2 1
 1 11 5 1 1 1
 1 11 5 2 1 1
 1 11 5 3 2 1
 1 11 5 4 1 1
 1 11 6 1 1 1
 1 11 6 2 2 1
 1 11 6 3 2 1
 1 11 6 4 2 1
 1 11 7 1 2 1
 1 11 7 2 1 1
 1 11 7 3 2 1
 1 11 7 4 1 1
 1 11 8 1 1 1
 1 11 8 2 1 1
 1 11 8 3 2 1
 1 11 8 4 2 1
 1 11 9 1 1 1
 1 11 9 2 1 1
 1 11 9 3 2 1
 1 11 9 4 1 1
 1 11 10 1 1 1
 1 11 10 2 1 1
 1 11 10 3 2 1
 1 11 10 4 1 1
 1 11 11 1 2 1
 1 11 11 2 1 1
 1 11 11 3 1 1
 1 11 11 4 2 1
 1 11 12 1 2 1
 1 11 12 2 2 1
 1 11 12 3 1 1
 1 11 12 4 1 1
 1 11 13 1 1 1
 1 11 13 2 1 1
 1 11 13 3 1 1
 1 11 13 4 1 1
 1 11 14 1 1 1
 1 11 14 2 1 1
 1 11 14 3 1 1
 1 11 14 4 1 1
 1 11 15 1 1 1
 1 11 15 2 1 1
 1 11 15 3 1 1
 1 11 15 4 2 1
 1 11 16 1 1 1
 1 11 16 2 2 1
 1 11 16 3 1 1
 1 11 16 4 1 1
 1 11 17 1 1 1
 1 11 17 2 1 1
 1 11 17 3 1 1
 1 11 17 4 1 1
 1 11 18 1 2 1
 1 11 18 2 1 1
 1 11 18 3 2 1
 1 11 18 4 1 1
 1 11 19 1 1 1
 1 11 19 2 1 1
 1 11 19 3 1 1
 1 11 19 4 1 1
 1 11 20 1 1 1
 1 11 20 2 2 1
 1 11 20 3 2 1
 1 11 20 4 1 1
 1 11 21 1 1 1
 1 11 21 2 2 1
 1 11 21 3 1 1
 1 11 21 4 1 1
 1 11 22 1 1 1
 1 11 22 2 2 1
 1 11 22 3 1 1
 1 11 22 4 1 1
 1 11 23 1 1 1
 1 11 23 2 2 1
 1 11 23 3 1 1
 1 11 23 4 1 1
 1 11 24 1 1 1
 1 11 24 2 1 1
 1 11 24 3 2 1
 1 11 24 4 1 1
 1 11 25 1 2 1
 1 11 25 2 1 1
 1 11 25 3 2 1
 1 11 25 4 1 1
 1 11 26 1 1 1
 1 11 26 2 2 1
 1 11 26 3 1 1
 1 11 26 4 1 1
 1 11 27 1 1 1
 1 11 27 2 1 1
 1 11 27 3 1 1
 1 11 27 4 2 1
 1 11 28 1 2 1
 1 11 28 2 1 1
 1 11 28 3 2 1
 1 11 28 4 1 1
 1 11 29 1 1 1
 1 11 29 2 2 1
 1 11 29 3 1 1
 1 11 29 4 2 1
 1 11 30 1 1 1
 1 11 30 2 2 1
 1 11 30 3 1 1
 1 11 30 4 1 1
 1 11 31 1 2 1
 1 11 31 2 1 1
 1 11 31 3 1 1
 1 11 31 4 1 1
 1 11 32 1 2 1
 1 11 32 2 1 1
 1 11 32 3 1 1
 1 11 32 4 2 1
 1 12 1 1 1 1
 1 12 1 2 2 1
 1 12 1 3 2 1
 1 12 1 4 1 1
 1 12 2 1 2 1
 1 12 2 2 2 1
 1 12 2 3 1 1
 1 12 2 4 1 1
 1 12 3 1 1 1
 1 12 3 2 2 1
 1 12 3 3 2 1
 1 12 3 4 2 1
 1 12 4 1 1 1
 1 12 4 2 2 1
 1 12 4 3 1 1
 1 12 4 4 1 1
 1 12 5 1 1 1
 1 12 5 2 1 1
 1 12 5 3 2 1
 1 12 5 4 1 1
 1 12 6 1 1 1
 1 12 6 2 1 1
 1 12 6 3 1 1
 1 12 6 4 1 1
 1 12 7 1 1 1
 1 12 7 2 1 1
 1 12 7 3 1 1
 1 12 7 4 1 1
 1 12 8 1 1 1
 1 12 8 2 2 1
 1 12 8 3 1 1
 1 12 8 4 1 1
 1 12 9 1 2 1
 1 12 9 2 1 1
 1 12 9 3 2 1
 1 12 9 4 1 1
 1 12 10 1 1 1
 1 12 10 2 2 1
 1 12 10 3 2 1
 1 12 10 4 1 1
 1 12 11 1 1 1
 1 12 11 2 2 1
 1 12 11 3 2 1
 1 12 11 4 1 1
 1 12 12 1 2 1
 1 12 12 2 1 1
 1 12 12 3 2 1
 1 12 12 4 2 1
 1 12 13 1 2 1
 1 12 13 2 1 1
 1 12 13 3 1 1
 1 12 13 4 1 1
 1 12 14 1 2 1
 1 12 14 2 2 1
 1 12 14 3 1 1
 1 12 14 4 1 1
 1 12 15 1 1 1
 1 12 15 2 1 1
 1 12 15 3 1 1
 1 12 15 4 2 1
 1 12 16 1 1 1
 1 12 16 2 1 1
 1 12 16 3 1 1
 1 12 16 4 1 1
 1 12 17 1 1 1
 1 12 17 2 1 1
 1 12 17 3 1 1
 1 12 17 4 1 1
 1 12 18 1 1 1
 1 12 18 2 2 1
 1 12 18 3 1 1
 1 12 18 4 2 1
 1 12 19 1 2 1
 1 12 19 2 1 1
 1 12 19 3 1 1
 1 12 19 4 1 1
 1 12 20 1 1 1
 1 12 20 2 1 1
 1 12 20 3 1 1
 1 12 20 4 2 1
 1 12 21 1 1 1
 1 12 21 2 1 1
 1 12 21 3 1 1
 1 12 21 4 1 1
 1 12 22 1 2 1
 1 12 22 2 1 1
 1 12 22 3 1 1
 1 12 22 4 2 1
 1 12 23 1 2 1
 1 12 23 2 2 1
 1 12 23 3 2 1
 1 12 23 4 1 1
 1 12 24 1 1 1
 1 12 24 2 1 1
 1 12 24 3 1 1
 1 12 24 4 2 1
 1 12 25 1 1 1
 1 12 25 2 1 1
 1 12 25 3 1 1
 1 12 25 4 2 1
 1 12 26 1 1 1
 1 12 26 2 2 1
 1 12 26 3 1 1
 1 12 26 4 1 1
 1 12 27 1 2 1
 1 12 27 2 1 1
 1 12 27 3 1 1
 1 12 27 4 1 1
 1 12 28 1 2 1
 1 12 28 2 2 1
 1 12 28 3 2 1
 1 12 28 4 1 1
 1 12 29 1 1 1
 1 12 29 2 2 1
 1 12 29 3 2 1
 1 12 29 4 2 1
 1 12 30 1 1 1
 1 12 30 2 1 1
 1 12 30 3 1 1
 1 12 30 4 2 1
 1 12 31 1 1 1
 1 12 31 2 1 1
 1 12 31 3 1 1
 1 12 31 4 1 1
 1 12 32 1 2 1
 1 12 32 2 2 1
 1 12 32 3 1 1
 1 12 32 4 2 1
 1 13 1 1 1 1
 1 13 1 2 1 1
 1 13 1 3 1 1
 1 13 1 4 1 1
 1 13 2 1 1 1
 1 13 2 2 1 1
 1 13 2 3 1 1
 1 13 2 4 1 1
 1 13 3 1 1 1
 1 13 3 2 2 1
 1 13 3 3 1 1
 1 13 3 4 1 1
 1 13 4 1 1 1
 1 13 4 2 1 1
 1 13 4 3 1 1
 1 13 4 4 1 1
 1 13 5 1 1 1
 1 13 5 2 1 1
 1 13 5 3 1 1
 1 13 5 4 2 1
 1 13 6 1 1 1
 1 13 6 2 1 1
 1 13 6 3 2 1
 1 13 6 4 1 1
 1 13 7 1 2 1
 1 13 7 2 1 1
 1 13 7 3 2 1
 1 13 7 4 2 1
 1 13 8 1 1 1
 1 13 8 2 1 1
 1 13 8 3 1 1
 1 13 8 4 1 1
 1 13 9 1 1 1
 1 13 9 2 1 1
 1 13 9 3 2 1
 1 13 9 4 1 1
 1 13 10 1 2 1
 1 13 10 2 2 1
 1 13 10 3 1 1
 1 13 10 4 1 1
 1 13 11 1 1 1
 1 13 11 2 1 1
 1 13 11 3 1 1
 1 13 11 4 2 1
 1 13 12 1 1 1
 1 13 12 2 1 1
 1 13 12 3 1 1
 1 13 12 4 2 1
 1 13 13 1 2 1
 1 13 13 2 2 1
 1 13 13 3 2 1
 1 13 13 4 2 1
 1 13 14 1 2 1
 1 13 14 2 1 1
 1 13 14 3 1 1
 1 13 14 4 1 1
 1 13 15 1 1 1
 1 13 15 2 1 1
 1 13 15 3 2 1
 1 13 15 4 1 1
 1 13 16 1 2 1
 1 13 16 2 1 1
 1 13 16 3 2 1
 1 13 16 4 1 1
 1 13 17 1 1 1
 1 13 17 2 2 1
 1 13 17 3 1 1
 1 13 17 4 1 1
 1 13 18 1 2 1
 1 13 18 2 1 1
 1 13 18 3 1 1
 1 13 18 4 2 1
 1 13 19 1 1 1
 1 13 19 2 1 1
 1 13 19 3 1 1
 1 13 19 4 1 1
 1 13 20 1 1 1
 1 13 20 2 1 1
 1 13 20 3 2 1
 1 13 20 4 1 1
 1 13 21 1 1 1
 1 13 21 2 1 1
 1 13 21 3 2 1
 1 13 21 4 1 1
 1 13 22 1 1 1
 1 13 22 2 1 1
 1 13 22 3 1 1
 1 13 22 4 2 1
 1 13 23 1 1 1
 1 13 23 2 2 1
 1 13 23 3 2 1
 1 13 23 4 1 1
 1 13 24 1 1 1
 1 13 24 2 1 1
 1 13 24 3 2 1
 1 13 24 4 1 1
 1 13 25 1 2 1
 1 13 25 2 1 1
 1 13 25 3 1 1
 1 13 25 4 1 1
 1 13 26 1 1 1
 1 13 26 2 1 1
 1 13 26 3 2 1
 1 13 26 4 1 1
 1 13 27 1 1 1
 1 13 27 2 1 1
 1 13 27 3 1 1
 1 13 27 4 1 1
 1 13 28 1 1 1
 1 13 28 2 2 1
 1 13 28 3 1 1
 1 13 28 4 2 1
 1 13 29 1 2 1
 1 13 29 2 1 1
 1 13 29 3 2 1
 1 13 29 4 1 1
 1 13 30 1 2 1
 1 13 30 2 1 1
 1 13 30 3 1 1
 1 13 30 4 2 1
 1 13 31 1 1 1
 1 13 31 2 1 1
 1 13 31 3 1 1
 1 13 31 4 1 1
 1 13 32 1 1 1
 1 13 32 2 1 1
 1 13 32 3 1 1
 1 13 32 4 2 1
 1 14 1 1 2 1
 1 14 1 2 2 1
 1 14 1 3 2 1
 1 14 1 4 1 1
 1 14 2 1 1 1
 1 14 2 2 1 1
 1 14 2 3 1 1
 1 14 2 4 1 1
 1 14 3 1 2 1
 1 14 3 2 1 1
 1 14 3 3 2 1
 1 14 3 4 1 1
 1 14 4 1 2 1
 1 14 4 2 2 1
 1 14 4 3 1 1
 1 14 4 4 1 1
 1 14 5 1 1 1
 1 14 5 2 2 1
 1 14 5 3 1 1
 1 14 5 4 1 1
 1 14 6 1 1 1
 1 14 6 2 1 1
 1 14 6 3 2 1
 1 14 6 4 1 1
 1 14 7 1 2 1
 1 14 7 2 1 1
 1 14 7 3 1 1
 1 14 7 4 1 1
 1 14 8 1 1 1
 1 14 8 2 1 1
 1 14 8 3 2 1
 1 14 8 4 1 1
 1 14 9 1 2 1
 1 14 9 2 1 1
 1 14 9 3 1 1
 1 14 9 4 1 1
 1 14 10 1 2 1
 1 14 10 2 2 1
 1 14 10 3 2 1
 1 14 10 4 1 1
 1 14 11 1 1 1
 1 14 11 2 2 1
 1 14 11 3 2 1
 1 14 11 4 2 1
 1 14 12 1 1 1
 1 14 12 2 2 1
 1 14 12 3 1 1
 1 14 12 4 1 1
 1 14 13 1 1 1
 1 14 13 2 1 1
 1 14 13 3 2 1
 1 14 13 4 2 1
 1 14 14 1 1 1
 1 14 14 2 1 1
 1 14 14 3 1 1
 1 14 14 4 2 1
 1 14 15 1 2 1
 1 14 15 2 1 1
 1 14 15 3 1 1
 1 14 15 4 1 1
 1 14 16 1 2 1
 1 14 16 2 1 1
 1 14 16 3 1 1
 1 14 16 4 1 1
 1 14 17 1 2 1
 1 14 17 2 1 1
 1 14 17 3 1 1
 1 14 17 4 1 1
 1 14 18 1 1 1
 1 14 18 2 2 1
 1 14 18 3 1 1
 1 14 18 4 1 1
 1 14 19 1 1 1
 1 14 19 2 2 1
 1 14 19 3 1 1
 1 14 19 4 1 1
 1 14 20 1 1 1
 1 14 20 2 2 1
 1 14 20 3 1 1
 1 14 20 4 1 1
 1 14 21 1 2 1
 1 14 21 2 1 1
 1 14 21 3 1 1
 1 14 21 4 2 1
 1 14 22 1 1 1
 1 14 22 2 1 1
 1 14 22 3 1 1
 1 14 22 4 1 1
 1 14 23 1 1 1
 1 14 23 2 2 1
 1 14 23 3 1 1
 1 14 23 4 1 1
 1 14 24 1 1 1
 1 14 24 2 2 1
 1 14 24 3 2 1
 1 14 24 4 1 1
 1 14 25 1 2 1
 1 14 25 2 1 1
 1 14 25 3 2 1
 1 14 25 4 1 1
 1 14 26 1 1 1
 1 14 26 2 1 1
 1 14 26 3 1 1
 1 14 26 4 1 1
 1 14 27 1 1 1
 1 14 27 2 1 1
 1 14 27 3 1 1
 1 14 27 4 1 1
 1 14 28 1 1 1
 1 14 28 2 1 1
 1 14 28 3 1 1
 1 14 28 4 2 1
 1 14 29 1 2 1
 1 14 29 2 2 1
 1 14 29 3 1 1
 1 14 29 4 1 1
 1 14 30 1 1 1
 1 14 30 2 1 1
 1 14 30 3 1 1
 1 14 30 4 1 1
 1 14 31 1 1 1
 1 14 31 2 2 1
 1 14 31 3 1 1
 1 14 31 4 1 1
 1 14 32 1 2 1
 1 14 32 2 1 1
 1 14 32 3 2 1
 1 14 32 4 1 1
 1 15 1 1 1 1
 1 15 1 2 1 1
 1 15 1 3 1 1
 1 15 1 4 1 1
 1 15 2 1 2 1
 1 15 2 2 2 1
 1 15 2 3 1 1
 1 15 2 4 1 1
 1 15 3 1 1 1
 1 15 3 2 1 1
 1 15 3 3 1 1
 1 15 3 4 1 1
 1 15 4 1 1 1
 1 15 4 2 1 1
 1 15 4 3 1 1
 1 15 4 4 1 1
 1 15 5 1 1 1
 1 15 5 2 1 1
 1 15 5 3 1 1
 1 15 5 4 1 1
 1 15 6 1 1 1
 1 15 6 2 1 1
 1 15 6 3 1 1
 1 15 6 4 1 1
 1 15 7 1 1 1
 1 15 7 2 2 1
 1 15 7 3 1 1
 1 15 7 4 1 1
 1 15 8 1 2 1
 1 15 8 2 1 1
 1 15 8 3 2 1
 1 15 8 4 2 1
 1 15 9 1 2 1
 1 15 9 2 2 1
 1 15 9 3 1 1
 1 15 9 4 1 1
 1 15 10 1 2 1
 1 15 10 2 1 1
 1 15 10 3 1 1
 1 15 10 4 1 1
 1 15 11 1 1 1
 1 15 11 2 1 1
 1 15 11 3 1 1
 1 15 11 4 1 1
 1 15 12 1 1 1
 1 15 12 2 1 1
 1 15 12 3 1 1
 1 15 12 4 2 1
 1 15 13 1 1 1
 1 15 13 2 1 1
 1 15 13 3 2 1
 1 15 13 4 1 1
 1 15 14 1 1 1
 1 15 14 2 2 1
 1 15 14 3 1 1
 1 15 14 4 1 1
 1 15 15 1 1 1
 1 15 15 2 1 1
 1 15 15 3 1 1
 1 15 15 4 1 1
 1 15 16 1 1 1
 1 15 16 2 1 1
 1 15 16 3 2 1
 1 15 16 4 2 1
 1 15 17 1 2 1
 1 15 17 2 2 1
 1 15 17 3 1 1
 1 15 17 4 2 1
 1 15 18 1 2 1
 1 15 18 2 1 1
 1 15 18 3 1 1
 1 15 18 4 1 1
 1 15 19 1 1 1
 1 15 19 2 1 1
 1 15 19 3 1 1
 1 15 19 4 2 1
 1 15 20 1 2 1
 1 15 20 2 2 1
 1 15 20 3 1 1
 1 15 20 4 2 1
 1 15 21 1 2 1
 1 15 21 2 2 1
 1 15 21 3 1 1
 1 15 21 4 2 1
 1 15 22 1 1 1
 1 15 22 2 1 1
 1 15 22 3 2 1
 1 15 22 4 2 1
 1 15 23 1 2 1
 1 15 23 2 2 1
 1 15 23 3 1 1
 1 15 23 4 1 1
 1 15 24 1 1 1
 1 15 24 2 1 1
 1 15 24 3 2 1
 1 15 24 4 1 1
 1 15 25 1 2 1
 1 15 25 2 2 1
 1 15 25 3 2 1
 1 15 25 4 2 1
 1 15 26 1 1 1
 1 15 26 2 1 1
 1 15 26 3 1 1
 1 15 26 4 1 1
 1 15 27 1 1 1
 1 15 27 2 2 1
 1 15 27 3 1 1
 1 15 27 4 1 1
 1 15 28 1 2 1
 1 15 28 2 1 1
 1 15 28 3 1 1
 1 15 28 4 1 1
 1 15 29 1 1 1
 1 15 29 2 1 1
 1 15 29 3 2 1
 1 15 29 4 1 1
 1 15 30 1 1 1
 1 15 30 2 2 1
 1 15 30 3 1 1
 1 15 30 4 2 1
 1 15 31 1 1 1
 1 15 31 2 2 1
 1 15 31 3 1 1
 1 15 31 4 2 1
 1 15 32 1 2 1
 1 15 32 2 1 1
 1 15 32 3 1 1
 1 15 32 4 1 1
 1 16 1 1 2 1
 1 16 1 2 1 1
 1 16 1 3 1 1
 1 16 1 4 2 1
 1 16 2 1 1 1
 1 16 2 2 1 1
 1 16 2 3 1 1
 1 16 2 4 2 1
 1 16 3 1 1 1
 1 16 3 2 2 1
 1 16 3 3 2 1
 1 16 3 4 2 1
 1 16 4 1 1 1
 1 16 4 2 1 1
 1 16 4 3 1 1
 1 16 4 4 2 1
 1 16 5 1 1 1
 1 16 5 2 2 1
 1 16 5 3 1 1
 1 16 5 4 1 1
 1 16 6 1 2 1
 1 16 6 2 1 1
 1 16 6 3 1 1
 1 16 6 4 1 1
 1 16 7 1 2 1
 1 16 7 2 2 1
 1 16 7 3 1 1
 1 16 7 4 1 1
 1 16 8 1 1 1
 1 16 8 2 1 1
 1 16 8 3 2 1
 1 16 8 4 1 1
 1 16 9 1 2 1
 1 16 9 2 2 1
 1 16 9 3 2 1
 1 16 9 4 2 1
 1 16 10 1 2 1
 1 16 10 2 1 1
 1 16 10 3 1 1
 1 16 10 4 1 1
 1 16 11 1 1 1
 1 16 11 2 1 1
 1 16 11 3 1 1
 1 16 11 4 2 1
 1 16 12 1 2 1
 1 16 12 2 1 1
 1 16 12 3 1 1
 1 16 12 4 1 1
 1 16 13 1 1 1
 1 16 13 2 1 1
 1 16 13 3 1 1
 1 16 13 4 1 1
 1 16 14 1 2 1
 1 16 14 2 1 1
 1 16 14 3 1 1
 1 16 14 4 2 1
 1 16 15 1 2 1
 1 16 15 2 1 1
 1 16 15 3 2 1
 1 16 15 4 1 1
 1 16 16 1 1 1
 1 16 16 2 1 1
 1 16 16 3 2 1
 1 16 16 4 1 1
 1 16 17 1 1 1
 1 16 17 2 1 1
 1 16 17 3 2 1
 1 16 17 4 1 1
 1 16 18 1 1 1
 1 16 18 2 1 1
 1 16 18 3 2 1
 1 16 18 4 2 1
 1 16 19 1 2 1
 1 16 19 2 2 1
 1 16 19 3 2 1
 1 16 19 4 1 1
 1 16 20 1 1 1
 1 16 20 2 2 1
 1 16 20 3 2 1
 1 16 20 4 1 1
 1 16 21 1 1 1
 1 16 21 2 2 1
 1 16 21 3 2 1
 1 16 21 4 2 1
 1 16 22 1 2 1
 1 16 22 2 1 1
 1 16 22 3 1 1
 1 16 22 4 1 1
 1 16 23 1 2 1
 1 16 23 2 1 1
 1 16 23 3 2 1
 1 16 23 4 1 1
 1 16 24 1 1 1
 1 16 24 2 2 1
 1 16 24 3 2 1
 1 16 24 4 1 1
 1 16 25 1 1 1
 1 16 25 2 1 1
 1 16 25 3 1 1
 1 16 25 4 1 1
 1 16 26 1 1 1
 1 16 26 2 1 1
 1 16 26 3 1 1
 1 16 26 4 2 1
 1 16 27 1 2 1
 1 16 27 2 2 1
 1 16 27 3 2 1
 1 16 27 4 1 1
 1 16 28 1 1 1
 1 16 28 2 1 1
 1 16 28 3 1 1
 1 16 28 4 1 1
 1 16 29 1 1 1
 1 16 29 2 1 1
 1 16 29 3 2 1
 1 16 29 4 2 1
 1 16 30 1 1 1
 1 16 30 2 2 1
 1 16 30 3 1 1
 1 16 30 4 1 1
 1 16 31 1 1 1
 1 16 31 2 2 1
 1 16 31 3 1 1
 1 16 31 4 1 1
 1 16 32 1 1 1
 1 16 32 2 2 1
 1 16 32 3 1 1
 1 16 32 4 2 1
 1 17 1 1 2 1
 1 17 1 2 1 1
 1 17 1 3 1 1
 1 17 1 4 2 1
 1 17 2 1 1 1
 1 17 2 2 1 1
 1 17 2 3 1 1
 1 17 2 4 1 1
 1 17 3 1 1 1
 1 17 3 2 2 1
 1 17 3 3 2 1
 1 17 3 4 2 1
 1 17 4 1 1 1
 1 17 4 2 1 1
 1 17 4 3 2 1
 1 17 4 4 2 1
 1 17 5 1 1 1
 1 17 5 2 1 1
 1 17 5 3 1 1
 1 17 5 4 1 1
 1 17 6 1 1 1
 1 17 6 2 1 1
 1 17 6 3 1 1
 1 17 6 4 1 1
 1 17 7 1 2 1
 1 17 7 2 1 1
 1 17 7 3 1 1
 1 17 7 4 1 1
 1 17 8 1 1 1
 1 17 8 2 1 1
 1 17 8 3 1 1
 1 17 8 4 1 1
 1 17 9 1 1 1
 1 17 9 2 1 1
 1 17 9 3 1 1
 1 17 9 4 1 1
 1 17 10 1 2 1
 1 17 10 2 1 1
 1 17 10 3 1 1
 1 17 10 4 1 1
 1 17 11 1 1 1
 1 17 11 2 1 1
 1 17 11 3 1 1
 1 17 11 4 2 1
 1 17 12 1 1 1
 1 17 12 2 1 1
 1 17 12 3 1 1
 1 17 12 4 1 1
 1 17 13 1 1 1
 1 17 13 2 1 1
 1 17 13 3 1 1
 1 17 13 4 2 1
 1 17 14 1 1 1
 1 17 14 2 2 1
 1 17 14 3 1 1
 1 17 14 4 1 1
 1 17 15 1 1 1
 1 17 15 2 1 1
 1 17 15 3 1 1
 1 17 15 4 1 1
 1 17 16 1 1 1
 1 17 16 2 2 1
 1 17 16 3 1 1
 1 17 16 4 1 1
 1 17 17 1 1 1
 1 17 17 2 2 1
 1 17 17 3 2 1
 1 17 17 4 1 1
 1 17 18 1 1 1
 1 17 18 2 2 1
 1 17 18 3 1 1
 1 17 18 4 1 1
 1 17 19 1 1 1
 1 17 19 2 1 1
 1 17 19 3 1 1
 1 17 19 4 1 1
 1 17 20 1 1 1
 1 17 20 2 2 1
 1 17 20 3 1 1
 1 17 20 4 2 1
 1 17 21 1 1 1
 1 17 21 2 1 1
 1 17 21 3 1 1
 1 17 21 4 1 1
 1 17 22 1 1 1
 1 17 22 2 1 1
 1 17 22 3 1 1
 1 17 22 4 1 1
 1 17 23 1 1 1
 1 17 23 2 1 1
 1 17 23 3 2 1
 1 17 23 4 1 1
 1 17 24 1 1 1
 1 17 24 2 1 1
 1 17 24 3 1 1
 1 17 24 4 2 1
 1 17 25 1 1 1
 1 17 25 2 1 1
 1 17 25 3 2 1
 1 17 25 4 2 1
 1 17 26 1 2 1
 1 17 26 2 1 1
 1 17 26 3 2 1
 1 17 26 4 1 1
 1 17 27 1 2 1
 1 17 27 2 1 1
 1 17 27 3 1 1
 1 17 27 4 1 1
 1 17 28 1 1 1
 1 17 28 2 1 1
 1 17 28 3 2 1
 1 17 28 4 2 1
 1 17 29 1 2 1
 1 17 29 2 1 1
 1 17 29 3 2 1
 1 17 29 4 1 1
 1 17 30 1 1 1
 1 17 30 2 1 1
 1 17 30 3 2 1
 1 17 30 4 1 1
 1 17 31 1 1 1
 1 17 31 2 2 1
 1 17 31 3 1 1
 1 17 31 4 2 1
 1 17 32 1 1 1
 1 17 32 2 1 1
 1 17 32 3 1 1
 1 17 32 4 2 1
 1 18 1 1 2 1
 1 18 1 2 2 1
 1 18 1 3 1 1
 1 18 1 4 1 1
 1 18 2 1 1 1
 1 18 2 2 1 1
 1 18 2 3 1 1
 1 18 2 4 1 1
 1 18 3 1 2 1
 1 18 3 2 1 1
 1 18 3 3 2 1
 1 18 3 4 1 1
 1 18 4 1 1 1
 1 18 4 2 1 1
 1 18 4 3 1 1
 1 18 4 4 2 1
 1 18 5 1 1 1
 1 18 5 2 2 1
 1 18 5 3 2 1
 1 18 5 4 1 1
 1 18 6 1 1 1
 1 18 6 2 2 1
 1 18 6 3 1 1
 1 18 6 4 1 1
 1 18 7 1 2 1
 1 18 7 2 2 1
 1 18 7 3 1 1
 1 18 7 4 1 1
 1 18 8 1 1 1
 1 18 8 2 2 1
 1 18 8 3 1 1
 1 18 8 4 1 1
 1 18 9 1 1 1
 1 18 9 2 2 1
 1 18 9 3 1 1
 1 18 9 4 2 1
 1 18 10 1 2 1
 1 18 10 2 2 1
 1 18 10 3 1 1
 1 18 10 4 2 1
 1 18 11 1 1 1
 1 18 11 2 2 1
 1 18 11 3 2 1
 1 18 11 4 1 1
 1 18 12 1 2 1
 1 18 12 2 1 1
 1 18 12 3 2 1
 1 18 12 4 1 1
 1 18 13 1 1 1
 1 18 13 2 2 1
 1 18 13 3 2 1
 1 18 13 4 2 1
 1 18 14 1 2 1
 1 18 14 2 1 1
 1 18 14 3 1 1
 1 18 14 4 1 1
 1 18 15 1 2 1
 1 18 15 2 1 1
 1 18 15 3 1 1
 1 18 15 4 1 1
 1 18 16 1 1 1
 1 18 16 2 2 1
 1 18 16 3 2 1
 1 18 16 4 2 1
 1 18 17 1 1 1
 1 18 17 2 1 1
 1 18 17 3 1 1
 1 18 17 4 1 1
 1 18 18 1 1 1
 1 18 18 2 1 1
 1 18 18 3 1 1
 1 18 18 4 1 1
 1 18 19 1 2 1
 1 18 19 2 1 1
 1 18 19 3 2 1
 1 18 19 4 1 1
 1 18 20 1 2 1
 1 18 20 2 1 1
 1 18 20 3 2 1
 1 18 20 4 1 1
 1 18 21 1 1 1
 1 18 21 2 1 1
 1 18 21 3 1 1
 1 18 21 4 1 1
 1 18 22 1 1 1
 1 18 22 2 2 1
 1 18 22 3 1 1
 1 18 22 4 1 1
 1 18 23 1 1 1
 1 18 23 2 1 1
 1 18 23 3 1 1
 1 18 23 4 1 1
 1 18 24 1 2 1
 1 18 24 2 1 1
 1 18 24 3 2 1
 1 18 24 4 1 1
 1 18 25 1 1 1
 1 18 25 2 1 1
 1 18 25 3 1 1
 1 18 25 4 1 1
 1 18 26 1 2 1
 1 18 26 2 1 1
 1 18 26 3 1 1
 1 18 26 4 2 1
 1 18 27 1 2 1
 1 18 27 2 1 1
 1 18 27 3 2 1
 1 18 27 4 1 1
 1 18 28 1 1 1
 1 18 28 2 1 1
 1 18 28 3 1 1
 1 18 28 4 1 1
 1 18 29 1 1 1
 1 18 29 2 1 1
 1 18 29 3 1 1
 1 18 29 4 1 1
 1 18 30 1 1 1
 1 18 30 2 2 1
 1 18 30 3 1 1
 1 18 30 4 1 1
 1 18 31 1 1 1
 1 18 31 2 2 1
 1 18 31 3 1 1
 1 18 31 4 1 1
 1 18 32 1 1 1
 1 18 32 2 2 1
 1 18 32 3 1 1
 1 18 32 4 1 1
 1 19 1 1 1 1
 1 19 1 2 1 1
 1 19 1 3 1 1
 1 19 1 4 1 1
 1 19 2 1 2 1
 1 19 2 2 2 1
 1 19 2 3 2 1
 1 19 2 4 1 1
 1 19 3 1 1 1
 1 19 3 2 1 1
 1 19 3 3 2 1
 1 19 3 4 1 1
 1 19 4 1 1 1
 1 19 4 2 1 1
 1 19 4 3 1 1
 1 19 4 4 1 1
 1 19 5 1 1 1
 1 19 5 2 2 1
 1 19 5 3 2 1
 1 19 5 4 1 1
 1 19 6 1 1 1
 1 19 6 2 2 1
 1 19 6 3 1 1
 1 19 6 4 2 1
 1 19 7 1 1 1
 1 19 7 2 2 1
 1 19 7 3 1 1
 1 19 7 4 1 1
 1 19 8 1 1 1
 1 19 8 2 1 1
 1 19 8 3 1 1
 1 19 8 4 1 1
 1 19 9 1 1 1
 1 19 9 2 2 1
 1 19 9 3 1 1
 1 19 9 4 2 1
 1 19 10 1 2 1
 1 19 10 2 1 1
 1 19 10 3 1 1
 1 19 10 4 1 1
 1 19 11 1 1 1
 1 19 11 2 2 1
 1 19 11 3 1 1
 1 19 11 4 1 1
 1 19 12 1 2 1
 1 19 12 2 1 1
 1 19 12 3 1 1
 1 19 12 4 2 1
 1 19 13 1 1 1
 1 19 13 2 1 1
 1 19 13 3 2 1
 1 19 13 4 1 1
 1 19 14 1 2 1
 1 19 14 2 1 1
 1 19 14 3 1 1
 1 19 14 4 1 1
 1 19 15 1 1 1
 1 19 15 2 2 1
 1 19 15 3 1 1
 1 19 15 4 2 1
 1 19 16 1 1 1
 1 19 16 2 1 1
 1 19 16 3 1 1
 1 19 16 4 2 1
 1 19 17 1 2 1
 1 19 17 2 1 1
 1 19 17 3 1 1
 1 19 17 4 1 1
 1 19 18 1 1 1
 1 19 18 2 1 1
 1 19 18 3 2 1
 1 19 18 4 2 1
 1 19 19 1 1 1
 1 19 19 2 1 1
 1 19 19 3 1 1
 1 19 19 4 1 1
 1 19 20 1 2 1
 1 19 20 2 1 1
 1 19 20 3 2 1
 1 19 20 4 1 1
 1 19 21 1 1 1
 1 19 21 2 1 1
 1 19 21 3 1 1
 1 19 21 4 1 1
 1 19 22 1 1 1
 1 19 22 2 1 1
 1 19 22 3 2 1
 1 19 22 4 2 1
 1 19 23 1 1 1
 1 19 23 2 1 1
 1 19 23 3 2 1
 1 19 23 4 1 1
 1 19 24 1 1 1
 1 19 24 2 2 1
 1 19 24 3 1 1
 1 19 24 4 1 1
 1 19 25 1 2 1
 1 19 25 2 1 1
 1 19 25 3 1 1
 1 19 25 4 2 1
 1 19 26 1 1 1
 1 19 26 2 2 1
 1 19 26 3 1 1
 1 19 26 4 2 1
 1 19 27 1 1 1
 1 19 27 2 2 1
 1 19 27 3 1 1
 1 19 27 4 1 1
 1 19 28 1 1 1
 1 19 28 2 1 1
 1 19 28 3 2 1
 1 19 28 4 2 1
 1 19 29 1 1 1
 1 19 29 2 1 1
 1 19 29 3 1 1
 1 19 29 4 1 1
 1 19 30 1 2 1
 1 19 30 2 1 1
 1 19 30 3 2 1
 1 19 30 4 1 1
 1 19 31 1 1 1
 1 19 31 2 1 1
 1 19 31 3 2 1
 1 19 31 4 1 1
 1 19 32 1 1 1
 1 19 32 2 1 1
 1 19 32 3 2 1
 1 19 32 4 1 1
 1 20 1 1 2 1
 1 20 1 2 2 1
 1 20 1 3 1 1
 1 20 1 4 1 1
 1 20 2 1 2 1
 1 20 2 2 2 1
 1 20 2 3 1 1
 1 20 2 4 1 1
 1 20 3 1 1 1
 1 20 3 2 1 1
 1 20 3 3 2 1
 1 20 3 4 1 1
 1 20 4 1 1 1
 1 20 4 2 1 1
 1 20 4 3 1 1
 1 20 4 4 2 1
 1 20 5 1 1 1
 1 20 5 2 1 1
 1 20 5 3 1 1
 1 20 5 4 1 1
 1 20 6 1 2 1
 1 20 6 2 2 1
 1 20 6 3 1 1
 1 20 6 4 1 1
 1 20 7 1 2 1
 1 20 7 2 1 1
 1 20 7 3 1 1
 1 20 7 4 2 1
 1 20 8 1 1 1
 1 20 8 2 1 1
 1 20 8 3 1 1
 1 20 8 4 2 1
 1 20 9 1 1 1
 1 20 9 2 1 1
 1 20 9 3 1 1
 1 20 9 4 1 1
 1 20 10 1 1 1
 1 20 10 2 2 1
 1 20 10 3 1 1
 1 20 10 4 1 1
 1 20 11 1 1 1
 1 20 11 2 2 1
 1 20 11 3 1 1
 1 20 11 4 1 1
 1 20 12 1 2 1
 1 20 12 2 1 1
 1 20 12 3 1 1
 1 20 12 4 2 1
 1 20 13 1 2 1
 1 20 13 2 1 1
 1 20 13 3 1 1
 1 20 13 4 2 1
 1 20 14 1 1 1
 1 20 14 2 1 1
 1 20 14 3 1 1
 1 20 14 4 1 1
 1 20 15 1 1 1
 1 20 15 2 2 1
 1 20 15 3 1 1
 1 20 15 4 1 1
 1 20 16 1 2 1
 1 20 16 2 1 1
 1 20 16 3 2 1
 1 20 16 4 1 1
 1 20 17 1 1 1
 1 20 17 2 1 1
 1 20 17 3 1 1
 1 20 17 4 2 1
 1 20 18 1 1 1
 1 20 18 2 1 1
 1 20 18 3 1 1
 1 20 18 4 1 1
 1 20 19 1 1 1
 1 20 19 2 1 1
 1 20 19 3 1 1
 1 20 19 4 1 1
 1 20 20 1 1 1
 1 20 20 2 2 1
 1 20 20 3 1 1
 1 20 20 4 2 1
 1 20 21 1 2 1
 1 20 21 2 1 1
 1 20 21 3 1 1
 1 20 21 4 1 1
 1 20 22 1 1 1
 1 20 22 2 1 1
 1 20 22 3 1 1
 1 20 22 4 1 1
 1 20 23 1 1 1
 1 20 23 2 1 1
 1 20 23 3 2 1
 1 20 23 4 1 1
 1 20 24 1 1 1
 1 20 24 2 2 1
 1 20 24 3 1 1
 1 20 24 4 1 1
 1 20 25 1 1 1
 1 20 25 2 1 1
 1 20 25 3 1 1
 1 20 25 4 1 1
 1 20 26 1 2 1
 1 20 26 2 1 1
 1 20 26 3 1 1
 1 20 26 4 1 1
 1 20 27 1 1 1
 1 20 27 2 2 1
 1 20 27 3 1 1
 1 20 27 4 2 1
 1 20 28 1 2 1
 1 20 28 2 2 1
 1 20 28 3 1 1
 1 20 28 4 2 1
 1 20 29 1 1 1
 1 20 29 2 1 1
 1 20 29 3 1 1
 1 20 29 4 1 1
 1 20 30 1 1 1
 1 20 30 2 1 1
 1 20 30 3 1 1
 1 20 30 4 1 1
 1 20 31 1 2 1
 1 20 31 2 2 1
 1 20 31 3 1 1
 1 20 31 4 2 1
 1 20 32 1 1 1
 1 20 32 2 1 1
 1 20 32 3 1 1
 1 20 32 4 1 1
 1 21 1 1 1 1
 1 21 1 2 1 1
 1 21 1 3 1 1
 1 21 1 4 1 1
 1 21 2 1 1 1
 1 21 2 2 1 1
 1 21 2 3 1 1
 1 21 2 4 2 1
 1 21 3 1 1 1
 1 21 3 2 1 1
 1 21 3 3 1 1
 1 21 3 4 2 1
 1 21 4 1 1 1
 1 21 4 2 1 1
 1 21 4 3 1 1
 1 21 4 4 1 1
 1 21 5 1 2 1
 1 21 5 2 2 1
 1 21 5 3 2 1
 1 21 5 4 1 1
 1 21 6 1 1 1
 1 21 6 2 1 1
 1 21 6 3 1 1
 1 21 6 4 1 1
 1 21 7 1 2 1
 1 21 7 2 1 1
 1 21 7 3 1 1
 1 21 7 4 2 1
 1 21 8 1 2 1
 1 21 8 2 1 1
 1 21 8 3 1 1
 1 21 8 4 1 1
 1 21 9 1 1 1
 1 21 9 2 1 1
 1 21 9 3 1 1
 1 21 9 4 1 1
 1 21 10 1 1 1
 1 21 10 2 1 1
 1 21 10 3 1 1
 1 21 10 4 1 1
 1 21 11 1 1 1
 1 21 11 2 2 1
 1 21 11 3 1 1
 1 21 11 4 1 1
 1 21 12 1 2 1
 1 21 12 2 1 1
 1 21 12 3 2 1
 1 21 12 4 1 1
 1 21 13 1 1 1
 1 21 13 2 1 1
 1 21 13 3 1 1
 1 21 13 4 1 1
 1 21 14 1 1 1
 1 21 14 2 2 1
 1 21 14 3 1 1
 1 21 14 4 1 1
 1 21 15 1 1 1
 1 21 15 2 2 1
 1 21 15 3 2 1
 1 21 15 4 2 1
 1 21 16 1 2 1
 1 21 16 2 1 1
 1 21 16 3 1 1
 1 21 16 4 2 1
 1 21 17 1 1 1
 1 21 17 2 1 1
 1 21 17 3 1 1
 1 21 17 4 1 1
 1 21 18 1 1 1
 1 21 18 2 1 1
 1 21 18 3 1 1
 1 21 18 4 2 1
 1 21 19 1 1 1
 1 21 19 2 1 1
 1 21 19 3 1 1
 1 21 19 4 2 1
 1 21 20 1 2 1
 1 21 20 2 2 1
 1 21 20 3 2 1
 1 21 20 4 2 1
 1 21 21 1 1 1
 1 21 21 2 1 1
 1 21 21 3 2 1
 1 21 21 4 1 1
 1 21 22 1 2 1
 1 21 22 2 2 1
 1 21 22 3 1 1
 1 21 22 4 1 1
 1 21 23 1 1 1
 1 21 23 2 2 1
 1 21 23 3 1 1
 1 21 23 4 2 1
 1 21 24 1 1 1
 1 21 24 2 1 1
 1 21 24 3 1 1
 1 21 24 4 2 1
 1 21 25 1 2 1
 1 21 25 2 1 1
 1 21 25 3 1 1
 1 21 25 4 1 1
 1 21 26 1 1 1
 1 21 26 2 1 1
 1 21 26 3 1 1
 1 21 26 4 2 1
 1 21 27 1 2 1
 1 21 27 2 2 1
 1 21 27 3 2 1
 1 21 27 4 1 1
 1 21 28 1 2 1
 1 21 28 2 2 1
 1 21 28 3 1 1
 1 21 28 4 2 1
 1 21 29 1 1 1
 1 21 29 2 1 1
 1 21 29 3 2 1
 1 21 29 4 2 1
 1 21 30 1 1 1
 1 21 30 2 1 1
 1 21 30 3 2 1
 1 21 30 4 1 1
 1 21 31 1 1 1
 1 21 31 2 1 1
 1 21 31 3 2 1
 1 21 31 4 1 1
 1 21 32 1 1 1
 1 21 32 2 1 1
 1 21 32 3 1 1
 1 21 32 4 1 1
 1 22 1 1 1 1
 1 22 1 2 2 1
 1 22 1 3 2 1
 1 22 1 4 1 1
 1 22 2 1 1 1
 1 22 2 2 1 1
 1 22 2 3 1 1
 1 22 2 4 2 1
 1 22 3 1 1 1
 1 22 3 2 1 1
 1 22 3 3 1 1
 1 22 3 4 1 1
 1 22 4 1 1 1
 1 22 4 2 1 1
 1 22 4 3 1 1
 1 22 4 4 1 1
 1 22 5 1 2 1
 1 22 5 2 2 1
 1 22 5 3 1 1
 1 22 5 4 2 1
 1 22 6 1 1 1
 1 22 6 2 1 1
 1 22 6 3 1 1
 1 22 6 4 1 1
 1 22 7 1 1 1
 1 22 7 2 2 1
 1 22 7 3 1 1
 1 22 7 4 1 1
 1 22 8 1 1 1
 1 22 8 2 2 1
 1 22 8 3 1 1
 1 22 8 4 1 1
 1 22 9 1 1 1
 1 22 9 2 1 1
 1 22 9 3 1 1
 1 22 9 4 1 1
 1 22 10 1 2 1
 1 22 10 2 1 1
 1 22 10 3 2 1
 1 22 10 4 2 1
 1 22 11 1 1 1
 1 22 11 2 1 1
 1 22 11 3 1 1
 1 22 11 4 1 1
 1 22 12 1 1 1
 1 22 12 2 2 1
 1 22 12 3 1 1
 1 22 12 4 1 1
 1 22 13 1 1 1
 1 22 13 2 1 1
 1 22 13 3 1 1
 1 22 13 4 2 1
 1 22 14 1 1 1
 1 22 14 2 2 1
 1 22 14 3 2 1
 1 22 14 4 1 1
 1 22 15 1 2 1
 1 22 15 2 1 1
 1 22 15 3 1 1
 1 22 15 4 1 1
 1 22 16 1 2 1
 1 22 16 2 1 1
 1 22 16 3 2 1
 1 22 16 4 2 1
 1 22 17 1 1 1
 1 22 17 2 1 1
 1 22 17 3 1 1
 1 22 17 4 1 1
 1 22 18 1 2 1
 1 22 18 2 2 1
 1 22 18 3 1 1
 1 22 18 4 2 1
 1 22 19 1 2 1
 1 22 19 2 2 1
 1 22 19 3 2 1
 1 22 19 4 1 1
 1 22 20 1 1 1
 1 22 20 2 1 1
 1 22 20 3 2 1
 1 22 20 4 1 1
 1 22 21 1 1 1
 1 22 21 2 2 1
 1 22 21 3 2 1
 1 22 21 4 1 1
 1 22 22 1 1 1
 1 22 22 2 2 1
 1 22 22 3 1 1
 1 22 22 4 1 1
 1 22 23 1 1 1
 1 22 23 2 2 1
 1 22 23 3 1 1
 1 22 23 4 2 1
 1 22 24 1 1 1
 1 22 24 2 2 1
 1 22 24 3 2 1
 1 22 24 4 1 1
 1 22 25 1 2 1
 1 22 25 2 2 1
 1 22 25 3 1 1
 1 22 25 4 1 1
 1 22 26 1 2 1
 1 22 26 2 1 1
 1 22 26 3 1 1
 1 22 26 4 2 1
 1 22 27 1 1 1
 1 22 27 2 1 1
 1 22 27 3 2 1
 1 22 27 4 1 1
 1 22 28 1 1 1
 1 22 28 2 2 1
 1 22 28 3 1 1
 1 22 28 4 1 1
 1 22 29 1 1 1
 1 22 29 2 2 1
 1 22 29 3 1 1
 1 22 29 4 2 1
 1 22 30 1 1 1
 1 22 30 2 1 1
 1 22 30 3 1 1
 1 22 30 4 1 1
 1 22 31 1 1 1
 1 22 31 2 1 1
 1 22 31 3 1 1
 1 22 31 4 1 1
 1 22 32 1 1 1
 1 22 32 2 2 1
 1 22 32 3 1 1
 1 22 32 4 1 1
 1 23 1 1 2 1
 1 23 1 2 1 1
 1 23 1 3 1 1
 1 23 1 4 1 1
 1 23 2 1 2 1
 1 23 2 2 2 1
 1 23 2 3 2 1
 1 23 2 4 2 1
 1 23 3 1 2 1
 1 23 3 2 1 1
 1 23 3 3 1 1
 1 23 3 4 1 1
 1 23 4 1 1 1
 1 23 4 2 1 1
 1 23 4 3 2 1
 1 23 4 4 1 1
 1 23 5 1 2 1
 1 23 5 2 2 1
 1 23 5 3 2 1
 1 23 5 4 1 1
 1 23 6 1 1 1
 1 23 6 2 1 1
 1 23 6 3 2 1
 1 23 6 4 1 1
 1 23 7 1 2 1
 1 23 7 2 1 1
 1 23 7 3 2 1
 1 23 7 4 1 1
 1 23 8 1 1 1
 1 23 8 2 1 1
 1 23 8 3 1 1
 1 23 8 4 1 1
 1 23 9 1 1 1
 1 23 9 2 2 1
 1 23 9 3 1 1
 1 23 9 4 1 1
 1 23 10 1 1 1
 1 23 10 2 1 1
 1 23 10 3 1 1
 1 23 10 4 1 1
 1 23 11 1 1 1
 1 23 11 2 2 1
 1 23 11 3 1 1
 1 23 11 4 1 1
 1 23 12 1 2 1
 1 23 12 2 2 1
 1 23 12 3 1 1
 1 23 12 4 2 1
 1 23 13 1 2 1
 1 23 13 2 1 1
 1 23 13 3 1 1
 1 23 13 4 1 1
 1 23 14 1 1 1
 1 23 14 2 1 1
 1 23 14 3 1 1
 1 23 14 4 2 1
 1 23 15 1 1 1
 1 23 15 2 1 1
 1 23 15 3 1 1
 1 23 15 4 2 1
 1 23 16 1 2 1
 1 23 16 2 1 1
 1 23 16 3 1 1
 1 23 16 4 1 1
 1 23 17 1 1 1
 1 23 17 2 1 1
 1 23 17 3 1 1
 1 23 17 4 1 1
 1 23 18 1 2 1
 1 23 18 2 1 1
 1 23 18 3 2 1
 1 23 18 4 1 1
 1 23 19 1 2 1
 1 23 19 2 2 1
 1 23 19 3 1 1
 1 23 19 4 2 1
 1 23 20 1 1 1
 1 23 20 2 1 1
 1 23 20 3 1 1
 1 23 20 4 1 1
 1 23 21 1 1 1
 1 23 21 2 1 1
 1 23 21 3 2 1
 1 23 21 4 1 1
 1 23 22 1 1 1
 1 23 22 2 2 1
 1 23 22 3 1 1
 1 23 22 4 2 1
 1 23 23 1 1 1
 1 23 23 2 1 1
 1 23 23 3 1 1
 1 23 23 4 1 1
 1 23 24 1 2 1
 1 23 24 2 2 1
 1 23 24 3 2 1
 1 23 24 4 2 1
 1 23 25 1 2 1
 1 23 25 2 1 1
 1 23 25 3 2 1
 1 23 25 4 1 1
 1 23 26 1 1 1
 1 23 26 2 2 1
 1 23 26 3 1 1
 1 23 26 4 1 1
 1 23 27 1 1 1
 1 23 27 2 1 1
 1 23 27 3 1 1
 1 23 27 4 1 1
 1 23 28 1 1 1
 1 23 28 2 1 1
 1 23 28 3 1 1
 1 23 28 4 2 1
 1 23 29 1 2 1
 1 23 29 2 1 1
 1 23 29 3 1 1
 1 23 29 4 2 1
 1 23 30 1 1 1
 1 23 30 2 1 1
 1 23 30 3 1 1
 1 23 30 4 1 1
 1 23 31 1 2 1
 1 23 31 2 2 1
 1 23 31 3 1 1
 1 23 31 4 2 1
 1 23 32 1 1 1
 1 23 32 2 2 1
 1 23 32 3 1 1
 1 23 32 4 2 1
 1 24 1 1 1 1
 1 24 1 2 2 1
 1 24 1 3 1 1
 1 24 1 4 1 1
 1 24 2 1 1 1
 1 24 2 2 1 1
 1 24 2 3 2 1
 1 24 2 4 2 1
 1 24 3 1 1 1
 1 24 3 2 1 1
 1 24 3 3 2 1
 1 24 3 4 1 1
 1 24 4 1 2 1
 1 24 4 2 1 1
 1 24 4 3 2 1
 1 24 4 4 1 1
 1 24 5 1 1 1
 1 24 5 2 1 1
 1 24 5 3 1 1
 1 24 5 4 1 1
 1 24 6 1 1 1
 1 24 6 2 1 1
 1 24 6 3 1 1
 1 24 6 4 1 1
 1 24 7 1 1 1
 1 24 7 2 1 1
 1 24 7 3 1 1
 1 24 7 4 1 1
 1 24 8 1 1 1
 1 24 8 2 1 1
 1 24 8 3 1 1
 1 24 8 4 2 1
 1 24 9 1 1 1
 1 24 9 2 2 1
 1 24 9 3 2 1
 1 24 9 4 1 1
 1 24 10 1 1 1
 1 24 10 2 1 1
 1 24 10 3 2 1
 1 24 10 4 1 1
 1 24 11 1 2 1
 1 24 11 2 2 1
 1 24 11 3 1 1
 1 24 11 4 2 1
 1 24 12 1 1 1
 1 24 12 2 2 1
 1 24 12 3 2 1
 1 24 12 4 1 1
 1 24 13 1 1 1
 1 24 13 2 1 1
 1 24 13 3 2 1
 1 24 13 4 1 1
 1 24 14 1 2 1
 1 24 14 2 1 1
 1 24 14 3 1 1
 1 24 14 4 1 1
 1 24 15 1 2 1
 1 24 15 2 2 1
 1 24 15 3 2 1
 1 24 15 4 2 1
 1 24 16 1 2 1
 1 24 16 2 1 1
 1 24 16 3 1 1
 1 24 16 4 1 1
 1 24 17 1 1 1
 1 24 17 2 1 1
 1 24 17 3 1 1
 1 24 17 4 1 1
 1 24 18 1 1 1
 1 24 18 2 1 1
 1 24 18 3 1 1
 1 24 18 4 2 1
 1 24 19 1 1 1
 1 24 19 2 1 1
 1 24 19 3 1 1
 1 24 19 4 1 1
 1 24 20 1 2 1
 1 24 20 2 1 1
 1 24 20 3 1 1
 1 24 20 4 2 1
 1 24 21 1 1 1
 1 24 21 2 1 1
 1 24 21 3 2 1
 1 24 21 4 1 1
 1 24 22 1 1 1
 1 24 22 2 1 1
 1 24 22 3 2 1
 1 24 22 4 1 1
 1 24 23 1 2 1
 1 24 23 2 1 1
 1 24 23 3 2 1
 1 24 23 4 1 1
 1 24 24 1 2 1
 1 24 24 2 2 1
 1 24 24 3 1 1
 1 24 24 4 2 1
 1 24 25 1 2 1
 1 24 25 2 1 1
 1 24 25 3 1 1
 1 24 25 4 2 1
 1 24 26 1 1 1
 1 24 26 2 1 1
 1 24 26 3 1 1
 1 24 26 4 1 1
 1 24 27 1 1 1
 1 24 27 2 1 1
 1 24 27 3 2 1
 1 24 27 4 1 1
 1 24 28 1 1 1
 1 24 28 2 2 1
 1 24 28 3 2 1
 1 24 28 4 1 1
 1 24 29 1 1 1
 1 24 29 2 2 1
 1 24 29 3 1 1
 1 24 29 4 2 1
 1 24 30 1 1 1
 1 24 30 2 1 1
 1 24 30 3 1 1
 1 24 30 4 1 1
 1 24 31 1 1 1
 1 24 31 2 1 1
 1 24 31 3 1 1
 1 24 31 4 1 1
 1 24 32 1 1 1
 1 24 32 2 1 1
 1 24 32 3 2 1
 1 24 32 4 1 1
 1 25 1 1 1 1
 1 25 1 2 1 1
 1 25 1 3 2 1
 1 25 1 4 2 1
 1 25 2 1 1 1
 1 25 2 2 1 1
 1 25 2 3 1 1
 1 25 2 4 1 1
 1 25 3 1 2 1
 1 25 3 2 2 1
 1 25 3 3 2 1
 1 25 3 4 2 1
 1 25 4 1 1 1
 1 25 4 2 1 1
 1 25 4 3 2 1
 1 25 4 4 2 1
 1 25 5 1 1 1
 1 25 5 2 2 1
 1 25 5 3 2 1
 1 25 5 4 1 1
 1 25 6 1 1 1
 1 25 6 2 1 1
 1 25 6 3 1 1
 1 25 6 4 1 1
 1 25 7 1 1 1
 1 25 7 2 2 1
 1 25 7 3 1 1
 1 25 7 4 2 1
 1 25 8 1 2 1
 1 25 8 2 1 1
 1 25 8 3 1 1
 1 25 8 4 2 1
 1 25 9 1 2 1
 1 25 9 2 1 1
 1 25 9 3 2 1
 1 25 9 4 1 1
 1 25 10 1 1 1
 1 25 10 2 1 1
 1 25 10 3 1 1
 1 25 10 4 1 1
 1 25 11 1 1 1
 1 25 11 2 2 1
 1 25 11 3 1 1
 1 25 11 4 1 1
 1 25 12 1 1 1
 1 25 12 2 1 1
 1 25 12 3 1 1
 1 25 12 4 1 1
 1 25 13 1 2 1
 1 25 13 2 2 1
 1 25 13 3 1 1
 1 25 13 4 1 1
 1 25 14 1 1 1
 1 25 14 2 2 1
 1 25 14 3 2 1
 1 25 14 4 1 1
 1 25 15 1 1 1
 1 25 15 2 1 1
 1 25 15 3 1 1
 1 25 15 4 1 1
 1 25 16 1 1 1
 1 25 16 2 1 1
 1 25 16 3 1 1
 1 25 16 4 1 1
 1 25 17 1 1 1
 1 25 17 2 2 1
 1 25 17 3 1 1
 1 25 17 4 1 1
 1 25 18 1 1 1
 1 25 18 2 2 1
 1 25 18 3 1 1
 1 25 18 4 1 1
 1 25 19 1 1 1
 1 25 19 2 1 1
 1 25 19 3 2 1
 1 25 19 4 1 1
 1 25 20 1 2 1
 1 25 20 2 2 1
 1 25 20 3 1 1
 1 25 20 4 1 1
 1 25 21 1 2 1
 1 25 21 2 2 1
 1 25 21 3 2 1
 1 25 21 4 1 1
 1 25 22 1 2 1
 1 25 22 2 1 1
 1 25 22 3 2 1
 1 25 22 4 1 1
 1 25 23 1 1 1
 1 25 23 2 1 1
 1 25 23 3 1 1
 1 25 23 4 2 1
 1 25 24 1 2 1
 1 25 24 2 1 1
 1 25 24 3 1 1
 1 25 24 4 1 1
 1 25 25 1 2 1
 1 25 25 2 1 1
 1 25 25 3 1 1
 1 25 25 4 1 1
 1 25 26 1 1 1
 1 25 26 2 2 1
 1 25 26 3 1 1
 1 25 26 4 1 1
 1 25 27 1 1 1
 1 25 27 2 2 1
 1 25 27 3 2 1
 1 25 27 4 2 1
 1 25 28 1 2 1
 1 25 28 2 1 1
 1 25 28 3 2 1
 1 25 28 4 1 1
 1 25 29 1 2 1
 1 25 29 2 1 1
 1 25 29 3 1 1
 1 25 29 4 1 1
 1 25 30 1 1 1
 1 25 30 2 2 1
 1 25 30 3 2 1
 1 25 30 4 2 1
 1 25 31 1 2 1
 1 25 31 2 1 1
 1 25 31 3 1 1
 1 25 31 4 2 1
 1 25 32 1 2 1
 1 25 32 2 1 1
 1 25 32 3 1 1
 1 25 32 4 1 1
 1 26 1 1 1 1
 1 26 1 2 1 1
 1 26 1 3 1 1
 1 26 1 4 2 1
 1 26 2 1 2 1
 1 26 2 2 1 1
 1 26 2 3 2 1
 1 26 2 4 1 1
 1 26 3 1 1 1
 1 26 3 2 1 1
 1 26 3 3 1 1
 1 26 3 4 2 1
 1 26 4 1 1 1
 1 26 4 2 2 1
 1 26 4 3 2 1
 1 26 4 4 1 1
 1 26 5 1 1 1
 1 26 5 2 1 1
 1 26 5 3 1 1
 1 26 5 4 1 1
 1 26 6 1 1 1
 1 26 6 2 2 1
 1 26 6 3 1 1
 1 26 6 4 2 1
 1 26 7 1 1 1
 1 26 7 2 1 1
 1 26 7 3 1 1
 1 26 7 4 1 1
 1 26 8 1 1 1
 1 26 8 2 1 1
 1 26 8 3 1 1
 1 26 8 4 1 1
 1 26 9 1 1 1
 1 26 9 2 2 1
 1 26 9 3 2 1
 1 26 9 4 1 1
 1 26 10 1 1 1
 1 26 10 2 1 1
 1 26 10 3 1 1
 1 26 10 4 2 1
 1 26 11 1 2 1
 1 26 11 2 1 1
 1 26 11 3 2 1
 1 26 11 4 1 1
 1 26 12 1 1 1
 1 26 12 2 1 1
 1 26 12 3 1 1
 1 26 12 4 1 1
 1 26 13 1 1 1
 1 26 13 2 2 1
 1 26 13 3 2 1
 1 26 13 4 1 1
 1 26 14 1 1 1
 1 26 14 2 2 1
 1 26 14 3 1 1
 1 26 14 4 2 1
 1 26 15 1 1 1
 1 26 15 2 1 1
 1 26 15 3 2 1
 1 26 15 4 1 1
 1 26 16 1 1 1
 1 26 16 2 1 1
 1 26 16 3 1 1
 1 26 16 4 1 1
 1 26 17 1 2 1
 1 26 17 2 1 1
 1 26 17 3 1 1
 1 26 17 4 1 1
 1 26 18 1 1 1
 1 26 18 2 2 1
 1 26 18 3 1 1
 1 26 18 4 1 1
 1 26 19 1 2 1
 1 26 19 2 1 1
 1 26 19 3 2 1
 1 26 19 4 2 1
 1 26 20 1 1 1
 1 26 20 2 1 1
 1 26 20 3 1 1
 1 26 20 4 2 1
 1 26 21 1 2 1
 1 26 21 2 2 1
 1 26 21 3 1 1
 1 26 21 4 2 1
 1 26 22 1 1 1
 1 26 22 2 1 1
 1 26 22 3 1 1
 1 26 22 4 1 1
 1 26 23 1 2 1
 1 26 23 2 1 1
 1 26 23 3 1 1
 1 26 23 4 2 1
 1 26 24 1 1 1
 1 26 24 2 1 1
 1 26 24 3 1 1
 1 26 24 4 1 1
 1 26 25 1 1 1
 1 26 25 2 1 1
 1 26 25 3 2 1
 1 26 25 4 1 1
 1 26 26 1 2 1
 1 26 26 2 2 1
 1 26 26 3 1 1
 1 26 26 4 1 1
 1 26 27 1 1 1
 1 26 27 2 1 1
 1 26 27 3 1 1
 1 26 27 4 1 1
 1 26 28 1 2 1
 1 26 28 2 2 1
 1 26 28 3 1 1
 1 26 28 4 2 1
 1 26 29 1 1 1
 1 26 29 2 1 1
 1 26 29 3 1 1
 1 26 29 4 2 1
 1 26 30 1 2 1
 1 26 30 2 1 1
 1 26 30 3 2 1
 1 26 30 4 2 1
 1 26 31 1 2 1
 1 26 31 2 1 1
 1 26 31 3 1 1
 1 26 31 4 1 1
 1 26 32 1 1 1
 1 26 32 2 1 1
 1 26 32 3 2 1
 1 26 32 4 2 1
 1 27 1 1 1 1
 1 27 1 2 2 1
 1 27 1 3 1 1
 1 27 1 4 1 1
 1 27 2 1 2 1
 1 27 2 2 1 1
 1 27 2 3 1 1
 1 27 2 4 2 1
 1 27 3 1 1 1
 1 27 3 2 1 1
 1 27 3 3 1 1
 1 27 3 4 1 1
 1 27 4 1 2 1
 1 27 4 2 1 1
 1 27 4 3 1 1
 1 27 4 4 1 1
 1 27 5 1 1 1
 1 27 5 2 1 1
 1 27 5 3 1 1
 1 27 5 4 1 1
 1 27 6 1 1 1
 1 27 6 2 2 1
 1 27 6 3 1 1
 1 27 6 4 1 1
 1 27 7 1 2 1
 1 27 7 2 1 1
 1 27 7 3 1 1
 1 27 7 4 2 1
 1 27 8 1 1 1
 1 27 8 2 1 1
 1 27 8 3 1 1
 1 27 8 4 1 1
 1 27 9 1 1 1
 1 27 9 2 1 1
 1 27 9 3 1 1
 1 27 9 4 1 1
 1 27 10 1 1 1
 1 27 10 2 1 1
 1 27 10 3 1 1
 1 27 10 4 2 1
 1 27 11 1 2 1
 1 27 11 2 1 1
 1 27 11 3 1 1
 1 27 11 4 1 1
 1 27 12 1 1 1
 1 27 12 2 1 1
 1 27 12 3 1 1
 1 27 12 4 1 1
 1 27 13 1 1 1
 1 27 13 2 2 1
 1 27 13 3 1 1
 1 27 13 4 1 1
 1 27 14 1 1 1
 1 27 14 2 1 1
 1 27 14 3 1 1
 1 27 14 4 1 1
 1 27 15 1 2 1
 1 27 15 2 2 1
 1 27 15 3 2 1
 1 27 15 4 1 1
 1 27 16 1 1 1
 1 27 16 2 1 1
 1 27 16 3 1 1
 1 27 16 4 1 1
 1 27 17 1 2 1
 1 27 17 2 1 1
 1 27 17 3 2 1
 1 27 17 4 1 1
 1 27 18 1 1 1
 1 27 18 2 1 1
 1 27 18 3 1 1
 1 27 18 4 2 1
 1 27 19 1 1 1
 1 27 19 2 1 1
 1 27 19 3 1 1
 1 27 19 4 2 1
 1 27 20 1 2 1
 1 27 20 2 2 1
 1 27 20 3 2 1
 1 27 20 4 2 1
 1 27 21 1 1 1
 1 27 21 2 1 1
 1 27 21 3 2 1
 1 27 21 4 1 1
 1 27 22 1 1 1
 1 27 22 2 1 1
 1 27 22 3 2 1
 1 27 22 4 1 1
 1 27 23 1 2 1
 1 27 23 2 1 1
 1 27 23 3 1 1
 1 27 23 4 1 1
 1 27 24 1 1 1
 1 27 24 2 1 1
 1 27 24 3 2 1
 1 27 24 4 2 1
 1 27 25 1 1 1
 1 27 25 2 2 1
 1 27 25 3 1 1
 1 27 25 4 1 1
 1 27 26 1 2 1
 1 27 26 2 1 1
 1 27 26 3 1 1
 1 27 26 4 1 1
 1 27 27 1 1 1
 1 27 27 2 1 1
 1 27 27 3 1 1
 1 27 27 4 2 1
 1 27 28 1 2 1
 1 27 28 2 1 1
 1 27 28 3 1 1
 1 27 28 4 2 1
 1 27 29 1 1 1
 1 27 29 2 1 1
 1 27 29 3 1 1
 1 27 29 4 1 1
 1 27 30 1 1 1
 1 27 30 2 1 1
 1 27 30 3 2 1
 1 27 30 4 2 1
 1 27 31 1 1 1
 1 27 31 2 1 1
 1 27 31 3 1 1
 1 27 31 4 1 1
 1 27 32 1 1 1
 1 27 32 2 1 1
 1 27 32 3 2 1
 1 27 32 4 1 1
 1 28 1 1 1 1
 1 28 1 2 2 1
 1 28 1 3 1 1
 1 28 1 4 1 1
 1 28 2 1 1 1
 1 28 2 2 2 1
 1 28 2 3 1 1
 1 28 2 4 1 1
 1 28 3 1 2 1
 1 28 3 2 2 1
 1 28 3 3 2 1
 1 28 3 4 1 1
 1 28 4 1 1 1
 1 28 4 2 2 1
 1 28 4 3 2 1
 1 28 4 4 1 1
 1 28 5 1 1 1
 1 28 5 2 1 1
 1 28 5 3 1 1
 1 28 5 4 2 1
 1 28 6 1 1 1
 1 28 6 2 1 1
 1 28 6 3 1 1
 1 28 6 4 1 1
 1 28 7 1 1 1
 1 28 7 2 1 1
 1 28 7 3 2 1
 1 28 7 4 1 1
 1 28 8 1 1 1
 1 28 8 2 1 1
 1 28 8 3 1 1
 1 28 8 4 1 1
 1 28 9 1 2 1
 1 28 9 2 1 1
 1 28 9 3 1 1
 1 28 9 4 1 1
 1 28 10 1 1 1
 1 28 10 2 1 1
 1 28 10 3 2 1
 1 28 10 4 1 1
 1 28 11 1 1 1
 1 28 11 2 1 1
 1 28 11 3 2 1
 1 28 11 4 1 1
 1 28 12 1 1 1
 1 28 12 2 1 1
 1 28 12 3 1 1
 1 28 12 4 2 1
 1 28 13 1 1 1
 1 28 13 2 1 1
 1 28 13 3 1 1
 1 28 13 4 1 1
 1 28 14 1 1 1
 1 28 14 2 1 1
 1 28 14 3 1 1
 1 28 14 4 1 1
 1 28 15 1 1 1
 1 28 15 2 2 1
 1 28 15 3 1 1
 1 28 15 4 1 1
 1 28 16 1 1 1
 1 28 16 2 1 1
 1 28 16 3 1 1
 1 28 16 4 1 1
 1 28 17 1 1 1
 1 28 17 2 1 1
 1 28 17 3 1 1
 1 28 17 4 1 1
 1 28 18 1 2 1
 1 28 18 2 1 1
 1 28 18 3 1 1
 1 28 18 4 1 1
 1 28 19 1 1 1
 1 28 19 2 2 1
 1 28 19 3 2 1
 1 28 19 4 1 1
 1 28 20 1 1 1
 1 28 20 2 1 1
 1 28 20 3 1 1
 1 28 20 4 1 1
 1 28 21 1 1 1
 1 28 21 2 1 1
 1 28 21 3 2 1
 1 28 21 4 1 1
 1 28 22 1 2 1
 1 28 22 2 2 1
 1 28 22 3 1 1
 1 28 22 4 2 1
 1 28 23 1 1 1
 1 28 23 2 1 1
 1 28 23 3 2 1
 1 28 23 4 1 1
 1 28 24 1 2 1
 1 28 24 2 1 1
 1 28 24 3 1 1
 1 28 24 4 2 1
 1 28 25 1 1 1
 1 28 25 2 1 1
 1 28 25 3 1 1
 1 28 25 4 1 1
 1 28 26 1 2 1
 1 28 26 2 2 1
 1 28 26 3 1 1
 1 28 26 4 1 1
 1 28 27 1 1 1
 1 28 27 2 2 1
 1 28 27 3 1 1
 1 28 27 4 1 1
 1 28 28 1 1 1
 1 28 28 2 1 1
 1 28 28 3 1 1
 1 28 28 4 1 1
 1 28 29 1 2 1
 1 28 29 2 1 1
 1 28 29 3 1 1
 1 28 29 4 1 1
 1 28 30 1 1 1
 1 28 30 2 1 1
 1 28 30 3 2 1
 1 28 30 4 1 1
 1 28 31 1 1 1
 1 28 31 2 2 1
 1 28 31 3 2 1
 1 28 31 4 2 1
 1 28 32 1 1 1
 1 28 32 2 1 1
 1 28 32 3 1 1
 1 28 32 4 1 1
 1 29 1 1 2 1
 1 29 1 2 1 1
 1 29 1 3 1 1
 1 29 1 4 1 1
 1 29 2 1 1 1
 1 29 2 2 1 1
 1 29 2 3 1 1
 1 29 2 4 1 1
 1 29 3 1 1 1
 1 29 3 2 2 1
 1 29 3 3 2 1
 1 29 3 4 1 1
 1 29 4 1 1 1
 1 29 4 2 1 1
 1 29 4 3 1 1
 1 29 4 4 2 1
 1 29 5 1 1 1
 1 29 5 2 2 1
 1 29 5 3 2 1
 1 29 5 4 2 1
 1 29 6 1 1 1
 1 29 6 2 2 1
 1 29 6 3 1 1
 1 29 6 4 1 1
 1 29 7 1 2 1
 1 29 7 2 1 1
 1 29 7 3 1 1
 1 29 7 4 1 1
 1 29 8 1 1 1
 1 29 8 2 1 1
 1 29 8 3 1 1
 1 29 8 4 2 1
 1 29 9 1 1 1
 1 29 9 2 1 1
 1 29 9 3 2 1
 1 29 9 4 1 1
 1 29 10 1 1 1
 1 29 10 2 1 1
 1 29 10 3 2 1
 1 29 10 4 2 1
 1 29 11 1 1 1
 1 29 11 2 1 1
 1 29 11 3 2 1
 1 29 11 4 1 1
 1 29 12 1 2 1
 1 29 12 2 1 1
 1 29 12 3 2 1
 1 29 12 4 2 1
 1 29 13 1 1 1
 1 29 13 2 2 1
 1 29 13 3 1 1
 1 29 13 4 1 1
 1 29 14 1 1 1
 1 29 14 2 1 1
 1 29 14 3 1 1
 1 29 14 4 1 1
 1 29 15 1 1 1
 1 29 15 2 2 1
 1 29 15 3 1 1
 1 29 15 4 2 1
 1 29 16 1 2 1
 1 29 16 2 2 1
 1 29 16 3 1 1
 1 29 16 4 1 1
 1 29 17 1 2 1
 1 29 17 2 2 1
 1 29 17 3 2 1
 1 29 17 4 1 1
 1 29 18 1 1 1
 1 29 18 2 2 1
 1 29 18 3 1 1
 1 29 18 4 2 1
 1 29 19 1 1 1
 1 29 19 2 1 1
 1 29 19 3 2 1
 1 29 19 4 1 1
 1 29 20 1 1 1
 1 29 20 2 1 1
 1 29 20 3 1 1
 1 29 20 4 1 1
 1 29 21 1 1 1
 1 29 21 2 1 1
 1 29 21 3 1 1
 1 29 21 4 1 1
 1 29 22 1 1 1
 1 29 22 2 2 1
 1 29 22 3 1 1
 1 29 22 4 1 1
 1 29 23 1 2 1
 1 29 23 2 1 1
 1 29 23 3 2 1
 1 29 23 4 2 1
 1 29 24 1 1 1
 1 29 24 2 1 1
 1 29 24 3 2 1
 1 29 24 4 2 1
 1 29 25 1 1 1
 1 29 25 2 2 1
 1 29 25 3 1 1
 1 29 25 4 2 1
 1 29 26 1 1 1
 1 29 26 2 1 1
 1 29 26 3 2 1
 1 29 26 4 1 1
 1 29 27 1 2 1
 1 29 27 2 2 1
 1 29 27 3 2 1
 1 29 27 4 1 1
 1 29 28 1 1 1
 1 29 28 2 1 1
 1 29 28 3 1 1
 1 29 28 4 2 1
 1 29 29 1 1 1
 1 29 29 2 1 1
 1 29 29 3 1 1
 1 29 29 4 1 1
 1 29 30 1 1 1
 1 29 30 2 1 1
 1 29 30 3 1 1
 1 29 30 4 1 1
 1 29 31 1 2 1
 1 29 31 2 2 1
 1 29 31 3 1 1
 1 29 31 4 1 1
 1 29 32 1 2 1
 1 29 32 2 1 1
 1 29 32 3 1 1
 1 29 32 4 1 1
 1 30 1 1 1 1
 1 30 1 2 2 1
 1 30 1 3 1 1
 1 30 1 4 2 1
 1 30 2 1 1 1
 1 30 2 2 1 1
 1 30 2 3 1 1
 1 30 2 4 1 1
 1 30 3 1 1 1
 1 30 3 2 2 1
 1 30 3 3 1 1
 1 30 3 4 1 1
 1 30 4 1 1 1
 1 30 4 2 1 1
 1 30 4 3 1 1
 1 30 4 4 1 1
 1 30 5 1 1 1
 1 30 5 2 1 1
 1 30 5 3 2 1
 1 30 5 4 2 1
 1 30 6 1 2 1
 1 30 6 2 1 1
 1 30 6 3 1 1
 1 30 6 4 1 1
 1 30 7 1 1 1
 1 30 7 2 1 1
 1 30 7 3 1 1
 1 30 7 4 1 1
 1 30 8 1 1 1
 1 30 8 2 1 1
 1 30 8 3 1 1
 1 30 8 4 2 1
 1 30 9 1 2 1
 1 30 9 2 2 1
 1 30 9 3 2 1
 1 30 9 4 1 1
 1 30 10 1 1 1
 1 30 10 2 2 1
 1 30 10 3 2 1
 1 30 10 4 1 1
 1 30 11 1 1 1
 1 30 11 2 1 1
 1 30 11 3 1 1
 1 30 11 4 1 1
 1 30 12 1 2 1
 1 30 12 2 1 1
 1 30 12 3 1 1
 1 30 12 4 1 1
 1 30 13 1 1 1
 1 30 13 2 1 1
 1 30 13 3 2 1
 1 30 13 4 1 1
 1 30 14 1 1 1
 1 30 14 2 2 1
 1 30 14 3 1 1
 1 30 14 4 1 1
 1 30 15 1 1 1
 1 30 15 2 1 1
 1 30 15 3 2 1
 1 30 15 4 2 1
 1 30 16 1 2 1
 1 30 16 2 1 1
 1 30 16 3 1 1
 1 30 16 4 2 1
 1 30 17 1 1 1
 1 30 17 2 1 1
 1 30 17 3 1 1
 1 30 17 4 1 1
 1 30 18 1 1 1
 1 30 18 2 1 1
 1 30 18 3 1 1
 1 30 18 4 1 1
 1 30 19 1 1 1
 1 30 19 2 1 1
 1 30 19 3 1 1
 1 30 19 4 2 1
 1 30 20 1 2 1
 1 30 20 2 2 1
 1 30 20 3 2 1
 1 30 20 4 1 1
 1 30 21 1 1 1
 1 30 21 2 1 1
 1 30 21 3 2 1
 1 30 21 4 1 1
 1 30 22 1 2 1
 1 30 22 2 1 1
 1 30 22 3 1 1
 1 30 22 4 1 1
 1 30 23 1 2 1
 1 30 23 2 1 1
 1 30 23 3 1 1
 1 30 23 4 1 1
 1 30 24 1 2 1
 1 30 24 2 1 1
 1 30 24 3 1 1
 1 30 24 4 1 1
 1 30 25 1 1 1
 1 30 25 2 1 1
 1 30 25 3 1 1
 1 30 25 4 1 1
 1 30 26 1 1 1
 1 30 26 2 1 1
 1 30 26 3 1 1
 1 30 26 4 2 1
 1 30 27 1 1 1
 1 30 27 2 1 1
 1 30 27 3 2 1
 1 30 27 4 1 1
 1 30 28 1 2 1
 1 30 28 2 1 1
 1 30 28 3 1 1
 1 30 28 4 1 1
 1 30 29 1 2 1
 1 30 29 2 1 1
 1 30 29 3 2 1
 1 30 29 4 2 1
 1 30 30 1 1 1
 1 30 30 2 1 1
 1 30 30 3 1 1
 1 30 30 4 1 1
 1 30 31 1 2 1
 1 30 31 2 1 1
 1 30 31 3 2 1
 1 30 31 4 1 1
 1 30 32 1 1 1
 1 30 32 2 1 1
 1 30 32 3 1 1
 1 30 32 4 2 1
 1 31 1 1 2 1
 1 31 1 2 1 1
 1 31 1 3 2 1
 1 31 1 4 1 1
 1 31 2 1 1 1
 1 31 2 2 2 1
 1 31 2 3 2 1
 1 31 2 4 1 1
 1 31 3 1 1 1
 1 31 3 2 2 1
 1 31 3 3 2 1
 1 31 3 4 1 1
 1 31 4 1 1 1
 1 31 4 2 1 1
 1 31 4 3 1 1
 1 31 4 4 1 1
 1 31 5 1 1 1
 1 31 5 2 1 1
 1 31 5 3 2 1
 1 31 5 4 1 1
 1 31 6 1 1 1
 1 31 6 2 2 1
 1 31 6 3 1 1
 1 31 6 4 1 1
 1 31 7 1 2 1
 1 31 7 2 1 1
 1 31 7 3 2 1
 1 31 7 4 2 1
 1 31 8 1 1 1
 1 31 8 2 1 1
 1 31 8 3 1 1
 1 31 8 4 2 1
 1 31 9 1 2 1
 1 31 9 2 1 1
 1 31 9 3 2 1
 1 31 9 4 1 1
 1 31 10 1 1 1
 1 31 10 2 1 1
 1 31 10 3 1 1
 1 31 10 4 2 1
 1 31 11 1 1 1
 1 31 11 2 2 1
 1 31 11 3 1 1
 1 31 11 4 1 1
 1 31 12 1 1 1
 1 31 12 2 1 1
 1 31 12 3 2 1
 1 31 12 4 2 1
 1 31 13 1 1 1
 1 31 13 2 2 1
 1 31 13 3 1 1
 1 31 13 4 2 1
 1 31 14 1 1 1
 1 31 14 2 1 1
 1 31 14 3 1 1
 1 31 14 4 1 1
 1 31 15 1 2 1
 1 31 15 2 1 1
 1 31 15 3 1 1
 1 31 15 4 2 1
 1 31 16 1 1 1
 1 31 16 2 1 1
 1 31 16 3 1 1
 1 31 16 4 1 1
 1 31 17 1 1 1
 1 31 17 2 2 1
 1 31 17 3 1 1
 1 31 17 4 1 1
 1 31 18 1 2 1
 1 31 18 2 1 1
 1 31 18 3 1 1
 1 31 18 4 1 1
 1 31 19 1 1 1
 1 31 19 2 1 1
 1 31 19 3 1 1
 1 31 19 4 2 1
 1 31 20 1 1 1
 1 31 20 2 1 1
 1 31 20 3 1 1
 1 31 20 4 1 1
 1 31 21 1 1 1
 1 31 21 2 2 1
 1 31 21 3 1 1
 1 31 21 4 1 1
 1 31 22 1 2 1
 1 31 22 2 1 1
 1 31 22 3 2 1
 1 31 22 4 1 1
 1 31 23 1 1 1
 1 31 23 2 1 1
 1 31 23 3 1 1
 1 31 23 4 1 1
 1 31 24 1 2 1
 1 31 24 2 2 1
 1 31 24 3 2 1
 1 31 24 4 1 1
 1 31 25 1 2 1
 1 31 25 2 1 1
 1 31 25 3 2 1
 1 31 25 4 1 1
 1 31 26 1 2 1
 1 31 26 2 1 1
 1 31 26 3 2 1
 1 31 26 4 2 1
 1 31 27 1 2 1
 1 31 27 2 1 1
 1 31 27 3 1 1
 1 31 27 4 1 1
 1 31 28 1 1 1
 1 31 28 2 1 1
 1 31 28 3 2 1
 1 31 28 4 1 1
 1 31 29 1 1 1
 1 31 29 2 2 1
 1 31 29 3 1 1
 1 31 29 4 1 1
 1 31 30 1 1 1
 1 31 30 2 1 1
 1 31 30 3 1 1
 1 31 30 4 1 1
 1 31 31 1 1 1
 1 31 31 2 1 1
 1 31 31 3 2 1
 1 31 31 4 1 1
 1 31 32 1 2 1
 1 31 32 2 2 1
 1 31 32 3 1 1
 1 31 32 4 2 1
 1 32 1 1 1 1
 1 32 1 2 1 1
 1 32 1 3 2 1
 1 32 1 4 1 1
 1 32 2 1 1 1
 1 32 2 2 1 1
 1 32 2 3 1 1
 1 32 2 4 2 1
 1 32 3 1 1 1
 1 32 3 2 1 1
 1 32 3 3 2 1
 1 32 3 4 1 1
 1 32 4 1 1 1
 1 32 4 2 1 1
 1 32 4 3 1 1
 1 32 4 4 2 1
 1 32 5 1 2 1
 1 32 5 2 2 1
 1 32 5 3 1 1
 1 32 5 4 1 1
 1 32 6 1 1 1
 1 32 6 2 1 1
 1 32 6 3 1 1
 1 32 6 4 2 1
 1 32 7 1 2 1
 1 32 7 2 1 1
 1 32 7 3 1 1
 1 32 7 4 1 1
 1 32 8 1 1 1
 1 32 8 2 1 1
 1 32 8 3 1 1
 1 32 8 4 1 1
 1 32 9 1 1 1
 1 32 9 2 1 1
 1 32 9 3 2 1
 1 32 9 4 1 1
 1 32 10 1 1 1
 1 32 10 2 1 1
 1 32 10 3 1 1
 1 32 10 4 2 1
 1 32 11 1 1 1
 1 32 11 2 1 1
 1 32 11 3 2 1
 1 32 11 4 1 1
 1 32 12 1 2 1
 1 32 12 2 1 1
 1 32 12 3 2 1
 1 32 12 4 2 1
 1 32 13 1 2 1
 1 32 13 2 2 1
 1 32 13 3 2 1
 1 32 13 4 1 1
 1 32 14 1 1 1
 1 32 14 2 2 1
 1 32 14 3 1 1
 1 32 14 4 1 1
 1 32 15 1 1 1
 1 32 15 2 1 1
 1 32 15 3 2 1
 1 32 15 4 1 1
 1 32 16 1 1 1
 1 32 16 2 1 1
 1 32 16 3 1 1
 1 32 16 4 1 1
 1 32 17 1 2 1
 1 32 17 2 1 1
 1 32 17 3 1 1
 1 32 17 4 1 1
 1 32 18 1 1 1
 1 32 18 2 1 1
 1 32 18 3 1 1
 1 32 18 4 2 1
 1 32 19 1 2 1
 1 32 19 2 2 1
 1 32 19 3 2 1
 1 32 19 4 2 1
 1 32 20 1 2 1
 1 32 20 2 1 1
 1 32 20 3 1 1
 1 32 20 4 1 1
 1 32 21 1 1 1
 1 32 21 2 2 1
 1 32 21 3 1 1
 1 32 21 4 1 1
 1 32 22 1 1 1
 1 32 22 2 1 1
 1 32 22 3 1 1
 1 32 22 4 1 1
 1 32 23 1 2 1
 1 32 23 2 1 1
 1 32 23 3 2 1
 1 32 23 4 1 1
 1 32 24 1 2 1
 1 32 24 2 2 1
 1 32 24 3 1 1
 1 32 24 4 1 1
 1 32 25 1 1 1
 1 32 25 2 2 1
 1 32 25 3 1 1
 1 32 25 4 2 1
 1 32 26 1 1 1
 1 32 26 2 1 1
 1 32 26 3 2 1
 1 32 26 4 1 1
 1 32 27 1 1 1
 1 32 27 2 2 1
 1 32 27 3 2 1
 1 32 27 4 2 1
 1 32 28 1 1 1
 1 32 28 2 1 1
 1 32 28 3 1 1
 1 32 28 4 1 1
 1 32 29 1 2 1
 1 32 29 2 2 1
 1 32 29 3 2 1
 1 32 29 4 1 1
 1 32 30 1 1 1
 1 32 30 2 1 1
 1 32 30 3 2 1
 1 32 30 4 1 1
 1 32 31 1 2 1
 1 32 31 2 1 1
 1 32 31 3 1 1
 1 32 31 4 1 1
 1 32 32 1 1 1
 1 32 32 2 1 1
 1 32 32 3 1 1
 1 32 32 4 2 1
 2 1 1 1 1 1
 2 1 1 2 1 1
 2 1 1 3 1 1
 2 1 1 4 1 1
 2 1 2 1 1 1
 2 1 2 2 1 1
 2 1 2 3 2 1
 2 1 2 4 1 1
 2 1 3 1 1 1
 2 1 3 2 1 1
 2 1 3 3 1 1
 2 1 3 4 1 1
 2 1 4 1 1 1
 2 1 4 2 1 1
 2 1 4 3 1 1
 2 1 4 4 2 1
 2 1 5 1 1 1
 2 1 5 2 1 1
 2 1 5 3 1 1
 2 1 5 4 1 1
 2 1 6 1 1 1
 2 1 6 2 1 1
 2 1 6 3 1 1
 2 1 6 4 1 1
 2 1 7 1 1 1
 2 1 7 2 2 1
 2 1 7 3 1 1
 2 1 7 4 1 1
 2 1 8 1 2 1
 2 1 8 2 1 1
 2 1 8 3 1 1
 2 1 8 4 2 1
 2 1 9 1 1 1
 2 1 9 2 2 1
 2 1 9 3 2 1
 2 1 9 4 2 1
 2 1 10 1 2 1
 2 1 10 2 2 1
 2 1 10 3 1 1
 2 1 10 4 1 1
 2 1 11 1 1 1
 2 1 11 2 1 1
 2 1 11 3 1 1
 2 1 11 4 1 1
 2 1 12 1 2 1
 2 1 12 2 1 1
 2 1 12 3 1 1
 2 1 12 4 2 1
 2 1 13 1 2 1
 2 1 13 2 2 1
 2 1 13 3 2 1
 2 1 13 4 1 1
 2 1 14 1 1 1
 2 1 14 2 1 1
 2 1 14 3 1 1
 2 1 14 4 2 1
 2 1 15 1 1 1
 2 1 15 2 1 1
 2 1 15 3 1 1
 2 1 15 4 1 1
 2 1 16 1 1 1
 2 1 16 2 1 1
 2 1 16 3 2 1
 2 1 16 4 1 1
 2 1 17 1 1 1
 2 1 17 2 1 1
 2 1 17 3 1 1
 2 1 17 4 1 1
 2 1 18 1 1 1
 2 1 18 2 1 1
 2 1 18 3 1 1
 2 1 18 4 1 1
 2 1 19 1 2 1
 2 1 19 2 2 1
 2 1 19 3 1 1
 2 1 19 4 1 1
 2 1 20 1 1 1
 2 1 20 2 1 1
 2 1 20 3 2 1
 2 1 20 4 1 1
 2 1 21 1 1 1
 2 1 21 2 1 1
 2 1 21 3 2 1
 2 1 21 4 1 1
 2 1 22 1 1 1
 2 1 22 2 2 1
 2 1 22 3 1 1
 2 1 22 4 2 1
 2 1 23 1 2 1
 2 1 23 2 1 1
 2 1 23 3 2 1
 2 1 23 4 2 1
 2 1 24 1 1 1
 2 1 24 2 2 1
 2 1 24 3 1 1
 2 1 24 4 1 1
 2 1 25 1 2 1
 2 1 25 2 1 1
 2 1 25 3 2 1
 2 1 25 4 1 1
 2 1 26 1 1 1
 2 1 26 2 2 1
 2 1 26 3 2 1
 2 1 26 4 2 1
 2 1 27 1 2 1
 2 1 27 2 1 1
 2 1 27 3 1 1
 2 1 27 4 1 1
 2 1 28 1 1 1
 2 1 28 2 2 1
 2 1 28 3 2 1
 2 1 28 4 1 1
 2 1 29 1 1 1
 2 1 29 2 1 1
 2 1 29 3 1 1
 2 1 29 4 1 1
 2 1 30 1 1 1
 2 1 30 2 2 1
 2 1 30 3 2 1
 2 1 30 4 1 1
 2 1 31 1 1 1
 2 1 31 2 1 1
 2 1 31 3 1 1
 2 1 31 4 2 1
 2 1 32 1 1 1
 2 1 32 2 1 1
 2 1 32 3 1 1
 2 1 32 4 2 1
 2 2 1 1 1 1
 2 2 1 2 2 1
 2 2 1 3 2 1
 2 2 1 4 1 1
 2 2 2 1 1 1
 2 2 2 2 2 1
 2 2 2 3 1 1
 2 2 2 4 1 1
 2 2 3 1 1 1
 2 2 3 2 1 1
 2 2 3 3 1 1
 2 2 3 4 2 1
 2 2 4 1 1 1
 2 2 4 2 1 1
 2 2 4 3 1 1
 2 2 4 4 1 1
 2 2 5 1 1 1
 2 2 5 2 1 1
 2 2 5 3 1 1
 2 2 5 4 1 1
 2 2 6 1 2 1
 2 2 6 2 1 1
 2 2 6 3 1 1
 2 2 6 4 1 1
 2 2 7 1 2 1
 2 2 7 2 2 1
 2 2 7 3 2 1
 2 2 7 4 2 1
 2 2 8 1 1 1
 2 2 8 2 2 1
 2 2 8 3 1 1
 2 2 8 4 1 1
 2 2 9 1 1 1
 2 2 9 2 2 1
 2 2 9 3 2 1
 2 2 9 4 1 1
 2 2 10 1 2 1
 2 2 10 2 2 1
 2 2 10 3 2 1
 2 2 10 4 1 1
 2 2 11 1 1 1
 2 2 11 2 1 1
 2 2 11 3 1 1
 2 2 11 4 1 1
 2 2 12 1 1 1
 2 2 12 2 2 1
 2 2 12 3 2 1
 2 2 12 4 2 1
 2 2 13 1 1 1
 2 2 13 2 1 1
 2 2 13 3 2 1
 2 2 13 4 1 1
 2 2 14 1 1 1
 2 2 14 2 1 1
 2 2 14 3 2 1
 2 2 14 4 2 1
 2 2 15 1 1 1
 2 2 15 2 1 1
 2 2 15 3 2 1
 2 2 15 4 2 1
 2 2 16 1 1 1
 2 2 16 2 1 1
 2 2 16 3 1 1
 2 2 16 4 1 1
 2 2 17 1 2 1
 2 2 17 2 1 1
 2 2 17 3 2 1
 2 2 17 4 1 1
 2 2 18 1 1 1
 2 2 18 2 2 1
 2 2 18 3 1 1
 2 2 18 4 2 1
 2 2 19 1 1 1
 2 2 19 2 1 1
 2 2 19 3 1 1
 2 2 19 4 1 1
 2 2 20 1 1 1
 2 2 20 2 1 1
 2 2 20 3 1 1
 2 2 20 4 2 1
 2 2 21 1 2 1
 2 2 21 2 1 1
 2 2 21 3 2 1
 2 2 21 4 2 1
 2 2 22 1 2 1
 2 2 22 2 2 1
 2 2 22 3 1 1
 2 2 22 4 1 1
 2 2 23 1 2 1
 2 2 23 2 1 1
 2 2 23 3 2 1
 2 2 23 4 2 1
 2 2 24 1 2 1
 2 2 24 2 1 1
 2 2 24 3 1 1
 2 2 24 4 1 1
 2 2 25 1 2 1
 2 2 25 2 1 1
 2 2 25 3 2 1
 2 2 25 4 1 1
 2 2 26 1 1 1
 2 2 26 2 2 1
 2 2 26 3 1 1
 2 2 26 4 1 1
 2 2 27 1 2 1
 2 2 27 2 1 1
 2 2 27 3 1 1
 2 2 27 4 1 1
 2 2 28 1 1 1
 2 2 28 2 1 1
 2 2 28 3 2 1
 2 2 28 4 1 1
 2 2 29 1 1 1
 2 2 29 2 1 1
 2 2 29 3 1 1
 2 2 29 4 1 1
 2 2 30 1 2 1
 2 2 30 2 1 1
 2 2 30 3 1 1
 2 2 30 4 1 1
 2 2 31 1 2 1
 2 2 31 2 1 1
 2 2 31 3 2 1
 2 2 31 4 1 1
 2 2 32 1 1 1
 2 2 32 2 1 1
 2 2 32 3 1 1
 2 2 32 4 2 1
 2 3 1 1 2 1
 2 3 1 2 1 1
 2 3 1 3 1 1
 2 3 1 4 1 1
 2 3 2 1 1 1
 2 3 2 2 2 1
 2 3 2 3 1 1
 2 3 2 4 1 1
 2 3 3 1 1 1
 2 3 3 2 1 1
 2 3 3 3 1 1
 2 3 3 4 1 1
 2 3 4 1 2 1
 2 3 4 2 1 1
 2 3 4 3 1 1
 2 3 4 4 2 1
 2 3 5 1 1 1
 2 3 5 2 1 1
 2 3 5 3 2 1
 2 3 5 4 1 1
 2 3 6 1 1 1
 2 3 6 2 1 1
 2 3 6 3 2 1
 2 3 6 4 1 1
 2 3 7 1 2 1
 2 3 7 2 1 1
 2 3 7 3 1 1
 2 3 7 4 1 1
 2 3 8 1 2 1
 2 3 8 2 1 1
 2 3 8 3 1 1
 2 3 8 4 1 1
 2 3 9 1 1 1
 2 3 9 2 1 1
 2 3 9 3 1 1
 2 3 9 4 1 1
 2 3 10 1 1 1
 2 3 10 2 1 1
 2 3 10 3 1 1
 2 3 10 4 1 1
 2 3 11 1 1 1
 2 3 11 2 2 1
 2 3 11 3 1 1
 2 3 11 4 2 1
 2 3 12 1 2 1
 2 3 12 2 2 1
 2 3 12 3 1 1
 2 3 12 4 1 1
 2 3 13 1 1 1
 2 3 13 2 2 1
 2 3 13 3 2 1
 2 3 13 4 1 1
 2 3 14 1 1 1
 2 3 14 2 2 1
 2 3 14 3 1 1
 2 3 14 4 2 1
 2 3 15 1 1 1
 2 3 15 2 1 1
 2 3 15 3 1 1
 2 3 15 4 1 1
 2 3 16 1 2 1
 2 3 16 2 1 1
 2 3 16 3 2 1
 2 3 16 4 1 1
 2 3 17 1 2 1
 2 3 17 2 1 1
 2 3 17 3 2 1
 2 3 17 4 1 1
 2 3 18 1 2 1
 2 3 18 2 2 1
 2 3 18 3 2 1
 2 3 18 4 1 1
 2 3 19 1 1 1
 2 3 19 2 1 1
 2 3 19 3 1 1
 2 3 19 4 1 1
 2 3 20 1 1 1
 2 3 20 2 2 1
 2 3 20 3 1 1
 2 3 20 4 2 1
 2 3 21 1 1 1
 2 3 21 2 1 1
 2 3 21 3 2 1
 2 3 21 4 1 1
 2 3 22 1 1 1
 2 3 22 2 1 1
 2 3 22 3 1 1
 2 3 22 4 1 1
 2 3 23 1 1 1
 2 3 23 2 1 1
 2 3 23 3 1 1
 2 3 23 4 1 1
 2 3 24 1 2 1
 2 3 24 2 1 1
 2 3 24 3 1 1
 2 3 24 4 2 1
 2 3 25 1 2 1
 2 3 25 2 1 1
 2 3 25 3 1 1
 2 3 25 4 2 1
 2 3 26 1 2 1
 2 3 26 2 1 1
 2 3 26 3 1 1
 2 3 26 4 1 1
 2 3 27 1 1 1
 2 3 27 2 1 1
 2 3 27 3 1 1
 2 3 27 4 1 1
 2 3 28 1 1 1
 2 3 28 2 1 1
 2 3 28 3 1 1
 2 3 28 4 1 1
 2 3 29 1 1 1
 2 3 29 2 1 1
 2 3 29 3 1 1
 2 3 29 4 1 1
 2 3 30 1 2 1
 2 3 30 2 1 1
 2 3 30 3 2 1
 2 3 30 4 2 1
 2 3 31 1 2 1
 2 3 31 2 1 1
 2 3 31 3 2 1
 2 3 31 4 1 1
 2 3 32 1 2 1
 2 3 32 2 1 1
 2 3 32 3 2 1
 2 3 32 4 2 1
 2 4 1 1 2 1
 2 4 1 2 1 1
 2 4 1 3 1 1
 2 4 1 4 1 1
 2 4 2 1 1 1
 2 4 2 2 1 1
 2 4 2 3 2 1
 2 4 2 4 1 1
 2 4 3 1 1 1
 2 4 3 2 2 1
 2 4 3 3 2 1
 2 4 3 4 1 1
 2 4 4 1 2 1
 2 4 4 2 2 1
 2 4 4 3 2 1
 2 4 4 4 1 1
 2 4 5 1 1 1
 2 4 5 2 2 1
 2 4 5 3 1 1
 2 4 5 4 1 1
 2 4 6 1 2 1
 2 4 6 2 1 1
 2 4 6 3 1 1
 2 4 6 4 1 1
 2 4 7 1 1 1
 2 4 7 2 2 1
 2 4 7 3 2 1
 2 4 7 4 2 1
 2 4 8 1 1 1
 2 4 8 2 2 1
 2 4 8 3 1 1
 2 4 8 4 2 1
 2 4 9 1 1 1
 2 4 9 2 2 1
 2 4 9 3 1 1
 2 4 9 4 1 1
 2 4 10 1 2 1
 2 4 10 2 1 1
 2 4 10 3 1 1
 2 4 10 4 1 1
 2 4 11 1 1 1
 2 4 11 2 1 1
 2 4 11 3 1 1
 2 4 11 4 2 1
 2 4 12 1 1 1
 2 4 12 2 2 1
 2 4 12 3 1 1
 2 4 12 4 1 1
 2 4 13 1 2 1
 2 4 13 2 1 1
 2 4 13 3 1 1
 2 4 13 4 1 1
 2 4 14 1 1 1
 2 4 14 2 1 1
 2 4 14 3 1 1
 2 4 14 4 2 1
 2 4 15 1 1 1
 2 4 15 2 2 1
 2 4 15 3 1 1
 2 4 15 4 2 1
 2 4 16 1 1 1
 2 4 16 2 1 1
 2 4 16 3 1 1
 2 4 16 4 1 1
 2 4 17 1 2 1
 2 4 17 2 1 1
 2 4 17 3 1 1
 2 4 17 4 1 1
 2 4 18 1 1 1
 2 4 18 2 1 1
 2 4 18 3 2 1
 2 4 18 4 1 1
 2 4 19 1 2 1
 2 4 19 2 1 1
 2 4 19 3 1 1
 2 4 19 4 1 1
 2 4 20 1 1 1
 2 4 20 2 1 1
 2 4 20 3 1 1
 2 4 20 4 1 1
 2 4 21 1 1 1
 2 4 21 2 1 1
 2 4 21 3 2 1
 2 4 21 4 1 1
 2 4 22 1 1 1
 2 4 22 2 1 1
 2 4 22 3 2 1
 2 4 22 4 2 1
 2 4 23 1 1 1
 2 4 23 2 2 1
 2 4 23 3 1 1
 2 4 23 4 1 1
 2 4 24 1 1 1
 2 4 24 2 1 1
 2 4 24 3 1 1
 2 4 24 4 1 1
 2 4 25 1 1 1
 2 4 25 2 1 1
 2 4 25 3 1 1
 2 4 25 4 1 1
 2 4 26 1 2 1
 2 4 26 2 1 1
 2 4 26 3 1 1
 2 4 26 4 1 1
 2 4 27 1 1 1
 2 4 27 2 1 1
 2 4 27 3 1 1
 2 4 27 4 1 1
 2 4 28 1 2 1
 2 4 28 2 2 1
 2 4 28 3 1 1
 2 4 28 4 1 1
 2 4 29 1 1 1
 2 4 29 2 1 1
 2 4 29 3 1 1
 2 4 29 4 1 1
 2 4 30 1 2 1
 2 4 30 2 1 1
 2 4 30 3 2 1
 2 4 30 4 1 1
 2 4 31 1 2 1
 2 4 31 2 1 1
 2 4 31 3 1 1
 2 4 31 4 1 1
 2 4 32 1 1 1
 2 4 32 2 1 1
 2 4 32 3 1 1
 2 4 32 4 1 1
 2 5 1 1 1 1
 2 5 1 2 1 1
 2 5 1 3 2 1
 2 5 1 4 1 1
 2 5 2 1 2 1
 2 5 2 2 1 1
 2 5 2 3 1 1
 2 5 2 4 1 1
 2 5 3 1 2 1
 2 5 3 2 1 1
 2 5 3 3 1 1
 2 5 3 4 2 1
 2 5 4 1 1 1
 2 5 4 2 1 1
 2 5 4 3 1 1
 2 5 4 4 2 1
 2 5 5 1 1 1
 2 5 5 2 1 1
 2 5 5 3 1 1
 2 5 5 4 2 1
 2 5 6 1 2 1
 2 5 6 2 2 1
 2 5 6 3 1 1
 2 5 6 4 2 1
 2 5 7 1 1 1
 2 5 7 2 1 1
 2 5 7 3 1 1
 2 5 7 4 1 1
 2 5 8 1 1 1
 2 5 8 2 1 1
 2 5 8 3 1 1
 2 5 8 4 1 1
 2 5 9 1 1 1
 2 5 9 2 2 1
 2 5 9 3 1 1
 2 5 9 4 1 1
 2 5 10 1 2 1
 2 5 10 2 1 1
 2 5 10 3 1 1
 2 5 10 4 1 1
 2 5 11 1 2 1
 2 5 11 2 1 1
 2 5 11 3 2 1
 2 5 11 4 1 1
 2 5 12 1 1 1
 2 5 12 2 2 1
 2 5 12 3 2 1
 2 5 12 4 1 1
 2 5 13 1 1 1
 2 5 13 2 1 1
 2 5 13 3 1 1
 2 5 13 4 1 1
 2 5 14 1 1 1
 2 5 14 2 2 1
 2 5 14 3 2 1
 2 5 14 4 2 1
 2 5 15 1 2 1
 2 5 15 2 1 1
 2 5 15 3 2 1
 2 5 15 4 1 1
 2 5 16 1 1 1
 2 5 16 2 2 1
 2 5 16 3 1 1
 2 5 16 4 2 1
 2 5 17 1 1 1
 2 5 17 2 1 1
 2 5 17 3 2 1
 2 5 17 4 1 1
 2 5 18 1 2 1
 2 5 18 2 1 1
 2 5 18 3 1 1
 2 5 18 4 1 1
 2 5 19 1 2 1
 2 5 19 2 1 1
 2 5 19 3 2 1
 2 5 19 4 1 1
 2 5 20 1 1 1
 2 5 20 2 2 1
 2 5 20 3 1 1
 2 5 20 4 1 1
 2 5 21 1 1 1
 2 5 21 2 2 1
 2 5 21 3 1 1
 2 5 21 4 1 1
 2 5 22 1 2 1
 2 5 22 2 1 1
 2 5 22 3 2 1
 2 5 22 4 2 1
 2 5 23 1 2 1
 2 5 23 2 1 1
 2 5 23 3 1 1
 2 5 23 4 2 1
 2 5 24 1 2 1
 2 5 24 2 1 1
 2 5 24 3 1 1
 2 5 24 4 1 1
 2 5 25 1 1 1
 2 5 25 2 1 1
 2 5 25 3 1 1
 2 5 25 4 1 1
 2 5 26 1 1 1
 2 5 26 2 2 1
 2 5 26 3 1 1
 2 5 26 4 2 1
 2 5 27 1 2 1
 2 5 27 2 2 1
 2 5 27 3 1 1
 2 5 27 4 1 1
 2 5 28 1 2 1
 2 5 28 2 1 1
 2 5 28 3 2 1
 2 5 28 4 1 1
 2 5 29 1 1 1
 2 5 29 2 2 1
 2 5 29 3 1 1
 2 5 29 4 2 1
 2 5 30 1 1 1
 2 5 30 2 1 1
 2 5 30 3 1 1
 2 5 30 4 1 1
 2 5 31 1 1 1
 2 5 31 2 2 1
 2 5 31 3 1 1
 2 5 31 4 2 1
 2 5 32 1 1 1
 2 5 32 2 1 1
 2 5 32 3 2 1
 2 5 32 4 2 1
 2 6 1 1 1 1
 2 6 1 2 1 1
 2 6 1 3 2 1
 2 6 1 4 1 1
 2 6 2 1 1 1
 2 6 2 2 1 1
 2 6 2 3 1 1
 2 6 2 4 2 1
 2 6 3 1 2 1
 2 6 3 2 1 1
 2 6 3 3 1 1
 2 6 3 4 2 1
 2 6 4 1 2 1
 2 6 4 2 2 1
 2 6 4 3 2 1
 2 6 4 4 1 1
 2 6 5 1 2 1
 2 6 5 2 2 1
 2 6 5 3 1 1
 2 6 5 4 1 1
 2 6 6 1 2 1
 2 6 6 2 2 1
 2 6 6 3 2 1
 2 6 6 4 1 1
 2 6 7 1 1 1
 2 6 7 2 2 1
 2 6 7 3 1 1
 2 6 7 4 2 1
 2 6 8 1 1 1
 2 6 8 2 1 1
 2 6 8 3 2 1
 2 6 8 4 2 1
 2 6 9 1 2 1
 2 6 9 2 1 1
 2 6 9 3 2 1
 2 6 9 4 1 1
 2 6 10 1 1 1
 2 6 10 2 1 1
 2 6 10 3 1 1
 2 6 10 4 2 1
 2 6 11 1 1 1
 2 6 11 2 1 1
 2 6 11 3 1 1
 2 6 11 4 1 1
 2 6 12 1 2 1
 2 6 12 2 1 1
 2 6 12 3 1 1
 2 6 12 4 1 1
 2 6 13 1 1 1
 2 6 13 2 1 1
 2 6 13 3 1 1
 2 6 13 4 1 1
 2 6 14 1 1 1
 2 6 14 2 1 1
 2 6 14 3 1 1
 2 6 14 4 1 1
 2 6 15 1 1 1
 2 6 15 2 1 1
 2 6 15 3 1 1
 2 6 15 4 1 1
 2 6 16 1 1 1
 2 6 16 2 1 1
 2 6 16 3 1 1
 2 6 16 4 1 1
 2 6 17 1 1 1
 2 6 17 2 1 1
 2 6 17 3 1 1
 2 6 17 4 2 1
 2 6 18 1 1 1
 2 6 18 2 2 1
 2 6 18 3 2 1
 2 6 18 4 1 1
 2 6 19 1 2 1
 2 6 19 2 1 1
 2 6 19 3 2 1
 2 6 19 4 1 1
 2 6 20 1 1 1
 2 6 20 2 1 1
 2 6 20 3 1 1
 2 6 20 4 1 1
 2 6 21 1 2 1
 2 6 21 2 1 1
 2 6 21 3 1 1
 2 6 21 4 1 1
 2 6 22 1 1 1
 2 6 22 2 2 1
 2 6 22 3 1 1
 2 6 22 4 1 1
 2 6 23 1 1 1
 2 6 23 2 1 1
 2 6 23 3 2 1
 2 6 23 4 2 1
 2 6 24 1 2 1
 2 6 24 2 1 1
 2 6 24 3 2 1
 2 6 24 4 1 1
 2 6 25 1 1 1
 2 6 25 2 1 1
 2 6 25 3 1 1
 2 6 25 4 1 1
 2 6 26 1 2 1
 2 6 26 2 2 1
 2 6 26 3 1 1
 2 6 26 4 1 1
 2 6 27 1 2 1
 2 6 27 2 1 1
 2 6 27 3 2 1
 2 6 27 4 1 1
 2 6 28 1 1 1
 2 6 28 2 2 1
 2 6 28 3 1 1
 2 6 28 4 2 1
 2 6 29 1 2 1
 2 6 29 2 2 1
 2 6 29 3 2 1
 2 6 29 4 2 1
 2 6 30 1 2 1
 2 6 30 2 1 1
 2 6 30 3 1 1
 2 6 30 4 1 1
 2 6 31 1 1 1
 2 6 31 2 1 1
 2 6 31 3 2 1
 2 6 31 4 1 1
 2 6 32 1 2 1
 2 6 32 2 1 1
 2 6 32 3 2 1
 2 6 32 4 1 1
 2 7 1 1 2 1
 2 7 1 2 1 1
 2 7 1 3 2 1
 2 7 1 4 1 1
 2 7 2 1 2 1
 2 7 2 2 2 1
 2 7 2 3 1 1
 2 7 2 4 2 1
 2 7 3 1 1 1
 2 7 3 2 1 1
 2 7 3 3 1 1
 2 7 3 4 1 1
 2 7 4 1 1 1
 2 7 4 2 1 1
 2 7 4 3 2 1
 2 7 4 4 1 1
 2 7 5 1 1 1
 2 7 5 2 1 1
 2 7 5 3 1 1
 2 7 5 4 1 1
 2 7 6 1 1 1
 2 7 6 2 1 1
 2 7 6 3 1 1
 2 7 6 4 1 1
 2 7 7 1 1 1
 2 7 7 2 1 1
 2 7 7 3 1 1
 2 7 7 4 2 1
 2 7 8 1 1 1
 2 7 8 2 1 1
 2 7 8 3 2 1
 2 7 8 4 2 1
 2 7 9 1 1 1
 2 7 9 2 1 1
 2 7 9 3 1 1
 2 7 9 4 1 1
 2 7 10 1 1 1
 2 7 10 2 2 1
 2 7 10 3 1 1
 2 7 10 4 1 1
 2 7 11 1 2 1
 2 7 11 2 1 1
 2 7 11 3 1 1
 2 7 11 4 1 1
 2 7 12 1 1 1
 2 7 12 2 1 1
 2 7 12 3 1 1
 2 7 12 4 1 1
 2 7 13 1 1 1
 2 7 13 2 1 1
 2 7 13 3 2 1
 2 7 13 4 2 1
 2 7 14 1 1 1
 2 7 14 2 1 1
 2 7 14 3 1 1
 2 7 14 4 1 1
 2 7 15 1 2 1
 2 7 15 2 1 1
 2 7 15 3 2 1
 2 7 15 4 1 1
 2 7 16 1 1 1
 2 7 16 2 2 1
 2 7 16 3 1 1
 2 7 16 4 1 1
 2 7 17 1 1 1
 2 7 17 2 1 1
 2 7 17 3 2 1
 2 7 17 4 1 1
 2 7 18 1 2 1
 2 7 18 2 2 1
 2 7 18 3 2 1
 2 7 18 4 1 1
 2 7 19 1 1 1
 2 7 19 2 1 1
 2 7 19 3 1 1
 2 7 19 4 2 1
 2 7 20 1 1 1
 2 7 20 2 2 1
 2 7 20 3 2 1
 2 7 20 4 1 1
 2 7 21 1 1 1
 2 7 21 2 1 1
 2 7 21 3 2 1
 2 7 21 4 1 1
 2 7 22 1 2 1
 2 7 22 2 2 1
 2 7 22 3 2 1
 2 7 22 4 1 1
 2 7 23 1 2 1
 2 7 23 2 2 1
 2 7 23 3 2 1
 2 7 23 4 1 1
 2 7 24 1 1 1
 2 7 24 2 2 1
 2 7 24 3 2 1
 2 7 24 4 2 1
 2 7 25 1 1 1
 2 7 25 2 1 1
 2 7 25 3 2 1
 2 7 25 4 2 1
 2 7 26 1 2 1
 2 7 26 2 2 1
 2 7 26 3 1 1
 2 7 26 4 2 1
 2 7 27 1 2 1
 2 7 27 2 1 1
 2 7 27 3 1 1
 2 7 27 4 2 1
 2 7 28 1 1 1
 2 7 28 2 2 1
 2 7 28 3 2 1
 2 7 28 4 1 1
 2 7 29 1 2 1
 2 7 29 2 1 1
 2 7 29 3 2 1
 2 7 29 4 2 1
 2 7 30 1 2 1
 2 7 30 2 1 1
 2 7 30 3 2 1
 2 7 30 4 1 1
 2 7 31 1 2 1
 2 7 31 2 2 1
 2 7 31 3 1 1
 2 7 31 4 1 1
 2 7 32 1 1 1
 2 7 32 2 2 1
 2 7 32 3 2 1
 2 7 32 4 2 1
 2 8 1 1 1 1
 2 8 1 2 2 1
 2 8 1 3 1 1
 2 8 1 4 2 1
 2 8 2 1 1 1
 2 8 2 2 2 1
 2 8 2 3 2 1
 2 8 2 4 1 1
 2 8 3 1 1 1
 2 8 3 2 1 1
 2 8 3 3 1 1
 2 8 3 4 1 1
 2 8 4 1 1 1
 2 8 4 2 2 1
 2 8 4 3 2 1
 2 8 4 4 1 1
 2 8 5 1 2 1
 2 8 5 2 1 1
 2 8 5 3 1 1
 2 8 5 4 2 1
 2 8 6 1 1 1
 2 8 6 2 1 1
 2 8 6 3 2 1
 2 8 6 4 1 1
 2 8 7 1 1 1
 2 8 7 2 1 1
 2 8 7 3 2 1
 2 8 7 4 1 1
 2 8 8 1 2 1
 2 8 8 2 1 1
 2 8 8 3 2 1
 2 8 8 4 1 1
 2 8 9 1 1 1
 2 8 9 2 1 1
 2 8 9 3 1 1
 2 8 9 4 1 1
 2 8 10 1 1 1
 2 8 10 2 1 1
 2 8 10 3 1 1
 2 8 10 4 1 1
 2 8 11 1 1 1
 2 8 11 2 1 1
 2 8 11 3 1 1
 2 8 11 4 2 1
 2 8 12 1 2 1
 2 8 12 2 1 1
 2 8 12 3 1 1
 2 8 12 4 1 1
 2 8 13 1 1 1
 2 8 13 2 1 1
 2 8 13 3 2 1
 2 8 13 4 2 1
 2 8 14 1 1 1
 2 8 14 2 2 1
 2 8 14 3 1 1
 2 8 14 4 1 1
 2 8 15 1 2 1
 2 8 15 2 2 1
 2 8 15 3 1 1
 2 8 15 4 1 1
 2 8 16 1 1 1
 2 8 16 2 2 1
 2 8 16 3 1 1
 2 8 16 4 2 1
 2 8 17 1 2 1
 2 8 17 2 1 1
 2 8 17 3 2 1
 2 8 17 4 1 1
 2 8 18 1 2 1
 2 8 18 2 1 1
 2 8 18 3 1 1
 2 8 18 4 2 1
 2 8 19 1 2 1
 2 8 19 2 1 1
 2 8 19 3 1 1
 2 8 19 4 1 1
 2 8 20 1 2 1
 2 8 20 2 2 1
 2 8 20 3 1 1
 2 8 20 4 2 1
 2 8 21 1 1 1
 2 8 21 2 2 1
 2 8 21 3 2 1
 2 8 21 4 2 1
 2 8 22 1 1 1
 2 8 22 2 1 1
 2 8 22 3 1 1
 2 8 22 4 1 1
 2 8 23 1 1 1
 2 8 23 2 2 1
 2 8 23 3 1 1
 2 8 23 4 1 1
 2 8 24 1 1 1
 2 8 24 2 1 1
 2 8 24 3 2 1
 2 8 24 4 1 1
 2 8 25 1 1 1
 2 8 25 2 2 1
 2 8 25 3 1 1
 2 8 25 4 1 1
 2 8 26 1 1 1
 2 8 26 2 1 1
 2 8 26 3 1 1
 2 8 26 4 1 1
 2 8 27 1 2 1
 2 8 27 2 1 1
 2 8 27 3 1 1
 2 8 27 4 1 1
 2 8 28 1 1 1
 2 8 28 2 1 1
 2 8 28 3 1 1
 2 8 28 4 1 1
 2 8 29 1 1 1
 2 8 29 2 1 1
 2 8 29 3 2 1
 2 8 29 4 1 1
 2 8 30 1 1 1
 2 8 30 2 1 1
 2 8 30 3 1 1
 2 8 30 4 1 1
 2 8 31 1 1 1
 2 8 31 2 2 1
 2 8 31 3 1 1
 2 8 31 4 2 1
 2 8 32 1 1 1
 2 8 32 2 1 1
 2 8 32 3 1 1
 2 8 32 4 1 1
 2 9 1 1 2 1
 2 9 1 2 1 1
 2 9 1 3 1 1
 2 9 1 4 1 1
 2 9 2 1 1 1
 2 9 2 2 1 1
 2 9 2 3 1 1
 2 9 2 4 1 1
 2 9 3 1 2 1
 2 9 3 2 1 1
 2 9 3 3 1 1
 2 9 3 4 1 1
 2 9 4 1 1 1
 2 9 4 2 2 1
 2 9 4 3 2 1
 2 9 4 4 1 1
 2 9 5 1 1 1
 2 9 5 2 1 1
 2 9 5 3 1 1
 2 9 5 4 1 1
 2 9 6 1 1 1
 2 9 6 2 1 1
 2 9 6 3 2 1
 2 9 6 4 1 1
 2 9 7 1 1 1
 2 9 7 2 1 1
 2 9 7 3 1 1
 2 9 7 4 1 1
 2 9 8 1 1 1
 2 9 8 2 1 1
 2 9 8 3 1 1
 2 9 8 4 2 1
 2 9 9 1 2 1
 2 9 9 2 1 1
 2 9 9 3 2 1
 2 9 9 4 1 1
 2 9 10 1 2 1
 2 9 10 2 1 1
 2 9 10 3 1 1
 2 9 10 4 2 1
 2 9 11 1 2 1
 2 9 11 2 1 1
 2 9 11 3 2 1
 2 9 11 4 2 1
 2 9 12 1 1 1
 2 9 12 2 1 1
 2 9 12 3 1 1
 2 9 12 4 1 1
 2 9 13 1 1 1
 2 9 13 2 2 1
 2 9 13 3 2 1
 2 9 13 4 2 1
 2 9 14 1 2 1
 2 9 14 2 2 1
 2 9 14 3 2 1
 2 9 14 4 2 1
 2 9 15 1 1 1
 2 9 15 2 2 1
 2 9 15 3 1 1
 2 9 15 4 1 1
 2 9 16 1 2 1
 2 9 16 2 1 1
 2 9 16 3 1 1
 2 9 16 4 1 1
 2 9 17 1 1 1
 2 9 17 2 1 1
 2 9 17 3 1 1
 2 9 17 4 2 1
 2 9 18 1 1 1
 2 9 18 2 1 1
 2 9 18 3 1 1
 2 9 18 4 1 1
 2 9 19 1 2 1
 2 9 19 2 2 1
 2 9 19 3 1 1
 2 9 19 4 1 1
 2 9 20 1 2 1
 2 9 20 2 1 1
 2 9 20 3 1 1
 2 9 20 4 1 1
 2 9 21 1 2 1
 2 9 21 2 1 1
 2 9 21 3 1 1
 2 9 21 4 1 1
 2 9 22 1 1 1
 2 9 22 2 2 1
 2 9 22 3 1 1
 2 9 22 4 2 1
 2 9 23 1 1 1
 2 9 23 2 1 1
 2 9 23 3 2 1
 2 9 23 4 2 1
 2 9 24 1 1 1
 2 9 24 2 1 1
 2 9 24 3 2 1
 2 9 24 4 2 1
 2 9 25 1 2 1
 2 9 25 2 1 1
 2 9 25 3 2 1
 2 9 25 4 1 1
 2 9 26 1 2 1
 2 9 26 2 1 1
 2 9 26 3 1 1
 2 9 26 4 1 1
 2 9 27 1 2 1
 2 9 27 2 1 1
 2 9 27 3 1 1
 2 9 27 4 1 1
 2 9 28 1 2 1
 2 9 28 2 2 1
 2 9 28 3 1 1
 2 9 28 4 2 1
 2 9 29 1 2 1
 2 9 29 2 1 1
 2 9 29 3 1 1
 2 9 29 4 1 1
 2 9 30 1 1 1
 2 9 30 2 1 1
 2 9 30 3 2 1
 2 9 30 4 1 1
 2 9 31 1 1 1
 2 9 31 2 1 1
 2 9 31 3 1 1
 2 9 31 4 1 1
 2 9 32 1 2 1
 2 9 32 2 2 1
 2 9 32 3 1 1
 2 9 32 4 1 1
 2 10 1 1 2 1
 2 10 1 2 1 1
 2 10 1 3 1 1
 2 10 1 4 1 1
 2 10 2 1 1 1
 2 10 2 2 1 1
 2 10 2 3 1 1
 2 10 2 4 1 1
 2 10 3 1 1 1
 2 10 3 2 1 1
 2 10 3 3 1 1
 2 10 3 4 1 1
 2 10 4 1 1 1
 2 10 4 2 1 1
 2 10 4 3 1 1
 2 10 4 4 1 1
 2 10 5 1 2 1
 2 10 5 2 2 1
 2 10 5 3 2 1
 2 10 5 4 1 1
 2 10 6 1 2 1
 2 10 6 2 2 1
 2 10 6 3 2 1
 2 10 6 4 1 1
 2 10 7 1 1 1
 2 10 7 2 1 1
 2 10 7 3 1 1
 2 10 7 4 2 1
 2 10 8 1 1 1
 2 10 8 2 1 1
 2 10 8 3 1 1
 2 10 8 4 2 1
 2 10 9 1 2 1
 2 10 9 2 1 1
 2 10 9 3 1 1
 2 10 9 4 2 1
 2 10 10 1 2 1
 2 10 10 2 2 1
 2 10 10 3 1 1
 2 10 10 4 2 1
 2 10 11 1 1 1
 2 10 11 2 1 1
 2 10 11 3 2 1
 2 10 11 4 1 1
 2 10 12 1 1 1
 2 10 12 2 1 1
 2 10 12 3 2 1
 2 10 12 4 1 1
 2 10 13 1 1 1
 2 10 13 2 1 1
 2 10 13 3 1 1
 2 10 13 4 2 1
 2 10 14 1 1 1
 2 10 14 2 1 1
 2 10 14 3 1 1
 2 10 14 4 1 1
 2 10 15 1 2 1
 2 10 15 2 2 1
 2 10 15 3 1 1
 2 10 15 4 1 1
 2 10 16 1 1 1
 2 10 16 2 2 1
 2 10 16 3 1 1
 2 10 16 4 1 1
 2 10 17 1 1 1
 2 10 17 2 1 1
 2 10 17 3 1 1
 2 10 17 4 2 1
 2 10 18 1 1 1
 2 10 18 2 1 1
 2 10 18 3 2 1
 2 10 18 4 2 1
 2 10 19 1 2 1
 2 10 19 2 2 1
 2 10 19 3 2 1
 2 10 19 4 1 1
 2 10 20 1 2 1
 2 10 20 2 1 1
 2 10 20 3 2 1
 2 10 20 4 1 1
 2 10 21 1 2 1
 2 10 21 2 1 1
 2 10 21 3 1 1
 2 10 21 4 2 1
 2 10 22 1 2 1
 2 10 22 2 1 1
 2 10 22 3 2 1
 2 10 22 4 1 1
 2 10 23 1 1 1
 2 10 23 2 2 1
 2 10 23 3 1 1
 2 10 23 4 2 1
 2 10 24 1 1 1
 2 10 24 2 2 1
 2 10 24 3 2 1
 2 10 24 4 1 1
 2 10 25 1 2 1
 2 10 25 2 1 1
 2 10 25 3 1 1
 2 10 25 4 2 1
 2 10 26 1 2 1
 2 10 26 2 2 1
 2 10 26 3 1 1
 2 10 26 4 1 1
 2 10 27 1 1 1
 2 10 27 2 1 1
 2 10 27 3 1 1
 2 10 27 4 1 1
 2 10 28 1 1 1
 2 10 28 2 1 1
 2 10 28 3 1 1
 2 10 28 4 2 1
 2 10 29 1 1 1
 2 10 29 2 2 1
 2 10 29 3 2 1
 2 10 29 4 1 1
 2 10 30 1 1 1
 2 10 30 2 1 1
 2 10 30 3 1 1
 2 10 30 4 1 1
 2 10 31 1 2 1
 2 10 31 2 1 1
 2 10 31 3 1 1
 2 10 31 4 1 1
 2 10 32 1 1 1
 2 10 32 2 1 1
 2 10 32 3 2 1
 2 10 32 4 1 1
 2 11 1 1 2 1
 2 11 1 2 2 1
 2 11 1 3 1 1
 2 11 1 4 2 1
 2 11 2 1 1 1
 2 11 2 2 1 1
 2 11 2 3 1 1
 2 11 2 4 2 1
 2 11 3 1 1 1
 2 11 3 2 1 1
 2 11 3 3 1 1
 2 11 3 4 2 1
 2 11 4 1 2 1
 2 11 4 2 1 1
 2 11 4 3 2 1
 2 11 4 4 2 1
 2 11 5 1 1 1
 2 11 5 2 1 1
 2 11 5 3 1 1
 2 11 5 4 1 1
 2 11 6 1 1 1
 2 11 6 2 2 1
 2 11 6 3 1 1
 2 11 6 4 2 1
 2 11 7 1 1 1
 2 11 7 2 2 1
 2 11 7 3 2 1
 2 11 7 4 1 1
 2 11 8 1 1 1
 2 11 8 2 1 1
 2 11 8 3 1 1
 2 11 8 4 1 1
 2 11 9 1 2 1
 2 11 9 2 2 1
 2 11 9 3 1 1
 2 11 9 4 1 1
 2 11 10 1 2 1
 2 11 10 2 1 1
 2 11 10 3 1 1
 2 11 10 4 2 1
 2 11 11 1 1 1
 2 11 11 2 1 1
 2 11 11 3 2 1
 2 11 11 4 2 1
 2 11 12 1 1 1
 2 11 12 2 2 1
 2 11 12 3 1 1
 2 11 12 4 1 1
 2 11 13 1 1 1
 2 11 13 2 1 1
 2 11 13 3 1 1
 2 11 13 4 2 1
 2 11 14 1 1 1
 2 11 14 2 1 1
 2 11 14 3 1 1
 2 11 14 4 2 1
 2 11 15 1 1 1
 2 11 15 2 1 1
 2 11 15 3 2 1
 2 11 15 4 1 1
 2 11 16 1 1 1
 2 11 16 2 1 1
 2 11 16 3 2 1
 2 11 16 4 1 1
 2 11 17 1 1 1
 2 11 17 2 2 1
 2 11 17 3 2 1
 2 11 17 4 1 1
 2 11 18 1 1 1
 2 11 18 2 1 1
 2 11 18 3 2 1
 2 11 18 4 1 1
 2 11 19 1 1 1
 2 11 19 2 1 1
 2 11 19 3 2 1
 2 11 19 4 1 1
 2 11 20 1 1 1
 2 11 20 2 2 1
 2 11 20 3 1 1
 2 11 20 4 1 1
 2 11 21 1 1 1
 2 11 21 2 2 1
 2 11 21 3 1 1
 2 11 21 4 1 1
 2 11 22 1 1 1
 2 11 22 2 2 1
 2 11 22 3 2 1
 2 11 22 4 1 1
 2 11 23 1 2 1
 2 11 23 2 2 1
 2 11 23 3 1 1
 2 11 23 4 1 1
 2 11 24 1 2 1
 2 11 24 2 1 1
 2 11 24 3 1 1
 2 11 24 4 1 1
 2 11 25 1 1 1
 2 11 25 2 2 1
 2 11 25 3 1 1
 2 11 25 4 1 1
 2 11 26 1 2 1
 2 11 26 2 1 1
 2 11 26 3 1 1
 2 11 26 4 2 1
 2 11 27 1 1 1
 2 11 27 2 1 1
 2 11 27 3 1 1
 2 11 27 4 1 1
 2 11 28 1 1 1
 2 11 28 2 1 1
 2 11 28 3 1 1
 2 11 28 4 1 1
 2 11 29 1 2 1
 2 11 29 2 1 1
 2 11 29 3 1 1
 2 11 29 4 2 1
 2 11 30 1 1 1
 2 11 30 2 2 1
 2 11 30 3 1 1
 2 11 30 4 1 1
 2 11 31 1 2 1
 2 11 31 2 1 1
 2 11 31 3 2 1
 2 11 31 4 2 1
 2 11 32 1 2 1
 2 11 32 2 1 1
 2 11 32 3 2 1
 2 11 32 4 1 1
 2 12 1 1 1 1
 2 12 1 2 1 1
 2 12 1 3 1 1
 2 12 1 4 1 1
 2 12 2 1 1 1
 2 12 2 2 1 1
 2 12 2 3 1 1
 2 12 2 4 1 1
 2 12 3 1 1 1
 2 12 3 2 1 1
 2 12 3 3 1 1
 2 12 3 4 1 1
 2 12 4 1 2 1
 2 12 4 2 1 1
 2 12 4 3 1 1
 2 12 4 4 1 1
 2 12 5 1 1 1
 2 12 5 2 1 1
 2 12 5 3 2 1
 2 12 5 4 2 1
 2 12 6 1 2 1
 2 12 6 2 1 1
 2 12 6 3 1 1
 2 12 6 4 1 1
 2 12 7 1 1 1
 2 12 7 2 1 1
 2 12 7 3 1 1
 2 12 7 4 1 1
 2 12 8 1 1 1
 2 12 8 2 2 1
 2 12 8 3 1 1
 2 12 8 4 2 1
 2 12 9 1 1 1
 2 12 9 2 2 1
 2 12 9 3 1 1
 2 12 9 4 2 1
 2 12 10 1 2 1
 2 12 10 2 1 1
 2 12 10 3 1 1
 2 12 10 4 1 1
 2 12 11 1 1 1
 2 12 11 2 2 1
 2 12 11 3 2 1
 2 12 11 4 2 1
 2 12 12 1 2 1
 2 12 12 2 2 1
 2 12 12 3 1 1
 2 12 12 4 1 1
 2 12 13 1 1 1
 2 12 13 2 2 1
 2 12 13 3 1 1
 2 12 13 4 1 1
 2 12 14 1 1 1
 2 12 14 2 1 1
 2 12 14 3 1 1
 2 12 14 4 1 1
 2 12 15 1 1 1
 2 12 15 2 2 1
 2 12 15 3 1 1
 2 12 15 4 2 1
 2 12 16 1 1 1
 2 12 16 2 1 1
 2 12 16 3 2 1
 2 12 16 4 1 1
 2 12 17 1 2 1
 2 12 17 2 1 1
 2 12 17 3 2 1
 2 12 17 4 1 1
 2 12 18 1 1 1
 2 12 18 2 1 1
 2 12 18 3 1 1
 2 12 18 4 1 1
 2 12 19 1 1 1
 2 12 19 2 2 1
 2 12 19 3 1 1
 2 12 19 4 1 1
 2 12 20 1 2 1
 2 12 20 2 1 1
 2 12 20 3 1 1
 2 12 20 4 1 1
 2 12 21 1 1 1
 2 12 21 2 1 1
 2 12 21 3 1 1
 2 12 21 4 1 1
 2 12 22 1 1 1
 2 12 22 2 1 1
 2 12 22 3 2 1
 2 12 22 4 1 1
 2 12 23 1 1 1
 2 12 23 2 2 1
 2 12 23 3 1 1
 2 12 23 4 1 1
 2 12 24 1 1 1
 2 12 24 2 2 1
 2 12 24 3 2 1
 2 12 24 4 1 1
 2 12 25 1 1 1
 2 12 25 2 2 1
 2 12 25 3 1 1
 2 12 25 4 1 1
 2 12 26 1 1 1
 2 12 26 2 1 1
 2 12 26 3 1 1
 2 12 26 4 1 1
 2 12 27 1 2 1
 2 12 27 2 1 1
 2 12 27 3 1 1
 2 12 27 4 2 1
 2 12 28 1 1 1
 2 12 28 2 1 1
 2 12 28 3 1 1
 2 12 28 4 1 1
 2 12 29 1 1 1
 2 12 29 2 1 1
 2 12 29 3 2 1
 2 12 29 4 2 1
 2 12 30 1 2 1
 2 12 30 2 1 1
 2 12 30 3 1 1
 2 12 30 4 1 1
 2 12 31 1 1 1
 2 12 31 2 1 1
 2 12 31 3 1 1
 2 12 31 4 1 1
 2 12 32 1 2 1
 2 12 32 2 1 1
 2 12 32 3 1 1
 2 12 32 4 2 1
 2 13 1 1 2 1
 2 13 1 2 1 1
 2 13 1 3 1 1
 2 13 1 4 1 1
 2 13 2 1 1 1
 2 13 2 2 1 1
 2 13 2 3 1 1
 2 13 2 4 1 1
 2 13 3 1 1 1
 2 13 3 2 2 1
 2 13 3 3 2 1
 2 13 3 4 1 1
 2 13 4 1 1 1
 2 13 4 2 1 1
 2 13 4 3 2 1
 2 13 4 4 2 1
 2 13 5 1 1 1
 2 13 5 2 1 1
 2 13 5 3 1 1
 2 13 5 4 1 1
 2 13 6 1 2 1
 2 13 6 2 1 1
 2 13 6 3 2 1
 2 13 6 4 1 1
 2 13 7 1 1 1
 2 13 7 2 1 1
 2 13 7 3 2 1
 2 13 7 4 1 1
 2 13 8 1 2 1
 2 13 8 2 1 1
 2 13 8 3 1 1
 2 13 8 4 2 1
 2 13 9 1 1 1
 2 13 9 2 1 1
 2 13 9 3 1 1
 2 13 9 4 2 1
 2 13 10 1 1 1
 2 13 10 2 2 1
 2 13 10 3 1 1
 2 13 10 4 1 1
 2 13 11 1 1 1
 2 13 11 2 1 1
 2 13 11 3 1 1
 2 13 11 4 2 1
 2 13 12 1 1 1
 2 13 12 2 2 1
 2 13 12 3 2 1
 2 13 12 4 2 1
 2 13 13 1 1 1
 2 13 13 2 2 1
 2 13 13 3 2 1
 2 13 13 4 2 1
 2 13 14 1 1 1
 2 13 14 2 2 1
 2 13 14 3 1 1
 2 13 14 4 1 1
 2 13 15 1 1 1
 2 13 15 2 1 1
 2 13 15 3 1 1
 2 13 15 4 1 1
 2 13 16 1 2 1
 2 13 16 2 2 1
 2 13 16 3 1 1
 2 13 16 4 1 1
 2 13 17 1 1 1
 2 13 17 2 2 1
 2 13 17 3 2 1
 2 13 17 4 1 1
 2 13 18 1 2 1
 2 13 18 2 2 1
 2 13 18 3 1 1
 2 13 18 4 1 1
 2 13 19 1 1 1
 2 13 19 2 1 1
 2 13 19 3 1 1
 2 13 19 4 1 1
 2 13 20 1 2 1
 2 13 20 2 2 1
 2 13 20 3 1 1
 2 13 20 4 1 1
 2 13 21 1 1 1
 2 13 21 2 2 1
 2 13 21 3 1 1
 2 13 21 4 1 1
 2 13 22 1 1 1
 2 13 22 2 1 1
 2 13 22 3 2 1
 2 13 22 4 1 1
 2 13 23 1 1 1
 2 13 23 2 1 1
 2 13 23 3 2 1
 2 13 23 4 1 1
 2 13 24 1 2 1
 2 13 24 2 2 1
 2 13 24 3 1 1
 2 13 24 4 1 1
 2 13 25 1 1 1
 2 13 25 2 1 1
 2 13 25 3 1 1
 2 13 25 4 1 1
 2 13 26 1 2 1
 2 13 26 2 1 1
 2 13 26 3 1 1
 2 13 26 4 1 1
 2 13 27 1 1 1
 2 13 27 2 1 1
 2 13 27 3 2 1
 2 13 27 4 1 1
 2 13 28 1 2 1
 2 13 28 2 1 1
 2 13 28 3 2 1
 2 13 28 4 1 1
 2 13 29 1 1 1
 2 13 29 2 1 1
 2 13 29 3 2 1
 2 13 29 4 1 1
 2 13 30 1 1 1
 2 13 30 2 2 1
 2 13 30 3 1 1
 2 13 30 4 1 1
 2 13 31 1 1 1
 2 13 31 2 1 1
 2 13 31 3 2 1
 2 13 31 4 1 1
 2 13 32 1 1 1
 2 13 32 2 2 1
 2 13 32 3 1 1
 2 13 32 4 1 1
 2 14 1 1 1 1
 2 14 1 2 2 1
 2 14 1 3 1 1
 2 14 1 4 1 1
 2 14 2 1 2 1
 2 14 2 2 1 1
 2 14 2 3 2 1
 2 14 2 4 1 1
 2 14 3 1 1 1
 2 14 3 2 2 1
 2 14 3 3 1 1
 2 14 3 4 1 1
 2 14 4 1 1 1
 2 14 4 2 2 1
 2 14 4 3 1 1
 2 14 4 4 1 1
 2 14 5 1 1 1
 2 14 5 2 1 1
 2 14 5 3 1 1
 2 14 5 4 1 1
 2 14 6 1 2 1
 2 14 6 2 1 1
 2 14 6 3 1 1
 2 14 6 4 2 1
 2 14 7 1 1 1
 2 14 7 2 2 1
 2 14 7 3 1 1
 2 14 7 4 1 1
 2 14 8 1 1 1
 2 14 8 2 1 1
 2 14 8 3 1 1
 2 14 8 4 2 1
 2 14 9 1 1 1
 2 14 9 2 2 1
 2 14 9 3 1 1
 2 14 9 4 1 1
 2 14 10 1 1 1
 2 14 10 2 1 1
 2 14 10 3 1 1
 2 14 10 4 2 1
 2 14 11 1 1 1
 2 14 11 2 1 1
 2 14 11 3 1 1
 2 14 11 4 1 1
 2 14 12 1 1 1
 2 14 12 2 2 1
 2 14 12 3 1 1
 2 14 12 4 2 1
 2 14 13 1 2 1
 2 14 13 2 1 1
 2 14 13 3 2 1
 2 14 13 4 2 1
 2 14 14 1 1 1
 2 14 14 2 1 1
 2 14 14 3 2 1
 2 14 14 4 2 1
 2 14 15 1 1 1
 2 14 15 2 1 1
 2 14 15 3 1 1
 2 14 15 4 2 1
 2 14 16 1 1 1
 2 14 16 2 2 1
 2 14 16 3 1 1
 2 14 16 4 2 1
 2 14 17 1 1 1
 2 14 17 2 2 1
 2 14 17 3 1 1
 2 14 17 4 1 1
 2 14 18 1 2 1
 2 14 18 2 1 1
 2 14 18 3 1 1
 2 14 18 4 1 1
 2 14 19 1 2 1
 2 14 19 2 2 1
 2 14 19 3 1 1
 2 14 19 4 1 1
 2 14 20 1 1 1
 2 14 20 2 2 1
 2 14 20 3 2 1
 2 14 20 4 1 1
 2 14 21 1 1 1
 2 14 21 2 1 1
 2 14 21 3 1 1
 2 14 21 4 1 1
 2 14 22 1 1 1
 2 14 22 2 1 1
 2 14 22 3 1 1
 2 14 22 4 2 1
 2 14 23 1 1 1
 2 14 23 2 2 1
 2 14 23 3 1 1
 2 14 23 4 1 1
 2 14 24 1 2 1
 2 14 24 2 2 1
 2 14 24 3 1 1
 2 14 24 4 1 1
 2 14 25 1 2 1
 2 14 25 2 1 1
 2 14 25 3 1 1
 2 14 25 4 1 1
 2 14 26 1 2 1
 2 14 26 2 1 1
 2 14 26 3 2 1
 2 14 26 4 2 1
 2 14 27 1 1 1
 2 14 27 2 2 1
 2 14 27 3 1 1
 2 14 27 4 1 1
 2 14 28 1 2 1
 2 14 28 2 2 1
 2 14 28 3 2 1
 2 14 28 4 2 1
 2 14 29 1 2 1
 2 14 29 2 1 1
 2 14 29 3 2 1
 2 14 29 4 2 1
 2 14 30 1 1 1
 2 14 30 2 1 1
 2 14 30 3 2 1
 2 14 30 4 1 1
 2 14 31 1 1 1
 2 14 31 2 1 1
 2 14 31 3 1 1
 2 14 31 4 2 1
 2 14 32 1 1 1
 2 14 32 2 1 1
 2 14 32 3 2 1
 2 14 32 4 1 1
 2 15 1 1 1 1
 2 15 1 2 2 1
 2 15 1 3 1 1
 2 15 1 4 1 1
 2 15 2 1 2 1
 2 15 2 2 2 1
 2 15 2 3 1 1
 2 15 2 4 2 1
 2 15 3 1 2 1
 2 15 3 2 1 1
 2 15 3 3 1 1
 2 15 3 4 1 1
 2 15 4 1 1 1
 2 15 4 2 1 1
 2 15 4 3 1 1
 2 15 4 4 1 1
 2 15 5 1 1 1
 2 15 5 2 2 1
 2 15 5 3 2 1
 2 15 5 4 1 1
 2 15 6 1 1 1
 2 15 6 2 1 1
 2 15 6 3 1 1
 2 15 6 4 1 1
 2 15 7 1 2 1
 2 15 7 2 1 1
 2 15 7 3 2 1
 2 15 7 4 1 1
 2 15 8 1 2 1
 2 15 8 2 2 1
 2 15 8 3 1 1
 2 15 8 4 1 1
 2 15 9 1 1 1
 2 15 9 2 1 1
 2 15 9 3 1 1
 2 15 9 4 1 1
 2 15 10 1 1 1
 2 15 10 2 2 1
 2 15 10 3 1 1
 2 15 10 4 2 1
 2 15 11 1 2 1
 2 15 11 2 2 1
 2 15 11 3 1 1
 2 15 11 4 1 1
 2 15 12 1 2 1
 2 15 12 2 1 1
 2 15 12 3 1 1
 2 15 12 4 2 1
 2 15 13 1 1 1
 2 15 13 2 1 1
 2 15 13 3 1 1
 2 15 13 4 2 1
 2 15 14 1 1 1
 2 15 14 2 2 1
 2 15 14 3 1 1
 2 15 14 4 1 1
 2 15 15 1 2 1
 2 15 15 2 1 1
 2 15 15 3 1 1
 2 15 15 4 1 1
 2 15 16 1 2 1
 2 15 16 2 2 1
 2 15 16 3 2 1
 2 15 16 4 1 1
 2 15 17 1 1 1
 2 15 17 2 1 1
 2 15 17 3 1 1
 2 15 17 4 1 1
 2 15 18 1 1 1
 2 15 18 2 1 1
 2 15 18 3 1 1
 2 15 18 4 2 1
 2 15 19 1 2 1
 2 15 19 2 1 1
 2 15 19 3 2 1
 2 15 19 4 1 1
 2 15 20 1 1 1
 2 15 20 2 1 1
 2 15 20 3 1 1
 2 15 20 4 1 1
 2 15 21 1 1 1
 2 15 21 2 1 1
 2 15 21 3 1 1
 2 15 21 4 1 1
 2 15 22 1 1 1
 2 15 22 2 1 1
 2 15 22 3 1 1
 2 15 22 4 2 1
 2 15 23 1 2 1
 2 15 23 2 1 1
 2 15 23 3 1 1
 2 15 23 4 2 1
 2 15 24 1 1 1
 2 15 24 2 1 1
 2 15 24 3 1 1
 2 15 24 4 1 1
 2 15 25 1 1 1
 2 15 25 2 1 1
 2 15 25 3 1 1
 2 15 25 4 2 1
 2 15 26 1 1 1
 2 15 26 2 1 1
 2 15 26 3 1 1
 2 15 26 4 2 1
 2 15 27 1 1 1
 2 15 27 2 2 1
 2 15 27 3 1 1
 2 15 27 4 1 1
 2 15 28 1 1 1
 2 15 28 2 1 1
 2 15 28 3 1 1
 2 15 28 4 1 1
 2 15 29 1 1 1
 2 15 29 2 1 1
 2 15 29 3 1 1
 2 15 29 4 2 1
 2 15 30 1 2 1
 2 15 30 2 2 1
 2 15 30 3 1 1
 2 15 30 4 2 1
 2 15 31 1 1 1
 2 15 31 2 1 1
 2 15 31 3 2 1
 2 15 31 4 2 1
 2 15 32 1 1 1
 2 15 32 2 1 1
 2 15 32 3 1 1
 2 15 32 4 1 1
 2 16 1 1 1 1
 2 16 1 2 2 1
 2 16 1 3 1 1
 2 16 1 4 2 1
 2 16 2 1 1 1
 2 16 2 2 1 1
 2 16 2 3 1 1
 2 16 2 4 1 1
 2 16 3 1 2 1
 2 16 3 2 2 1
 2 16 3 3 2 1
 2 16 3 4 1 1
 2 16 4 1 1 1
 2 16 4 2 2 1
 2 16 4 3 2 1
 2 16 4 4 1 1
 2 16 5 1 2 1
 2 16 5 2 1 1
 2 16 5 3 2 1
 2 16 5 4 1 1
 2 16 6 1 1 1
 2 16 6 2 1 1
 2 16 6 3 1 1
 2 16 6 4 2 1
 2 16 7 1 2 1
 2 16 7 2 1 1
 2 16 7 3 1 1
 2 16 7 4 2 1
 2 16 8 1 1 1
 2 16 8 2 1 1
 2 16 8 3 1 1
 2 16 8 4 1 1
 2 16 9 1 1 1
 2 16 9 2 2 1
 2 16 9 3 1 1
 2 16 9 4 1 1
 2 16 10 1 1 1
 2 16 10 2 2 1
 2 16 10 3 1 1
 2 16 10 4 1 1
 2 16 11 1 1 1
 2 16 11 2 2 1
 2 16 11 3 1 1
 2 16 11 4 2 1
 2 16 12 1 1 1
 2 16 12 2 2 1
 2 16 12 3 2 1
 2 16 12 4 1 1
 2 16 13 1 1 1
 2 16 13 2 1 1
 2 16 13 3 2 1
 2 16 13 4 1 1
 2 16 14 1 2 1
 2 16 14 2 1 1
 2 16 14 3 1 1
 2 16 14 4 2 1
 2 16 15 1 2 1
 2 16 15 2 1 1
 2 16 15 3 1 1
 2 16 15 4 2 1
 2 16 16 1 1 1
 2 16 16 2 2 1
 2 16 16 3 2 1
 2 16 16 4 1 1
 2 16 17 1 1 1
 2 16 17 2 1 1
 2 16 17 3 2 1
 2 16 17 4 2 1
 2 16 18 1 1 1
 2 16 18 2 1 1
 2 16 18 3 2 1
 2 16 18 4 1 1
 2 16 19 1 1 1
 2 16 19 2 1 1
 2 16 19 3 2 1
 2 16 19 4 2 1
 2 16 20 1 1 1
 2 16 20 2 1 1
 2 16 20 3 1 1
 2 16 20 4 2 1
 2 16 21 1 2 1
 2 16 21 2 1 1
 2 16 21 3 2 1
 2 16 21 4 2 1
 2 16 22 1 1 1
 2 16 22 2 1 1
 2 16 22 3 2 1
 2 16 22 4 1 1
 2 16 23 1 1 1
 2 16 23 2 1 1
 2 16 23 3 1 1
 2 16 23 4 1 1
 2 16 24 1 1 1
 2 16 24 2 1 1
 2 16 24 3 1 1
 2 16 24 4 1 1
 2 16 25 1 1 1
 2 16 25 2 2 1
 2 16 25 3 2 1
 2 16 25 4 1 1
 2 16 26 1 2 1
 2 16 26 2 1 1
 2 16 26 3 1 1
 2 16 26 4 2 1
 2 16 27 1 1 1
 2 16 27 2 1 1
 2 16 27 3 2 1
 2 16 27 4 1 1
 2 16 28 1 2 1
 2 16 28 2 2 1
 2 16 28 3 1 1
 2 16 28 4 1 1
 2 16 29 1 2 1
 2 16 29 2 1 1
 2 16 29 3 1 1
 2 16 29 4 2 1
 2 16 30 1 1 1
 2 16 30 2 1 1
 2 16 30 3 1 1
 2 16 30 4 2 1
 2 16 31 1 1 1
 2 16 31 2 1 1
 2 16 31 3 1 1
 2 16 31 4 1 1
 2 16 32 1 1 1
 2 16 32 2 1 1
 2 16 32 3 2 1
 2 16 32 4 1 1
 2 17 1 1 2 1
 2 17 1 2 1 1
 2 17 1 3 1 1
 2 17 1 4 2 1
 2 17 2 1 2 1
 2 17 2 2 1 1
 2 17 2 3 1 1
 2 17 2 4 1 1
 2 17 3 1 2 1
 2 17 3 2 1 1
 2 17 3 3 1 1
 2 17 3 4 2 1
 2 17 4 1 2 1
 2 17 4 2 1 1
 2 17 4 3 1 1
 2 17 4 4 2 1
 2 17 5 1 1 1
 2 17 5 2 2 1
 2 17 5 3 1 1
 2 17 5 4 1 1
 2 17 6 1 1 1
 2 17 6 2 2 1
 2 17 6 3 2 1
 2 17 6 4 2 1
 2 17 7 1 2 1
 2 17 7 2 1 1
 2 17 7 3 1 1
 2 17 7 4 2 1
 2 17 8 1 1 1
 2 17 8 2 1 1
 2 17 8 3 1 1
 2 17 8 4 2 1
 2 17 9 1 1 1
 2 17 9 2 1 1
 2 17 9 3 1 1
 2 17 9 4 1 1
 2 17 10 1 1 1
 2 17 10 2 1 1
 2 17 10 3 2 1
 2 17 10 4 1 1
 2 17 11 1 1 1
 2 17 11 2 1 1
 2 17 11 3 2 1
 2 17 11 4 2 1
 2 17 12 1 2 1
 2 17 12 2 1 1
 2 17 12 3 1 1
 2 17 12 4 1 1
 2 17 13 1 2 1
 2 17 13 2 2 1
 2 17 13 3 2 1
 2 17 13 4 2 1
 2 17 14 1 1 1
 2 17 14 2 1 1
 2 17 14 3 1 1
 2 17 14 4 1 1
 2 17 15 1 2 1
 2 17 15 2 1 1
 2 17 15 3 2 1
 2 17 15 4 1 1
 2 17 16 1 1 1
 2 17 16 2 2 1
 2 17 16 3 1 1
 2 17 16 4 2 1
 2 17 17 1 1 1
 2 17 17 2 1 1
 2 17 17 3 2 1
 2 17 17 4 2 1
 2 17 18 1 2 1
 2 17 18 2 2 1
 2 17 18 3 1 1
 2 17 18 4 1 1
 2 17 19 1 1 1
 2 17 19 2 1 1
 2 17 19 3 2 1
 2 17 19 4 1 1
 2 17 20 1 2 1
 2 17 20 2 1 1
 2 17 20 3 1 1
 2 17 20 4 1 1
 2 17 21 1 1 1
 2 17 21 2 1 1
 2 17 21 3 1 1
 2 17 21 4 1 1
 2 17 22 1 2 1
 2 17 22 2 1 1
 2 17 22 3 1 1
 2 17 22 4 1 1
 2 17 23 1 1 1
 2 17 23 2 2 1
 2 17 23 3 1 1
 2 17 23 4 2 1
 2 17 24 1 2 1
 2 17 24 2 2 1
 2 17 24 3 1 1
 2 17 24 4 1 1
 2 17 25 1 2 1
 2 17 25 2 2 1
 2 17 25 3 2 1
 2 17 25 4 2 1
 2 17 26 1 1 1
 2 17 26 2 2 1
 2 17 26 3 1 1
 2 17 26 4 1 1
 2 17 27 1 1 1
 2 17 27 2 1 1
 2 17 27 3 2 1
 2 17 27 4 1 1
 2 17 28 1 2 1
 2 17 28 2 1 1
 2 17 28 3 1 1
 2 17 28 4 1 1
 2 17 29 1 1 1
 2 17 29 2 1 1
 2 17 29 3 1 1
 2 17 29 4 1 1
 2 17 30 1 1 1
 2 17 30 2 1 1
 2 17 30 3 2 1
 2 17 30 4 1 1
 2 17 31 1 1 1
 2 17 31 2 1 1
 2 17 31 3 1 1
 2 17 31 4 2 1
 2 17 32 1 1 1
 2 17 32 2 1 1
 2 17 32 3 1 1
 2 17 32 4 2 1
 2 18 1 1 1 1
 2 18 1 2 2 1
 2 18 1 3 1 1
 2 18 1 4 2 1
 2 18 2 1 1 1
 2 18 2 2 1 1
 2 18 2 3 1 1
 2 18 2 4 1 1
 2 18 3 1 2 1
 2 18 3 2 1 1
 2 18 3 3 2 1
 2 18 3 4 1 1
 2 18 4 1 2 1
 2 18 4 2 1 1
 2 18 4 3 1 1
 2 18 4 4 2 1
 2 18 5 1 1 1
 2 18 5 2 1 1
 2 18 5 3 2 1
 2 18 5 4 1 1
 2 18 6 1 1 1
 2 18 6 2 1 1
 2 18 6 3 2 1
 2 18 6 4 1 1
 2 18 7 1 2 1
 2 18 7 2 1 1
 2 18 7 3 1 1
 2 18 7 4 1 1
 2 18 8 1 1 1
 2 18 8 2 2 1
 2 18 8 3 1 1
 2 18 8 4 1 1
 2 18 9 1 2 1
 2 18 9 2 2 1
 2 18 9 3 1 1
 2 18 9 4 1 1
 2 18 10 1 1 1
 2 18 10 2 1 1
 2 18 10 3 2 1
 2 18 10 4 1 1
 2 18 11 1 2 1
 2 18 11 2 1 1
 2 18 11 3 2 1
 2 18 11 4 2 1
 2 18 12 1 2 1
 2 18 12 2 1 1
 2 18 12 3 1 1
 2 18 12 4 1 1
 2 18 13 1 1 1
 2 18 13 2 1 1
 2 18 13 3 1 1
 2 18 13 4 1 1
 2 18 14 1 1 1
 2 18 14 2 2 1
 2 18 14 3 1 1
 2 18 14 4 2 1
 2 18 15 1 1 1
 2 18 15 2 2 1
 2 18 15 3 1 1
 2 18 15 4 1 1
 2 18 16 1 1 1
 2 18 16 2 1 1
 2 18 16 3 1 1
 2 18 16 4 2 1
 2 18 17 1 2 1
 2 18 17 2 2 1
 2 18 17 3 1 1
 2 18 17 4 1 1
 2 18 18 1 1 1
 2 18 18 2 1 1
 2 18 18 3 1 1
 2 18 18 4 2 1
 2 18 19 1 1 1
 2 18 19 2 2 1
 2 18 19 3 1 1
 2 18 19 4 1 1
 2 18 20 1 1 1
 2 18 20 2 1 1
 2 18 20 3 1 1
 2 18 20 4 1 1
 2 18 21 1 1 1
 2 18 21 2 2 1
 2 18 21 3 1 1
 2 18 21 4 1 1
 2 18 22 1 2 1
 2 18 22 2 1 1
 2 18 22 3 1 1
 2 18 22 4 1 1
 2 18 23 1 1 1
 2 18 23 2 1 1
 2 18 23 3 1 1
 2 18 23 4 1 1
 2 18 24 1 1 1
 2 18 24 2 1 1
 2 18 24 3 2 1
 2 18 24 4 1 1
 2 18 25 1 1 1
 2 18 25 2 1 1
 2 18 25 3 2 1
 2 18 25 4 1 1
 2 18 26 1 1 1
 2 18 26 2 1 1
 2 18 26 3 1 1
 2 18 26 4 2 1
 2 18 27 1 1 1
 2 18 27 2 2 1
 2 18 27 3 1 1
 2 18 27 4 1 1
 2 18 28 1 1 1
 2 18 28 2 1 1
 2 18 28 3 1 1
 2 18 28 4 1 1
 2 18 29 1 2 1
 2 18 29 2 1 1
 2 18 29 3 1 1
 2 18 29 4 1 1
 2 18 30 1 1 1
 2 18 30 2 2 1
 2 18 30 3 1 1
 2 18 30 4 1 1
 2 18 31 1 2 1
 2 18 31 2 1 1
 2 18 31 3 1 1
 2 18 31 4 2 1
 2 18 32 1 1 1
 2 18 32 2 1 1
 2 18 32 3 2 1
 2 18 32 4 1 1
 2 19 1 1 1 1
 2 19 1 2 1 1
 2 19 1 3 1 1
 2 19 1 4 1 1
 2 19 2 1 1 1
 2 19 2 2 1 1
 2 19 2 3 2 1
 2 19 2 4 1 1
 2 19 3 1 1 1
 2 19 3 2 2 1
 2 19 3 3 1 1
 2 19 3 4 1 1
 2 19 4 1 1 1
 2 19 4 2 1 1
 2 19 4 3 1 1
 2 19 4 4 1 1
 2 19 5 1 1 1
 2 19 5 2 2 1
 2 19 5 3 1 1
 2 19 5 4 2 1
 2 19 6 1 2 1
 2 19 6 2 1 1
 2 19 6 3 1 1
 2 19 6 4 2 1
 2 19 7 1 1 1
 2 19 7 2 1 1
 2 19 7 3 1 1
 2 19 7 4 1 1
 2 19 8 1 2 1
 2 19 8 2 2 1
 2 19 8 3 1 1
 2 19 8 4 1 1
 2 19 9 1 1 1
 2 19 9 2 2 1
 2 19 9 3 1 1
 2 19 9 4 1 1
 2 19 10 1 2 1
 2 19 10 2 1 1
 2 19 10 3 2 1
 2 19 10 4 1 1
 2 19 11 1 2 1
 2 19 11 2 2 1
 2 19 11 3 1 1
 2 19 11 4 1 1
 2 19 12 1 1 1
 2 19 12 2 2 1
 2 19 12 3 1 1
 2 19 12 4 1 1
 2 19 13 1 1 1
 2 19 13 2 1 1
 2 19 13 3 1 1
 2 19 13 4 2 1
 2 19 14 1 1 1
 2 19 14 2 2 1
 2 19 14 3 1 1
 2 19 14 4 1 1
 2 19 15 1 2 1
 2 19 15 2 1 1
 2 19 15 3 2 1
 2 19 15 4 1 1
 2 19 16 1 2 1
 2 19 16 2 2 1
 2 19 16 3 1 1
 2 19 16 4 1 1
 2 19 17 1 1 1
 2 19 17 2 1 1
 2 19 17 3 2 1
 2 19 17 4 1 1
 2 19 18 1 2 1
 2 19 18 2 2 1
 2 19 18 3 1 1
 2 19 18 4 1 1
 2 19 19 1 1 1
 2 19 19 2 2 1
 2 19 19 3 1 1
 2 19 19 4 1 1
 2 19 20 1 1 1
 2 19 20 2 1 1
 2 19 20 3 1 1
 2 19 20 4 1 1
 2 19 21 1 2 1
 2 19 21 2 1 1
 2 19 21 3 1 1
 2 19 21 4 1 1
 2 19 22 1 1 1
 2 19 22 2 1 1
 2 19 22 3 2 1
 2 19 22 4 1 1
 2 19 23 1 1 1
 2 19 23 2 1 1
 2 19 23 3 1 1
 2 19 23 4 1 1
 2 19 24 1 2 1
 2 19 24 2 1 1
 2 19 24 3 2 1
 2 19 24 4 1 1
 2 19 25 1 2 1
 2 19 25 2 2 1
 2 19 25 3 1 1
 2 19 25 4 1 1
 2 19 26 1 2 1
 2 19 26 2 1 1
 2 19 26 3 2 1
 2 19 26 4 1 1
 2 19 27 1 1 1
 2 19 27 2 1 1
 2 19 27 3 2 1
 2 19 27 4 2 1
 2 19 28 1 2 1
 2 19 28 2 1 1
 2 19 28 3 1 1
 2 19 28 4 1 1
 2 19 29 1 1 1
 2 19 29 2 1 1
 2 19 29 3 1 1
 2 19 29 4 1 1
 2 19 30 1 1 1
 2 19 30 2 1 1
 2 19 30 3 1 1
 2 19 30 4 1 1
 2 19 31 1 2 1
 2 19 31 2 1 1
 2 19 31 3 1 1
 2 19 31 4 1 1
 2 19 32 1 2 1
 2 19 32 2 1 1
 2 19 32 3 1 1
 2 19 32 4 2 1
 2 20 1 1 2 1
 2 20 1 2 1 1
 2 20 1 3 2 1
 2 20 1 4 1 1
 2 20 2 1 2 1
 2 20 2 2 2 1
 2 20 2 3 2 1
 2 20 2 4 1 1
 2 20 3 1 1 1
 2 20 3 2 1 1
 2 20 3 3 1 1
 2 20 3 4 1 1
 2 20 4 1 2 1
 2 20 4 2 2 1
 2 20 4 3 1 1
 2 20 4 4 1 1
 2 20 5 1 1 1
 2 20 5 2 1 1
 2 20 5 3 2 1
 2 20 5 4 1 1
 2 20 6 1 1 1
 2 20 6 2 1 1
 2 20 6 3 1 1
 2 20 6 4 1 1
 2 20 7 1 2 1
 2 20 7 2 1 1
 2 20 7 3 1 1
 2 20 7 4 1 1
 2 20 8 1 2 1
 2 20 8 2 1 1
 2 20 8 3 2 1
 2 20 8 4 2 1
 2 20 9 1 1 1
 2 20 9 2 2 1
 2 20 9 3 1 1
 2 20 9 4 2 1
 2 20 10 1 1 1
 2 20 10 2 1 1
 2 20 10 3 1 1
 2 20 10 4 1 1
 2 20 11 1 1 1
 2 20 11 2 1 1
 2 20 11 3 1 1
 2 20 11 4 1 1
 2 20 12 1 1 1
 2 20 12 2 2 1
 2 20 12 3 1 1
 2 20 12 4 1 1
 2 20 13 1 1 1
 2 20 13 2 2 1
 2 20 13 3 1 1
 2 20 13 4 2 1
 2 20 14 1 1 1
 2 20 14 2 2 1
 2 20 14 3 1 1
 2 20 14 4 1 1
 2 20 15 1 1 1
 2 20 15 2 1 1
 2 20 15 3 1 1
 2 20 15 4 1 1
 2 20 16 1 1 1
 2 20 16 2 2 1
 2 20 16 3 1 1
 2 20 16 4 1 1
 2 20 17 1 2 1
 2 20 17 2 2 1
 2 20 17 3 1 1
 2 20 17 4 1 1
 2 20 18 1 1 1
 2 20 18 2 2 1
 2 20 18 3 1 1
 2 20 18 4 1 1
 2 20 19 1 1 1
 2 20 19 2 1 1
 2 20 19 3 1 1
 2 20 19 4 1 1
 2 20 20 1 1 1
 2 20 20 2 1 1
 2 20 20 3 1 1
 2 20 20 4 2 1
 2 20 21 1 1 1
 2 20 21 2 2 1
 2 20 21 3 1 1
 2 20 21 4 1 1
 2 20 22 1 2 1
 2 20 22 2 1 1
 2 20 22 3 2 1
 2 20 22 4 1 1
 2 20 23 1 1 1
 2 20 23 2 1 1
 2 20 23 3 1 1
 2 20 23 4 1 1
 2 20 24 1 2 1
 2 20 24 2 2 1
 2 20 24 3 1 1
 2 20 24 4 2 1
 2 20 25 1 1 1
 2 20 25 2 1 1
 2 20 25 3 2 1
 2 20 25 4 2 1
 2 20 26 1 2 1
 2 20 26 2 1 1
 2 20 26 3 1 1
 2 20 26 4 1 1
 2 20 27 1 1 1
 2 20 27 2 2 1
 2 20 27 3 1 1
 2 20 27 4 1 1
 2 20 28 1 1 1
 2 20 28 2 1 1
 2 20 28 3 1 1
 2 20 28 4 2 1
 2 20 29 1 1 1
 2 20 29 2 1 1
 2 20 29 3 1 1
 2 20 29 4 1 1
 2 20 30 1 2 1
 2 20 30 2 1 1
 2 20 30 3 1 1
 2 20 30 4 2 1
 2 20 31 1 2 1
 2 20 31 2 2 1
 2 20 31 3 1 1
 2 20 31 4 1 1
 2 20 32 1 1 1
 2 20 32 2 1 1
 2 20 32 3 2 1
 2 20 32 4 1 1
 2 21 1 1 1 1
 2 21 1 2 1 1
 2 21 1 3 2 1
 2 21 1 4 1 1
 2 21 2 1 1 1
 2 21 2 2 1 1
 2 21 2 3 1 1
 2 21 2 4 1 1
 2 21 3 1 1 1
 2 21 3 2 1 1
 2 21 3 3 1 1
 2 21 3 4 1 1
 2 21 4 1 2 1
 2 21 4 2 1 1
 2 21 4 3 1 1
 2 21 4 4 1 1
 2 21 5 1 1 1
 2 21 5 2 1 1
 2 21 5 3 2 1
 2 21 5 4 1 1
 2 21 6 1 1 1
 2 21 6 2 2 1
 2 21 6 3 1 1
 2 21 6 4 1 1
 2 21 7 1 1 1
 2 21 7 2 1 1
 2 21 7 3 2 1
 2 21 7 4 1 1
 2 21 8 1 1 1
 2 21 8 2 2 1
 2 21 8 3 1 1
 2 21 8 4 2 1
 2 21 9 1 1 1
 2 21 9 2 2 1
 2 21 9 3 1 1
 2 21 9 4 1 1
 2 21 10 1 1 1
 2 21 10 2 1 1
 2 21 10 3 1 1
 2 21 10 4 1 1
 2 21 11 1 1 1
 2 21 11 2 1 1
 2 21 11 3 2 1
 2 21 11 4 1 1
 2 21 12 1 1 1
 2 21 12 2 1 1
 2 21 12 3 2 1
 2 21 12 4 2 1
 2 21 13 1 2 1
 2 21 13 2 2 1
 2 21 13 3 2 1
 2 21 13 4 2 1
 2 21 14 1 1 1
 2 21 14 2 1 1
 2 21 14 3 2 1
 2 21 14 4 1 1
 2 21 15 1 1 1
 2 21 15 2 2 1
 2 21 15 3 1 1
 2 21 15 4 2 1
 2 21 16 1 2 1
 2 21 16 2 1 1
 2 21 16 3 1 1
 2 21 16 4 2 1
 2 21 17 1 1 1
 2 21 17 2 1 1
 2 21 17 3 1 1
 2 21 17 4 1 1
 2 21 18 1 1 1
 2 21 18 2 1 1
 2 21 18 3 1 1
 2 21 18 4 1 1
 2 21 19 1 1 1
 2 21 19 2 2 1
 2 21 19 3 1 1
 2 21 19 4 1 1
 2 21 20 1 2 1
 2 21 20 2 1 1
 2 21 20 3 2 1
 2 21 20 4 1 1
 2 21 21 1 2 1
 2 21 21 2 2 1
 2 21 21 3 1 1
 2 21 21 4 1 1
 2 21 22 1 2 1
 2 21 22 2 1 1
 2 21 22 3 1 1
 2 21 22 4 2 1
 2 21 23 1 1 1
 2 21 23 2 1 1
 2 21 23 3 1 1
 2 21 23 4 2 1
 2 21 24 1 1 1
 2 21 24 2 1 1
 2 21 24 3 2 1
 2 21 24 4 2 1
 2 21 25 1 1 1
 2 21 25 2 1 1
 2 21 25 3 1 1
 2 21 25 4 1 1
 2 21 26 1 2 1
 2 21 26 2 2 1
 2 21 26 3 2 1
 2 21 26 4 2 1
 2 21 27 1 1 1
 2 21 27 2 1 1
 2 21 27 3 1 1
 2 21 27 4 1 1
 2 21 28 1 1 1
 2 21 28 2 1 1
 2 21 28 3 1 1
 2 21 28 4 1 1
 2 21 29 1 1 1
 2 21 29 2 1 1
 2 21 29 3 1 1
 2 21 29 4 1 1
 2 21 30 1 2 1
 2 21 30 2 2 1
 2 21 30 3 1 1
 2 21 30 4 1 1
 2 21 31 1 2 1
 2 21 31 2 2 1
 2 21 31 3 1 1
 2 21 31 4 1 1
 2 21 32 1 2 1
 2 21 32 2 1 1
 2 21 32 3 1 1
 2 21 32 4 2 1
 2 22 1 1 1 1
 2 22 1 2 1 1
 2 22 1 3 1 1
 2 22 1 4 1 1
 2 22 2 1 1 1
 2 22 2 2 2 1
 2 22 2 3 2 1
 2 22 2 4 2 1
 2 22 3 1 1 1
 2 22 3 2 2 1
 2 22 3 3 1 1
 2 22 3 4 2 1
 2 22 4 1 1 1
 2 22 4 2 1 1
 2 22 4 3 1 1
 2 22 4 4 1 1
 2 22 5 1 1 1
 2 22 5 2 2 1
 2 22 5 3 1 1
 2 22 5 4 2 1
 2 22 6 1 1 1
 2 22 6 2 1 1
 2 22 6 3 1 1
 2 22 6 4 1 1
 2 22 7 1 2 1
 2 22 7 2 2 1
 2 22 7 3 1 1
 2 22 7 4 1 1
 2 22 8 1 1 1
 2 22 8 2 1 1
 2 22 8 3 1 1
 2 22 8 4 1 1
 2 22 9 1 1 1
 2 22 9 2 1 1
 2 22 9 3 1 1
 2 22 9 4 1 1
 2 22 10 1 1 1
 2 22 10 2 1 1
 2 22 10 3 1 1
 2 22 10 4 1 1
 2 22 11 1 2 1
 2 22 11 2 2 1
 2 22 11 3 1 1
 2 22 11 4 1 1
 2 22 12 1 1 1
 2 22 12 2 1 1
 2 22 12 3 1 1
 2 22 12 4 1 1
 2 22 13 1 1 1
 2 22 13 2 1 1
 2 22 13 3 1 1
 2 22 13 4 1 1
 2 22 14 1 1 1
 2 22 14 2 1 1
 2 22 14 3 1 1
 2 22 14 4 1 1
 2 22 15 1 1 1
 2 22 15 2 1 1
 2 22 15 3 1 1
 2 22 15 4 1 1
 2 22 16 1 1 1
 2 22 16 2 1 1
 2 22 16 3 1 1
 2 22 16 4 2 1
 2 22 17 1 1 1
 2 22 17 2 1 1
 2 22 17 3 2 1
 2 22 17 4 2 1
 2 22 18 1 1 1
 2 22 18 2 2 1
 2 22 18 3 1 1
 2 22 18 4 1 1
 2 22 19 1 1 1
 2 22 19 2 1 1
 2 22 19 3 1 1
 2 22 19 4 2 1
 2 22 20 1 1 1
 2 22 20 2 1 1
 2 22 20 3 2 1
 2 22 20 4 2 1
 2 22 21 1 1 1
 2 22 21 2 2 1
 2 22 21 3 2 1
 2 22 21 4 2 1
 2 22 22 1 1 1
 2 22 22 2 2 1
 2 22 22 3 1 1
 2 22 22 4 1 1
 2 22 23 1 2 1
 2 22 23 2 2 1
 2 22 23 3 1 1
 2 22 23 4 2 1
 2 22 24 1 1 1
 2 22 24 2 1 1
 2 22 24 3 1 1
 2 22 24 4 1 1
 2 22 25 1 1 1
 2 22 25 2 1 1
 2 22 25 3 1 1
 2 22 25 4 1 1
 2 22 26 1 1 1
 2 22 26 2 1 1
 2 22 26 3 1 1
 2 22 26 4 1 1
 2 22 27 1 1 1
 2 22 27 2 1 1
 2 22 27 3 1 1
 2 22 27 4 1 1
 2 22 28 1 1 1
 2 22 28 2 1 1
 2 22 28 3 1 1
 2 22 28 4 2 1
 2 22 29 1 1 1
 2 22 29 2 1 1
 2 22 29 3 2 1
 2 22 29 4 1 1
 2 22 30 1 1 1
 2 22 30 2 1 1
 2 22 30 3 2 1
 2 22 30 4 2 1
 2 22 31 1 1 1
 2 22 31 2 2 1
 2 22 31 3 1 1
 2 22 31 4 2 1
 2 22 32 1 2 1
 2 22 32 2 2 1
 2 22 32 3 1 1
 2 22 32 4 2 1
 2 23 1 1 1 1
 2 23 1 2 1 1
 2 23 1 3 1 1
 2 23 1 4 1 1
 2 23 2 1 1 1
 2 23 2 2 1 1
 2 23 2 3 1 1
 2 23 2 4 2 1
 2 23 3 1 1 1
 2 23 3 2 1 1
 2 23 3 3 2 1
 2 23 3 4 1 1
 2 23 4 1 1 1
 2 23 4 2 1 1
 2 23 4 3 1 1
 2 23 4 4 2 1
 2 23 5 1 1 1
 2 23 5 2 2 1
 2 23 5 3 1 1
 2 23 5 4 1 1
 2 23 6 1 2 1
 2 23 6 2 1 1
 2 23 6 3 2 1
 2 23 6 4 1 1
 2 23 7 1 1 1
 2 23 7 2 1 1
 2 23 7 3 1 1
 2 23 7 4 1 1
 2 23 8 1 1 1
 2 23 8 2 2 1
 2 23 8 3 1 1
 2 23 8 4 2 1
 2 23 9 1 2 1
 2 23 9 2 1 1
 2 23 9 3 2 1
 2 23 9 4 1 1
 2 23 10 1 1 1
 2 23 10 2 2 1
 2 23 10 3 2 1
 2 23 10 4 2 1
 2 23 11 1 2 1
 2 23 11 2 1 1
 2 23 11 3 1 1
 2 23 11 4 1 1
 2 23 12 1 2 1
 2 23 12 2 1 1
 2 23 12 3 1 1
 2 23 12 4 2 1
 2 23 13 1 2 1
 2 23 13 2 1 1
 2 23 13 3 2 1
 2 23 13 4 2 1
 2 23 14 1 2 1
 2 23 14 2 1 1
 2 23 14 3 1 1
 2 23 14 4 2 1
 2 23 15 1 2 1
 2 23 15 2 1 1
 2 23 15 3 1 1
 2 23 15 4 1 1
 2 23 16 1 2 1
 2 23 16 2 1 1
 2 23 16 3 1 1
 2 23 16 4 2 1
 2 23 17 1 2 1
 2 23 17 2 1 1
 2 23 17 3 1 1
 2 23 17 4 1 1
 2 23 18 1 1 1
 2 23 18 2 1 1
 2 23 18 3 1 1
 2 23 18 4 2 1
 2 23 19 1 1 1
 2 23 19 2 1 1
 2 23 19 3 1 1
 2 23 19 4 1 1
 2 23 20 1 1 1
 2 23 20 2 1 1
 2 23 20 3 2 1
 2 23 20 4 2 1
 2 23 21 1 1 1
 2 23 21 2 1 1
 2 23 21 3 1 1
 2 23 21 4 2 1
 2 23 22 1 1 1
 2 23 22 2 1 1
 2 23 22 3 2 1
 2 23 22 4 1 1
 2 23 23 1 1 1
 2 23 23 2 1 1
 2 23 23 3 1 1
 2 23 23 4 2 1
 2 23 24 1 1 1
 2 23 24 2 1 1
 2 23 24 3 1 1
 2 23 24 4 2 1
 2 23 25 1 2 1
 2 23 25 2 1 1
 2 23 25 3 2 1
 2 23 25 4 1 1
 2 23 26 1 1 1
 2 23 26 2 1 1
 2 23 26 3 1 1
 2 23 26 4 2 1
 2 23 27 1 2 1
 2 23 27 2 1 1
 2 23 27 3 1 1
 2 23 27 4 1 1
 2 23 28 1 1 1
 2 23 28 2 1 1
 2 23 28 3 2 1
 2 23 28 4 1 1
 2 23 29 1 1 1
 2 23 29 2 1 1
 2 23 29 3 1 1
 2 23 29 4 1 1
 2 23 30 1 2 1
 2 23 30 2 1 1
 2 23 30 3 1 1
 2 23 30 4 1 1
 2 23 31 1 2 1
 2 23 31 2 1 1
 2 23 31 3 1 1
 2 23 31 4 2 1
 2 23 32 1 1 1
 2 23 32 2 1 1
 2 23 32 3 2 1
 2 23 32 4 1 1
 2 24 1 1 1 1
 2 24 1 2 2 1
 2 24 1 3 1 1
 2 24 1 4 2 1
 2 24 2 1 1 1
 2 24 2 2 1 1
 2 24 2 3 1 1
 2 24 2 4 1 1
 2 24 3 1 1 1
 2 24 3 2 2 1
 2 24 3 3 1 1
 2 24 3 4 1 1
 2 24 4 1 1 1
 2 24 4 2 2 1
 2 24 4 3 1 1
 2 24 4 4 1 1
 2 24 5 1 1 1
 2 24 5 2 1 1
 2 24 5 3 1 1
 2 24 5 4 1 1
 2 24 6 1 2 1
 2 24 6 2 1 1
 2 24 6 3 2 1
 2 24 6 4 1 1
 2 24 7 1 2 1
 2 24 7 2 2 1
 2 24 7 3 1 1
 2 24 7 4 1 1
 2 24 8 1 1 1
 2 24 8 2 1 1
 2 24 8 3 1 1
 2 24 8 4 1 1
 2 24 9 1 1 1
 2 24 9 2 1 1
 2 24 9 3 1 1
 2 24 9 4 1 1
 2 24 10 1 1 1
 2 24 10 2 1 1
 2 24 10 3 1 1
 2 24 10 4 2 1
 2 24 11 1 1 1
 2 24 11 2 1 1
 2 24 11 3 1 1
 2 24 11 4 1 1
 2 24 12 1 2 1
 2 24 12 2 2 1
 2 24 12 3 1 1
 2 24 12 4 1 1
 2 24 13 1 1 1
 2 24 13 2 1 1
 2 24 13 3 2 1
 2 24 13 4 1 1
 2 24 14 1 1 1
 2 24 14 2 2 1
 2 24 14 3 1 1
 2 24 14 4 1 1
 2 24 15 1 2 1
 2 24 15 2 2 1
 2 24 15 3 1 1
 2 24 15 4 2 1
 2 24 16 1 2 1
 2 24 16 2 1 1
 2 24 16 3 1 1
 2 24 16 4 1 1
 2 24 17 1 1 1
 2 24 17 2 1 1
 2 24 17 3 1 1
 2 24 17 4 1 1
 2 24 18 1 1 1
 2 24 18 2 1 1
 2 24 18 3 1 1
 2 24 18 4 1 1
 2 24 19 1 1 1
 2 24 19 2 1 1
 2 24 19 3 1 1
 2 24 19 4 1 1
 2 24 20 1 1 1
 2 24 20 2 1 1
 2 24 20 3 1 1
 2 24 20 4 1 1
 2 24 21 1 1 1
 2 24 21 2 1 1
 2 24 21 3 1 1
 2 24 21 4 1 1
 2 24 22 1 1 1
 2 24 22 2 1 1
 2 24 22 3 1 1
 2 24 22 4 1 1
 2 24 23 1 1 1
 2 24 23 2 1 1
 2 24 23 3 1 1
 2 24 23 4 2 1
 2 24 24 1 1 1
 2 24 24 2 1 1
 2 24 24 3 1 1
 2 24 24 4 1 1
 2 24 25 1 1 1
 2 24 25 2 2 1
 2 24 25 3 2 1
 2 24 25 4 2 1
 2 24 26 1 1 1
 2 24 26 2 1 1
 2 24 26 3 2 1
 2 24 26 4 1 1
 2 24 27 1 2 1
 2 24 27 2 1 1
 2 24 27 3 1 1
 2 24 27 4 2 1
 2 24 28 1 2 1
 2 24 28 2 1 1
 2 24 28 3 1 1
 2 24 28 4 1 1
 2 24 29 1 1 1
 2 24 29 2 2 1
 2 24 29 3 1 1
 2 24 29 4 1 1
 2 24 30 1 1 1
 2 24 30 2 1 1
 2 24 30 3 1 1
 2 24 30 4 1 1
 2 24 31 1 1 1
 2 24 31 2 1 1
 2 24 31 3 1 1
 2 24 31 4 1 1
 2 24 32 1 1 1
 2 24 32 2 1 1
 2 24 32 3 2 1
 2 24 32 4 2 1
 2 25 1 1 1 1
 2 25 1 2 2 1
 2 25 1 3 2 1
 2 25 1 4 1 1
 2 25 2 1 1 1
 2 25 2 2 1 1
 2 25 2 3 1 1
 2 25 2 4 2 1
 2 25 3 1 1 1
 2 25 3 2 1 1
 2 25 3 3 1 1
 2 25 3 4 2 1
 2 25 4 1 1 1
 2 25 4 2 1 1
 2 25 4 3 1 1
 2 25 4 4 1 1
 2 25 5 1 1 1
 2 25 5 2 1 1
 2 25 5 3 2 1
 2 25 5 4 1 1
 2 25 6 1 2 1
 2 25 6 2 1 1
 2 25 6 3 1 1
 2 25 6 4 2 1
 2 25 7 1 1 1
 2 25 7 2 1 1
 2 25 7 3 1 1
 2 25 7 4 2 1
 2 25 8 1 1 1
 2 25 8 2 1 1
 2 25 8 3 1 1
 2 25 8 4 1 1
 2 25 9 1 2 1
 2 25 9 2 1 1
 2 25 9 3 1 1
 2 25 9 4 1 1
 2 25 10 1 2 1
 2 25 10 2 2 1
 2 25 10 3 1 1
 2 25 10 4 1 1
 2 25 11 1 2 1
 2 25 11 2 2 1
 2 25 11 3 1 1
 2 25 11 4 1 1
 2 25 12 1 1 1
 2 25 12 2 1 1
 2 25 12 3 1 1
 2 25 12 4 1 1
 2 25 13 1 1 1
 2 25 13 2 1 1
 2 25 13 3 1 1
 2 25 13 4 2 1
 2 25 14 1 1 1
 2 25 14 2 1 1
 2 25 14 3 1 1
 2 25 14 4 2 1
 2 25 15 1 2 1
 2 25 15 2 1 1
 2 25 15 3 2 1
 2 25 15 4 1 1
 2 25 16 1 1 1
 2 25 16 2 1 1
 2 25 16 3 1 1
 2 25 16 4 1 1
 2 25 17 1 1 1
 2 25 17 2 1 1
 2 25 17 3 1 1
 2 25 17 4 1 1
 2 25 18 1 2 1
 2 25 18 2 1 1
 2 25 18 3 1 1
 2 25 18 4 1 1
 2 25 19 1 1 1
 2 25 19 2 1 1
 2 25 19 3 2 1
 2 25 19 4 2 1
 2 25 20 1 1 1
 2 25 20 2 2 1
 2 25 20 3 1 1
 2 25 20 4 1 1
 2 25 21 1 1 1
 2 25 21 2 1 1
 2 25 21 3 2 1
 2 25 21 4 2 1
 2 25 22 1 1 1
 2 25 22 2 1 1
 2 25 22 3 1 1
 2 25 22 4 1 1
 2 25 23 1 2 1
 2 25 23 2 1 1
 2 25 23 3 1 1
 2 25 23 4 1 1
 2 25 24 1 2 1
 2 25 24 2 1 1
 2 25 24 3 1 1
 2 25 24 4 1 1
 2 25 25 1 1 1
 2 25 25 2 2 1
 2 25 25 3 1 1
 2 25 25 4 2 1
 2 25 26 1 1 1
 2 25 26 2 1 1
 2 25 26 3 1 1
 2 25 26 4 2 1
 2 25 27 1 2 1
 2 25 27 2 1 1
 2 25 27 3 1 1
 2 25 27 4 2 1
 2 25 28 1 1 1
 2 25 28 2 2 1
 2 25 28 3 2 1
 2 25 28 4 1 1
 2 25 29 1 1 1
 2 25 29 2 1 1
 2 25 29 3 2 1
 2 25 29 4 1 1
 2 25 30 1 1 1
 2 25 30 2 1 1
 2 25 30 3 2 1
 2 25 30 4 2 1
 2 25 31 1 1 1
 2 25 31 2 1 1
 2 25 31 3 2 1
 2 25 31 4 1 1
 2 25 32 1 1 1
 2 25 32 2 1 1
 2 25 32 3 1 1
 2 25 32 4 1 1
 2 26 1 1 1 1
 2 26 1 2 1 1
 2 26 1 3 2 1
 2 26 1 4 1 1
 2 26 2 1 1 1
 2 26 2 2 2 1
 2 26 2 3 1 1
 2 26 2 4 1 1
 2 26 3 1 1 1
 2 26 3 2 1 1
 2 26 3 3 1 1
 2 26 3 4 1 1
 2 26 4 1 1 1
 2 26 4 2 1 1
 2 26 4 3 1 1
 2 26 4 4 2 1
 2 26 5 1 2 1
 2 26 5 2 1 1
 2 26 5 3 1 1
 2 26 5 4 1 1
 2 26 6 1 1 1
 2 26 6 2 1 1
 2 26 6 3 1 1
 2 26 6 4 1 1
 2 26 7 1 1 1
 2 26 7 2 1 1
 2 26 7 3 2 1
 2 26 7 4 1 1
 2 26 8 1 1 1
 2 26 8 2 1 1
 2 26 8 3 1 1
 2 26 8 4 1 1
 2 26 9 1 1 1
 2 26 9 2 2 1
 2 26 9 3 1 1
 2 26 9 4 1 1
 2 26 10 1 1 1
 2 26 10 2 1 1
 2 26 10 3 2 1
 2 26 10 4 1 1
 2 26 11 1 1 1
 2 26 11 2 2 1
 2 26 11 3 1 1
 2 26 11 4 1 1
 2 26 12 1 1 1
 2 26 12 2 1 1
 2 26 12 3 1 1
 2 26 12 4 2 1
 2 26 13 1 2 1
 2 26 13 2 2 1
 2 26 13 3 1 1
 2 26 13 4 1 1
 2 26 14 1 2 1
 2 26 14 2 1 1
 2 26 14 3 1 1
 2 26 14 4 2 1
 2 26 15 1 1 1
 2 26 15 2 2 1
 2 26 15 3 1 1
 2 26 15 4 1 1
 2 26 16 1 2 1
 2 26 16 2 2 1
 2 26 16 3 1 1
 2 26 16 4 1 1
 2 26 17 1 1 1
 2 26 17 2 1 1
 2 26 17 3 1 1
 2 26 17 4 1 1
 2 26 18 1 1 1
 2 26 18 2 1 1
 2 26 18 3 1 1
 2 26 18 4 1 1
 2 26 19 1 2 1
 2 26 19 2 1 1
 2 26 19 3 2 1
 2 26 19 4 1 1
 2 26 20 1 1 1
 2 26 20 2 1 1
 2 26 20 3 2 1
 2 26 20 4 1 1
 2 26 21 1 1 1
 2 26 21 2 1 1
 2 26 21 3 1 1
 2 26 21 4 1 1
 2 26 22 1 2 1
 2 26 22 2 1 1
 2 26 22 3 2 1
 2 26 22 4 1 1
 2 26 23 1 1 1
 2 26 23 2 2 1
 2 26 23 3 1 1
 2 26 23 4 1 1
 2 26 24 1 2 1
 2 26 24 2 1 1
 2 26 24 3 1 1
 2 26 24 4 1 1
 2 26 25 1 1 1
 2 26 25 2 1 1
 2 26 25 3 1 1
 2 26 25 4 1 1
 2 26 26 1 1 1
 2 26 26 2 1 1
 2 26 26 3 1 1
 2 26 26 4 1 1
 2 26 27 1 2 1
 2 26 27 2 1 1
 2 26 27 3 2 1
 2 26 27 4 1 1
 2 26 28 1 1 1
 2 26 28 2 2 1
 2 26 28 3 1 1
 2 26 28 4 1 1
 2 26 29 1 1 1
 2 26 29 2 1 1
 2 26 29 3 1 1
 2 26 29 4 1 1
 2 26 30 1 1 1
 2 26 30 2 2 1
 2 26 30 3 2 1
 2 26 30 4 1 1
 2 26 31 1 1 1
 2 26 31 2 1 1
 2 26 31 3 1 1
 2 26 31 4 2 1
 2 26 32 1 2 1
 2 26 32 2 1 1
 2 26 32 3 1 1
 2 26 32 4 2 1
 2 27 1 1 2 1
 2 27 1 2 1 1
 2 27 1 3 2 1
 2 27 1 4 1 1
 2 27 2 1 2 1
 2 27 2 2 1 1
 2 27 2 3 2 1
 2 27 2 4 1 1
 2 27 3 1 2 1
 2 27 3 2 1 1
 2 27 3 3 2 1
 2 27 3 4 1 1
 2 27 4 1 1 1
 2 27 4 2 1 1
 2 27 4 3 1 1
 2 27 4 4 1 1
 2 27 5 1 2 1
 2 27 5 2 1 1
 2 27 5 3 1 1
 2 27 5 4 1 1
 2 27 6 1 1 1
 2 27 6 2 2 1
 2 27 6 3 2 1
 2 27 6 4 2 1
 2 27 7 1 1 1
 2 27 7 2 1 1
 2 27 7 3 2 1
 2 27 7 4 2 1
 2 27 8 1 1 1
 2 27 8 2 2 1
 2 27 8 3 1 1
 2 27 8 4 1 1
 2 27 9 1 1 1
 2 27 9 2 1 1
 2 27 9 3 2 1
 2 27 9 4 1 1
 2 27 10 1 1 1
 2 27 10 2 1 1
 2 27 10 3 1 1
 2 27 10 4 2 1
 2 27 11 1 1 1
 2 27 11 2 1 1
 2 27 11 3 2 1
 2 27 11 4 1 1
 2 27 12 1 1 1
 2 27 12 2 1 1
 2 27 12 3 2 1
 2 27 12 4 1 1
 2 27 13 1 1 1
 2 27 13 2 1 1
 2 27 13 3 2 1
 2 27 13 4 2 1
 2 27 14 1 1 1
 2 27 14 2 1 1
 2 27 14 3 1 1
 2 27 14 4 2 1
 2 27 15 1 2 1
 2 27 15 2 1 1
 2 27 15 3 1 1
 2 27 15 4 2 1
 2 27 16 1 2 1
 2 27 16 2 1 1
 2 27 16 3 2 1
 2 27 16 4 1 1
 2 27 17 1 1 1
 2 27 17 2 2 1
 2 27 17 3 1 1
 2 27 17 4 1 1
 2 27 18 1 2 1
 2 27 18 2 1 1
 2 27 18 3 1 1
 2 27 18 4 1 1
 2 27 19 1 1 1
 2 27 19 2 2 1
 2 27 19 3 1 1
 2 27 19 4 2 1
 2 27 20 1 2 1
 2 27 20 2 2 1
 2 27 20 3 1 1
 2 27 20 4 1 1
 2 27 21 1 2 1
 2 27 21 2 1 1
 2 27 21 3 2 1
 2 27 21 4 1 1
 2 27 22 1 1 1
 2 27 22 2 1 1
 2 27 22 3 1 1
 2 27 22 4 2 1
 2 27 23 1 1 1
 2 27 23 2 1 1
 2 27 23 3 2 1
 2 27 23 4 2 1
 2 27 24 1 2 1
 2 27 24 2 1 1
 2 27 24 3 2 1
 2 27 24 4 1 1
 2 27 25 1 2 1
 2 27 25 2 1 1
 2 27 25 3 1 1
 2 27 25 4 1 1
 2 27 26 1 1 1
 2 27 26 2 2 1
 2 27 26 3 1 1
 2 27 26 4 2 1
 2 27 27 1 2 1
 2 27 27 2 2 1
 2 27 27 3 1 1
 2 27 27 4 1 1
 2 27 28 1 1 1
 2 27 28 2 2 1
 2 27 28 3 1 1
 2 27 28 4 1 1
 2 27 29 1 1 1
 2 27 29 2 1 1
 2 27 29 3 1 1
 2 27 29 4 1 1
 2 27 30 1 2 1
 2 27 30 2 2 1
 2 27 30 3 2 1
 2 27 30 4 1 1
 2 27 31 1 1 1
 2 27 31 2 1 1
 2 27 31 3 1 1
 2 27 31 4 2 1
 2 27 32 1 1 1
 2 27 32 2 1 1
 2 27 32 3 2 1
 2 27 32 4 1 1
 2 28 1 1 2 1
 2 28 1 2 1 1
 2 28 1 3 2 1
 2 28 1 4 1 1
 2 28 2 1 1 1
 2 28 2 2 1 1
 2 28 2 3 1 1
 2 28 2 4 1 1
 2 28 3 1 1 1
 2 28 3 2 1 1
 2 28 3 3 1 1
 2 28 3 4 1 1
 2 28 4 1 1 1
 2 28 4 2 2 1
 2 28 4 3 1 1
 2 28 4 4 1 1
 2 28 5 1 1 1
 2 28 5 2 1 1
 2 28 5 3 2 1
 2 28 5 4 2 1
 2 28 6 1 1 1
 2 28 6 2 1 1
 2 28 6 3 1 1
 2 28 6 4 1 1
 2 28 7 1 1 1
 2 28 7 2 1 1
 2 28 7 3 1 1
 2 28 7 4 2 1
 2 28 8 1 2 1
 2 28 8 2 2 1
 2 28 8 3 2 1
 2 28 8 4 1 1
 2 28 9 1 1 1
 2 28 9 2 1 1
 2 28 9 3 2 1
 2 28 9 4 1 1
 2 28 10 1 2 1
 2 28 10 2 1 1
 2 28 10 3 1 1
 2 28 10 4 1 1
 2 28 11 1 1 1
 2 28 11 2 2 1
 2 28 11 3 1 1
 2 28 11 4 2 1
 2 28 12 1 2 1
 2 28 12 2 2 1
 2 28 12 3 2 1
 2 28 12 4 2 1
 2 28 13 1 1 1
 2 28 13 2 2 1
 2 28 13 3 2 1
 2 28 13 4 1 1
 2 28 14 1 1 1
 2 28 14 2 1 1
 2 28 14 3 1 1
 2 28 14 4 1 1
 2 28 15 1 1 1
 2 28 15 2 1 1
 2 28 15 3 1 1
 2 28 15 4 1 1
 2 28 16 1 1 1
 2 28 16 2 2 1
 2 28 16 3 1 1
 2 28 16 4 2 1
 2 28 17 1 1 1
 2 28 17 2 1 1
 2 28 17 3 1 1
 2 28 17 4 2 1
 2 28 18 1 1 1
 2 28 18 2 2 1
 2 28 18 3 2 1
 2 28 18 4 1 1
 2 28 19 1 1 1
 2 28 19 2 2 1
 2 28 19 3 1 1
 2 28 19 4 1 1
 2 28 20 1 1 1
 2 28 20 2 1 1
 2 28 20 3 1 1
 2 28 20 4 1 1
 2 28 21 1 1 1
 2 28 21 2 1 1
 2 28 21 3 2 1
 2 28 21 4 2 1
 2 28 22 1 1 1
 2 28 22 2 1 1
 2 28 22 3 2 1
 2 28 22 4 1 1
 2 28 23 1 1 1
 2 28 23 2 2 1
 2 28 23 3 1 1
 2 28 23 4 2 1
 2 28 24 1 2 1
 2 28 24 2 1 1
 2 28 24 3 1 1
 2 28 24 4 1 1
 2 28 25 1 1 1
 2 28 25 2 2 1
 2 28 25 3 1 1
 2 28 25 4 1 1
 2 28 26 1 1 1
 2 28 26 2 1 1
 2 28 26 3 1 1
 2 28 26 4 1 1
 2 28 27 1 2 1
 2 28 27 2 1 1
 2 28 27 3 2 1
 2 28 27 4 2 1
 2 28 28 1 2 1
 2 28 28 2 1 1
 2 28 28 3 1 1
 2 28 28 4 1 1
 2 28 29 1 1 1
 2 28 29 2 1 1
 2 28 29 3 1 1
 2 28 29 4 2 1
 2 28 30 1 1 1
 2 28 30 2 1 1
 2 28 30 3 2 1
 2 28 30 4 2 1
 2 28 31 1 1 1
 2 28 31 2 1 1
 2 28 31 3 1 1
 2 28 31 4 1 1
 2 28 32 1 2 1
 2 28 32 2 1 1
 2 28 32 3 1 1
 2 28 32 4 2 1
 2 29 1 1 1 1
 2 29 1 2 2 1
 2 29 1 3 1 1
 2 29 1 4 1 1
 2 29 2 1 2 1
 2 29 2 2 1 1
 2 29 2 3 2 1
 2 29 2 4 2 1
 2 29 3 1 1 1
 2 29 3 2 1 1
 2 29 3 3 1 1
 2 29 3 4 1 1
 2 29 4 1 2 1
 2 29 4 2 1 1
 2 29 4 3 1 1
 2 29 4 4 1 1
 2 29 5 1 1 1
 2 29 5 2 1 1
 2 29 5 3 1 1
 2 29 5 4 1 1
 2 29 6 1 1 1
 2 29 6 2 2 1
 2 29 6 3 1 1
 2 29 6 4 1 1
 2 29 7 1 2 1
 2 29 7 2 2 1
 2 29 7 3 2 1
 2 29 7 4 2 1
 2 29 8 1 1 1
 2 29 8 2 1 1
 2 29 8 3 2 1
 2 29 8 4 1 1
 2 29 9 1 1 1
 2 29 9 2 1 1
 2 29 9 3 2 1
 2 29 9 4 1 1
 2 29 10 1 1 1
 2 29 10 2 2 1
 2 29 10 3 1 1
 2 29 10 4 1 1
 2 29 11 1 1 1
 2 29 11 2 1 1
 2 29 11 3 1 1
 2 29 11 4 1 1
 2 29 12 1 1 1
 2 29 12 2 1 1
 2 29 12 3 1 1
 2 29 12 4 2 1
 2 29 13 1 2 1
 2 29 13 2 2 1
 2 29 13 3 1 1
 2 29 13 4 1 1
 2 29 14 1 1 1
 2 29 14 2 2 1
 2 29 14 3 2 1
 2 29 14 4 1 1
 2 29 15 1 1 1
 2 29 15 2 2 1
 2 29 15 3 2 1
 2 29 15 4 2 1
 2 29 16 1 2 1
 2 29 16 2 2 1
 2 29 16 3 2 1
 2 29 16 4 2 1
 2 29 17 1 1 1
 2 29 17 2 1 1
 2 29 17 3 2 1
 2 29 17 4 2 1
 2 29 18 1 1 1
 2 29 18 2 2 1
 2 29 18 3 1 1
 2 29 18 4 1 1
 2 29 19 1 1 1
 2 29 19 2 1 1
 2 29 19 3 1 1
 2 29 19 4 1 1
 2 29 20 1 1 1
 2 29 20 2 2 1
 2 29 20 3 2 1
 2 29 20 4 1 1
 2 29 21 1 1 1
 2 29 21 2 1 1
 2 29 21 3 1 1
 2 29 21 4 1 1
 2 29 22 1 1 1
 2 29 22 2 1 1
 2 29 22 3 1 1
 2 29 22 4 1 1
 2 29 23 1 1 1
 2 29 23 2 1 1
 2 29 23 3 1 1
 2 29 23 4 1 1
 2 29 24 1 1 1
 2 29 24 2 1 1
 2 29 24 3 2 1
 2 29 24 4 1 1
 2 29 25 1 1 1
 2 29 25 2 2 1
 2 29 25 3 1 1
 2 29 25 4 1 1
 2 29 26 1 1 1
 2 29 26 2 1 1
 2 29 26 3 1 1
 2 29 26 4 1 1
 2 29 27 1 1 1
 2 29 27 2 1 1
 2 29 27 3 1 1
 2 29 27 4 2 1
 2 29 28 1 2 1
 2 29 28 2 2 1
 2 29 28 3 1 1
 2 29 28 4 1 1
 2 29 29 1 1 1
 2 29 29 2 1 1
 2 29 29 3 1 1
 2 29 29 4 1 1
 2 29 30 1 1 1
 2 29 30 2 2 1
 2 29 30 3 1 1
 2 29 30 4 2 1
 2 29 31 1 1 1
 2 29 31 2 1 1
 2 29 31 3 1 1
 2 29 31 4 1 1
 2 29 32 1 1 1
 2 29 32 2 1 1
 2 29 32 3 1 1
 2 29 32 4 1 1
 2 30 1 1 1 1
 2 30 1 2 1 1
 2 30 1 3 1 1
 2 30 1 4 1 1
 2 30 2 1 2 1
 2 30 2 2 1 1
 2 30 2 3 1 1
 2 30 2 4 2 1
 2 30 3 1 1 1
 2 30 3 2 2 1
 2 30 3 3 1 1
 2 30 3 4 2 1
 2 30 4 1 1 1
 2 30 4 2 1 1
 2 30 4 3 1 1
 2 30 4 4 2 1
 2 30 5 1 1 1
 2 30 5 2 1 1
 2 30 5 3 1 1
 2 30 5 4 1 1
 2 30 6 1 2 1
 2 30 6 2 1 1
 2 30 6 3 2 1
 2 30 6 4 2 1
 2 30 7 1 1 1
 2 30 7 2 1 1
 2 30 7 3 1 1
 2 30 7 4 1 1
 2 30 8 1 1 1
 2 30 8 2 1 1
 2 30 8 3 1 1
 2 30 8 4 2 1
 2 30 9 1 2 1
 2 30 9 2 2 1
 2 30 9 3 1 1
 2 30 9 4 1 1
 2 30 10 1 2 1
 2 30 10 2 1 1
 2 30 10 3 2 1
 2 30 10 4 1 1
 2 30 11 1 2 1
 2 30 11 2 1 1
 2 30 11 3 2 1
 2 30 11 4 2 1
 2 30 12 1 1 1
 2 30 12 2 1 1
 2 30 12 3 1 1
 2 30 12 4 1 1
 2 30 13 1 1 1
 2 30 13 2 1 1
 2 30 13 3 1 1
 2 30 13 4 2 1
 2 30 14 1 1 1
 2 30 14 2 2 1
 2 30 14 3 1 1
 2 30 14 4 1 1
 2 30 15 1 2 1
 2 30 15 2 2 1
 2 30 15 3 1 1
 2 30 15 4 2 1
 2 30 16 1 1 1
 2 30 16 2 2 1
 2 30 16 3 2 1
 2 30 16 4 1 1
 2 30 17 1 1 1
 2 30 17 2 2 1
 2 30 17 3 2 1
 2 30 17 4 2 1
 2 30 18 1 1 1
 2 30 18 2 2 1
 2 30 18 3 1 1
 2 30 18 4 1 1
 2 30 19 1 1 1
 2 30 19 2 2 1
 2 30 19 3 1 1
 2 30 19 4 2 1
 2 30 20 1 1 1
 2 30 20 2 1 1
 2 30 20 3 1 1
 2 30 20 4 1 1
 2 30 21 1 1 1
 2 30 21 2 1 1
 2 30 21 3 1 1
 2 30 21 4 2 1
 2 30 22 1 2 1
 2 30 22 2 1 1
 2 30 22 3 1 1
 2 30 22 4 1 1
 2 30 23 1 1 1
 2 30 23 2 1 1
 2 30 23 3 1 1
 2 30 23 4 1 1
 2 30 24 1 1 1
 2 30 24 2 2 1
 2 30 24 3 1 1
 2 30 24 4 1 1
 2 30 25 1 1 1
 2 30 25 2 2 1
 2 30 25 3 1 1
 2 30 25 4 1 1
 2 30 26 1 1 1
 2 30 26 2 1 1
 2 30 26 3 2 1
 2 30 26 4 1 1
 2 30 27 1 1 1
 2 30 27 2 2 1
 2 30 27 3 1 1
 2 30 27 4 1 1
 2 30 28 1 1 1
 2 30 28 2 1 1
 2 30 28 3 1 1
 2 30 28 4 2 1
 2 30 29 1 1 1
 2 30 29 2 1 1
 2 30 29 3 2 1
 2 30 29 4 1 1
 2 30 30 1 1 1
 2 30 30 2 1 1
 2 30 30 3 2 1
 2 30 30 4 2 1
 2 30 31 1 1 1
 2 30 31 2 1 1
 2 30 31 3 1 1
 2 30 31 4 1 1
 2 30 32 1 1 1
 2 30 32 2 2 1
 2 30 32 3 2 1
 2 30 32 4 1 1
 2 31 1 1 1 1
 2 31 1 2 1 1
 2 31 1 3 1 1
 2 31 1 4 2 1
 2 31 2 1 1 1
 2 31 2 2 1 1
 2 31 2 3 2 1
 2 31 2 4 1 1
 2 31 3 1 2 1
 2 31 3 2 2 1
 2 31 3 3 1 1
 2 31 3 4 2 1
 2 31 4 1 1 1
 2 31 4 2 2 1
 2 31 4 3 2 1
 2 31 4 4 1 1
 2 31 5 1 2 1
 2 31 5 2 1 1
 2 31 5 3 2 1
 2 31 5 4 2 1
 2 31 6 1 2 1
 2 31 6 2 2 1
 2 31 6 3 2 1
 2 31 6 4 1 1
 2 31 7 1 2 1
 2 31 7 2 1 1
 2 31 7 3 2 1
 2 31 7 4 2 1
 2 31 8 1 1 1
 2 31 8 2 2 1
 2 31 8 3 1 1
 2 31 8 4 1 1
 2 31 9 1 2 1
 2 31 9 2 1 1
 2 31 9 3 1 1
 2 31 9 4 2 1
 2 31 10 1 1 1
 2 31 10 2 2 1
 2 31 10 3 1 1
 2 31 10 4 2 1
 2 31 11 1 1 1
 2 31 11 2 1 1
 2 31 11 3 1 1
 2 31 11 4 2 1
 2 31 12 1 1 1
 2 31 12 2 1 1
 2 31 12 3 2 1
 2 31 12 4 1 1
 2 31 13 1 1 1
 2 31 13 2 1 1
 2 31 13 3 1 1
 2 31 13 4 1 1
 2 31 14 1 1 1
 2 31 14 2 1 1
 2 31 14 3 1 1
 2 31 14 4 2 1
 2 31 15 1 2 1
 2 31 15 2 1 1
 2 31 15 3 2 1
 2 31 15 4 1 1
 2 31 16 1 1 1
 2 31 16 2 2 1
 2 31 16 3 1 1
 2 31 16 4 1 1
 2 31 17 1 1 1
 2 31 17 2 1 1
 2 31 17 3 2 1
 2 31 17 4 2 1
 2 31 18 1 1 1
 2 31 18 2 1 1
 2 31 18 3 1 1
 2 31 18 4 1 1
 2 31 19 1 2 1
 2 31 19 2 1 1
 2 31 19 3 1 1
 2 31 19 4 1 1
 2 31 20 1 1 1
 2 31 20 2 1 1
 2 31 20 3 1 1
 2 31 20 4 1 1
 2 31 21 1 1 1
 2 31 21 2 1 1
 2 31 21 3 2 1
 2 31 21 4 2 1
 2 31 22 1 1 1
 2 31 22 2 2 1
 2 31 22 3 1 1
 2 31 22 4 1 1
 2 31 23 1 1 1
 2 31 23 2 1 1
 2 31 23 3 2 1
 2 31 23 4 1 1
 2 31 24 1 2 1
 2 31 24 2 1 1
 2 31 24 3 1 1
 2 31 24 4 2 1
 2 31 25 1 2 1
 2 31 25 2 1 1
 2 31 25 3 1 1
 2 31 25 4 1 1
 2 31 26 1 1 1
 2 31 26 2 1 1
 2 31 26 3 2 1
 2 31 26 4 2 1
 2 31 27 1 1 1
 2 31 27 2 1 1
 2 31 27 3 1 1
 2 31 27 4 1 1
 2 31 28 1 1 1
 2 31 28 2 1 1
 2 31 28 3 1 1
 2 31 28 4 1 1
 2 31 29 1 1 1
 2 31 29 2 1 1
 2 31 29 3 1 1
 2 31 29 4 2 1
 2 31 30 1 1 1
 2 31 30 2 1 1
 2 31 30 3 1 1
 2 31 30 4 1 1
 2 31 31 1 2 1
 2 31 31 2 1 1
 2 31 31 3 2 1
 2 31 31 4 1 1
 2 31 32 1 1 1
 2 31 32 2 2 1
 2 31 32 3 1 1
 2 31 32 4 1 1
 2 32 1 1 1 1
 2 32 1 2 1 1
 2 32 1 3 1 1
 2 32 1 4 1 1
 2 32 2 1 1 1
 2 32 2 2 1 1
 2 32 2 3 1 1
 2 32 2 4 1 1
 2 32 3 1 1 1
 2 32 3 2 2 1
 2 32 3 3 1 1
 2 32 3 4 2 1
 2 32 4 1 2 1
 2 32 4 2 2 1
 2 32 4 3 1 1
 2 32 4 4 1 1
 2 32 5 1 1 1
 2 32 5 2 1 1
 2 32 5 3 1 1
 2 32 5 4 2 1
 2 32 6 1 2 1
 2 32 6 2 1 1
 2 32 6 3 2 1
 2 32 6 4 1 1
 2 32 7 1 1 1
 2 32 7 2 1 1
 2 32 7 3 1 1
 2 32 7 4 2 1
 2 32 8 1 1 1
 2 32 8 2 1 1
 2 32 8 3 1 1
 2 32 8 4 2 1
 2 32 9 1 1 1
 2 32 9 2 2 1
 2 32 9 3 1 1
 2 32 9 4 2 1
 2 32 10 1 2 1
 2 32 10 2 1 1
 2 32 10 3 2 1
 2 32 10 4 1 1
 2 32 11 1 1 1
 2 32 11 2 2 1
 2 32 11 3 1 1
 2 32 11 4 1 1
 2 32 12 1 1 1
 2 32 12 2 2 1
 2 32 12 3 1 1
 2 32 12 4 1 1
 2 32 13 1 2 1
 2 32 13 2 1 1
 2 32 13 3 1 1
 2 32 13 4 1 1
 2 32 14 1 1 1
 2 32 14 2 1 1
 2 32 14 3 2 1
 2 32 14 4 1 1
 2 32 15 1 1 1
 2 32 15 2 1 1
 2 32 15 3 1 1
 2 32 15 4 1 1
 2 32 16 1 2 1
 2 32 16 2 1 1
 2 32 16 3 2 1
 2 32 16 4 1 1
 2 32 17 1 2 1
 2 32 17 2 2 1
 2 32 17 3 1 1
 2 32 17 4 1 1
 2 32 18 1 2 1
 2 32 18 2 1 1
 2 32 18 3 2 1
 2 32 18 4 1 1
 2 32 19 1 1 1
 2 32 19 2 1 1
 2 32 19 3 2 1
 2 32 19 4 1 1
 2 32 20 1 1 1
 2 32 20 2 1 1
 2 32 20 3 2 1
 2 32 20 4 2 1
 2 32 21 1 1 1
 2 32 21 2 1 1
 2 32 21 3 2 1
 2 32 21 4 1 1
 2 32 22 1 1 1
 2 32 22 2 2 1
 2 32 22 3 1 1
 2 32 22 4 2 1
 2 32 23 1 2 1
 2 32 23 2 1 1
 2 32 23 3 1 1
 2 32 23 4 2 1
 2 32 24 1 1 1
 2 32 24 2 1 1
 2 32 24 3 1 1
 2 32 24 4 2 1
 2 32 25 1 1 1
 2 32 25 2 1 1
 2 32 25 3 1 1
 2 32 25 4 2 1
 2 32 26 1 1 1
 2 32 26 2 1 1
 2 32 26 3 1 1
 2 32 26 4 1 1
 2 32 27 1 1 1
 2 32 27 2 2 1
 2 32 27 3 2 1
 2 32 27 4 1 1
 2 32 28 1 1 1
 2 32 28 2 2 1
 2 32 28 3 1 1
 2 32 28 4 2 1
 2 32 29 1 1 1
 2 32 29 2 1 1
 2 32 29 3 2 1
 2 32 29 4 1 1
 2 32 30 1 2 1
 2 32 30 2 1 1
 2 32 30 3 1 1
 2 32 30 4 1 1
 2 32 31 1 2 1
 2 32 31 2 1 1
 2 32 31 3 1 1
 2 32 31 4 1 1
 2 32 32 1 1 1
 2 32 32 2 1 1
 2 32 32 3 2 1
 2 32 32 4 1 1
 3 1 1 1 1 1
 3 1 1 2 1 1
 3 1 1 3 1 1
 3 1 1 4 1 1
 3 1 2 1 2 1
 3 1 2 2 2 1
 3 1 2 3 1 1
 3 1 2 4 2 1
 3 1 3 1 1 1
 3 1 3 2 1 1
 3 1 3 3 1 1
 3 1 3 4 2 1
 3 1 4 1 1 1
 3 1 4 2 2 1
 3 1 4 3 1 1
 3 1 4 4 2 1
 3 1 5 1 2 1
 3 1 5 2 1 1
 3 1 5 3 1 1
 3 1 5 4 1 1
 3 1 6 1 1 1
 3 1 6 2 1 1
 3 1 6 3 1 1
 3 1 6 4 1 1
 3 1 7 1 1 1
 3 1 7 2 1 1
 3 1 7 3 2 1
 3 1 7 4 1 1
 3 1 8 1 1 1
 3 1 8 2 1 1
 3 1 8 3 1 1
 3 1 8 4 1 1
 3 1 9 1 1 1
 3 1 9 2 1 1
 3 1 9 3 1 1
 3 1 9 4 1 1
 3 1 10 1 1 1
 3 1 10 2 2 1
 3 1 10 3 2 1
 3 1 10 4 1 1
 3 1 11 1 2 1
 3 1 11 2 1 1
 3 1 11 3 1 1
 3 1 11 4 1 1
 3 1 12 1 1 1
 3 1 12 2 1 1
 3 1 12 3 2 1
 3 1 12 4 2 1
 3 1 13 1 2 1
 3 1 13 2 2 1
 3 1 13 3 2 1
 3 1 13 4 1 1
 3 1 14 1 1 1
 3 1 14 2 1 1
 3 1 14 3 1 1
 3 1 14 4 2 1
 3 1 15 1 1 1
 3 1 15 2 1 1
 3 1 15 3 2 1
 3 1 15 4 2 1
 3 1 16 1 2 1
 3 1 16 2 1 1
 3 1 16 3 1 1
 3 1 16 4 1 1
 3 1 17 1 2 1
 3 1 17 2 1 1
 3 1 17 3 1 1
 3 1 17 4 2 1
 3 1 18 1 1 1
 3 1 18 2 1 1
 3 1 18 3 1 1
 3 1 18 4 2 1
 3 1 19 1 2 1
 3 1 19 2 1 1
 3 1 19 3 1 1
 3 1 19 4 1 1
 3 1 20 1 2 1
 3 1 20 2 1 1
 3 1 20 3 1 1
 3 1 20 4 1 1
 3 1 21 1 1 1
 3 1 21 2 1 1
 3 1 21 3 2 1
 3 1 21 4 2 1
 3 1 22 1 1 1
 3 1 22 2 1 1
 3 1 22 3 2 1
 3 1 22 4 1 1
 3 1 23 1 2 1
 3 1 23 2 1 1
 3 1 23 3 1 1
 3 1 23 4 2 1
 3 1 24 1 1 1
 3 1 24 2 1 1
 3 1 24 3 1 1
 3 1 24 4 1 1
 3 1 25 1 1 1
 3 1 25 2 1 1
 3 1 25 3 2 1
 3 1 25 4 1 1
 3 1 26 1 1 1
 3 1 26 2 1 1
 3 1 26 3 2 1
 3 1 26 4 2 1
 3 1 27 1 1 1
 3 1 27 2 2 1
 3 1 27 3 1 1
 3 1 27 4 1 1
 3 1 28 1 2 1
 3 1 28 2 1 1
 3 1 28 3 1 1
 3 1 28 4 1 1
 3 1 29 1 2 1
 3 1 29 2 1 1
 3 1 29 3 2 1
 3 1 29 4 1 1
 3 1 30 1 2 1
 3 1 30 2 1 1
 3 1 30 3 1 1
 3 1 30 4 1 1
 3 1 31 1 2 1
 3 1 31 2 2 1
 3 1 31 3 1 1
 3 1 31 4 1 1
 3 1 32 1 1 1
 3 1 32 2 1 1
 3 1 32 3 1 1
 3 1 32 4 2 1
 3 2 1 1 2 1
 3 2 1 2 1 1
 3 2 1 3 2 1
 3 2 1 4 1 1
 3 2 2 1 1 1
 3 2 2 2 2 1
 3 2 2 3 1 1
 3 2 2 4 2 1
 3 2 3 1 2 1
 3 2 3 2 2 1
 3 2 3 3 2 1
 3 2 3 4 2 1
 3 2 4 1 2 1
 3 2 4 2 1 1
 3 2 4 3 1 1
 3 2 4 4 1 1
 3 2 5 1 1 1
 3 2 5 2 1 1
 3 2 5 3 2 1
 3 2 5 4 1 1
 3 2 6 1 2 1
 3 2 6 2 1 1
 3 2 6 3 1 1
 3 2 6 4 2 1
 3 2 7 1 1 1
 3 2 7 2 1 1
 3 2 7 3 2 1
 3 2 7 4 1 1
 3 2 8 1 1 1
 3 2 8 2 1 1
 3 2 8 3 2 1
 3 2 8 4 2 1
 3 2 9 1 1 1
 3 2 9 2 1 1
 3 2 9 3 1 1
 3 2 9 4 1 1
 3 2 10 1 1 1
 3 2 10 2 1 1
 3 2 10 3 1 1
 3 2 10 4 1 1
 3 2 11 1 2 1
 3 2 11 2 2 1
 3 2 11 3 1 1
 3 2 11 4 1 1
 3 2 12 1 1 1
 3 2 12 2 1 1
 3 2 12 3 1 1
 3 2 12 4 1 1
 3 2 13 1 1 1
 3 2 13 2 2 1
 3 2 13 3 1 1
 3 2 13 4 1 1
 3 2 14 1 1 1
 3 2 14 2 1 1
 3 2 14 3 1 1
 3 2 14 4 1 1
 3 2 15 1 1 1
 3 2 15 2 1 1
 3 2 15 3 1 1
 3 2 15 4 1 1
 3 2 16 1 1 1
 3 2 16 2 1 1
 3 2 16 3 2 1
 3 2 16 4 2 1
 3 2 17 1 1 1
 3 2 17 2 1 1
 3 2 17 3 1 1
 3 2 17 4 1 1
 3 2 18 1 1 1
 3 2 18 2 1 1
 3 2 18 3 1 1
 3 2 18 4 1 1
 3 2 19 1 1 1
 3 2 19 2 1 1
 3 2 19 3 1 1
 3 2 19 4 2 1
 3 2 20 1 1 1
 3 2 20 2 1 1
 3 2 20 3 2 1
 3 2 20 4 1 1
 3 2 21 1 1 1
 3 2 21 2 2 1
 3 2 21 3 2 1
 3 2 21 4 1 1
 3 2 22 1 1 1
 3 2 22 2 1 1
 3 2 22 3 1 1
 3 2 22 4 1 1
 3 2 23 1 2 1
 3 2 23 2 1 1
 3 2 23 3 1 1
 3 2 23 4 1 1
 3 2 24 1 2 1
 3 2 24 2 1 1
 3 2 24 3 1 1
 3 2 24 4 1 1
 3 2 25 1 1 1
 3 2 25 2 1 1
 3 2 25 3 1 1
 3 2 25 4 2 1
 3 2 26 1 2 1
 3 2 26 2 1 1
 3 2 26 3 1 1
 3 2 26 4 1 1
 3 2 27 1 1 1
 3 2 27 2 2 1
 3 2 27 3 1 1
 3 2 27 4 1 1
 3 2 28 1 2 1
 3 2 28 2 1 1
 3 2 28 3 1 1
 3 2 28 4 1 1
 3 2 29 1 1 1
 3 2 29 2 1 1
 3 2 29 3 1 1
 3 2 29 4 1 1
 3 2 30 1 1 1
 3 2 30 2 1 1
 3 2 30 3 1 1
 3 2 30 4 2 1
 3 2 31 1 1 1
 3 2 31 2 2 1
 3 2 31 3 1 1
 3 2 31 4 1 1
 3 2 32 1 2 1
 3 2 32 2 2 1
 3 2 32 3 1 1
 3 2 32 4 2 1
 3 3 1 1 1 1
 3 3 1 2 1 1
 3 3 1 3 2 1
 3 3 1 4 1 1
 3 3 2 1 1 1
 3 3 2 2 2 1
 3 3 2 3 1 1
 3 3 2 4 1 1
 3 3 3 1 2 1
 3 3 3 2 1 1
 3 3 3 3 1 1
 3 3 3 4 2 1
 3 3 4 1 1 1
 3 3 4 2 1 1
 3 3 4 3 2 1
 3 3 4 4 2 1
 3 3 5 1 1 1
 3 3 5 2 2 1
 3 3 5 3 2 1
 3 3 5 4 1 1
 3 3 6 1 1 1
 3 3 6 2 2 1
 3 3 6 3 2 1
 3 3 6 4 1 1
 3 3 7 1 1 1
 3 3 7 2 1 1
 3 3 7 3 1 1
 3 3 7 4 2 1
 3 3 8 1 1 1
 3 3 8 2 2 1
 3 3 8 3 1 1
 3 3 8 4 1 1
 3 3 9 1 1 1
 3 3 9 2 1 1
 3 3 9 3 1 1
 3 3 9 4 1 1
 3 3 10 1 1 1
 3 3 10 2 2 1
 3 3 10 3 2 1
 3 3 10 4 2 1
 3 3 11 1 1 1
 3 3 11 2 1 1
 3 3 11 3 2 1
 3 3 11 4 1 1
 3 3 12 1 2 1
 3 3 12 2 1 1
 3 3 12 3 2 1
 3 3 12 4 1 1
 3 3 13 1 1 1
 3 3 13 2 1 1
 3 3 13 3 2 1
 3 3 13 4 2 1
 3 3 14 1 2 1
 3 3 14 2 1 1
 3 3 14 3 1 1
 3 3 14 4 1 1
 3 3 15 1 1 1
 3 3 15 2 1 1
 3 3 15 3 1 1
 3 3 15 4 2 1
 3 3 16 1 2 1
 3 3 16 2 1 1
 3 3 16 3 2 1
 3 3 16 4 2 1
 3 3 17 1 1 1
 3 3 17 2 1 1
 3 3 17 3 2 1
 3 3 17 4 2 1
 3 3 18 1 1 1
 3 3 18 2 1 1
 3 3 18 3 1 1
 3 3 18 4 2 1
 3 3 19 1 1 1
 3 3 19 2 1 1
 3 3 19 3 1 1
 3 3 19 4 1 1
 3 3 20 1 2 1
 3 3 20 2 1 1
 3 3 20 3 1 1
 3 3 20 4 1 1
 3 3 21 1 1 1
 3 3 21 2 1 1
 3 3 21 3 1 1
 3 3 21 4 1 1
 3 3 22 1 1 1
 3 3 22 2 1 1
 3 3 22 3 1 1
 3 3 22 4 2 1
 3 3 23 1 1 1
 3 3 23 2 2 1
 3 3 23 3 1 1
 3 3 23 4 1 1
 3 3 24 1 1 1
 3 3 24 2 1 1
 3 3 24 3 1 1
 3 3 24 4 1 1
 3 3 25 1 2 1
 3 3 25 2 1 1
 3 3 25 3 1 1
 3 3 25 4 1 1
 3 3 26 1 2 1
 3 3 26 2 1 1
 3 3 26 3 2 1
 3 3 26 4 1 1
 3 3 27 1 1 1
 3 3 27 2 1 1
 3 3 27 3 2 1
 3 3 27 4 2 1
 3 3 28 1 1 1
 3 3 28 2 1 1
 3 3 28 3 1 1
 3 3 28 4 1 1
 3 3 29 1 1 1
 3 3 29 2 2 1
 3 3 29 3 1 1
 3 3 29 4 1 1
 3 3 30 1 2 1
 3 3 30 2 1 1
 3 3 30 3 1 1
 3 3 30 4 1 1
 3 3 31 1 1 1
 3 3 31 2 2 1
 3 3 31 3 1 1
 3 3 31 4 1 1
 3 3 32 1 2 1
 3 3 32 2 1 1
 3 3 32 3 2 1
 3 3 32 4 1 1
 3 4 1 1 1 1
 3 4 1 2 1 1
 3 4 1 3 1 1
 3 4 1 4 2 1
 3 4 2 1 2 1
 3 4 2 2 1 1
 3 4 2 3 2 1
 3 4 2 4 1 1
 3 4 3 1 1 1
 3 4 3 2 1 1
 3 4 3 3 1 1
 3 4 3 4 1 1
 3 4 4 1 2 1
 3 4 4 2 1 1
 3 4 4 3 1 1
 3 4 4 4 2 1
 3 4 5 1 2 1
 3 4 5 2 2 1
 3 4 5 3 2 1
 3 4 5 4 1 1
 3 4 6 1 1 1
 3 4 6 2 2 1
 3 4 6 3 1 1
 3 4 6 4 1 1
 3 4 7 1 1 1
 3 4 7 2 2 1
 3 4 7 3 1 1
 3 4 7 4 2 1
 3 4 8 1 1 1
 3 4 8 2 1 1
 3 4 8 3 2 1
 3 4 8 4 1 1
 3 4 9 1 1 1
 3 4 9 2 1 1
 3 4 9 3 1 1
 3 4 9 4 1 1
 3 4 10 1 1 1
 3 4 10 2 1 1
 3 4 10 3 2 1
 3 4 10 4 1 1
 3 4 11 1 2 1
 3 4 11 2 2 1
 3 4 11 3 1 1
 3 4 11 4 1 1
 3 4 12 1 1 1
 3 4 12 2 2 1
 3 4 12 3 2 1
 3 4 12 4 2 1
 3 4 13 1 2 1
 3 4 13 2 1 1
 3 4 13 3 1 1
 3 4 13 4 2 1
 3 4 14 1 2 1
 3 4 14 2 1 1
 3 4 14 3 1 1
 3 4 14 4 1 1
 3 4 15 1 1 1
 3 4 15 2 1 1
 3 4 15 3 1 1
 3 4 15 4 1 1
 3 4 16 1 1 1
 3 4 16 2 2 1
 3 4 16 3 1 1
 3 4 16 4 2 1
 3 4 17 1 1 1
 3 4 17 2 1 1
 3 4 17 3 1 1
 3 4 17 4 2 1
 3 4 18 1 2 1
 3 4 18 2 1 1
 3 4 18 3 2 1
 3 4 18 4 1 1
 3 4 19 1 1 1
 3 4 19 2 1 1
 3 4 19 3 2 1
 3 4 19 4 2 1
 3 4 20 1 1 1
 3 4 20 2 1 1
 3 4 20 3 1 1
 3 4 20 4 2 1
 3 4 21 1 2 1
 3 4 21 2 1 1
 3 4 21 3 1 1
 3 4 21 4 1 1
 3 4 22 1 1 1
 3 4 22 2 1 1
 3 4 22 3 1 1
 3 4 22 4 1 1
 3 4 23 1 1 1
 3 4 23 2 2 1
 3 4 23 3 1 1
 3 4 23 4 1 1
 3 4 24 1 2 1
 3 4 24 2 1 1
 3 4 24 3 1 1
 3 4 24 4 1 1
 3 4 25 1 1 1
 3 4 25 2 2 1
 3 4 25 3 1 1
 3 4 25 4 1 1
 3 4 26 1 2 1
 3 4 26 2 1 1
 3 4 26 3 1 1
 3 4 26 4 1 1
 3 4 27 1 2 1
 3 4 27 2 1 1
 3 4 27 3 1 1
 3 4 27 4 2 1
 3 4 28 1 1 1
 3 4 28 2 1 1
 3 4 28 3 1 1
 3 4 28 4 1 1
 3 4 29 1 1 1
 3 4 29 2 1 1
 3 4 29 3 1 1
 3 4 29 4 1 1
 3 4 30 1 2 1
 3 4 30 2 2 1
 3 4 30 3 2 1
 3 4 30 4 2 1
 3 4 31 1 1 1
 3 4 31 2 1 1
 3 4 31 3 1 1
 3 4 31 4 2 1
 3 4 32 1 1 1
 3 4 32 2 2 1
 3 4 32 3 1 1
 3 4 32 4 1 1
 3 5 1 1 2 1
 3 5 1 2 2 1
 3 5 1 3 1 1
 3 5 1 4 1 1
 3 5 2 1 2 1
 3 5 2 2 2 1
 3 5 2 3 1 1
 3 5 2 4 2 1
 3 5 3 1 1 1
 3 5 3 2 2 1
 3 5 3 3 2 1
 3 5 3 4 1 1
 3 5 4 1 2 1
 3 5 4 2 2 1
 3 5 4 3 1 1
 3 5 4 4 1 1
 3 5 5 1 2 1
 3 5 5 2 1 1
 3 5 5 3 1 1
 3 5 5 4 2 1
 3 5 6 1 1 1
 3 5 6 2 1 1
 3 5 6 3 1 1
 3 5 6 4 1 1
 3 5 7 1 2 1
 3 5 7 2 1 1
 3 5 7 3 1 1
 3 5 7 4 1 1
 3 5 8 1 2 1
 3 5 8 2 1 1
 3 5 8 3 1 1
 3 5 8 4 1 1
 3 5 9 1 2 1
 3 5 9 2 1 1
 3 5 9 3 2 1
 3 5 9 4 1 1
 3 5 10 1 1 1
 3 5 10 2 1 1
 3 5 10 3 1 1
 3 5 10 4 1 1
 3 5 11 1 1 1
 3 5 11 2 1 1
 3 5 11 3 1 1
 3 5 11 4 2 1
 3 5 12 1 1 1
 3 5 12 2 1 1
 3 5 12 3 1 1
 3 5 12 4 2 1
 3 5 13 1 1 1
 3 5 13 2 1 1
 3 5 13 3 1 1
 3 5 13 4 2 1
 3 5 14 1 1 1
 3 5 14 2 2 1
 3 5 14 3 1 1
 3 5 14 4 1 1
 3 5 15 1 1 1
 3 5 15 2 1 1
 3 5 15 3 1 1
 3 5 15 4 2 1
 3 5 16 1 2 1
 3 5 16 2 1 1
 3 5 16 3 2 1
 3 5 16 4 2 1
 3 5 17 1 2 1
 3 5 17 2 2 1
 3 5 17 3 1 1
 3 5 17 4 1 1
 3 5 18 1 2 1
 3 5 18 2 2 1
 3 5 18 3 1 1
 3 5 18 4 2 1
 3 5 19 1 1 1
 3 5 19 2 1 1
 3 5 19 3 1 1
 3 5 19 4 1 1
 3 5 20 1 1 1
 3 5 20 2 1 1
 3 5 20 3 1 1
 3 5 20 4 1 1
 3 5 21 1 1 1
 3 5 21 2 2 1
 3 5 21 3 1 1
 3 5 21 4 1 1
 3 5 22 1 1 1
 3 5 22 2 1 1
 3 5 22 3 1 1
 3 5 22 4 1 1
 3 5 23 1 1 1
 3 5 23 2 1 1
 3 5 23 3 2 1
 3 5 23 4 2 1
 3 5 24 1 2 1
 3 5 24 2 2 1
 3 5 24 3 1 1
 3 5 24 4 1 1
 3 5 25 1 1 1
 3 5 25 2 2 1
 3 5 25 3 1 1
 3 5 25 4 1 1
 3 5 26 1 2 1
 3 5 26 2 2 1
 3 5 26 3 1 1
 3 5 26 4 2 1
 3 5 27 1 1 1
 3 5 27 2 2 1
 3 5 27 3 1 1
 3 5 27 4 2 1
 3 5 28 1 1 1
 3 5 28 2 1 1
 3 5 28 3 1 1
 3 5 28 4 1 1
 3 5 29 1 1 1
 3 5 29 2 1 1
 3 5 29 3 2 1
 3 5 29 4 1 1
 3 5 30 1 1 1
 3 5 30 2 2 1
 3 5 30 3 1 1
 3 5 30 4 1 1
 3 5 31 1 1 1
 3 5 31 2 1 1
 3 5 31 3 1 1
 3 5 31 4 2 1
 3 5 32 1 1 1
 3 5 32 2 2 1
 3 5 32 3 1 1
 3 5 32 4 2 1
 3 6 1 1 2 1
 3 6 1 2 1 1
 3 6 1 3 1 1
 3 6 1 4 1 1
 3 6 2 1 1 1
 3 6 2 2 2 1
 3 6 2 3 1 1
 3 6 2 4 1 1
 3 6 3 1 1 1
 3 6 3 2 1 1
 3 6 3 3 2 1
 3 6 3 4 1 1
 3 6 4 1 1 1
 3 6 4 2 1 1
 3 6 4 3 1 1
 3 6 4 4 2 1
 3 6 5 1 2 1
 3 6 5 2 1 1
 3 6 5 3 1 1
 3 6 5 4 1 1
 3 6 6 1 1 1
 3 6 6 2 1 1
 3 6 6 3 1 1
 3 6 6 4 2 1
 3 6 7 1 2 1
 3 6 7 2 2 1
 3 6 7 3 1 1
 3 6 7 4 2 1
 3 6 8 1 1 1
 3 6 8 2 1 1
 3 6 8 3 1 1
 3 6 8 4 1 1
 3 6 9 1 1 1
 3 6 9 2 1 1
 3 6 9 3 1 1
 3 6 9 4 2 1
 3 6 10 1 1 1
 3 6 10 2 1 1
 3 6 10 3 1 1
 3 6 10 4 2 1
 3 6 11 1 1 1
 3 6 11 2 1 1
 3 6 11 3 1 1
 3 6 11 4 1 1
 3 6 12 1 1 1
 3 6 12 2 1 1
 3 6 12 3 1 1
 3 6 12 4 2 1
 3 6 13 1 1 1
 3 6 13 2 1 1
 3 6 13 3 1 1
 3 6 13 4 1 1
 3 6 14 1 2 1
 3 6 14 2 1 1
 3 6 14 3 1 1
 3 6 14 4 1 1
 3 6 15 1 2 1
 3 6 15 2 1 1
 3 6 15 3 1 1
 3 6 15 4 2 1
 3 6 16 1 1 1
 3 6 16 2 2 1
 3 6 16 3 2 1
 3 6 16 4 1 1
 3 6 17 1 2 1
 3 6 17 2 1 1
 3 6 17 3 2 1
 3 6 17 4 2 1
 3 6 18 1 1 1
 3 6 18 2 1 1
 3 6 18 3 1 1
 3 6 18 4 1 1
 3 6 19 1 2 1
 3 6 19 2 1 1
 3 6 19 3 1 1
 3 6 19 4 1 1
 3 6 20 1 1 1
 3 6 20 2 1 1
 3 6 20 3 1 1
 3 6 20 4 2 1
 3 6 21 1 1 1
 3 6 21 2 2 1
 3 6 21 3 2 1
 3 6 21 4 1 1
 3 6 22 1 2 1
 3 6 22 2 1 1
 3 6 22 3 1 1
 3 6 22 4 2 1
 3 6 23 1 1 1
 3 6 23 2 1 1
 3 6 23 3 2 1
 3 6 23 4 2 1
 3 6 24 1 1 1
 3 6 24 2 1 1
 3 6 24 3 2 1
 3 6 24 4 2 1
 3 6 25 1 1 1
 3 6 25 2 1 1
 3 6 25 3 2 1
 3 6 25 4 1 1
 3 6 26 1 2 1
 3 6 26 2 1 1
 3 6 26 3 1 1
 3 6 26 4 1 1
 3 6 27 1 1 1
 3 6 27 2 2 1
 3 6 27 3 2 1
 3 6 27 4 1 1
 3 6 28 1 2 1
 3 6 28 2 1 1
 3 6 28 3 2 1
 3 6 28 4 1 1
 3 6 29 1 1 1
 3 6 29 2 1 1
 3 6 29 3 1 1
 3 6 29 4 2 1
 3 6 30 1 1 1
 3 6 30 2 1 1
 3 6 30 3 2 1
 3 6 30 4 2 1
 3 6 31 1 2 1
 3 6 31 2 2 1
 3 6 31 3 1 1
 3 6 31 4 1 1
 3 6 32 1 1 1
 3 6 32 2 2 1
 3 6 32 3 1 1
 3 6 32 4 2 1
 3 7 1 1 1 1
 3 7 1 2 2 1
 3 7 1 3 1 1
 3 7 1 4 2 1
 3 7 2 1 1 1
 3 7 2 2 1 1
 3 7 2 3 1 1
 3 7 2 4 2 1
 3 7 3 1 2 1
 3 7 3 2 1 1
 3 7 3 3 1 1
 3 7 3 4 2 1
 3 7 4 1 2 1
 3 7 4 2 1 1
 3 7 4 3 2 1
 3 7 4 4 1 1
 3 7 5 1 1 1
 3 7 5 2 1 1
 3 7 5 3 2 1
 3 7 5 4 2 1
 3 7 6 1 1 1
 3 7 6 2 1 1
 3 7 6 3 1 1
 3 7 6 4 1 1
 3 7 7 1 2 1
 3 7 7 2 2 1
 3 7 7 3 2 1
 3 7 7 4 2 1
 3 7 8 1 2 1
 3 7 8 2 1 1
 3 7 8 3 1 1
 3 7 8 4 1 1
 3 7 9 1 1 1
 3 7 9 2 1 1
 3 7 9 3 1 1
 3 7 9 4 2 1
 3 7 10 1 2 1
 3 7 10 2 1 1
 3 7 10 3 1 1
 3 7 10 4 1 1
 3 7 11 1 2 1
 3 7 11 2 1 1
 3 7 11 3 1 1
 3 7 11 4 2 1
 3 7 12 1 1 1
 3 7 12 2 1 1
 3 7 12 3 1 1
 3 7 12 4 1 1
 3 7 13 1 1 1
 3 7 13 2 1 1
 3 7 13 3 1 1
 3 7 13 4 2 1
 3 7 14 1 1 1
 3 7 14 2 1 1
 3 7 14 3 1 1
 3 7 14 4 2 1
 3 7 15 1 1 1
 3 7 15 2 2 1
 3 7 15 3 1 1
 3 7 15 4 1 1
 3 7 16 1 2 1
 3 7 16 2 1 1
 3 7 16 3 1 1
 3 7 16 4 1 1
 3 7 17 1 1 1
 3 7 17 2 1 1
 3 7 17 3 1 1
 3 7 17 4 2 1
 3 7 18 1 2 1
 3 7 18 2 1 1
 3 7 18 3 1 1
 3 7 18 4 1 1
 3 7 19 1 2 1
 3 7 19 2 1 1
 3 7 19 3 1 1
 3 7 19 4 2 1
 3 7 20 1 2 1
 3 7 20 2 1 1
 3 7 20 3 2 1
 3 7 20 4 2 1
 3 7 21 1 2 1
 3 7 21 2 1 1
 3 7 21 3 2 1
 3 7 21 4 1 1
 3 7 22 1 1 1
 3 7 22 2 1 1
 3 7 22 3 1 1
 3 7 22 4 1 1
 3 7 23 1 2 1
 3 7 23 2 1 1
 3 7 23 3 1 1
 3 7 23 4 2 1
 3 7 24 1 1 1
 3 7 24 2 1 1
 3 7 24 3 2 1
 3 7 24 4 1 1
 3 7 25 1 1 1
 3 7 25 2 1 1
 3 7 25 3 1 1
 3 7 25 4 1 1
 3 7 26 1 1 1
 3 7 26 2 2 1
 3 7 26 3 1 1
 3 7 26 4 2 1
 3 7 27 1 1 1
 3 7 27 2 1 1
 3 7 27 3 2 1
 3 7 27 4 2 1
 3 7 28 1 1 1
 3 7 28 2 1 1
 3 7 28 3 2 1
 3 7 28 4 1 1
 3 7 29 1 2 1
 3 7 29 2 1 1
 3 7 29 3 1 1
 3 7 29 4 2 1
 3 7 30 1 2 1
 3 7 30 2 2 1
 3 7 30 3 1 1
 3 7 30 4 2 1
 3 7 31 1 2 1
 3 7 31 2 2 1
 3 7 31 3 1 1
 3 7 31 4 1 1
 3 7 32 1 1 1
 3 7 32 2 1 1
 3 7 32 3 2 1
 3 7 32 4 1 1
 3 8 1 1 2 1
 3 8 1 2 1 1
 3 8 1 3 2 1
 3 8 1 4 1 1
 3 8 2 1 1 1
 3 8 2 2 1 1
 3 8 2 3 1 1
 3 8 2 4 1 1
 3 8 3 1 1 1
 3 8 3 2 1 1
 3 8 3 3 1 1
 3 8 3 4 2 1
 3 8 4 1 1 1
 3 8 4 2 1 1
 3 8 4 3 1 1
 3 8 4 4 1 1
 3 8 5 1 1 1
 3 8 5 2 2 1
 3 8 5 3 2 1
 3 8 5 4 1 1
 3 8 6 1 1 1
 3 8 6 2 1 1
 3 8 6 3 1 1
 3 8 6 4 1 1
 3 8 7 1 1 1
 3 8 7 2 2 1
 3 8 7 3 2 1
 3 8 7 4 1 1
 3 8 8 1 1 1
 3 8 8 2 1 1
 3 8 8 3 1 1
 3 8 8 4 1 1
 3 8 9 1 2 1
 3 8 9 2 1 1
 3 8 9 3 1 1
 3 8 9 4 1 1
 3 8 10 1 1 1
 3 8 10 2 1 1
 3 8 10 3 2 1
 3 8 10 4 1 1
 3 8 11 1 1 1
 3 8 11 2 1 1
 3 8 11 3 1 1
 3 8 11 4 1 1
 3 8 12 1 1 1
 3 8 12 2 2 1
 3 8 12 3 1 1
 3 8 12 4 2 1
 3 8 13 1 1 1
 3 8 13 2 1 1
 3 8 13 3 1 1
 3 8 13 4 1 1
 3 8 14 1 1 1
 3 8 14 2 1 1
 3 8 14 3 1 1
 3 8 14 4 1 1
 3 8 15 1 1 1
 3 8 15 2 2 1
 3 8 15 3 1 1
 3 8 15 4 1 1
 3 8 16 1 2 1
 3 8 16 2 2 1
 3 8 16 3 2 1
 3 8 16 4 2 1
 3 8 17 1 2 1
 3 8 17 2 1 1
 3 8 17 3 2 1
 3 8 17 4 1 1
 3 8 18 1 2 1
 3 8 18 2 1 1
 3 8 18 3 1 1
 3 8 18 4 1 1
 3 8 19 1 1 1
 3 8 19 2 1 1
 3 8 19 3 1 1
 3 8 19 4 1 1
 3 8 20 1 1 1
 3 8 20 2 1 1
 3 8 20 3 2 1
 3 8 20 4 1 1
 3 8 21 1 1 1
 3 8 21 2 1 1
 3 8 21 3 1 1
 3 8 21 4 1 1
 3 8 22 1 1 1
 3 8 22 2 2 1
 3 8 22 3 1 1
 3 8 22 4 1 1
 3 8 23 1 2 1
 3 8 23 2 2 1
 3 8 23 3 2 1
 3 8 23 4 2 1
 3 8 24 1 1 1
 3 8 24 2 1 1
 3 8 24 3 1 1
 3 8 24 4 1 1
 3 8 25 1 1 1
 3 8 25 2 1 1
 3 8 25 3 1 1
 3 8 25 4 1 1
 3 8 26 1 1 1
 3 8 26 2 1 1
 3 8 26 3 2 1
 3 8 26 4 1 1
 3 8 27 1 1 1
 3 8 27 2 2 1
 3 8 27 3 1 1
 3 8 27 4 1 1
 3 8 28 1 1 1
 3 8 28 2 2 1
 3 8 28 3 1 1
 3 8 28 4 1 1
 3 8 29 1 2 1
 3 8 29 2 1 1
 3 8 29 3 1 1
 3 8 29 4 1 1
 3 8 30 1 1 1
 3 8 30 2 2 1
 3 8 30 3 1 1
 3 8 30 4 1 1
 3 8 31 1 1 1
 3 8 31 2 2 1
 3 8 31 3 2 1
 3 8 31 4 1 1
 3 8 32 1 1 1
 3 8 32 2 1 1
 3 8 32 3 2 1
 3 8 32 4 1 1
 3 9 1 1 1 1
 3 9 1 2 1 1
 3 9 1 3 1 1
 3 9 1 4 1 1
 3 9 2 1 1 1
 3 9 2 2 1 1
 3 9 2 3 2 1
 3 9 2 4 1 1
 3 9 3 1 1 1
 3 9 3 2 1 1
 3 9 3 3 1 1
 3 9 3 4 1 1
 3 9 4 1 1 1
 3 9 4 2 1 1
 3 9 4 3 2 1
 3 9 4 4 1 1
 3 9 5 1 1 1
 3 9 5 2 1 1
 3 9 5 3 1 1
 3 9 5 4 2 1
 3 9 6 1 1 1
 3 9 6 2 1 1
 3 9 6 3 1 1
 3 9 6 4 1 1
 3 9 7 1 1 1
 3 9 7 2 2 1
 3 9 7 3 1 1
 3 9 7 4 2 1
 3 9 8 1 1 1
 3 9 8 2 1 1
 3 9 8 3 1 1
 3 9 8 4 1 1
 3 9 9 1 1 1
 3 9 9 2 2 1
 3 9 9 3 1 1
 3 9 9 4 1 1
 3 9 10 1 1 1
 3 9 10 2 1 1
 3 9 10 3 1 1
 3 9 10 4 1 1
 3 9 11 1 1 1
 3 9 11 2 2 1
 3 9 11 3 2 1
 3 9 11 4 1 1
 3 9 12 1 1 1
 3 9 12 2 1 1
 3 9 12 3 1 1
 3 9 12 4 1 1
 3 9 13 1 1 1
 3 9 13 2 1 1
 3 9 13 3 2 1
 3 9 13 4 1 1
 3 9 14 1 1 1
 3 9 14 2 1 1
 3 9 14 3 1 1
 3 9 14 4 1 1
 3 9 15 1 2 1
 3 9 15 2 2 1
 3 9 15 3 2 1
 3 9 15 4 2 1
 3 9 16 1 1 1
 3 9 16 2 1 1
 3 9 16 3 2 1
 3 9 16 4 2 1
 3 9 17 1 1 1
 3 9 17 2 1 1
 3 9 17 3 2 1
 3 9 17 4 2 1
 3 9 18 1 2 1
 3 9 18 2 1 1
 3 9 18 3 1 1
 3 9 18 4 1 1
 3 9 19 1 1 1
 3 9 19 2 1 1
 3 9 19 3 2 1
 3 9 19 4 1 1
 3 9 20 1 1 1
 3 9 20 2 1 1
 3 9 20 3 1 1
 3 9 20 4 2 1
 3 9 21 1 1 1
 3 9 21 2 2 1
 3 9 21 3 1 1
 3 9 21 4 1 1
 3 9 22 1 1 1
 3 9 22 2 2 1
 3 9 22 3 2 1
 3 9 22 4 1 1
 3 9 23 1 2 1
 3 9 23 2 1 1
 3 9 23 3 1 1
 3 9 23 4 2 1
 3 9 24 1 1 1
 3 9 24 2 1 1
 3 9 24 3 1 1
 3 9 24 4 1 1
 3 9 25 1 1 1
 3 9 25 2 1 1
 3 9 25 3 2 1
 3 9 25 4 2 1
 3 9 26 1 1 1
 3 9 26 2 2 1
 3 9 26 3 2 1
 3 9 26 4 1 1
 3 9 27 1 1 1
 3 9 27 2 1 1
 3 9 27 3 1 1
 3 9 27 4 1 1
 3 9 28 1 2 1
 3 9 28 2 1 1
 3 9 28 3 1 1
 3 9 28 4 1 1
 3 9 29 1 2 1
 3 9 29 2 1 1
 3 9 29 3 2 1
 3 9 29 4 1 1
 3 9 30 1 1 1
 3 9 30 2 2 1
 3 9 30 3 1 1
 3 9 30 4 2 1
 3 9 31 1 2 1
 3 9 31 2 2 1
 3 9 31 3 1 1
 3 9 31 4 1 1
 3 9 32 1 2 1
 3 9 32 2 1 1
 3 9 32 3 2 1
 3 9 32 4 1 1
 3 10 1 1 1 1
 3 10 1 2 1 1
 3 10 1 3 1 1
 3 10 1 4 2 1
 3 10 2 1 2 1
 3 10 2 2 2 1
 3 10 2 3 2 1
 3 10 2 4 1 1
 3 10 3 1 2 1
 3 10 3 2 1 1
 3 10 3 3 2 1
 3 10 3 4 1 1
 3 10 4 1 1 1
 3 10 4 2 1 1
 3 10 4 3 1 1
 3 10 4 4 1 1
 3 10 5 1 1 1
 3 10 5 2 2 1
 3 10 5 3 1 1
 3 10 5 4 1 1
 3 10 6 1 2 1
 3 10 6 2 1 1
 3 10 6 3 1 1
 3 10 6 4 1 1
 3 10 7 1 1 1
 3 10 7 2 1 1
 3 10 7 3 1 1
 3 10 7 4 1 1
 3 10 8 1 1 1
 3 10 8 2 1 1
 3 10 8 3 2 1
 3 10 8 4 1 1
 3 10 9 1 1 1
 3 10 9 2 2 1
 3 10 9 3 2 1
 3 10 9 4 1 1
 3 10 10 1 1 1
 3 10 10 2 1 1
 3 10 10 3 1 1
 3 10 10 4 2 1
 3 10 11 1 2 1
 3 10 11 2 1 1
 3 10 11 3 2 1
 3 10 11 4 1 1
 3 10 12 1 2 1
 3 10 12 2 2 1
 3 10 12 3 1 1
 3 10 12 4 2 1
 3 10 13 1 1 1
 3 10 13 2 1 1
 3 10 13 3 1 1
 3 10 13 4 1 1
 3 10 14 1 2 1
 3 10 14 2 1 1
 3 10 14 3 1 1
 3 10 14 4 1 1
 3 10 15 1 2 1
 3 10 15 2 1 1
 3 10 15 3 1 1
 3 10 15 4 1 1
 3 10 16 1 1 1
 3 10 16 2 2 1
 3 10 16 3 2 1
 3 10 16 4 2 1
 3 10 17 1 1 1
 3 10 17 2 1 1
 3 10 17 3 1 1
 3 10 17 4 1 1
 3 10 18 1 1 1
 3 10 18 2 1 1
 3 10 18 3 1 1
 3 10 18 4 1 1
 3 10 19 1 2 1
 3 10 19 2 1 1
 3 10 19 3 2 1
 3 10 19 4 1 1
 3 10 20 1 1 1
 3 10 20 2 2 1
 3 10 20 3 1 1
 3 10 20 4 2 1
 3 10 21 1 1 1
 3 10 21 2 1 1
 3 10 21 3 1 1
 3 10 21 4 1 1
 3 10 22 1 2 1
 3 10 22 2 1 1
 3 10 22 3 1 1
 3 10 22 4 2 1
 3 10 23 1 1 1
 3 10 23 2 1 1
 3 10 23 3 1 1
 3 10 23 4 1 1
 3 10 24 1 1 1
 3 10 24 2 1 1
 3 10 24 3 1 1
 3 10 24 4 2 1
 3 10 25 1 1 1
 3 10 25 2 2 1
 3 10 25 3 1 1
 3 10 25 4 2 1
 3 10 26 1 2 1
 3 10 26 2 1 1
 3 10 26 3 1 1
 3 10 26 4 1 1
 3 10 27 1 2 1
 3 10 27 2 1 1
 3 10 27 3 1 1
 3 10 27 4 1 1
 3 10 28 1 1 1
 3 10 28 2 1 1
 3 10 28 3 1 1
 3 10 28 4 1 1
 3 10 29 1 1 1
 3 10 29 2 1 1
 3 10 29 3 1 1
 3 10 29 4 1 1
 3 10 30 1 2 1
 3 10 30 2 1 1
 3 10 30 3 1 1
 3 10 30 4 2 1
 3 10 31 1 2 1
 3 10 31 2 1 1
 3 10 31 3 1 1
 3 10 31 4 1 1
 3 10 32 1 1 1
 3 10 32 2 2 1
 3 10 32 3 2 1
 3 10 32 4 1 1
 3 11 1 1 1 1
 3 11 1 2 1 1
 3 11 1 3 2 1
 3 11 1 4 2 1
 3 11 2 1 1 1
 3 11 2 2 2 1
 3 11 2 3 2 1
 3 11 2 4 2 1
 3 11 3 1 1 1
 3 11 3 2 1 1
 3 11 3 3 1 1
 3 11 3 4 2 1
 3 11 4 1 1 1
 3 11 4 2 1 1
 3 11 4 3 2 1
 3 11 4 4 2 1
 3 11 5 1 2 1
 3 11 5 2 2 1
 3 11 5 3 1 1
 3 11 5 4 1 1
 3 11 6 1 1 1
 3 11 6 2 1 1
 3 11 6 3 1 1
 3 11 6 4 1 1
 3 11 7 1 1 1
 3 11 7 2 1 1
 3 11 7 3 2 1
 3 11 7 4 1 1
 3 11 8 1 2 1
 3 11 8 2 1 1
 3 11 8 3 2 1
 3 11 8 4 1 1
 3 11 9 1 2 1
 3 11 9 2 1 1
 3 11 9 3 1 1
 3 11 9 4 1 1
 3 11 10 1 1 1
 3 11 10 2 2 1
 3 11 10 3 1 1
 3 11 10 4 2 1
 3 11 11 1 1 1
 3 11 11 2 1 1
 3 11 11 3 1 1
 3 11 11 4 1 1
 3 11 12 1 1 1
 3 11 12 2 2 1
 3 11 12 3 1 1
 3 11 12 4 1 1
 3 11 13 1 2 1
 3 11 13 2 2 1
 3 11 13 3 1 1
 3 11 13 4 1 1
 3 11 14 1 1 1
 3 11 14 2 1 1
 3 11 14 3 1 1
 3 11 14 4 1 1
 3 11 15 1 1 1
 3 11 15 2 1 1
 3 11 15 3 1 1
 3 11 15 4 1 1
 3 11 16 1 1 1
 3 11 16 2 1 1
 3 11 16 3 1 1
 3 11 16 4 1 1
 3 11 17 1 2 1
 3 11 17 2 2 1
 3 11 17 3 2 1
 3 11 17 4 1 1
 3 11 18 1 2 1
 3 11 18 2 1 1
 3 11 18 3 1 1
 3 11 18 4 2 1
 3 11 19 1 1 1
 3 11 19 2 1 1
 3 11 19 3 1 1
 3 11 19 4 1 1
 3 11 20 1 1 1
 3 11 20 2 1 1
 3 11 20 3 1 1
 3 11 20 4 1 1
 3 11 21 1 2 1
 3 11 21 2 1 1
 3 11 21 3 2 1
 3 11 21 4 1 1
 3 11 22 1 1 1
 3 11 22 2 1 1
 3 11 22 3 2 1
 3 11 22 4 1 1
 3 11 23 1 1 1
 3 11 23 2 1 1
 3 11 23 3 1 1
 3 11 23 4 1 1
 3 11 24 1 1 1
 3 11 24 2 2 1
 3 11 24 3 2 1
 3 11 24 4 2 1
 3 11 25 1 2 1
 3 11 25 2 2 1
 3 11 25 3 2 1
 3 11 25 4 1 1
 3 11 26 1 1 1
 3 11 26 2 2 1
 3 11 26 3 1 1
 3 11 26 4 1 1
 3 11 27 1 1 1
 3 11 27 2 1 1
 3 11 27 3 1 1
 3 11 27 4 2 1
 3 11 28 1 1 1
 3 11 28 2 1 1
 3 11 28 3 1 1
 3 11 28 4 1 1
 3 11 29 1 1 1
 3 11 29 2 1 1
 3 11 29 3 1 1
 3 11 29 4 1 1
 3 11 30 1 1 1
 3 11 30 2 1 1
 3 11 30 3 1 1
 3 11 30 4 2 1
 3 11 31 1 2 1
 3 11 31 2 1 1
 3 11 31 3 1 1
 3 11 31 4 1 1
 3 11 32 1 2 1
 3 11 32 2 2 1
 3 11 32 3 1 1
 3 11 32 4 1 1
 3 12 1 1 2 1
 3 12 1 2 2 1
 3 12 1 3 2 1
 3 12 1 4 1 1
 3 12 2 1 1 1
 3 12 2 2 2 1
 3 12 2 3 1 1
 3 12 2 4 2 1
 3 12 3 1 2 1
 3 12 3 2 1 1
 3 12 3 3 2 1
 3 12 3 4 1 1
 3 12 4 1 1 1
 3 12 4 2 1 1
 3 12 4 3 2 1
 3 12 4 4 1 1
 3 12 5 1 1 1
 3 12 5 2 1 1
 3 12 5 3 2 1
 3 12 5 4 2 1
 3 12 6 1 2 1
 3 12 6 2 2 1
 3 12 6 3 1 1
 3 12 6 4 1 1
 3 12 7 1 2 1
 3 12 7 2 1 1
 3 12 7 3 1 1
 3 12 7 4 1 1
 3 12 8 1 1 1
 3 12 8 2 1 1
 3 12 8 3 1 1
 3 12 8 4 1 1
 3 12 9 1 1 1
 3 12 9 2 1 1
 3 12 9 3 2 1
 3 12 9 4 1 1
 3 12 10 1 2 1
 3 12 10 2 2 1
 3 12 10 3 1 1
 3 12 10 4 1 1
 3 12 11 1 2 1
 3 12 11 2 2 1
 3 12 11 3 1 1
 3 12 11 4 1 1
 3 12 12 1 1 1
 3 12 12 2 2 1
 3 12 12 3 1 1
 3 12 12 4 1 1
 3 12 13 1 1 1
 3 12 13 2 1 1
 3 12 13 3 1 1
 3 12 13 4 2 1
 3 12 14 1 1 1
 3 12 14 2 1 1
 3 12 14 3 1 1
 3 12 14 4 1 1
 3 12 15 1 2 1
 3 12 15 2 1 1
 3 12 15 3 2 1
 3 12 15 4 1 1
 3 12 16 1 1 1
 3 12 16 2 1 1
 3 12 16 3 1 1
 3 12 16 4 1 1
 3 12 17 1 1 1
 3 12 17 2 1 1
 3 12 17 3 1 1
 3 12 17 4 1 1
 3 12 18 1 1 1
 3 12 18 2 1 1
 3 12 18 3 1 1
 3 12 18 4 1 1
 3 12 19 1 1 1
 3 12 19 2 1 1
 3 12 19 3 1 1
 3 12 19 4 1 1
 3 12 20 1 2 1
 3 12 20 2 1 1
 3 12 20 3 1 1
 3 12 20 4 1 1
 3 12 21 1 1 1
 3 12 21 2 1 1
 3 12 21 3 1 1
 3 12 21 4 1 1
 3 12 22 1 1 1
 3 12 22 2 1 1
 3 12 22 3 1 1
 3 12 22 4 1 1
 3 12 23 1 1 1
 3 12 23 2 1 1
 3 12 23 3 2 1
 3 12 23 4 1 1
 3 12 24 1 2 1
 3 12 24 2 1 1
 3 12 24 3 1 1
 3 12 24 4 1 1
 3 12 25 1 2 1
 3 12 25 2 1 1
 3 12 25 3 2 1
 3 12 25 4 1 1
 3 12 26 1 1 1
 3 12 26 2 2 1
 3 12 26 3 2 1
 3 12 26 4 1 1
 3 12 27 1 2 1
 3 12 27 2 2 1
 3 12 27 3 1 1
 3 12 27 4 2 1
 3 12 28 1 2 1
 3 12 28 2 2 1
 3 12 28 3 1 1
 3 12 28 4 1 1
 3 12 29 1 1 1
 3 12 29 2 1 1
 3 12 29 3 1 1
 3 12 29 4 1 1
 3 12 30 1 2 1
 3 12 30 2 1 1
 3 12 30 3 1 1
 3 12 30 4 1 1
 3 12 31 1 2 1
 3 12 31 2 1 1
 3 12 31 3 1 1
 3 12 31 4 1 1
 3 12 32 1 2 1
 3 12 32 2 2 1
 3 12 32 3 1 1
 3 12 32 4 1 1
 3 13 1 1 2 1
 3 13 1 2 1 1
 3 13 1 3 2 1
 3 13 1 4 1 1
 3 13 2 1 2 1
 3 13 2 2 1 1
 3 13 2 3 2 1
 3 13 2 4 1 1
 3 13 3 1 2 1
 3 13 3 2 1 1
 3 13 3 3 1 1
 3 13 3 4 1 1
 3 13 4 1 2 1
 3 13 4 2 1 1
 3 13 4 3 1 1
 3 13 4 4 2 1
 3 13 5 1 2 1
 3 13 5 2 1 1
 3 13 5 3 1 1
 3 13 5 4 1 1
 3 13 6 1 1 1
 3 13 6 2 1 1
 3 13 6 3 2 1
 3 13 6 4 2 1
 3 13 7 1 2 1
 3 13 7 2 1 1
 3 13 7 3 1 1
 3 13 7 4 2 1
 3 13 8 1 1 1
 3 13 8 2 1 1
 3 13 8 3 1 1
 3 13 8 4 2 1
 3 13 9 1 1 1
 3 13 9 2 1 1
 3 13 9 3 2 1
 3 13 9 4 1 1
 3 13 10 1 2 1
 3 13 10 2 2 1
 3 13 10 3 2 1
 3 13 10 4 1 1
 3 13 11 1 1 1
 3 13 11 2 2 1
 3 13 11 3 1 1
 3 13 11 4 1 1
 3 13 12 1 2 1
 3 13 12 2 1 1
 3 13 12 3 1 1
 3 13 12 4 1 1
 3 13 13 1 1 1
 3 13 13 2 1 1
 3 13 13 3 1 1
 3 13 13 4 1 1
 3 13 14 1 2 1
 3 13 14 2 2 1
 3 13 14 3 1 1
 3 13 14 4 1 1
 3 13 15 1 1 1
 3 13 15 2 1 1
 3 13 15 3 2 1
 3 13 15 4 1 1
 3 13 16 1 1 1
 3 13 16 2 1 1
 3 13 16 3 1 1
 3 13 16 4 1 1
 3 13 17 1 1 1
 3 13 17 2 1 1
 3 13 17 3 2 1
 3 13 17 4 1 1
 3 13 18 1 1 1
 3 13 18 2 1 1
 3 13 18 3 1 1
 3 13 18 4 1 1
 3 13 19 1 1 1
 3 13 19 2 1 1
 3 13 19 3 2 1
 3 13 19 4 1 1
 3 13 20 1 1 1
 3 13 20 2 2 1
 3 13 20 3 2 1
 3 13 20 4 2 1
 3 13 21 1 1 1
 3 13 21 2 2 1
 3 13 21 3 1 1
 3 13 21 4 2 1
 3 13 22 1 1 1
 3 13 22 2 1 1
 3 13 22 3 1 1
 3 13 22 4 1 1
 3 13 23 1 1 1
 3 13 23 2 2 1
 3 13 23 3 1 1
 3 13 23 4 2 1
 3 13 24 1 1 1
 3 13 24 2 1 1
 3 13 24 3 1 1
 3 13 24 4 1 1
 3 13 25 1 1 1
 3 13 25 2 1 1
 3 13 25 3 1 1
 3 13 25 4 2 1
 3 13 26 1 1 1
 3 13 26 2 2 1
 3 13 26 3 2 1
 3 13 26 4 2 1
 3 13 27 1 1 1
 3 13 27 2 2 1
 3 13 27 3 1 1
 3 13 27 4 1 1
 3 13 28 1 2 1
 3 13 28 2 2 1
 3 13 28 3 1 1
 3 13 28 4 2 1
 3 13 29 1 2 1
 3 13 29 2 1 1
 3 13 29 3 1 1
 3 13 29 4 1 1
 3 13 30 1 1 1
 3 13 30 2 2 1
 3 13 30 3 1 1
 3 13 30 4 1 1
 3 13 31 1 2 1
 3 13 31 2 1 1
 3 13 31 3 1 1
 3 13 31 4 1 1
 3 13 32 1 1 1
 3 13 32 2 1 1
 3 13 32 3 1 1
 3 13 32 4 2 1
 3 14 1 1 1 1
 3 14 1 2 2 1
 3 14 1 3 1 1
 3 14 1 4 2 1
 3 14 2 1 1 1
 3 14 2 2 2 1
 3 14 2 3 2 1
 3 14 2 4 1 1
 3 14 3 1 1 1
 3 14 3 2 1 1
 3 14 3 3 2 1
 3 14 3 4 1 1
 3 14 4 1 1 1
 3 14 4 2 1 1
 3 14 4 3 1 1
 3 14 4 4 2 1
 3 14 5 1 1 1
 3 14 5 2 2 1
 3 14 5 3 2 1
 3 14 5 4 2 1
 3 14 6 1 1 1
 3 14 6 2 1 1
 3 14 6 3 1 1
 3 14 6 4 1 1
 3 14 7 1 1 1
 3 14 7 2 1 1
 3 14 7 3 2 1
 3 14 7 4 1 1
 3 14 8 1 1 1
 3 14 8 2 2 1
 3 14 8 3 2 1
 3 14 8 4 1 1
 3 14 9 1 1 1
 3 14 9 2 1 1
 3 14 9 3 2 1
 3 14 9 4 1 1
 3 14 10 1 1 1
 3 14 10 2 1 1
 3 14 10 3 2 1
 3 14 10 4 2 1
 3 14 11 1 1 1
 3 14 11 2 1 1
 3 14 11 3 1 1
 3 14 11 4 2 1
 3 14 12 1 1 1
 3 14 12 2 1 1
 3 14 12 3 2 1
 3 14 12 4 1 1
 3 14 13 1 1 1
 3 14 13 2 1 1
 3 14 13 3 1 1
 3 14 13 4 2 1
 3 14 14 1 2 1
 3 14 14 2 1 1
 3 14 14 3 1 1
 3 14 14 4 1 1
 3 14 15 1 2 1
 3 14 15 2 1 1
 3 14 15 3 1 1
 3 14 15 4 1 1
 3 14 16 1 1 1
 3 14 16 2 1 1
 3 14 16 3 1 1
 3 14 16 4 1 1
 3 14 17 1 1 1
 3 14 17 2 2 1
 3 14 17 3 1 1
 3 14 17 4 1 1
 3 14 18 1 2 1
 3 14 18 2 2 1
 3 14 18 3 1 1
 3 14 18 4 2 1
 3 14 19 1 1 1
 3 14 19 2 2 1
 3 14 19 3 2 1
 3 14 19 4 1 1
 3 14 20 1 1 1
 3 14 20 2 2 1
 3 14 20 3 1 1
 3 14 20 4 1 1
 3 14 21 1 1 1
 3 14 21 2 2 1
 3 14 21 3 1 1
 3 14 21 4 2 1
 3 14 22 1 1 1
 3 14 22 2 1 1
 3 14 22 3 2 1
 3 14 22 4 2 1
 3 14 23 1 1 1
 3 14 23 2 2 1
 3 14 23 3 2 1
 3 14 23 4 1 1
 3 14 24 1 2 1
 3 14 24 2 2 1
 3 14 24 3 1 1
 3 14 24 4 1 1
 3 14 25 1 1 1
 3 14 25 2 1 1
 3 14 25 3 2 1
 3 14 25 4 2 1
 3 14 26 1 1 1
 3 14 26 2 2 1
 3 14 26 3 1 1
 3 14 26 4 2 1
 3 14 27 1 1 1
 3 14 27 2 1 1
 3 14 27 3 1 1
 3 14 27 4 2 1
 3 14 28 1 1 1
 3 14 28 2 1 1
 3 14 28 3 1 1
 3 14 28 4 2 1
 3 14 29 1 1 1
 3 14 29 2 2 1
 3 14 29 3 1 1
 3 14 29 4 1 1
 3 14 30 1 1 1
 3 14 30 2 2 1
 3 14 30 3 1 1
 3 14 30 4 1 1
 3 14 31 1 2 1
 3 14 31 2 1 1
 3 14 31 3 1 1
 3 14 31 4 1 1
 3 14 32 1 2 1
 3 14 32 2 1 1
 3 14 32 3 1 1
 3 14 32 4 1 1
 3 15 1 1 2 1
 3 15 1 2 1 1
 3 15 1 3 1 1
 3 15 1 4 1 1
 3 15 2 1 2 1
 3 15 2 2 2 1
 3 15 2 3 1 1
 3 15 2 4 1 1
 3 15 3 1 1 1
 3 15 3 2 2 1
 3 15 3 3 1 1
 3 15 3 4 1 1
 3 15 4 1 1 1
 3 15 4 2 2 1
 3 15 4 3 1 1
 3 15 4 4 2 1
 3 15 5 1 1 1
 3 15 5 2 1 1
 3 15 5 3 2 1
 3 15 5 4 1 1
 3 15 6 1 1 1
 3 15 6 2 2 1
 3 15 6 3 1 1
 3 15 6 4 1 1
 3 15 7 1 2 1
 3 15 7 2 1 1
 3 15 7 3 1 1
 3 15 7 4 1 1
 3 15 8 1 1 1
 3 15 8 2 1 1
 3 15 8 3 2 1
 3 15 8 4 1 1
 3 15 9 1 2 1
 3 15 9 2 1 1
 3 15 9 3 1 1
 3 15 9 4 2 1
 3 15 10 1 1 1
 3 15 10 2 2 1
 3 15 10 3 1 1
 3 15 10 4 2 1
 3 15 11 1 1 1
 3 15 11 2 1 1
 3 15 11 3 1 1
 3 15 11 4 2 1
 3 15 12 1 1 1
 3 15 12 2 1 1
 3 15 12 3 2 1
 3 15 12 4 1 1
 3 15 13 1 2 1
 3 15 13 2 2 1
 3 15 13 3 1 1
 3 15 13 4 1 1
 3 15 14 1 2 1
 3 15 14 2 2 1
 3 15 14 3 1 1
 3 15 14 4 1 1
 3 15 15 1 1 1
 3 15 15 2 1 1
 3 15 15 3 2 1
 3 15 15 4 2 1
 3 15 16 1 2 1
 3 15 16 2 2 1
 3 15 16 3 2 1
 3 15 16 4 1 1
 3 15 17 1 1 1
 3 15 17 2 2 1
 3 15 17 3 2 1
 3 15 17 4 2 1
 3 15 18 1 1 1
 3 15 18 2 1 1
 3 15 18 3 2 1
 3 15 18 4 1 1
 3 15 19 1 1 1
 3 15 19 2 2 1
 3 15 19 3 1 1
 3 15 19 4 1 1
 3 15 20 1 1 1
 3 15 20 2 1 1
 3 15 20 3 2 1
 3 15 20 4 1 1
 3 15 21 1 2 1
 3 15 21 2 1 1
 3 15 21 3 1 1
 3 15 21 4 1 1
 3 15 22 1 1 1
 3 15 22 2 2 1
 3 15 22 3 1 1
 3 15 22 4 2 1
 3 15 23 1 2 1
 3 15 23 2 2 1
 3 15 23 3 1 1
 3 15 23 4 1 1
 3 15 24 1 1 1
 3 15 24 2 1 1
 3 15 24 3 1 1
 3 15 24 4 2 1
 3 15 25 1 1 1
 3 15 25 2 1 1
 3 15 25 3 1 1
 3 15 25 4 1 1
 3 15 26 1 1 1
 3 15 26 2 2 1
 3 15 26 3 2 1
 3 15 26 4 1 1
 3 15 27 1 1 1
 3 15 27 2 1 1
 3 15 27 3 1 1
 3 15 27 4 1 1
 3 15 28 1 1 1
 3 15 28 2 1 1
 3 15 28 3 1 1
 3 15 28 4 2 1
 3 15 29 1 1 1
 3 15 29 2 2 1
 3 15 29 3 1 1
 3 15 29 4 2 1
 3 15 30 1 1 1
 3 15 30 2 2 1
 3 15 30 3 1 1
 3 15 30 4 1 1
 3 15 31 1 1 1
 3 15 31 2 2 1
 3 15 31 3 1 1
 3 15 31 4 1 1
 3 15 32 1 1 1
 3 15 32 2 1 1
 3 15 32 3 1 1
 3 15 32 4 1 1
 3 16 1 1 2 1
 3 16 1 2 1 1
 3 16 1 3 1 1
 3 16 1 4 2 1
 3 16 2 1 1 1
 3 16 2 2 1 1
 3 16 2 3 2 1
 3 16 2 4 1 1
 3 16 3 1 1 1
 3 16 3 2 1 1
 3 16 3 3 1 1
 3 16 3 4 1 1
 3 16 4 1 1 1
 3 16 4 2 1 1
 3 16 4 3 2 1
 3 16 4 4 1 1
 3 16 5 1 1 1
 3 16 5 2 1 1
 3 16 5 3 1 1
 3 16 5 4 1 1
 3 16 6 1 1 1
 3 16 6 2 1 1
 3 16 6 3 2 1
 3 16 6 4 1 1
 3 16 7 1 2 1
 3 16 7 2 2 1
 3 16 7 3 1 1
 3 16 7 4 2 1
 3 16 8 1 1 1
 3 16 8 2 2 1
 3 16 8 3 1 1
 3 16 8 4 2 1
 3 16 9 1 1 1
 3 16 9 2 2 1
 3 16 9 3 1 1
 3 16 9 4 2 1
 3 16 10 1 1 1
 3 16 10 2 2 1
 3 16 10 3 1 1
 3 16 10 4 2 1
 3 16 11 1 1 1
 3 16 11 2 2 1
 3 16 11 3 2 1
 3 16 11 4 1 1
 3 16 12 1 1 1
 3 16 12 2 2 1
 3 16 12 3 2 1
 3 16 12 4 1 1
 3 16 13 1 2 1
 3 16 13 2 1 1
 3 16 13 3 1 1
 3 16 13 4 1 1
 3 16 14 1 1 1
 3 16 14 2 2 1
 3 16 14 3 1 1
 3 16 14 4 1 1
 3 16 15 1 1 1
 3 16 15 2 1 1
 3 16 15 3 1 1
 3 16 15 4 2 1
 3 16 16 1 1 1
 3 16 16 2 1 1
 3 16 16 3 1 1
 3 16 16 4 2 1
 3 16 17 1 1 1
 3 16 17 2 1 1
 3 16 17 3 1 1
 3 16 17 4 1 1
 3 16 18 1 1 1
 3 16 18 2 1 1
 3 16 18 3 2 1
 3 16 18 4 2 1
 3 16 19 1 1 1
 3 16 19 2 1 1
 3 16 19 3 1 1
 3 16 19 4 1 1
 3 16 20 1 2 1
 3 16 20 2 1 1
 3 16 20 3 2 1
 3 16 20 4 1 1
 3 16 21 1 2 1
 3 16 21 2 1 1
 3 16 21 3 2 1
 3 16 21 4 1 1
 3 16 22 1 1 1
 3 16 22 2 2 1
 3 16 22 3 1 1
 3 16 22 4 1 1
 3 16 23 1 1 1
 3 16 23 2 2 1
 3 16 23 3 1 1
 3 16 23 4 1 1
 3 16 24 1 1 1
 3 16 24 2 2 1
 3 16 24 3 1 1
 3 16 24 4 2 1
 3 16 25 1 1 1
 3 16 25 2 1 1
 3 16 25 3 1 1
 3 16 25 4 2 1
 3 16 26 1 1 1
 3 16 26 2 1 1
 3 16 26 3 1 1
 3 16 26 4 2 1
 3 16 27 1 2 1
 3 16 27 2 1 1
 3 16 27 3 1 1
 3 16 27 4 1 1
 3 16 28 1 1 1
 3 16 28 2 2 1
 3 16 28 3 1 1
 3 16 28 4 1 1
 3 16 29 1 1 1
 3 16 29 2 1 1
 3 16 29 3 1 1
 3 16 29 4 1 1
 3 16 30 1 1 1
 3 16 30 2 2 1
 3 16 30 3 1 1
 3 16 30 4 2 1
 3 16 31 1 2 1
 3 16 31 2 2 1
 3 16 31 3 2 1
 3 16 31 4 2 1
 3 16 32 1 2 1
 3 16 32 2 1 1
 3 16 32 3 2 1
 3 16 32 4 2 1
 3 17 1 1 1 1
 3 17 1 2 2 1
 3 17 1 3 1 1
 3 17 1 4 1 1
 3 17 2 1 1 1
 3 17 2 2 2 1
 3 17 2 3 2 1
 3 17 2 4 2 1
 3 17 3 1 1 1
 3 17 3 2 1 1
 3 17 3 3 1 1
 3 17 3 4 1 1
 3 17 4 1 1 1
 3 17 4 2 1 1
 3 17 4 3 2 1
 3 17 4 4 1 1
 3 17 5 1 1 1
 3 17 5 2 2 1
 3 17 5 3 2 1
 3 17 5 4 1 1
 3 17 6 1 2 1
 3 17 6 2 1 1
 3 17 6 3 1 1
 3 17 6 4 2 1
 3 17 7 1 1 1
 3 17 7 2 1 1
 3 17 7 3 1 1
 3 17 7 4 1 1
 3 17 8 1 1 1
 3 17 8 2 2 1
 3 17 8 3 1 1
 3 17 8 4 1 1
 3 17 9 1 2 1
 3 17 9 2 2 1
 3 17 9 3 2 1
 3 17 9 4 2 1
 3 17 10 1 1 1
 3 17 10 2 1 1
 3 17 10 3 1 1
 3 17 10 4 1 1
 3 17 11 1 2 1
 3 17 11 2 1 1
 3 17 11 3 2 1
 3 17 11 4 2 1
 3 17 12 1 1 1
 3 17 12 2 2 1
 3 17 12 3 1 1
 3 17 12 4 1 1
 3 17 13 1 1 1
 3 17 13 2 1 1
 3 17 13 3 2 1
 3 17 13 4 1 1
 3 17 14 1 1 1
 3 17 14 2 1 1
 3 17 14 3 2 1
 3 17 14 4 1 1
 3 17 15 1 1 1
 3 17 15 2 1 1
 3 17 15 3 1 1
 3 17 15 4 1 1
 3 17 16 1 2 1
 3 17 16 2 1 1
 3 17 16 3 1 1
 3 17 16 4 1 1
 3 17 17 1 2 1
 3 17 17 2 1 1
 3 17 17 3 2 1
 3 17 17 4 1 1
 3 17 18 1 1 1
 3 17 18 2 1 1
 3 17 18 3 1 1
 3 17 18 4 1 1
 3 17 19 1 1 1
 3 17 19 2 2 1
 3 17 19 3 1 1
 3 17 19 4 1 1
 3 17 20 1 1 1
 3 17 20 2 1 1
 3 17 20 3 1 1
 3 17 20 4 2 1
 3 17 21 1 1 1
 3 17 21 2 2 1
 3 17 21 3 1 1
 3 17 21 4 1 1
 3 17 22 1 1 1
 3 17 22 2 1 1
 3 17 22 3 1 1
 3 17 22 4 1 1
 3 17 23 1 1 1
 3 17 23 2 1 1
 3 17 23 3 1 1
 3 17 23 4 1 1
 3 17 24 1 2 1
 3 17 24 2 2 1
 3 17 24 3 1 1
 3 17 24 4 1 1
 3 17 25 1 2 1
 3 17 25 2 1 1
 3 17 25 3 2 1
 3 17 25 4 1 1
 3 17 26 1 1 1
 3 17 26 2 1 1
 3 17 26 3 1 1
 3 17 26 4 1 1
 3 17 27 1 1 1
 3 17 27 2 1 1
 3 17 27 3 1 1
 3 17 27 4 1 1
 3 17 28 1 2 1
 3 17 28 2 2 1
 3 17 28 3 1 1
 3 17 28 4 2 1
 3 17 29 1 1 1
 3 17 29 2 1 1
 3 17 29 3 1 1
 3 17 29 4 2 1
 3 17 30 1 1 1
 3 17 30 2 1 1
 3 17 30 3 1 1
 3 17 30 4 2 1
 3 17 31 1 1 1
 3 17 31 2 1 1
 3 17 31 3 1 1
 3 17 31 4 2 1
 3 17 32 1 1 1
 3 17 32 2 2 1
 3 17 32 3 2 1
 3 17 32 4 2 1
 3 18 1 1 1 1
 3 18 1 2 1 1
 3 18 1 3 1 1
 3 18 1 4 1 1
 3 18 2 1 1 1
 3 18 2 2 1 1
 3 18 2 3 2 1
 3 18 2 4 2 1
 3 18 3 1 1 1
 3 18 3 2 1 1
 3 18 3 3 1 1
 3 18 3 4 1 1
 3 18 4 1 1 1
 3 18 4 2 1 1
 3 18 4 3 1 1
 3 18 4 4 2 1
 3 18 5 1 1 1
 3 18 5 2 1 1
 3 18 5 3 1 1
 3 18 5 4 2 1
 3 18 6 1 2 1
 3 18 6 2 1 1
 3 18 6 3 2 1
 3 18 6 4 1 1
 3 18 7 1 1 1
 3 18 7 2 1 1
 3 18 7 3 1 1
 3 18 7 4 1 1
 3 18 8 1 1 1
 3 18 8 2 1 1
 3 18 8 3 1 1
 3 18 8 4 1 1
 3 18 9 1 2 1
 3 18 9 2 1 1
 3 18 9 3 1 1
 3 18 9 4 1 1
 3 18 10 1 2 1
 3 18 10 2 2 1
 3 18 10 3 2 1
 3 18 10 4 2 1
 3 18 11 1 1 1
 3 18 11 2 1 1
 3 18 11 3 1 1
 3 18 11 4 1 1
 3 18 12 1 1 1
 3 18 12 2 1 1
 3 18 12 3 1 1
 3 18 12 4 1 1
 3 18 13 1 1 1
 3 18 13 2 1 1
 3 18 13 3 1 1
 3 18 13 4 1 1
 3 18 14 1 2 1
 3 18 14 2 1 1
 3 18 14 3 1 1
 3 18 14 4 1 1
 3 18 15 1 2 1
 3 18 15 2 2 1
 3 18 15 3 1 1
 3 18 15 4 1 1
 3 18 16 1 1 1
 3 18 16 2 1 1
 3 18 16 3 1 1
 3 18 16 4 1 1
 3 18 17 1 1 1
 3 18 17 2 1 1
 3 18 17 3 2 1
 3 18 17 4 1 1
 3 18 18 1 1 1
 3 18 18 2 1 1
 3 18 18 3 1 1
 3 18 18 4 1 1
 3 18 19 1 1 1
 3 18 19 2 2 1
 3 18 19 3 1 1
 3 18 19 4 2 1
 3 18 20 1 1 1
 3 18 20 2 1 1
 3 18 20 3 1 1
 3 18 20 4 2 1
 3 18 21 1 1 1
 3 18 21 2 1 1
 3 18 21 3 1 1
 3 18 21 4 1 1
 3 18 22 1 2 1
 3 18 22 2 1 1
 3 18 22 3 2 1
 3 18 22 4 1 1
 3 18 23 1 1 1
 3 18 23 2 1 1
 3 18 23 3 1 1
 3 18 23 4 1 1
 3 18 24 1 1 1
 3 18 24 2 1 1
 3 18 24 3 1 1
 3 18 24 4 1 1
 3 18 25 1 1 1
 3 18 25 2 2 1
 3 18 25 3 1 1
 3 18 25 4 1 1
 3 18 26 1 1 1
 3 18 26 2 2 1
 3 18 26 3 1 1
 3 18 26 4 1 1
 3 18 27 1 1 1
 3 18 27 2 2 1
 3 18 27 3 1 1
 3 18 27 4 1 1
 3 18 28 1 2 1
 3 18 28 2 2 1
 3 18 28 3 2 1
 3 18 28 4 2 1
 3 18 29 1 1 1
 3 18 29 2 2 1
 3 18 29 3 1 1
 3 18 29 4 1 1
 3 18 30 1 1 1
 3 18 30 2 1 1
 3 18 30 3 2 1
 3 18 30 4 1 1
 3 18 31 1 1 1
 3 18 31 2 1 1
 3 18 31 3 2 1
 3 18 31 4 1 1
 3 18 32 1 2 1
 3 18 32 2 2 1
 3 18 32 3 1 1
 3 18 32 4 2 1
 3 19 1 1 1 1
 3 19 1 2 1 1
 3 19 1 3 2 1
 3 19 1 4 1 1
 3 19 2 1 2 1
 3 19 2 2 2 1
 3 19 2 3 1 1
 3 19 2 4 2 1
 3 19 3 1 1 1
 3 19 3 2 2 1
 3 19 3 3 1 1
 3 19 3 4 1 1
 3 19 4 1 1 1
 3 19 4 2 1 1
 3 19 4 3 1 1
 3 19 4 4 1 1
 3 19 5 1 2 1
 3 19 5 2 1 1
 3 19 5 3 2 1
 3 19 5 4 1 1
 3 19 6 1 1 1
 3 19 6 2 1 1
 3 19 6 3 2 1
 3 19 6 4 1 1
 3 19 7 1 1 1
 3 19 7 2 2 1
 3 19 7 3 2 1
 3 19 7 4 1 1
 3 19 8 1 1 1
 3 19 8 2 2 1
 3 19 8 3 1 1
 3 19 8 4 1 1
 3 19 9 1 1 1
 3 19 9 2 1 1
 3 19 9 3 1 1
 3 19 9 4 1 1
 3 19 10 1 1 1
 3 19 10 2 2 1
 3 19 10 3 1 1
 3 19 10 4 1 1
 3 19 11 1 2 1
 3 19 11 2 1 1
 3 19 11 3 1 1
 3 19 11 4 1 1
 3 19 12 1 2 1
 3 19 12 2 1 1
 3 19 12 3 1 1
 3 19 12 4 2 1
 3 19 13 1 1 1
 3 19 13 2 2 1
 3 19 13 3 2 1
 3 19 13 4 2 1
 3 19 14 1 2 1
 3 19 14 2 1 1
 3 19 14 3 2 1
 3 19 14 4 1 1
 3 19 15 1 1 1
 3 19 15 2 2 1
 3 19 15 3 2 1
 3 19 15 4 1 1
 3 19 16 1 1 1
 3 19 16 2 1 1
 3 19 16 3 2 1
 3 19 16 4 2 1
 3 19 17 1 2 1
 3 19 17 2 1 1
 3 19 17 3 2 1
 3 19 17 4 2 1
 3 19 18 1 1 1
 3 19 18 2 1 1
 3 19 18 3 2 1
 3 19 18 4 1 1
 3 19 19 1 1 1
 3 19 19 2 2 1
 3 19 19 3 2 1
 3 19 19 4 1 1
 3 19 20 1 2 1
 3 19 20 2 1 1
 3 19 20 3 1 1
 3 19 20 4 2 1
 3 19 21 1 2 1
 3 19 21 2 2 1
 3 19 21 3 2 1
 3 19 21 4 2 1
 3 19 22 1 2 1
 3 19 22 2 1 1
 3 19 22 3 1 1
 3 19 22 4 2 1
 3 19 23 1 1 1
 3 19 23 2 1 1
 3 19 23 3 1 1
 3 19 23 4 1 1
 3 19 24 1 1 1
 3 19 24 2 2 1
 3 19 24 3 1 1
 3 19 24 4 1 1
 3 19 25 1 1 1
 3 19 25 2 1 1
 3 19 25 3 1 1
 3 19 25 4 1 1
 3 19 26 1 1 1
 3 19 26 2 2 1
 3 19 26 3 2 1
 3 19 26 4 1 1
 3 19 27 1 1 1
 3 19 27 2 1 1
 3 19 27 3 1 1
 3 19 27 4 2 1
 3 19 28 1 1 1
 3 19 28 2 1 1
 3 19 28 3 1 1
 3 19 28 4 1 1
 3 19 29 1 1 1
 3 19 29 2 2 1
 3 19 29 3 1 1
 3 19 29 4 2 1
 3 19 30 1 2 1
 3 19 30 2 2 1
 3 19 30 3 2 1
 3 19 30 4 1 1
 3 19 31 1 1 1
 3 19 31 2 2 1
 3 19 31 3 2 1
 3 19 31 4 2 1
 3 19 32 1 1 1
 3 19 32 2 1 1
 3 19 32 3 2 1
 3 19 32 4 1 1
 3 20 1 1 2 1
 3 20 1 2 1 1
 3 20 1 3 1 1
 3 20 1 4 1 1
 3 20 2 1 1 1
 3 20 2 2 1 1
 3 20 2 3 1 1
 3 20 2 4 1 1
 3 20 3 1 2 1
 3 20 3 2 1 1
 3 20 3 3 2 1
 3 20 3 4 1 1
 3 20 4 1 1 1
 3 20 4 2 2 1
 3 20 4 3 1 1
 3 20 4 4 1 1
 3 20 5 1 1 1
 3 20 5 2 1 1
 3 20 5 3 2 1
 3 20 5 4 1 1
 3 20 6 1 2 1
 3 20 6 2 1 1
 3 20 6 3 2 1
 3 20 6 4 1 1
 3 20 7 1 1 1
 3 20 7 2 2 1
 3 20 7 3 2 1
 3 20 7 4 1 1
 3 20 8 1 2 1
 3 20 8 2 1 1
 3 20 8 3 1 1
 3 20 8 4 2 1
 3 20 9 1 2 1
 3 20 9 2 1 1
 3 20 9 3 1 1
 3 20 9 4 1 1
 3 20 10 1 1 1
 3 20 10 2 1 1
 3 20 10 3 1 1
 3 20 10 4 2 1
 3 20 11 1 1 1
 3 20 11 2 1 1
 3 20 11 3 1 1
 3 20 11 4 1 1
 3 20 12 1 2 1
 3 20 12 2 1 1
 3 20 12 3 1 1
 3 20 12 4 1 1
 3 20 13 1 1 1
 3 20 13 2 1 1
 3 20 13 3 2 1
 3 20 13 4 2 1
 3 20 14 1 2 1
 3 20 14 2 2 1
 3 20 14 3 2 1
 3 20 14 4 1 1
 3 20 15 1 1 1
 3 20 15 2 1 1
 3 20 15 3 1 1
 3 20 15 4 1 1
 3 20 16 1 1 1
 3 20 16 2 2 1
 3 20 16 3 1 1
 3 20 16 4 1 1
 3 20 17 1 1 1
 3 20 17 2 1 1
 3 20 17 3 1 1
 3 20 17 4 2 1
 3 20 18 1 2 1
 3 20 18 2 2 1
 3 20 18 3 2 1
 3 20 18 4 2 1
 3 20 19 1 1 1
 3 20 19 2 2 1
 3 20 19 3 2 1
 3 20 19 4 1 1
 3 20 20 1 2 1
 3 20 20 2 1 1
 3 20 20 3 2 1
 3 20 20 4 1 1
 3 20 21 1 1 1
 3 20 21 2 1 1
 3 20 21 3 1 1
 3 20 21 4 2 1
 3 20 22 1 2 1
 3 20 22 2 1 1
 3 20 22 3 2 1
 3 20 22 4 1 1
 3 20 23 1 1 1
 3 20 23 2 2 1
 3 20 23 3 2 1
 3 20 23 4 1 1
 3 20 24 1 1 1
 3 20 24 2 2 1
 3 20 24 3 2 1
 3 20 24 4 1 1
 3 20 25 1 1 1
 3 20 25 2 1 1
 3 20 25 3 1 1
 3 20 25 4 2 1
 3 20 26 1 2 1
 3 20 26 2 1 1
 3 20 26 3 2 1
 3 20 26 4 1 1
 3 20 27 1 1 1
 3 20 27 2 1 1
 3 20 27 3 1 1
 3 20 27 4 1 1
 3 20 28 1 1 1
 3 20 28 2 1 1
 3 20 28 3 2 1
 3 20 28 4 2 1
 3 20 29 1 1 1
 3 20 29 2 2 1
 3 20 29 3 1 1
 3 20 29 4 1 1
 3 20 30 1 1 1
 3 20 30 2 2 1
 3 20 30 3 1 1
 3 20 30 4 1 1
 3 20 31 1 1 1
 3 20 31 2 1 1
 3 20 31 3 1 1
 3 20 31 4 1 1
 3 20 32 1 2 1
 3 20 32 2 1 1
 3 20 32 3 1 1
 3 20 32 4 1 1
 3 21 1 1 1 1
 3 21 1 2 2 1
 3 21 1 3 2 1
 3 21 1 4 1 1
 3 21 2 1 1 1
 3 21 2 2 2 1
 3 21 2 3 1 1
 3 21 2 4 1 1
 3 21 3 1 2 1
 3 21 3 2 2 1
 3 21 3 3 2 1
 3 21 3 4 2 1
 3 21 4 1 1 1
 3 21 4 2 1 1
 3 21 4 3 2 1
 3 21 4 4 1 1
 3 21 5 1 1 1
 3 21 5 2 2 1
 3 21 5 3 1 1
 3 21 5 4 1 1
 3 21 6 1 1 1
 3 21 6 2 1 1
 3 21 6 3 1 1
 3 21 6 4 1 1
 3 21 7 1 1 1
 3 21 7 2 1 1
 3 21 7 3 1 1
 3 21 7 4 1 1
 3 21 8 1 1 1
 3 21 8 2 1 1
 3 21 8 3 1 1
 3 21 8 4 1 1
 3 21 9 1 1 1
 3 21 9 2 1 1
 3 21 9 3 1 1
 3 21 9 4 1 1
 3 21 10 1 2 1
 3 21 10 2 1 1
 3 21 10 3 1 1
 3 21 10 4 1 1
 3 21 11 1 2 1
 3 21 11 2 1 1
 3 21 11 3 1 1
 3 21 11 4 2 1
 3 21 12 1 1 1
 3 21 12 2 1 1
 3 21 12 3 1 1
 3 21 12 4 1 1
 3 21 13 1 2 1
 3 21 13 2 1 1
 3 21 13 3 1 1
 3 21 13 4 1 1
 3 21 14 1 1 1
 3 21 14 2 2 1
 3 21 14 3 2 1
 3 21 14 4 2 1
 3 21 15 1 2 1
 3 21 15 2 2 1
 3 21 15 3 2 1
 3 21 15 4 1 1
 3 21 16 1 2 1
 3 21 16 2 2 1
 3 21 16 3 1 1
 3 21 16 4 1 1
 3 21 17 1 2 1
 3 21 17 2 1 1
 3 21 17 3 1 1
 3 21 17 4 1 1
 3 21 18 1 1 1
 3 21 18 2 1 1
 3 21 18 3 1 1
 3 21 18 4 1 1
 3 21 19 1 1 1
 3 21 19 2 1 1
 3 21 19 3 1 1
 3 21 19 4 2 1
 3 21 20 1 1 1
 3 21 20 2 1 1
 3 21 20 3 2 1
 3 21 20 4 2 1
 3 21 21 1 1 1
 3 21 21 2 1 1
 3 21 21 3 2 1
 3 21 21 4 1 1
 3 21 22 1 1 1
 3 21 22 2 1 1
 3 21 22 3 1 1
 3 21 22 4 1 1
 3 21 23 1 1 1
 3 21 23 2 2 1
 3 21 23 3 1 1
 3 21 23 4 2 1
 3 21 24 1 1 1
 3 21 24 2 1 1
 3 21 24 3 1 1
 3 21 24 4 1 1
 3 21 25 1 1 1
 3 21 25 2 1 1
 3 21 25 3 1 1
 3 21 25 4 1 1
 3 21 26 1 1 1
 3 21 26 2 2 1
 3 21 26 3 1 1
 3 21 26 4 2 1
 3 21 27 1 1 1
 3 21 27 2 1 1
 3 21 27 3 1 1
 3 21 27 4 1 1
 3 21 28 1 1 1
 3 21 28 2 2 1
 3 21 28 3 2 1
 3 21 28 4 2 1
 3 21 29 1 2 1
 3 21 29 2 1 1
 3 21 29 3 1 1
 3 21 29 4 2 1
 3 21 30 1 2 1
 3 21 30 2 1 1
 3 21 30 3 1 1
 3 21 30 4 2 1
 3 21 31 1 2 1
 3 21 31 2 1 1
 3 21 31 3 1 1
 3 21 31 4 1 1
 3 21 32 1 1 1
 3 21 32 2 1 1
 3 21 32 3 1 1
 3 21 32 4 1 1
 3 22 1 1 2 1
 3 22 1 2 2 1
 3 22 1 3 2 1
 3 22 1 4 2 1
 3 22 2 1 1 1
 3 22 2 2 2 1
 3 22 2 3 2 1
 3 22 2 4 2 1
 3 22 3 1 1 1
 3 22 3 2 1 1
 3 22 3 3 2 1
 3 22 3 4 1 1
 3 22 4 1 1 1
 3 22 4 2 1 1
 3 22 4 3 1 1
 3 22 4 4 1 1
 3 22 5 1 1 1
 3 22 5 2 1 1
 3 22 5 3 2 1
 3 22 5 4 1 1
 3 22 6 1 1 1
 3 22 6 2 1 1
 3 22 6 3 2 1
 3 22 6 4 1 1
 3 22 7 1 1 1
 3 22 7 2 2 1
 3 22 7 3 2 1
 3 22 7 4 1 1
 3 22 8 1 1 1
 3 22 8 2 1 1
 3 22 8 3 1 1
 3 22 8 4 1 1
 3 22 9 1 1 1
 3 22 9 2 1 1
 3 22 9 3 1 1
 3 22 9 4 1 1
 3 22 10 1 1 1
 3 22 10 2 1 1
 3 22 10 3 1 1
 3 22 10 4 2 1
 3 22 11 1 1 1
 3 22 11 2 2 1
 3 22 11 3 1 1
 3 22 11 4 2 1
 3 22 12 1 1 1
 3 22 12 2 1 1
 3 22 12 3 1 1
 3 22 12 4 1 1
 3 22 13 1 1 1
 3 22 13 2 1 1
 3 22 13 3 1 1
 3 22 13 4 1 1
 3 22 14 1 1 1
 3 22 14 2 1 1
 3 22 14 3 1 1
 3 22 14 4 1 1
 3 22 15 1 1 1
 3 22 15 2 1 1
 3 22 15 3 2 1
 3 22 15 4 2 1
 3 22 16 1 1 1
 3 22 16 2 1 1
 3 22 16 3 2 1
 3 22 16 4 1 1
 3 22 17 1 1 1
 3 22 17 2 1 1
 3 22 17 3 2 1
 3 22 17 4 1 1
 3 22 18 1 2 1
 3 22 18 2 1 1
 3 22 18 3 2 1
 3 22 18 4 1 1
 3 22 19 1 1 1
 3 22 19 2 1 1
 3 22 19 3 1 1
 3 22 19 4 1 1
 3 22 20 1 1 1
 3 22 20 2 1 1
 3 22 20 3 1 1
 3 22 20 4 1 1
 3 22 21 1 2 1
 3 22 21 2 1 1
 3 22 21 3 1 1
 3 22 21 4 1 1
 3 22 22 1 1 1
 3 22 22 2 2 1
 3 22 22 3 1 1
 3 22 22 4 1 1
 3 22 23 1 1 1
 3 22 23 2 1 1
 3 22 23 3 1 1
 3 22 23 4 1 1
 3 22 24 1 2 1
 3 22 24 2 2 1
 3 22 24 3 1 1
 3 22 24 4 1 1
 3 22 25 1 1 1
 3 22 25 2 1 1
 3 22 25 3 1 1
 3 22 25 4 1 1
 3 22 26 1 1 1
 3 22 26 2 1 1
 3 22 26 3 2 1
 3 22 26 4 1 1
 3 22 27 1 1 1
 3 22 27 2 1 1
 3 22 27 3 1 1
 3 22 27 4 2 1
 3 22 28 1 2 1
 3 22 28 2 1 1
 3 22 28 3 1 1
 3 22 28 4 2 1
 3 22 29 1 1 1
 3 22 29 2 1 1
 3 22 29 3 1 1
 3 22 29 4 1 1
 3 22 30 1 1 1
 3 22 30 2 1 1
 3 22 30 3 2 1
 3 22 30 4 1 1
 3 22 31 1 2 1
 3 22 31 2 2 1
 3 22 31 3 1 1
 3 22 31 4 1 1
 3 22 32 1 1 1
 3 22 32 2 1 1
 3 22 32 3 1 1
 3 22 32 4 1 1
 3 23 1 1 1 1
 3 23 1 2 2 1
 3 23 1 3 1 1
 3 23 1 4 1 1
 3 23 2 1 2 1
 3 23 2 2 1 1
 3 23 2 3 2 1
 3 23 2 4 1 1
 3 23 3 1 2 1
 3 23 3 2 1 1
 3 23 3 3 1 1
 3 23 3 4 1 1
 3 23 4 1 1 1
 3 23 4 2 1 1
 3 23 4 3 1 1
 3 23 4 4 1 1
 3 23 5 1 2 1
 3 23 5 2 1 1
 3 23 5 3 1 1
 3 23 5 4 1 1
 3 23 6 1 1 1
 3 23 6 2 1 1
 3 23 6 3 1 1
 3 23 6 4 2 1
 3 23 7 1 2 1
 3 23 7 2 1 1
 3 23 7 3 1 1
 3 23 7 4 1 1
 3 23 8 1 1 1
 3 23 8 2 1 1
 3 23 8 3 1 1
 3 23 8 4 1 1
 3 23 9 1 2 1
 3 23 9 2 2 1
 3 23 9 3 2 1
 3 23 9 4 1 1
 3 23 10 1 1 1
 3 23 10 2 2 1
 3 23 10 3 1 1
 3 23 10 4 2 1
 3 23 11 1 2 1
 3 23 11 2 2 1
 3 23 11 3 2 1
 3 23 11 4 1 1
 3 23 12 1 2 1
 3 23 12 2 1 1
 3 23 12 3 1 1
 3 23 12 4 1 1
 3 23 13 1 1 1
 3 23 13 2 1 1
 3 23 13 3 1 1
 3 23 13 4 2 1
 3 23 14 1 2 1
 3 23 14 2 2 1
 3 23 14 3 1 1
 3 23 14 4 2 1
 3 23 15 1 2 1
 3 23 15 2 1 1
 3 23 15 3 1 1
 3 23 15 4 2 1
 3 23 16 1 2 1
 3 23 16 2 1 1
 3 23 16 3 1 1
 3 23 16 4 1 1
 3 23 17 1 2 1
 3 23 17 2 1 1
 3 23 17 3 1 1
 3 23 17 4 1 1
 3 23 18 1 1 1
 3 23 18 2 1 1
 3 23 18 3 1 1
 3 23 18 4 2 1
 3 23 19 1 1 1
 3 23 19 2 1 1
 3 23 19 3 1 1
 3 23 19 4 1 1
 3 23 20 1 1 1
 3 23 20 2 1 1
 3 23 20 3 2 1
 3 23 20 4 2 1
 3 23 21 1 1 1
 3 23 21 2 1 1
 3 23 21 3 1 1
 3 23 21 4 1 1
 3 23 22 1 1 1
 3 23 22 2 2 1
 3 23 22 3 1 1
 3 23 22 4 2 1
 3 23 23 1 1 1
 3 23 23 2 1 1
 3 23 23 3 1 1
 3 23 23 4 1 1
 3 23 24 1 1 1
 3 23 24 2 1 1
 3 23 24 3 2 1
 3 23 24 4 1 1
 3 23 25 1 2 1
 3 23 25 2 1 1
 3 23 25 3 1 1
 3 23 25 4 1 1
 3 23 26 1 2 1
 3 23 26 2 1 1
 3 23 26 3 1 1
 3 23 26 4 1 1
 3 23 27 1 1 1
 3 23 27 2 1 1
 3 23 27 3 2 1
 3 23 27 4 2 1
 3 23 28 1 1 1
 3 23 28 2 1 1
 3 23 28 3 1 1
 3 23 28 4 2 1
 3 23 29 1 1 1
 3 23 29 2 1 1
 3 23 29 3 1 1
 3 23 29 4 2 1
 3 23 30 1 2 1
 3 23 30 2 2 1
 3 23 30 3 1 1
 3 23 30 4 1 1
 3 23 31 1 2 1
 3 23 31 2 2 1
 3 23 31 3 1 1
 3 23 31 4 2 1
 3 23 32 1 1 1
 3 23 32 2 2 1
 3 23 32 3 2 1
 3 23 32 4 2 1
 3 24 1 1 1 1
 3 24 1 2 1 1
 3 24 1 3 1 1
 3 24 1 4 1 1
 3 24 2 1 1 1
 3 24 2 2 1 1
 3 24 2 3 1 1
 3 24 2 4 1 1
 3 24 3 1 1 1
 3 24 3 2 1 1
 3 24 3 3 1 1
 3 24 3 4 1 1
 3 24 4 1 2 1
 3 24 4 2 1 1
 3 24 4 3 1 1
 3 24 4 4 1 1
 3 24 5 1 2 1
 3 24 5 2 1 1
 3 24 5 3 1 1
 3 24 5 4 1 1
 3 24 6 1 1 1
 3 24 6 2 2 1
 3 24 6 3 1 1
 3 24 6 4 2 1
 3 24 7 1 2 1
 3 24 7 2 1 1
 3 24 7 3 1 1
 3 24 7 4 1 1
 3 24 8 1 2 1
 3 24 8 2 2 1
 3 24 8 3 1 1
 3 24 8 4 2 1
 3 24 9 1 1 1
 3 24 9 2 2 1
 3 24 9 3 1 1
 3 24 9 4 2 1
 3 24 10 1 1 1
 3 24 10 2 2 1
 3 24 10 3 2 1
 3 24 10 4 2 1
 3 24 11 1 2 1
 3 24 11 2 1 1
 3 24 11 3 1 1
 3 24 11 4 1 1
 3 24 12 1 1 1
 3 24 12 2 1 1
 3 24 12 3 1 1
 3 24 12 4 1 1
 3 24 13 1 1 1
 3 24 13 2 2 1
 3 24 13 3 1 1
 3 24 13 4 1 1
 3 24 14 1 1 1
 3 24 14 2 2 1
 3 24 14 3 2 1
 3 24 14 4 1 1
 3 24 15 1 2 1
 3 24 15 2 1 1
 3 24 15 3 1 1
 3 24 15 4 1 1
 3 24 16 1 1 1
 3 24 16 2 1 1
 3 24 16 3 2 1
 3 24 16 4 1 1
 3 24 17 1 2 1
 3 24 17 2 1 1
 3 24 17 3 1 1
 3 24 17 4 2 1
 3 24 18 1 1 1
 3 24 18 2 2 1
 3 24 18 3 2 1
 3 24 18 4 2 1
 3 24 19 1 2 1
 3 24 19 2 2 1
 3 24 19 3 1 1
 3 24 19 4 1 1
 3 24 20 1 1 1
 3 24 20 2 1 1
 3 24 20 3 1 1
 3 24 20 4 1 1
 3 24 21 1 1 1
 3 24 21 2 1 1
 3 24 21 3 1 1
 3 24 21 4 1 1
 3 24 22 1 1 1
 3 24 22 2 1 1
 3 24 22 3 1 1
 3 24 22 4 1 1
 3 24 23 1 2 1
 3 24 23 2 2 1
 3 24 23 3 2 1
 3 24 23 4 1 1
 3 24 24 1 2 1
 3 24 24 2 1 1
 3 24 24 3 1 1
 3 24 24 4 1 1
 3 24 25 1 1 1
 3 24 25 2 1 1
 3 24 25 3 1 1
 3 24 25 4 1 1
 3 24 26 1 1 1
 3 24 26 2 2 1
 3 24 26 3 1 1
 3 24 26 4 1 1
 3 24 27 1 1 1
 3 24 27 2 1 1
 3 24 27 3 1 1
 3 24 27 4 1 1
 3 24 28 1 2 1
 3 24 28 2 2 1
 3 24 28 3 2 1
 3 24 28 4 1 1
 3 24 29 1 1 1
 3 24 29 2 1 1
 3 24 29 3 2 1
 3 24 29 4 1 1
 3 24 30 1 1 1
 3 24 30 2 2 1
 3 24 30 3 2 1
 3 24 30 4 1 1
 3 24 31 1 1 1
 3 24 31 2 1 1
 3 24 31 3 2 1
 3 24 31 4 1 1
 3 24 32 1 1 1
 3 24 32 2 1 1
 3 24 32 3 2 1
 3 24 32 4 2 1
 3 25 1 1 2 1
 3 25 1 2 1 1
 3 25 1 3 1 1
 3 25 1 4 2 1
 3 25 2 1 2 1
 3 25 2 2 1 1
 3 25 2 3 1 1
 3 25 2 4 1 1
 3 25 3 1 1 1
 3 25 3 2 1 1
 3 25 3 3 2 1
 3 25 3 4 2 1
 3 25 4 1 1 1
 3 25 4 2 1 1
 3 25 4 3 1 1
 3 25 4 4 1 1
 3 25 5 1 2 1
 3 25 5 2 1 1
 3 25 5 3 1 1
 3 25 5 4 2 1
 3 25 6 1 2 1
 3 25 6 2 1 1
 3 25 6 3 2 1
 3 25 6 4 1 1
 3 25 7 1 1 1
 3 25 7 2 1 1
 3 25 7 3 1 1
 3 25 7 4 2 1
 3 25 8 1 1 1
 3 25 8 2 2 1
 3 25 8 3 1 1
 3 25 8 4 2 1
 3 25 9 1 2 1
 3 25 9 2 1 1
 3 25 9 3 1 1
 3 25 9 4 2 1
 3 25 10 1 1 1
 3 25 10 2 1 1
 3 25 10 3 2 1
 3 25 10 4 2 1
 3 25 11 1 1 1
 3 25 11 2 2 1
 3 25 11 3 1 1
 3 25 11 4 2 1
 3 25 12 1 2 1
 3 25 12 2 1 1
 3 25 12 3 1 1
 3 25 12 4 1 1
 3 25 13 1 2 1
 3 25 13 2 1 1
 3 25 13 3 1 1
 3 25 13 4 1 1
 3 25 14 1 2 1
 3 25 14 2 2 1
 3 25 14 3 1 1
 3 25 14 4 1 1
 3 25 15 1 1 1
 3 25 15 2 1 1
 3 25 15 3 1 1
 3 25 15 4 1 1
 3 25 16 1 2 1
 3 25 16 2 2 1
 3 25 16 3 1 1
 3 25 16 4 1 1
 3 25 17 1 2 1
 3 25 17 2 2 1
 3 25 17 3 1 1
 3 25 17 4 1 1
 3 25 18 1 1 1
 3 25 18 2 1 1
 3 25 18 3 2 1
 3 25 18 4 1 1
 3 25 19 1 1 1
 3 25 19 2 2 1
 3 25 19 3 1 1
 3 25 19 4 2 1
 3 25 20 1 1 1
 3 25 20 2 2 1
 3 25 20 3 1 1
 3 25 20 4 1 1
 3 25 21 1 2 1
 3 25 21 2 2 1
 3 25 21 3 2 1
 3 25 21 4 2 1
 3 25 22 1 1 1
 3 25 22 2 1 1
 3 25 22 3 1 1
 3 25 22 4 2 1
 3 25 23 1 1 1
 3 25 23 2 1 1
 3 25 23 3 1 1
 3 25 23 4 1 1
 3 25 24 1 1 1
 3 25 24 2 1 1
 3 25 24 3 2 1
 3 25 24 4 1 1
 3 25 25 1 1 1
 3 25 25 2 1 1
 3 25 25 3 2 1
 3 25 25 4 1 1
 3 25 26 1 2 1
 3 25 26 2 2 1
 3 25 26 3 1 1
 3 25 26 4 1 1
 3 25 27 1 1 1
 3 25 27 2 1 1
 3 25 27 3 1 1
 3 25 27 4 1 1
 3 25 28 1 1 1
 3 25 28 2 1 1
 3 25 28 3 1 1
 3 25 28 4 1 1
 3 25 29 1 1 1
 3 25 29 2 1 1
 3 25 29 3 1 1
 3 25 29 4 1 1
 3 25 30 1 1 1
 3 25 30 2 1 1
 3 25 30 3 1 1
 3 25 30 4 1 1
 3 25 31 1 2 1
 3 25 31 2 1 1
 3 25 31 3 1 1
 3 25 31 4 1 1
 3 25 32 1 2 1
 3 25 32 2 1 1
 3 25 32 3 2 1
 3 25 32 4 1 1
 3 26 1 1 1 1
 3 26 1 2 1 1
 3 26 1 3 1 1
 3 26 1 4 2 1
 3 26 2 1 1 1
 3 26 2 2 1 1
 3 26 2 3 1 1
 3 26 2 4 2 1
 3 26 3 1 1 1
 3 26 3 2 1 1
 3 26 3 3 2 1
 3 26 3 4 2 1
 3 26 4 1 1 1
 3 26 4 2 1 1
 3 26 4 3 2 1
 3 26 4 4 2 1
 3 26 5 1 1 1
 3 26 5 2 1 1
 3 26 5 3 1 1
 3 26 5 4 1 1
 3 26 6 1 1 1
 3 26 6 2 1 1
 3 26 6 3 2 1
 3 26 6 4 1 1
 3 26 7 1 1 1
 3 26 7 2 2 1
 3 26 7 3 1 1
 3 26 7 4 1 1
 3 26 8 1 1 1
 3 26 8 2 1 1
 3 26 8 3 2 1
 3 26 8 4 2 1
 3 26 9 1 2 1
 3 26 9 2 1 1
 3 26 9 3 1 1
 3 26 9 4 1 1
 3 26 10 1 1 1
 3 26 10 2 1 1
 3 26 10 3 1 1
 3 26 10 4 1 1
 3 26 11 1 2 1
 3 26 11 2 2 1
 3 26 11 3 2 1
 3 26 11 4 2 1
 3 26 12 1 1 1
 3 26 12 2 2 1
 3 26 12 3 1 1
 3 26 12 4 1 1
 3 26 13 1 1 1
 3 26 13 2 2 1
 3 26 13 3 2 1
 3 26 13 4 1 1
 3 26 14 1 1 1
 3 26 14 2 2 1
 3 26 14 3 2 1
 3 26 14 4 1 1
 3 26 15 1 1 1
 3 26 15 2 1 1
 3 26 15 3 2 1
 3 26 15 4 1 1
 3 26 16 1 1 1
 3 26 16 2 1 1
 3 26 16 3 1 1
 3 26 16 4 2 1
 3 26 17 1 2 1
 3 26 17 2 1 1
 3 26 17 3 2 1
 3 26 17 4 1 1
 3 26 18 1 1 1
 3 26 18 2 1 1
 3 26 18 3 2 1
 3 26 18 4 1 1
 3 26 19 1 1 1
 3 26 19 2 1 1
 3 26 19 3 1 1
 3 26 19 4 2 1
 3 26 20 1 1 1
 3 26 20 2 1 1
 3 26 20 3 2 1
 3 26 20 4 1 1
 3 26 21 1 1 1
 3 26 21 2 2 1
 3 26 21 3 2 1
 3 26 21 4 1 1
 3 26 22 1 2 1
 3 26 22 2 2 1
 3 26 22 3 2 1
 3 26 22 4 1 1
 3 26 23 1 1 1
 3 26 23 2 1 1
 3 26 23 3 1 1
 3 26 23 4 1 1
 3 26 24 1 1 1
 3 26 24 2 1 1
 3 26 24 3 1 1
 3 26 24 4 1 1
 3 26 25 1 1 1
 3 26 25 2 1 1
 3 26 25 3 2 1
 3 26 25 4 1 1
 3 26 26 1 1 1
 3 26 26 2 1 1
 3 26 26 3 2 1
 3 26 26 4 1 1
 3 26 27 1 2 1
 3 26 27 2 2 1
 3 26 27 3 2 1
 3 26 27 4 1 1
 3 26 28 1 1 1
 3 26 28 2 2 1
 3 26 28 3 1 1
 3 26 28 4 1 1
 3 26 29 1 1 1
 3 26 29 2 2 1
 3 26 29 3 1 1
 3 26 29 4 2 1
 3 26 30 1 1 1
 3 26 30 2 2 1
 3 26 30 3 2 1
 3 26 30 4 1 1
 3 26 31 1 1 1
 3 26 31 2 1 1
 3 26 31 3 1 1
 3 26 31 4 2 1
 3 26 32 1 1 1
 3 26 32 2 1 1
 3 26 32 3 1 1
 3 26 32 4 1 1
 3 27 1 1 1 1
 3 27 1 2 1 1
 3 27 1 3 2 1
 3 27 1 4 1 1
 3 27 2 1 2 1
 3 27 2 2 1 1
 3 27 2 3 1 1
 3 27 2 4 2 1
 3 27 3 1 1 1
 3 27 3 2 2 1
 3 27 3 3 2 1
 3 27 3 4 1 1
 3 27 4 1 1 1
 3 27 4 2 1 1
 3 27 4 3 2 1
 3 27 4 4 2 1
 3 27 5 1 1 1
 3 27 5 2 1 1
 3 27 5 3 1 1
 3 27 5 4 2 1
 3 27 6 1 2 1
 3 27 6 2 1 1
 3 27 6 3 1 1
 3 27 6 4 2 1
 3 27 7 1 1 1
 3 27 7 2 1 1
 3 27 7 3 2 1
 3 27 7 4 1 1
 3 27 8 1 2 1
 3 27 8 2 1 1
 3 27 8 3 2 1
 3 27 8 4 1 1
 3 27 9 1 1 1
 3 27 9 2 1 1
 3 27 9 3 2 1
 3 27 9 4 1 1
 3 27 10 1 2 1
 3 27 10 2 1 1
 3 27 10 3 2 1
 3 27 10 4 1 1
 3 27 11 1 1 1
 3 27 11 2 1 1
 3 27 11 3 1 1
 3 27 11 4 2 1
 3 27 12 1 1 1
 3 27 12 2 1 1
 3 27 12 3 1 1
 3 27 12 4 1 1
 3 27 13 1 2 1
 3 27 13 2 1 1
 3 27 13 3 1 1
 3 27 13 4 1 1
 3 27 14 1 1 1
 3 27 14 2 1 1
 3 27 14 3 2 1
 3 27 14 4 2 1
 3 27 15 1 1 1
 3 27 15 2 1 1
 3 27 15 3 1 1
 3 27 15 4 2 1
 3 27 16 1 2 1
 3 27 16 2 1 1
 3 27 16 3 1 1
 3 27 16 4 2 1
 3 27 17 1 1 1
 3 27 17 2 1 1
 3 27 17 3 1 1
 3 27 17 4 1 1
 3 27 18 1 1 1
 3 27 18 2 1 1
 3 27 18 3 2 1
 3 27 18 4 2 1
 3 27 19 1 1 1
 3 27 19 2 1 1
 3 27 19 3 2 1
 3 27 19 4 1 1
 3 27 20 1 1 1
 3 27 20 2 2 1
 3 27 20 3 1 1
 3 27 20 4 1 1
 3 27 21 1 1 1
 3 27 21 2 1 1
 3 27 21 3 1 1
 3 27 21 4 1 1
 3 27 22 1 1 1
 3 27 22 2 2 1
 3 27 22 3 2 1
 3 27 22 4 1 1
 3 27 23 1 2 1
 3 27 23 2 2 1
 3 27 23 3 1 1
 3 27 23 4 2 1
 3 27 24 1 1 1
 3 27 24 2 1 1
 3 27 24 3 1 1
 3 27 24 4 2 1
 3 27 25 1 2 1
 3 27 25 2 1 1
 3 27 25 3 1 1
 3 27 25 4 2 1
 3 27 26 1 1 1
 3 27 26 2 1 1
 3 27 26 3 1 1
 3 27 26 4 1 1
 3 27 27 1 1 1
 3 27 27 2 1 1
 3 27 27 3 1 1
 3 27 27 4 1 1
 3 27 28 1 2 1
 3 27 28 2 1 1
 3 27 28 3 1 1
 3 27 28 4 1 1
 3 27 29 1 1 1
 3 27 29 2 2 1
 3 27 29 3 1 1
 3 27 29 4 1 1
 3 27 30 1 2 1
 3 27 30 2 1 1
 3 27 30 3 1 1
 3 27 30 4 1 1
 3 27 31 1 2 1
 3 27 31 2 2 1
 3 27 31 3 2 1
 3 27 31 4 1 1
 3 27 32 1 1 1
 3 27 32 2 1 1
 3 27 32 3 1 1
 3 27 32 4 2 1
 3 28 1 1 1 1
 3 28 1 2 2 1
 3 28 1 3 1 1
 3 28 1 4 2 1
 3 28 2 1 1 1
 3 28 2 2 2 1
 3 28 2 3 1 1
 3 28 2 4 1 1
 3 28 3 1 1 1
 3 28 3 2 1 1
 3 28 3 3 1 1
 3 28 3 4 1 1
 3 28 4 1 2 1
 3 28 4 2 1 1
 3 28 4 3 1 1
 3 28 4 4 1 1
 3 28 5 1 2 1
 3 28 5 2 1 1
 3 28 5 3 1 1
 3 28 5 4 1 1
 3 28 6 1 1 1
 3 28 6 2 1 1
 3 28 6 3 1 1
 3 28 6 4 1 1
 3 28 7 1 1 1
 3 28 7 2 1 1
 3 28 7 3 1 1
 3 28 7 4 2 1
 3 28 8 1 1 1
 3 28 8 2 1 1
 3 28 8 3 1 1
 3 28 8 4 2 1
 3 28 9 1 1 1
 3 28 9 2 2 1
 3 28 9 3 2 1
 3 28 9 4 2 1
 3 28 10 1 1 1
 3 28 10 2 1 1
 3 28 10 3 2 1
 3 28 10 4 1 1
 3 28 11 1 1 1
 3 28 11 2 2 1
 3 28 11 3 1 1
 3 28 11 4 2 1
 3 28 12 1 2 1
 3 28 12 2 2 1
 3 28 12 3 1 1
 3 28 12 4 1 1
 3 28 13 1 2 1
 3 28 13 2 2 1
 3 28 13 3 1 1
 3 28 13 4 1 1
 3 28 14 1 1 1
 3 28 14 2 1 1
 3 28 14 3 1 1
 3 28 14 4 1 1
 3 28 15 1 2 1
 3 28 15 2 1 1
 3 28 15 3 1 1
 3 28 15 4 2 1
 3 28 16 1 1 1
 3 28 16 2 1 1
 3 28 16 3 2 1
 3 28 16 4 1 1
 3 28 17 1 2 1
 3 28 17 2 2 1
 3 28 17 3 1 1
 3 28 17 4 1 1
 3 28 18 1 2 1
 3 28 18 2 1 1
 3 28 18 3 1 1
 3 28 18 4 1 1
 3 28 19 1 1 1
 3 28 19 2 2 1
 3 28 19 3 1 1
 3 28 19 4 1 1
 3 28 20 1 1 1
 3 28 20 2 2 1
 3 28 20 3 2 1
 3 28 20 4 1 1
 3 28 21 1 1 1
 3 28 21 2 2 1
 3 28 21 3 1 1
 3 28 21 4 1 1
 3 28 22 1 2 1
 3 28 22 2 2 1
 3 28 22 3 1 1
 3 28 22 4 1 1
 3 28 23 1 1 1
 3 28 23 2 1 1
 3 28 23 3 1 1
 3 28 23 4 1 1
 3 28 24 1 1 1
 3 28 24 2 1 1
 3 28 24 3 1 1
 3 28 24 4 2 1
 3 28 25 1 1 1
 3 28 25 2 1 1
 3 28 25 3 1 1
 3 28 25 4 2 1
 3 28 26 1 2 1
 3 28 26 2 1 1
 3 28 26 3 2 1
 3 28 26 4 1 1
 3 28 27 1 1 1
 3 28 27 2 1 1
 3 28 27 3 1 1
 3 28 27 4 2 1
 3 28 28 1 2 1
 3 28 28 2 1 1
 3 28 28 3 1 1
 3 28 28 4 2 1
 3 28 29 1 2 1
 3 28 29 2 1 1
 3 28 29 3 1 1
 3 28 29 4 1 1
 3 28 30 1 1 1
 3 28 30 2 2 1
 3 28 30 3 1 1
 3 28 30 4 1 1
 3 28 31 1 1 1
 3 28 31 2 1 1
 3 28 31 3 1 1
 3 28 31 4 2 1
 3 28 32 1 1 1
 3 28 32 2 2 1
 3 28 32 3 1 1
 3 28 32 4 2 1
 3 29 1 1 1 1
 3 29 1 2 2 1
 3 29 1 3 1 1
 3 29 1 4 1 1
 3 29 2 1 1 1
 3 29 2 2 1 1
 3 29 2 3 1 1
 3 29 2 4 1 1
 3 29 3 1 2 1
 3 29 3 2 1 1
 3 29 3 3 1 1
 3 29 3 4 2 1
 3 29 4 1 1 1
 3 29 4 2 1 1
 3 29 4 3 1 1
 3 29 4 4 1 1
 3 29 5 1 1 1
 3 29 5 2 1 1
 3 29 5 3 1 1
 3 29 5 4 1 1
 3 29 6 1 1 1
 3 29 6 2 2 1
 3 29 6 3 1 1
 3 29 6 4 1 1
 3 29 7 1 1 1
 3 29 7 2 1 1
 3 29 7 3 2 1
 3 29 7 4 1 1
 3 29 8 1 2 1
 3 29 8 2 1 1
 3 29 8 3 2 1
 3 29 8 4 2 1
 3 29 9 1 1 1
 3 29 9 2 1 1
 3 29 9 3 2 1
 3 29 9 4 2 1
 3 29 10 1 1 1
 3 29 10 2 2 1
 3 29 10 3 1 1
 3 29 10 4 1 1
 3 29 11 1 1 1
 3 29 11 2 1 1
 3 29 11 3 1 1
 3 29 11 4 2 1
 3 29 12 1 1 1
 3 29 12 2 1 1
 3 29 12 3 2 1
 3 29 12 4 1 1
 3 29 13 1 1 1
 3 29 13 2 1 1
 3 29 13 3 1 1
 3 29 13 4 2 1
 3 29 14 1 1 1
 3 29 14 2 2 1
 3 29 14 3 2 1
 3 29 14 4 2 1
 3 29 15 1 1 1
 3 29 15 2 1 1
 3 29 15 3 1 1
 3 29 15 4 2 1
 3 29 16 1 1 1
 3 29 16 2 1 1
 3 29 16 3 2 1
 3 29 16 4 1 1
 3 29 17 1 1 1
 3 29 17 2 2 1
 3 29 17 3 2 1
 3 29 17 4 1 1
 3 29 18 1 1 1
 3 29 18 2 1 1
 3 29 18 3 2 1
 3 29 18 4 2 1
 3 29 19 1 1 1
 3 29 19 2 1 1
 3 29 19 3 2 1
 3 29 19 4 2 1
 3 29 20 1 1 1
 3 29 20 2 1 1
 3 29 20 3 2 1
 3 29 20 4 1 1
 3 29 21 1 1 1
 3 29 21 2 2 1
 3 29 21 3 1 1
 3 29 21 4 2 1
 3 29 22 1 1 1
 3 29 22 2 1 1
 3 29 22 3 1 1
 3 29 22 4 1 1
 3 29 23 1 2 1
 3 29 23 2 1 1
 3 29 23 3 1 1
 3 29 23 4 1 1
 3 29 24 1 1 1
 3 29 24 2 1 1
 3 29 24 3 2 1
 3 29 24 4 2 1
 3 29 25 1 2 1
 3 29 25 2 1 1
 3 29 25 3 2 1
 3 29 25 4 2 1
 3 29 26 1 1 1
 3 29 26 2 1 1
 3 29 26 3 1 1
 3 29 26 4 2 1
 3 29 27 1 1 1
 3 29 27 2 1 1
 3 29 27 3 1 1
 3 29 27 4 1 1
 3 29 28 1 2 1
 3 29 28 2 1 1
 3 29 28 3 2 1
 3 29 28 4 1 1
 3 29 29 1 1 1
 3 29 29 2 1 1
 3 29 29 3 1 1
 3 29 29 4 1 1
 3 29 30 1 1 1
 3 29 30 2 2 1
 3 29 30 3 1 1
 3 29 30 4 2 1
 3 29 31 1 1 1
 3 29 31 2 2 1
 3 29 31 3 2 1
 3 29 31 4 1 1
 3 29 32 1 1 1
 3 29 32 2 2 1
 3 29 32 3 1 1
 3 29 32 4 1 1
 3 30 1 1 1 1
 3 30 1 2 1 1
 3 30 1 3 1 1
 3 30 1 4 2 1
 3 30 2 1 1 1
 3 30 2 2 1 1
 3 30 2 3 1 1
 3 30 2 4 2 1
 3 30 3 1 1 1
 3 30 3 2 1 1
 3 30 3 3 1 1
 3 30 3 4 2 1
 3 30 4 1 2 1
 3 30 4 2 1 1
 3 30 4 3 2 1
 3 30 4 4 1 1
 3 30 5 1 2 1
 3 30 5 2 1 1
 3 30 5 3 2 1
 3 30 5 4 1 1
 3 30 6 1 2 1
 3 30 6 2 1 1
 3 30 6 3 2 1
 3 30 6 4 1 1
 3 30 7 1 2 1
 3 30 7 2 1 1
 3 30 7 3 2 1
 3 30 7 4 1 1
 3 30 8 1 1 1
 3 30 8 2 1 1
 3 30 8 3 2 1
 3 30 8 4 1 1
 3 30 9 1 1 1
 3 30 9 2 1 1
 3 30 9 3 1 1
 3 30 9 4 2 1
 3 30 10 1 1 1
 3 30 10 2 1 1
 3 30 10 3 2 1
 3 30 10 4 1 1
 3 30 11 1 2 1
 3 30 11 2 1 1
 3 30 11 3 1 1
 3 30 11 4 2 1
 3 30 12 1 2 1
 3 30 12 2 1 1
 3 30 12 3 2 1
 3 30 12 4 2 1
 3 30 13 1 1 1
 3 30 13 2 1 1
 3 30 13 3 1 1
 3 30 13 4 1 1
 3 30 14 1 2 1
 3 30 14 2 1 1
 3 30 14 3 1 1
 3 30 14 4 1 1
 3 30 15 1 1 1
 3 30 15 2 2 1
 3 30 15 3 1 1
 3 30 15 4 1 1
 3 30 16 1 2 1
 3 30 16 2 1 1
 3 30 16 3 1 1
 3 30 16 4 1 1
 3 30 17 1 2 1
 3 30 17 2 2 1
 3 30 17 3 1 1
 3 30 17 4 1 1
 3 30 18 1 1 1
 3 30 18 2 1 1
 3 30 18 3 1 1
 3 30 18 4 2 1
 3 30 19 1 1 1
 3 30 19 2 1 1
 3 30 19 3 1 1
 3 30 19 4 2 1
 3 30 20 1 2 1
 3 30 20 2 2 1
 3 30 20 3 1 1
 3 30 20 4 2 1
 3 30 21 1 1 1
 3 30 21 2 1 1
 3 30 21 3 1 1
 3 30 21 4 1 1
 3 30 22 1 1 1
 3 30 22 2 1 1
 3 30 22 3 1 1
 3 30 22 4 2 1
 3 30 23 1 1 1
 3 30 23 2 1 1
 3 30 23 3 1 1
 3 30 23 4 1 1
 3 30 24 1 2 1
 3 30 24 2 1 1
 3 30 24 3 1 1
 3 30 24 4 2 1
 3 30 25 1 1 1
 3 30 25 2 2 1
 3 30 25 3 1 1
 3 30 25 4 1 1
 3 30 26 1 1 1
 3 30 26 2 1 1
 3 30 26 3 1 1
 3 30 26 4 1 1
 3 30 27 1 1 1
 3 30 27 2 2 1
 3 30 27 3 1 1
 3 30 27 4 2 1
 3 30 28 1 2 1
 3 30 28 2 1 1
 3 30 28 3 1 1
 3 30 28 4 1 1
 3 30 29 1 1 1
 3 30 29 2 1 1
 3 30 29 3 1 1
 3 30 29 4 2 1
 3 30 30 1 2 1
 3 30 30 2 2 1
 3 30 30 3 2 1
 3 30 30 4 1 1
 3 30 31 1 2 1
 3 30 31 2 1 1
 3 30 31 3 2 1
 3 30 31 4 1 1
 3 30 32 1 1 1
 3 30 32 2 1 1
 3 30 32 3 2 1
 3 30 32 4 1 1
 3 31 1 1 1 1
 3 31 1 2 1 1
 3 31 1 3 2 1
 3 31 1 4 2 1
 3 31 2 1 1 1
 3 31 2 2 1 1
 3 31 2 3 1 1
 3 31 2 4 2 1
 3 31 3 1 1 1
 3 31 3 2 2 1
 3 31 3 3 1 1
 3 31 3 4 1 1
 3 31 4 1 1 1
 3 31 4 2 2 1
 3 31 4 3 1 1
 3 31 4 4 1 1
 3 31 5 1 1 1
 3 31 5 2 2 1
 3 31 5 3 1 1
 3 31 5 4 1 1
 3 31 6 1 1 1
 3 31 6 2 1 1
 3 31 6 3 1 1
 3 31 6 4 2 1
 3 31 7 1 1 1
 3 31 7 2 2 1
 3 31 7 3 1 1
 3 31 7 4 1 1
 3 31 8 1 1 1
 3 31 8 2 1 1
 3 31 8 3 2 1
 3 31 8 4 2 1
 3 31 9 1 2 1
 3 31 9 2 1 1
 3 31 9 3 1 1
 3 31 9 4 1 1
 3 31 10 1 1 1
 3 31 10 2 2 1
 3 31 10 3 1 1
 3 31 10 4 2 1
 3 31 11 1 1 1
 3 31 11 2 1 1
 3 31 11 3 1 1
 3 31 11 4 2 1
 3 31 12 1 2 1
 3 31 12 2 2 1
 3 31 12 3 2 1
 3 31 12 4 2 1
 3 31 13 1 1 1
 3 31 13 2 2 1
 3 31 13 3 1 1
 3 31 13 4 2 1
 3 31 14 1 1 1
 3 31 14 2 2 1
 3 31 14 3 1 1
 3 31 14 4 1 1
 3 31 15 1 1 1
 3 31 15 2 2 1
 3 31 15 3 1 1
 3 31 15 4 1 1
 3 31 16 1 2 1
 3 31 16 2 2 1
 3 31 16 3 2 1
 3 31 16 4 1 1
 3 31 17 1 1 1
 3 31 17 2 1 1
 3 31 17 3 1 1
 3 31 17 4 1 1
 3 31 18 1 1 1
 3 31 18 2 2 1
 3 31 18 3 2 1
 3 31 18 4 2 1
 3 31 19 1 1 1
 3 31 19 2 1 1
 3 31 19 3 1 1
 3 31 19 4 2 1
 3 31 20 1 1 1
 3 31 20 2 1 1
 3 31 20 3 2 1
 3 31 20 4 1 1
 3 31 21 1 2 1
 3 31 21 2 1 1
 3 31 21 3 1 1
 3 31 21 4 1 1
 3 31 22 1 1 1
 3 31 22 2 1 1
 3 31 22 3 1 1
 3 31 22 4 1 1
 3 31 23 1 1 1
 3 31 23 2 1 1
 3 31 23 3 1 1
 3 31 23 4 1 1
 3 31 24 1 2 1
 3 31 24 2 1 1
 3 31 24 3 1 1
 3 31 24 4 1 1
 3 31 25 1 1 1
 3 31 25 2 1 1
 3 31 25 3 2 1
 3 31 25 4 1 1
 3 31 26 1 2 1
 3 31 26 2 1 1
 3 31 26 3 2 1
 3 31 26 4 2 1
 3 31 27 1 1 1
 3 31 27 2 2 1
 3 31 27 3 1 1
 3 31 27 4 1 1
 3 31 28 1 1 1
 3 31 28 2 1 1
 3 31 28 3 2 1
 3 31 28 4 1 1
 3 31 29 1 1 1
 3 31 29 2 1 1
 3 31 29 3 1 1
 3 31 29 4 2 1
 3 31 30 1 1 1
 3 31 30 2 2 1
 3 31 30 3 1 1
 3 31 30 4 2 1
 3 31 31 1 1 1
 3 31 31 2 1 1
 3 31 31 3 1 1
 3 31 31 4 1 1
 3 31 32 1 1 1
 3 31 32 2 1 1
 3 31 32 3 1 1
 3 31 32 4 1 1
 3 32 1 1 2 1
 3 32 1 2 1 1
 3 32 1 3 2 1
 3 32 1 4 2 1
 3 32 2 1 1 1
 3 32 2 2 1 1
 3 32 2 3 2 1
 3 32 2 4 1 1
 3 32 3 1 1 1
 3 32 3 2 1 1
 3 32 3 3 2 1
 3 32 3 4 2 1
 3 32 4 1 1 1
 3 32 4 2 1 1
 3 32 4 3 1 1
 3 32 4 4 1 1
 3 32 5 1 1 1
 3 32 5 2 1 1
 3 32 5 3 1 1
 3 32 5 4 1 1
 3 32 6 1 2 1
 3 32 6 2 1 1
 3 32 6 3 1 1
 3 32 6 4 2 1
 3 32 7 1 1 1
 3 32 7 2 1 1
 3 32 7 3 2 1
 3 32 7 4 1 1
 3 32 8 1 2 1
 3 32 8 2 1 1
 3 32 8 3 2 1
 3 32 8 4 1 1
 3 32 9 1 1 1
 3 32 9 2 2 1
 3 32 9 3 1 1
 3 32 9 4 1 1
 3 32 10 1 1 1
 3 32 10 2 1 1
 3 32 10 3 1 1
 3 32 10 4 1 1
 3 32 11 1 1 1
 3 32 11 2 1 1
 3 32 11 3 1 1
 3 32 11 4 1 1
 3 32 12 1 2 1
 3 32 12 2 1 1
 3 32 12 3 1 1
 3 32 12 4 2 1
 3 32 13 1 1 1
 3 32 13 2 1 1
 3 32 13 3 1 1
 3 32 13 4 1 1
 3 32 14 1 1 1
 3 32 14 2 1 1
 3 32 14 3 1 1
 3 32 14 4 1 1
 3 32 15 1 1 1
 3 32 15 2 1 1
 3 32 15 3 1 1
 3 32 15 4 2 1
 3 32 16 1 2 1
 3 32 16 2 1 1
 3 32 16 3 1 1
 3 32 16 4 2 1
 3 32 17 1 1 1
 3 32 17 2 1 1
 3 32 17 3 1 1
 3 32 17 4 1 1
 3 32 18 1 2 1
 3 32 18 2 1 1
 3 32 18 3 2 1
 3 32 18 4 2 1
 3 32 19 1 2 1
 3 32 19 2 2 1
 3 32 19 3 1 1
 3 32 19 4 1 1
 3 32 20 1 1 1
 3 32 20 2 1 1
 3 32 20 3 1 1
 3 32 20 4 1 1
 3 32 21 1 1 1
 3 32 21 2 1 1
 3 32 21 3 2 1
 3 32 21 4 2 1
 3 32 22 1 1 1
 3 32 22 2 1 1
 3 32 22 3 1 1
 3 32 22 4 1 1
 3 32 23 1 1 1
 3 32 23 2 2 1
 3 32 23 3 2 1
 3 32 23 4 2 1
 3 32 24 1 1 1
 3 32 24 2 1 1
 3 32 24 3 2 1
 3 32 24 4 1 1
 3 32 25 1 2 1
 3 32 25 2 1 1
 3 32 25 3 1 1
 3 32 25 4 1 1
 3 32 26 1 2 1
 3 32 26 2 2 1
 3 32 26 3 2 1
 3 32 26 4 1 1
 3 32 27 1 1 1
 3 32 27 2 1 1
 3 32 27 3 1 1
 3 32 27 4 1 1
 3 32 28 1 1 1
 3 32 28 2 1 1
 3 32 28 3 2 1
 3 32 28 4 1 1
 3 32 29 1 2 1
 3 32 29 2 2 1
 3 32 29 3 1 1
 3 32 29 4 1 1
 3 32 30 1 1 1
 3 32 30 2 1 1
 3 32 30 3 1 1
 3 32 30 4 1 1
 3 32 31 1 1 1
 3 32 31 2 2 1
 3 32 31 3 1 1
 3 32 31 4 1 1
 3 32 32 1 2 1
 3 32 32 2 1 1
 3 32 32 3 2 1
 3 32 32 4 1 1
 4 1 1 1 1 1
 4 1 1 2 1 1
 4 1 1 3 1 1
 4 1 1 4 1 1
 4 1 2 1 1 1
 4 1 2 2 2 1
 4 1 2 3 1 1
 4 1 2 4 2 1
 4 1 3 1 1 1
 4 1 3 2 1 1
 4 1 3 3 1 1
 4 1 3 4 1 1
 4 1 4 1 1 1
 4 1 4 2 1 1
 4 1 4 3 1 1
 4 1 4 4 1 1
 4 1 5 1 1 1
 4 1 5 2 1 1
 4 1 5 3 1 1
 4 1 5 4 2 1
 4 1 6 1 2 1
 4 1 6 2 1 1
 4 1 6 3 1 1
 4 1 6 4 1 1
 4 1 7 1 2 1
 4 1 7 2 1 1
 4 1 7 3 2 1
 4 1 7 4 1 1
 4 1 8 1 2 1
 4 1 8 2 2 1
 4 1 8 3 2 1
 4 1 8 4 2 1
 4 1 9 1 1 1
 4 1 9 2 1 1
 4 1 9 3 2 1
 4 1 9 4 1 1
 4 1 10 1 2 1
 4 1 10 2 1 1
 4 1 10 3 1 1
 4 1 10 4 1 1
 4 1 11 1 1 1
 4 1 11 2 1 1
 4 1 11 3 1 1
 4 1 11 4 1 1
 4 1 12 1 1 1
 4 1 12 2 1 1
 4 1 12 3 2 1
 4 1 12 4 1 1
 4 1 13 1 2 1
 4 1 13 2 1 1
 4 1 13 3 1 1
 4 1 13 4 1 1
 4 1 14 1 2 1
 4 1 14 2 1 1
 4 1 14 3 1 1
 4 1 14 4 1 1
 4 1 15 1 2 1
 4 1 15 2 1 1
 4 1 15 3 1 1
 4 1 15 4 1 1
 4 1 16 1 2 1
 4 1 16 2 2 1
 4 1 16 3 1 1
 4 1 16 4 1 1
 4 1 17 1 1 1
 4 1 17 2 1 1
 4 1 17 3 1 1
 4 1 17 4 2 1
 4 1 18 1 1 1
 4 1 18 2 1 1
 4 1 18 3 1 1
 4 1 18 4 1 1
 4 1 19 1 2 1
 4 1 19 2 2 1
 4 1 19 3 1 1
 4 1 19 4 1 1
 4 1 20 1 2 1
 4 1 20 2 1 1
 4 1 20 3 1 1
 4 1 20 4 2 1
 4 1 21 1 2 1
 4 1 21 2 1 1
 4 1 21 3 2 1
 4 1 21 4 1 1
 4 1 22 1 1 1
 4 1 22 2 1 1
 4 1 22 3 1 1
 4 1 22 4 1 1
 4 1 23 1 1 1
 4 1 23 2 1 1
 4 1 23 3 1 1
 4 1 23 4 1 1
 4 1 24 1 2 1
 4 1 24 2 1 1
 4 1 24 3 2 1
 4 1 24 4 1 1
 4 1 25 1 1 1
 4 1 25 2 1 1
 4 1 25 3 1 1
 4 1 25 4 1 1
 4 1 26 1 1 1
 4 1 26 2 2 1
 4 1 26 3 2 1
 4 1 26 4 2 1
 4 1 27 1 2 1
 4 1 27 2 1 1
 4 1 27 3 2 1
 4 1 27 4 1 1
 4 1 28 1 1 1
 4 1 28 2 1 1
 4 1 28 3 1 1
 4 1 28 4 2 1
 4 1 29 1 1 1
 4 1 29 2 1 1
 4 1 29 3 1 1
 4 1 29 4 2 1
 4 1 30 1 2 1
 4 1 30 2 1 1
 4 1 30 3 1 1
 4 1 30 4 2 1
 4 1 31 1 1 1
 4 1 31 2 1 1
 4 1 31 3 1 1
 4 1 31 4 1 1
 4 1 32 1 1 1
 4 1 32 2 2 1
 4 1 32 3 2 1
 4 1 32 4 2 1
 4 2 1 1 2 1
 4 2 1 2 1 1
 4 2 1 3 1 1
 4 2 1 4 2 1
 4 2 2 1 1 1
 4 2 2 2 1 1
 4 2 2 3 1 1
 4 2 2 4 1 1
 4 2 3 1 1 1
 4 2 3 2 1 1
 4 2 3 3 2 1
 4 2 3 4 2 1
 4 2 4 1 1 1
 4 2 4 2 2 1
 4 2 4 3 1 1
 4 2 4 4 2 1
 4 2 5 1 1 1
 4 2 5 2 1 1
 4 2 5 3 1 1
 4 2 5 4 2 1
 4 2 6 1 2 1
 4 2 6 2 1 1
 4 2 6 3 1 1
 4 2 6 4 1 1
 4 2 7 1 2 1
 4 2 7 2 1 1
 4 2 7 3 1 1
 4 2 7 4 1 1
 4 2 8 1 1 1
 4 2 8 2 2 1
 4 2 8 3 2 1
 4 2 8 4 2 1
 4 2 9 1 1 1
 4 2 9 2 2 1
 4 2 9 3 1 1
 4 2 9 4 2 1
 4 2 10 1 1 1
 4 2 10 2 1 1
 4 2 10 3 1 1
 4 2 10 4 2 1
 4 2 11 1 2 1
 4 2 11 2 1 1
 4 2 11 3 1 1
 4 2 11 4 1 1
 4 2 12 1 1 1
 4 2 12 2 1 1
 4 2 12 3 1 1
 4 2 12 4 1 1
 4 2 13 1 1 1
 4 2 13 2 1 1
 4 2 13 3 2 1
 4 2 13 4 1 1
 4 2 14 1 1 1
 4 2 14 2 2 1
 4 2 14 3 1 1
 4 2 14 4 1 1
 4 2 15 1 1 1
 4 2 15 2 2 1
 4 2 15 3 2 1
 4 2 15 4 1 1
 4 2 16 1 1 1
 4 2 16 2 2 1
 4 2 16 3 2 1
 4 2 16 4 2 1
 4 2 17 1 2 1
 4 2 17 2 1 1
 4 2 17 3 1 1
 4 2 17 4 1 1
 4 2 18 1 1 1
 4 2 18 2 1 1
 4 2 18 3 1 1
 4 2 18 4 2 1
 4 2 19 1 2 1
 4 2 19 2 1 1
 4 2 19 3 1 1
 4 2 19 4 2 1
 4 2 20 1 2 1
 4 2 20 2 2 1
 4 2 20 3 1 1
 4 2 20 4 2 1
 4 2 21 1 1 1
 4 2 21 2 1 1
 4 2 21 3 2 1
 4 2 21 4 2 1
 4 2 22 1 1 1
 4 2 22 2 1 1
 4 2 22 3 1 1
 4 2 22 4 1 1
 4 2 23 1 2 1
 4 2 23 2 2 1
 4 2 23 3 1 1
 4 2 23 4 1 1
 4 2 24 1 1 1
 4 2 24 2 1 1
 4 2 24 3 1 1
 4 2 24 4 1 1
 4 2 25 1 2 1
 4 2 25 2 1 1
 4 2 25 3 2 1
 4 2 25 4 2 1
 4 2 26 1 1 1
 4 2 26 2 1 1
 4 2 26 3 1 1
 4 2 26 4 1 1
 4 2 27 1 1 1
 4 2 27 2 1 1
 4 2 27 3 1 1
 4 2 27 4 1 1
 4 2 28 1 1 1
 4 2 28 2 1 1
 4 2 28 3 1 1
 4 2 28 4 2 1
 4 2 29 1 1 1
 4 2 29 2 2 1
 4 2 29 3 1 1
 4 2 29 4 1 1
 4 2 30 1 1 1
 4 2 30 2 1 1
 4 2 30 3 1 1
 4 2 30 4 1 1
 4 2 31 1 1 1
 4 2 31 2 1 1
 4 2 31 3 1 1
 4 2 31 4 1 1
 4 2 32 1 2 1
 4 2 32 2 2 1
 4 2 32 3 1 1
 4 2 32 4 2 1
 4 3 1 1 1 1
 4 3 1 2 2 1
 4 3 1 3 2 1
 4 3 1 4 2 1
 4 3 2 1 1 1
 4 3 2 2 1 1
 4 3 2 3 1 1
 4 3 2 4 2 1
 4 3 3 1 1 1
 4 3 3 2 1 1
 4 3 3 3 1 1
 4 3 3 4 1 1
 4 3 4 1 1 1
 4 3 4 2 1 1
 4 3 4 3 1 1
 4 3 4 4 2 1
 4 3 5 1 1 1
 4 3 5 2 1 1
 4 3 5 3 2 1
 4 3 5 4 1 1
 4 3 6 1 2 1
 4 3 6 2 1 1
 4 3 6 3 1 1
 4 3 6 4 1 1
 4 3 7 1 1 1
 4 3 7 2 2 1
 4 3 7 3 2 1
 4 3 7 4 1 1
 4 3 8 1 1 1
 4 3 8 2 1 1
 4 3 8 3 1 1
 4 3 8 4 1 1
 4 3 9 1 1 1
 4 3 9 2 1 1
 4 3 9 3 2 1
 4 3 9 4 1 1
 4 3 10 1 2 1
 4 3 10 2 1 1
 4 3 10 3 1 1
 4 3 10 4 1 1
 4 3 11 1 2 1
 4 3 11 2 1 1
 4 3 11 3 1 1
 4 3 11 4 2 1
 4 3 12 1 1 1
 4 3 12 2 2 1
 4 3 12 3 1 1
 4 3 12 4 1 1
 4 3 13 1 1 1
 4 3 13 2 2 1
 4 3 13 3 1 1
 4 3 13 4 2 1
 4 3 14 1 1 1
 4 3 14 2 1 1
 4 3 14 3 1 1
 4 3 14 4 1 1
 4 3 15 1 1 1
 4 3 15 2 1 1
 4 3 15 3 1 1
 4 3 15 4 1 1
 4 3 16 1 1 1
 4 3 16 2 2 1
 4 3 16 3 1 1
 4 3 16 4 1 1
 4 3 17 1 1 1
 4 3 17 2 2 1
 4 3 17 3 1 1
 4 3 17 4 1 1
 4 3 18 1 1 1
 4 3 18 2 1 1
 4 3 18 3 1 1
 4 3 18 4 1 1
 4 3 19 1 1 1
 4 3 19 2 1 1
 4 3 19 3 1 1
 4 3 19 4 1 1
 4 3 20 1 2 1
 4 3 20 2 1 1
 4 3 20 3 1 1
 4 3 20 4 2 1
 4 3 21 1 2 1
 4 3 21 2 1 1
 4 3 21 3 1 1
 4 3 21 4 2 1
 4 3 22 1 1 1
 4 3 22 2 1 1
 4 3 22 3 1 1
 4 3 22 4 1 1
 4 3 23 1 2 1
 4 3 23 2 1 1
 4 3 23 3 2 1
 4 3 23 4 1 1
 4 3 24 1 2 1
 4 3 24 2 1 1
 4 3 24 3 1 1
 4 3 24 4 2 1
 4 3 25 1 1 1
 4 3 25 2 1 1
 4 3 25 3 1 1
 4 3 25 4 1 1
 4 3 26 1 2 1
 4 3 26 2 2 1
 4 3 26 3 2 1
 4 3 26 4 1 1
 4 3 27 1 1 1
 4 3 27 2 1 1
 4 3 27 3 1 1
 4 3 27 4 1 1
 4 3 28 1 2 1
 4 3 28 2 1 1
 4 3 28 3 2 1
 4 3 28 4 1 1
 4 3 29 1 2 1
 4 3 29 2 2 1
 4 3 29 3 2 1
 4 3 29 4 2 1
 4 3 30 1 1 1
 4 3 30 2 1 1
 4 3 30 3 2 1
 4 3 30 4 2 1
 4 3 31 1 1 1
 4 3 31 2 1 1
 4 3 31 3 1 1
 4 3 31 4 2 1
 4 3 32 1 2 1
 4 3 32 2 1 1
 4 3 32 3 2 1
 4 3 32 4 1 1
 4 4 1 1 2 1
 4 4 1 2 1 1
 4 4 1 3 1 1
 4 4 1 4 1 1
 4 4 2 1 1 1
 4 4 2 2 1 1
 4 4 2 3 1 1
 4 4 2 4 1 1
 4 4 3 1 1 1
 4 4 3 2 1 1
 4 4 3 3 1 1
 4 4 3 4 2 1
 4 4 4 1 1 1
 4 4 4 2 1 1
 4 4 4 3 2 1
 4 4 4 4 1 1
 4 4 5 1 1 1
 4 4 5 2 1 1
 4 4 5 3 2 1
 4 4 5 4 1 1
 4 4 6 1 1 1
 4 4 6 2 1 1
 4 4 6 3 1 1
 4 4 6 4 1 1
 4 4 7 1 1 1
 4 4 7 2 1 1
 4 4 7 3 1 1
 4 4 7 4 1 1
 4 4 8 1 1 1
 4 4 8 2 2 1
 4 4 8 3 1 1
 4 4 8 4 1 1
 4 4 9 1 1 1
 4 4 9 2 2 1
 4 4 9 3 2 1
 4 4 9 4 1 1
 4 4 10 1 1 1
 4 4 10 2 1 1
 4 4 10 3 1 1
 4 4 10 4 1 1
 4 4 11 1 1 1
 4 4 11 2 2 1
 4 4 11 3 2 1
 4 4 11 4 2 1
 4 4 12 1 1 1
 4 4 12 2 1 1
 4 4 12 3 2 1
 4 4 12 4 1 1
 4 4 13 1 1 1
 4 4 13 2 2 1
 4 4 13 3 1 1
 4 4 13 4 1 1
 4 4 14 1 1 1
 4 4 14 2 1 1
 4 4 14 3 1 1
 4 4 14 4 1 1
 4 4 15 1 1 1
 4 4 15 2 1 1
 4 4 15 3 2 1
 4 4 15 4 1 1
 4 4 16 1 2 1
 4 4 16 2 1 1
 4 4 16 3 2 1
 4 4 16 4 1 1
 4 4 17 1 2 1
 4 4 17 2 1 1
 4 4 17 3 1 1
 4 4 17 4 2 1
 4 4 18 1 2 1
 4 4 18 2 2 1
 4 4 18 3 2 1
 4 4 18 4 1 1
 4 4 19 1 1 1
 4 4 19 2 1 1
 4 4 19 3 1 1
 4 4 19 4 1 1
 4 4 20 1 1 1
 4 4 20 2 1 1
 4 4 20 3 1 1
 4 4 20 4 1 1
 4 4 21 1 2 1
 4 4 21 2 1 1
 4 4 21 3 1 1
 4 4 21 4 1 1
 4 4 22 1 1 1
 4 4 22 2 1 1
 4 4 22 3 1 1
 4 4 22 4 1 1
 4 4 23 1 1 1
 4 4 23 2 1 1
 4 4 23 3 1 1
 4 4 23 4 1 1
 4 4 24 1 1 1
 4 4 24 2 1 1
 4 4 24 3 2 1
 4 4 24 4 1 1
 4 4 25 1 1 1
 4 4 25 2 1 1
 4 4 25 3 1 1
 4 4 25 4 1 1
 4 4 26 1 2 1
 4 4 26 2 1 1
 4 4 26 3 2 1
 4 4 26 4 1 1
 4 4 27 1 1 1
 4 4 27 2 1 1
 4 4 27 3 1 1
 4 4 27 4 1 1
 4 4 28 1 1 1
 4 4 28 2 2 1
 4 4 28 3 1 1
 4 4 28 4 1 1
 4 4 29 1 1 1
 4 4 29 2 1 1
 4 4 29 3 1 1
 4 4 29 4 2 1
 4 4 30 1 1 1
 4 4 30 2 1 1
 4 4 30 3 1 1
 4 4 30 4 1 1
 4 4 31 1 2 1
 4 4 31 2 1 1
 4 4 31 3 2 1
 4 4 31 4 1 1
 4 4 32 1 1 1
 4 4 32 2 2 1
 4 4 32 3 1 1
 4 4 32 4 1 1
 4 5 1 1 1 1
 4 5 1 2 1 1
 4 5 1 3 2 1
 4 5 1 4 1 1
 4 5 2 1 1 1
 4 5 2 2 1 1
 4 5 2 3 1 1
 4 5 2 4 1 1
 4 5 3 1 1 1
 4 5 3 2 1 1
 4 5 3 3 1 1
 4 5 3 4 2 1
 4 5 4 1 1 1
 4 5 4 2 1 1
 4 5 4 3 1 1
 4 5 4 4 2 1
 4 5 5 1 1 1
 4 5 5 2 1 1
 4 5 5 3 1 1
 4 5 5 4 2 1
 4 5 6 1 1 1
 4 5 6 2 2 1
 4 5 6 3 2 1
 4 5 6 4 1 1
 4 5 7 1 2 1
 4 5 7 2 1 1
 4 5 7 3 1 1
 4 5 7 4 1 1
 4 5 8 1 1 1
 4 5 8 2 2 1
 4 5 8 3 2 1
 4 5 8 4 1 1
 4 5 9 1 2 1
 4 5 9 2 2 1
 4 5 9 3 1 1
 4 5 9 4 2 1
 4 5 10 1 1 1
 4 5 10 2 2 1
 4 5 10 3 1 1
 4 5 10 4 2 1
 4 5 11 1 2 1
 4 5 11 2 1 1
 4 5 11 3 2 1
 4 5 11 4 1 1
 4 5 12 1 1 1
 4 5 12 2 1 1
 4 5 12 3 1 1
 4 5 12 4 2 1
 4 5 13 1 1 1
 4 5 13 2 1 1
 4 5 13 3 1 1
 4 5 13 4 1 1
 4 5 14 1 2 1
 4 5 14 2 2 1
 4 5 14 3 1 1
 4 5 14 4 1 1
 4 5 15 1 2 1
 4 5 15 2 2 1
 4 5 15 3 2 1
 4 5 15 4 1 1
 4 5 16 1 1 1
 4 5 16 2 1 1
 4 5 16 3 1 1
 4 5 16 4 1 1
 4 5 17 1 2 1
 4 5 17 2 1 1
 4 5 17 3 2 1
 4 5 17 4 2 1
 4 5 18 1 2 1
 4 5 18 2 1 1
 4 5 18 3 1 1
 4 5 18 4 1 1
 4 5 19 1 1 1
 4 5 19 2 1 1
 4 5 19 3 1 1
 4 5 19 4 1 1
 4 5 20 1 1 1
 4 5 20 2 1 1
 4 5 20 3 1 1
 4 5 20 4 1 1
 4 5 21 1 1 1
 4 5 21 2 2 1
 4 5 21 3 2 1
 4 5 21 4 1 1
 4 5 22 1 1 1
 4 5 22 2 2 1
 4 5 22 3 2 1
 4 5 22 4 1 1
 4 5 23 1 1 1
 4 5 23 2 1 1
 4 5 23 3 1 1
 4 5 23 4 2 1
 4 5 24 1 1 1
 4 5 24 2 2 1
 4 5 24 3 1 1
 4 5 24 4 1 1
 4 5 25 1 1 1
 4 5 25 2 1 1
 4 5 25 3 2 1
 4 5 25 4 1 1
 4 5 26 1 1 1
 4 5 26 2 1 1
 4 5 26 3 2 1
 4 5 26 4 2 1
 4 5 27 1 1 1
 4 5 27 2 1 1
 4 5 27 3 1 1
 4 5 27 4 1 1
 4 5 28 1 1 1
 4 5 28 2 1 1
 4 5 28 3 2 1
 4 5 28 4 2 1
 4 5 29 1 1 1
 4 5 29 2 1 1
 4 5 29 3 2 1
 4 5 29 4 1 1
 4 5 30 1 2 1
 4 5 30 2 2 1
 4 5 30 3 1 1
 4 5 30 4 1 1
 4 5 31 1 1 1
 4 5 31 2 1 1
 4 5 31 3 1 1
 4 5 31 4 1 1
 4 5 32 1 1 1
 4 5 32 2 1 1
 4 5 32 3 2 1
 4 5 32 4 1 1
 4 6 1 1 1 1
 4 6 1 2 2 1
 4 6 1 3 1 1
 4 6 1 4 1 1
 4 6 2 1 2 1
 4 6 2 2 2 1
 4 6 2 3 1 1
 4 6 2 4 2 1
 4 6 3 1 1 1
 4 6 3 2 1 1
 4 6 3 3 1 1
 4 6 3 4 1 1
 4 6 4 1 1 1
 4 6 4 2 1 1
 4 6 4 3 1 1
 4 6 4 4 1 1
 4 6 5 1 1 1
 4 6 5 2 2 1
 4 6 5 3 1 1
 4 6 5 4 2 1
 4 6 6 1 1 1
 4 6 6 2 1 1
 4 6 6 3 2 1
 4 6 6 4 1 1
 4 6 7 1 1 1
 4 6 7 2 1 1
 4 6 7 3 1 1
 4 6 7 4 2 1
 4 6 8 1 1 1
 4 6 8 2 2 1
 4 6 8 3 1 1
 4 6 8 4 1 1
 4 6 9 1 1 1
 4 6 9 2 1 1
 4 6 9 3 2 1
 4 6 9 4 1 1
 4 6 10 1 2 1
 4 6 10 2 1 1
 4 6 10 3 2 1
 4 6 10 4 2 1
 4 6 11 1 1 1
 4 6 11 2 1 1
 4 6 11 3 2 1
 4 6 11 4 1 1
 4 6 12 1 1 1
 4 6 12 2 1 1
 4 6 12 3 1 1
 4 6 12 4 1 1
 4 6 13 1 2 1
 4 6 13 2 1 1
 4 6 13 3 1 1
 4 6 13 4 1 1
 4 6 14 1 1 1
 4 6 14 2 1 1
 4 6 14 3 2 1
 4 6 14 4 2 1
 4 6 15 1 1 1
 4 6 15 2 2 1
 4 6 15 3 1 1
 4 6 15 4 1 1
 4 6 16 1 1 1
 4 6 16 2 1 1
 4 6 16 3 1 1
 4 6 16 4 2 1
 4 6 17 1 1 1
 4 6 17 2 2 1
 4 6 17 3 1 1
 4 6 17 4 1 1
 4 6 18 1 1 1
 4 6 18 2 1 1
 4 6 18 3 1 1
 4 6 18 4 1 1
 4 6 19 1 1 1
 4 6 19 2 2 1
 4 6 19 3 1 1
 4 6 19 4 1 1
 4 6 20 1 1 1
 4 6 20 2 2 1
 4 6 20 3 1 1
 4 6 20 4 1 1
 4 6 21 1 2 1
 4 6 21 2 1 1
 4 6 21 3 1 1
 4 6 21 4 2 1
 4 6 22 1 1 1
 4 6 22 2 1 1
 4 6 22 3 1 1
 4 6 22 4 1 1
 4 6 23 1 1 1
 4 6 23 2 2 1
 4 6 23 3 1 1
 4 6 23 4 1 1
 4 6 24 1 1 1
 4 6 24 2 1 1
 4 6 24 3 1 1
 4 6 24 4 2 1
 4 6 25 1 1 1
 4 6 25 2 1 1
 4 6 25 3 1 1
 4 6 25 4 1 1
 4 6 26 1 1 1
 4 6 26 2 1 1
 4 6 26 3 2 1
 4 6 26 4 2 1
 4 6 27 1 1 1
 4 6 27 2 1 1
 4 6 27 3 2 1
 4 6 27 4 1 1
 4 6 28 1 2 1
 4 6 28 2 2 1
 4 6 28 3 1 1
 4 6 28 4 1 1
 4 6 29 1 2 1
 4 6 29 2 2 1
 4 6 29 3 2 1
 4 6 29 4 1 1
 4 6 30 1 1 1
 4 6 30 2 2 1
 4 6 30 3 2 1
 4 6 30 4 1 1
 4 6 31 1 1 1
 4 6 31 2 2 1
 4 6 31 3 1 1
 4 6 31 4 1 1
 4 6 32 1 2 1
 4 6 32 2 1 1
 4 6 32 3 2 1
 4 6 32 4 1 1
 4 7 1 1 1 1
 4 7 1 2 1 1
 4 7 1 3 2 1
 4 7 1 4 1 1
 4 7 2 1 1 1
 4 7 2 2 1 1
 4 7 2 3 1 1
 4 7 2 4 1 1
 4 7 3 1 1 1
 4 7 3 2 1 1
 4 7 3 3 1 1
 4 7 3 4 1 1
 4 7 4 1 1 1
 4 7 4 2 2 1
 4 7 4 3 1 1
 4 7 4 4 1 1
 4 7 5 1 1 1
 4 7 5 2 1 1
 4 7 5 3 1 1
 4 7 5 4 2 1
 4 7 6 1 1 1
 4 7 6 2 1 1
 4 7 6 3 1 1
 4 7 6 4 2 1
 4 7 7 1 1 1
 4 7 7 2 2 1
 4 7 7 3 1 1
 4 7 7 4 1 1
 4 7 8 1 2 1
 4 7 8 2 2 1
 4 7 8 3 1 1
 4 7 8 4 2 1
 4 7 9 1 1 1
 4 7 9 2 1 1
 4 7 9 3 2 1
 4 7 9 4 1 1
 4 7 10 1 2 1
 4 7 10 2 1 1
 4 7 10 3 1 1
 4 7 10 4 1 1
 4 7 11 1 1 1
 4 7 11 2 1 1
 4 7 11 3 1 1
 4 7 11 4 1 1
 4 7 12 1 2 1
 4 7 12 2 1 1
 4 7 12 3 1 1
 4 7 12 4 2 1
 4 7 13 1 1 1
 4 7 13 2 2 1
 4 7 13 3 1 1
 4 7 13 4 2 1
 4 7 14 1 1 1
 4 7 14 2 1 1
 4 7 14 3 2 1
 4 7 14 4 1 1
 4 7 15 1 1 1
 4 7 15 2 1 1
 4 7 15 3 1 1
 4 7 15 4 1 1
 4 7 16 1 1 1
 4 7 16 2 1 1
 4 7 16 3 2 1
 4 7 16 4 2 1
 4 7 17 1 1 1
 4 7 17 2 2 1
 4 7 17 3 1 1
 4 7 17 4 1 1
 4 7 18 1 1 1
 4 7 18 2 1 1
 4 7 18 3 1 1
 4 7 18 4 1 1
 4 7 19 1 1 1
 4 7 19 2 1 1
 4 7 19 3 1 1
 4 7 19 4 2 1
 4 7 20 1 1 1
 4 7 20 2 1 1
 4 7 20 3 1 1
 4 7 20 4 1 1
 4 7 21 1 1 1
 4 7 21 2 2 1
 4 7 21 3 2 1
 4 7 21 4 2 1
 4 7 22 1 2 1
 4 7 22 2 1 1
 4 7 22 3 2 1
 4 7 22 4 1 1
 4 7 23 1 2 1
 4 7 23 2 1 1
 4 7 23 3 2 1
 4 7 23 4 1 1
 4 7 24 1 1 1
 4 7 24 2 2 1
 4 7 24 3 1 1
 4 7 24 4 1 1
 4 7 25 1 1 1
 4 7 25 2 1 1
 4 7 25 3 1 1
 4 7 25 4 2 1
 4 7 26 1 1 1
 4 7 26 2 1 1
 4 7 26 3 2 1
 4 7 26 4 2 1
 4 7 27 1 1 1
 4 7 27 2 1 1
 4 7 27 3 2 1
 4 7 27 4 1 1
 4 7 28 1 2 1
 4 7 28 2 1 1
 4 7 28 3 2 1
 4 7 28 4 2 1
 4 7 29 1 1 1
 4 7 29 2 1 1
 4 7 29 3 1 1
 4 7 29 4 1 1
 4 7 30 1 1 1
 4 7 30 2 2 1
 4 7 30 3 2 1
 4 7 30 4 1 1
 4 7 31 1 2 1
 4 7 31 2 2 1
 4 7 31 3 2 1
 4 7 31 4 2 1
 4 7 32 1 1 1
 4 7 32 2 2 1
 4 7 32 3 2 1
 4 7 32 4 1 1
 4 8 1 1 2 1
 4 8 1 2 1 1
 4 8 1 3 1 1
 4 8 1 4 1 1
 4 8 2 1 2 1
 4 8 2 2 1 1
 4 8 2 3 1 1
 4 8 2 4 1 1
 4 8 3 1 2 1
 4 8 3 2 1 1
 4 8 3 3 2 1
 4 8 3 4 1 1
 4 8 4 1 2 1
 4 8 4 2 1 1
 4 8 4 3 1 1
 4 8 4 4 2 1
 4 8 5 1 2 1
 4 8 5 2 1 1
 4 8 5 3 1 1
 4 8 5 4 2 1
 4 8 6 1 1 1
 4 8 6 2 1 1
 4 8 6 3 1 1
 4 8 6 4 2 1
 4 8 7 1 1 1
 4 8 7 2 1 1
 4 8 7 3 2 1
 4 8 7 4 2 1
 4 8 8 1 2 1
 4 8 8 2 1 1
 4 8 8 3 2 1
 4 8 8 4 2 1
 4 8 9 1 2 1
 4 8 9 2 1 1
 4 8 9 3 1 1
 4 8 9 4 1 1
 4 8 10 1 2 1
 4 8 10 2 1 1
 4 8 10 3 1 1
 4 8 10 4 2 1
 4 8 11 1 1 1
 4 8 11 2 1 1
 4 8 11 3 2 1
 4 8 11 4 1 1
 4 8 12 1 2 1
 4 8 12 2 1 1
 4 8 12 3 1 1
 4 8 12 4 1 1
 4 8 13 1 2 1
 4 8 13 2 1 1
 4 8 13 3 1 1
 4 8 13 4 1 1
 4 8 14 1 1 1
 4 8 14 2 1 1
 4 8 14 3 1 1
 4 8 14 4 1 1
 4 8 15 1 1 1
 4 8 15 2 1 1
 4 8 15 3 1 1
 4 8 15 4 1 1
 4 8 16 1 1 1
 4 8 16 2 1 1
 4 8 16 3 2 1
 4 8 16 4 2 1
 4 8 17 1 1 1
 4 8 17 2 2 1
 4 8 17 3 2 1
 4 8 17 4 1 1
 4 8 18 1 1 1
 4 8 18 2 1 1
 4 8 18 3 1 1
 4 8 18 4 2 1
 4 8 19 1 1 1
 4 8 19 2 1 1
 4 8 19 3 2 1
 4 8 19 4 2 1
 4 8 20 1 1 1
 4 8 20 2 2 1
 4 8 20 3 2 1
 4 8 20 4 2 1
 4 8 21 1 2 1
 4 8 21 2 1 1
 4 8 21 3 1 1
 4 8 21 4 2 1
 4 8 22 1 1 1
 4 8 22 2 1 1
 4 8 22 3 1 1
 4 8 22 4 1 1
 4 8 23 1 1 1
 4 8 23 2 2 1
 4 8 23 3 1 1
 4 8 23 4 1 1
 4 8 24 1 2 1
 4 8 24 2 2 1
 4 8 24 3 1 1
 4 8 24 4 2 1
 4 8 25 1 2 1
 4 8 25 2 1 1
 4 8 25 3 2 1
 4 8 25 4 2 1
 4 8 26 1 2 1
 4 8 26 2 1 1
 4 8 26 3 2 1
 4 8 26 4 1 1
 4 8 27 1 1 1
 4 8 27 2 1 1
 4 8 27 3 1 1
 4 8 27 4 1 1
 4 8 28 1 1 1
 4 8 28 2 1 1
 4 8 28 3 1 1
 4 8 28 4 1 1
 4 8 29 1 2 1
 4 8 29 2 1 1
 4 8 29 3 2 1
 4 8 29 4 1 1
 4 8 30 1 1 1
 4 8 30 2 2 1
 4 8 30 3 1 1
 4 8 30 4 2 1
 4 8 31 1 1 1
 4 8 31 2 1 1
 4 8 31 3 1 1
 4 8 31 4 1 1
 4 8 32 1 1 1
 4 8 32 2 1 1
 4 8 32 3 1 1
 4 8 32 4 1 1
 4 9 1 1 2 1
 4 9 1 2 1 1
 4 9 1 3 1 1
 4 9 1 4 2 1
 4 9 2 1 1 1
 4 9 2 2 1 1
 4 9 2 3 1 1
 4 9 2 4 1 1
 4 9 3 1 1 1
 4 9 3 2 1 1
 4 9 3 3 1 1
 4 9 3 4 2 1
 4 9 4 1 2 1
 4 9 4 2 1 1
 4 9 4 3 1 1
 4 9 4 4 2 1
 4 9 5 1 2 1
 4 9 5 2 2 1
 4 9 5 3 1 1
 4 9 5 4 1 1
 4 9 6 1 2 1
 4 9 6 2 1 1
 4 9 6 3 1 1
 4 9 6 4 1 1
 4 9 7 1 1 1
 4 9 7 2 2 1
 4 9 7 3 1 1
 4 9 7 4 2 1
 4 9 8 1 1 1
 4 9 8 2 1 1
 4 9 8 3 1 1
 4 9 8 4 1 1
 4 9 9 1 1 1
 4 9 9 2 1 1
 4 9 9 3 2 1
 4 9 9 4 1 1
 4 9 10 1 1 1
 4 9 10 2 1 1
 4 9 10 3 1 1
 4 9 10 4 1 1
 4 9 11 1 2 1
 4 9 11 2 1 1
 4 9 11 3 1 1
 4 9 11 4 1 1
 4 9 12 1 1 1
 4 9 12 2 2 1
 4 9 12 3 1 1
 4 9 12 4 2 1
 4 9 13 1 2 1
 4 9 13 2 1 1
 4 9 13 3 1 1
 4 9 13 4 1 1
 4 9 14 1 1 1
 4 9 14 2 1 1
 4 9 14 3 1 1
 4 9 14 4 2 1
 4 9 15 1 1 1
 4 9 15 2 1 1
 4 9 15 3 1 1
 4 9 15 4 1 1
 4 9 16 1 1 1
 4 9 16 2 2 1
 4 9 16 3 2 1
 4 9 16 4 1 1
 4 9 17 1 1 1
 4 9 17 2 1 1
 4 9 17 3 1 1
 4 9 17 4 2 1
 4 9 18 1 1 1
 4 9 18 2 1 1
 4 9 18 3 2 1
 4 9 18 4 1 1
 4 9 19 1 1 1
 4 9 19 2 2 1
 4 9 19 3 1 1
 4 9 19 4 2 1
 4 9 20 1 2 1
 4 9 20 2 1 1
 4 9 20 3 1 1
 4 9 20 4 1 1
 4 9 21 1 1 1
 4 9 21 2 2 1
 4 9 21 3 1 1
 4 9 21 4 1 1
 4 9 22 1 1 1
 4 9 22 2 1 1
 4 9 22 3 2 1
 4 9 22 4 2 1
 4 9 23 1 1 1
 4 9 23 2 2 1
 4 9 23 3 2 1
 4 9 23 4 1 1
 4 9 24 1 1 1
 4 9 24 2 1 1
 4 9 24 3 1 1
 4 9 24 4 2 1
 4 9 25 1 1 1
 4 9 25 2 1 1
 4 9 25 3 1 1
 4 9 25 4 1 1
 4 9 26 1 2 1
 4 9 26 2 2 1
 4 9 26 3 1 1
 4 9 26 4 1 1
 4 9 27 1 1 1
 4 9 27 2 1 1
 4 9 27 3 2 1
 4 9 27 4 1 1
 4 9 28 1 1 1
 4 9 28 2 1 1
 4 9 28 3 1 1
 4 9 28 4 1 1
 4 9 29 1 2 1
 4 9 29 2 1 1
 4 9 29 3 2 1
 4 9 29 4 1 1
 4 9 30 1 1 1
 4 9 30 2 2 1
 4 9 30 3 2 1
 4 9 30 4 1 1
 4 9 31 1 1 1
 4 9 31 2 1 1
 4 9 31 3 2 1
 4 9 31 4 2 1
 4 9 32 1 1 1
 4 9 32 2 2 1
 4 9 32 3 1 1
 4 9 32 4 1 1
 4 10 1 1 1 1
 4 10 1 2 1 1
 4 10 1 3 1 1
 4 10 1 4 1 1
 4 10 2 1 1 1
 4 10 2 2 1 1
 4 10 2 3 1 1
 4 10 2 4 2 1
 4 10 3 1 2 1
 4 10 3 2 1 1
 4 10 3 3 1 1
 4 10 3 4 2 1
 4 10 4 1 2 1
 4 10 4 2 1 1
 4 10 4 3 1 1
 4 10 4 4 1 1
 4 10 5 1 1 1
 4 10 5 2 1 1
 4 10 5 3 1 1
 4 10 5 4 1 1
 4 10 6 1 1 1
 4 10 6 2 1 1
 4 10 6 3 1 1
 4 10 6 4 1 1
 4 10 7 1 1 1
 4 10 7 2 2 1
 4 10 7 3 2 1
 4 10 7 4 1 1
 4 10 8 1 1 1
 4 10 8 2 2 1
 4 10 8 3 2 1
 4 10 8 4 1 1
 4 10 9 1 2 1
 4 10 9 2 2 1
 4 10 9 3 1 1
 4 10 9 4 2 1
 4 10 10 1 1 1
 4 10 10 2 1 1
 4 10 10 3 2 1
 4 10 10 4 1 1
 4 10 11 1 1 1
 4 10 11 2 1 1
 4 10 11 3 1 1
 4 10 11 4 2 1
 4 10 12 1 1 1
 4 10 12 2 1 1
 4 10 12 3 1 1
 4 10 12 4 2 1
 4 10 13 1 1 1
 4 10 13 2 1 1
 4 10 13 3 1 1
 4 10 13 4 1 1
 4 10 14 1 1 1
 4 10 14 2 2 1
 4 10 14 3 1 1
 4 10 14 4 1 1
 4 10 15 1 1 1
 4 10 15 2 1 1
 4 10 15 3 2 1
 4 10 15 4 1 1
 4 10 16 1 2 1
 4 10 16 2 2 1
 4 10 16 3 1 1
 4 10 16 4 1 1
 4 10 17 1 2 1
 4 10 17 2 2 1
 4 10 17 3 1 1
 4 10 17 4 2 1
 4 10 18 1 2 1
 4 10 18 2 1 1
 4 10 18 3 1 1
 4 10 18 4 1 1
 4 10 19 1 2 1
 4 10 19 2 1 1
 4 10 19 3 2 1
 4 10 19 4 1 1
 4 10 20 1 1 1
 4 10 20 2 1 1
 4 10 20 3 1 1
 4 10 20 4 1 1
 4 10 21 1 1 1
 4 10 21 2 1 1
 4 10 21 3 1 1
 4 10 21 4 1 1
 4 10 22 1 2 1
 4 10 22 2 1 1
 4 10 22 3 1 1
 4 10 22 4 1 1
 4 10 23 1 1 1
 4 10 23 2 1 1
 4 10 23 3 1 1
 4 10 23 4 1 1
 4 10 24 1 2 1
 4 10 24 2 2 1
 4 10 24 3 1 1
 4 10 24 4 1 1
 4 10 25 1 2 1
 4 10 25 2 2 1
 4 10 25 3 2 1
 4 10 25 4 1 1
 4 10 26 1 2 1
 4 10 26 2 1 1
 4 10 26 3 2 1
 4 10 26 4 2 1
 4 10 27 1 1 1
 4 10 27 2 1 1
 4 10 27 3 1 1
 4 10 27 4 2 1
 4 10 28 1 1 1
 4 10 28 2 1 1
 4 10 28 3 1 1
 4 10 28 4 1 1
 4 10 29 1 1 1
 4 10 29 2 1 1
 4 10 29 3 1 1
 4 10 29 4 2 1
 4 10 30 1 1 1
 4 10 30 2 1 1
 4 10 30 3 1 1
 4 10 30 4 1 1
 4 10 31 1 1 1
 4 10 31 2 1 1
 4 10 31 3 2 1
 4 10 31 4 1 1
 4 10 32 1 1 1
 4 10 32 2 1 1
 4 10 32 3 2 1
 4 10 32 4 2 1
 4 11 1 1 1 1
 4 11 1 2 1 1
 4 11 1 3 2 1
 4 11 1 4 2 1
 4 11 2 1 1 1
 4 11 2 2 1 1
 4 11 2 3 1 1
 4 11 2 4 1 1
 4 11 3 1 1 1
 4 11 3 2 1 1
 4 11 3 3 1 1
 4 11 3 4 1 1
 4 11 4 1 1 1
 4 11 4 2 2 1
 4 11 4 3 2 1
 4 11 4 4 2 1
 4 11 5 1 1 1
 4 11 5 2 2 1
 4 11 5 3 1 1
 4 11 5 4 1 1
 4 11 6 1 1 1
 4 11 6 2 1 1
 4 11 6 3 1 1
 4 11 6 4 1 1
 4 11 7 1 2 1
 4 11 7 2 1 1
 4 11 7 3 2 1
 4 11 7 4 1 1
 4 11 8 1 1 1
 4 11 8 2 2 1
 4 11 8 3 1 1
 4 11 8 4 2 1
 4 11 9 1 1 1
 4 11 9 2 2 1
 4 11 9 3 1 1
 4 11 9 4 1 1
 4 11 10 1 1 1
 4 11 10 2 1 1
 4 11 10 3 1 1
 4 11 10 4 1 1
 4 11 11 1 1 1
 4 11 11 2 1 1
 4 11 11 3 1 1
 4 11 11 4 1 1
 4 11 12 1 1 1
 4 11 12 2 1 1
 4 11 12 3 1 1
 4 11 12 4 2 1
 4 11 13 1 1 1
 4 11 13 2 1 1
 4 11 13 3 2 1
 4 11 13 4 1 1
 4 11 14 1 1 1
 4 11 14 2 1 1
 4 11 14 3 1 1
 4 11 14 4 1 1
 4 11 15 1 1 1
 4 11 15 2 1 1
 4 11 15 3 2 1
 4 11 15 4 1 1
 4 11 16 1 1 1
 4 11 16 2 1 1
 4 11 16 3 1 1
 4 11 16 4 1 1
 4 11 17 1 1 1
 4 11 17 2 2 1
 4 11 17 3 1 1
 4 11 17 4 1 1
 4 11 18 1 1 1
 4 11 18 2 2 1
 4 11 18 3 2 1
 4 11 18 4 2 1
 4 11 19 1 1 1
 4 11 19 2 1 1
 4 11 19 3 2 1
 4 11 19 4 1 1
 4 11 20 1 2 1
 4 11 20 2 1 1
 4 11 20 3 1 1
 4 11 20 4 2 1
 4 11 21 1 2 1
 4 11 21 2 1 1
 4 11 21 3 1 1
 4 11 21 4 2 1
 4 11 22 1 2 1
 4 11 22 2 2 1
 4 11 22 3 1 1
 4 11 22 4 2 1
 4 11 23 1 1 1
 4 11 23 2 1 1
 4 11 23 3 2 1
 4 11 23 4 1 1
 4 11 24 1 1 1
 4 11 24 2 1 1
 4 11 24 3 1 1
 4 11 24 4 2 1
 4 11 25 1 1 1
 4 11 25 2 1 1
 4 11 25 3 2 1
 4 11 25 4 1 1
 4 11 26 1 1 1
 4 11 26 2 2 1
 4 11 26 3 1 1
 4 11 26 4 1 1
 4 11 27 1 2 1
 4 11 27 2 1 1
 4 11 27 3 1 1
 4 11 27 4 2 1
 4 11 28 1 1 1
 4 11 28 2 2 1
 4 11 28 3 1 1
 4 11 28 4 1 1
 4 11 29 1 1 1
 4 11 29 2 2 1
 4 11 29 3 1 1
 4 11 29 4 1 1
 4 11 30 1 1 1
 4 11 30 2 2 1
 4 11 30 3 2 1
 4 11 30 4 1 1
 4 11 31 1 1 1
 4 11 31 2 2 1
 4 11 31 3 1 1
 4 11 31 4 1 1
 4 11 32 1 1 1
 4 11 32 2 1 1
 4 11 32 3 2 1
 4 11 32 4 1 1
 4 12 1 1 1 1
 4 12 1 2 1 1
 4 12 1 3 1 1
 4 12 1 4 2 1
 4 12 2 1 1 1
 4 12 2 2 1 1
 4 12 2 3 1 1
 4 12 2 4 1 1
 4 12 3 1 2 1
 4 12 3 2 1 1
 4 12 3 3 1 1
 4 12 3 4 2 1
 4 12 4 1 1 1
 4 12 4 2 2 1
 4 12 4 3 1 1
 4 12 4 4 1 1
 4 12 5 1 1 1
 4 12 5 2 1 1
 4 12 5 3 1 1
 4 12 5 4 1 1
 4 12 6 1 2 1
 4 12 6 2 2 1
 4 12 6 3 1 1
 4 12 6 4 1 1
 4 12 7 1 2 1
 4 12 7 2 1 1
 4 12 7 3 2 1
 4 12 7 4 2 1
 4 12 8 1 1 1
 4 12 8 2 1 1
 4 12 8 3 1 1
 4 12 8 4 1 1
 4 12 9 1 1 1
 4 12 9 2 1 1
 4 12 9 3 1 1
 4 12 9 4 2 1
 4 12 10 1 1 1
 4 12 10 2 1 1
 4 12 10 3 2 1
 4 12 10 4 1 1
 4 12 11 1 1 1
 4 12 11 2 1 1
 4 12 11 3 1 1
 4 12 11 4 1 1
 4 12 12 1 1 1
 4 12 12 2 1 1
 4 12 12 3 1 1
 4 12 12 4 1 1
 4 12 13 1 1 1
 4 12 13 2 1 1
 4 12 13 3 1 1
 4 12 13 4 1 1
 4 12 14 1 1 1
 4 12 14 2 1 1
 4 12 14 3 2 1
 4 12 14 4 2 1
 4 12 15 1 1 1
 4 12 15 2 1 1
 4 12 15 3 1 1
 4 12 15 4 1 1
 4 12 16 1 1 1
 4 12 16 2 2 1
 4 12 16 3 1 1
 4 12 16 4 1 1
 4 12 17 1 1 1
 4 12 17 2 1 1
 4 12 17 3 1 1
 4 12 17 4 1 1
 4 12 18 1 2 1
 4 12 18 2 2 1
 4 12 18 3 1 1
 4 12 18 4 2 1
 4 12 19 1 2 1
 4 12 19 2 1 1
 4 12 19 3 1 1
 4 12 19 4 2 1
 4 12 20 1 1 1
 4 12 20 2 1 1
 4 12 20 3 2 1
 4 12 20 4 1 1
 4 12 21 1 1 1
 4 12 21 2 2 1
 4 12 21 3 1 1
 4 12 21 4 1 1
 4 12 22 1 2 1
 4 12 22 2 1 1
 4 12 22 3 1 1
 4 12 22 4 2 1
 4 12 23 1 2 1
 4 12 23 2 2 1
 4 12 23 3 1 1
 4 12 23 4 2 1
 4 12 24 1 1 1
 4 12 24 2 2 1
 4 12 24 3 1 1
 4 12 24 4 2 1
 4 12 25 1 1 1
 4 12 25 2 2 1
 4 12 25 3 2 1
 4 12 25 4 1 1
 4 12 26 1 1 1
 4 12 26 2 2 1
 4 12 26 3 1 1
 4 12 26 4 2 1
 4 12 27 1 1 1
 4 12 27 2 1 1
 4 12 27 3 1 1
 4 12 27 4 1 1
 4 12 28 1 1 1
 4 12 28 2 2 1
 4 12 28 3 1 1
 4 12 28 4 1 1
 4 12 29 1 1 1
 4 12 29 2 1 1
 4 12 29 3 1 1
 4 12 29 4 2 1
 4 12 30 1 2 1
 4 12 30 2 1 1
 4 12 30 3 1 1
 4 12 30 4 1 1
 4 12 31 1 2 1
 4 12 31 2 1 1
 4 12 31 3 1 1
 4 12 31 4 1 1
 4 12 32 1 1 1
 4 12 32 2 1 1
 4 12 32 3 1 1
 4 12 32 4 2 1
 4 13 1 1 1 1
 4 13 1 2 1 1
 4 13 1 3 1 1
 4 13 1 4 1 1
 4 13 2 1 1 1
 4 13 2 2 1 1
 4 13 2 3 2 1
 4 13 2 4 1 1
 4 13 3 1 2 1
 4 13 3 2 2 1
 4 13 3 3 1 1
 4 13 3 4 1 1
 4 13 4 1 1 1
 4 13 4 2 1 1
 4 13 4 3 2 1
 4 13 4 4 2 1
 4 13 5 1 2 1
 4 13 5 2 1 1
 4 13 5 3 1 1
 4 13 5 4 2 1
 4 13 6 1 2 1
 4 13 6 2 1 1
 4 13 6 3 1 1
 4 13 6 4 1 1
 4 13 7 1 1 1
 4 13 7 2 1 1
 4 13 7 3 1 1
 4 13 7 4 1 1
 4 13 8 1 1 1
 4 13 8 2 1 1
 4 13 8 3 1 1
 4 13 8 4 1 1
 4 13 9 1 1 1
 4 13 9 2 1 1
 4 13 9 3 1 1
 4 13 9 4 1 1
 4 13 10 1 2 1
 4 13 10 2 1 1
 4 13 10 3 1 1
 4 13 10 4 1 1
 4 13 11 1 1 1
 4 13 11 2 1 1
 4 13 11 3 1 1
 4 13 11 4 2 1
 4 13 12 1 1 1
 4 13 12 2 2 1
 4 13 12 3 1 1
 4 13 12 4 1 1
 4 13 13 1 1 1
 4 13 13 2 1 1
 4 13 13 3 2 1
 4 13 13 4 2 1
 4 13 14 1 2 1
 4 13 14 2 2 1
 4 13 14 3 1 1
 4 13 14 4 1 1
 4 13 15 1 1 1
 4 13 15 2 1 1
 4 13 15 3 1 1
 4 13 15 4 2 1
 4 13 16 1 2 1
 4 13 16 2 1 1
 4 13 16 3 1 1
 4 13 16 4 1 1
 4 13 17 1 1 1
 4 13 17 2 1 1
 4 13 17 3 1 1
 4 13 17 4 1 1
 4 13 18 1 1 1
 4 13 18 2 1 1
 4 13 18 3 1 1
 4 13 18 4 1 1
 4 13 19 1 1 1
 4 13 19 2 2 1
 4 13 19 3 1 1
 4 13 19 4 2 1
 4 13 20 1 1 1
 4 13 20 2 1 1
 4 13 20 3 1 1
 4 13 20 4 1 1
 4 13 21 1 1 1
 4 13 21 2 1 1
 4 13 21 3 1 1
 4 13 21 4 1 1
 4 13 22 1 1 1
 4 13 22 2 1 1
 4 13 22 3 1 1
 4 13 22 4 1 1
 4 13 23 1 1 1
 4 13 23 2 1 1
 4 13 23 3 1 1
 4 13 23 4 2 1
 4 13 24 1 1 1
 4 13 24 2 2 1
 4 13 24 3 1 1
 4 13 24 4 1 1
 4 13 25 1 2 1
 4 13 25 2 1 1
 4 13 25 3 1 1
 4 13 25 4 1 1
 4 13 26 1 1 1
 4 13 26 2 1 1
 4 13 26 3 2 1
 4 13 26 4 1 1
 4 13 27 1 2 1
 4 13 27 2 1 1
 4 13 27 3 2 1
 4 13 27 4 1 1
 4 13 28 1 1 1
 4 13 28 2 1 1
 4 13 28 3 1 1
 4 13 28 4 2 1
 4 13 29 1 2 1
 4 13 29 2 2 1
 4 13 29 3 1 1
 4 13 29 4 1 1
 4 13 30 1 1 1
 4 13 30 2 2 1
 4 13 30 3 1 1
 4 13 30 4 1 1
 4 13 31 1 2 1
 4 13 31 2 2 1
 4 13 31 3 1 1
 4 13 31 4 2 1
 4 13 32 1 1 1
 4 13 32 2 1 1
 4 13 32 3 1 1
 4 13 32 4 1 1
 4 14 1 1 1 1
 4 14 1 2 2 1
 4 14 1 3 1 1
 4 14 1 4 1 1
 4 14 2 1 1 1
 4 14 2 2 1 1
 4 14 2 3 1 1
 4 14 2 4 1 1
 4 14 3 1 1 1
 4 14 3 2 2 1
 4 14 3 3 1 1
 4 14 3 4 2 1
 4 14 4 1 2 1
 4 14 4 2 1 1
 4 14 4 3 1 1
 4 14 4 4 2 1
 4 14 5 1 1 1
 4 14 5 2 1 1
 4 14 5 3 1 1
 4 14 5 4 2 1
 4 14 6 1 1 1
 4 14 6 2 1 1
 4 14 6 3 1 1
 4 14 6 4 1 1
 4 14 7 1 2 1
 4 14 7 2 2 1
 4 14 7 3 1 1
 4 14 7 4 2 1
 4 14 8 1 2 1
 4 14 8 2 1 1
 4 14 8 3 1 1
 4 14 8 4 1 1
 4 14 9 1 1 1
 4 14 9 2 1 1
 4 14 9 3 1 1
 4 14 9 4 1 1
 4 14 10 1 1 1
 4 14 10 2 1 1
 4 14 10 3 1 1
 4 14 10 4 1 1
 4 14 11 1 1 1
 4 14 11 2 1 1
 4 14 11 3 1 1
 4 14 11 4 1 1
 4 14 12 1 1 1
 4 14 12 2 1 1
 4 14 12 3 2 1
 4 14 12 4 1 1
 4 14 13 1 2 1
 4 14 13 2 1 1
 4 14 13 3 1 1
 4 14 13 4 1 1
 4 14 14 1 2 1
 4 14 14 2 2 1
 4 14 14 3 2 1
 4 14 14 4 1 1
 4 14 15 1 1 1
 4 14 15 2 1 1
 4 14 15 3 1 1
 4 14 15 4 2 1
 4 14 16 1 1 1
 4 14 16 2 1 1
 4 14 16 3 1 1
 4 14 16 4 2 1
 4 14 17 1 1 1
 4 14 17 2 2 1
 4 14 17 3 1 1
 4 14 17 4 1 1
 4 14 18 1 1 1
 4 14 18 2 1 1
 4 14 18 3 1 1
 4 14 18 4 1 1
 4 14 19 1 2 1
 4 14 19 2 2 1
 4 14 19 3 1 1
 4 14 19 4 1 1
 4 14 20 1 1 1
 4 14 20 2 1 1
 4 14 20 3 1 1
 4 14 20 4 1 1
 4 14 21 1 1 1
 4 14 21 2 1 1
 4 14 21 3 1 1
 4 14 21 4 1 1
 4 14 22 1 1 1
 4 14 22 2 1 1
 4 14 22 3 1 1
 4 14 22 4 1 1
 4 14 23 1 1 1
 4 14 23 2 1 1
 4 14 23 3 1 1
 4 14 23 4 1 1
 4 14 24 1 1 1
 4 14 24 2 1 1
 4 14 24 3 1 1
 4 14 24 4 1 1
 4 14 25 1 1 1
 4 14 25 2 1 1
 4 14 25 3 1 1
 4 14 25 4 1 1
 4 14 26 1 2 1
 4 14 26 2 2 1
 4 14 26 3 1 1
 4 14 26 4 1 1
 4 14 27 1 2 1
 4 14 27 2 1 1
 4 14 27 3 1 1
 4 14 27 4 2 1
 4 14 28 1 1 1
 4 14 28 2 1 1
 4 14 28 3 1 1
 4 14 28 4 1 1
 4 14 29 1 1 1
 4 14 29 2 1 1
 4 14 29 3 1 1
 4 14 29 4 1 1
 4 14 30 1 1 1
 4 14 30 2 1 1
 4 14 30 3 2 1
 4 14 30 4 1 1
 4 14 31 1 1 1
 4 14 31 2 2 1
 4 14 31 3 1 1
 4 14 31 4 2 1
 4 14 32 1 1 1
 4 14 32 2 1 1
 4 14 32 3 2 1
 4 14 32 4 1 1
 4 15 1 1 1 1
 4 15 1 2 1 1
 4 15 1 3 1 1
 4 15 1 4 1 1
 4 15 2 1 1 1
 4 15 2 2 1 1
 4 15 2 3 1 1
 4 15 2 4 1 1
 4 15 3 1 2 1
 4 15 3 2 1 1
 4 15 3 3 1 1
 4 15 3 4 1 1
 4 15 4 1 1 1
 4 15 4 2 1 1
 4 15 4 3 1 1
 4 15 4 4 2 1
 4 15 5 1 2 1
 4 15 5 2 1 1
 4 15 5 3 1 1
 4 15 5 4 2 1
 4 15 6 1 1 1
 4 15 6 2 1 1
 4 15 6 3 1 1
 4 15 6 4 1 1
 4 15 7 1 1 1
 4 15 7 2 2 1
 4 15 7 3 2 1
 4 15 7 4 2 1
 4 15 8 1 1 1
 4 15 8 2 2 1
 4 15 8 3 2 1
 4 15 8 4 1 1
 4 15 9 1 1 1
 4 15 9 2 1 1
 4 15 9 3 2 1
 4 15 9 4 2 1
 4 15 10 1 1 1
 4 15 10 2 1 1
 4 15 10 3 1 1
 4 15 10 4 2 1
 4 15 11 1 1 1
 4 15 11 2 1 1
 4 15 11 3 1 1
 4 15 11 4 1 1
 4 15 12 1 1 1
 4 15 12 2 1 1
 4 15 12 3 2 1
 4 15 12 4 1 1
 4 15 13 1 2 1
 4 15 13 2 1 1
 4 15 13 3 2 1
 4 15 13 4 1 1
 4 15 14 1 1 1
 4 15 14 2 2 1
 4 15 14 3 2 1
 4 15 14 4 1 1
 4 15 15 1 1 1
 4 15 15 2 1 1
 4 15 15 3 1 1
 4 15 15 4 2 1
 4 15 16 1 1 1
 4 15 16 2 1 1
 4 15 16 3 1 1
 4 15 16 4 1 1
 4 15 17 1 1 1
 4 15 17 2 2 1
 4 15 17 3 1 1
 4 15 17 4 2 1
 4 15 18 1 2 1
 4 15 18 2 1 1
 4 15 18 3 1 1
 4 15 18 4 1 1
 4 15 19 1 1 1
 4 15 19 2 1 1
 4 15 19 3 1 1
 4 15 19 4 1 1
 4 15 20 1 2 1
 4 15 20 2 1 1
 4 15 20 3 2 1
 4 15 20 4 2 1
 4 15 21 1 1 1
 4 15 21 2 2 1
 4 15 21 3 2 1
 4 15 21 4 2 1
 4 15 22 1 1 1
 4 15 22 2 1 1
 4 15 22 3 1 1
 4 15 22 4 1 1
 4 15 23 1 1 1
 4 15 23 2 1 1
 4 15 23 3 1 1
 4 15 23 4 1 1
 4 15 24 1 1 1
 4 15 24 2 2 1
 4 15 24 3 1 1
 4 15 24 4 1 1
 4 15 25 1 2 1
 4 15 25 2 2 1
 4 15 25 3 1 1
 4 15 25 4 1 1
 4 15 26 1 1 1
 4 15 26 2 2 1
 4 15 26 3 2 1
 4 15 26 4 1 1
 4 15 27 1 2 1
 4 15 27 2 1 1
 4 15 27 3 1 1
 4 15 27 4 1 1
 4 15 28 1 2 1
 4 15 28 2 1 1
 4 15 28 3 1 1
 4 15 28 4 1 1
 4 15 29 1 1 1
 4 15 29 2 1 1
 4 15 29 3 1 1
 4 15 29 4 2 1
 4 15 30 1 1 1
 4 15 30 2 2 1
 4 15 30 3 1 1
 4 15 30 4 1 1
 4 15 31 1 1 1
 4 15 31 2 1 1
 4 15 31 3 1 1
 4 15 31 4 1 1
 4 15 32 1 2 1
 4 15 32 2 2 1
 4 15 32 3 2 1
 4 15 32 4 1 1
 4 16 1 1 1 1
 4 16 1 2 1 1
 4 16 1 3 1 1
 4 16 1 4 1 1
 4 16 2 1 2 1
 4 16 2 2 1 1
 4 16 2 3 1 1
 4 16 2 4 1 1
 4 16 3 1 1 1
 4 16 3 2 1 1
 4 16 3 3 2 1
 4 16 3 4 1 1
 4 16 4 1 1 1
 4 16 4 2 1 1
 4 16 4 3 1 1
 4 16 4 4 1 1
 4 16 5 1 1 1
 4 16 5 2 2 1
 4 16 5 3 2 1
 4 16 5 4 1 1
 4 16 6 1 1 1
 4 16 6 2 1 1
 4 16 6 3 1 1
 4 16 6 4 1 1
 4 16 7 1 2 1
 4 16 7 2 1 1
 4 16 7 3 1 1
 4 16 7 4 2 1
 4 16 8 1 1 1
 4 16 8 2 1 1
 4 16 8 3 2 1
 4 16 8 4 2 1
 4 16 9 1 1 1
 4 16 9 2 1 1
 4 16 9 3 2 1
 4 16 9 4 2 1
 4 16 10 1 1 1
 4 16 10 2 1 1
 4 16 10 3 2 1
 4 16 10 4 1 1
 4 16 11 1 2 1
 4 16 11 2 1 1
 4 16 11 3 2 1
 4 16 11 4 2 1
 4 16 12 1 2 1
 4 16 12 2 2 1
 4 16 12 3 1 1
 4 16 12 4 2 1
 4 16 13 1 2 1
 4 16 13 2 1 1
 4 16 13 3 1 1
 4 16 13 4 2 1
 4 16 14 1 1 1
 4 16 14 2 2 1
 4 16 14 3 1 1
 4 16 14 4 1 1
 4 16 15 1 2 1
 4 16 15 2 1 1
 4 16 15 3 1 1
 4 16 15 4 2 1
 4 16 16 1 1 1
 4 16 16 2 1 1
 4 16 16 3 1 1
 4 16 16 4 1 1
 4 16 17 1 1 1
 4 16 17 2 2 1
 4 16 17 3 1 1
 4 16 17 4 2 1
 4 16 18 1 1 1
 4 16 18 2 1 1
 4 16 18 3 1 1
 4 16 18 4 1 1
 4 16 19 1 2 1
 4 16 19 2 1 1
 4 16 19 3 1 1
 4 16 19 4 2 1
 4 16 20 1 2 1
 4 16 20 2 1 1
 4 16 20 3 1 1
 4 16 20 4 1 1
 4 16 21 1 2 1
 4 16 21 2 1 1
 4 16 21 3 2 1
 4 16 21 4 1 1
 4 16 22 1 1 1
 4 16 22 2 1 1
 4 16 22 3 1 1
 4 16 22 4 1 1
 4 16 23 1 1 1
 4 16 23 2 2 1
 4 16 23 3 2 1
 4 16 23 4 1 1
 4 16 24 1 1 1
 4 16 24 2 1 1
 4 16 24 3 1 1
 4 16 24 4 1 1
 4 16 25 1 1 1
 4 16 25 2 1 1
 4 16 25 3 2 1
 4 16 25 4 2 1
 4 16 26 1 1 1
 4 16 26 2 1 1
 4 16 26 3 1 1
 4 16 26 4 2 1
 4 16 27 1 1 1
 4 16 27 2 2 1
 4 16 27 3 1 1
 4 16 27 4 1 1
 4 16 28 1 2 1
 4 16 28 2 2 1
 4 16 28 3 2 1
 4 16 28 4 1 1
 4 16 29 1 2 1
 4 16 29 2 1 1
 4 16 29 3 1 1
 4 16 29 4 1 1
 4 16 30 1 2 1
 4 16 30 2 1 1
 4 16 30 3 2 1
 4 16 30 4 1 1
 4 16 31 1 2 1
 4 16 31 2 1 1
 4 16 31 3 1 1
 4 16 31 4 1 1
 4 16 32 1 2 1
 4 16 32 2 1 1
 4 16 32 3 1 1
 4 16 32 4 1 1
 4 17 1 1 1 1
 4 17 1 2 2 1
 4 17 1 3 1 1
 4 17 1 4 1 1
 4 17 2 1 1 1
 4 17 2 2 2 1
 4 17 2 3 1 1
 4 17 2 4 1 1
 4 17 3 1 1 1
 4 17 3 2 1 1
 4 17 3 3 2 1
 4 17 3 4 1 1
 4 17 4 1 1 1
 4 17 4 2 1 1
 4 17 4 3 1 1
 4 17 4 4 1 1
 4 17 5 1 1 1
 4 17 5 2 1 1
 4 17 5 3 1 1
 4 17 5 4 1 1
 4 17 6 1 2 1
 4 17 6 2 2 1
 4 17 6 3 1 1
 4 17 6 4 1 1
 4 17 7 1 1 1
 4 17 7 2 2 1
 4 17 7 3 1 1
 4 17 7 4 1 1
 4 17 8 1 1 1
 4 17 8 2 2 1
 4 17 8 3 1 1
 4 17 8 4 2 1
 4 17 9 1 2 1
 4 17 9 2 1 1
 4 17 9 3 1 1
 4 17 9 4 2 1
 4 17 10 1 2 1
 4 17 10 2 1 1
 4 17 10 3 2 1
 4 17 10 4 1 1
 4 17 11 1 2 1
 4 17 11 2 2 1
 4 17 11 3 2 1
 4 17 11 4 1 1
 4 17 12 1 1 1
 4 17 12 2 1 1
 4 17 12 3 1 1
 4 17 12 4 1 1
 4 17 13 1 1 1
 4 17 13 2 1 1
 4 17 13 3 1 1
 4 17 13 4 2 1
 4 17 14 1 2 1
 4 17 14 2 1 1
 4 17 14 3 1 1
 4 17 14 4 1 1
 4 17 15 1 2 1
 4 17 15 2 1 1
 4 17 15 3 2 1
 4 17 15 4 1 1
 4 17 16 1 1 1
 4 17 16 2 1 1
 4 17 16 3 1 1
 4 17 16 4 1 1
 4 17 17 1 1 1
 4 17 17 2 1 1
 4 17 17 3 1 1
 4 17 17 4 1 1
 4 17 18 1 2 1
 4 17 18 2 1 1
 4 17 18 3 1 1
 4 17 18 4 1 1
 4 17 19 1 1 1
 4 17 19 2 1 1
 4 17 19 3 1 1
 4 17 19 4 2 1
 4 17 20 1 1 1
 4 17 20 2 1 1
 4 17 20 3 1 1
 4 17 20 4 2 1
 4 17 21 1 2 1
 4 17 21 2 1 1
 4 17 21 3 1 1
 4 17 21 4 1 1
 4 17 22 1 1 1
 4 17 22 2 2 1
 4 17 22 3 1 1
 4 17 22 4 1 1
 4 17 23 1 1 1
 4 17 23 2 2 1
 4 17 23 3 1 1
 4 17 23 4 1 1
 4 17 24 1 2 1
 4 17 24 2 1 1
 4 17 24 3 1 1
 4 17 24 4 1 1
 4 17 25 1 2 1
 4 17 25 2 2 1
 4 17 25 3 1 1
 4 17 25 4 2 1
 4 17 26 1 1 1
 4 17 26 2 1 1
 4 17 26 3 1 1
 4 17 26 4 1 1
 4 17 27 1 2 1
 4 17 27 2 2 1
 4 17 27 3 1 1
 4 17 27 4 2 1
 4 17 28 1 1 1
 4 17 28 2 2 1
 4 17 28 3 2 1
 4 17 28 4 1 1
 4 17 29 1 2 1
 4 17 29 2 2 1
 4 17 29 3 2 1
 4 17 29 4 1 1
 4 17 30 1 1 1
 4 17 30 2 1 1
 4 17 30 3 2 1
 4 17 30 4 2 1
 4 17 31 1 1 1
 4 17 31 2 1 1
 4 17 31 3 2 1
 4 17 31 4 1 1
 4 17 32 1 2 1
 4 17 32 2 1 1
 4 17 32 3 1 1
 4 17 32 4 2 1
 4 18 1 1 2 1
 4 18 1 2 2 1
 4 18 1 3 2 1
 4 18 1 4 2 1
 4 18 2 1 1 1
 4 18 2 2 1 1
 4 18 2 3 1 1
 4 18 2 4 2 1
 4 18 3 1 2 1
 4 18 3 2 2 1
 4 18 3 3 1 1
 4 18 3 4 1 1
 4 18 4 1 1 1
 4 18 4 2 2 1
 4 18 4 3 1 1
 4 18 4 4 2 1
 4 18 5 1 2 1
 4 18 5 2 2 1
 4 18 5 3 1 1
 4 18 5 4 2 1
 4 18 6 1 2 1
 4 18 6 2 2 1
 4 18 6 3 1 1
 4 18 6 4 1 1
 4 18 7 1 2 1
 4 18 7 2 1 1
 4 18 7 3 2 1
 4 18 7 4 2 1
 4 18 8 1 1 1
 4 18 8 2 1 1
 4 18 8 3 1 1
 4 18 8 4 1 1
 4 18 9 1 1 1
 4 18 9 2 1 1
 4 18 9 3 1 1
 4 18 9 4 2 1
 4 18 10 1 1 1
 4 18 10 2 2 1
 4 18 10 3 1 1
 4 18 10 4 1 1
 4 18 11 1 1 1
 4 18 11 2 1 1
 4 18 11 3 1 1
 4 18 11 4 1 1
 4 18 12 1 1 1
 4 18 12 2 1 1
 4 18 12 3 1 1
 4 18 12 4 2 1
 4 18 13 1 1 1
 4 18 13 2 2 1
 4 18 13 3 1 1
 4 18 13 4 1 1
 4 18 14 1 2 1
 4 18 14 2 2 1
 4 18 14 3 1 1
 4 18 14 4 2 1
 4 18 15 1 2 1
 4 18 15 2 1 1
 4 18 15 3 1 1
 4 18 15 4 1 1
 4 18 16 1 1 1
 4 18 16 2 2 1
 4 18 16 3 1 1
 4 18 16 4 1 1
 4 18 17 1 1 1
 4 18 17 2 2 1
 4 18 17 3 1 1
 4 18 17 4 1 1
 4 18 18 1 1 1
 4 18 18 2 2 1
 4 18 18 3 1 1
 4 18 18 4 1 1
 4 18 19 1 2 1
 4 18 19 2 1 1
 4 18 19 3 1 1
 4 18 19 4 1 1
 4 18 20 1 1 1
 4 18 20 2 2 1
 4 18 20 3 1 1
 4 18 20 4 1 1
 4 18 21 1 1 1
 4 18 21 2 2 1
 4 18 21 3 1 1
 4 18 21 4 1 1
 4 18 22 1 1 1
 4 18 22 2 2 1
 4 18 22 3 1 1
 4 18 22 4 2 1
 4 18 23 1 2 1
 4 18 23 2 1 1
 4 18 23 3 1 1
 4 18 23 4 1 1
 4 18 24 1 2 1
 4 18 24 2 1 1
 4 18 24 3 1 1
 4 18 24 4 1 1
 4 18 25 1 1 1
 4 18 25 2 1 1
 4 18 25 3 1 1
 4 18 25 4 1 1
 4 18 26 1 1 1
 4 18 26 2 2 1
 4 18 26 3 2 1
 4 18 26 4 1 1
 4 18 27 1 2 1
 4 18 27 2 1 1
 4 18 27 3 1 1
 4 18 27 4 1 1
 4 18 28 1 1 1
 4 18 28 2 1 1
 4 18 28 3 1 1
 4 18 28 4 1 1
 4 18 29 1 1 1
 4 18 29 2 1 1
 4 18 29 3 1 1
 4 18 29 4 1 1
 4 18 30 1 1 1
 4 18 30 2 1 1
 4 18 30 3 1 1
 4 18 30 4 2 1
 4 18 31 1 1 1
 4 18 31 2 2 1
 4 18 31 3 1 1
 4 18 31 4 1 1
 4 18 32 1 1 1
 4 18 32 2 1 1
 4 18 32 3 2 1
 4 18 32 4 2 1
 4 19 1 1 1 1
 4 19 1 2 1 1
 4 19 1 3 1 1
 4 19 1 4 1 1
 4 19 2 1 1 1
 4 19 2 2 1 1
 4 19 2 3 2 1
 4 19 2 4 2 1
 4 19 3 1 1 1
 4 19 3 2 1 1
 4 19 3 3 1 1
 4 19 3 4 2 1
 4 19 4 1 1 1
 4 19 4 2 1 1
 4 19 4 3 2 1
 4 19 4 4 1 1
 4 19 5 1 1 1
 4 19 5 2 1 1
 4 19 5 3 1 1
 4 19 5 4 1 1
 4 19 6 1 2 1
 4 19 6 2 1 1
 4 19 6 3 1 1
 4 19 6 4 1 1
 4 19 7 1 2 1
 4 19 7 2 1 1
 4 19 7 3 1 1
 4 19 7 4 1 1
 4 19 8 1 2 1
 4 19 8 2 1 1
 4 19 8 3 1 1
 4 19 8 4 2 1
 4 19 9 1 2 1
 4 19 9 2 1 1
 4 19 9 3 2 1
 4 19 9 4 1 1
 4 19 10 1 1 1
 4 19 10 2 2 1
 4 19 10 3 2 1
 4 19 10 4 1 1
 4 19 11 1 1 1
 4 19 11 2 1 1
 4 19 11 3 2 1
 4 19 11 4 1 1
 4 19 12 1 2 1
 4 19 12 2 1 1
 4 19 12 3 1 1
 4 19 12 4 1 1
 4 19 13 1 1 1
 4 19 13 2 1 1
 4 19 13 3 1 1
 4 19 13 4 2 1
 4 19 14 1 2 1
 4 19 14 2 1 1
 4 19 14 3 1 1
 4 19 14 4 2 1
 4 19 15 1 2 1
 4 19 15 2 2 1
 4 19 15 3 2 1
 4 19 15 4 2 1
 4 19 16 1 2 1
 4 19 16 2 2 1
 4 19 16 3 2 1
 4 19 16 4 2 1
 4 19 17 1 1 1
 4 19 17 2 2 1
 4 19 17 3 1 1
 4 19 17 4 1 1
 4 19 18 1 1 1
 4 19 18 2 1 1
 4 19 18 3 2 1
 4 19 18 4 1 1
 4 19 19 1 2 1
 4 19 19 2 2 1
 4 19 19 3 1 1
 4 19 19 4 2 1
 4 19 20 1 2 1
 4 19 20 2 2 1
 4 19 20 3 1 1
 4 19 20 4 1 1
 4 19 21 1 1 1
 4 19 21 2 1 1
 4 19 21 3 1 1
 4 19 21 4 1 1
 4 19 22 1 2 1
 4 19 22 2 1 1
 4 19 22 3 1 1
 4 19 22 4 2 1
 4 19 23 1 1 1
 4 19 23 2 1 1
 4 19 23 3 1 1
 4 19 23 4 1 1
 4 19 24 1 1 1
 4 19 24 2 1 1
 4 19 24 3 1 1
 4 19 24 4 1 1
 4 19 25 1 2 1
 4 19 25 2 1 1
 4 19 25 3 1 1
 4 19 25 4 1 1
 4 19 26 1 2 1
 4 19 26 2 1 1
 4 19 26 3 1 1
 4 19 26 4 2 1
 4 19 27 1 1 1
 4 19 27 2 1 1
 4 19 27 3 2 1
 4 19 27 4 1 1
 4 19 28 1 1 1
 4 19 28 2 2 1
 4 19 28 3 2 1
 4 19 28 4 2 1
 4 19 29 1 1 1
 4 19 29 2 1 1
 4 19 29 3 1 1
 4 19 29 4 1 1
 4 19 30 1 1 1
 4 19 30 2 1 1
 4 19 30 3 2 1
 4 19 30 4 1 1
 4 19 31 1 1 1
 4 19 31 2 1 1
 4 19 31 3 2 1
 4 19 31 4 1 1
 4 19 32 1 1 1
 4 19 32 2 1 1
 4 19 32 3 1 1
 4 19 32 4 1 1
 4 20 1 1 1 1
 4 20 1 2 2 1
 4 20 1 3 1 1
 4 20 1 4 1 1
 4 20 2 1 1 1
 4 20 2 2 1 1
 4 20 2 3 1 1
 4 20 2 4 2 1
 4 20 3 1 1 1
 4 20 3 2 2 1
 4 20 3 3 1 1
 4 20 3 4 1 1
 4 20 4 1 1 1
 4 20 4 2 1 1
 4 20 4 3 1 1
 4 20 4 4 2 1
 4 20 5 1 1 1
 4 20 5 2 1 1
 4 20 5 3 2 1
 4 20 5 4 2 1
 4 20 6 1 1 1
 4 20 6 2 1 1
 4 20 6 3 1 1
 4 20 6 4 1 1
 4 20 7 1 2 1
 4 20 7 2 1 1
 4 20 7 3 1 1
 4 20 7 4 1 1
 4 20 8 1 2 1
 4 20 8 2 2 1
 4 20 8 3 1 1
 4 20 8 4 1 1
 4 20 9 1 1 1
 4 20 9 2 2 1
 4 20 9 3 1 1
 4 20 9 4 1 1
 4 20 10 1 1 1
 4 20 10 2 1 1
 4 20 10 3 1 1
 4 20 10 4 2 1
 4 20 11 1 2 1
 4 20 11 2 1 1
 4 20 11 3 2 1
 4 20 11 4 1 1
 4 20 12 1 2 1
 4 20 12 2 1 1
 4 20 12 3 1 1
 4 20 12 4 1 1
 4 20 13 1 2 1
 4 20 13 2 1 1
 4 20 13 3 1 1
 4 20 13 4 1 1
 4 20 14 1 1 1
 4 20 14 2 1 1
 4 20 14 3 1 1
 4 20 14 4 1 1
 4 20 15 1 1 1
 4 20 15 2 2 1
 4 20 15 3 2 1
 4 20 15 4 2 1
 4 20 16 1 1 1
 4 20 16 2 1 1
 4 20 16 3 1 1
 4 20 16 4 1 1
 4 20 17 1 2 1
 4 20 17 2 2 1
 4 20 17 3 2 1
 4 20 17 4 1 1
 4 20 18 1 1 1
 4 20 18 2 1 1
 4 20 18 3 1 1
 4 20 18 4 2 1
 4 20 19 1 1 1
 4 20 19 2 2 1
 4 20 19 3 2 1
 4 20 19 4 2 1
 4 20 20 1 1 1
 4 20 20 2 2 1
 4 20 20 3 2 1
 4 20 20 4 1 1
 4 20 21 1 1 1
 4 20 21 2 2 1
 4 20 21 3 1 1
 4 20 21 4 1 1
 4 20 22 1 1 1
 4 20 22 2 1 1
 4 20 22 3 1 1
 4 20 22 4 2 1
 4 20 23 1 1 1
 4 20 23 2 1 1
 4 20 23 3 1 1
 4 20 23 4 2 1
 4 20 24 1 2 1
 4 20 24 2 1 1
 4 20 24 3 1 1
 4 20 24 4 2 1
 4 20 25 1 1 1
 4 20 25 2 2 1
 4 20 25 3 1 1
 4 20 25 4 2 1
 4 20 26 1 1 1
 4 20 26 2 1 1
 4 20 26 3 1 1
 4 20 26 4 2 1
 4 20 27 1 1 1
 4 20 27 2 1 1
 4 20 27 3 2 1
 4 20 27 4 1 1
 4 20 28 1 1 1
 4 20 28 2 1 1
 4 20 28 3 2 1
 4 20 28 4 1 1
 4 20 29 1 2 1
 4 20 29 2 1 1
 4 20 29 3 1 1
 4 20 29 4 1 1
 4 20 30 1 1 1
 4 20 30 2 1 1
 4 20 30 3 1 1
 4 20 30 4 2 1
 4 20 31 1 1 1
 4 20 31 2 2 1
 4 20 31 3 1 1
 4 20 31 4 2 1
 4 20 32 1 1 1
 4 20 32 2 1 1
 4 20 32 3 1 1
 4 20 32 4 1 1
 4 21 1 1 2 1
 4 21 1 2 2 1
 4 21 1 3 1 1
 4 21 1 4 1 1
 4 21 2 1 1 1
 4 21 2 2 1 1
 4 21 2 3 1 1
 4 21 2 4 1 1
 4 21 3 1 1 1
 4 21 3 2 2 1
 4 21 3 3 1 1
 4 21 3 4 2 1
 4 21 4 1 1 1
 4 21 4 2 1 1
 4 21 4 3 1 1
 4 21 4 4 2 1
 4 21 5 1 2 1
 4 21 5 2 1 1
 4 21 5 3 1 1
 4 21 5 4 1 1
 4 21 6 1 1 1
 4 21 6 2 2 1
 4 21 6 3 1 1
 4 21 6 4 1 1
 4 21 7 1 1 1
 4 21 7 2 2 1
 4 21 7 3 2 1
 4 21 7 4 1 1
 4 21 8 1 1 1
 4 21 8 2 1 1
 4 21 8 3 1 1
 4 21 8 4 1 1
 4 21 9 1 1 1
 4 21 9 2 2 1
 4 21 9 3 1 1
 4 21 9 4 1 1
 4 21 10 1 1 1
 4 21 10 2 1 1
 4 21 10 3 1 1
 4 21 10 4 2 1
 4 21 11 1 1 1
 4 21 11 2 1 1
 4 21 11 3 1 1
 4 21 11 4 2 1
 4 21 12 1 2 1
 4 21 12 2 2 1
 4 21 12 3 1 1
 4 21 12 4 1 1
 4 21 13 1 1 1
 4 21 13 2 1 1
 4 21 13 3 2 1
 4 21 13 4 2 1
 4 21 14 1 1 1
 4 21 14 2 1 1
 4 21 14 3 1 1
 4 21 14 4 1 1
 4 21 15 1 1 1
 4 21 15 2 2 1
 4 21 15 3 1 1
 4 21 15 4 1 1
 4 21 16 1 1 1
 4 21 16 2 2 1
 4 21 16 3 1 1
 4 21 16 4 1 1
 4 21 17 1 1 1
 4 21 17 2 1 1
 4 21 17 3 1 1
 4 21 17 4 1 1
 4 21 18 1 1 1
 4 21 18 2 1 1
 4 21 18 3 1 1
 4 21 18 4 2 1
 4 21 19 1 2 1
 4 21 19 2 2 1
 4 21 19 3 1 1
 4 21 19 4 1 1
 4 21 20 1 2 1
 4 21 20 2 1 1
 4 21 20 3 1 1
 4 21 20 4 1 1
 4 21 21 1 1 1
 4 21 21 2 1 1
 4 21 21 3 2 1
 4 21 21 4 1 1
 4 21 22 1 2 1
 4 21 22 2 1 1
 4 21 22 3 1 1
 4 21 22 4 1 1
 4 21 23 1 1 1
 4 21 23 2 2 1
 4 21 23 3 2 1
 4 21 23 4 2 1
 4 21 24 1 1 1
 4 21 24 2 2 1
 4 21 24 3 1 1
 4 21 24 4 1 1
 4 21 25 1 1 1
 4 21 25 2 2 1
 4 21 25 3 2 1
 4 21 25 4 1 1
 4 21 26 1 1 1
 4 21 26 2 1 1
 4 21 26 3 2 1
 4 21 26 4 1 1
 4 21 27 1 1 1
 4 21 27 2 1 1
 4 21 27 3 1 1
 4 21 27 4 1 1
 4 21 28 1 1 1
 4 21 28 2 1 1
 4 21 28 3 1 1
 4 21 28 4 2 1
 4 21 29 1 1 1
 4 21 29 2 2 1
 4 21 29 3 2 1
 4 21 29 4 2 1
 4 21 30 1 1 1
 4 21 30 2 1 1
 4 21 30 3 1 1
 4 21 30 4 2 1
 4 21 31 1 1 1
 4 21 31 2 1 1
 4 21 31 3 2 1
 4 21 31 4 2 1
 4 21 32 1 1 1
 4 21 32 2 2 1
 4 21 32 3 1 1
 4 21 32 4 2 1
 4 22 1 1 2 1
 4 22 1 2 2 1
 4 22 1 3 1 1
 4 22 1 4 2 1
 4 22 2 1 1 1
 4 22 2 2 1 1
 4 22 2 3 2 1
 4 22 2 4 1 1
 4 22 3 1 1 1
 4 22 3 2 1 1
 4 22 3 3 2 1
 4 22 3 4 1 1
 4 22 4 1 1 1
 4 22 4 2 2 1
 4 22 4 3 1 1
 4 22 4 4 1 1
 4 22 5 1 1 1
 4 22 5 2 1 1
 4 22 5 3 2 1
 4 22 5 4 2 1
 4 22 6 1 1 1
 4 22 6 2 1 1
 4 22 6 3 1 1
 4 22 6 4 2 1
 4 22 7 1 1 1
 4 22 7 2 1 1
 4 22 7 3 1 1
 4 22 7 4 1 1
 4 22 8 1 1 1
 4 22 8 2 2 1
 4 22 8 3 2 1
 4 22 8 4 2 1
 4 22 9 1 1 1
 4 22 9 2 2 1
 4 22 9 3 1 1
 4 22 9 4 1 1
 4 22 10 1 2 1
 4 22 10 2 1 1
 4 22 10 3 1 1
 4 22 10 4 1 1
 4 22 11 1 1 1
 4 22 11 2 1 1
 4 22 11 3 1 1
 4 22 11 4 2 1
 4 22 12 1 2 1
 4 22 12 2 1 1
 4 22 12 3 1 1
 4 22 12 4 1 1
 4 22 13 1 1 1
 4 22 13 2 2 1
 4 22 13 3 1 1
 4 22 13 4 1 1
 4 22 14 1 1 1
 4 22 14 2 2 1
 4 22 14 3 1 1
 4 22 14 4 1 1
 4 22 15 1 1 1
 4 22 15 2 1 1
 4 22 15 3 1 1
 4 22 15 4 1 1
 4 22 16 1 1 1
 4 22 16 2 1 1
 4 22 16 3 1 1
 4 22 16 4 1 1
 4 22 17 1 2 1
 4 22 17 2 1 1
 4 22 17 3 1 1
 4 22 17 4 1 1
 4 22 18 1 1 1
 4 22 18 2 1 1
 4 22 18 3 1 1
 4 22 18 4 2 1
 4 22 19 1 2 1
 4 22 19 2 1 1
 4 22 19 3 2 1
 4 22 19 4 2 1
 4 22 20 1 1 1
 4 22 20 2 2 1
 4 22 20 3 1 1
 4 22 20 4 2 1
 4 22 21 1 1 1
 4 22 21 2 1 1
 4 22 21 3 1 1
 4 22 21 4 2 1
 4 22 22 1 2 1
 4 22 22 2 2 1
 4 22 22 3 1 1
 4 22 22 4 2 1
 4 22 23 1 2 1
 4 22 23 2 1 1
 4 22 23 3 2 1
 4 22 23 4 1 1
 4 22 24 1 1 1
 4 22 24 2 1 1
 4 22 24 3 1 1
 4 22 24 4 1 1
 4 22 25 1 1 1
 4 22 25 2 1 1
 4 22 25 3 1 1
 4 22 25 4 1 1
 4 22 26 1 1 1
 4 22 26 2 1 1
 4 22 26 3 2 1
 4 22 26 4 1 1
 4 22 27 1 2 1
 4 22 27 2 1 1
 4 22 27 3 1 1
 4 22 27 4 2 1
 4 22 28 1 2 1
 4 22 28 2 1 1
 4 22 28 3 1 1
 4 22 28 4 1 1
 4 22 29 1 2 1
 4 22 29 2 1 1
 4 22 29 3 1 1
 4 22 29 4 2 1
 4 22 30 1 1 1
 4 22 30 2 2 1
 4 22 30 3 2 1
 4 22 30 4 1 1
 4 22 31 1 2 1
 4 22 31 2 1 1
 4 22 31 3 2 1
 4 22 31 4 2 1
 4 22 32 1 2 1
 4 22 32 2 2 1
 4 22 32 3 1 1
 4 22 32 4 1 1
 4 23 1 1 2 1
 4 23 1 2 1 1
 4 23 1 3 2 1
 4 23 1 4 2 1
 4 23 2 1 1 1
 4 23 2 2 1 1
 4 23 2 3 2 1
 4 23 2 4 1 1
 4 23 3 1 1 1
 4 23 3 2 1 1
 4 23 3 3 1 1
 4 23 3 4 1 1
 4 23 4 1 2 1
 4 23 4 2 1 1
 4 23 4 3 1 1
 4 23 4 4 2 1
 4 23 5 1 1 1
 4 23 5 2 2 1
 4 23 5 3 1 1
 4 23 5 4 1 1
 4 23 6 1 1 1
 4 23 6 2 1 1
 4 23 6 3 1 1
 4 23 6 4 2 1
 4 23 7 1 1 1
 4 23 7 2 1 1
 4 23 7 3 1 1
 4 23 7 4 1 1
 4 23 8 1 2 1
 4 23 8 2 1 1
 4 23 8 3 2 1
 4 23 8 4 1 1
 4 23 9 1 1 1
 4 23 9 2 1 1
 4 23 9 3 1 1
 4 23 9 4 2 1
 4 23 10 1 1 1
 4 23 10 2 1 1
 4 23 10 3 1 1
 4 23 10 4 1 1
 4 23 11 1 1 1
 4 23 11 2 2 1
 4 23 11 3 1 1
 4 23 11 4 2 1
 4 23 12 1 1 1
 4 23 12 2 2 1
 4 23 12 3 2 1
 4 23 12 4 1 1
 4 23 13 1 1 1
 4 23 13 2 1 1
 4 23 13 3 1 1
 4 23 13 4 1 1
 4 23 14 1 2 1
 4 23 14 2 1 1
 4 23 14 3 2 1
 4 23 14 4 1 1
 4 23 15 1 1 1
 4 23 15 2 1 1
 4 23 15 3 1 1
 4 23 15 4 2 1
 4 23 16 1 1 1
 4 23 16 2 1 1
 4 23 16 3 1 1
 4 23 16 4 1 1
 4 23 17 1 1 1
 4 23 17 2 1 1
 4 23 17 3 1 1
 4 23 17 4 1 1
 4 23 18 1 2 1
 4 23 18 2 2 1
 4 23 18 3 1 1
 4 23 18 4 1 1
 4 23 19 1 2 1
 4 23 19 2 1 1
 4 23 19 3 2 1
 4 23 19 4 2 1
 4 23 20 1 1 1
 4 23 20 2 2 1
 4 23 20 3 2 1
 4 23 20 4 1 1
 4 23 21 1 1 1
 4 23 21 2 2 1
 4 23 21 3 2 1
 4 23 21 4 1 1
 4 23 22 1 2 1
 4 23 22 2 2 1
 4 23 22 3 1 1
 4 23 22 4 1 1
 4 23 23 1 1 1
 4 23 23 2 2 1
 4 23 23 3 2 1
 4 23 23 4 2 1
 4 23 24 1 1 1
 4 23 24 2 1 1
 4 23 24 3 1 1
 4 23 24 4 2 1
 4 23 25 1 2 1
 4 23 25 2 1 1
 4 23 25 3 2 1
 4 23 25 4 2 1
 4 23 26 1 2 1
 4 23 26 2 1 1
 4 23 26 3 2 1
 4 23 26 4 1 1
 4 23 27 1 1 1
 4 23 27 2 2 1
 4 23 27 3 1 1
 4 23 27 4 2 1
 4 23 28 1 1 1
 4 23 28 2 1 1
 4 23 28 3 1 1
 4 23 28 4 2 1
 4 23 29 1 1 1
 4 23 29 2 1 1
 4 23 29 3 1 1
 4 23 29 4 1 1
 4 23 30 1 1 1
 4 23 30 2 1 1
 4 23 30 3 2 1
 4 23 30 4 1 1
 4 23 31 1 2 1
 4 23 31 2 2 1
 4 23 31 3 1 1
 4 23 31 4 1 1
 4 23 32 1 1 1
 4 23 32 2 2 1
 4 23 32 3 2 1
 4 23 32 4 2 1
 4 24 1 1 1 1
 4 24 1 2 1 1
 4 24 1 3 1 1
 4 24 1 4 2 1
 4 24 2 1 2 1
 4 24 2 2 2 1
 4 24 2 3 1 1
 4 24 2 4 2 1
 4 24 3 1 1 1
 4 24 3 2 1 1
 4 24 3 3 1 1
 4 24 3 4 2 1
 4 24 4 1 1 1
 4 24 4 2 1 1
 4 24 4 3 1 1
 4 24 4 4 1 1
 4 24 5 1 1 1
 4 24 5 2 2 1
 4 24 5 3 1 1
 4 24 5 4 1 1
 4 24 6 1 2 1
 4 24 6 2 2 1
 4 24 6 3 1 1
 4 24 6 4 1 1
 4 24 7 1 1 1
 4 24 7 2 1 1
 4 24 7 3 1 1
 4 24 7 4 2 1
 4 24 8 1 1 1
 4 24 8 2 2 1
 4 24 8 3 2 1
 4 24 8 4 1 1
 4 24 9 1 2 1
 4 24 9 2 1 1
 4 24 9 3 1 1
 4 24 9 4 1 1
 4 24 10 1 2 1
 4 24 10 2 2 1
 4 24 10 3 1 1
 4 24 10 4 1 1
 4 24 11 1 2 1
 4 24 11 2 1 1
 4 24 11 3 1 1
 4 24 11 4 1 1
 4 24 12 1 1 1
 4 24 12 2 1 1
 4 24 12 3 1 1
 4 24 12 4 2 1
 4 24 13 1 1 1
 4 24 13 2 1 1
 4 24 13 3 2 1
 4 24 13 4 1 1
 4 24 14 1 1 1
 4 24 14 2 2 1
 4 24 14 3 1 1
 4 24 14 4 1 1
 4 24 15 1 1 1
 4 24 15 2 1 1
 4 24 15 3 1 1
 4 24 15 4 1 1
 4 24 16 1 1 1
 4 24 16 2 1 1
 4 24 16 3 2 1
 4 24 16 4 1 1
 4 24 17 1 1 1
 4 24 17 2 2 1
 4 24 17 3 1 1
 4 24 17 4 1 1
 4 24 18 1 1 1
 4 24 18 2 1 1
 4 24 18 3 1 1
 4 24 18 4 1 1
 4 24 19 1 1 1
 4 24 19 2 1 1
 4 24 19 3 1 1
 4 24 19 4 1 1
 4 24 20 1 1 1
 4 24 20 2 1 1
 4 24 20 3 1 1
 4 24 20 4 2 1
 4 24 21 1 1 1
 4 24 21 2 1 1
 4 24 21 3 1 1
 4 24 21 4 2 1
 4 24 22 1 1 1
 4 24 22 2 1 1
 4 24 22 3 2 1
 4 24 22 4 2 1
 4 24 23 1 1 1
 4 24 23 2 1 1
 4 24 23 3 1 1
 4 24 23 4 1 1
 4 24 24 1 2 1
 4 24 24 2 1 1
 4 24 24 3 2 1
 4 24 24 4 1 1
 4 24 25 1 1 1
 4 24 25 2 2 1
 4 24 25 3 1 1
 4 24 25 4 1 1
 4 24 26 1 1 1
 4 24 26 2 1 1
 4 24 26 3 2 1
 4 24 26 4 2 1
 4 24 27 1 1 1
 4 24 27 2 1 1
 4 24 27 3 1 1
 4 24 27 4 1 1
 4 24 28 1 1 1
 4 24 28 2 2 1
 4 24 28 3 1 1
 4 24 28 4 1 1
 4 24 29 1 1 1
 4 24 29 2 1 1
 4 24 29 3 1 1
 4 24 29 4 2 1
 4 24 30 1 1 1
 4 24 30 2 1 1
 4 24 30 3 1 1
 4 24 30 4 1 1
 4 24 31 1 1 1
 4 24 31 2 1 1
 4 24 31 3 2 1
 4 24 31 4 1 1
 4 24 32 1 1 1
 4 24 32 2 1 1
 4 24 32 3 2 1
 4 24 32 4 2 1
 4 25 1 1 1 1
 4 25 1 2 1 1
 4 25 1 3 2 1
 4 25 1 4 1 1
 4 25 2 1 1 1
 4 25 2 2 1 1
 4 25 2 3 2 1
 4 25 2 4 2 1
 4 25 3 1 1 1
 4 25 3 2 1 1
 4 25 3 3 2 1
 4 25 3 4 1 1
 4 25 4 1 1 1
 4 25 4 2 2 1
 4 25 4 3 1 1
 4 25 4 4 1 1
 4 25 5 1 2 1
 4 25 5 2 1 1
 4 25 5 3 2 1
 4 25 5 4 1 1
 4 25 6 1 1 1
 4 25 6 2 2 1
 4 25 6 3 1 1
 4 25 6 4 2 1
 4 25 7 1 2 1
 4 25 7 2 1 1
 4 25 7 3 1 1
 4 25 7 4 1 1
 4 25 8 1 1 1
 4 25 8 2 2 1
 4 25 8 3 1 1
 4 25 8 4 1 1
 4 25 9 1 1 1
 4 25 9 2 1 1
 4 25 9 3 1 1
 4 25 9 4 2 1
 4 25 10 1 1 1
 4 25 10 2 1 1
 4 25 10 3 1 1
 4 25 10 4 1 1
 4 25 11 1 2 1
 4 25 11 2 2 1
 4 25 11 3 2 1
 4 25 11 4 1 1
 4 25 12 1 1 1
 4 25 12 2 2 1
 4 25 12 3 2 1
 4 25 12 4 1 1
 4 25 13 1 1 1
 4 25 13 2 1 1
 4 25 13 3 1 1
 4 25 13 4 1 1
 4 25 14 1 1 1
 4 25 14 2 1 1
 4 25 14 3 1 1
 4 25 14 4 1 1
 4 25 15 1 2 1
 4 25 15 2 2 1
 4 25 15 3 2 1
 4 25 15 4 1 1
 4 25 16 1 1 1
 4 25 16 2 2 1
 4 25 16 3 1 1
 4 25 16 4 1 1
 4 25 17 1 1 1
 4 25 17 2 1 1
 4 25 17 3 2 1
 4 25 17 4 1 1
 4 25 18 1 2 1
 4 25 18 2 2 1
 4 25 18 3 1 1
 4 25 18 4 1 1
 4 25 19 1 1 1
 4 25 19 2 1 1
 4 25 19 3 1 1
 4 25 19 4 1 1
 4 25 20 1 1 1
 4 25 20 2 1 1
 4 25 20 3 1 1
 4 25 20 4 2 1
 4 25 21 1 1 1
 4 25 21 2 1 1
 4 25 21 3 2 1
 4 25 21 4 2 1
 4 25 22 1 1 1
 4 25 22 2 1 1
 4 25 22 3 1 1
 4 25 22 4 1 1
 4 25 23 1 1 1
 4 25 23 2 1 1
 4 25 23 3 1 1
 4 25 23 4 2 1
 4 25 24 1 1 1
 4 25 24 2 1 1
 4 25 24 3 1 1
 4 25 24 4 1 1
 4 25 25 1 2 1
 4 25 25 2 1 1
 4 25 25 3 2 1
 4 25 25 4 1 1
 4 25 26 1 1 1
 4 25 26 2 2 1
 4 25 26 3 1 1
 4 25 26 4 2 1
 4 25 27 1 1 1
 4 25 27 2 1 1
 4 25 27 3 2 1
 4 25 27 4 1 1
 4 25 28 1 1 1
 4 25 28 2 1 1
 4 25 28 3 2 1
 4 25 28 4 1 1
 4 25 29 1 1 1
 4 25 29 2 1 1
 4 25 29 3 2 1
 4 25 29 4 2 1
 4 25 30 1 1 1
 4 25 30 2 1 1
 4 25 30 3 1 1
 4 25 30 4 1 1
 4 25 31 1 1 1
 4 25 31 2 1 1
 4 25 31 3 2 1
 4 25 31 4 2 1
 4 25 32 1 2 1
 4 25 32 2 1 1
 4 25 32 3 1 1
 4 25 32 4 2 1
 4 26 1 1 1 1
 4 26 1 2 1 1
 4 26 1 3 1 1
 4 26 1 4 2 1
 4 26 2 1 2 1
 4 26 2 2 2 1
 4 26 2 3 2 1
 4 26 2 4 1 1
 4 26 3 1 1 1
 4 26 3 2 1 1
 4 26 3 3 2 1
 4 26 3 4 1 1
 4 26 4 1 1 1
 4 26 4 2 1 1
 4 26 4 3 2 1
 4 26 4 4 1 1
 4 26 5 1 2 1
 4 26 5 2 1 1
 4 26 5 3 1 1
 4 26 5 4 1 1
 4 26 6 1 1 1
 4 26 6 2 1 1
 4 26 6 3 2 1
 4 26 6 4 2 1
 4 26 7 1 1 1
 4 26 7 2 1 1
 4 26 7 3 1 1
 4 26 7 4 1 1
 4 26 8 1 1 1
 4 26 8 2 2 1
 4 26 8 3 2 1
 4 26 8 4 1 1
 4 26 9 1 2 1
 4 26 9 2 1 1
 4 26 9 3 2 1
 4 26 9 4 1 1
 4 26 10 1 1 1
 4 26 10 2 1 1
 4 26 10 3 1 1
 4 26 10 4 2 1
 4 26 11 1 1 1
 4 26 11 2 2 1
 4 26 11 3 1 1
 4 26 11 4 2 1
 4 26 12 1 1 1
 4 26 12 2 1 1
 4 26 12 3 1 1
 4 26 12 4 1 1
 4 26 13 1 2 1
 4 26 13 2 2 1
 4 26 13 3 1 1
 4 26 13 4 2 1
 4 26 14 1 2 1
 4 26 14 2 1 1
 4 26 14 3 1 1
 4 26 14 4 1 1
 4 26 15 1 2 1
 4 26 15 2 1 1
 4 26 15 3 1 1
 4 26 15 4 1 1
 4 26 16 1 2 1
 4 26 16 2 1 1
 4 26 16 3 1 1
 4 26 16 4 1 1
 4 26 17 1 2 1
 4 26 17 2 1 1
 4 26 17 3 1 1
 4 26 17 4 1 1
 4 26 18 1 1 1
 4 26 18 2 1 1
 4 26 18 3 2 1
 4 26 18 4 1 1
 4 26 19 1 2 1
 4 26 19 2 1 1
 4 26 19 3 2 1
 4 26 19 4 1 1
 4 26 20 1 1 1
 4 26 20 2 2 1
 4 26 20 3 1 1
 4 26 20 4 1 1
 4 26 21 1 1 1
 4 26 21 2 2 1
 4 26 21 3 1 1
 4 26 21 4 2 1
 4 26 22 1 1 1
 4 26 22 2 2 1
 4 26 22 3 1 1
 4 26 22 4 2 1
 4 26 23 1 2 1
 4 26 23 2 1 1
 4 26 23 3 1 1
 4 26 23 4 2 1
 4 26 24 1 2 1
 4 26 24 2 1 1
 4 26 24 3 1 1
 4 26 24 4 2 1
 4 26 25 1 2 1
 4 26 25 2 1 1
 4 26 25 3 1 1
 4 26 25 4 1 1
 4 26 26 1 2 1
 4 26 26 2 2 1
 4 26 26 3 2 1
 4 26 26 4 2 1
 4 26 27 1 1 1
 4 26 27 2 2 1
 4 26 27 3 1 1
 4 26 27 4 1 1
 4 26 28 1 1 1
 4 26 28 2 1 1
 4 26 28 3 1 1
 4 26 28 4 1 1
 4 26 29 1 1 1
 4 26 29 2 1 1
 4 26 29 3 1 1
 4 26 29 4 1 1
 4 26 30 1 1 1
 4 26 30 2 1 1
 4 26 30 3 1 1
 4 26 30 4 1 1
 4 26 31 1 2 1
 4 26 31 2 1 1
 4 26 31 3 2 1
 4 26 31 4 1 1
 4 26 32 1 2 1
 4 26 32 2 1 1
 4 26 32 3 2 1
 4 26 32 4 2 1
 4 27 1 1 1 1
 4 27 1 2 1 1
 4 27 1 3 2 1
 4 27 1 4 2 1
 4 27 2 1 2 1
 4 27 2 2 1 1
 4 27 2 3 2 1
 4 27 2 4 1 1
 4 27 3 1 2 1
 4 27 3 2 2 1
 4 27 3 3 1 1
 4 27 3 4 1 1
 4 27 4 1 1 1
 4 27 4 2 2 1
 4 27 4 3 1 1
 4 27 4 4 1 1
 4 27 5 1 2 1
 4 27 5 2 1 1
 4 27 5 3 1 1
 4 27 5 4 1 1
 4 27 6 1 1 1
 4 27 6 2 2 1
 4 27 6 3 1 1
 4 27 6 4 1 1
 4 27 7 1 1 1
 4 27 7 2 2 1
 4 27 7 3 2 1
 4 27 7 4 1 1
 4 27 8 1 1 1
 4 27 8 2 1 1
 4 27 8 3 2 1
 4 27 8 4 2 1
 4 27 9 1 1 1
 4 27 9 2 1 1
 4 27 9 3 1 1
 4 27 9 4 1 1
 4 27 10 1 2 1
 4 27 10 2 1 1
 4 27 10 3 1 1
 4 27 10 4 1 1
 4 27 11 1 1 1
 4 27 11 2 2 1
 4 27 11 3 2 1
 4 27 11 4 1 1
 4 27 12 1 1 1
 4 27 12 2 2 1
 4 27 12 3 2 1
 4 27 12 4 1 1
 4 27 13 1 1 1
 4 27 13 2 1 1
 4 27 13 3 1 1
 4 27 13 4 2 1
 4 27 14 1 2 1
 4 27 14 2 1 1
 4 27 14 3 2 1
 4 27 14 4 1 1
 4 27 15 1 1 1
 4 27 15 2 2 1
 4 27 15 3 2 1
 4 27 15 4 2 1
 4 27 16 1 1 1
 4 27 16 2 2 1
 4 27 16 3 1 1
 4 27 16 4 2 1
 4 27 17 1 1 1
 4 27 17 2 1 1
 4 27 17 3 2 1
 4 27 17 4 1 1
 4 27 18 1 1 1
 4 27 18 2 1 1
 4 27 18 3 1 1
 4 27 18 4 2 1
 4 27 19 1 1 1
 4 27 19 2 1 1
 4 27 19 3 2 1
 4 27 19 4 1 1
 4 27 20 1 1 1
 4 27 20 2 1 1
 4 27 20 3 1 1
 4 27 20 4 1 1
 4 27 21 1 2 1
 4 27 21 2 1 1
 4 27 21 3 1 1
 4 27 21 4 1 1
 4 27 22 1 1 1
 4 27 22 2 1 1
 4 27 22 3 1 1
 4 27 22 4 2 1
 4 27 23 1 2 1
 4 27 23 2 1 1
 4 27 23 3 1 1
 4 27 23 4 1 1
 4 27 24 1 2 1
 4 27 24 2 1 1
 4 27 24 3 1 1
 4 27 24 4 1 1
 4 27 25 1 1 1
 4 27 25 2 1 1
 4 27 25 3 1 1
 4 27 25 4 1 1
 4 27 26 1 1 1
 4 27 26 2 2 1
 4 27 26 3 1 1
 4 27 26 4 1 1
 4 27 27 1 1 1
 4 27 27 2 1 1
 4 27 27 3 2 1
 4 27 27 4 2 1
 4 27 28 1 2 1
 4 27 28 2 2 1
 4 27 28 3 2 1
 4 27 28 4 1 1
 4 27 29 1 2 1
 4 27 29 2 2 1
 4 27 29 3 1 1
 4 27 29 4 2 1
 4 27 30 1 1 1
 4 27 30 2 2 1
 4 27 30 3 1 1
 4 27 30 4 1 1
 4 27 31 1 1 1
 4 27 31 2 1 1
 4 27 31 3 1 1
 4 27 31 4 1 1
 4 27 32 1 1 1
 4 27 32 2 1 1
 4 27 32 3 1 1
 4 27 32 4 1 1
 4 28 1 1 1 1
 4 28 1 2 1 1
 4 28 1 3 1 1
 4 28 1 4 1 1
 4 28 2 1 1 1
 4 28 2 2 1 1
 4 28 2 3 2 1
 4 28 2 4 2 1
 4 28 3 1 2 1
 4 28 3 2 2 1
 4 28 3 3 2 1
 4 28 3 4 1 1
 4 28 4 1 1 1
 4 28 4 2 2 1
 4 28 4 3 2 1
 4 28 4 4 1 1
 4 28 5 1 2 1
 4 28 5 2 1 1
 4 28 5 3 1 1
 4 28 5 4 2 1
 4 28 6 1 2 1
 4 28 6 2 2 1
 4 28 6 3 2 1
 4 28 6 4 1 1
 4 28 7 1 1 1
 4 28 7 2 1 1
 4 28 7 3 2 1
 4 28 7 4 1 1
 4 28 8 1 2 1
 4 28 8 2 1 1
 4 28 8 3 1 1
 4 28 8 4 1 1
 4 28 9 1 2 1
 4 28 9 2 2 1
 4 28 9 3 2 1
 4 28 9 4 2 1
 4 28 10 1 1 1
 4 28 10 2 1 1
 4 28 10 3 2 1
 4 28 10 4 2 1
 4 28 11 1 2 1
 4 28 11 2 1 1
 4 28 11 3 1 1
 4 28 11 4 1 1
 4 28 12 1 1 1
 4 28 12 2 1 1
 4 28 12 3 1 1
 4 28 12 4 1 1
 4 28 13 1 1 1
 4 28 13 2 2 1
 4 28 13 3 1 1
 4 28 13 4 1 1
 4 28 14 1 1 1
 4 28 14 2 2 1
 4 28 14 3 1 1
 4 28 14 4 1 1
 4 28 15 1 1 1
 4 28 15 2 1 1
 4 28 15 3 2 1
 4 28 15 4 2 1
 4 28 16 1 1 1
 4 28 16 2 1 1
 4 28 16 3 1 1
 4 28 16 4 1 1
 4 28 17 1 1 1
 4 28 17 2 1 1
 4 28 17 3 1 1
 4 28 17 4 2 1
 4 28 18 1 1 1
 4 28 18 2 2 1
 4 28 18 3 1 1
 4 28 18 4 1 1
 4 28 19 1 1 1
 4 28 19 2 1 1
 4 28 19 3 1 1
 4 28 19 4 1 1
 4 28 20 1 2 1
 4 28 20 2 1 1
 4 28 20 3 2 1
 4 28 20 4 2 1
 4 28 21 1 1 1
 4 28 21 2 2 1
 4 28 21 3 1 1
 4 28 21 4 2 1
 4 28 22 1 1 1
 4 28 22 2 2 1
 4 28 22 3 1 1
 4 28 22 4 1 1
 4 28 23 1 2 1
 4 28 23 2 2 1
 4 28 23 3 2 1
 4 28 23 4 1 1
 4 28 24 1 1 1
 4 28 24 2 1 1
 4 28 24 3 1 1
 4 28 24 4 1 1
 4 28 25 1 1 1
 4 28 25 2 2 1
 4 28 25 3 1 1
 4 28 25 4 2 1
 4 28 26 1 1 1
 4 28 26 2 2 1
 4 28 26 3 2 1
 4 28 26 4 1 1
 4 28 27 1 1 1
 4 28 27 2 1 1
 4 28 27 3 1 1
 4 28 27 4 2 1
 4 28 28 1 2 1
 4 28 28 2 2 1
 4 28 28 3 1 1
 4 28 28 4 1 1
 4 28 29 1 1 1
 4 28 29 2 1 1
 4 28 29 3 1 1
 4 28 29 4 1 1
 4 28 30 1 1 1
 4 28 30 2 1 1
 4 28 30 3 1 1
 4 28 30 4 1 1
 4 28 31 1 2 1
 4 28 31 2 1 1
 4 28 31 3 2 1
 4 28 31 4 1 1
 4 28 32 1 2 1
 4 28 32 2 1 1
 4 28 32 3 1 1
 4 28 32 4 1 1
 4 29 1 1 1 1
 4 29 1 2 2 1
 4 29 1 3 2 1
 4 29 1 4 1 1
 4 29 2 1 1 1
 4 29 2 2 1 1
 4 29 2 3 1 1
 4 29 2 4 1 1
 4 29 3 1 1 1
 4 29 3 2 1 1
 4 29 3 3 1 1
 4 29 3 4 2 1
 4 29 4 1 2 1
 4 29 4 2 1 1
 4 29 4 3 1 1
 4 29 4 4 1 1
 4 29 5 1 1 1
 4 29 5 2 2 1
 4 29 5 3 1 1
 4 29 5 4 1 1
 4 29 6 1 2 1
 4 29 6 2 1 1
 4 29 6 3 1 1
 4 29 6 4 2 1
 4 29 7 1 2 1
 4 29 7 2 2 1
 4 29 7 3 1 1
 4 29 7 4 1 1
 4 29 8 1 1 1
 4 29 8 2 1 1
 4 29 8 3 2 1
 4 29 8 4 1 1
 4 29 9 1 1 1
 4 29 9 2 2 1
 4 29 9 3 1 1
 4 29 9 4 1 1
 4 29 10 1 1 1
 4 29 10 2 1 1
 4 29 10 3 1 1
 4 29 10 4 2 1
 4 29 11 1 2 1
 4 29 11 2 1 1
 4 29 11 3 1 1
 4 29 11 4 1 1
 4 29 12 1 1 1
 4 29 12 2 1 1
 4 29 12 3 2 1
 4 29 12 4 1 1
 4 29 13 1 2 1
 4 29 13 2 1 1
 4 29 13 3 2 1
 4 29 13 4 2 1
 4 29 14 1 1 1
 4 29 14 2 1 1
 4 29 14 3 1 1
 4 29 14 4 1 1
 4 29 15 1 1 1
 4 29 15 2 1 1
 4 29 15 3 1 1
 4 29 15 4 2 1
 4 29 16 1 1 1
 4 29 16 2 2 1
 4 29 16 3 1 1
 4 29 16 4 1 1
 4 29 17 1 2 1
 4 29 17 2 1 1
 4 29 17 3 1 1
 4 29 17 4 1 1
 4 29 18 1 1 1
 4 29 18 2 1 1
 4 29 18 3 1 1
 4 29 18 4 1 1
 4 29 19 1 1 1
 4 29 19 2 2 1
 4 29 19 3 1 1
 4 29 19 4 1 1
 4 29 20 1 2 1
 4 29 20 2 1 1
 4 29 20 3 2 1
 4 29 20 4 1 1
 4 29 21 1 1 1
 4 29 21 2 1 1
 4 29 21 3 1 1
 4 29 21 4 2 1
 4 29 22 1 1 1
 4 29 22 2 1 1
 4 29 22 3 1 1
 4 29 22 4 2 1
 4 29 23 1 1 1
 4 29 23 2 2 1
 4 29 23 3 2 1
 4 29 23 4 1 1
 4 29 24 1 2 1
 4 29 24 2 1 1
 4 29 24 3 1 1
 4 29 24 4 1 1
 4 29 25 1 2 1
 4 29 25 2 2 1
 4 29 25 3 2 1
 4 29 25 4 2 1
 4 29 26 1 1 1
 4 29 26 2 1 1
 4 29 26 3 1 1
 4 29 26 4 2 1
 4 29 27 1 1 1
 4 29 27 2 2 1
 4 29 27 3 2 1
 4 29 27 4 2 1
 4 29 28 1 1 1
 4 29 28 2 1 1
 4 29 28 3 1 1
 4 29 28 4 1 1
 4 29 29 1 1 1
 4 29 29 2 1 1
 4 29 29 3 1 1
 4 29 29 4 2 1
 4 29 30 1 1 1
 4 29 30 2 1 1
 4 29 30 3 1 1
 4 29 30 4 1 1
 4 29 31 1 1 1
 4 29 31 2 2 1
 4 29 31 3 2 1
 4 29 31 4 1 1
 4 29 32 1 2 1
 4 29 32 2 1 1
 4 29 32 3 1 1
 4 29 32 4 1 1
 4 30 1 1 1 1
 4 30 1 2 1 1
 4 30 1 3 1 1
 4 30 1 4 2 1
 4 30 2 1 1 1
 4 30 2 2 1 1
 4 30 2 3 1 1
 4 30 2 4 1 1
 4 30 3 1 1 1
 4 30 3 2 2 1
 4 30 3 3 2 1
 4 30 3 4 2 1
 4 30 4 1 1 1
 4 30 4 2 1 1
 4 30 4 3 2 1
 4 30 4 4 2 1
 4 30 5 1 1 1
 4 30 5 2 1 1
 4 30 5 3 1 1
 4 30 5 4 2 1
 4 30 6 1 1 1
 4 30 6 2 1 1
 4 30 6 3 2 1
 4 30 6 4 1 1
 4 30 7 1 2 1
 4 30 7 2 2 1
 4 30 7 3 1 1
 4 30 7 4 2 1
 4 30 8 1 1 1
 4 30 8 2 1 1
 4 30 8 3 1 1
 4 30 8 4 1 1
 4 30 9 1 1 1
 4 30 9 2 1 1
 4 30 9 3 1 1
 4 30 9 4 1 1
 4 30 10 1 1 1
 4 30 10 2 1 1
 4 30 10 3 1 1
 4 30 10 4 1 1
 4 30 11 1 1 1
 4 30 11 2 1 1
 4 30 11 3 1 1
 4 30 11 4 1 1
 4 30 12 1 1 1
 4 30 12 2 1 1
 4 30 12 3 1 1
 4 30 12 4 2 1
 4 30 13 1 2 1
 4 30 13 2 1 1
 4 30 13 3 1 1
 4 30 13 4 1 1
 4 30 14 1 1 1
 4 30 14 2 1 1
 4 30 14 3 1 1
 4 30 14 4 2 1
 4 30 15 1 1 1
 4 30 15 2 1 1
 4 30 15 3 2 1
 4 30 15 4 1 1
 4 30 16 1 2 1
 4 30 16 2 1 1
 4 30 16 3 2 1
 4 30 16 4 1 1
 4 30 17 1 1 1
 4 30 17 2 1 1
 4 30 17 3 1 1
 4 30 17 4 1 1
 4 30 18 1 1 1
 4 30 18 2 1 1
 4 30 18 3 1 1
 4 30 18 4 2 1
 4 30 19 1 2 1
 4 30 19 2 1 1
 4 30 19 3 1 1
 4 30 19 4 2 1
 4 30 20 1 1 1
 4 30 20 2 1 1
 4 30 20 3 1 1
 4 30 20 4 2 1
 4 30 21 1 1 1
 4 30 21 2 1 1
 4 30 21 3 1 1
 4 30 21 4 2 1
 4 30 22 1 1 1
 4 30 22 2 1 1
 4 30 22 3 1 1
 4 30 22 4 2 1
 4 30 23 1 1 1
 4 30 23 2 1 1
 4 30 23 3 1 1
 4 30 23 4 2 1
 4 30 24 1 1 1
 4 30 24 2 1 1
 4 30 24 3 1 1
 4 30 24 4 1 1
 4 30 25 1 1 1
 4 30 25 2 1 1
 4 30 25 3 1 1
 4 30 25 4 2 1
 4 30 26 1 1 1
 4 30 26 2 1 1
 4 30 26 3 2 1
 4 30 26 4 1 1
 4 30 27 1 1 1
 4 30 27 2 1 1
 4 30 27 3 1 1
 4 30 27 4 1 1
 4 30 28 1 1 1
 4 30 28 2 1 1
 4 30 28 3 1 1
 4 30 28 4 1 1
 4 30 29 1 1 1
 4 30 29 2 1 1
 4 30 29 3 1 1
 4 30 29 4 1 1
 4 30 30 1 1 1
 4 30 30 2 1 1
 4 30 30 3 1 1
 4 30 30 4 2 1
 4 30 31 1 1 1
 4 30 31 2 1 1
 4 30 31 3 1 1
 4 30 31 4 1 1
 4 30 32 1 2 1
 4 30 32 2 2 1
 4 30 32 3 2 1
 4 30 32 4 1 1
 4 31 1 1 1 1
 4 31 1 2 1 1
 4 31 1 3 1 1
 4 31 1 4 2 1
 4 31 2 1 2 1
 4 31 2 2 1 1
 4 31 2 3 1 1
 4 31 2 4 1 1
 4 31 3 1 1 1
 4 31 3 2 1 1
 4 31 3 3 1 1
 4 31 3 4 2 1
 4 31 4 1 1 1
 4 31 4 2 1 1
 4 31 4 3 1 1
 4 31 4 4 2 1
 4 31 5 1 2 1
 4 31 5 2 2 1
 4 31 5 3 1 1
 4 31 5 4 2 1
 4 31 6 1 1 1
 4 31 6 2 1 1
 4 31 6 3 2 1
 4 31 6 4 1 1
 4 31 7 1 2 1
 4 31 7 2 1 1
 4 31 7 3 2 1
 4 31 7 4 1 1
 4 31 8 1 1 1
 4 31 8 2 2 1
 4 31 8 3 2 1
 4 31 8 4 2 1
 4 31 9 1 2 1
 4 31 9 2 2 1
 4 31 9 3 1 1
 4 31 9 4 1 1
 4 31 10 1 2 1
 4 31 10 2 2 1
 4 31 10 3 1 1
 4 31 10 4 1 1
 4 31 11 1 1 1
 4 31 11 2 2 1
 4 31 11 3 1 1
 4 31 11 4 1 1
 4 31 12 1 2 1
 4 31 12 2 1 1
 4 31 12 3 2 1
 4 31 12 4 1 1
 4 31 13 1 2 1
 4 31 13 2 1 1
 4 31 13 3 1 1
 4 31 13 4 2 1
 4 31 14 1 1 1
 4 31 14 2 2 1
 4 31 14 3 1 1
 4 31 14 4 1 1
 4 31 15 1 2 1
 4 31 15 2 1 1
 4 31 15 3 1 1
 4 31 15 4 1 1
 4 31 16 1 1 1
 4 31 16 2 1 1
 4 31 16 3 1 1
 4 31 16 4 2 1
 4 31 17 1 1 1
 4 31 17 2 1 1
 4 31 17 3 1 1
 4 31 17 4 1 1
 4 31 18 1 2 1
 4 31 18 2 2 1
 4 31 18 3 1 1
 4 31 18 4 1 1
 4 31 19 1 1 1
 4 31 19 2 1 1
 4 31 19 3 1 1
 4 31 19 4 2 1
 4 31 20 1 1 1
 4 31 20 2 1 1
 4 31 20 3 2 1
 4 31 20 4 1 1
 4 31 21 1 1 1
 4 31 21 2 1 1
 4 31 21 3 1 1
 4 31 21 4 2 1
 4 31 22 1 1 1
 4 31 22 2 1 1
 4 31 22 3 1 1
 4 31 22 4 1 1
 4 31 23 1 1 1
 4 31 23 2 2 1
 4 31 23 3 1 1
 4 31 23 4 1 1
 4 31 24 1 2 1
 4 31 24 2 1 1
 4 31 24 3 1 1
 4 31 24 4 1 1
 4 31 25 1 1 1
 4 31 25 2 2 1
 4 31 25 3 1 1
 4 31 25 4 1 1
 4 31 26 1 2 1
 4 31 26 2 2 1
 4 31 26 3 1 1
 4 31 26 4 2 1
 4 31 27 1 1 1
 4 31 27 2 2 1
 4 31 27 3 1 1
 4 31 27 4 1 1
 4 31 28 1 2 1
 4 31 28 2 1 1
 4 31 28 3 2 1
 4 31 28 4 1 1
 4 31 29 1 1 1
 4 31 29 2 1 1
 4 31 29 3 1 1
 4 31 29 4 1 1
 4 31 30 1 1 1
 4 31 30 2 2 1
 4 31 30 3 1 1
 4 31 30 4 1 1
 4 31 31 1 1 1
 4 31 31 2 1 1
 4 31 31 3 1 1
 4 31 31 4 1 1
 4 31 32 1 1 1
 4 31 32 2 1 1
 4 31 32 3 1 1
 4 31 32 4 1 1
 4 32 1 1 1 1
 4 32 1 2 1 1
 4 32 1 3 2 1
 4 32 1 4 1 1
 4 32 2 1 2 1
 4 32 2 2 1 1
 4 32 2 3 2 1
 4 32 2 4 1 1
 4 32 3 1 1 1
 4 32 3 2 1 1
 4 32 3 3 1 1
 4 32 3 4 1 1
 4 32 4 1 2 1
 4 32 4 2 1 1
 4 32 4 3 1 1
 4 32 4 4 2 1
 4 32 5 1 1 1
 4 32 5 2 1 1
 4 32 5 3 2 1
 4 32 5 4 2 1
 4 32 6 1 2 1
 4 32 6 2 2 1
 4 32 6 3 1 1
 4 32 6 4 1 1
 4 32 7 1 2 1
 4 32 7 2 2 1
 4 32 7 3 2 1
 4 32 7 4 2 1
 4 32 8 1 1 1
 4 32 8 2 1 1
 4 32 8 3 2 1
 4 32 8 4 1 1
 4 32 9 1 1 1
 4 32 9 2 2 1
 4 32 9 3 2 1
 4 32 9 4 2 1
 4 32 10 1 1 1
 4 32 10 2 1 1
 4 32 10 3 1 1
 4 32 10 4 1 1
 4 32 11 1 1 1
 4 32 11 2 2 1
 4 32 11 3 1 1
 4 32 11 4 1 1
 4 32 12 1 1 1
 4 32 12 2 1 1
 4 32 12 3 2 1
 4 32 12 4 1 1
 4 32 13 1 1 1
 4 32 13 2 1 1
 4 32 13 3 1 1
 4 32 13 4 2 1
 4 32 14 1 1 1
 4 32 14 2 2 1
 4 32 14 3 1 1
 4 32 14 4 1 1
 4 32 15 1 1 1
 4 32 15 2 1 1
 4 32 15 3 1 1
 4 32 15 4 1 1
 4 32 16 1 1 1
 4 32 16 2 1 1
 4 32 16 3 1 1
 4 32 16 4 1 1
 4 32 17 1 1 1
 4 32 17 2 1 1
 4 32 17 3 1 1
 4 32 17 4 1 1
 4 32 18 1 1 1
 4 32 18 2 2 1
 4 32 18 3 2 1
 4 32 18 4 1 1
 4 32 19 1 1 1
 4 32 19 2 1 1
 4 32 19 3 2 1
 4 32 19 4 1 1
 4 32 20 1 1 1
 4 32 20 2 2 1
 4 32 20 3 2 1
 4 32 20 4 1 1
 4 32 21 1 1 1
 4 32 21 2 1 1
 4 32 21 3 2 1
 4 32 21 4 1 1
 4 32 22 1 2 1
 4 32 22 2 1 1
 4 32 22 3 1 1
 4 32 22 4 1 1
 4 32 23 1 1 1
 4 32 23 2 2 1
 4 32 23 3 1 1
 4 32 23 4 1 1
 4 32 24 1 1 1
 4 32 24 2 2 1
 4 32 24 3 2 1
 4 32 24 4 2 1
 4 32 25 1 1 1
 4 32 25 2 1 1
 4 32 25 3 1 1
 4 32 25 4 2 1
 4 32 26 1 1 1
 4 32 26 2 1 1
 4 32 26 3 1 1
 4 32 26 4 1 1
 4 32 27 1 1 1
 4 32 27 2 2 1
 4 32 27 3 2 1
 4 32 27 4 1 1
 4 32 28 1 2 1
 4 32 28 2 2 1
 4 32 28 3 1 1
 4 32 28 4 1 1
 4 32 29 1 2 1
 4 32 29 2 1 1
 4 32 29 3 2 1
 4 32 29 4 1 1
 4 32 30 1 2 1
 4 32 30 2 1 1
 4 32 30 3 1 1
 4 32 30 4 2 1
 4 32 31 1 1 1
 4 32 31 2 2 1
 4 32 31 3 2 1
 4 32 31 4 2 1
 4 32 32 1 1 1
 4 32 32 2 1 1
 4 32 32 3 1 1
 4 32 32 4 1 1
 5 1 1 1 1 1
 5 1 1 2 2 1
 5 1 1 3 2 1
 5 1 1 4 2 1
 5 1 2 1 1 1
 5 1 2 2 1 1
 5 1 2 3 1 1
 5 1 2 4 2 1
 5 1 3 1 1 1
 5 1 3 2 2 1
 5 1 3 3 1 1
 5 1 3 4 2 1
 5 1 4 1 1 1
 5 1 4 2 1 1
 5 1 4 3 1 1
 5 1 4 4 1 1
 5 1 5 1 2 1
 5 1 5 2 2 1
 5 1 5 3 1 1
 5 1 5 4 1 1
 5 1 6 1 1 1
 5 1 6 2 1 1
 5 1 6 3 2 1
 5 1 6 4 1 1
 5 1 7 1 1 1
 5 1 7 2 2 1
 5 1 7 3 1 1
 5 1 7 4 1 1
 5 1 8 1 1 1
 5 1 8 2 1 1
 5 1 8 3 1 1
 5 1 8 4 2 1
 5 1 9 1 1 1
 5 1 9 2 2 1
 5 1 9 3 1 1
 5 1 9 4 1 1
 5 1 10 1 1 1
 5 1 10 2 1 1
 5 1 10 3 1 1
 5 1 10 4 2 1
 5 1 11 1 1 1
 5 1 11 2 1 1
 5 1 11 3 2 1
 5 1 11 4 2 1
 5 1 12 1 2 1
 5 1 12 2 1 1
 5 1 12 3 1 1
 5 1 12 4 1 1
 5 1 13 1 1 1
 5 1 13 2 2 1
 5 1 13 3 2 1
 5 1 13 4 2 1
 5 1 14 1 2 1
 5 1 14 2 1 1
 5 1 14 3 1 1
 5 1 14 4 1 1
 5 1 15 1 1 1
 5 1 15 2 2 1
 5 1 15 3 2 1
 5 1 15 4 1 1
 5 1 16 1 1 1
 5 1 16 2 1 1
 5 1 16 3 1 1
 5 1 16 4 1 1
 5 1 17 1 1 1
 5 1 17 2 1 1
 5 1 17 3 1 1
 5 1 17 4 1 1
 5 1 18 1 1 1
 5 1 18 2 2 1
 5 1 18 3 1 1
 5 1 18 4 1 1
 5 1 19 1 2 1
 5 1 19 2 1 1
 5 1 19 3 1 1
 5 1 19 4 2 1
 5 1 20 1 2 1
 5 1 20 2 1 1
 5 1 20 3 1 1
 5 1 20 4 1 1
 5 1 21 1 1 1
 5 1 21 2 2 1
 5 1 21 3 1 1
 5 1 21 4 1 1
 5 1 22 1 1 1
 5 1 22 2 1 1
 5 1 22 3 2 1
 5 1 22 4 1 1
 5 1 23 1 1 1
 5 1 23 2 1 1
 5 1 23 3 1 1
 5 1 23 4 1 1
 5 1 24 1 2 1
 5 1 24 2 2 1
 5 1 24 3 1 1
 5 1 24 4 2 1
 5 1 25 1 1 1
 5 1 25 2 1 1
 5 1 25 3 2 1
 5 1 25 4 1 1
 5 1 26 1 2 1
 5 1 26 2 1 1
 5 1 26 3 1 1
 5 1 26 4 2 1
 5 1 27 1 2 1
 5 1 27 2 1 1
 5 1 27 3 1 1
 5 1 27 4 1 1
 5 1 28 1 1 1
 5 1 28 2 1 1
 5 1 28 3 1 1
 5 1 28 4 1 1
 5 1 29 1 2 1
 5 1 29 2 2 1
 5 1 29 3 1 1
 5 1 29 4 1 1
 5 1 30 1 1 1
 5 1 30 2 1 1
 5 1 30 3 1 1
 5 1 30 4 2 1
 5 1 31 1 1 1
 5 1 31 2 2 1
 5 1 31 3 1 1
 5 1 31 4 1 1
 5 1 32 1 1 1
 5 1 32 2 1 1
 5 1 32 3 2 1
 5 1 32 4 1 1
 5 2 1 1 2 1
 5 2 1 2 1 1
 5 2 1 3 1 1
 5 2 1 4 1 1
 5 2 2 1 1 1
 5 2 2 2 2 1
 5 2 2 3 2 1
 5 2 2 4 2 1
 5 2 3 1 1 1
 5 2 3 2 2 1
 5 2 3 3 1 1
 5 2 3 4 2 1
 5 2 4 1 1 1
 5 2 4 2 2 1
 5 2 4 3 1 1
 5 2 4 4 1 1
 5 2 5 1 1 1
 5 2 5 2 1 1
 5 2 5 3 1 1
 5 2 5 4 2 1
 5 2 6 1 2 1
 5 2 6 2 2 1
 5 2 6 3 1 1
 5 2 6 4 1 1
 5 2 7 1 1 1
 5 2 7 2 1 1
 5 2 7 3 2 1
 5 2 7 4 1 1
 5 2 8 1 1 1
 5 2 8 2 1 1
 5 2 8 3 1 1
 5 2 8 4 1 1
 5 2 9 1 1 1
 5 2 9 2 1 1
 5 2 9 3 1 1
 5 2 9 4 1 1
 5 2 10 1 2 1
 5 2 10 2 2 1
 5 2 10 3 1 1
 5 2 10 4 2 1
 5 2 11 1 1 1
 5 2 11 2 2 1
 5 2 11 3 2 1
 5 2 11 4 2 1
 5 2 12 1 2 1
 5 2 12 2 1 1
 5 2 12 3 1 1
 5 2 12 4 1 1
 5 2 13 1 2 1
 5 2 13 2 2 1
 5 2 13 3 1 1
 5 2 13 4 1 1
 5 2 14 1 1 1
 5 2 14 2 2 1
 5 2 14 3 1 1
 5 2 14 4 2 1
 5 2 15 1 1 1
 5 2 15 2 1 1
 5 2 15 3 2 1
 5 2 15 4 1 1
 5 2 16 1 1 1
 5 2 16 2 1 1
 5 2 16 3 1 1
 5 2 16 4 2 1
 5 2 17 1 1 1
 5 2 17 2 1 1
 5 2 17 3 1 1
 5 2 17 4 2 1
 5 2 18 1 1 1
 5 2 18 2 1 1
 5 2 18 3 1 1
 5 2 18 4 1 1
 5 2 19 1 2 1
 5 2 19 2 1 1
 5 2 19 3 2 1
 5 2 19 4 1 1
 5 2 20 1 2 1
 5 2 20 2 1 1
 5 2 20 3 2 1
 5 2 20 4 2 1
 5 2 21 1 1 1
 5 2 21 2 1 1
 5 2 21 3 1 1
 5 2 21 4 1 1
 5 2 22 1 2 1
 5 2 22 2 1 1
 5 2 22 3 2 1
 5 2 22 4 1 1
 5 2 23 1 1 1
 5 2 23 2 1 1
 5 2 23 3 1 1
 5 2 23 4 1 1
 5 2 24 1 1 1
 5 2 24 2 2 1
 5 2 24 3 1 1
 5 2 24 4 1 1
 5 2 25 1 1 1
 5 2 25 2 1 1
 5 2 25 3 1 1
 5 2 25 4 1 1
 5 2 26 1 1 1
 5 2 26 2 2 1
 5 2 26 3 1 1
 5 2 26 4 1 1
 5 2 27 1 1 1
 5 2 27 2 1 1
 5 2 27 3 1 1
 5 2 27 4 2 1
 5 2 28 1 1 1
 5 2 28 2 1 1
 5 2 28 3 2 1
 5 2 28 4 1 1
 5 2 29 1 1 1
 5 2 29 2 1 1
 5 2 29 3 1 1
 5 2 29 4 1 1
 5 2 30 1 2 1
 5 2 30 2 1 1
 5 2 30 3 1 1
 5 2 30 4 1 1
 5 2 31 1 2 1
 5 2 31 2 1 1
 5 2 31 3 1 1
 5 2 31 4 1 1
 5 2 32 1 1 1
 5 2 32 2 2 1
 5 2 32 3 1 1
 5 2 32 4 2 1
 5 3 1 1 1 1
 5 3 1 2 1 1
 5 3 1 3 1 1
 5 3 1 4 2 1
 5 3 2 1 2 1
 5 3 2 2 1 1
 5 3 2 3 2 1
 5 3 2 4 1 1
 5 3 3 1 1 1
 5 3 3 2 2 1
 5 3 3 3 1 1
 5 3 3 4 2 1
 5 3 4 1 2 1
 5 3 4 2 2 1
 5 3 4 3 1 1
 5 3 4 4 2 1
 5 3 5 1 2 1
 5 3 5 2 1 1
 5 3 5 3 2 1
 5 3 5 4 1 1
 5 3 6 1 2 1
 5 3 6 2 1 1
 5 3 6 3 1 1
 5 3 6 4 1 1
 5 3 7 1 1 1
 5 3 7 2 1 1
 5 3 7 3 1 1
 5 3 7 4 2 1
 5 3 8 1 1 1
 5 3 8 2 1 1
 5 3 8 3 2 1
 5 3 8 4 2 1
 5 3 9 1 2 1
 5 3 9 2 2 1
 5 3 9 3 2 1
 5 3 9 4 1 1
 5 3 10 1 2 1
 5 3 10 2 2 1
 5 3 10 3 1 1
 5 3 10 4 1 1
 5 3 11 1 1 1
 5 3 11 2 2 1
 5 3 11 3 1 1
 5 3 11 4 2 1
 5 3 12 1 2 1
 5 3 12 2 2 1
 5 3 12 3 2 1
 5 3 12 4 1 1
 5 3 13 1 1 1
 5 3 13 2 1 1
 5 3 13 3 2 1
 5 3 13 4 1 1
 5 3 14 1 1 1
 5 3 14 2 1 1
 5 3 14 3 1 1
 5 3 14 4 2 1
 5 3 15 1 1 1
 5 3 15 2 1 1
 5 3 15 3 1 1
 5 3 15 4 1 1
 5 3 16 1 1 1
 5 3 16 2 1 1
 5 3 16 3 1 1
 5 3 16 4 2 1
 5 3 17 1 1 1
 5 3 17 2 1 1
 5 3 17 3 1 1
 5 3 17 4 1 1
 5 3 18 1 2 1
 5 3 18 2 1 1
 5 3 18 3 1 1
 5 3 18 4 1 1
 5 3 19 1 1 1
 5 3 19 2 1 1
 5 3 19 3 1 1
 5 3 19 4 1 1
 5 3 20 1 2 1
 5 3 20 2 1 1
 5 3 20 3 1 1
 5 3 20 4 1 1
 5 3 21 1 2 1
 5 3 21 2 1 1
 5 3 21 3 1 1
 5 3 21 4 1 1
 5 3 22 1 2 1
 5 3 22 2 2 1
 5 3 22 3 1 1
 5 3 22 4 2 1
 5 3 23 1 1 1
 5 3 23 2 1 1
 5 3 23 3 2 1
 5 3 23 4 2 1
 5 3 24 1 1 1
 5 3 24 2 2 1
 5 3 24 3 2 1
 5 3 24 4 2 1
 5 3 25 1 1 1
 5 3 25 2 1 1
 5 3 25 3 1 1
 5 3 25 4 1 1
 5 3 26 1 1 1
 5 3 26 2 1 1
 5 3 26 3 2 1
 5 3 26 4 1 1
 5 3 27 1 2 1
 5 3 27 2 1 1
 5 3 27 3 1 1
 5 3 27 4 1 1
 5 3 28 1 2 1
 5 3 28 2 2 1
 5 3 28 3 1 1
 5 3 28 4 1 1
 5 3 29 1 2 1
 5 3 29 2 2 1
 5 3 29 3 1 1
 5 3 29 4 1 1
 5 3 30 1 2 1
 5 3 30 2 1 1
 5 3 30 3 2 1
 5 3 30 4 1 1
 5 3 31 1 1 1
 5 3 31 2 2 1
 5 3 31 3 1 1
 5 3 31 4 2 1
 5 3 32 1 2 1
 5 3 32 2 1 1
 5 3 32 3 1 1
 5 3 32 4 1 1
 5 4 1 1 2 1
 5 4 1 2 2 1
 5 4 1 3 2 1
 5 4 1 4 1 1
 5 4 2 1 1 1
 5 4 2 2 2 1
 5 4 2 3 2 1
 5 4 2 4 1 1
 5 4 3 1 2 1
 5 4 3 2 1 1
 5 4 3 3 2 1
 5 4 3 4 2 1
 5 4 4 1 1 1
 5 4 4 2 2 1
 5 4 4 3 2 1
 5 4 4 4 1 1
 5 4 5 1 2 1
 5 4 5 2 1 1
 5 4 5 3 1 1
 5 4 5 4 2 1
 5 4 6 1 1 1
 5 4 6 2 1 1
 5 4 6 3 2 1
 5 4 6 4 1 1
 5 4 7 1 2 1
 5 4 7 2 1 1
 5 4 7 3 1 1
 5 4 7 4 1 1
 5 4 8 1 1 1
 5 4 8 2 1 1
 5 4 8 3 1 1
 5 4 8 4 2 1
 5 4 9 1 1 1
 5 4 9 2 1 1
 5 4 9 3 1 1
 5 4 9 4 1 1
 5 4 10 1 1 1
 5 4 10 2 2 1
 5 4 10 3 1 1
 5 4 10 4 2 1
 5 4 11 1 2 1
 5 4 11 2 1 1
 5 4 11 3 1 1
 5 4 11 4 1 1
 5 4 12 1 2 1
 5 4 12 2 1 1
 5 4 12 3 1 1
 5 4 12 4 1 1
 5 4 13 1 1 1
 5 4 13 2 1 1
 5 4 13 3 2 1
 5 4 13 4 1 1
 5 4 14 1 1 1
 5 4 14 2 1 1
 5 4 14 3 2 1
 5 4 14 4 1 1
 5 4 15 1 1 1
 5 4 15 2 2 1
 5 4 15 3 1 1
 5 4 15 4 2 1
 5 4 16 1 1 1
 5 4 16 2 1 1
 5 4 16 3 1 1
 5 4 16 4 2 1
 5 4 17 1 2 1
 5 4 17 2 1 1
 5 4 17 3 1 1
 5 4 17 4 2 1
 5 4 18 1 1 1
 5 4 18 2 1 1
 5 4 18 3 1 1
 5 4 18 4 1 1
 5 4 19 1 2 1
 5 4 19 2 2 1
 5 4 19 3 1 1
 5 4 19 4 1 1
 5 4 20 1 1 1
 5 4 20 2 1 1
 5 4 20 3 1 1
 5 4 20 4 2 1
 5 4 21 1 1 1
 5 4 21 2 1 1
 5 4 21 3 2 1
 5 4 21 4 1 1
 5 4 22 1 1 1
 5 4 22 2 1 1
 5 4 22 3 1 1
 5 4 22 4 1 1
 5 4 23 1 2 1
 5 4 23 2 1 1
 5 4 23 3 2 1
 5 4 23 4 1 1
 5 4 24 1 1 1
 5 4 24 2 2 1
 5 4 24 3 1 1
 5 4 24 4 2 1
 5 4 25 1 2 1
 5 4 25 2 1 1
 5 4 25 3 2 1
 5 4 25 4 1 1
 5 4 26 1 1 1
 5 4 26 2 1 1
 5 4 26 3 1 1
 5 4 26 4 1 1
 5 4 27 1 1 1
 5 4 27 2 2 1
 5 4 27 3 2 1
 5 4 27 4 2 1
 5 4 28 1 1 1
 5 4 28 2 1 1
 5 4 28 3 1 1
 5 4 28 4 1 1
 5 4 29 1 1 1
 5 4 29 2 1 1
 5 4 29 3 1 1
 5 4 29 4 1 1
 5 4 30 1 1 1
 5 4 30 2 1 1
 5 4 30 3 2 1
 5 4 30 4 2 1
 5 4 31 1 1 1
 5 4 31 2 2 1
 5 4 31 3 1 1
 5 4 31 4 1 1
 5 4 32 1 1 1
 5 4 32 2 1 1
 5 4 32 3 1 1
 5 4 32 4 2 1
 5 5 1 1 2 1
 5 5 1 2 1 1
 5 5 1 3 1 1
 5 5 1 4 1 1
 5 5 2 1 1 1
 5 5 2 2 1 1
 5 5 2 3 1 1
 5 5 2 4 1 1
 5 5 3 1 1 1
 5 5 3 2 1 1
 5 5 3 3 2 1
 5 5 3 4 1 1
 5 5 4 1 1 1
 5 5 4 2 1 1
 5 5 4 3 1 1
 5 5 4 4 1 1
 5 5 5 1 2 1
 5 5 5 2 2 1
 5 5 5 3 1 1
 5 5 5 4 2 1
 5 5 6 1 2 1
 5 5 6 2 2 1
 5 5 6 3 1 1
 5 5 6 4 2 1
 5 5 7 1 2 1
 5 5 7 2 2 1
 5 5 7 3 2 1
 5 5 7 4 1 1
 5 5 8 1 1 1
 5 5 8 2 1 1
 5 5 8 3 2 1
 5 5 8 4 1 1
 5 5 9 1 2 1
 5 5 9 2 1 1
 5 5 9 3 2 1
 5 5 9 4 1 1
 5 5 10 1 1 1
 5 5 10 2 2 1
 5 5 10 3 1 1
 5 5 10 4 2 1
 5 5 11 1 1 1
 5 5 11 2 1 1
 5 5 11 3 1 1
 5 5 11 4 1 1
 5 5 12 1 2 1
 5 5 12 2 2 1
 5 5 12 3 2 1
 5 5 12 4 1 1
 5 5 13 1 1 1
 5 5 13 2 2 1
 5 5 13 3 1 1
 5 5 13 4 2 1
 5 5 14 1 1 1
 5 5 14 2 2 1
 5 5 14 3 1 1
 5 5 14 4 1 1
 5 5 15 1 1 1
 5 5 15 2 1 1
 5 5 15 3 1 1
 5 5 15 4 2 1
 5 5 16 1 1 1
 5 5 16 2 1 1
 5 5 16 3 2 1
 5 5 16 4 1 1
 5 5 17 1 2 1
 5 5 17 2 1 1
 5 5 17 3 1 1
 5 5 17 4 1 1
 5 5 18 1 1 1
 5 5 18 2 1 1
 5 5 18 3 1 1
 5 5 18 4 1 1
 5 5 19 1 1 1
 5 5 19 2 1 1
 5 5 19 3 1 1
 5 5 19 4 2 1
 5 5 20 1 1 1
 5 5 20 2 1 1
 5 5 20 3 1 1
 5 5 20 4 2 1
 5 5 21 1 2 1
 5 5 21 2 2 1
 5 5 21 3 2 1
 5 5 21 4 1 1
 5 5 22 1 2 1
 5 5 22 2 2 1
 5 5 22 3 1 1
 5 5 22 4 1 1
 5 5 23 1 2 1
 5 5 23 2 1 1
 5 5 23 3 2 1
 5 5 23 4 1 1
 5 5 24 1 2 1
 5 5 24 2 1 1
 5 5 24 3 1 1
 5 5 24 4 1 1
 5 5 25 1 1 1
 5 5 25 2 1 1
 5 5 25 3 1 1
 5 5 25 4 1 1
 5 5 26 1 1 1
 5 5 26 2 1 1
 5 5 26 3 1 1
 5 5 26 4 1 1
 5 5 27 1 2 1
 5 5 27 2 1 1
 5 5 27 3 1 1
 5 5 27 4 1 1
 5 5 28 1 1 1
 5 5 28 2 1 1
 5 5 28 3 1 1
 5 5 28 4 2 1
 5 5 29 1 1 1
 5 5 29 2 1 1
 5 5 29 3 1 1
 5 5 29 4 1 1
 5 5 30 1 2 1
 5 5 30 2 1 1
 5 5 30 3 2 1
 5 5 30 4 1 1
 5 5 31 1 1 1
 5 5 31 2 1 1
 5 5 31 3 1 1
 5 5 31 4 1 1
 5 5 32 1 2 1
 5 5 32 2 1 1
 5 5 32 3 1 1
 5 5 32 4 1 1
 5 6 1 1 1 1
 5 6 1 2 2 1
 5 6 1 3 1 1
 5 6 1 4 1 1
 5 6 2 1 1 1
 5 6 2 2 1 1
 5 6 2 3 1 1
 5 6 2 4 1 1
 5 6 3 1 2 1
 5 6 3 2 1 1
 5 6 3 3 2 1
 5 6 3 4 1 1
 5 6 4 1 2 1
 5 6 4 2 1 1
 5 6 4 3 1 1
 5 6 4 4 2 1
 5 6 5 1 1 1
 5 6 5 2 1 1
 5 6 5 3 2 1
 5 6 5 4 1 1
 5 6 6 1 1 1
 5 6 6 2 1 1
 5 6 6 3 2 1
 5 6 6 4 1 1
 5 6 7 1 1 1
 5 6 7 2 1 1
 5 6 7 3 1 1
 5 6 7 4 1 1
 5 6 8 1 2 1
 5 6 8 2 1 1
 5 6 8 3 2 1
 5 6 8 4 1 1
 5 6 9 1 1 1
 5 6 9 2 2 1
 5 6 9 3 2 1
 5 6 9 4 1 1
 5 6 10 1 1 1
 5 6 10 2 1 1
 5 6 10 3 2 1
 5 6 10 4 1 1
 5 6 11 1 2 1
 5 6 11 2 2 1
 5 6 11 3 2 1
 5 6 11 4 2 1
 5 6 12 1 1 1
 5 6 12 2 1 1
 5 6 12 3 1 1
 5 6 12 4 1 1
 5 6 13 1 1 1
 5 6 13 2 1 1
 5 6 13 3 2 1
 5 6 13 4 2 1
 5 6 14 1 2 1
 5 6 14 2 1 1
 5 6 14 3 1 1
 5 6 14 4 2 1
 5 6 15 1 2 1
 5 6 15 2 2 1
 5 6 15 3 1 1
 5 6 15 4 2 1
 5 6 16 1 1 1
 5 6 16 2 1 1
 5 6 16 3 2 1
 5 6 16 4 2 1
 5 6 17 1 1 1
 5 6 17 2 1 1
 5 6 17 3 1 1
 5 6 17 4 2 1
 5 6 18 1 1 1
 5 6 18 2 1 1
 5 6 18 3 2 1
 5 6 18 4 1 1
 5 6 19 1 1 1
 5 6 19 2 2 1
 5 6 19 3 2 1
 5 6 19 4 1 1
 5 6 20 1 2 1
 5 6 20 2 1 1
 5 6 20 3 1 1
 5 6 20 4 1 1
 5 6 21 1 1 1
 5 6 21 2 1 1
 5 6 21 3 1 1
 5 6 21 4 2 1
 5 6 22 1 1 1
 5 6 22 2 1 1
 5 6 22 3 1 1
 5 6 22 4 1 1
 5 6 23 1 1 1
 5 6 23 2 2 1
 5 6 23 3 1 1
 5 6 23 4 2 1
 5 6 24 1 1 1
 5 6 24 2 2 1
 5 6 24 3 2 1
 5 6 24 4 1 1
 5 6 25 1 2 1
 5 6 25 2 1 1
 5 6 25 3 1 1
 5 6 25 4 1 1
 5 6 26 1 2 1
 5 6 26 2 1 1
 5 6 26 3 1 1
 5 6 26 4 1 1
 5 6 27 1 1 1
 5 6 27 2 2 1
 5 6 27 3 1 1
 5 6 27 4 1 1
 5 6 28 1 2 1
 5 6 28 2 1 1
 5 6 28 3 1 1
 5 6 28 4 1 1
 5 6 29 1 2 1
 5 6 29 2 2 1
 5 6 29 3 1 1
 5 6 29 4 2 1
 5 6 30 1 1 1
 5 6 30 2 2 1
 5 6 30 3 1 1
 5 6 30 4 2 1
 5 6 31 1 1 1
 5 6 31 2 1 1
 5 6 31 3 1 1
 5 6 31 4 2 1
 5 6 32 1 1 1
 5 6 32 2 1 1
 5 6 32 3 2 1
 5 6 32 4 1 1
 5 7 1 1 1 1
 5 7 1 2 1 1
 5 7 1 3 1 1
 5 7 1 4 1 1
 5 7 2 1 2 1
 5 7 2 2 1 1
 5 7 2 3 1 1
 5 7 2 4 1 1
 5 7 3 1 1 1
 5 7 3 2 2 1
 5 7 3 3 1 1
 5 7 3 4 1 1
 5 7 4 1 1 1
 5 7 4 2 1 1
 5 7 4 3 1 1
 5 7 4 4 2 1
 5 7 5 1 1 1
 5 7 5 2 1 1
 5 7 5 3 2 1
 5 7 5 4 1 1
 5 7 6 1 1 1
 5 7 6 2 1 1
 5 7 6 3 1 1
 5 7 6 4 1 1
 5 7 7 1 2 1
 5 7 7 2 2 1
 5 7 7 3 1 1
 5 7 7 4 1 1
 5 7 8 1 1 1
 5 7 8 2 1 1
 5 7 8 3 1 1
 5 7 8 4 1 1
 5 7 9 1 2 1
 5 7 9 2 1 1
 5 7 9 3 1 1
 5 7 9 4 1 1
 5 7 10 1 1 1
 5 7 10 2 1 1
 5 7 10 3 1 1
 5 7 10 4 1 1
 5 7 11 1 1 1
 5 7 11 2 2 1
 5 7 11 3 1 1
 5 7 11 4 1 1
 5 7 12 1 1 1
 5 7 12 2 1 1
 5 7 12 3 1 1
 5 7 12 4 1 1
 5 7 13 1 1 1
 5 7 13 2 1 1
 5 7 13 3 2 1
 5 7 13 4 1 1
 5 7 14 1 1 1
 5 7 14 2 1 1
 5 7 14 3 2 1
 5 7 14 4 2 1
 5 7 15 1 2 1
 5 7 15 2 1 1
 5 7 15 3 1 1
 5 7 15 4 2 1
 5 7 16 1 1 1
 5 7 16 2 1 1
 5 7 16 3 1 1
 5 7 16 4 2 1
 5 7 17 1 1 1
 5 7 17 2 2 1
 5 7 17 3 1 1
 5 7 17 4 2 1
 5 7 18 1 1 1
 5 7 18 2 2 1
 5 7 18 3 1 1
 5 7 18 4 2 1
 5 7 19 1 2 1
 5 7 19 2 1 1
 5 7 19 3 2 1
 5 7 19 4 1 1
 5 7 20 1 2 1
 5 7 20 2 2 1
 5 7 20 3 2 1
 5 7 20 4 2 1
 5 7 21 1 1 1
 5 7 21 2 1 1
 5 7 21 3 1 1
 5 7 21 4 1 1
 5 7 22 1 1 1
 5 7 22 2 2 1
 5 7 22 3 1 1
 5 7 22 4 1 1
 5 7 23 1 1 1
 5 7 23 2 1 1
 5 7 23 3 1 1
 5 7 23 4 1 1
 5 7 24 1 1 1
 5 7 24 2 2 1
 5 7 24 3 1 1
 5 7 24 4 1 1
 5 7 25 1 1 1
 5 7 25 2 1 1
 5 7 25 3 1 1
 5 7 25 4 1 1
 5 7 26 1 1 1
 5 7 26 2 2 1
 5 7 26 3 1 1
 5 7 26 4 1 1
 5 7 27 1 1 1
 5 7 27 2 1 1
 5 7 27 3 1 1
 5 7 27 4 1 1
 5 7 28 1 1 1
 5 7 28 2 2 1
 5 7 28 3 1 1
 5 7 28 4 1 1
 5 7 29 1 1 1
 5 7 29 2 2 1
 5 7 29 3 1 1
 5 7 29 4 1 1
 5 7 30 1 2 1
 5 7 30 2 2 1
 5 7 30 3 1 1
 5 7 30 4 2 1
 5 7 31 1 2 1
 5 7 31 2 2 1
 5 7 31 3 1 1
 5 7 31 4 1 1
 5 7 32 1 1 1
 5 7 32 2 1 1
 5 7 32 3 1 1
 5 7 32 4 1 1
 5 8 1 1 1 1
 5 8 1 2 1 1
 5 8 1 3 1 1
 5 8 1 4 1 1
 5 8 2 1 1 1
 5 8 2 2 2 1
 5 8 2 3 2 1
 5 8 2 4 1 1
 5 8 3 1 1 1
 5 8 3 2 1 1
 5 8 3 3 1 1
 5 8 3 4 2 1
 5 8 4 1 1 1
 5 8 4 2 1 1
 5 8 4 3 2 1
 5 8 4 4 1 1
 5 8 5 1 2 1
 5 8 5 2 1 1
 5 8 5 3 1 1
 5 8 5 4 1 1
 5 8 6 1 1 1
 5 8 6 2 1 1
 5 8 6 3 2 1
 5 8 6 4 1 1
 5 8 7 1 1 1
 5 8 7 2 2 1
 5 8 7 3 2 1
 5 8 7 4 1 1
 5 8 8 1 2 1
 5 8 8 2 1 1
 5 8 8 3 1 1
 5 8 8 4 1 1
 5 8 9 1 1 1
 5 8 9 2 1 1
 5 8 9 3 1 1
 5 8 9 4 1 1
 5 8 10 1 2 1
 5 8 10 2 1 1
 5 8 10 3 1 1
 5 8 10 4 2 1
 5 8 11 1 1 1
 5 8 11 2 2 1
 5 8 11 3 1 1
 5 8 11 4 1 1
 5 8 12 1 1 1
 5 8 12 2 1 1
 5 8 12 3 1 1
 5 8 12 4 2 1
 5 8 13 1 2 1
 5 8 13 2 1 1
 5 8 13 3 2 1
 5 8 13 4 1 1
 5 8 14 1 1 1
 5 8 14 2 1 1
 5 8 14 3 1 1
 5 8 14 4 1 1
 5 8 15 1 2 1
 5 8 15 2 1 1
 5 8 15 3 1 1
 5 8 15 4 1 1
 5 8 16 1 2 1
 5 8 16 2 1 1
 5 8 16 3 2 1
 5 8 16 4 1 1
 5 8 17 1 1 1
 5 8 17 2 2 1
 5 8 17 3 1 1
 5 8 17 4 2 1
 5 8 18 1 2 1
 5 8 18 2 1 1
 5 8 18 3 2 1
 5 8 18 4 1 1
 5 8 19 1 2 1
 5 8 19 2 2 1
 5 8 19 3 2 1
 5 8 19 4 1 1
 5 8 20 1 2 1
 5 8 20 2 1 1
 5 8 20 3 2 1
 5 8 20 4 1 1
 5 8 21 1 1 1
 5 8 21 2 1 1
 5 8 21 3 1 1
 5 8 21 4 1 1
 5 8 22 1 1 1
 5 8 22 2 1 1
 5 8 22 3 2 1
 5 8 22 4 2 1
 5 8 23 1 1 1
 5 8 23 2 2 1
 5 8 23 3 1 1
 5 8 23 4 1 1
 5 8 24 1 2 1
 5 8 24 2 1 1
 5 8 24 3 1 1
 5 8 24 4 2 1
 5 8 25 1 1 1
 5 8 25 2 1 1
 5 8 25 3 1 1
 5 8 25 4 1 1
 5 8 26 1 1 1
 5 8 26 2 1 1
 5 8 26 3 1 1
 5 8 26 4 1 1
 5 8 27 1 2 1
 5 8 27 2 1 1
 5 8 27 3 1 1
 5 8 27 4 1 1
 5 8 28 1 2 1
 5 8 28 2 2 1
 5 8 28 3 1 1
 5 8 28 4 1 1
 5 8 29 1 1 1
 5 8 29 2 1 1
 5 8 29 3 1 1
 5 8 29 4 1 1
 5 8 30 1 1 1
 5 8 30 2 2 1
 5 8 30 3 1 1
 5 8 30 4 2 1
 5 8 31 1 2 1
 5 8 31 2 2 1
 5 8 31 3 2 1
 5 8 31 4 2 1
 5 8 32 1 1 1
 5 8 32 2 1 1
 5 8 32 3 1 1
 5 8 32 4 1 1
 5 9 1 1 1 1
 5 9 1 2 1 1
 5 9 1 3 2 1
 5 9 1 4 1 1
 5 9 2 1 2 1
 5 9 2 2 1 1
 5 9 2 3 1 1
 5 9 2 4 2 1
 5 9 3 1 2 1
 5 9 3 2 1 1
 5 9 3 3 1 1
 5 9 3 4 1 1
 5 9 4 1 1 1
 5 9 4 2 2 1
 5 9 4 3 1 1
 5 9 4 4 1 1
 5 9 5 1 2 1
 5 9 5 2 1 1
 5 9 5 3 1 1
 5 9 5 4 1 1
 5 9 6 1 1 1
 5 9 6 2 1 1
 5 9 6 3 1 1
 5 9 6 4 1 1
 5 9 7 1 1 1
 5 9 7 2 1 1
 5 9 7 3 2 1
 5 9 7 4 1 1
 5 9 8 1 1 1
 5 9 8 2 1 1
 5 9 8 3 1 1
 5 9 8 4 1 1
 5 9 9 1 1 1
 5 9 9 2 2 1
 5 9 9 3 2 1
 5 9 9 4 1 1
 5 9 10 1 2 1
 5 9 10 2 2 1
 5 9 10 3 2 1
 5 9 10 4 1 1
 5 9 11 1 1 1
 5 9 11 2 1 1
 5 9 11 3 1 1
 5 9 11 4 1 1
 5 9 12 1 1 1
 5 9 12 2 1 1
 5 9 12 3 1 1
 5 9 12 4 1 1
 5 9 13 1 1 1
 5 9 13 2 1 1
 5 9 13 3 1 1
 5 9 13 4 1 1
 5 9 14 1 2 1
 5 9 14 2 2 1
 5 9 14 3 1 1
 5 9 14 4 1 1
 5 9 15 1 1 1
 5 9 15 2 2 1
 5 9 15 3 1 1
 5 9 15 4 1 1
 5 9 16 1 2 1
 5 9 16 2 1 1
 5 9 16 3 1 1
 5 9 16 4 1 1
 5 9 17 1 1 1
 5 9 17 2 1 1
 5 9 17 3 2 1
 5 9 17 4 2 1
 5 9 18 1 1 1
 5 9 18 2 1 1
 5 9 18 3 1 1
 5 9 18 4 2 1
 5 9 19 1 1 1
 5 9 19 2 1 1
 5 9 19 3 1 1
 5 9 19 4 1 1
 5 9 20 1 1 1
 5 9 20 2 1 1
 5 9 20 3 1 1
 5 9 20 4 1 1
 5 9 21 1 1 1
 5 9 21 2 1 1
 5 9 21 3 1 1
 5 9 21 4 1 1
 5 9 22 1 1 1
 5 9 22 2 1 1
 5 9 22 3 2 1
 5 9 22 4 1 1
 5 9 23 1 1 1
 5 9 23 2 1 1
 5 9 23 3 2 1
 5 9 23 4 2 1
 5 9 24 1 1 1
 5 9 24 2 1 1
 5 9 24 3 2 1
 5 9 24 4 2 1
 5 9 25 1 2 1
 5 9 25 2 2 1
 5 9 25 3 1 1
 5 9 25 4 2 1
 5 9 26 1 2 1
 5 9 26 2 1 1
 5 9 26 3 1 1
 5 9 26 4 1 1
 5 9 27 1 1 1
 5 9 27 2 2 1
 5 9 27 3 2 1
 5 9 27 4 1 1
 5 9 28 1 2 1
 5 9 28 2 2 1
 5 9 28 3 1 1
 5 9 28 4 2 1
 5 9 29 1 1 1
 5 9 29 2 1 1
 5 9 29 3 2 1
 5 9 29 4 1 1
 5 9 30 1 1 1
 5 9 30 2 2 1
 5 9 30 3 2 1
 5 9 30 4 2 1
 5 9 31 1 1 1
 5 9 31 2 1 1
 5 9 31 3 2 1
 5 9 31 4 2 1
 5 9 32 1 2 1
 5 9 32 2 1 1
 5 9 32 3 1 1
 5 9 32 4 1 1
 5 10 1 1 1 1
 5 10 1 2 2 1
 5 10 1 3 1 1
 5 10 1 4 1 1
 5 10 2 1 1 1
 5 10 2 2 1 1
 5 10 2 3 1 1
 5 10 2 4 1 1
 5 10 3 1 2 1
 5 10 3 2 1 1
 5 10 3 3 1 1
 5 10 3 4 1 1
 5 10 4 1 1 1
 5 10 4 2 1 1
 5 10 4 3 1 1
 5 10 4 4 2 1
 5 10 5 1 1 1
 5 10 5 2 1 1
 5 10 5 3 1 1
 5 10 5 4 1 1
 5 10 6 1 1 1
 5 10 6 2 1 1
 5 10 6 3 1 1
 5 10 6 4 1 1
 5 10 7 1 1 1
 5 10 7 2 1 1
 5 10 7 3 1 1
 5 10 7 4 2 1
 5 10 8 1 1 1
 5 10 8 2 1 1
 5 10 8 3 1 1
 5 10 8 4 2 1
 5 10 9 1 1 1
 5 10 9 2 1 1
 5 10 9 3 1 1
 5 10 9 4 2 1
 5 10 10 1 2 1
 5 10 10 2 1 1
 5 10 10 3 2 1
 5 10 10 4 2 1
 5 10 11 1 1 1
 5 10 11 2 2 1
 5 10 11 3 1 1
 5 10 11 4 2 1
 5 10 12 1 1 1
 5 10 12 2 2 1
 5 10 12 3 2 1
 5 10 12 4 1 1
 5 10 13 1 1 1
 5 10 13 2 2 1
 5 10 13 3 2 1
 5 10 13 4 1 1
 5 10 14 1 2 1
 5 10 14 2 2 1
 5 10 14 3 2 1
 5 10 14 4 2 1
 5 10 15 1 2 1
 5 10 15 2 1 1
 5 10 15 3 1 1
 5 10 15 4 1 1
 5 10 16 1 1 1
 5 10 16 2 1 1
 5 10 16 3 1 1
 5 10 16 4 1 1
 5 10 17 1 1 1
 5 10 17 2 1 1
 5 10 17 3 2 1
 5 10 17 4 1 1
 5 10 18 1 1 1
 5 10 18 2 1 1
 5 10 18 3 1 1
 5 10 18 4 1 1
 5 10 19 1 1 1
 5 10 19 2 1 1
 5 10 19 3 1 1
 5 10 19 4 1 1
 5 10 20 1 1 1
 5 10 20 2 1 1
 5 10 20 3 2 1
 5 10 20 4 2 1
 5 10 21 1 1 1
 5 10 21 2 1 1
 5 10 21 3 1 1
 5 10 21 4 1 1
 5 10 22 1 1 1
 5 10 22 2 1 1
 5 10 22 3 1 1
 5 10 22 4 2 1
 5 10 23 1 1 1
 5 10 23 2 1 1
 5 10 23 3 1 1
 5 10 23 4 2 1
 5 10 24 1 2 1
 5 10 24 2 2 1
 5 10 24 3 1 1
 5 10 24 4 2 1
 5 10 25 1 1 1
 5 10 25 2 1 1
 5 10 25 3 1 1
 5 10 25 4 1 1
 5 10 26 1 1 1
 5 10 26 2 1 1
 5 10 26 3 1 1
 5 10 26 4 1 1
 5 10 27 1 1 1
 5 10 27 2 1 1
 5 10 27 3 1 1
 5 10 27 4 1 1
 5 10 28 1 1 1
 5 10 28 2 1 1
 5 10 28 3 1 1
 5 10 28 4 1 1
 5 10 29 1 1 1
 5 10 29 2 1 1
 5 10 29 3 1 1
 5 10 29 4 2 1
 5 10 30 1 1 1
 5 10 30 2 1 1
 5 10 30 3 1 1
 5 10 30 4 1 1
 5 10 31 1 1 1
 5 10 31 2 1 1
 5 10 31 3 2 1
 5 10 31 4 2 1
 5 10 32 1 1 1
 5 10 32 2 1 1
 5 10 32 3 1 1
 5 10 32 4 1 1
 5 11 1 1 1 1
 5 11 1 2 1 1
 5 11 1 3 1 1
 5 11 1 4 1 1
 5 11 2 1 1 1
 5 11 2 2 1 1
 5 11 2 3 1 1
 5 11 2 4 1 1
 5 11 3 1 1 1
 5 11 3 2 1 1
 5 11 3 3 1 1
 5 11 3 4 1 1
 5 11 4 1 1 1
 5 11 4 2 1 1
 5 11 4 3 1 1
 5 11 4 4 2 1
 5 11 5 1 1 1
 5 11 5 2 1 1
 5 11 5 3 2 1
 5 11 5 4 2 1
 5 11 6 1 1 1
 5 11 6 2 1 1
 5 11 6 3 1 1
 5 11 6 4 1 1
 5 11 7 1 2 1
 5 11 7 2 1 1
 5 11 7 3 1 1
 5 11 7 4 1 1
 5 11 8 1 2 1
 5 11 8 2 2 1
 5 11 8 3 1 1
 5 11 8 4 1 1
 5 11 9 1 2 1
 5 11 9 2 2 1
 5 11 9 3 2 1
 5 11 9 4 1 1
 5 11 10 1 2 1
 5 11 10 2 1 1
 5 11 10 3 2 1
 5 11 10 4 1 1
 5 11 11 1 2 1
 5 11 11 2 1 1
 5 11 11 3 1 1
 5 11 11 4 1 1
 5 11 12 1 1 1
 5 11 12 2 1 1
 5 11 12 3 1 1
 5 11 12 4 1 1
 5 11 13 1 1 1
 5 11 13 2 1 1
 5 11 13 3 1 1
 5 11 13 4 2 1
 5 11 14 1 1 1
 5 11 14 2 2 1
 5 11 14 3 1 1
 5 11 14 4 2 1
 5 11 15 1 1 1
 5 11 15 2 2 1
 5 11 15 3 1 1
 5 11 15 4 2 1
 5 11 16 1 1 1
 5 11 16 2 1 1
 5 11 16 3 2 1
 5 11 16 4 1 1
 5 11 17 1 1 1
 5 11 17 2 1 1
 5 11 17 3 1 1
 5 11 17 4 2 1
 5 11 18 1 2 1
 5 11 18 2 1 1
 5 11 18 3 1 1
 5 11 18 4 1 1
 5 11 19 1 2 1
 5 11 19 2 1 1
 5 11 19 3 1 1
 5 11 19 4 1 1
 5 11 20 1 2 1
 5 11 20 2 1 1
 5 11 20 3 1 1
 5 11 20 4 1 1
 5 11 21 1 1 1
 5 11 21 2 1 1
 5 11 21 3 1 1
 5 11 21 4 1 1
 5 11 22 1 2 1
 5 11 22 2 1 1
 5 11 22 3 1 1
 5 11 22 4 1 1
 5 11 23 1 1 1
 5 11 23 2 2 1
 5 11 23 3 1 1
 5 11 23 4 1 1
 5 11 24 1 1 1
 5 11 24 2 1 1
 5 11 24 3 1 1
 5 11 24 4 1 1
 5 11 25 1 1 1
 5 11 25 2 2 1
 5 11 25 3 2 1
 5 11 25 4 1 1
 5 11 26 1 2 1
 5 11 26 2 1 1
 5 11 26 3 1 1
 5 11 26 4 1 1
 5 11 27 1 1 1
 5 11 27 2 2 1
 5 11 27 3 2 1
 5 11 27 4 2 1
 5 11 28 1 1 1
 5 11 28 2 2 1
 5 11 28 3 1 1
 5 11 28 4 2 1
 5 11 29 1 2 1
 5 11 29 2 1 1
 5 11 29 3 2 1
 5 11 29 4 1 1
 5 11 30 1 1 1
 5 11 30 2 1 1
 5 11 30 3 1 1
 5 11 30 4 2 1
 5 11 31 1 2 1
 5 11 31 2 1 1
 5 11 31 3 1 1
 5 11 31 4 1 1
 5 11 32 1 1 1
 5 11 32 2 2 1
 5 11 32 3 2 1
 5 11 32 4 1 1
 5 12 1 1 1 1
 5 12 1 2 1 1
 5 12 1 3 2 1
 5 12 1 4 1 1
 5 12 2 1 2 1
 5 12 2 2 1 1
 5 12 2 3 1 1
 5 12 2 4 2 1
 5 12 3 1 2 1
 5 12 3 2 1 1
 5 12 3 3 1 1
 5 12 3 4 1 1
 5 12 4 1 1 1
 5 12 4 2 1 1
 5 12 4 3 1 1
 5 12 4 4 1 1
 5 12 5 1 1 1
 5 12 5 2 1 1
 5 12 5 3 2 1
 5 12 5 4 1 1
 5 12 6 1 1 1
 5 12 6 2 2 1
 5 12 6 3 2 1
 5 12 6 4 1 1
 5 12 7 1 1 1
 5 12 7 2 2 1
 5 12 7 3 1 1
 5 12 7 4 1 1
 5 12 8 1 1 1
 5 12 8 2 1 1
 5 12 8 3 1 1
 5 12 8 4 1 1
 5 12 9 1 2 1
 5 12 9 2 1 1
 5 12 9 3 2 1
 5 12 9 4 1 1
 5 12 10 1 2 1
 5 12 10 2 2 1
 5 12 10 3 1 1
 5 12 10 4 2 1
 5 12 11 1 2 1
 5 12 11 2 1 1
 5 12 11 3 1 1
 5 12 11 4 1 1
 5 12 12 1 1 1
 5 12 12 2 1 1
 5 12 12 3 1 1
 5 12 12 4 1 1
 5 12 13 1 1 1
 5 12 13 2 1 1
 5 12 13 3 1 1
 5 12 13 4 2 1
 5 12 14 1 1 1
 5 12 14 2 1 1
 5 12 14 3 2 1
 5 12 14 4 1 1
 5 12 15 1 1 1
 5 12 15 2 1 1
 5 12 15 3 1 1
 5 12 15 4 1 1
 5 12 16 1 2 1
 5 12 16 2 1 1
 5 12 16 3 1 1
 5 12 16 4 2 1
 5 12 17 1 2 1
 5 12 17 2 1 1
 5 12 17 3 2 1
 5 12 17 4 1 1
 5 12 18 1 2 1
 5 12 18 2 1 1
 5 12 18 3 1 1
 5 12 18 4 2 1
 5 12 19 1 1 1
 5 12 19 2 1 1
 5 12 19 3 2 1
 5 12 19 4 1 1
 5 12 20 1 1 1
 5 12 20 2 2 1
 5 12 20 3 1 1
 5 12 20 4 1 1
 5 12 21 1 1 1
 5 12 21 2 1 1
 5 12 21 3 1 1
 5 12 21 4 2 1
 5 12 22 1 2 1
 5 12 22 2 1 1
 5 12 22 3 2 1
 5 12 22 4 1 1
 5 12 23 1 1 1
 5 12 23 2 1 1
 5 12 23 3 1 1
 5 12 23 4 1 1
 5 12 24 1 1 1
 5 12 24 2 1 1
 5 12 24 3 1 1
 5 12 24 4 2 1
 5 12 25 1 2 1
 5 12 25 2 1 1
 5 12 25 3 1 1
 5 12 25 4 1 1
 5 12 26 1 1 1
 5 12 26 2 1 1
 5 12 26 3 1 1
 5 12 26 4 1 1
 5 12 27 1 1 1
 5 12 27 2 1 1
 5 12 27 3 1 1
 5 12 27 4 1 1
 5 12 28 1 1 1
 5 12 28 2 2 1
 5 12 28 3 1 1
 5 12 28 4 1 1
 5 12 29 1 1 1
 5 12 29 2 1 1
 5 12 29 3 2 1
 5 12 29 4 1 1
 5 12 30 1 2 1
 5 12 30 2 2 1
 5 12 30 3 1 1
 5 12 30 4 1 1
 5 12 31 1 1 1
 5 12 31 2 2 1
 5 12 31 3 1 1
 5 12 31 4 2 1
 5 12 32 1 1 1
 5 12 32 2 1 1
 5 12 32 3 1 1
 5 12 32 4 2 1
 5 13 1 1 1 1
 5 13 1 2 2 1
 5 13 1 3 2 1
 5 13 1 4 1 1
 5 13 2 1 1 1
 5 13 2 2 1 1
 5 13 2 3 2 1
 5 13 2 4 2 1
 5 13 3 1 1 1
 5 13 3 2 2 1
 5 13 3 3 1 1
 5 13 3 4 1 1
 5 13 4 1 2 1
 5 13 4 2 1 1
 5 13 4 3 2 1
 5 13 4 4 1 1
 5 13 5 1 1 1
 5 13 5 2 2 1
 5 13 5 3 2 1
 5 13 5 4 2 1
 5 13 6 1 1 1
 5 13 6 2 1 1
 5 13 6 3 1 1
 5 13 6 4 1 1
 5 13 7 1 1 1
 5 13 7 2 1 1
 5 13 7 3 1 1
 5 13 7 4 1 1
 5 13 8 1 2 1
 5 13 8 2 2 1
 5 13 8 3 1 1
 5 13 8 4 1 1
 5 13 9 1 1 1
 5 13 9 2 1 1
 5 13 9 3 2 1
 5 13 9 4 1 1
 5 13 10 1 1 1
 5 13 10 2 1 1
 5 13 10 3 1 1
 5 13 10 4 1 1
 5 13 11 1 2 1
 5 13 11 2 2 1
 5 13 11 3 1 1
 5 13 11 4 2 1
 5 13 12 1 1 1
 5 13 12 2 1 1
 5 13 12 3 1 1
 5 13 12 4 1 1
 5 13 13 1 1 1
 5 13 13 2 1 1
 5 13 13 3 1 1
 5 13 13 4 1 1
 5 13 14 1 1 1
 5 13 14 2 1 1
 5 13 14 3 1 1
 5 13 14 4 1 1
 5 13 15 1 1 1
 5 13 15 2 1 1
 5 13 15 3 2 1
 5 13 15 4 1 1
 5 13 16 1 1 1
 5 13 16 2 1 1
 5 13 16 3 1 1
 5 13 16 4 1 1
 5 13 17 1 1 1
 5 13 17 2 2 1
 5 13 17 3 1 1
 5 13 17 4 1 1
 5 13 18 1 1 1
 5 13 18 2 2 1
 5 13 18 3 1 1
 5 13 18 4 1 1
 5 13 19 1 1 1
 5 13 19 2 1 1
 5 13 19 3 2 1
 5 13 19 4 1 1
 5 13 20 1 1 1
 5 13 20 2 1 1
 5 13 20 3 1 1
 5 13 20 4 2 1
 5 13 21 1 1 1
 5 13 21 2 1 1
 5 13 21 3 1 1
 5 13 21 4 1 1
 5 13 22 1 1 1
 5 13 22 2 2 1
 5 13 22 3 1 1
 5 13 22 4 1 1
 5 13 23 1 1 1
 5 13 23 2 2 1
 5 13 23 3 2 1
 5 13 23 4 2 1
 5 13 24 1 1 1
 5 13 24 2 1 1
 5 13 24 3 1 1
 5 13 24 4 2 1
 5 13 25 1 1 1
 5 13 25 2 1 1
 5 13 25 3 1 1
 5 13 25 4 1 1
 5 13 26 1 2 1
 5 13 26 2 1 1
 5 13 26 3 1 1
 5 13 26 4 1 1
 5 13 27 1 2 1
 5 13 27 2 1 1
 5 13 27 3 1 1
 5 13 27 4 1 1
 5 13 28 1 1 1
 5 13 28 2 1 1
 5 13 28 3 2 1
 5 13 28 4 1 1
 5 13 29 1 1 1
 5 13 29 2 1 1
 5 13 29 3 1 1
 5 13 29 4 1 1
 5 13 30 1 1 1
 5 13 30 2 1 1
 5 13 30 3 1 1
 5 13 30 4 1 1
 5 13 31 1 2 1
 5 13 31 2 1 1
 5 13 31 3 1 1
 5 13 31 4 1 1
 5 13 32 1 1 1
 5 13 32 2 1 1
 5 13 32 3 1 1
 5 13 32 4 1 1
 5 14 1 1 1 1
 5 14 1 2 2 1
 5 14 1 3 1 1
 5 14 1 4 2 1
 5 14 2 1 1 1
 5 14 2 2 1 1
 5 14 2 3 2 1
 5 14 2 4 1 1
 5 14 3 1 2 1
 5 14 3 2 1 1
 5 14 3 3 1 1
 5 14 3 4 2 1
 5 14 4 1 1 1
 5 14 4 2 1 1
 5 14 4 3 1 1
 5 14 4 4 1 1
 5 14 5 1 1 1
 5 14 5 2 1 1
 5 14 5 3 1 1
 5 14 5 4 1 1
 5 14 6 1 1 1
 5 14 6 2 1 1
 5 14 6 3 2 1
 5 14 6 4 2 1
 5 14 7 1 1 1
 5 14 7 2 2 1
 5 14 7 3 1 1
 5 14 7 4 1 1
 5 14 8 1 1 1
 5 14 8 2 2 1
 5 14 8 3 2 1
 5 14 8 4 1 1
 5 14 9 1 1 1
 5 14 9 2 1 1
 5 14 9 3 1 1
 5 14 9 4 2 1
 5 14 10 1 2 1
 5 14 10 2 1 1
 5 14 10 3 2 1
 5 14 10 4 1 1
 5 14 11 1 1 1
 5 14 11 2 1 1
 5 14 11 3 2 1
 5 14 11 4 1 1
 5 14 12 1 1 1
 5 14 12 2 1 1
 5 14 12 3 1 1
 5 14 12 4 1 1
 5 14 13 1 1 1
 5 14 13 2 1 1
 5 14 13 3 1 1
 5 14 13 4 2 1
 5 14 14 1 1 1
 5 14 14 2 2 1
 5 14 14 3 2 1
 5 14 14 4 2 1
 5 14 15 1 1 1
 5 14 15 2 2 1
 5 14 15 3 1 1
 5 14 15 4 1 1
 5 14 16 1 1 1
 5 14 16 2 1 1
 5 14 16 3 1 1
 5 14 16 4 1 1
 5 14 17 1 1 1
 5 14 17 2 1 1
 5 14 17 3 1 1
 5 14 17 4 1 1
 5 14 18 1 2 1
 5 14 18 2 1 1
 5 14 18 3 1 1
 5 14 18 4 1 1
 5 14 19 1 1 1
 5 14 19 2 1 1
 5 14 19 3 1 1
 5 14 19 4 1 1
 5 14 20 1 2 1
 5 14 20 2 2 1
 5 14 20 3 1 1
 5 14 20 4 2 1
 5 14 21 1 2 1
 5 14 21 2 1 1
 5 14 21 3 1 1
 5 14 21 4 2 1
 5 14 22 1 1 1
 5 14 22 2 1 1
 5 14 22 3 1 1
 5 14 22 4 1 1
 5 14 23 1 1 1
 5 14 23 2 1 1
 5 14 23 3 1 1
 5 14 23 4 2 1
 5 14 24 1 2 1
 5 14 24 2 2 1
 5 14 24 3 1 1
 5 14 24 4 1 1
 5 14 25 1 1 1
 5 14 25 2 2 1
 5 14 25 3 1 1
 5 14 25 4 1 1
 5 14 26 1 1 1
 5 14 26 2 1 1
 5 14 26 3 2 1
 5 14 26 4 2 1
 5 14 27 1 1 1
 5 14 27 2 1 1
 5 14 27 3 1 1
 5 14 27 4 1 1
 5 14 28 1 1 1
 5 14 28 2 1 1
 5 14 28 3 1 1
 5 14 28 4 1 1
 5 14 29 1 1 1
 5 14 29 2 1 1
 5 14 29 3 2 1
 5 14 29 4 1 1
 5 14 30 1 1 1
 5 14 30 2 1 1
 5 14 30 3 1 1
 5 14 30 4 1 1
 5 14 31 1 1 1
 5 14 31 2 2 1
 5 14 31 3 1 1
 5 14 31 4 2 1
 5 14 32 1 2 1
 5 14 32 2 1 1
 5 14 32 3 1 1
 5 14 32 4 2 1
 5 15 1 1 1 1
 5 15 1 2 1 1
 5 15 1 3 1 1
 5 15 1 4 1 1
 5 15 2 1 1 1
 5 15 2 2 2 1
 5 15 2 3 2 1
 5 15 2 4 1 1
 5 15 3 1 1 1
 5 15 3 2 1 1
 5 15 3 3 2 1
 5 15 3 4 1 1
 5 15 4 1 1 1
 5 15 4 2 1 1
 5 15 4 3 1 1
 5 15 4 4 1 1
 5 15 5 1 2 1
 5 15 5 2 2 1
 5 15 5 3 1 1
 5 15 5 4 1 1
 5 15 6 1 2 1
 5 15 6 2 2 1
 5 15 6 3 2 1
 5 15 6 4 1 1
 5 15 7 1 1 1
 5 15 7 2 1 1
 5 15 7 3 1 1
 5 15 7 4 1 1
 5 15 8 1 1 1
 5 15 8 2 1 1
 5 15 8 3 1 1
 5 15 8 4 2 1
 5 15 9 1 1 1
 5 15 9 2 1 1
 5 15 9 3 1 1
 5 15 9 4 2 1
 5 15 10 1 1 1
 5 15 10 2 1 1
 5 15 10 3 2 1
 5 15 10 4 1 1
 5 15 11 1 1 1
 5 15 11 2 1 1
 5 15 11 3 1 1
 5 15 11 4 1 1
 5 15 12 1 2 1
 5 15 12 2 2 1
 5 15 12 3 1 1
 5 15 12 4 1 1
 5 15 13 1 2 1
 5 15 13 2 1 1
 5 15 13 3 2 1
 5 15 13 4 2 1
 5 15 14 1 1 1
 5 15 14 2 2 1
 5 15 14 3 1 1
 5 15 14 4 2 1
 5 15 15 1 1 1
 5 15 15 2 1 1
 5 15 15 3 1 1
 5 15 15 4 1 1
 5 15 16 1 1 1
 5 15 16 2 1 1
 5 15 16 3 2 1
 5 15 16 4 2 1
 5 15 17 1 2 1
 5 15 17 2 1 1
 5 15 17 3 1 1
 5 15 17 4 1 1
 5 15 18 1 1 1
 5 15 18 2 1 1
 5 15 18 3 1 1
 5 15 18 4 1 1
 5 15 19 1 1 1
 5 15 19 2 1 1
 5 15 19 3 2 1
 5 15 19 4 2 1
 5 15 20 1 2 1
 5 15 20 2 1 1
 5 15 20 3 1 1
 5 15 20 4 1 1
 5 15 21 1 1 1
 5 15 21 2 1 1
 5 15 21 3 1 1
 5 15 21 4 1 1
 5 15 22 1 1 1
 5 15 22 2 1 1
 5 15 22 3 1 1
 5 15 22 4 1 1
 5 15 23 1 2 1
 5 15 23 2 1 1
 5 15 23 3 2 1
 5 15 23 4 1 1
 5 15 24 1 1 1
 5 15 24 2 1 1
 5 15 24 3 1 1
 5 15 24 4 2 1
 5 15 25 1 2 1
 5 15 25 2 2 1
 5 15 25 3 2 1
 5 15 25 4 2 1
 5 15 26 1 1 1
 5 15 26 2 1 1
 5 15 26 3 1 1
 5 15 26 4 1 1
 5 15 27 1 1 1
 5 15 27 2 1 1
 5 15 27 3 2 1
 5 15 27 4 2 1
 5 15 28 1 1 1
 5 15 28 2 1 1
 5 15 28 3 1 1
 5 15 28 4 1 1
 5 15 29 1 1 1
 5 15 29 2 1 1
 5 15 29 3 1 1
 5 15 29 4 2 1
 5 15 30 1 1 1
 5 15 30 2 1 1
 5 15 30 3 1 1
 5 15 30 4 1 1
 5 15 31 1 1 1
 5 15 31 2 1 1
 5 15 31 3 2 1
 5 15 31 4 1 1
 5 15 32 1 1 1
 5 15 32 2 1 1
 5 15 32 3 1 1
 5 15 32 4 1 1
 5 16 1 1 1 1
 5 16 1 2 1 1
 5 16 1 3 1 1
 5 16 1 4 2 1
 5 16 2 1 1 1
 5 16 2 2 2 1
 5 16 2 3 1 1
 5 16 2 4 1 1
 5 16 3 1 1 1
 5 16 3 2 1 1
 5 16 3 3 2 1
 5 16 3 4 1 1
 5 16 4 1 1 1
 5 16 4 2 1 1
 5 16 4 3 1 1
 5 16 4 4 2 1
 5 16 5 1 1 1
 5 16 5 2 1 1
 5 16 5 3 1 1
 5 16 5 4 1 1
 5 16 6 1 1 1
 5 16 6 2 1 1
 5 16 6 3 1 1
 5 16 6 4 2 1
 5 16 7 1 2 1
 5 16 7 2 1 1
 5 16 7 3 1 1
 5 16 7 4 1 1
 5 16 8 1 1 1
 5 16 8 2 1 1
 5 16 8 3 1 1
 5 16 8 4 1 1
 5 16 9 1 2 1
 5 16 9 2 2 1
 5 16 9 3 1 1
 5 16 9 4 1 1
 5 16 10 1 2 1
 5 16 10 2 1 1
 5 16 10 3 1 1
 5 16 10 4 1 1
 5 16 11 1 2 1
 5 16 11 2 1 1
 5 16 11 3 1 1
 5 16 11 4 1 1
 5 16 12 1 1 1
 5 16 12 2 1 1
 5 16 12 3 2 1
 5 16 12 4 2 1
 5 16 13 1 2 1
 5 16 13 2 1 1
 5 16 13 3 1 1
 5 16 13 4 2 1
 5 16 14 1 2 1
 5 16 14 2 1 1
 5 16 14 3 1 1
 5 16 14 4 2 1
 5 16 15 1 2 1
 5 16 15 2 2 1
 5 16 15 3 1 1
 5 16 15 4 1 1
 5 16 16 1 2 1
 5 16 16 2 1 1
 5 16 16 3 2 1
 5 16 16 4 2 1
 5 16 17 1 1 1
 5 16 17 2 1 1
 5 16 17 3 2 1
 5 16 17 4 1 1
 5 16 18 1 1 1
 5 16 18 2 1 1
 5 16 18 3 2 1
 5 16 18 4 1 1
 5 16 19 1 2 1
 5 16 19 2 1 1
 5 16 19 3 1 1
 5 16 19 4 1 1
 5 16 20 1 2 1
 5 16 20 2 1 1
 5 16 20 3 1 1
 5 16 20 4 2 1
 5 16 21 1 1 1
 5 16 21 2 1 1
 5 16 21 3 2 1
 5 16 21 4 1 1
 5 16 22 1 2 1
 5 16 22 2 2 1
 5 16 22 3 2 1
 5 16 22 4 1 1
 5 16 23 1 1 1
 5 16 23 2 2 1
 5 16 23 3 2 1
 5 16 23 4 1 1
 5 16 24 1 2 1
 5 16 24 2 1 1
 5 16 24 3 2 1
 5 16 24 4 1 1
 5 16 25 1 1 1
 5 16 25 2 2 1
 5 16 25 3 1 1
 5 16 25 4 1 1
 5 16 26 1 1 1
 5 16 26 2 1 1
 5 16 26 3 1 1
 5 16 26 4 1 1
 5 16 27 1 1 1
 5 16 27 2 2 1
 5 16 27 3 1 1
 5 16 27 4 1 1
 5 16 28 1 2 1
 5 16 28 2 2 1
 5 16 28 3 1 1
 5 16 28 4 2 1
 5 16 29 1 2 1
 5 16 29 2 1 1
 5 16 29 3 1 1
 5 16 29 4 2 1
 5 16 30 1 1 1
 5 16 30 2 1 1
 5 16 30 3 1 1
 5 16 30 4 1 1
 5 16 31 1 2 1
 5 16 31 2 1 1
 5 16 31 3 1 1
 5 16 31 4 2 1
 5 16 32 1 1 1
 5 16 32 2 2 1
 5 16 32 3 2 1
 5 16 32 4 1 1
 5 17 1 1 1 1
 5 17 1 2 1 1
 5 17 1 3 2 1
 5 17 1 4 1 1
 5 17 2 1 1 1
 5 17 2 2 2 1
 5 17 2 3 2 1
 5 17 2 4 1 1
 5 17 3 1 1 1
 5 17 3 2 1 1
 5 17 3 3 2 1
 5 17 3 4 1 1
 5 17 4 1 1 1
 5 17 4 2 1 1
 5 17 4 3 2 1
 5 17 4 4 1 1
 5 17 5 1 1 1
 5 17 5 2 2 1
 5 17 5 3 1 1
 5 17 5 4 1 1
 5 17 6 1 2 1
 5 17 6 2 1 1
 5 17 6 3 1 1
 5 17 6 4 2 1
 5 17 7 1 1 1
 5 17 7 2 1 1
 5 17 7 3 1 1
 5 17 7 4 2 1
 5 17 8 1 2 1
 5 17 8 2 2 1
 5 17 8 3 1 1
 5 17 8 4 2 1
 5 17 9 1 1 1
 5 17 9 2 2 1
 5 17 9 3 1 1
 5 17 9 4 2 1
 5 17 10 1 1 1
 5 17 10 2 2 1
 5 17 10 3 2 1
 5 17 10 4 2 1
 5 17 11 1 1 1
 5 17 11 2 2 1
 5 17 11 3 2 1
 5 17 11 4 2 1
 5 17 12 1 1 1
 5 17 12 2 2 1
 5 17 12 3 1 1
 5 17 12 4 1 1
 5 17 13 1 1 1
 5 17 13 2 1 1
 5 17 13 3 1 1
 5 17 13 4 1 1
 5 17 14 1 2 1
 5 17 14 2 1 1
 5 17 14 3 1 1
 5 17 14 4 1 1
 5 17 15 1 2 1
 5 17 15 2 2 1
 5 17 15 3 2 1
 5 17 15 4 1 1
 5 17 16 1 2 1
 5 17 16 2 2 1
 5 17 16 3 2 1
 5 17 16 4 1 1
 5 17 17 1 2 1
 5 17 17 2 2 1
 5 17 17 3 2 1
 5 17 17 4 1 1
 5 17 18 1 2 1
 5 17 18 2 1 1
 5 17 18 3 1 1
 5 17 18 4 1 1
 5 17 19 1 1 1
 5 17 19 2 2 1
 5 17 19 3 1 1
 5 17 19 4 1 1
 5 17 20 1 2 1
 5 17 20 2 1 1
 5 17 20 3 1 1
 5 17 20 4 2 1
 5 17 21 1 1 1
 5 17 21 2 1 1
 5 17 21 3 1 1
 5 17 21 4 1 1
 5 17 22 1 1 1
 5 17 22 2 1 1
 5 17 22 3 1 1
 5 17 22 4 1 1
 5 17 23 1 1 1
 5 17 23 2 1 1
 5 17 23 3 1 1
 5 17 23 4 2 1
 5 17 24 1 1 1
 5 17 24 2 2 1
 5 17 24 3 2 1
 5 17 24 4 1 1
 5 17 25 1 1 1
 5 17 25 2 2 1
 5 17 25 3 1 1
 5 17 25 4 1 1
 5 17 26 1 1 1
 5 17 26 2 1 1
 5 17 26 3 2 1
 5 17 26 4 1 1
 5 17 27 1 1 1
 5 17 27 2 1 1
 5 17 27 3 2 1
 5 17 27 4 1 1
 5 17 28 1 1 1
 5 17 28 2 1 1
 5 17 28 3 2 1
 5 17 28 4 2 1
 5 17 29 1 1 1
 5 17 29 2 2 1
 5 17 29 3 1 1
 5 17 29 4 1 1
 5 17 30 1 2 1
 5 17 30 2 2 1
 5 17 30 3 2 1
 5 17 30 4 1 1
 5 17 31 1 1 1
 5 17 31 2 1 1
 5 17 31 3 1 1
 5 17 31 4 1 1
 5 17 32 1 1 1
 5 17 32 2 1 1
 5 17 32 3 1 1
 5 17 32 4 1 1
 5 18 1 1 1 1
 5 18 1 2 2 1
 5 18 1 3 1 1
 5 18 1 4 1 1
 5 18 2 1 2 1
 5 18 2 2 2 1
 5 18 2 3 1 1
 5 18 2 4 1 1
 5 18 3 1 2 1
 5 18 3 2 2 1
 5 18 3 3 1 1
 5 18 3 4 1 1
 5 18 4 1 1 1
 5 18 4 2 1 1
 5 18 4 3 1 1
 5 18 4 4 1 1
 5 18 5 1 1 1
 5 18 5 2 1 1
 5 18 5 3 1 1
 5 18 5 4 1 1
 5 18 6 1 1 1
 5 18 6 2 1 1
 5 18 6 3 1 1
 5 18 6 4 1 1
 5 18 7 1 1 1
 5 18 7 2 1 1
 5 18 7 3 1 1
 5 18 7 4 2 1
 5 18 8 1 1 1
 5 18 8 2 2 1
 5 18 8 3 2 1
 5 18 8 4 2 1
 5 18 9 1 2 1
 5 18 9 2 2 1
 5 18 9 3 1 1
 5 18 9 4 2 1
 5 18 10 1 1 1
 5 18 10 2 1 1
 5 18 10 3 1 1
 5 18 10 4 1 1
 5 18 11 1 1 1
 5 18 11 2 1 1
 5 18 11 3 1 1
 5 18 11 4 2 1
 5 18 12 1 1 1
 5 18 12 2 1 1
 5 18 12 3 1 1
 5 18 12 4 1 1
 5 18 13 1 1 1
 5 18 13 2 1 1
 5 18 13 3 1 1
 5 18 13 4 2 1
 5 18 14 1 2 1
 5 18 14 2 1 1
 5 18 14 3 2 1
 5 18 14 4 1 1
 5 18 15 1 2 1
 5 18 15 2 1 1
 5 18 15 3 2 1
 5 18 15 4 1 1
 5 18 16 1 1 1
 5 18 16 2 1 1
 5 18 16 3 1 1
 5 18 16 4 1 1
 5 18 17 1 2 1
 5 18 17 2 1 1
 5 18 17 3 1 1
 5 18 17 4 1 1
 5 18 18 1 2 1
 5 18 18 2 2 1
 5 18 18 3 1 1
 5 18 18 4 1 1
 5 18 19 1 2 1
 5 18 19 2 1 1
 5 18 19 3 1 1
 5 18 19 4 1 1
 5 18 20 1 1 1
 5 18 20 2 1 1
 5 18 20 3 2 1
 5 18 20 4 2 1
 5 18 21 1 1 1
 5 18 21 2 1 1
 5 18 21 3 2 1
 5 18 21 4 1 1
 5 18 22 1 1 1
 5 18 22 2 1 1
 5 18 22 3 1 1
 5 18 22 4 2 1
 5 18 23 1 1 1
 5 18 23 2 1 1
 5 18 23 3 2 1
 5 18 23 4 1 1
 5 18 24 1 1 1
 5 18 24 2 2 1
 5 18 24 3 1 1
 5 18 24 4 2 1
 5 18 25 1 1 1
 5 18 25 2 2 1
 5 18 25 3 1 1
 5 18 25 4 1 1
 5 18 26 1 1 1
 5 18 26 2 1 1
 5 18 26 3 2 1
 5 18 26 4 1 1
 5 18 27 1 2 1
 5 18 27 2 1 1
 5 18 27 3 1 1
 5 18 27 4 1 1
 5 18 28 1 2 1
 5 18 28 2 2 1
 5 18 28 3 1 1
 5 18 28 4 1 1
 5 18 29 1 1 1
 5 18 29 2 1 1
 5 18 29 3 1 1
 5 18 29 4 2 1
 5 18 30 1 1 1
 5 18 30 2 1 1
 5 18 30 3 1 1
 5 18 30 4 1 1
 5 18 31 1 1 1
 5 18 31 2 1 1
 5 18 31 3 1 1
 5 18 31 4 2 1
 5 18 32 1 1 1
 5 18 32 2 1 1
 5 18 32 3 2 1
 5 18 32 4 2 1
 5 19 1 1 2 1
 5 19 1 2 2 1
 5 19 1 3 1 1
 5 19 1 4 1 1
 5 19 2 1 2 1
 5 19 2 2 1 1
 5 19 2 3 1 1
 5 19 2 4 1 1
 5 19 3 1 1 1
 5 19 3 2 1 1
 5 19 3 3 1 1
 5 19 3 4 1 1
 5 19 4 1 1 1
 5 19 4 2 1 1
 5 19 4 3 2 1
 5 19 4 4 1 1
 5 19 5 1 1 1
 5 19 5 2 2 1
 5 19 5 3 1 1
 5 19 5 4 1 1
 5 19 6 1 2 1
 5 19 6 2 1 1
 5 19 6 3 2 1
 5 19 6 4 1 1
 5 19 7 1 2 1
 5 19 7 2 1 1
 5 19 7 3 1 1
 5 19 7 4 1 1
 5 19 8 1 2 1
 5 19 8 2 1 1
 5 19 8 3 2 1
 5 19 8 4 1 1
 5 19 9 1 2 1
 5 19 9 2 2 1
 5 19 9 3 2 1
 5 19 9 4 1 1
 5 19 10 1 1 1
 5 19 10 2 1 1
 5 19 10 3 1 1
 5 19 10 4 2 1
 5 19 11 1 1 1
 5 19 11 2 1 1
 5 19 11 3 1 1
 5 19 11 4 2 1
 5 19 12 1 2 1
 5 19 12 2 1 1
 5 19 12 3 2 1
 5 19 12 4 1 1
 5 19 13 1 1 1
 5 19 13 2 1 1
 5 19 13 3 1 1
 5 19 13 4 1 1
 5 19 14 1 1 1
 5 19 14 2 1 1
 5 19 14 3 2 1
 5 19 14 4 1 1
 5 19 15 1 2 1
 5 19 15 2 1 1
 5 19 15 3 2 1
 5 19 15 4 1 1
 5 19 16 1 1 1
 5 19 16 2 2 1
 5 19 16 3 1 1
 5 19 16 4 2 1
 5 19 17 1 1 1
 5 19 17 2 1 1
 5 19 17 3 2 1
 5 19 17 4 2 1
 5 19 18 1 1 1
 5 19 18 2 2 1
 5 19 18 3 2 1
 5 19 18 4 2 1
 5 19 19 1 1 1
 5 19 19 2 2 1
 5 19 19 3 1 1
 5 19 19 4 1 1
 5 19 20 1 1 1
 5 19 20 2 2 1
 5 19 20 3 2 1
 5 19 20 4 1 1
 5 19 21 1 1 1
 5 19 21 2 1 1
 5 19 21 3 1 1
 5 19 21 4 1 1
 5 19 22 1 1 1
 5 19 22 2 2 1
 5 19 22 3 1 1
 5 19 22 4 1 1
 5 19 23 1 2 1
 5 19 23 2 2 1
 5 19 23 3 1 1
 5 19 23 4 2 1
 5 19 24 1 1 1
 5 19 24 2 1 1
 5 19 24 3 1 1
 5 19 24 4 1 1
 5 19 25 1 1 1
 5 19 25 2 1 1
 5 19 25 3 1 1
 5 19 25 4 1 1
 5 19 26 1 1 1
 5 19 26 2 1 1
 5 19 26 3 1 1
 5 19 26 4 1 1
 5 19 27 1 2 1
 5 19 27 2 2 1
 5 19 27 3 1 1
 5 19 27 4 2 1
 5 19 28 1 1 1
 5 19 28 2 1 1
 5 19 28 3 1 1
 5 19 28 4 1 1
 5 19 29 1 1 1
 5 19 29 2 1 1
 5 19 29 3 2 1
 5 19 29 4 2 1
 5 19 30 1 1 1
 5 19 30 2 1 1
 5 19 30 3 1 1
 5 19 30 4 2 1
 5 19 31 1 2 1
 5 19 31 2 2 1
 5 19 31 3 2 1
 5 19 31 4 2 1
 5 19 32 1 2 1
 5 19 32 2 1 1
 5 19 32 3 1 1
 5 19 32 4 1 1
 5 20 1 1 1 1
 5 20 1 2 2 1
 5 20 1 3 1 1
 5 20 1 4 1 1
 5 20 2 1 2 1
 5 20 2 2 1 1
 5 20 2 3 1 1
 5 20 2 4 1 1
 5 20 3 1 1 1
 5 20 3 2 1 1
 5 20 3 3 1 1
 5 20 3 4 1 1
 5 20 4 1 1 1
 5 20 4 2 1 1
 5 20 4 3 1 1
 5 20 4 4 1 1
 5 20 5 1 1 1
 5 20 5 2 2 1
 5 20 5 3 1 1
 5 20 5 4 1 1
 5 20 6 1 1 1
 5 20 6 2 1 1
 5 20 6 3 2 1
 5 20 6 4 1 1
 5 20 7 1 1 1
 5 20 7 2 1 1
 5 20 7 3 1 1
 5 20 7 4 1 1
 5 20 8 1 1 1
 5 20 8 2 2 1
 5 20 8 3 1 1
 5 20 8 4 2 1
 5 20 9 1 1 1
 5 20 9 2 1 1
 5 20 9 3 2 1
 5 20 9 4 1 1
 5 20 10 1 1 1
 5 20 10 2 2 1
 5 20 10 3 2 1
 5 20 10 4 1 1
 5 20 11 1 1 1
 5 20 11 2 2 1
 5 20 11 3 1 1
 5 20 11 4 1 1
 5 20 12 1 1 1
 5 20 12 2 1 1
 5 20 12 3 1 1
 5 20 12 4 2 1
 5 20 13 1 1 1
 5 20 13 2 2 1
 5 20 13 3 1 1
 5 20 13 4 1 1
 5 20 14 1 1 1
 5 20 14 2 1 1
 5 20 14 3 2 1
 5 20 14 4 1 1
 5 20 15 1 2 1
 5 20 15 2 1 1
 5 20 15 3 1 1
 5 20 15 4 1 1
 5 20 16 1 1 1
 5 20 16 2 1 1
 5 20 16 3 2 1
 5 20 16 4 1 1
 5 20 17 1 2 1
 5 20 17 2 2 1
 5 20 17 3 2 1
 5 20 17 4 2 1
 5 20 18 1 1 1
 5 20 18 2 2 1
 5 20 18 3 1 1
 5 20 18 4 1 1
 5 20 19 1 1 1
 5 20 19 2 1 1
 5 20 19 3 2 1
 5 20 19 4 1 1
 5 20 20 1 1 1
 5 20 20 2 1 1
 5 20 20 3 1 1
 5 20 20 4 2 1
 5 20 21 1 1 1
 5 20 21 2 1 1
 5 20 21 3 2 1
 5 20 21 4 1 1
 5 20 22 1 2 1
 5 20 22 2 2 1
 5 20 22 3 1 1
 5 20 22 4 1 1
 5 20 23 1 1 1
 5 20 23 2 2 1
 5 20 23 3 1 1
 5 20 23 4 1 1
 5 20 24 1 1 1
 5 20 24 2 1 1
 5 20 24 3 2 1
 5 20 24 4 1 1
 5 20 25 1 2 1
 5 20 25 2 1 1
 5 20 25 3 2 1
 5 20 25 4 2 1
 5 20 26 1 2 1
 5 20 26 2 1 1
 5 20 26 3 2 1
 5 20 26 4 2 1
 5 20 27 1 1 1
 5 20 27 2 1 1
 5 20 27 3 1 1
 5 20 27 4 2 1
 5 20 28 1 1 1
 5 20 28 2 2 1
 5 20 28 3 1 1
 5 20 28 4 2 1
 5 20 29 1 2 1
 5 20 29 2 2 1
 5 20 29 3 1 1
 5 20 29 4 1 1
 5 20 30 1 2 1
 5 20 30 2 1 1
 5 20 30 3 2 1
 5 20 30 4 2 1
 5 20 31 1 1 1
 5 20 31 2 1 1
 5 20 31 3 1 1
 5 20 31 4 2 1
 5 20 32 1 1 1
 5 20 32 2 1 1
 5 20 32 3 1 1
 5 20 32 4 1 1
 5 21 1 1 2 1
 5 21 1 2 1 1
 5 21 1 3 1 1
 5 21 1 4 1 1
 5 21 2 1 2 1
 5 21 2 2 1 1
 5 21 2 3 1 1
 5 21 2 4 2 1
 5 21 3 1 2 1
 5 21 3 2 1 1
 5 21 3 3 2 1
 5 21 3 4 1 1
 5 21 4 1 1 1
 5 21 4 2 2 1
 5 21 4 3 1 1
 5 21 4 4 1 1
 5 21 5 1 2 1
 5 21 5 2 1 1
 5 21 5 3 2 1
 5 21 5 4 1 1
 5 21 6 1 2 1
 5 21 6 2 2 1
 5 21 6 3 1 1
 5 21 6 4 2 1
 5 21 7 1 2 1
 5 21 7 2 2 1
 5 21 7 3 2 1
 5 21 7 4 1 1
 5 21 8 1 1 1
 5 21 8 2 1 1
 5 21 8 3 2 1
 5 21 8 4 1 1
 5 21 9 1 2 1
 5 21 9 2 1 1
 5 21 9 3 1 1
 5 21 9 4 2 1
 5 21 10 1 2 1
 5 21 10 2 1 1
 5 21 10 3 1 1
 5 21 10 4 2 1
 5 21 11 1 1 1
 5 21 11 2 2 1
 5 21 11 3 1 1
 5 21 11 4 1 1
 5 21 12 1 1 1
 5 21 12 2 1 1
 5 21 12 3 2 1
 5 21 12 4 1 1
 5 21 13 1 2 1
 5 21 13 2 2 1
 5 21 13 3 2 1
 5 21 13 4 2 1
 5 21 14 1 1 1
 5 21 14 2 2 1
 5 21 14 3 1 1
 5 21 14 4 1 1
 5 21 15 1 1 1
 5 21 15 2 1 1
 5 21 15 3 1 1
 5 21 15 4 1 1
 5 21 16 1 2 1
 5 21 16 2 1 1
 5 21 16 3 2 1
 5 21 16 4 1 1
 5 21 17 1 1 1
 5 21 17 2 1 1
 5 21 17 3 1 1
 5 21 17 4 1 1
 5 21 18 1 1 1
 5 21 18 2 1 1
 5 21 18 3 1 1
 5 21 18 4 1 1
 5 21 19 1 1 1
 5 21 19 2 2 1
 5 21 19 3 1 1
 5 21 19 4 1 1
 5 21 20 1 2 1
 5 21 20 2 1 1
 5 21 20 3 2 1
 5 21 20 4 1 1
 5 21 21 1 1 1
 5 21 21 2 1 1
 5 21 21 3 2 1
 5 21 21 4 2 1
 5 21 22 1 1 1
 5 21 22 2 1 1
 5 21 22 3 1 1
 5 21 22 4 2 1
 5 21 23 1 1 1
 5 21 23 2 2 1
 5 21 23 3 2 1
 5 21 23 4 1 1
 5 21 24 1 1 1
 5 21 24 2 1 1
 5 21 24 3 1 1
 5 21 24 4 1 1
 5 21 25 1 1 1
 5 21 25 2 1 1
 5 21 25 3 1 1
 5 21 25 4 1 1
 5 21 26 1 2 1
 5 21 26 2 2 1
 5 21 26 3 1 1
 5 21 26 4 1 1
 5 21 27 1 1 1
 5 21 27 2 1 1
 5 21 27 3 2 1
 5 21 27 4 1 1
 5 21 28 1 1 1
 5 21 28 2 2 1
 5 21 28 3 1 1
 5 21 28 4 1 1
 5 21 29 1 2 1
 5 21 29 2 1 1
 5 21 29 3 2 1
 5 21 29 4 2 1
 5 21 30 1 2 1
 5 21 30 2 1 1
 5 21 30 3 1 1
 5 21 30 4 2 1
 5 21 31 1 1 1
 5 21 31 2 1 1
 5 21 31 3 1 1
 5 21 31 4 2 1
 5 21 32 1 1 1
 5 21 32 2 1 1
 5 21 32 3 1 1
 5 21 32 4 2 1
 5 22 1 1 1 1
 5 22 1 2 1 1
 5 22 1 3 1 1
 5 22 1 4 1 1
 5 22 2 1 1 1
 5 22 2 2 1 1
 5 22 2 3 2 1
 5 22 2 4 1 1
 5 22 3 1 1 1
 5 22 3 2 1 1
 5 22 3 3 1 1
 5 22 3 4 2 1
 5 22 4 1 1 1
 5 22 4 2 2 1
 5 22 4 3 2 1
 5 22 4 4 1 1
 5 22 5 1 2 1
 5 22 5 2 1 1
 5 22 5 3 1 1
 5 22 5 4 1 1
 5 22 6 1 2 1
 5 22 6 2 2 1
 5 22 6 3 1 1
 5 22 6 4 1 1
 5 22 7 1 1 1
 5 22 7 2 1 1
 5 22 7 3 1 1
 5 22 7 4 1 1
 5 22 8 1 1 1
 5 22 8 2 2 1
 5 22 8 3 2 1
 5 22 8 4 1 1
 5 22 9 1 2 1
 5 22 9 2 1 1
 5 22 9 3 1 1
 5 22 9 4 1 1
 5 22 10 1 1 1
 5 22 10 2 1 1
 5 22 10 3 1 1
 5 22 10 4 2 1
 5 22 11 1 2 1
 5 22 11 2 1 1
 5 22 11 3 1 1
 5 22 11 4 2 1
 5 22 12 1 2 1
 5 22 12 2 1 1
 5 22 12 3 1 1
 5 22 12 4 1 1
 5 22 13 1 2 1
 5 22 13 2 1 1
 5 22 13 3 2 1
 5 22 13 4 1 1
 5 22 14 1 1 1
 5 22 14 2 1 1
 5 22 14 3 2 1
 5 22 14 4 1 1
 5 22 15 1 2 1
 5 22 15 2 1 1
 5 22 15 3 2 1
 5 22 15 4 2 1
 5 22 16 1 1 1
 5 22 16 2 2 1
 5 22 16 3 2 1
 5 22 16 4 1 1
 5 22 17 1 1 1
 5 22 17 2 1 1
 5 22 17 3 2 1
 5 22 17 4 1 1
 5 22 18 1 1 1
 5 22 18 2 1 1
 5 22 18 3 1 1
 5 22 18 4 1 1
 5 22 19 1 2 1
 5 22 19 2 2 1
 5 22 19 3 1 1
 5 22 19 4 1 1
 5 22 20 1 1 1
 5 22 20 2 2 1
 5 22 20 3 1 1
 5 22 20 4 1 1
 5 22 21 1 1 1
 5 22 21 2 1 1
 5 22 21 3 1 1
 5 22 21 4 2 1
 5 22 22 1 2 1
 5 22 22 2 1 1
 5 22 22 3 2 1
 5 22 22 4 2 1
 5 22 23 1 2 1
 5 22 23 2 2 1
 5 22 23 3 1 1
 5 22 23 4 1 1
 5 22 24 1 1 1
 5 22 24 2 2 1
 5 22 24 3 2 1
 5 22 24 4 1 1
 5 22 25 1 1 1
 5 22 25 2 1 1
 5 22 25 3 1 1
 5 22 25 4 1 1
 5 22 26 1 1 1
 5 22 26 2 2 1
 5 22 26 3 1 1
 5 22 26 4 1 1
 5 22 27 1 1 1
 5 22 27 2 1 1
 5 22 27 3 1 1
 5 22 27 4 1 1
 5 22 28 1 2 1
 5 22 28 2 2 1
 5 22 28 3 1 1
 5 22 28 4 1 1
 5 22 29 1 1 1
 5 22 29 2 1 1
 5 22 29 3 1 1
 5 22 29 4 1 1
 5 22 30 1 1 1
 5 22 30 2 1 1
 5 22 30 3 1 1
 5 22 30 4 2 1
 5 22 31 1 1 1
 5 22 31 2 1 1
 5 22 31 3 1 1
 5 22 31 4 1 1
 5 22 32 1 1 1
 5 22 32 2 1 1
 5 22 32 3 1 1
 5 22 32 4 1 1
 5 23 1 1 1 1
 5 23 1 2 1 1
 5 23 1 3 1 1
 5 23 1 4 2 1
 5 23 2 1 2 1
 5 23 2 2 1 1
 5 23 2 3 1 1
 5 23 2 4 1 1
 5 23 3 1 1 1
 5 23 3 2 2 1
 5 23 3 3 2 1
 5 23 3 4 1 1
 5 23 4 1 1 1
 5 23 4 2 1 1
 5 23 4 3 1 1
 5 23 4 4 1 1
 5 23 5 1 2 1
 5 23 5 2 1 1
 5 23 5 3 1 1
 5 23 5 4 1 1
 5 23 6 1 1 1
 5 23 6 2 2 1
 5 23 6 3 1 1
 5 23 6 4 1 1
 5 23 7 1 1 1
 5 23 7 2 1 1
 5 23 7 3 2 1
 5 23 7 4 1 1
 5 23 8 1 1 1
 5 23 8 2 2 1
 5 23 8 3 1 1
 5 23 8 4 2 1
 5 23 9 1 1 1
 5 23 9 2 1 1
 5 23 9 3 2 1
 5 23 9 4 1 1
 5 23 10 1 1 1
 5 23 10 2 1 1
 5 23 10 3 1 1
 5 23 10 4 2 1
 5 23 11 1 2 1
 5 23 11 2 1 1
 5 23 11 3 1 1
 5 23 11 4 1 1
 5 23 12 1 1 1
 5 23 12 2 2 1
 5 23 12 3 2 1
 5 23 12 4 2 1
 5 23 13 1 1 1
 5 23 13 2 1 1
 5 23 13 3 1 1
 5 23 13 4 1 1
 5 23 14 1 1 1
 5 23 14 2 2 1
 5 23 14 3 1 1
 5 23 14 4 2 1
 5 23 15 1 1 1
 5 23 15 2 2 1
 5 23 15 3 1 1
 5 23 15 4 1 1
 5 23 16 1 2 1
 5 23 16 2 1 1
 5 23 16 3 1 1
 5 23 16 4 1 1
 5 23 17 1 1 1
 5 23 17 2 1 1
 5 23 17 3 1 1
 5 23 17 4 1 1
 5 23 18 1 1 1
 5 23 18 2 1 1
 5 23 18 3 1 1
 5 23 18 4 2 1
 5 23 19 1 1 1
 5 23 19 2 1 1
 5 23 19 3 1 1
 5 23 19 4 1 1
 5 23 20 1 1 1
 5 23 20 2 1 1
 5 23 20 3 2 1
 5 23 20 4 1 1
 5 23 21 1 2 1
 5 23 21 2 1 1
 5 23 21 3 2 1
 5 23 21 4 1 1
 5 23 22 1 2 1
 5 23 22 2 2 1
 5 23 22 3 1 1
 5 23 22 4 1 1
 5 23 23 1 1 1
 5 23 23 2 1 1
 5 23 23 3 2 1
 5 23 23 4 1 1
 5 23 24 1 1 1
 5 23 24 2 2 1
 5 23 24 3 1 1
 5 23 24 4 1 1
 5 23 25 1 1 1
 5 23 25 2 1 1
 5 23 25 3 1 1
 5 23 25 4 1 1
 5 23 26 1 1 1
 5 23 26 2 1 1
 5 23 26 3 2 1
 5 23 26 4 1 1
 5 23 27 1 2 1
 5 23 27 2 1 1
 5 23 27 3 1 1
 5 23 27 4 2 1
 5 23 28 1 2 1
 5 23 28 2 1 1
 5 23 28 3 2 1
 5 23 28 4 1 1
 5 23 29 1 1 1
 5 23 29 2 2 1
 5 23 29 3 1 1
 5 23 29 4 1 1
 5 23 30 1 1 1
 5 23 30 2 1 1
 5 23 30 3 1 1
 5 23 30 4 2 1
 5 23 31 1 1 1
 5 23 31 2 1 1
 5 23 31 3 2 1
 5 23 31 4 1 1
 5 23 32 1 2 1
 5 23 32 2 2 1
 5 23 32 3 2 1
 5 23 32 4 1 1
 5 24 1 1 1 1
 5 24 1 2 1 1
 5 24 1 3 2 1
 5 24 1 4 1 1
 5 24 2 1 1 1
 5 24 2 2 1 1
 5 24 2 3 2 1
 5 24 2 4 1 1
 5 24 3 1 2 1
 5 24 3 2 2 1
 5 24 3 3 1 1
 5 24 3 4 1 1
 5 24 4 1 2 1
 5 24 4 2 1 1
 5 24 4 3 2 1
 5 24 4 4 2 1
 5 24 5 1 2 1
 5 24 5 2 1 1
 5 24 5 3 2 1
 5 24 5 4 1 1
 5 24 6 1 1 1
 5 24 6 2 1 1
 5 24 6 3 1 1
 5 24 6 4 1 1
 5 24 7 1 1 1
 5 24 7 2 1 1
 5 24 7 3 2 1
 5 24 7 4 1 1
 5 24 8 1 2 1
 5 24 8 2 1 1
 5 24 8 3 2 1
 5 24 8 4 1 1
 5 24 9 1 2 1
 5 24 9 2 1 1
 5 24 9 3 2 1
 5 24 9 4 1 1
 5 24 10 1 2 1
 5 24 10 2 1 1
 5 24 10 3 1 1
 5 24 10 4 1 1
 5 24 11 1 1 1
 5 24 11 2 1 1
 5 24 11 3 1 1
 5 24 11 4 2 1
 5 24 12 1 1 1
 5 24 12 2 1 1
 5 24 12 3 1 1
 5 24 12 4 1 1
 5 24 13 1 1 1
 5 24 13 2 1 1
 5 24 13 3 1 1
 5 24 13 4 2 1
 5 24 14 1 1 1
 5 24 14 2 2 1
 5 24 14 3 2 1
 5 24 14 4 2 1
 5 24 15 1 1 1
 5 24 15 2 2 1
 5 24 15 3 1 1
 5 24 15 4 1 1
 5 24 16 1 1 1
 5 24 16 2 1 1
 5 24 16 3 1 1
 5 24 16 4 1 1
 5 24 17 1 2 1
 5 24 17 2 2 1
 5 24 17 3 2 1
 5 24 17 4 2 1
 5 24 18 1 1 1
 5 24 18 2 2 1
 5 24 18 3 2 1
 5 24 18 4 1 1
 5 24 19 1 2 1
 5 24 19 2 2 1
 5 24 19 3 1 1
 5 24 19 4 1 1
 5 24 20 1 1 1
 5 24 20 2 1 1
 5 24 20 3 2 1
 5 24 20 4 2 1
 5 24 21 1 1 1
 5 24 21 2 1 1
 5 24 21 3 1 1
 5 24 21 4 1 1
 5 24 22 1 1 1
 5 24 22 2 2 1
 5 24 22 3 1 1
 5 24 22 4 2 1
 5 24 23 1 2 1
 5 24 23 2 1 1
 5 24 23 3 1 1
 5 24 23 4 2 1
 5 24 24 1 1 1
 5 24 24 2 1 1
 5 24 24 3 1 1
 5 24 24 4 1 1
 5 24 25 1 1 1
 5 24 25 2 1 1
 5 24 25 3 1 1
 5 24 25 4 2 1
 5 24 26 1 1 1
 5 24 26 2 1 1
 5 24 26 3 2 1
 5 24 26 4 1 1
 5 24 27 1 1 1
 5 24 27 2 1 1
 5 24 27 3 1 1
 5 24 27 4 2 1
 5 24 28 1 2 1
 5 24 28 2 1 1
 5 24 28 3 1 1
 5 24 28 4 1 1
 5 24 29 1 1 1
 5 24 29 2 2 1
 5 24 29 3 2 1
 5 24 29 4 1 1
 5 24 30 1 1 1
 5 24 30 2 1 1
 5 24 30 3 2 1
 5 24 30 4 2 1
 5 24 31 1 1 1
 5 24 31 2 1 1
 5 24 31 3 1 1
 5 24 31 4 1 1
 5 24 32 1 2 1
 5 24 32 2 1 1
 5 24 32 3 2 1
 5 24 32 4 1 1
 5 25 1 1 1 1
 5 25 1 2 2 1
 5 25 1 3 1 1
 5 25 1 4 1 1
 5 25 2 1 1 1
 5 25 2 2 1 1
 5 25 2 3 2 1
 5 25 2 4 2 1
 5 25 3 1 1 1
 5 25 3 2 1 1
 5 25 3 3 1 1
 5 25 3 4 1 1
 5 25 4 1 2 1
 5 25 4 2 1 1
 5 25 4 3 1 1
 5 25 4 4 1 1
 5 25 5 1 1 1
 5 25 5 2 2 1
 5 25 5 3 2 1
 5 25 5 4 1 1
 5 25 6 1 2 1
 5 25 6 2 1 1
 5 25 6 3 2 1
 5 25 6 4 1 1
 5 25 7 1 2 1
 5 25 7 2 1 1
 5 25 7 3 1 1
 5 25 7 4 1 1
 5 25 8 1 1 1
 5 25 8 2 2 1
 5 25 8 3 2 1
 5 25 8 4 1 1
 5 25 9 1 2 1
 5 25 9 2 2 1
 5 25 9 3 1 1
 5 25 9 4 2 1
 5 25 10 1 1 1
 5 25 10 2 2 1
 5 25 10 3 1 1
 5 25 10 4 1 1
 5 25 11 1 2 1
 5 25 11 2 1 1
 5 25 11 3 1 1
 5 25 11 4 1 1
 5 25 12 1 1 1
 5 25 12 2 1 1
 5 25 12 3 1 1
 5 25 12 4 2 1
 5 25 13 1 2 1
 5 25 13 2 1 1
 5 25 13 3 1 1
 5 25 13 4 1 1
 5 25 14 1 1 1
 5 25 14 2 1 1
 5 25 14 3 1 1
 5 25 14 4 2 1
 5 25 15 1 2 1
 5 25 15 2 1 1
 5 25 15 3 2 1
 5 25 15 4 1 1
 5 25 16 1 2 1
 5 25 16 2 1 1
 5 25 16 3 1 1
 5 25 16 4 1 1
 5 25 17 1 1 1
 5 25 17 2 1 1
 5 25 17 3 1 1
 5 25 17 4 1 1
 5 25 18 1 2 1
 5 25 18 2 1 1
 5 25 18 3 1 1
 5 25 18 4 1 1
 5 25 19 1 1 1
 5 25 19 2 2 1
 5 25 19 3 2 1
 5 25 19 4 1 1
 5 25 20 1 2 1
 5 25 20 2 1 1
 5 25 20 3 2 1
 5 25 20 4 1 1
 5 25 21 1 2 1
 5 25 21 2 2 1
 5 25 21 3 2 1
 5 25 21 4 1 1
 5 25 22 1 2 1
 5 25 22 2 1 1
 5 25 22 3 2 1
 5 25 22 4 1 1
 5 25 23 1 1 1
 5 25 23 2 2 1
 5 25 23 3 2 1
 5 25 23 4 1 1
 5 25 24 1 1 1
 5 25 24 2 1 1
 5 25 24 3 2 1
 5 25 24 4 2 1
 5 25 25 1 1 1
 5 25 25 2 2 1
 5 25 25 3 2 1
 5 25 25 4 2 1
 5 25 26 1 2 1
 5 25 26 2 1 1
 5 25 26 3 1 1
 5 25 26 4 1 1
 5 25 27 1 1 1
 5 25 27 2 1 1
 5 25 27 3 1 1
 5 25 27 4 1 1
 5 25 28 1 1 1
 5 25 28 2 2 1
 5 25 28 3 1 1
 5 25 28 4 1 1
 5 25 29 1 1 1
 5 25 29 2 1 1
 5 25 29 3 2 1
 5 25 29 4 1 1
 5 25 30 1 2 1
 5 25 30 2 1 1
 5 25 30 3 1 1
 5 25 30 4 1 1
 5 25 31 1 2 1
 5 25 31 2 2 1
 5 25 31 3 1 1
 5 25 31 4 1 1
 5 25 32 1 2 1
 5 25 32 2 1 1
 5 25 32 3 1 1
 5 25 32 4 2 1
 5 26 1 1 2 1
 5 26 1 2 1 1
 5 26 1 3 1 1
 5 26 1 4 1 1
 5 26 2 1 1 1
 5 26 2 2 1 1
 5 26 2 3 1 1
 5 26 2 4 1 1
 5 26 3 1 2 1
 5 26 3 2 1 1
 5 26 3 3 2 1
 5 26 3 4 2 1
 5 26 4 1 2 1
 5 26 4 2 1 1
 5 26 4 3 1 1
 5 26 4 4 2 1
 5 26 5 1 1 1
 5 26 5 2 1 1
 5 26 5 3 2 1
 5 26 5 4 1 1
 5 26 6 1 1 1
 5 26 6 2 1 1
 5 26 6 3 1 1
 5 26 6 4 1 1
 5 26 7 1 2 1
 5 26 7 2 1 1
 5 26 7 3 1 1
 5 26 7 4 1 1
 5 26 8 1 1 1
 5 26 8 2 2 1
 5 26 8 3 1 1
 5 26 8 4 2 1
 5 26 9 1 1 1
 5 26 9 2 1 1
 5 26 9 3 1 1
 5 26 9 4 1 1
 5 26 10 1 1 1
 5 26 10 2 2 1
 5 26 10 3 1 1
 5 26 10 4 1 1
 5 26 11 1 1 1
 5 26 11 2 2 1
 5 26 11 3 1 1
 5 26 11 4 2 1
 5 26 12 1 2 1
 5 26 12 2 2 1
 5 26 12 3 1 1
 5 26 12 4 1 1
 5 26 13 1 2 1
 5 26 13 2 1 1
 5 26 13 3 2 1
 5 26 13 4 2 1
 5 26 14 1 1 1
 5 26 14 2 1 1
 5 26 14 3 2 1
 5 26 14 4 2 1
 5 26 15 1 1 1
 5 26 15 2 1 1
 5 26 15 3 2 1
 5 26 15 4 1 1
 5 26 16 1 1 1
 5 26 16 2 1 1
 5 26 16 3 1 1
 5 26 16 4 2 1
 5 26 17 1 2 1
 5 26 17 2 1 1
 5 26 17 3 1 1
 5 26 17 4 1 1
 5 26 18 1 1 1
 5 26 18 2 1 1
 5 26 18 3 1 1
 5 26 18 4 2 1
 5 26 19 1 1 1
 5 26 19 2 1 1
 5 26 19 3 2 1
 5 26 19 4 1 1
 5 26 20 1 2 1
 5 26 20 2 1 1
 5 26 20 3 2 1
 5 26 20 4 1 1
 5 26 21 1 2 1
 5 26 21 2 1 1
 5 26 21 3 1 1
 5 26 21 4 1 1
 5 26 22 1 1 1
 5 26 22 2 1 1
 5 26 22 3 1 1
 5 26 22 4 2 1
 5 26 23 1 1 1
 5 26 23 2 2 1
 5 26 23 3 1 1
 5 26 23 4 1 1
 5 26 24 1 1 1
 5 26 24 2 1 1
 5 26 24 3 1 1
 5 26 24 4 1 1
 5 26 25 1 1 1
 5 26 25 2 2 1
 5 26 25 3 2 1
 5 26 25 4 2 1
 5 26 26 1 1 1
 5 26 26 2 1 1
 5 26 26 3 2 1
 5 26 26 4 1 1
 5 26 27 1 2 1
 5 26 27 2 1 1
 5 26 27 3 1 1
 5 26 27 4 1 1
 5 26 28 1 1 1
 5 26 28 2 1 1
 5 26 28 3 1 1
 5 26 28 4 1 1
 5 26 29 1 1 1
 5 26 29 2 1 1
 5 26 29 3 2 1
 5 26 29 4 1 1
 5 26 30 1 1 1
 5 26 30 2 2 1
 5 26 30 3 1 1
 5 26 30 4 1 1
 5 26 31 1 2 1
 5 26 31 2 1 1
 5 26 31 3 1 1
 5 26 31 4 2 1
 5 26 32 1 2 1
 5 26 32 2 1 1
 5 26 32 3 1 1
 5 26 32 4 1 1
 5 27 1 1 1 1
 5 27 1 2 1 1
 5 27 1 3 1 1
 5 27 1 4 2 1
 5 27 2 1 2 1
 5 27 2 2 1 1
 5 27 2 3 1 1
 5 27 2 4 1 1
 5 27 3 1 1 1
 5 27 3 2 2 1
 5 27 3 3 1 1
 5 27 3 4 2 1
 5 27 4 1 1 1
 5 27 4 2 1 1
 5 27 4 3 2 1
 5 27 4 4 1 1
 5 27 5 1 1 1
 5 27 5 2 1 1
 5 27 5 3 1 1
 5 27 5 4 1 1
 5 27 6 1 1 1
 5 27 6 2 2 1
 5 27 6 3 1 1
 5 27 6 4 2 1
 5 27 7 1 1 1
 5 27 7 2 1 1
 5 27 7 3 2 1
 5 27 7 4 1 1
 5 27 8 1 1 1
 5 27 8 2 2 1
 5 27 8 3 2 1
 5 27 8 4 1 1
 5 27 9 1 2 1
 5 27 9 2 1 1
 5 27 9 3 1 1
 5 27 9 4 2 1
 5 27 10 1 2 1
 5 27 10 2 2 1
 5 27 10 3 2 1
 5 27 10 4 2 1
 5 27 11 1 1 1
 5 27 11 2 1 1
 5 27 11 3 1 1
 5 27 11 4 1 1
 5 27 12 1 1 1
 5 27 12 2 1 1
 5 27 12 3 2 1
 5 27 12 4 1 1
 5 27 13 1 2 1
 5 27 13 2 2 1
 5 27 13 3 1 1
 5 27 13 4 1 1
 5 27 14 1 1 1
 5 27 14 2 2 1
 5 27 14 3 2 1
 5 27 14 4 1 1
 5 27 15 1 1 1
 5 27 15 2 1 1
 5 27 15 3 1 1
 5 27 15 4 1 1
 5 27 16 1 1 1
 5 27 16 2 2 1
 5 27 16 3 2 1
 5 27 16 4 2 1
 5 27 17 1 1 1
 5 27 17 2 1 1
 5 27 17 3 1 1
 5 27 17 4 1 1
 5 27 18 1 2 1
 5 27 18 2 1 1
 5 27 18 3 1 1
 5 27 18 4 1 1
 5 27 19 1 1 1
 5 27 19 2 1 1
 5 27 19 3 1 1
 5 27 19 4 1 1
 5 27 20 1 2 1
 5 27 20 2 1 1
 5 27 20 3 1 1
 5 27 20 4 2 1
 5 27 21 1 1 1
 5 27 21 2 1 1
 5 27 21 3 2 1
 5 27 21 4 1 1
 5 27 22 1 1 1
 5 27 22 2 2 1
 5 27 22 3 1 1
 5 27 22 4 1 1
 5 27 23 1 2 1
 5 27 23 2 1 1
 5 27 23 3 1 1
 5 27 23 4 1 1
 5 27 24 1 1 1
 5 27 24 2 1 1
 5 27 24 3 1 1
 5 27 24 4 2 1
 5 27 25 1 1 1
 5 27 25 2 2 1
 5 27 25 3 2 1
 5 27 25 4 2 1
 5 27 26 1 1 1
 5 27 26 2 2 1
 5 27 26 3 2 1
 5 27 26 4 1 1
 5 27 27 1 1 1
 5 27 27 2 1 1
 5 27 27 3 1 1
 5 27 27 4 2 1
 5 27 28 1 1 1
 5 27 28 2 2 1
 5 27 28 3 2 1
 5 27 28 4 2 1
 5 27 29 1 2 1
 5 27 29 2 1 1
 5 27 29 3 1 1
 5 27 29 4 2 1
 5 27 30 1 1 1
 5 27 30 2 1 1
 5 27 30 3 2 1
 5 27 30 4 1 1
 5 27 31 1 1 1
 5 27 31 2 2 1
 5 27 31 3 2 1
 5 27 31 4 1 1
 5 27 32 1 2 1
 5 27 32 2 1 1
 5 27 32 3 1 1
 5 27 32 4 1 1
 5 28 1 1 1 1
 5 28 1 2 1 1
 5 28 1 3 1 1
 5 28 1 4 2 1
 5 28 2 1 1 1
 5 28 2 2 2 1
 5 28 2 3 2 1
 5 28 2 4 1 1
 5 28 3 1 1 1
 5 28 3 2 1 1
 5 28 3 3 2 1
 5 28 3 4 2 1
 5 28 4 1 1 1
 5 28 4 2 2 1
 5 28 4 3 1 1
 5 28 4 4 1 1
 5 28 5 1 1 1
 5 28 5 2 1 1
 5 28 5 3 2 1
 5 28 5 4 1 1
 5 28 6 1 2 1
 5 28 6 2 1 1
 5 28 6 3 2 1
 5 28 6 4 2 1
 5 28 7 1 1 1
 5 28 7 2 2 1
 5 28 7 3 1 1
 5 28 7 4 1 1
 5 28 8 1 1 1
 5 28 8 2 2 1
 5 28 8 3 1 1
 5 28 8 4 2 1
 5 28 9 1 1 1
 5 28 9 2 1 1
 5 28 9 3 2 1
 5 28 9 4 1 1
 5 28 10 1 2 1
 5 28 10 2 2 1
 5 28 10 3 1 1
 5 28 10 4 2 1
 5 28 11 1 1 1
 5 28 11 2 1 1
 5 28 11 3 1 1
 5 28 11 4 1 1
 5 28 12 1 2 1
 5 28 12 2 1 1
 5 28 12 3 2 1
 5 28 12 4 1 1
 5 28 13 1 1 1
 5 28 13 2 1 1
 5 28 13 3 1 1
 5 28 13 4 1 1
 5 28 14 1 1 1
 5 28 14 2 2 1
 5 28 14 3 1 1
 5 28 14 4 2 1
 5 28 15 1 1 1
 5 28 15 2 2 1
 5 28 15 3 2 1
 5 28 15 4 1 1
 5 28 16 1 1 1
 5 28 16 2 1 1
 5 28 16 3 2 1
 5 28 16 4 2 1
 5 28 17 1 1 1
 5 28 17 2 1 1
 5 28 17 3 2 1
 5 28 17 4 1 1
 5 28 18 1 1 1
 5 28 18 2 1 1
 5 28 18 3 1 1
 5 28 18 4 2 1
 5 28 19 1 2 1
 5 28 19 2 2 1
 5 28 19 3 1 1
 5 28 19 4 1 1
 5 28 20 1 1 1
 5 28 20 2 2 1
 5 28 20 3 1 1
 5 28 20 4 1 1
 5 28 21 1 1 1
 5 28 21 2 1 1
 5 28 21 3 2 1
 5 28 21 4 1 1
 5 28 22 1 2 1
 5 28 22 2 1 1
 5 28 22 3 1 1
 5 28 22 4 1 1
 5 28 23 1 1 1
 5 28 23 2 2 1
 5 28 23 3 1 1
 5 28 23 4 2 1
 5 28 24 1 2 1
 5 28 24 2 2 1
 5 28 24 3 1 1
 5 28 24 4 1 1
 5 28 25 1 2 1
 5 28 25 2 1 1
 5 28 25 3 1 1
 5 28 25 4 1 1
 5 28 26 1 2 1
 5 28 26 2 1 1
 5 28 26 3 2 1
 5 28 26 4 2 1
 5 28 27 1 1 1
 5 28 27 2 1 1
 5 28 27 3 1 1
 5 28 27 4 1 1
 5 28 28 1 1 1
 5 28 28 2 2 1
 5 28 28 3 1 1
 5 28 28 4 2 1
 5 28 29 1 1 1
 5 28 29 2 2 1
 5 28 29 3 1 1
 5 28 29 4 2 1
 5 28 30 1 1 1
 5 28 30 2 2 1
 5 28 30 3 2 1
 5 28 30 4 1 1
 5 28 31 1 2 1
 5 28 31 2 1 1
 5 28 31 3 2 1
 5 28 31 4 1 1
 5 28 32 1 1 1
 5 28 32 2 2 1
 5 28 32 3 1 1
 5 28 32 4 1 1
 5 29 1 1 1 1
 5 29 1 2 1 1
 5 29 1 3 1 1
 5 29 1 4 1 1
 5 29 2 1 1 1
 5 29 2 2 1 1
 5 29 2 3 2 1
 5 29 2 4 2 1
 5 29 3 1 1 1
 5 29 3 2 1 1
 5 29 3 3 1 1
 5 29 3 4 1 1
 5 29 4 1 1 1
 5 29 4 2 1 1
 5 29 4 3 2 1
 5 29 4 4 2 1
 5 29 5 1 1 1
 5 29 5 2 2 1
 5 29 5 3 1 1
 5 29 5 4 1 1
 5 29 6 1 2 1
 5 29 6 2 1 1
 5 29 6 3 1 1
 5 29 6 4 1 1
 5 29 7 1 1 1
 5 29 7 2 1 1
 5 29 7 3 1 1
 5 29 7 4 1 1
 5 29 8 1 2 1
 5 29 8 2 1 1
 5 29 8 3 2 1
 5 29 8 4 2 1
 5 29 9 1 1 1
 5 29 9 2 2 1
 5 29 9 3 2 1
 5 29 9 4 2 1
 5 29 10 1 1 1
 5 29 10 2 1 1
 5 29 10 3 2 1
 5 29 10 4 1 1
 5 29 11 1 1 1
 5 29 11 2 2 1
 5 29 11 3 1 1
 5 29 11 4 1 1
 5 29 12 1 2 1
 5 29 12 2 1 1
 5 29 12 3 1 1
 5 29 12 4 1 1
 5 29 13 1 1 1
 5 29 13 2 1 1
 5 29 13 3 1 1
 5 29 13 4 1 1
 5 29 14 1 1 1
 5 29 14 2 2 1
 5 29 14 3 1 1
 5 29 14 4 1 1
 5 29 15 1 1 1
 5 29 15 2 2 1
 5 29 15 3 1 1
 5 29 15 4 2 1
 5 29 16 1 2 1
 5 29 16 2 1 1
 5 29 16 3 2 1
 5 29 16 4 2 1
 5 29 17 1 1 1
 5 29 17 2 1 1
 5 29 17 3 1 1
 5 29 17 4 1 1
 5 29 18 1 1 1
 5 29 18 2 1 1
 5 29 18 3 2 1
 5 29 18 4 2 1
 5 29 19 1 1 1
 5 29 19 2 1 1
 5 29 19 3 1 1
 5 29 19 4 2 1
 5 29 20 1 1 1
 5 29 20 2 1 1
 5 29 20 3 1 1
 5 29 20 4 1 1
 5 29 21 1 1 1
 5 29 21 2 2 1
 5 29 21 3 1 1
 5 29 21 4 1 1
 5 29 22 1 1 1
 5 29 22 2 1 1
 5 29 22 3 2 1
 5 29 22 4 2 1
 5 29 23 1 1 1
 5 29 23 2 2 1
 5 29 23 3 1 1
 5 29 23 4 1 1
 5 29 24 1 1 1
 5 29 24 2 2 1
 5 29 24 3 2 1
 5 29 24 4 2 1
 5 29 25 1 2 1
 5 29 25 2 1 1
 5 29 25 3 1 1
 5 29 25 4 2 1
 5 29 26 1 1 1
 5 29 26 2 1 1
 5 29 26 3 1 1
 5 29 26 4 1 1
 5 29 27 1 1 1
 5 29 27 2 2 1
 5 29 27 3 1 1
 5 29 27 4 1 1
 5 29 28 1 1 1
 5 29 28 2 2 1
 5 29 28 3 1 1
 5 29 28 4 2 1
 5 29 29 1 1 1
 5 29 29 2 1 1
 5 29 29 3 1 1
 5 29 29 4 1 1
 5 29 30 1 1 1
 5 29 30 2 2 1
 5 29 30 3 1 1
 5 29 30 4 2 1
 5 29 31 1 2 1
 5 29 31 2 1 1
 5 29 31 3 1 1
 5 29 31 4 2 1
 5 29 32 1 2 1
 5 29 32 2 1 1
 5 29 32 3 1 1
 5 29 32 4 1 1
 5 30 1 1 1 1
 5 30 1 2 1 1
 5 30 1 3 1 1
 5 30 1 4 1 1
 5 30 2 1 2 1
 5 30 2 2 1 1
 5 30 2 3 2 1
 5 30 2 4 1 1
 5 30 3 1 1 1
 5 30 3 2 1 1
 5 30 3 3 1 1
 5 30 3 4 1 1
 5 30 4 1 1 1
 5 30 4 2 1 1
 5 30 4 3 1 1
 5 30 4 4 2 1
 5 30 5 1 1 1
 5 30 5 2 1 1
 5 30 5 3 1 1
 5 30 5 4 1 1
 5 30 6 1 1 1
 5 30 6 2 2 1
 5 30 6 3 1 1
 5 30 6 4 2 1
 5 30 7 1 1 1
 5 30 7 2 1 1
 5 30 7 3 1 1
 5 30 7 4 2 1
 5 30 8 1 2 1
 5 30 8 2 1 1
 5 30 8 3 1 1
 5 30 8 4 1 1
 5 30 9 1 1 1
 5 30 9 2 1 1
 5 30 9 3 1 1
 5 30 9 4 1 1
 5 30 10 1 1 1
 5 30 10 2 1 1
 5 30 10 3 1 1
 5 30 10 4 2 1
 5 30 11 1 1 1
 5 30 11 2 1 1
 5 30 11 3 1 1
 5 30 11 4 1 1
 5 30 12 1 1 1
 5 30 12 2 2 1
 5 30 12 3 2 1
 5 30 12 4 2 1
 5 30 13 1 1 1
 5 30 13 2 2 1
 5 30 13 3 1 1
 5 30 13 4 2 1
 5 30 14 1 2 1
 5 30 14 2 2 1
 5 30 14 3 1 1
 5 30 14 4 2 1
 5 30 15 1 1 1
 5 30 15 2 1 1
 5 30 15 3 1 1
 5 30 15 4 1 1
 5 30 16 1 1 1
 5 30 16 2 1 1
 5 30 16 3 2 1
 5 30 16 4 1 1
 5 30 17 1 1 1
 5 30 17 2 1 1
 5 30 17 3 1 1
 5 30 17 4 2 1
 5 30 18 1 2 1
 5 30 18 2 2 1
 5 30 18 3 1 1
 5 30 18 4 1 1
 5 30 19 1 2 1
 5 30 19 2 1 1
 5 30 19 3 1 1
 5 30 19 4 2 1
 5 30 20 1 1 1
 5 30 20 2 1 1
 5 30 20 3 2 1
 5 30 20 4 1 1
 5 30 21 1 1 1
 5 30 21 2 1 1
 5 30 21 3 2 1
 5 30 21 4 1 1
 5 30 22 1 2 1
 5 30 22 2 1 1
 5 30 22 3 1 1
 5 30 22 4 2 1
 5 30 23 1 1 1
 5 30 23 2 2 1
 5 30 23 3 2 1
 5 30 23 4 1 1
 5 30 24 1 2 1
 5 30 24 2 1 1
 5 30 24 3 1 1
 5 30 24 4 1 1
 5 30 25 1 1 1
 5 30 25 2 2 1
 5 30 25 3 1 1
 5 30 25 4 1 1
 5 30 26 1 2 1
 5 30 26 2 1 1
 5 30 26 3 1 1
 5 30 26 4 2 1
 5 30 27 1 1 1
 5 30 27 2 1 1
 5 30 27 3 1 1
 5 30 27 4 1 1
 5 30 28 1 1 1
 5 30 28 2 1 1
 5 30 28 3 1 1
 5 30 28 4 1 1
 5 30 29 1 1 1
 5 30 29 2 1 1
 5 30 29 3 1 1
 5 30 29 4 1 1
 5 30 30 1 1 1
 5 30 30 2 1 1
 5 30 30 3 1 1
 5 30 30 4 1 1
 5 30 31 1 2 1
 5 30 31 2 2 1
 5 30 31 3 2 1
 5 30 31 4 1 1
 5 30 32 1 2 1
 5 30 32 2 1 1
 5 30 32 3 2 1
 5 30 32 4 1 1
 5 31 1 1 2 1
 5 31 1 2 1 1
 5 31 1 3 1 1
 5 31 1 4 1 1
 5 31 2 1 2 1
 5 31 2 2 2 1
 5 31 2 3 2 1
 5 31 2 4 1 1
 5 31 3 1 1 1
 5 31 3 2 1 1
 5 31 3 3 1 1
 5 31 3 4 1 1
 5 31 4 1 2 1
 5 31 4 2 1 1
 5 31 4 3 1 1
 5 31 4 4 1 1
 5 31 5 1 1 1
 5 31 5 2 1 1
 5 31 5 3 1 1
 5 31 5 4 1 1
 5 31 6 1 1 1
 5 31 6 2 1 1
 5 31 6 3 1 1
 5 31 6 4 2 1
 5 31 7 1 2 1
 5 31 7 2 1 1
 5 31 7 3 1 1
 5 31 7 4 1 1
 5 31 8 1 1 1
 5 31 8 2 1 1
 5 31 8 3 1 1
 5 31 8 4 1 1
 5 31 9 1 2 1
 5 31 9 2 1 1
 5 31 9 3 2 1
 5 31 9 4 1 1
 5 31 10 1 1 1
 5 31 10 2 1 1
 5 31 10 3 2 1
 5 31 10 4 1 1
 5 31 11 1 1 1
 5 31 11 2 2 1
 5 31 11 3 2 1
 5 31 11 4 2 1
 5 31 12 1 1 1
 5 31 12 2 1 1
 5 31 12 3 1 1
 5 31 12 4 1 1
 5 31 13 1 1 1
 5 31 13 2 2 1
 5 31 13 3 1 1
 5 31 13 4 1 1
 5 31 14 1 1 1
 5 31 14 2 1 1
 5 31 14 3 1 1
 5 31 14 4 1 1
 5 31 15 1 2 1
 5 31 15 2 2 1
 5 31 15 3 1 1
 5 31 15 4 1 1
 5 31 16 1 1 1
 5 31 16 2 1 1
 5 31 16 3 1 1
 5 31 16 4 1 1
 5 31 17 1 1 1
 5 31 17 2 2 1
 5 31 17 3 1 1
 5 31 17 4 1 1
 5 31 18 1 2 1
 5 31 18 2 1 1
 5 31 18 3 1 1
 5 31 18 4 1 1
 5 31 19 1 1 1
 5 31 19 2 1 1
 5 31 19 3 2 1
 5 31 19 4 1 1
 5 31 20 1 1 1
 5 31 20 2 1 1
 5 31 20 3 2 1
 5 31 20 4 1 1
 5 31 21 1 1 1
 5 31 21 2 1 1
 5 31 21 3 1 1
 5 31 21 4 1 1
 5 31 22 1 2 1
 5 31 22 2 2 1
 5 31 22 3 1 1
 5 31 22 4 2 1
 5 31 23 1 1 1
 5 31 23 2 1 1
 5 31 23 3 1 1
 5 31 23 4 2 1
 5 31 24 1 1 1
 5 31 24 2 1 1
 5 31 24 3 1 1
 5 31 24 4 1 1
 5 31 25 1 1 1
 5 31 25 2 1 1
 5 31 25 3 2 1
 5 31 25 4 2 1
 5 31 26 1 1 1
 5 31 26 2 1 1
 5 31 26 3 1 1
 5 31 26 4 1 1
 5 31 27 1 2 1
 5 31 27 2 2 1
 5 31 27 3 1 1
 5 31 27 4 1 1
 5 31 28 1 2 1
 5 31 28 2 1 1
 5 31 28 3 1 1
 5 31 28 4 1 1
 5 31 29 1 1 1
 5 31 29 2 1 1
 5 31 29 3 1 1
 5 31 29 4 1 1
 5 31 30 1 1 1
 5 31 30 2 1 1
 5 31 30 3 1 1
 5 31 30 4 1 1
 5 31 31 1 1 1
 5 31 31 2 2 1
 5 31 31 3 1 1
 5 31 31 4 2 1
 5 31 32 1 1 1
 5 31 32 2 1 1
 5 31 32 3 1 1
 5 31 32 4 1 1
 5 32 1 1 1 1
 5 32 1 2 2 1
 5 32 1 3 2 1
 5 32 1 4 1 1
 5 32 2 1 2 1
 5 32 2 2 1 1
 5 32 2 3 1 1
 5 32 2 4 1 1
 5 32 3 1 2 1
 5 32 3 2 2 1
 5 32 3 3 1 1
 5 32 3 4 1 1
 5 32 4 1 2 1
 5 32 4 2 1 1
 5 32 4 3 1 1
 5 32 4 4 1 1
 5 32 5 1 1 1
 5 32 5 2 2 1
 5 32 5 3 1 1
 5 32 5 4 1 1
 5 32 6 1 1 1
 5 32 6 2 2 1
 5 32 6 3 1 1
 5 32 6 4 1 1
 5 32 7 1 1 1
 5 32 7 2 2 1
 5 32 7 3 2 1
 5 32 7 4 2 1
 5 32 8 1 1 1
 5 32 8 2 2 1
 5 32 8 3 1 1
 5 32 8 4 1 1
 5 32 9 1 1 1
 5 32 9 2 1 1
 5 32 9 3 1 1
 5 32 9 4 1 1
 5 32 10 1 1 1
 5 32 10 2 2 1
 5 32 10 3 1 1
 5 32 10 4 1 1
 5 32 11 1 1 1
 5 32 11 2 1 1
 5 32 11 3 2 1
 5 32 11 4 1 1
 5 32 12 1 2 1
 5 32 12 2 1 1
 5 32 12 3 1 1
 5 32 12 4 2 1
 5 32 13 1 1 1
 5 32 13 2 1 1
 5 32 13 3 2 1
 5 32 13 4 1 1
 5 32 14 1 1 1
 5 32 14 2 2 1
 5 32 14 3 2 1
 5 32 14 4 1 1
 5 32 15 1 2 1
 5 32 15 2 1 1
 5 32 15 3 1 1
 5 32 15 4 1 1
 5 32 16 1 1 1
 5 32 16 2 2 1
 5 32 16 3 2 1
 5 32 16 4 1 1
 5 32 17 1 1 1
 5 32 17 2 1 1
 5 32 17 3 1 1
 5 32 17 4 1 1
 5 32 18 1 1 1
 5 32 18 2 2 1
 5 32 18 3 1 1
 5 32 18 4 1 1
 5 32 19 1 1 1
 5 32 19 2 2 1
 5 32 19 3 1 1
 5 32 19 4 2 1
 5 32 20 1 2 1
 5 32 20 2 2 1
 5 32 20 3 2 1
 5 32 20 4 1 1
 5 32 21 1 1 1
 5 32 21 2 2 1
 5 32 21 3 2 1
 5 32 21 4 1 1
 5 32 22 1 1 1
 5 32 22 2 1 1
 5 32 22 3 1 1
 5 32 22 4 1 1
 5 32 23 1 1 1
 5 32 23 2 2 1
 5 32 23 3 1 1
 5 32 23 4 1 1
 5 32 24 1 1 1
 5 32 24 2 1 1
 5 32 24 3 1 1
 5 32 24 4 1 1
 5 32 25 1 2 1
 5 32 25 2 1 1
 5 32 25 3 1 1
 5 32 25 4 2 1
 5 32 26 1 1 1
 5 32 26 2 1 1
 5 32 26 3 2 1
 5 32 26 4 2 1
 5 32 27 1 1 1
 5 32 27 2 1 1
 5 32 27 3 1 1
 5 32 27 4 1 1
 5 32 28 1 1 1
 5 32 28 2 1 1
 5 32 28 3 1 1
 5 32 28 4 1 1
 5 32 29 1 2 1
 5 32 29 2 1 1
 5 32 29 3 1 1
 5 32 29 4 2 1
 5 32 30 1 2 1
 5 32 30 2 1 1
 5 32 30 3 1 1
 5 32 30 4 2 1
 5 32 31 1 1 1
 5 32 31 2 1 1
 5 32 31 3 1 1
 5 32 31 4 1 1
 5 32 32 1 2 1
 5 32 32 2 1 1
 5 32 32 3 2 1
 5 32 32 4 1 1
 6 1 1 1 1 1
 6 1 1 2 1 1
 6 1 1 3 2 1
 6 1 1 4 1 1
 6 1 2 1 2 1
 6 1 2 2 1 1
 6 1 2 3 1 1
 6 1 2 4 1 1
 6 1 3 1 2 1
 6 1 3 2 2 1
 6 1 3 3 2 1
 6 1 3 4 1 1
 6 1 4 1 1 1
 6 1 4 2 2 1
 6 1 4 3 1 1
 6 1 4 4 2 1
 6 1 5 1 1 1
 6 1 5 2 1 1
 6 1 5 3 1 1
 6 1 5 4 1 1
 6 1 6 1 1 1
 6 1 6 2 1 1
 6 1 6 3 2 1
 6 1 6 4 1 1
 6 1 7 1 1 1
 6 1 7 2 1 1
 6 1 7 3 1 1
 6 1 7 4 1 1
 6 1 8 1 1 1
 6 1 8 2 2 1
 6 1 8 3 1 1
 6 1 8 4 1 1
 6 1 9 1 1 1
 6 1 9 2 2 1
 6 1 9 3 1 1
 6 1 9 4 1 1
 6 1 10 1 1 1
 6 1 10 2 1 1
 6 1 10 3 1 1
 6 1 10 4 1 1
 6 1 11 1 1 1
 6 1 11 2 1 1
 6 1 11 3 1 1
 6 1 11 4 1 1
 6 1 12 1 1 1
 6 1 12 2 1 1
 6 1 12 3 1 1
 6 1 12 4 1 1
 6 1 13 1 1 1
 6 1 13 2 2 1
 6 1 13 3 1 1
 6 1 13 4 2 1
 6 1 14 1 2 1
 6 1 14 2 1 1
 6 1 14 3 1 1
 6 1 14 4 1 1
 6 1 15 1 2 1
 6 1 15 2 1 1
 6 1 15 3 1 1
 6 1 15 4 1 1
 6 1 16 1 1 1
 6 1 16 2 2 1
 6 1 16 3 1 1
 6 1 16 4 1 1
 6 1 17 1 1 1
 6 1 17 2 1 1
 6 1 17 3 2 1
 6 1 17 4 1 1
 6 1 18 1 1 1
 6 1 18 2 1 1
 6 1 18 3 1 1
 6 1 18 4 1 1
 6 1 19 1 1 1
 6 1 19 2 2 1
 6 1 19 3 2 1
 6 1 19 4 1 1
 6 1 20 1 1 1
 6 1 20 2 1 1
 6 1 20 3 2 1
 6 1 20 4 1 1
 6 1 21 1 2 1
 6 1 21 2 2 1
 6 1 21 3 2 1
 6 1 21 4 2 1
 6 1 22 1 2 1
 6 1 22 2 2 1
 6 1 22 3 2 1
 6 1 22 4 1 1
 6 1 23 1 1 1
 6 1 23 2 1 1
 6 1 23 3 2 1
 6 1 23 4 2 1
 6 1 24 1 2 1
 6 1 24 2 1 1
 6 1 24 3 2 1
 6 1 24 4 2 1
 6 1 25 1 1 1
 6 1 25 2 2 1
 6 1 25 3 1 1
 6 1 25 4 1 1
 6 1 26 1 2 1
 6 1 26 2 2 1
 6 1 26 3 1 1
 6 1 26 4 1 1
 6 1 27 1 1 1
 6 1 27 2 1 1
 6 1 27 3 2 1
 6 1 27 4 2 1
 6 1 28 1 1 1
 6 1 28 2 1 1
 6 1 28 3 1 1
 6 1 28 4 1 1
 6 1 29 1 1 1
 6 1 29 2 1 1
 6 1 29 3 1 1
 6 1 29 4 1 1
 6 1 30 1 2 1
 6 1 30 2 1 1
 6 1 30 3 2 1
 6 1 30 4 1 1
 6 1 31 1 1 1
 6 1 31 2 2 1
 6 1 31 3 1 1
 6 1 31 4 2 1
 6 1 32 1 1 1
 6 1 32 2 2 1
 6 1 32 3 1 1
 6 1 32 4 2 1
 6 2 1 1 1 1
 6 2 1 2 1 1
 6 2 1 3 1 1
 6 2 1 4 1 1
 6 2 2 1 1 1
 6 2 2 2 1 1
 6 2 2 3 1 1
 6 2 2 4 1 1
 6 2 3 1 2 1
 6 2 3 2 2 1
 6 2 3 3 1 1
 6 2 3 4 1 1
 6 2 4 1 1 1
 6 2 4 2 1 1
 6 2 4 3 1 1
 6 2 4 4 1 1
 6 2 5 1 1 1
 6 2 5 2 1 1
 6 2 5 3 1 1
 6 2 5 4 2 1
 6 2 6 1 1 1
 6 2 6 2 1 1
 6 2 6 3 1 1
 6 2 6 4 1 1
 6 2 7 1 1 1
 6 2 7 2 2 1
 6 2 7 3 1 1
 6 2 7 4 1 1
 6 2 8 1 1 1
 6 2 8 2 1 1
 6 2 8 3 1 1
 6 2 8 4 1 1
 6 2 9 1 1 1
 6 2 9 2 2 1
 6 2 9 3 2 1
 6 2 9 4 2 1
 6 2 10 1 1 1
 6 2 10 2 2 1
 6 2 10 3 1 1
 6 2 10 4 2 1
 6 2 11 1 2 1
 6 2 11 2 1 1
 6 2 11 3 2 1
 6 2 11 4 2 1
 6 2 12 1 1 1
 6 2 12 2 2 1
 6 2 12 3 1 1
 6 2 12 4 2 1
 6 2 13 1 1 1
 6 2 13 2 1 1
 6 2 13 3 1 1
 6 2 13 4 1 1
 6 2 14 1 1 1
 6 2 14 2 1 1
 6 2 14 3 1 1
 6 2 14 4 1 1
 6 2 15 1 1 1
 6 2 15 2 2 1
 6 2 15 3 2 1
 6 2 15 4 1 1
 6 2 16 1 2 1
 6 2 16 2 1 1
 6 2 16 3 2 1
 6 2 16 4 2 1
 6 2 17 1 2 1
 6 2 17 2 1 1
 6 2 17 3 2 1
 6 2 17 4 1 1
 6 2 18 1 1 1
 6 2 18 2 1 1
 6 2 18 3 1 1
 6 2 18 4 2 1
 6 2 19 1 2 1
 6 2 19 2 2 1
 6 2 19 3 1 1
 6 2 19 4 2 1
 6 2 20 1 1 1
 6 2 20 2 2 1
 6 2 20 3 2 1
 6 2 20 4 1 1
 6 2 21 1 2 1
 6 2 21 2 1 1
 6 2 21 3 1 1
 6 2 21 4 1 1
 6 2 22 1 2 1
 6 2 22 2 2 1
 6 2 22 3 1 1
 6 2 22 4 2 1
 6 2 23 1 2 1
 6 2 23 2 2 1
 6 2 23 3 1 1
 6 2 23 4 1 1
 6 2 24 1 1 1
 6 2 24 2 2 1
 6 2 24 3 1 1
 6 2 24 4 1 1
 6 2 25 1 1 1
 6 2 25 2 1 1
 6 2 25 3 1 1
 6 2 25 4 1 1
 6 2 26 1 1 1
 6 2 26 2 2 1
 6 2 26 3 1 1
 6 2 26 4 1 1
 6 2 27 1 2 1
 6 2 27 2 1 1
 6 2 27 3 1 1
 6 2 27 4 1 1
 6 2 28 1 1 1
 6 2 28 2 1 1
 6 2 28 3 1 1
 6 2 28 4 2 1
 6 2 29 1 2 1
 6 2 29 2 1 1
 6 2 29 3 1 1
 6 2 29 4 1 1
 6 2 30 1 2 1
 6 2 30 2 1 1
 6 2 30 3 2 1
 6 2 30 4 1 1
 6 2 31 1 1 1
 6 2 31 2 1 1
 6 2 31 3 1 1
 6 2 31 4 1 1
 6 2 32 1 2 1
 6 2 32 2 1 1
 6 2 32 3 2 1
 6 2 32 4 1 1
 6 3 1 1 2 1
 6 3 1 2 1 1
 6 3 1 3 1 1
 6 3 1 4 2 1
 6 3 2 1 1 1
 6 3 2 2 1 1
 6 3 2 3 2 1
 6 3 2 4 2 1
 6 3 3 1 1 1
 6 3 3 2 1 1
 6 3 3 3 1 1
 6 3 3 4 2 1
 6 3 4 1 2 1
 6 3 4 2 2 1
 6 3 4 3 2 1
 6 3 4 4 2 1
 6 3 5 1 1 1
 6 3 5 2 1 1
 6 3 5 3 1 1
 6 3 5 4 1 1
 6 3 6 1 1 1
 6 3 6 2 1 1
 6 3 6 3 2 1
 6 3 6 4 1 1
 6 3 7 1 1 1
 6 3 7 2 1 1
 6 3 7 3 2 1
 6 3 7 4 1 1
 6 3 8 1 1 1
 6 3 8 2 1 1
 6 3 8 3 1 1
 6 3 8 4 1 1
 6 3 9 1 2 1
 6 3 9 2 1 1
 6 3 9 3 1 1
 6 3 9 4 1 1
 6 3 10 1 1 1
 6 3 10 2 1 1
 6 3 10 3 1 1
 6 3 10 4 1 1
 6 3 11 1 1 1
 6 3 11 2 1 1
 6 3 11 3 1 1
 6 3 11 4 1 1
 6 3 12 1 1 1
 6 3 12 2 1 1
 6 3 12 3 2 1
 6 3 12 4 1 1
 6 3 13 1 1 1
 6 3 13 2 2 1
 6 3 13 3 2 1
 6 3 13 4 1 1
 6 3 14 1 2 1
 6 3 14 2 1 1
 6 3 14 3 1 1
 6 3 14 4 1 1
 6 3 15 1 1 1
 6 3 15 2 2 1
 6 3 15 3 2 1
 6 3 15 4 2 1
 6 3 16 1 1 1
 6 3 16 2 2 1
 6 3 16 3 1 1
 6 3 16 4 2 1
 6 3 17 1 1 1
 6 3 17 2 1 1
 6 3 17 3 1 1
 6 3 17 4 1 1
 6 3 18 1 1 1
 6 3 18 2 1 1
 6 3 18 3 1 1
 6 3 18 4 1 1
 6 3 19 1 1 1
 6 3 19 2 2 1
 6 3 19 3 1 1
 6 3 19 4 1 1
 6 3 20 1 1 1
 6 3 20 2 2 1
 6 3 20 3 2 1
 6 3 20 4 2 1
 6 3 21 1 2 1
 6 3 21 2 1 1
 6 3 21 3 2 1
 6 3 21 4 1 1
 6 3 22 1 1 1
 6 3 22 2 2 1
 6 3 22 3 1 1
 6 3 22 4 1 1
 6 3 23 1 2 1
 6 3 23 2 1 1
 6 3 23 3 1 1
 6 3 23 4 1 1
 6 3 24 1 2 1
 6 3 24 2 1 1
 6 3 24 3 2 1
 6 3 24 4 1 1
 6 3 25 1 1 1
 6 3 25 2 1 1
 6 3 25 3 2 1
 6 3 25 4 1 1
 6 3 26 1 1 1
 6 3 26 2 1 1
 6 3 26 3 2 1
 6 3 26 4 1 1
 6 3 27 1 1 1
 6 3 27 2 1 1
 6 3 27 3 1 1
 6 3 27 4 2 1
 6 3 28 1 2 1
 6 3 28 2 1 1
 6 3 28 3 1 1
 6 3 28 4 2 1
 6 3 29 1 1 1
 6 3 29 2 1 1
 6 3 29 3 1 1
 6 3 29 4 1 1
 6 3 30 1 1 1
 6 3 30 2 2 1
 6 3 30 3 1 1
 6 3 30 4 1 1
 6 3 31 1 1 1
 6 3 31 2 1 1
 6 3 31 3 1 1
 6 3 31 4 1 1
 6 3 32 1 1 1
 6 3 32 2 1 1
 6 3 32 3 2 1
 6 3 32 4 1 1
 6 4 1 1 1 1
 6 4 1 2 1 1
 6 4 1 3 2 1
 6 4 1 4 1 1
 6 4 2 1 2 1
 6 4 2 2 1 1
 6 4 2 3 2 1
 6 4 2 4 1 1
 6 4 3 1 1 1
 6 4 3 2 1 1
 6 4 3 3 1 1
 6 4 3 4 2 1
 6 4 4 1 1 1
 6 4 4 2 1 1
 6 4 4 3 1 1
 6 4 4 4 1 1
 6 4 5 1 1 1
 6 4 5 2 2 1
 6 4 5 3 1 1
 6 4 5 4 1 1
 6 4 6 1 2 1
 6 4 6 2 2 1
 6 4 6 3 2 1
 6 4 6 4 2 1
 6 4 7 1 1 1
 6 4 7 2 2 1
 6 4 7 3 1 1
 6 4 7 4 1 1
 6 4 8 1 1 1
 6 4 8 2 1 1
 6 4 8 3 1 1
 6 4 8 4 2 1
 6 4 9 1 1 1
 6 4 9 2 1 1
 6 4 9 3 1 1
 6 4 9 4 1 1
 6 4 10 1 2 1
 6 4 10 2 1 1
 6 4 10 3 2 1
 6 4 10 4 2 1
 6 4 11 1 1 1
 6 4 11 2 1 1
 6 4 11 3 1 1
 6 4 11 4 2 1
 6 4 12 1 1 1
 6 4 12 2 2 1
 6 4 12 3 1 1
 6 4 12 4 1 1
 6 4 13 1 1 1
 6 4 13 2 1 1
 6 4 13 3 2 1
 6 4 13 4 2 1
 6 4 14 1 2 1
 6 4 14 2 2 1
 6 4 14 3 1 1
 6 4 14 4 1 1
 6 4 15 1 1 1
 6 4 15 2 2 1
 6 4 15 3 2 1
 6 4 15 4 1 1
 6 4 16 1 2 1
 6 4 16 2 1 1
 6 4 16 3 2 1
 6 4 16 4 1 1
 6 4 17 1 2 1
 6 4 17 2 1 1
 6 4 17 3 1 1
 6 4 17 4 2 1
 6 4 18 1 1 1
 6 4 18 2 1 1
 6 4 18 3 1 1
 6 4 18 4 2 1
 6 4 19 1 2 1
 6 4 19 2 1 1
 6 4 19 3 1 1
 6 4 19 4 2 1
 6 4 20 1 1 1
 6 4 20 2 1 1
 6 4 20 3 2 1
 6 4 20 4 1 1
 6 4 21 1 1 1
 6 4 21 2 1 1
 6 4 21 3 2 1
 6 4 21 4 2 1
 6 4 22 1 2 1
 6 4 22 2 1 1
 6 4 22 3 2 1
 6 4 22 4 1 1
 6 4 23 1 2 1
 6 4 23 2 1 1
 6 4 23 3 1 1
 6 4 23 4 2 1
 6 4 24 1 2 1
 6 4 24 2 1 1
 6 4 24 3 1 1
 6 4 24 4 2 1
 6 4 25 1 1 1
 6 4 25 2 1 1
 6 4 25 3 1 1
 6 4 25 4 2 1
 6 4 26 1 1 1
 6 4 26 2 2 1
 6 4 26 3 2 1
 6 4 26 4 1 1
 6 4 27 1 1 1
 6 4 27 2 2 1
 6 4 27 3 1 1
 6 4 27 4 1 1
 6 4 28 1 1 1
 6 4 28 2 1 1
 6 4 28 3 2 1
 6 4 28 4 2 1
 6 4 29 1 2 1
 6 4 29 2 2 1
 6 4 29 3 1 1
 6 4 29 4 2 1
 6 4 30 1 1 1
 6 4 30 2 2 1
 6 4 30 3 1 1
 6 4 30 4 1 1
 6 4 31 1 1 1
 6 4 31 2 1 1
 6 4 31 3 2 1
 6 4 31 4 2 1
 6 4 32 1 1 1
 6 4 32 2 1 1
 6 4 32 3 1 1
 6 4 32 4 1 1
 6 5 1 1 1 1
 6 5 1 2 1 1
 6 5 1 3 2 1
 6 5 1 4 1 1
 6 5 2 1 1 1
 6 5 2 2 2 1
 6 5 2 3 1 1
 6 5 2 4 1 1
 6 5 3 1 1 1
 6 5 3 2 1 1
 6 5 3 3 1 1
 6 5 3 4 1 1
 6 5 4 1 2 1
 6 5 4 2 1 1
 6 5 4 3 2 1
 6 5 4 4 1 1
 6 5 5 1 1 1
 6 5 5 2 1 1
 6 5 5 3 1 1
 6 5 5 4 1 1
 6 5 6 1 1 1
 6 5 6 2 1 1
 6 5 6 3 1 1
 6 5 6 4 2 1
 6 5 7 1 1 1
 6 5 7 2 1 1
 6 5 7 3 1 1
 6 5 7 4 1 1
 6 5 8 1 2 1
 6 5 8 2 1 1
 6 5 8 3 1 1
 6 5 8 4 1 1
 6 5 9 1 1 1
 6 5 9 2 2 1
 6 5 9 3 1 1
 6 5 9 4 1 1
 6 5 10 1 1 1
 6 5 10 2 1 1
 6 5 10 3 1 1
 6 5 10 4 1 1
 6 5 11 1 2 1
 6 5 11 2 1 1
 6 5 11 3 1 1
 6 5 11 4 1 1
 6 5 12 1 1 1
 6 5 12 2 2 1
 6 5 12 3 1 1
 6 5 12 4 1 1
 6 5 13 1 2 1
 6 5 13 2 1 1
 6 5 13 3 1 1
 6 5 13 4 1 1
 6 5 14 1 1 1
 6 5 14 2 2 1
 6 5 14 3 1 1
 6 5 14 4 1 1
 6 5 15 1 2 1
 6 5 15 2 1 1
 6 5 15 3 1 1
 6 5 15 4 1 1
 6 5 16 1 2 1
 6 5 16 2 2 1
 6 5 16 3 1 1
 6 5 16 4 2 1
 6 5 17 1 1 1
 6 5 17 2 1 1
 6 5 17 3 1 1
 6 5 17 4 1 1
 6 5 18 1 1 1
 6 5 18 2 1 1
 6 5 18 3 1 1
 6 5 18 4 2 1
 6 5 19 1 1 1
 6 5 19 2 2 1
 6 5 19 3 1 1
 6 5 19 4 1 1
 6 5 20 1 1 1
 6 5 20 2 1 1
 6 5 20 3 1 1
 6 5 20 4 1 1
 6 5 21 1 2 1
 6 5 21 2 2 1
 6 5 21 3 1 1
 6 5 21 4 1 1
 6 5 22 1 1 1
 6 5 22 2 1 1
 6 5 22 3 1 1
 6 5 22 4 1 1
 6 5 23 1 1 1
 6 5 23 2 1 1
 6 5 23 3 1 1
 6 5 23 4 2 1
 6 5 24 1 1 1
 6 5 24 2 1 1
 6 5 24 3 1 1
 6 5 24 4 1 1
 6 5 25 1 1 1
 6 5 25 2 1 1
 6 5 25 3 1 1
 6 5 25 4 1 1
 6 5 26 1 1 1
 6 5 26 2 2 1
 6 5 26 3 1 1
 6 5 26 4 1 1
 6 5 27 1 1 1
 6 5 27 2 1 1
 6 5 27 3 1 1
 6 5 27 4 2 1
 6 5 28 1 1 1
 6 5 28 2 2 1
 6 5 28 3 2 1
 6 5 28 4 1 1
 6 5 29 1 2 1
 6 5 29 2 2 1
 6 5 29 3 1 1
 6 5 29 4 2 1
 6 5 30 1 1 1
 6 5 30 2 1 1
 6 5 30 3 2 1
 6 5 30 4 1 1
 6 5 31 1 2 1
 6 5 31 2 2 1
 6 5 31 3 1 1
 6 5 31 4 2 1
 6 5 32 1 2 1
 6 5 32 2 1 1
 6 5 32 3 1 1
 6 5 32 4 2 1
 6 6 1 1 2 1
 6 6 1 2 1 1
 6 6 1 3 1 1
 6 6 1 4 1 1
 6 6 2 1 1 1
 6 6 2 2 1 1
 6 6 2 3 1 1
 6 6 2 4 2 1
 6 6 3 1 1 1
 6 6 3 2 1 1
 6 6 3 3 2 1
 6 6 3 4 1 1
 6 6 4 1 1 1
 6 6 4 2 1 1
 6 6 4 3 1 1
 6 6 4 4 1 1
 6 6 5 1 2 1
 6 6 5 2 2 1
 6 6 5 3 1 1
 6 6 5 4 2 1
 6 6 6 1 1 1
 6 6 6 2 2 1
 6 6 6 3 2 1
 6 6 6 4 1 1
 6 6 7 1 2 1
 6 6 7 2 1 1
 6 6 7 3 1 1
 6 6 7 4 1 1
 6 6 8 1 2 1
 6 6 8 2 2 1
 6 6 8 3 1 1
 6 6 8 4 1 1
 6 6 9 1 1 1
 6 6 9 2 2 1
 6 6 9 3 1 1
 6 6 9 4 1 1
 6 6 10 1 1 1
 6 6 10 2 1 1
 6 6 10 3 2 1
 6 6 10 4 2 1
 6 6 11 1 1 1
 6 6 11 2 1 1
 6 6 11 3 2 1
 6 6 11 4 1 1
 6 6 12 1 1 1
 6 6 12 2 1 1
 6 6 12 3 1 1
 6 6 12 4 1 1
 6 6 13 1 1 1
 6 6 13 2 2 1
 6 6 13 3 1 1
 6 6 13 4 2 1
 6 6 14 1 1 1
 6 6 14 2 1 1
 6 6 14 3 1 1
 6 6 14 4 2 1
 6 6 15 1 2 1
 6 6 15 2 2 1
 6 6 15 3 1 1
 6 6 15 4 2 1
 6 6 16 1 2 1
 6 6 16 2 1 1
 6 6 16 3 1 1
 6 6 16 4 1 1
 6 6 17 1 2 1
 6 6 17 2 1 1
 6 6 17 3 1 1
 6 6 17 4 1 1
 6 6 18 1 1 1
 6 6 18 2 1 1
 6 6 18 3 2 1
 6 6 18 4 1 1
 6 6 19 1 1 1
 6 6 19 2 1 1
 6 6 19 3 2 1
 6 6 19 4 2 1
 6 6 20 1 1 1
 6 6 20 2 1 1
 6 6 20 3 1 1
 6 6 20 4 1 1
 6 6 21 1 2 1
 6 6 21 2 2 1
 6 6 21 3 1 1
 6 6 21 4 1 1
 6 6 22 1 2 1
 6 6 22 2 2 1
 6 6 22 3 1 1
 6 6 22 4 1 1
 6 6 23 1 2 1
 6 6 23 2 1 1
 6 6 23 3 1 1
 6 6 23 4 2 1
 6 6 24 1 1 1
 6 6 24 2 1 1
 6 6 24 3 1 1
 6 6 24 4 1 1
 6 6 25 1 2 1
 6 6 25 2 1 1
 6 6 25 3 1 1
 6 6 25 4 2 1
 6 6 26 1 2 1
 6 6 26 2 1 1
 6 6 26 3 1 1
 6 6 26 4 2 1
 6 6 27 1 1 1
 6 6 27 2 1 1
 6 6 27 3 1 1
 6 6 27 4 1 1
 6 6 28 1 2 1
 6 6 28 2 1 1
 6 6 28 3 1 1
 6 6 28 4 1 1
 6 6 29 1 1 1
 6 6 29 2 2 1
 6 6 29 3 1 1
 6 6 29 4 1 1
 6 6 30 1 2 1
 6 6 30 2 1 1
 6 6 30 3 1 1
 6 6 30 4 1 1
 6 6 31 1 1 1
 6 6 31 2 1 1
 6 6 31 3 1 1
 6 6 31 4 1 1
 6 6 32 1 1 1
 6 6 32 2 2 1
 6 6 32 3 1 1
 6 6 32 4 2 1
 6 7 1 1 1 1
 6 7 1 2 1 1
 6 7 1 3 2 1
 6 7 1 4 2 1
 6 7 2 1 1 1
 6 7 2 2 1 1
 6 7 2 3 1 1
 6 7 2 4 2 1
 6 7 3 1 1 1
 6 7 3 2 1 1
 6 7 3 3 1 1
 6 7 3 4 2 1
 6 7 4 1 1 1
 6 7 4 2 1 1
 6 7 4 3 1 1
 6 7 4 4 2 1
 6 7 5 1 2 1
 6 7 5 2 1 1
 6 7 5 3 2 1
 6 7 5 4 1 1
 6 7 6 1 1 1
 6 7 6 2 2 1
 6 7 6 3 1 1
 6 7 6 4 1 1
 6 7 7 1 1 1
 6 7 7 2 1 1
 6 7 7 3 2 1
 6 7 7 4 1 1
 6 7 8 1 1 1
 6 7 8 2 1 1
 6 7 8 3 1 1
 6 7 8 4 1 1
 6 7 9 1 1 1
 6 7 9 2 1 1
 6 7 9 3 2 1
 6 7 9 4 2 1
 6 7 10 1 1 1
 6 7 10 2 1 1
 6 7 10 3 1 1
 6 7 10 4 1 1
 6 7 11 1 1 1
 6 7 11 2 1 1
 6 7 11 3 1 1
 6 7 11 4 2 1
 6 7 12 1 2 1
 6 7 12 2 1 1
 6 7 12 3 1 1
 6 7 12 4 2 1
 6 7 13 1 1 1
 6 7 13 2 2 1
 6 7 13 3 2 1
 6 7 13 4 1 1
 6 7 14 1 1 1
 6 7 14 2 1 1
 6 7 14 3 1 1
 6 7 14 4 2 1
 6 7 15 1 1 1
 6 7 15 2 1 1
 6 7 15 3 1 1
 6 7 15 4 1 1
 6 7 16 1 2 1
 6 7 16 2 2 1
 6 7 16 3 1 1
 6 7 16 4 2 1
 6 7 17 1 1 1
 6 7 17 2 1 1
 6 7 17 3 1 1
 6 7 17 4 1 1
 6 7 18 1 1 1
 6 7 18 2 1 1
 6 7 18 3 1 1
 6 7 18 4 1 1
 6 7 19 1 1 1
 6 7 19 2 1 1
 6 7 19 3 1 1
 6 7 19 4 1 1
 6 7 20 1 1 1
 6 7 20 2 2 1
 6 7 20 3 2 1
 6 7 20 4 1 1
 6 7 21 1 1 1
 6 7 21 2 1 1
 6 7 21 3 1 1
 6 7 21 4 2 1
 6 7 22 1 2 1
 6 7 22 2 1 1
 6 7 22 3 2 1
 6 7 22 4 1 1
 6 7 23 1 1 1
 6 7 23 2 1 1
 6 7 23 3 1 1
 6 7 23 4 1 1
 6 7 24 1 1 1
 6 7 24 2 1 1
 6 7 24 3 1 1
 6 7 24 4 2 1
 6 7 25 1 1 1
 6 7 25 2 2 1
 6 7 25 3 1 1
 6 7 25 4 1 1
 6 7 26 1 1 1
 6 7 26 2 1 1
 6 7 26 3 1 1
 6 7 26 4 1 1
 6 7 27 1 1 1
 6 7 27 2 2 1
 6 7 27 3 2 1
 6 7 27 4 1 1
 6 7 28 1 1 1
 6 7 28 2 2 1
 6 7 28 3 1 1
 6 7 28 4 2 1
 6 7 29 1 2 1
 6 7 29 2 1 1
 6 7 29 3 1 1
 6 7 29 4 1 1
 6 7 30 1 1 1
 6 7 30 2 1 1
 6 7 30 3 1 1
 6 7 30 4 1 1
 6 7 31 1 1 1
 6 7 31 2 2 1
 6 7 31 3 1 1
 6 7 31 4 1 1
 6 7 32 1 1 1
 6 7 32 2 1 1
 6 7 32 3 1 1
 6 7 32 4 1 1
 6 8 1 1 1 1
 6 8 1 2 1 1
 6 8 1 3 1 1
 6 8 1 4 1 1
 6 8 2 1 1 1
 6 8 2 2 1 1
 6 8 2 3 2 1
 6 8 2 4 1 1
 6 8 3 1 2 1
 6 8 3 2 1 1
 6 8 3 3 1 1
 6 8 3 4 1 1
 6 8 4 1 2 1
 6 8 4 2 1 1
 6 8 4 3 2 1
 6 8 4 4 1 1
 6 8 5 1 1 1
 6 8 5 2 1 1
 6 8 5 3 1 1
 6 8 5 4 1 1
 6 8 6 1 2 1
 6 8 6 2 1 1
 6 8 6 3 1 1
 6 8 6 4 2 1
 6 8 7 1 1 1
 6 8 7 2 2 1
 6 8 7 3 1 1
 6 8 7 4 1 1
 6 8 8 1 2 1
 6 8 8 2 2 1
 6 8 8 3 1 1
 6 8 8 4 1 1
 6 8 9 1 1 1
 6 8 9 2 1 1
 6 8 9 3 2 1
 6 8 9 4 2 1
 6 8 10 1 1 1
 6 8 10 2 1 1
 6 8 10 3 1 1
 6 8 10 4 2 1
 6 8 11 1 1 1
 6 8 11 2 1 1
 6 8 11 3 1 1
 6 8 11 4 2 1
 6 8 12 1 1 1
 6 8 12 2 1 1
 6 8 12 3 1 1
 6 8 12 4 1 1
 6 8 13 1 1 1
 6 8 13 2 2 1
 6 8 13 3 1 1
 6 8 13 4 2 1
 6 8 14 1 1 1
 6 8 14 2 1 1
 6 8 14 3 1 1
 6 8 14 4 1 1
 6 8 15 1 1 1
 6 8 15 2 1 1
 6 8 15 3 1 1
 6 8 15 4 1 1
 6 8 16 1 1 1
 6 8 16 2 1 1
 6 8 16 3 1 1
 6 8 16 4 1 1
 6 8 17 1 1 1
 6 8 17 2 1 1
 6 8 17 3 2 1
 6 8 17 4 2 1
 6 8 18 1 1 1
 6 8 18 2 1 1
 6 8 18 3 1 1
 6 8 18 4 2 1
 6 8 19 1 1 1
 6 8 19 2 1 1
 6 8 19 3 1 1
 6 8 19 4 1 1
 6 8 20 1 1 1
 6 8 20 2 1 1
 6 8 20 3 1 1
 6 8 20 4 2 1
 6 8 21 1 1 1
 6 8 21 2 2 1
 6 8 21 3 1 1
 6 8 21 4 1 1
 6 8 22 1 1 1
 6 8 22 2 1 1
 6 8 22 3 2 1
 6 8 22 4 1 1
 6 8 23 1 1 1
 6 8 23 2 1 1
 6 8 23 3 1 1
 6 8 23 4 2 1
 6 8 24 1 1 1
 6 8 24 2 1 1
 6 8 24 3 2 1
 6 8 24 4 1 1
 6 8 25 1 2 1
 6 8 25 2 1 1
 6 8 25 3 1 1
 6 8 25 4 2 1
 6 8 26 1 2 1
 6 8 26 2 2 1
 6 8 26 3 2 1
 6 8 26 4 2 1
 6 8 27 1 2 1
 6 8 27 2 1 1
 6 8 27 3 1 1
 6 8 27 4 1 1
 6 8 28 1 1 1
 6 8 28 2 1 1
 6 8 28 3 1 1
 6 8 28 4 1 1
 6 8 29 1 1 1
 6 8 29 2 2 1
 6 8 29 3 1 1
 6 8 29 4 2 1
 6 8 30 1 1 1
 6 8 30 2 1 1
 6 8 30 3 2 1
 6 8 30 4 1 1
 6 8 31 1 1 1
 6 8 31 2 1 1
 6 8 31 3 1 1
 6 8 31 4 1 1
 6 8 32 1 1 1
 6 8 32 2 1 1
 6 8 32 3 2 1
 6 8 32 4 1 1
 6 9 1 1 1 1
 6 9 1 2 1 1
 6 9 1 3 1 1
 6 9 1 4 1 1
 6 9 2 1 1 1
 6 9 2 2 1 1
 6 9 2 3 2 1
 6 9 2 4 1 1
 6 9 3 1 1 1
 6 9 3 2 1 1
 6 9 3 3 1 1
 6 9 3 4 2 1
 6 9 4 1 1 1
 6 9 4 2 1 1
 6 9 4 3 1 1
 6 9 4 4 1 1
 6 9 5 1 2 1
 6 9 5 2 1 1
 6 9 5 3 1 1
 6 9 5 4 2 1
 6 9 6 1 1 1
 6 9 6 2 2 1
 6 9 6 3 2 1
 6 9 6 4 1 1
 6 9 7 1 1 1
 6 9 7 2 2 1
 6 9 7 3 1 1
 6 9 7 4 1 1
 6 9 8 1 2 1
 6 9 8 2 1 1
 6 9 8 3 1 1
 6 9 8 4 1 1
 6 9 9 1 1 1
 6 9 9 2 1 1
 6 9 9 3 2 1
 6 9 9 4 1 1
 6 9 10 1 1 1
 6 9 10 2 1 1
 6 9 10 3 2 1
 6 9 10 4 1 1
 6 9 11 1 1 1
 6 9 11 2 1 1
 6 9 11 3 2 1
 6 9 11 4 2 1
 6 9 12 1 1 1
 6 9 12 2 1 1
 6 9 12 3 2 1
 6 9 12 4 2 1
 6 9 13 1 1 1
 6 9 13 2 1 1
 6 9 13 3 1 1
 6 9 13 4 1 1
 6 9 14 1 2 1
 6 9 14 2 2 1
 6 9 14 3 2 1
 6 9 14 4 1 1
 6 9 15 1 2 1
 6 9 15 2 1 1
 6 9 15 3 1 1
 6 9 15 4 1 1
 6 9 16 1 1 1
 6 9 16 2 1 1
 6 9 16 3 2 1
 6 9 16 4 2 1
 6 9 17 1 1 1
 6 9 17 2 1 1
 6 9 17 3 1 1
 6 9 17 4 1 1
 6 9 18 1 1 1
 6 9 18 2 1 1
 6 9 18 3 1 1
 6 9 18 4 1 1
 6 9 19 1 1 1
 6 9 19 2 1 1
 6 9 19 3 1 1
 6 9 19 4 1 1
 6 9 20 1 2 1
 6 9 20 2 1 1
 6 9 20 3 1 1
 6 9 20 4 2 1
 6 9 21 1 1 1
 6 9 21 2 1 1
 6 9 21 3 1 1
 6 9 21 4 2 1
 6 9 22 1 1 1
 6 9 22 2 2 1
 6 9 22 3 2 1
 6 9 22 4 1 1
 6 9 23 1 1 1
 6 9 23 2 1 1
 6 9 23 3 1 1
 6 9 23 4 1 1
 6 9 24 1 2 1
 6 9 24 2 2 1
 6 9 24 3 1 1
 6 9 24 4 1 1
 6 9 25 1 2 1
 6 9 25 2 2 1
 6 9 25 3 1 1
 6 9 25 4 1 1
 6 9 26 1 1 1
 6 9 26 2 2 1
 6 9 26 3 1 1
 6 9 26 4 2 1
 6 9 27 1 1 1
 6 9 27 2 2 1
 6 9 27 3 1 1
 6 9 27 4 1 1
 6 9 28 1 1 1
 6 9 28 2 1 1
 6 9 28 3 1 1
 6 9 28 4 2 1
 6 9 29 1 1 1
 6 9 29 2 1 1
 6 9 29 3 1 1
 6 9 29 4 2 1
 6 9 30 1 1 1
 6 9 30 2 1 1
 6 9 30 3 1 1
 6 9 30 4 1 1
 6 9 31 1 1 1
 6 9 31 2 2 1
 6 9 31 3 1 1
 6 9 31 4 2 1
 6 9 32 1 1 1
 6 9 32 2 1 1
 6 9 32 3 1 1
 6 9 32 4 1 1
 6 10 1 1 2 1
 6 10 1 2 2 1
 6 10 1 3 1 1
 6 10 1 4 1 1
 6 10 2 1 1 1
 6 10 2 2 2 1
 6 10 2 3 1 1
 6 10 2 4 1 1
 6 10 3 1 1 1
 6 10 3 2 2 1
 6 10 3 3 2 1
 6 10 3 4 1 1
 6 10 4 1 2 1
 6 10 4 2 1 1
 6 10 4 3 1 1
 6 10 4 4 2 1
 6 10 5 1 1 1
 6 10 5 2 1 1
 6 10 5 3 1 1
 6 10 5 4 1 1
 6 10 6 1 1 1
 6 10 6 2 1 1
 6 10 6 3 1 1
 6 10 6 4 2 1
 6 10 7 1 1 1
 6 10 7 2 1 1
 6 10 7 3 1 1
 6 10 7 4 2 1
 6 10 8 1 2 1
 6 10 8 2 2 1
 6 10 8 3 1 1
 6 10 8 4 1 1
 6 10 9 1 1 1
 6 10 9 2 1 1
 6 10 9 3 2 1
 6 10 9 4 1 1
 6 10 10 1 1 1
 6 10 10 2 1 1
 6 10 10 3 2 1
 6 10 10 4 1 1
 6 10 11 1 2 1
 6 10 11 2 2 1
 6 10 11 3 1 1
 6 10 11 4 2 1
 6 10 12 1 2 1
 6 10 12 2 1 1
 6 10 12 3 1 1
 6 10 12 4 1 1
 6 10 13 1 1 1
 6 10 13 2 1 1
 6 10 13 3 2 1
 6 10 13 4 2 1
 6 10 14 1 1 1
 6 10 14 2 1 1
 6 10 14 3 1 1
 6 10 14 4 1 1
 6 10 15 1 2 1
 6 10 15 2 2 1
 6 10 15 3 1 1
 6 10 15 4 1 1
 6 10 16 1 1 1
 6 10 16 2 2 1
 6 10 16 3 1 1
 6 10 16 4 1 1
 6 10 17 1 1 1
 6 10 17 2 1 1
 6 10 17 3 1 1
 6 10 17 4 1 1
 6 10 18 1 2 1
 6 10 18 2 1 1
 6 10 18 3 1 1
 6 10 18 4 2 1
 6 10 19 1 1 1
 6 10 19 2 1 1
 6 10 19 3 2 1
 6 10 19 4 2 1
 6 10 20 1 1 1
 6 10 20 2 2 1
 6 10 20 3 1 1
 6 10 20 4 2 1
 6 10 21 1 2 1
 6 10 21 2 1 1
 6 10 21 3 2 1
 6 10 21 4 1 1
 6 10 22 1 1 1
 6 10 22 2 1 1
 6 10 22 3 1 1
 6 10 22 4 1 1
 6 10 23 1 2 1
 6 10 23 2 1 1
 6 10 23 3 2 1
 6 10 23 4 2 1
 6 10 24 1 1 1
 6 10 24 2 1 1
 6 10 24 3 1 1
 6 10 24 4 2 1
 6 10 25 1 1 1
 6 10 25 2 1 1
 6 10 25 3 1 1
 6 10 25 4 2 1
 6 10 26 1 2 1
 6 10 26 2 1 1
 6 10 26 3 2 1
 6 10 26 4 2 1
 6 10 27 1 1 1
 6 10 27 2 2 1
 6 10 27 3 1 1
 6 10 27 4 2 1
 6 10 28 1 1 1
 6 10 28 2 1 1
 6 10 28 3 2 1
 6 10 28 4 1 1
 6 10 29 1 1 1
 6 10 29 2 2 1
 6 10 29 3 1 1
 6 10 29 4 1 1
 6 10 30 1 2 1
 6 10 30 2 1 1
 6 10 30 3 1 1
 6 10 30 4 2 1
 6 10 31 1 2 1
 6 10 31 2 1 1
 6 10 31 3 2 1
 6 10 31 4 1 1
 6 10 32 1 1 1
 6 10 32 2 1 1
 6 10 32 3 1 1
 6 10 32 4 2 1
 6 11 1 1 1 1
 6 11 1 2 1 1
 6 11 1 3 1 1
 6 11 1 4 1 1
 6 11 2 1 1 1
 6 11 2 2 1 1
 6 11 2 3 1 1
 6 11 2 4 1 1
 6 11 3 1 2 1
 6 11 3 2 1 1
 6 11 3 3 2 1
 6 11 3 4 1 1
 6 11 4 1 2 1
 6 11 4 2 1 1
 6 11 4 3 1 1
 6 11 4 4 2 1
 6 11 5 1 1 1
 6 11 5 2 1 1
 6 11 5 3 1 1
 6 11 5 4 1 1
 6 11 6 1 1 1
 6 11 6 2 1 1
 6 11 6 3 1 1
 6 11 6 4 2 1
 6 11 7 1 1 1
 6 11 7 2 2 1
 6 11 7 3 1 1
 6 11 7 4 1 1
 6 11 8 1 1 1
 6 11 8 2 1 1
 6 11 8 3 1 1
 6 11 8 4 1 1
 6 11 9 1 1 1
 6 11 9 2 1 1
 6 11 9 3 1 1
 6 11 9 4 1 1
 6 11 10 1 1 1
 6 11 10 2 1 1
 6 11 10 3 2 1
 6 11 10 4 1 1
 6 11 11 1 2 1
 6 11 11 2 1 1
 6 11 11 3 1 1
 6 11 11 4 2 1
 6 11 12 1 2 1
 6 11 12 2 1 1
 6 11 12 3 1 1
 6 11 12 4 2 1
 6 11 13 1 1 1
 6 11 13 2 1 1
 6 11 13 3 2 1
 6 11 13 4 1 1
 6 11 14 1 2 1
 6 11 14 2 1 1
 6 11 14 3 1 1
 6 11 14 4 1 1
 6 11 15 1 1 1
 6 11 15 2 1 1
 6 11 15 3 1 1
 6 11 15 4 2 1
 6 11 16 1 1 1
 6 11 16 2 1 1
 6 11 16 3 1 1
 6 11 16 4 1 1
 6 11 17 1 2 1
 6 11 17 2 2 1
 6 11 17 3 1 1
 6 11 17 4 1 1
 6 11 18 1 1 1
 6 11 18 2 1 1
 6 11 18 3 1 1
 6 11 18 4 2 1
 6 11 19 1 1 1
 6 11 19 2 1 1
 6 11 19 3 1 1
 6 11 19 4 1 1
 6 11 20 1 1 1
 6 11 20 2 2 1
 6 11 20 3 2 1
 6 11 20 4 1 1
 6 11 21 1 1 1
 6 11 21 2 1 1
 6 11 21 3 1 1
 6 11 21 4 1 1
 6 11 22 1 1 1
 6 11 22 2 1 1
 6 11 22 3 2 1
 6 11 22 4 2 1
 6 11 23 1 1 1
 6 11 23 2 2 1
 6 11 23 3 1 1
 6 11 23 4 1 1
 6 11 24 1 2 1
 6 11 24 2 1 1
 6 11 24 3 2 1
 6 11 24 4 1 1
 6 11 25 1 1 1
 6 11 25 2 1 1
 6 11 25 3 2 1
 6 11 25 4 2 1
 6 11 26 1 1 1
 6 11 26 2 1 1
 6 11 26 3 1 1
 6 11 26 4 1 1
 6 11 27 1 1 1
 6 11 27 2 1 1
 6 11 27 3 2 1
 6 11 27 4 1 1
 6 11 28 1 1 1
 6 11 28 2 2 1
 6 11 28 3 1 1
 6 11 28 4 1 1
 6 11 29 1 1 1
 6 11 29 2 1 1
 6 11 29 3 1 1
 6 11 29 4 1 1
 6 11 30 1 2 1
 6 11 30 2 1 1
 6 11 30 3 1 1
 6 11 30 4 2 1
 6 11 31 1 2 1
 6 11 31 2 1 1
 6 11 31 3 2 1
 6 11 31 4 1 1
 6 11 32 1 1 1
 6 11 32 2 1 1
 6 11 32 3 1 1
 6 11 32 4 2 1
 6 12 1 1 2 1
 6 12 1 2 1 1
 6 12 1 3 1 1
 6 12 1 4 2 1
 6 12 2 1 1 1
 6 12 2 2 1 1
 6 12 2 3 1 1
 6 12 2 4 1 1
 6 12 3 1 1 1
 6 12 3 2 1 1
 6 12 3 3 1 1
 6 12 3 4 1 1
 6 12 4 1 1 1
 6 12 4 2 2 1
 6 12 4 3 1 1
 6 12 4 4 1 1
 6 12 5 1 1 1
 6 12 5 2 2 1
 6 12 5 3 1 1
 6 12 5 4 2 1
 6 12 6 1 1 1
 6 12 6 2 1 1
 6 12 6 3 2 1
 6 12 6 4 1 1
 6 12 7 1 1 1
 6 12 7 2 2 1
 6 12 7 3 1 1
 6 12 7 4 1 1
 6 12 8 1 2 1
 6 12 8 2 2 1
 6 12 8 3 1 1
 6 12 8 4 2 1
 6 12 9 1 2 1
 6 12 9 2 2 1
 6 12 9 3 2 1
 6 12 9 4 2 1
 6 12 10 1 2 1
 6 12 10 2 2 1
 6 12 10 3 1 1
 6 12 10 4 1 1
 6 12 11 1 1 1
 6 12 11 2 1 1
 6 12 11 3 2 1
 6 12 11 4 1 1
 6 12 12 1 2 1
 6 12 12 2 1 1
 6 12 12 3 1 1
 6 12 12 4 1 1
 6 12 13 1 1 1
 6 12 13 2 1 1
 6 12 13 3 2 1
 6 12 13 4 1 1
 6 12 14 1 1 1
 6 12 14 2 1 1
 6 12 14 3 1 1
 6 12 14 4 2 1
 6 12 15 1 1 1
 6 12 15 2 1 1
 6 12 15 3 1 1
 6 12 15 4 1 1
 6 12 16 1 1 1
 6 12 16 2 1 1
 6 12 16 3 1 1
 6 12 16 4 2 1
 6 12 17 1 1 1
 6 12 17 2 1 1
 6 12 17 3 1 1
 6 12 17 4 1 1
 6 12 18 1 1 1
 6 12 18 2 2 1
 6 12 18 3 1 1
 6 12 18 4 1 1
 6 12 19 1 1 1
 6 12 19 2 2 1
 6 12 19 3 1 1
 6 12 19 4 1 1
 6 12 20 1 2 1
 6 12 20 2 1 1
 6 12 20 3 1 1
 6 12 20 4 1 1
 6 12 21 1 2 1
 6 12 21 2 1 1
 6 12 21 3 1 1
 6 12 21 4 1 1
 6 12 22 1 1 1
 6 12 22 2 1 1
 6 12 22 3 1 1
 6 12 22 4 1 1
 6 12 23 1 2 1
 6 12 23 2 1 1
 6 12 23 3 1 1
 6 12 23 4 2 1
 6 12 24 1 1 1
 6 12 24 2 1 1
 6 12 24 3 1 1
 6 12 24 4 2 1
 6 12 25 1 1 1
 6 12 25 2 1 1
 6 12 25 3 1 1
 6 12 25 4 2 1
 6 12 26 1 1 1
 6 12 26 2 1 1
 6 12 26 3 2 1
 6 12 26 4 2 1
 6 12 27 1 2 1
 6 12 27 2 1 1
 6 12 27 3 2 1
 6 12 27 4 2 1
 6 12 28 1 1 1
 6 12 28 2 2 1
 6 12 28 3 1 1
 6 12 28 4 1 1
 6 12 29 1 2 1
 6 12 29 2 2 1
 6 12 29 3 1 1
 6 12 29 4 2 1
 6 12 30 1 1 1
 6 12 30 2 2 1
 6 12 30 3 1 1
 6 12 30 4 1 1
 6 12 31 1 2 1
 6 12 31 2 1 1
 6 12 31 3 1 1
 6 12 31 4 1 1
 6 12 32 1 2 1
 6 12 32 2 1 1
 6 12 32 3 1 1
 6 12 32 4 1 1
 6 13 1 1 1 1
 6 13 1 2 1 1
 6 13 1 3 1 1
 6 13 1 4 2 1
 6 13 2 1 2 1
 6 13 2 2 2 1
 6 13 2 3 1 1
 6 13 2 4 1 1
 6 13 3 1 1 1
 6 13 3 2 2 1
 6 13 3 3 2 1
 6 13 3 4 1 1
 6 13 4 1 2 1
 6 13 4 2 2 1
 6 13 4 3 1 1
 6 13 4 4 1 1
 6 13 5 1 1 1
 6 13 5 2 1 1
 6 13 5 3 1 1
 6 13 5 4 2 1
 6 13 6 1 1 1
 6 13 6 2 2 1
 6 13 6 3 2 1
 6 13 6 4 1 1
 6 13 7 1 1 1
 6 13 7 2 1 1
 6 13 7 3 1 1
 6 13 7 4 1 1
 6 13 8 1 2 1
 6 13 8 2 1 1
 6 13 8 3 2 1
 6 13 8 4 2 1
 6 13 9 1 1 1
 6 13 9 2 1 1
 6 13 9 3 1 1
 6 13 9 4 1 1
 6 13 10 1 1 1
 6 13 10 2 1 1
 6 13 10 3 1 1
 6 13 10 4 1 1
 6 13 11 1 1 1
 6 13 11 2 1 1
 6 13 11 3 1 1
 6 13 11 4 2 1
 6 13 12 1 1 1
 6 13 12 2 1 1
 6 13 12 3 2 1
 6 13 12 4 2 1
 6 13 13 1 2 1
 6 13 13 2 2 1
 6 13 13 3 2 1
 6 13 13 4 1 1
 6 13 14 1 1 1
 6 13 14 2 1 1
 6 13 14 3 2 1
 6 13 14 4 1 1
 6 13 15 1 1 1
 6 13 15 2 1 1
 6 13 15 3 2 1
 6 13 15 4 1 1
 6 13 16 1 2 1
 6 13 16 2 1 1
 6 13 16 3 1 1
 6 13 16 4 1 1
 6 13 17 1 1 1
 6 13 17 2 1 1
 6 13 17 3 1 1
 6 13 17 4 1 1
 6 13 18 1 2 1
 6 13 18 2 1 1
 6 13 18 3 2 1
 6 13 18 4 2 1
 6 13 19 1 1 1
 6 13 19 2 1 1
 6 13 19 3 1 1
 6 13 19 4 2 1
 6 13 20 1 1 1
 6 13 20 2 1 1
 6 13 20 3 2 1
 6 13 20 4 2 1
 6 13 21 1 1 1
 6 13 21 2 2 1
 6 13 21 3 1 1
 6 13 21 4 1 1
 6 13 22 1 2 1
 6 13 22 2 2 1
 6 13 22 3 1 1
 6 13 22 4 1 1
 6 13 23 1 1 1
 6 13 23 2 1 1
 6 13 23 3 1 1
 6 13 23 4 1 1
 6 13 24 1 2 1
 6 13 24 2 1 1
 6 13 24 3 2 1
 6 13 24 4 2 1
 6 13 25 1 2 1
 6 13 25 2 1 1
 6 13 25 3 1 1
 6 13 25 4 2 1
 6 13 26 1 1 1
 6 13 26 2 1 1
 6 13 26 3 1 1
 6 13 26 4 1 1
 6 13 27 1 1 1
 6 13 27 2 1 1
 6 13 27 3 2 1
 6 13 27 4 1 1
 6 13 28 1 1 1
 6 13 28 2 1 1
 6 13 28 3 2 1
 6 13 28 4 1 1
 6 13 29 1 1 1
 6 13 29 2 2 1
 6 13 29 3 1 1
 6 13 29 4 1 1
 6 13 30 1 1 1
 6 13 30 2 2 1
 6 13 30 3 1 1
 6 13 30 4 1 1
 6 13 31 1 2 1
 6 13 31 2 1 1
 6 13 31 3 2 1
 6 13 31 4 2 1
 6 13 32 1 2 1
 6 13 32 2 1 1
 6 13 32 3 2 1
 6 13 32 4 1 1
 6 14 1 1 1 1
 6 14 1 2 1 1
 6 14 1 3 1 1
 6 14 1 4 1 1
 6 14 2 1 1 1
 6 14 2 2 1 1
 6 14 2 3 1 1
 6 14 2 4 1 1
 6 14 3 1 1 1
 6 14 3 2 1 1
 6 14 3 3 2 1
 6 14 3 4 2 1
 6 14 4 1 1 1
 6 14 4 2 2 1
 6 14 4 3 1 1
 6 14 4 4 1 1
 6 14 5 1 1 1
 6 14 5 2 1 1
 6 14 5 3 2 1
 6 14 5 4 2 1
 6 14 6 1 1 1
 6 14 6 2 2 1
 6 14 6 3 1 1
 6 14 6 4 2 1
 6 14 7 1 1 1
 6 14 7 2 1 1
 6 14 7 3 1 1
 6 14 7 4 2 1
 6 14 8 1 2 1
 6 14 8 2 2 1
 6 14 8 3 1 1
 6 14 8 4 2 1
 6 14 9 1 1 1
 6 14 9 2 1 1
 6 14 9 3 1 1
 6 14 9 4 2 1
 6 14 10 1 1 1
 6 14 10 2 1 1
 6 14 10 3 1 1
 6 14 10 4 2 1
 6 14 11 1 1 1
 6 14 11 2 1 1
 6 14 11 3 1 1
 6 14 11 4 1 1
 6 14 12 1 1 1
 6 14 12 2 2 1
 6 14 12 3 2 1
 6 14 12 4 2 1
 6 14 13 1 2 1
 6 14 13 2 2 1
 6 14 13 3 2 1
 6 14 13 4 1 1
 6 14 14 1 1 1
 6 14 14 2 1 1
 6 14 14 3 2 1
 6 14 14 4 2 1
 6 14 15 1 1 1
 6 14 15 2 1 1
 6 14 15 3 1 1
 6 14 15 4 1 1
 6 14 16 1 2 1
 6 14 16 2 1 1
 6 14 16 3 1 1
 6 14 16 4 1 1
 6 14 17 1 1 1
 6 14 17 2 2 1
 6 14 17 3 1 1
 6 14 17 4 1 1
 6 14 18 1 1 1
 6 14 18 2 1 1
 6 14 18 3 1 1
 6 14 18 4 2 1
 6 14 19 1 1 1
 6 14 19 2 2 1
 6 14 19 3 1 1
 6 14 19 4 1 1
 6 14 20 1 2 1
 6 14 20 2 2 1
 6 14 20 3 1 1
 6 14 20 4 1 1
 6 14 21 1 1 1
 6 14 21 2 1 1
 6 14 21 3 2 1
 6 14 21 4 2 1
 6 14 22 1 1 1
 6 14 22 2 1 1
 6 14 22 3 1 1
 6 14 22 4 1 1
 6 14 23 1 1 1
 6 14 23 2 1 1
 6 14 23 3 2 1
 6 14 23 4 1 1
 6 14 24 1 2 1
 6 14 24 2 2 1
 6 14 24 3 1 1
 6 14 24 4 1 1
 6 14 25 1 2 1
 6 14 25 2 1 1
 6 14 25 3 2 1
 6 14 25 4 1 1
 6 14 26 1 1 1
 6 14 26 2 1 1
 6 14 26 3 2 1
 6 14 26 4 1 1
 6 14 27 1 1 1
 6 14 27 2 1 1
 6 14 27 3 1 1
 6 14 27 4 2 1
 6 14 28 1 1 1
 6 14 28 2 2 1
 6 14 28 3 2 1
 6 14 28 4 2 1
 6 14 29 1 1 1
 6 14 29 2 2 1
 6 14 29 3 2 1
 6 14 29 4 2 1
 6 14 30 1 1 1
 6 14 30 2 2 1
 6 14 30 3 2 1
 6 14 30 4 2 1
 6 14 31 1 2 1
 6 14 31 2 1 1
 6 14 31 3 1 1
 6 14 31 4 2 1
 6 14 32 1 2 1
 6 14 32 2 1 1
 6 14 32 3 1 1
 6 14 32 4 1 1
 6 15 1 1 1 1
 6 15 1 2 2 1
 6 15 1 3 1 1
 6 15 1 4 1 1
 6 15 2 1 1 1
 6 15 2 2 1 1
 6 15 2 3 1 1
 6 15 2 4 2 1
 6 15 3 1 2 1
 6 15 3 2 1 1
 6 15 3 3 1 1
 6 15 3 4 1 1
 6 15 4 1 1 1
 6 15 4 2 2 1
 6 15 4 3 1 1
 6 15 4 4 1 1
 6 15 5 1 1 1
 6 15 5 2 1 1
 6 15 5 3 1 1
 6 15 5 4 1 1
 6 15 6 1 1 1
 6 15 6 2 1 1
 6 15 6 3 1 1
 6 15 6 4 1 1
 6 15 7 1 2 1
 6 15 7 2 2 1
 6 15 7 3 1 1
 6 15 7 4 1 1
 6 15 8 1 1 1
 6 15 8 2 1 1
 6 15 8 3 1 1
 6 15 8 4 1 1
 6 15 9 1 2 1
 6 15 9 2 1 1
 6 15 9 3 1 1
 6 15 9 4 1 1
 6 15 10 1 1 1
 6 15 10 2 1 1
 6 15 10 3 1 1
 6 15 10 4 2 1
 6 15 11 1 1 1
 6 15 11 2 1 1
 6 15 11 3 1 1
 6 15 11 4 1 1
 6 15 12 1 2 1
 6 15 12 2 1 1
 6 15 12 3 2 1
 6 15 12 4 1 1
 6 15 13 1 2 1
 6 15 13 2 1 1
 6 15 13 3 1 1
 6 15 13 4 2 1
 6 15 14 1 2 1
 6 15 14 2 1 1
 6 15 14 3 2 1
 6 15 14 4 2 1
 6 15 15 1 1 1
 6 15 15 2 1 1
 6 15 15 3 2 1
 6 15 15 4 2 1
 6 15 16 1 2 1
 6 15 16 2 1 1
 6 15 16 3 1 1
 6 15 16 4 2 1
 6 15 17 1 2 1
 6 15 17 2 1 1
 6 15 17 3 1 1
 6 15 17 4 2 1
 6 15 18 1 2 1
 6 15 18 2 2 1
 6 15 18 3 1 1
 6 15 18 4 2 1
 6 15 19 1 1 1
 6 15 19 2 1 1
 6 15 19 3 2 1
 6 15 19 4 1 1
 6 15 20 1 2 1
 6 15 20 2 2 1
 6 15 20 3 1 1
 6 15 20 4 1 1
 6 15 21 1 1 1
 6 15 21 2 1 1
 6 15 21 3 1 1
 6 15 21 4 1 1
 6 15 22 1 1 1
 6 15 22 2 1 1
 6 15 22 3 1 1
 6 15 22 4 2 1
 6 15 23 1 1 1
 6 15 23 2 2 1
 6 15 23 3 2 1
 6 15 23 4 2 1
 6 15 24 1 2 1
 6 15 24 2 1 1
 6 15 24 3 2 1
 6 15 24 4 1 1
 6 15 25 1 1 1
 6 15 25 2 1 1
 6 15 25 3 1 1
 6 15 25 4 2 1
 6 15 26 1 1 1
 6 15 26 2 1 1
 6 15 26 3 1 1
 6 15 26 4 2 1
 6 15 27 1 1 1
 6 15 27 2 1 1
 6 15 27 3 1 1
 6 15 27 4 1 1
 6 15 28 1 1 1
 6 15 28 2 2 1
 6 15 28 3 1 1
 6 15 28 4 1 1
 6 15 29 1 1 1
 6 15 29 2 2 1
 6 15 29 3 1 1
 6 15 29 4 2 1
 6 15 30 1 2 1
 6 15 30 2 1 1
 6 15 30 3 1 1
 6 15 30 4 1 1
 6 15 31 1 1 1
 6 15 31 2 1 1
 6 15 31 3 1 1
 6 15 31 4 2 1
 6 15 32 1 1 1
 6 15 32 2 1 1
 6 15 32 3 1 1
 6 15 32 4 1 1
 6 16 1 1 1 1
 6 16 1 2 1 1
 6 16 1 3 2 1
 6 16 1 4 1 1
 6 16 2 1 1 1
 6 16 2 2 2 1
 6 16 2 3 2 1
 6 16 2 4 1 1
 6 16 3 1 2 1
 6 16 3 2 1 1
 6 16 3 3 1 1
 6 16 3 4 2 1
 6 16 4 1 2 1
 6 16 4 2 1 1
 6 16 4 3 2 1
 6 16 4 4 1 1
 6 16 5 1 2 1
 6 16 5 2 1 1
 6 16 5 3 1 1
 6 16 5 4 1 1
 6 16 6 1 1 1
 6 16 6 2 2 1
 6 16 6 3 1 1
 6 16 6 4 2 1
 6 16 7 1 1 1
 6 16 7 2 1 1
 6 16 7 3 1 1
 6 16 7 4 2 1
 6 16 8 1 1 1
 6 16 8 2 2 1
 6 16 8 3 1 1
 6 16 8 4 2 1
 6 16 9 1 1 1
 6 16 9 2 1 1
 6 16 9 3 1 1
 6 16 9 4 2 1
 6 16 10 1 1 1
 6 16 10 2 2 1
 6 16 10 3 1 1
 6 16 10 4 1 1
 6 16 11 1 1 1
 6 16 11 2 1 1
 6 16 11 3 1 1
 6 16 11 4 2 1
 6 16 12 1 1 1
 6 16 12 2 2 1
 6 16 12 3 1 1
 6 16 12 4 1 1
 6 16 13 1 1 1
 6 16 13 2 1 1
 6 16 13 3 1 1
 6 16 13 4 2 1
 6 16 14 1 1 1
 6 16 14 2 1 1
 6 16 14 3 1 1
 6 16 14 4 1 1
 6 16 15 1 2 1
 6 16 15 2 2 1
 6 16 15 3 1 1
 6 16 15 4 2 1
 6 16 16 1 2 1
 6 16 16 2 1 1
 6 16 16 3 2 1
 6 16 16 4 2 1
 6 16 17 1 1 1
 6 16 17 2 1 1
 6 16 17 3 1 1
 6 16 17 4 1 1
 6 16 18 1 1 1
 6 16 18 2 2 1
 6 16 18 3 1 1
 6 16 18 4 1 1
 6 16 19 1 1 1
 6 16 19 2 1 1
 6 16 19 3 2 1
 6 16 19 4 2 1
 6 16 20 1 1 1
 6 16 20 2 2 1
 6 16 20 3 2 1
 6 16 20 4 2 1
 6 16 21 1 1 1
 6 16 21 2 1 1
 6 16 21 3 1 1
 6 16 21 4 1 1
 6 16 22 1 2 1
 6 16 22 2 2 1
 6 16 22 3 1 1
 6 16 22 4 1 1
 6 16 23 1 1 1
 6 16 23 2 1 1
 6 16 23 3 1 1
 6 16 23 4 1 1
 6 16 24 1 1 1
 6 16 24 2 1 1
 6 16 24 3 2 1
 6 16 24 4 2 1
 6 16 25 1 1 1
 6 16 25 2 1 1
 6 16 25 3 1 1
 6 16 25 4 1 1
 6 16 26 1 1 1
 6 16 26 2 1 1
 6 16 26 3 2 1
 6 16 26 4 1 1
 6 16 27 1 1 1
 6 16 27 2 1 1
 6 16 27 3 1 1
 6 16 27 4 1 1
 6 16 28 1 1 1
 6 16 28 2 1 1
 6 16 28 3 2 1
 6 16 28 4 2 1
 6 16 29 1 1 1
 6 16 29 2 1 1
 6 16 29 3 1 1
 6 16 29 4 1 1
 6 16 30 1 1 1
 6 16 30 2 1 1
 6 16 30 3 1 1
 6 16 30 4 1 1
 6 16 31 1 1 1
 6 16 31 2 1 1
 6 16 31 3 2 1
 6 16 31 4 1 1
 6 16 32 1 1 1
 6 16 32 2 1 1
 6 16 32 3 1 1
 6 16 32 4 1 1
 6 17 1 1 1 1
 6 17 1 2 1 1
 6 17 1 3 1 1
 6 17 1 4 2 1
 6 17 2 1 2 1
 6 17 2 2 1 1
 6 17 2 3 2 1
 6 17 2 4 1 1
 6 17 3 1 2 1
 6 17 3 2 1 1
 6 17 3 3 1 1
 6 17 3 4 2 1
 6 17 4 1 1 1
 6 17 4 2 1 1
 6 17 4 3 1 1
 6 17 4 4 1 1
 6 17 5 1 1 1
 6 17 5 2 2 1
 6 17 5 3 2 1
 6 17 5 4 1 1
 6 17 6 1 1 1
 6 17 6 2 1 1
 6 17 6 3 2 1
 6 17 6 4 1 1
 6 17 7 1 2 1
 6 17 7 2 1 1
 6 17 7 3 2 1
 6 17 7 4 1 1
 6 17 8 1 2 1
 6 17 8 2 1 1
 6 17 8 3 1 1
 6 17 8 4 1 1
 6 17 9 1 1 1
 6 17 9 2 1 1
 6 17 9 3 1 1
 6 17 9 4 2 1
 6 17 10 1 1 1
 6 17 10 2 2 1
 6 17 10 3 2 1
 6 17 10 4 1 1
 6 17 11 1 2 1
 6 17 11 2 2 1
 6 17 11 3 1 1
 6 17 11 4 1 1
 6 17 12 1 2 1
 6 17 12 2 1 1
 6 17 12 3 1 1
 6 17 12 4 1 1
 6 17 13 1 2 1
 6 17 13 2 2 1
 6 17 13 3 2 1
 6 17 13 4 1 1
 6 17 14 1 1 1
 6 17 14 2 1 1
 6 17 14 3 2 1
 6 17 14 4 1 1
 6 17 15 1 1 1
 6 17 15 2 1 1
 6 17 15 3 1 1
 6 17 15 4 2 1
 6 17 16 1 1 1
 6 17 16 2 2 1
 6 17 16 3 1 1
 6 17 16 4 2 1
 6 17 17 1 1 1
 6 17 17 2 1 1
 6 17 17 3 2 1
 6 17 17 4 1 1
 6 17 18 1 1 1
 6 17 18 2 2 1
 6 17 18 3 1 1
 6 17 18 4 1 1
 6 17 19 1 2 1
 6 17 19 2 1 1
 6 17 19 3 2 1
 6 17 19 4 1 1
 6 17 20 1 1 1
 6 17 20 2 1 1
 6 17 20 3 1 1
 6 17 20 4 1 1
 6 17 21 1 1 1
 6 17 21 2 2 1
 6 17 21 3 2 1
 6 17 21 4 2 1
 6 17 22 1 1 1
 6 17 22 2 1 1
 6 17 22 3 1 1
 6 17 22 4 2 1
 6 17 23 1 1 1
 6 17 23 2 1 1
 6 17 23 3 1 1
 6 17 23 4 2 1
 6 17 24 1 1 1
 6 17 24 2 1 1
 6 17 24 3 1 1
 6 17 24 4 1 1
 6 17 25 1 1 1
 6 17 25 2 2 1
 6 17 25 3 1 1
 6 17 25 4 1 1
 6 17 26 1 2 1
 6 17 26 2 1 1
 6 17 26 3 1 1
 6 17 26 4 1 1
 6 17 27 1 1 1
 6 17 27 2 1 1
 6 17 27 3 1 1
 6 17 27 4 1 1
 6 17 28 1 1 1
 6 17 28 2 1 1
 6 17 28 3 1 1
 6 17 28 4 1 1
 6 17 29 1 2 1
 6 17 29 2 2 1
 6 17 29 3 1 1
 6 17 29 4 1 1
 6 17 30 1 2 1
 6 17 30 2 2 1
 6 17 30 3 1 1
 6 17 30 4 1 1
 6 17 31 1 1 1
 6 17 31 2 1 1
 6 17 31 3 1 1
 6 17 31 4 1 1
 6 17 32 1 1 1
 6 17 32 2 1 1
 6 17 32 3 1 1
 6 17 32 4 2 1
 6 18 1 1 2 1
 6 18 1 2 1 1
 6 18 1 3 1 1
 6 18 1 4 2 1
 6 18 2 1 1 1
 6 18 2 2 2 1
 6 18 2 3 1 1
 6 18 2 4 1 1
 6 18 3 1 1 1
 6 18 3 2 2 1
 6 18 3 3 1 1
 6 18 3 4 2 1
 6 18 4 1 2 1
 6 18 4 2 1 1
 6 18 4 3 2 1
 6 18 4 4 1 1
 6 18 5 1 2 1
 6 18 5 2 2 1
 6 18 5 3 1 1
 6 18 5 4 1 1
 6 18 6 1 1 1
 6 18 6 2 1 1
 6 18 6 3 2 1
 6 18 6 4 2 1
 6 18 7 1 1 1
 6 18 7 2 1 1
 6 18 7 3 2 1
 6 18 7 4 2 1
 6 18 8 1 1 1
 6 18 8 2 1 1
 6 18 8 3 1 1
 6 18 8 4 1 1
 6 18 9 1 1 1
 6 18 9 2 2 1
 6 18 9 3 1 1
 6 18 9 4 1 1
 6 18 10 1 2 1
 6 18 10 2 1 1
 6 18 10 3 1 1
 6 18 10 4 1 1
 6 18 11 1 1 1
 6 18 11 2 1 1
 6 18 11 3 2 1
 6 18 11 4 1 1
 6 18 12 1 1 1
 6 18 12 2 2 1
 6 18 12 3 1 1
 6 18 12 4 1 1
 6 18 13 1 1 1
 6 18 13 2 2 1
 6 18 13 3 2 1
 6 18 13 4 2 1
 6 18 14 1 1 1
 6 18 14 2 2 1
 6 18 14 3 2 1
 6 18 14 4 2 1
 6 18 15 1 1 1
 6 18 15 2 1 1
 6 18 15 3 1 1
 6 18 15 4 1 1
 6 18 16 1 1 1
 6 18 16 2 2 1
 6 18 16 3 2 1
 6 18 16 4 2 1
 6 18 17 1 1 1
 6 18 17 2 1 1
 6 18 17 3 1 1
 6 18 17 4 1 1
 6 18 18 1 1 1
 6 18 18 2 2 1
 6 18 18 3 1 1
 6 18 18 4 1 1
 6 18 19 1 2 1
 6 18 19 2 1 1
 6 18 19 3 1 1
 6 18 19 4 2 1
 6 18 20 1 1 1
 6 18 20 2 1 1
 6 18 20 3 1 1
 6 18 20 4 2 1
 6 18 21 1 1 1
 6 18 21 2 1 1
 6 18 21 3 1 1
 6 18 21 4 1 1
 6 18 22 1 1 1
 6 18 22 2 1 1
 6 18 22 3 1 1
 6 18 22 4 1 1
 6 18 23 1 1 1
 6 18 23 2 2 1
 6 18 23 3 1 1
 6 18 23 4 2 1
 6 18 24 1 1 1
 6 18 24 2 1 1
 6 18 24 3 1 1
 6 18 24 4 1 1
 6 18 25 1 2 1
 6 18 25 2 2 1
 6 18 25 3 1 1
 6 18 25 4 1 1
 6 18 26 1 1 1
 6 18 26 2 2 1
 6 18 26 3 1 1
 6 18 26 4 1 1
 6 18 27 1 1 1
 6 18 27 2 1 1
 6 18 27 3 2 1
 6 18 27 4 2 1
 6 18 28 1 1 1
 6 18 28 2 1 1
 6 18 28 3 1 1
 6 18 28 4 1 1
 6 18 29 1 1 1
 6 18 29 2 2 1
 6 18 29 3 1 1
 6 18 29 4 1 1
 6 18 30 1 2 1
 6 18 30 2 1 1
 6 18 30 3 2 1
 6 18 30 4 2 1
 6 18 31 1 1 1
 6 18 31 2 1 1
 6 18 31 3 1 1
 6 18 31 4 1 1
 6 18 32 1 1 1
 6 18 32 2 2 1
 6 18 32 3 1 1
 6 18 32 4 1 1
 6 19 1 1 1 1
 6 19 1 2 1 1
 6 19 1 3 1 1
 6 19 1 4 2 1
 6 19 2 1 2 1
 6 19 2 2 1 1
 6 19 2 3 1 1
 6 19 2 4 1 1
 6 19 3 1 1 1
 6 19 3 2 1 1
 6 19 3 3 1 1
 6 19 3 4 1 1
 6 19 4 1 1 1
 6 19 4 2 2 1
 6 19 4 3 1 1
 6 19 4 4 2 1
 6 19 5 1 1 1
 6 19 5 2 1 1
 6 19 5 3 1 1
 6 19 5 4 2 1
 6 19 6 1 1 1
 6 19 6 2 2 1
 6 19 6 3 1 1
 6 19 6 4 2 1
 6 19 7 1 1 1
 6 19 7 2 1 1
 6 19 7 3 1 1
 6 19 7 4 1 1
 6 19 8 1 2 1
 6 19 8 2 1 1
 6 19 8 3 1 1
 6 19 8 4 1 1
 6 19 9 1 2 1
 6 19 9 2 1 1
 6 19 9 3 2 1
 6 19 9 4 1 1
 6 19 10 1 1 1
 6 19 10 2 2 1
 6 19 10 3 1 1
 6 19 10 4 1 1
 6 19 11 1 2 1
 6 19 11 2 1 1
 6 19 11 3 1 1
 6 19 11 4 1 1
 6 19 12 1 2 1
 6 19 12 2 1 1
 6 19 12 3 2 1
 6 19 12 4 2 1
 6 19 13 1 1 1
 6 19 13 2 2 1
 6 19 13 3 1 1
 6 19 13 4 1 1
 6 19 14 1 2 1
 6 19 14 2 1 1
 6 19 14 3 1 1
 6 19 14 4 1 1
 6 19 15 1 1 1
 6 19 15 2 1 1
 6 19 15 3 1 1
 6 19 15 4 1 1
 6 19 16 1 1 1
 6 19 16 2 2 1
 6 19 16 3 1 1
 6 19 16 4 1 1
 6 19 17 1 2 1
 6 19 17 2 1 1
 6 19 17 3 2 1
 6 19 17 4 2 1
 6 19 18 1 2 1
 6 19 18 2 2 1
 6 19 18 3 1 1
 6 19 18 4 1 1
 6 19 19 1 1 1
 6 19 19 2 1 1
 6 19 19 3 1 1
 6 19 19 4 2 1
 6 19 20 1 1 1
 6 19 20 2 2 1
 6 19 20 3 2 1
 6 19 20 4 1 1
 6 19 21 1 1 1
 6 19 21 2 1 1
 6 19 21 3 2 1
 6 19 21 4 1 1
 6 19 22 1 1 1
 6 19 22 2 1 1
 6 19 22 3 2 1
 6 19 22 4 1 1
 6 19 23 1 2 1
 6 19 23 2 1 1
 6 19 23 3 1 1
 6 19 23 4 2 1
 6 19 24 1 1 1
 6 19 24 2 1 1
 6 19 24 3 1 1
 6 19 24 4 1 1
 6 19 25 1 1 1
 6 19 25 2 1 1
 6 19 25 3 1 1
 6 19 25 4 2 1
 6 19 26 1 1 1
 6 19 26 2 1 1
 6 19 26 3 1 1
 6 19 26 4 1 1
 6 19 27 1 2 1
 6 19 27 2 1 1
 6 19 27 3 1 1
 6 19 27 4 1 1
 6 19 28 1 1 1
 6 19 28 2 1 1
 6 19 28 3 1 1
 6 19 28 4 1 1
 6 19 29 1 1 1
 6 19 29 2 1 1
 6 19 29 3 2 1
 6 19 29 4 1 1
 6 19 30 1 2 1
 6 19 30 2 1 1
 6 19 30 3 1 1
 6 19 30 4 1 1
 6 19 31 1 1 1
 6 19 31 2 1 1
 6 19 31 3 1 1
 6 19 31 4 2 1
 6 19 32 1 2 1
 6 19 32 2 2 1
 6 19 32 3 1 1
 6 19 32 4 2 1
 6 20 1 1 2 1
 6 20 1 2 1 1
 6 20 1 3 1 1
 6 20 1 4 1 1
 6 20 2 1 1 1
 6 20 2 2 1 1
 6 20 2 3 2 1
 6 20 2 4 2 1
 6 20 3 1 1 1
 6 20 3 2 2 1
 6 20 3 3 2 1
 6 20 3 4 1 1
 6 20 4 1 1 1
 6 20 4 2 1 1
 6 20 4 3 2 1
 6 20 4 4 1 1
 6 20 5 1 1 1
 6 20 5 2 2 1
 6 20 5 3 1 1
 6 20 5 4 2 1
 6 20 6 1 2 1
 6 20 6 2 1 1
 6 20 6 3 1 1
 6 20 6 4 2 1
 6 20 7 1 1 1
 6 20 7 2 1 1
 6 20 7 3 2 1
 6 20 7 4 2 1
 6 20 8 1 1 1
 6 20 8 2 1 1
 6 20 8 3 1 1
 6 20 8 4 1 1
 6 20 9 1 2 1
 6 20 9 2 2 1
 6 20 9 3 1 1
 6 20 9 4 1 1
 6 20 10 1 1 1
 6 20 10 2 1 1
 6 20 10 3 2 1
 6 20 10 4 2 1
 6 20 11 1 1 1
 6 20 11 2 1 1
 6 20 11 3 1 1
 6 20 11 4 2 1
 6 20 12 1 1 1
 6 20 12 2 1 1
 6 20 12 3 2 1
 6 20 12 4 1 1
 6 20 13 1 2 1
 6 20 13 2 1 1
 6 20 13 3 1 1
 6 20 13 4 2 1
 6 20 14 1 2 1
 6 20 14 2 1 1
 6 20 14 3 2 1
 6 20 14 4 1 1
 6 20 15 1 2 1
 6 20 15 2 1 1
 6 20 15 3 1 1
 6 20 15 4 2 1
 6 20 16 1 1 1
 6 20 16 2 1 1
 6 20 16 3 2 1
 6 20 16 4 2 1
 6 20 17 1 1 1
 6 20 17 2 2 1
 6 20 17 3 1 1
 6 20 17 4 1 1
 6 20 18 1 1 1
 6 20 18 2 2 1
 6 20 18 3 1 1
 6 20 18 4 2 1
 6 20 19 1 1 1
 6 20 19 2 1 1
 6 20 19 3 2 1
 6 20 19 4 1 1
 6 20 20 1 1 1
 6 20 20 2 2 1
 6 20 20 3 1 1
 6 20 20 4 1 1
 6 20 21 1 2 1
 6 20 21 2 2 1
 6 20 21 3 1 1
 6 20 21 4 1 1
 6 20 22 1 1 1
 6 20 22 2 1 1
 6 20 22 3 1 1
 6 20 22 4 1 1
 6 20 23 1 2 1
 6 20 23 2 1 1
 6 20 23 3 2 1
 6 20 23 4 1 1
 6 20 24 1 2 1
 6 20 24 2 2 1
 6 20 24 3 1 1
 6 20 24 4 1 1
 6 20 25 1 2 1
 6 20 25 2 1 1
 6 20 25 3 2 1
 6 20 25 4 1 1
 6 20 26 1 1 1
 6 20 26 2 2 1
 6 20 26 3 2 1
 6 20 26 4 1 1
 6 20 27 1 1 1
 6 20 27 2 1 1
 6 20 27 3 1 1
 6 20 27 4 1 1
 6 20 28 1 1 1
 6 20 28 2 1 1
 6 20 28 3 1 1
 6 20 28 4 1 1
 6 20 29 1 1 1
 6 20 29 2 2 1
 6 20 29 3 1 1
 6 20 29 4 1 1
 6 20 30 1 1 1
 6 20 30 2 1 1
 6 20 30 3 2 1
 6 20 30 4 1 1
 6 20 31 1 2 1
 6 20 31 2 1 1
 6 20 31 3 2 1
 6 20 31 4 2 1
 6 20 32 1 2 1
 6 20 32 2 1 1
 6 20 32 3 1 1
 6 20 32 4 2 1
 6 21 1 1 1 1
 6 21 1 2 1 1
 6 21 1 3 1 1
 6 21 1 4 1 1
 6 21 2 1 1 1
 6 21 2 2 2 1
 6 21 2 3 1 1
 6 21 2 4 1 1
 6 21 3 1 1 1
 6 21 3 2 1 1
 6 21 3 3 1 1
 6 21 3 4 2 1
 6 21 4 1 2 1
 6 21 4 2 1 1
 6 21 4 3 1 1
 6 21 4 4 1 1
 6 21 5 1 1 1
 6 21 5 2 1 1
 6 21 5 3 1 1
 6 21 5 4 1 1
 6 21 6 1 2 1
 6 21 6 2 1 1
 6 21 6 3 1 1
 6 21 6 4 2 1
 6 21 7 1 1 1
 6 21 7 2 2 1
 6 21 7 3 2 1
 6 21 7 4 1 1
 6 21 8 1 2 1
 6 21 8 2 2 1
 6 21 8 3 2 1
 6 21 8 4 1 1
 6 21 9 1 2 1
 6 21 9 2 1 1
 6 21 9 3 1 1
 6 21 9 4 1 1
 6 21 10 1 2 1
 6 21 10 2 2 1
 6 21 10 3 1 1
 6 21 10 4 1 1
 6 21 11 1 1 1
 6 21 11 2 2 1
 6 21 11 3 1 1
 6 21 11 4 1 1
 6 21 12 1 1 1
 6 21 12 2 1 1
 6 21 12 3 2 1
 6 21 12 4 1 1
 6 21 13 1 1 1
 6 21 13 2 2 1
 6 21 13 3 1 1
 6 21 13 4 1 1
 6 21 14 1 2 1
 6 21 14 2 1 1
 6 21 14 3 1 1
 6 21 14 4 2 1
 6 21 15 1 1 1
 6 21 15 2 2 1
 6 21 15 3 2 1
 6 21 15 4 1 1
 6 21 16 1 1 1
 6 21 16 2 1 1
 6 21 16 3 1 1
 6 21 16 4 1 1
 6 21 17 1 1 1
 6 21 17 2 2 1
 6 21 17 3 1 1
 6 21 17 4 1 1
 6 21 18 1 1 1
 6 21 18 2 1 1
 6 21 18 3 1 1
 6 21 18 4 2 1
 6 21 19 1 1 1
 6 21 19 2 2 1
 6 21 19 3 1 1
 6 21 19 4 1 1
 6 21 20 1 1 1
 6 21 20 2 1 1
 6 21 20 3 1 1
 6 21 20 4 1 1
 6 21 21 1 1 1
 6 21 21 2 1 1
 6 21 21 3 2 1
 6 21 21 4 1 1
 6 21 22 1 1 1
 6 21 22 2 2 1
 6 21 22 3 1 1
 6 21 22 4 2 1
 6 21 23 1 2 1
 6 21 23 2 1 1
 6 21 23 3 2 1
 6 21 23 4 1 1
 6 21 24 1 2 1
 6 21 24 2 2 1
 6 21 24 3 1 1
 6 21 24 4 2 1
 6 21 25 1 1 1
 6 21 25 2 1 1
 6 21 25 3 1 1
 6 21 25 4 1 1
 6 21 26 1 2 1
 6 21 26 2 1 1
 6 21 26 3 1 1
 6 21 26 4 1 1
 6 21 27 1 1 1
 6 21 27 2 1 1
 6 21 27 3 1 1
 6 21 27 4 2 1
 6 21 28 1 2 1
 6 21 28 2 1 1
 6 21 28 3 1 1
 6 21 28 4 1 1
 6 21 29 1 1 1
 6 21 29 2 2 1
 6 21 29 3 1 1
 6 21 29 4 1 1
 6 21 30 1 1 1
 6 21 30 2 1 1
 6 21 30 3 1 1
 6 21 30 4 1 1
 6 21 31 1 1 1
 6 21 31 2 1 1
 6 21 31 3 1 1
 6 21 31 4 1 1
 6 21 32 1 1 1
 6 21 32 2 1 1
 6 21 32 3 1 1
 6 21 32 4 2 1
 6 22 1 1 1 1
 6 22 1 2 1 1
 6 22 1 3 2 1
 6 22 1 4 1 1
 6 22 2 1 1 1
 6 22 2 2 1 1
 6 22 2 3 2 1
 6 22 2 4 2 1
 6 22 3 1 1 1
 6 22 3 2 2 1
 6 22 3 3 1 1
 6 22 3 4 1 1
 6 22 4 1 2 1
 6 22 4 2 1 1
 6 22 4 3 1 1
 6 22 4 4 2 1
 6 22 5 1 2 1
 6 22 5 2 1 1
 6 22 5 3 1 1
 6 22 5 4 1 1
 6 22 6 1 2 1
 6 22 6 2 1 1
 6 22 6 3 2 1
 6 22 6 4 1 1
 6 22 7 1 1 1
 6 22 7 2 1 1
 6 22 7 3 2 1
 6 22 7 4 1 1
 6 22 8 1 1 1
 6 22 8 2 2 1
 6 22 8 3 1 1
 6 22 8 4 2 1
 6 22 9 1 2 1
 6 22 9 2 1 1
 6 22 9 3 1 1
 6 22 9 4 1 1
 6 22 10 1 1 1
 6 22 10 2 1 1
 6 22 10 3 1 1
 6 22 10 4 2 1
 6 22 11 1 2 1
 6 22 11 2 1 1
 6 22 11 3 2 1
 6 22 11 4 2 1
 6 22 12 1 2 1
 6 22 12 2 1 1
 6 22 12 3 1 1
 6 22 12 4 1 1
 6 22 13 1 1 1
 6 22 13 2 2 1
 6 22 13 3 1 1
 6 22 13 4 1 1
 6 22 14 1 1 1
 6 22 14 2 1 1
 6 22 14 3 1 1
 6 22 14 4 2 1
 6 22 15 1 1 1
 6 22 15 2 1 1
 6 22 15 3 1 1
 6 22 15 4 1 1
 6 22 16 1 1 1
 6 22 16 2 2 1
 6 22 16 3 2 1
 6 22 16 4 1 1
 6 22 17 1 2 1
 6 22 17 2 2 1
 6 22 17 3 2 1
 6 22 17 4 1 1
 6 22 18 1 1 1
 6 22 18 2 2 1
 6 22 18 3 1 1
 6 22 18 4 1 1
 6 22 19 1 1 1
 6 22 19 2 1 1
 6 22 19 3 2 1
 6 22 19 4 1 1
 6 22 20 1 1 1
 6 22 20 2 1 1
 6 22 20 3 1 1
 6 22 20 4 2 1
 6 22 21 1 1 1
 6 22 21 2 1 1
 6 22 21 3 1 1
 6 22 21 4 1 1
 6 22 22 1 1 1
 6 22 22 2 1 1
 6 22 22 3 1 1
 6 22 22 4 1 1
 6 22 23 1 2 1
 6 22 23 2 1 1
 6 22 23 3 1 1
 6 22 23 4 1 1
 6 22 24 1 1 1
 6 22 24 2 1 1
 6 22 24 3 1 1
 6 22 24 4 1 1
 6 22 25 1 1 1
 6 22 25 2 1 1
 6 22 25 3 1 1
 6 22 25 4 2 1
 6 22 26 1 1 1
 6 22 26 2 1 1
 6 22 26 3 1 1
 6 22 26 4 1 1
 6 22 27 1 1 1
 6 22 27 2 2 1
 6 22 27 3 1 1
 6 22 27 4 2 1
 6 22 28 1 1 1
 6 22 28 2 2 1
 6 22 28 3 1 1
 6 22 28 4 1 1
 6 22 29 1 2 1
 6 22 29 2 1 1
 6 22 29 3 1 1
 6 22 29 4 1 1
 6 22 30 1 1 1
 6 22 30 2 2 1
 6 22 30 3 2 1
 6 22 30 4 2 1
 6 22 31 1 1 1
 6 22 31 2 1 1
 6 22 31 3 1 1
 6 22 31 4 1 1
 6 22 32 1 1 1
 6 22 32 2 1 1
 6 22 32 3 2 1
 6 22 32 4 2 1
 6 23 1 1 1 1
 6 23 1 2 1 1
 6 23 1 3 2 1
 6 23 1 4 2 1
 6 23 2 1 1 1
 6 23 2 2 2 1
 6 23 2 3 1 1
 6 23 2 4 2 1
 6 23 3 1 1 1
 6 23 3 2 1 1
 6 23 3 3 1 1
 6 23 3 4 1 1
 6 23 4 1 1 1
 6 23 4 2 2 1
 6 23 4 3 1 1
 6 23 4 4 2 1
 6 23 5 1 1 1
 6 23 5 2 1 1
 6 23 5 3 2 1
 6 23 5 4 1 1
 6 23 6 1 2 1
 6 23 6 2 1 1
 6 23 6 3 1 1
 6 23 6 4 1 1
 6 23 7 1 1 1
 6 23 7 2 1 1
 6 23 7 3 2 1
 6 23 7 4 1 1
 6 23 8 1 1 1
 6 23 8 2 1 1
 6 23 8 3 1 1
 6 23 8 4 1 1
 6 23 9 1 1 1
 6 23 9 2 1 1
 6 23 9 3 1 1
 6 23 9 4 2 1
 6 23 10 1 1 1
 6 23 10 2 1 1
 6 23 10 3 1 1
 6 23 10 4 1 1
 6 23 11 1 2 1
 6 23 11 2 1 1
 6 23 11 3 1 1
 6 23 11 4 1 1
 6 23 12 1 1 1
 6 23 12 2 1 1
 6 23 12 3 2 1
 6 23 12 4 1 1
 6 23 13 1 2 1
 6 23 13 2 1 1
 6 23 13 3 1 1
 6 23 13 4 1 1
 6 23 14 1 1 1
 6 23 14 2 1 1
 6 23 14 3 1 1
 6 23 14 4 1 1
 6 23 15 1 2 1
 6 23 15 2 2 1
 6 23 15 3 1 1
 6 23 15 4 1 1
 6 23 16 1 1 1
 6 23 16 2 2 1
 6 23 16 3 1 1
 6 23 16 4 1 1
 6 23 17 1 1 1
 6 23 17 2 2 1
 6 23 17 3 2 1
 6 23 17 4 1 1
 6 23 18 1 2 1
 6 23 18 2 1 1
 6 23 18 3 1 1
 6 23 18 4 1 1
 6 23 19 1 2 1
 6 23 19 2 2 1
 6 23 19 3 1 1
 6 23 19 4 1 1
 6 23 20 1 1 1
 6 23 20 2 2 1
 6 23 20 3 2 1
 6 23 20 4 2 1
 6 23 21 1 2 1
 6 23 21 2 2 1
 6 23 21 3 1 1
 6 23 21 4 2 1
 6 23 22 1 1 1
 6 23 22 2 1 1
 6 23 22 3 1 1
 6 23 22 4 1 1
 6 23 23 1 1 1
 6 23 23 2 1 1
 6 23 23 3 1 1
 6 23 23 4 2 1
 6 23 24 1 2 1
 6 23 24 2 1 1
 6 23 24 3 1 1
 6 23 24 4 1 1
 6 23 25 1 1 1
 6 23 25 2 1 1
 6 23 25 3 1 1
 6 23 25 4 1 1
 6 23 26 1 1 1
 6 23 26 2 1 1
 6 23 26 3 2 1
 6 23 26 4 1 1
 6 23 27 1 2 1
 6 23 27 2 1 1
 6 23 27 3 1 1
 6 23 27 4 1 1
 6 23 28 1 1 1
 6 23 28 2 2 1
 6 23 28 3 1 1
 6 23 28 4 1 1
 6 23 29 1 1 1
 6 23 29 2 1 1
 6 23 29 3 1 1
 6 23 29 4 1 1
 6 23 30 1 1 1
 6 23 30 2 1 1
 6 23 30 3 1 1
 6 23 30 4 1 1
 6 23 31 1 2 1
 6 23 31 2 2 1
 6 23 31 3 1 1
 6 23 31 4 1 1
 6 23 32 1 1 1
 6 23 32 2 1 1
 6 23 32 3 1 1
 6 23 32 4 2 1
 6 24 1 1 2 1
 6 24 1 2 2 1
 6 24 1 3 1 1
 6 24 1 4 2 1
 6 24 2 1 2 1
 6 24 2 2 1 1
 6 24 2 3 2 1
 6 24 2 4 1 1
 6 24 3 1 1 1
 6 24 3 2 2 1
 6 24 3 3 1 1
 6 24 3 4 2 1
 6 24 4 1 1 1
 6 24 4 2 1 1
 6 24 4 3 1 1
 6 24 4 4 1 1
 6 24 5 1 1 1
 6 24 5 2 2 1
 6 24 5 3 1 1
 6 24 5 4 2 1
 6 24 6 1 1 1
 6 24 6 2 2 1
 6 24 6 3 2 1
 6 24 6 4 2 1
 6 24 7 1 1 1
 6 24 7 2 2 1
 6 24 7 3 1 1
 6 24 7 4 2 1
 6 24 8 1 1 1
 6 24 8 2 2 1
 6 24 8 3 1 1
 6 24 8 4 1 1
 6 24 9 1 1 1
 6 24 9 2 1 1
 6 24 9 3 1 1
 6 24 9 4 1 1
 6 24 10 1 2 1
 6 24 10 2 1 1
 6 24 10 3 2 1
 6 24 10 4 1 1
 6 24 11 1 1 1
 6 24 11 2 2 1
 6 24 11 3 1 1
 6 24 11 4 2 1
 6 24 12 1 2 1
 6 24 12 2 2 1
 6 24 12 3 1 1
 6 24 12 4 1 1
 6 24 13 1 2 1
 6 24 13 2 1 1
 6 24 13 3 1 1
 6 24 13 4 1 1
 6 24 14 1 1 1
 6 24 14 2 1 1
 6 24 14 3 1 1
 6 24 14 4 1 1
 6 24 15 1 1 1
 6 24 15 2 1 1
 6 24 15 3 1 1
 6 24 15 4 1 1
 6 24 16 1 1 1
 6 24 16 2 2 1
 6 24 16 3 1 1
 6 24 16 4 2 1
 6 24 17 1 1 1
 6 24 17 2 1 1
 6 24 17 3 2 1
 6 24 17 4 1 1
 6 24 18 1 1 1
 6 24 18 2 1 1
 6 24 18 3 2 1
 6 24 18 4 2 1
 6 24 19 1 2 1
 6 24 19 2 1 1
 6 24 19 3 1 1
 6 24 19 4 1 1
 6 24 20 1 1 1
 6 24 20 2 1 1
 6 24 20 3 1 1
 6 24 20 4 1 1
 6 24 21 1 1 1
 6 24 21 2 2 1
 6 24 21 3 1 1
 6 24 21 4 2 1
 6 24 22 1 1 1
 6 24 22 2 1 1
 6 24 22 3 1 1
 6 24 22 4 1 1
 6 24 23 1 2 1
 6 24 23 2 1 1
 6 24 23 3 1 1
 6 24 23 4 1 1
 6 24 24 1 1 1
 6 24 24 2 1 1
 6 24 24 3 2 1
 6 24 24 4 2 1
 6 24 25 1 1 1
 6 24 25 2 1 1
 6 24 25 3 1 1
 6 24 25 4 2 1
 6 24 26 1 1 1
 6 24 26 2 2 1
 6 24 26 3 1 1
 6 24 26 4 1 1
 6 24 27 1 1 1
 6 24 27 2 1 1
 6 24 27 3 1 1
 6 24 27 4 2 1
 6 24 28 1 1 1
 6 24 28 2 1 1
 6 24 28 3 1 1
 6 24 28 4 1 1
 6 24 29 1 1 1
 6 24 29 2 1 1
 6 24 29 3 2 1
 6 24 29 4 1 1
 6 24 30 1 1 1
 6 24 30 2 1 1
 6 24 30 3 1 1
 6 24 30 4 1 1
 6 24 31 1 1 1
 6 24 31 2 1 1
 6 24 31 3 1 1
 6 24 31 4 2 1
 6 24 32 1 2 1
 6 24 32 2 1 1
 6 24 32 3 1 1
 6 24 32 4 1 1
 6 25 1 1 1 1
 6 25 1 2 1 1
 6 25 1 3 2 1
 6 25 1 4 1 1
 6 25 2 1 2 1
 6 25 2 2 1 1
 6 25 2 3 1 1
 6 25 2 4 2 1
 6 25 3 1 1 1
 6 25 3 2 1 1
 6 25 3 3 1 1
 6 25 3 4 1 1
 6 25 4 1 1 1
 6 25 4 2 1 1
 6 25 4 3 1 1
 6 25 4 4 1 1
 6 25 5 1 1 1
 6 25 5 2 2 1
 6 25 5 3 1 1
 6 25 5 4 2 1
 6 25 6 1 1 1
 6 25 6 2 1 1
 6 25 6 3 2 1
 6 25 6 4 1 1
 6 25 7 1 1 1
 6 25 7 2 1 1
 6 25 7 3 1 1
 6 25 7 4 2 1
 6 25 8 1 1 1
 6 25 8 2 2 1
 6 25 8 3 2 1
 6 25 8 4 1 1
 6 25 9 1 1 1
 6 25 9 2 1 1
 6 25 9 3 1 1
 6 25 9 4 2 1
 6 25 10 1 1 1
 6 25 10 2 1 1
 6 25 10 3 1 1
 6 25 10 4 1 1
 6 25 11 1 1 1
 6 25 11 2 2 1
 6 25 11 3 1 1
 6 25 11 4 1 1
 6 25 12 1 2 1
 6 25 12 2 1 1
 6 25 12 3 2 1
 6 25 12 4 2 1
 6 25 13 1 2 1
 6 25 13 2 1 1
 6 25 13 3 1 1
 6 25 13 4 1 1
 6 25 14 1 1 1
 6 25 14 2 2 1
 6 25 14 3 1 1
 6 25 14 4 1 1
 6 25 15 1 2 1
 6 25 15 2 1 1
 6 25 15 3 1 1
 6 25 15 4 1 1
 6 25 16 1 1 1
 6 25 16 2 1 1
 6 25 16 3 1 1
 6 25 16 4 1 1
 6 25 17 1 2 1
 6 25 17 2 1 1
 6 25 17 3 1 1
 6 25 17 4 2 1
 6 25 18 1 2 1
 6 25 18 2 2 1
 6 25 18 3 1 1
 6 25 18 4 2 1
 6 25 19 1 2 1
 6 25 19 2 2 1
 6 25 19 3 1 1
 6 25 19 4 1 1
 6 25 20 1 2 1
 6 25 20 2 1 1
 6 25 20 3 1 1
 6 25 20 4 2 1
 6 25 21 1 1 1
 6 25 21 2 1 1
 6 25 21 3 1 1
 6 25 21 4 1 1
 6 25 22 1 2 1
 6 25 22 2 2 1
 6 25 22 3 2 1
 6 25 22 4 1 1
 6 25 23 1 1 1
 6 25 23 2 2 1
 6 25 23 3 1 1
 6 25 23 4 1 1
 6 25 24 1 1 1
 6 25 24 2 2 1
 6 25 24 3 1 1
 6 25 24 4 2 1
 6 25 25 1 1 1
 6 25 25 2 1 1
 6 25 25 3 1 1
 6 25 25 4 1 1
 6 25 26 1 2 1
 6 25 26 2 2 1
 6 25 26 3 1 1
 6 25 26 4 2 1
 6 25 27 1 1 1
 6 25 27 2 1 1
 6 25 27 3 1 1
 6 25 27 4 2 1
 6 25 28 1 2 1
 6 25 28 2 1 1
 6 25 28 3 2 1
 6 25 28 4 2 1
 6 25 29 1 1 1
 6 25 29 2 1 1
 6 25 29 3 1 1
 6 25 29 4 1 1
 6 25 30 1 1 1
 6 25 30 2 2 1
 6 25 30 3 1 1
 6 25 30 4 1 1
 6 25 31 1 1 1
 6 25 31 2 1 1
 6 25 31 3 1 1
 6 25 31 4 2 1
 6 25 32 1 2 1
 6 25 32 2 1 1
 6 25 32 3 1 1
 6 25 32 4 2 1
 6 26 1 1 1 1
 6 26 1 2 1 1
 6 26 1 3 1 1
 6 26 1 4 1 1
 6 26 2 1 2 1
 6 26 2 2 1 1
 6 26 2 3 1 1
 6 26 2 4 2 1
 6 26 3 1 1 1
 6 26 3 2 1 1
 6 26 3 3 1 1
 6 26 3 4 2 1
 6 26 4 1 1 1
 6 26 4 2 1 1
 6 26 4 3 1 1
 6 26 4 4 1 1
 6 26 5 1 1 1
 6 26 5 2 1 1
 6 26 5 3 1 1
 6 26 5 4 2 1
 6 26 6 1 1 1
 6 26 6 2 1 1
 6 26 6 3 1 1
 6 26 6 4 1 1
 6 26 7 1 1 1
 6 26 7 2 1 1
 6 26 7 3 2 1
 6 26 7 4 2 1
 6 26 8 1 1 1
 6 26 8 2 2 1
 6 26 8 3 1 1
 6 26 8 4 1 1
 6 26 9 1 1 1
 6 26 9 2 1 1
 6 26 9 3 2 1
 6 26 9 4 1 1
 6 26 10 1 1 1
 6 26 10 2 1 1
 6 26 10 3 1 1
 6 26 10 4 1 1
 6 26 11 1 1 1
 6 26 11 2 1 1
 6 26 11 3 1 1
 6 26 11 4 2 1
 6 26 12 1 1 1
 6 26 12 2 1 1
 6 26 12 3 1 1
 6 26 12 4 1 1
 6 26 13 1 2 1
 6 26 13 2 1 1
 6 26 13 3 1 1
 6 26 13 4 2 1
 6 26 14 1 1 1
 6 26 14 2 1 1
 6 26 14 3 1 1
 6 26 14 4 2 1
 6 26 15 1 2 1
 6 26 15 2 1 1
 6 26 15 3 1 1
 6 26 15 4 2 1
 6 26 16 1 1 1
 6 26 16 2 1 1
 6 26 16 3 1 1
 6 26 16 4 1 1
 6 26 17 1 2 1
 6 26 17 2 1 1
 6 26 17 3 1 1
 6 26 17 4 1 1
 6 26 18 1 2 1
 6 26 18 2 1 1
 6 26 18 3 1 1
 6 26 18 4 2 1
 6 26 19 1 1 1
 6 26 19 2 1 1
 6 26 19 3 2 1
 6 26 19 4 2 1
 6 26 20 1 2 1
 6 26 20 2 1 1
 6 26 20 3 1 1
 6 26 20 4 1 1
 6 26 21 1 1 1
 6 26 21 2 2 1
 6 26 21 3 2 1
 6 26 21 4 1 1
 6 26 22 1 2 1
 6 26 22 2 1 1
 6 26 22 3 2 1
 6 26 22 4 2 1
 6 26 23 1 1 1
 6 26 23 2 1 1
 6 26 23 3 1 1
 6 26 23 4 2 1
 6 26 24 1 1 1
 6 26 24 2 1 1
 6 26 24 3 2 1
 6 26 24 4 2 1
 6 26 25 1 1 1
 6 26 25 2 1 1
 6 26 25 3 2 1
 6 26 25 4 1 1
 6 26 26 1 1 1
 6 26 26 2 1 1
 6 26 26 3 2 1
 6 26 26 4 2 1
 6 26 27 1 2 1
 6 26 27 2 1 1
 6 26 27 3 1 1
 6 26 27 4 1 1
 6 26 28 1 1 1
 6 26 28 2 1 1
 6 26 28 3 2 1
 6 26 28 4 1 1
 6 26 29 1 2 1
 6 26 29 2 1 1
 6 26 29 3 1 1
 6 26 29 4 1 1
 6 26 30 1 2 1
 6 26 30 2 1 1
 6 26 30 3 1 1
 6 26 30 4 2 1
 6 26 31 1 1 1
 6 26 31 2 1 1
 6 26 31 3 1 1
 6 26 31 4 2 1
 6 26 32 1 1 1
 6 26 32 2 1 1
 6 26 32 3 1 1
 6 26 32 4 2 1
 6 27 1 1 1 1
 6 27 1 2 2 1
 6 27 1 3 1 1
 6 27 1 4 2 1
 6 27 2 1 1 1
 6 27 2 2 2 1
 6 27 2 3 1 1
 6 27 2 4 2 1
 6 27 3 1 2 1
 6 27 3 2 1 1
 6 27 3 3 1 1
 6 27 3 4 1 1
 6 27 4 1 1 1
 6 27 4 2 1 1
 6 27 4 3 1 1
 6 27 4 4 1 1
 6 27 5 1 2 1
 6 27 5 2 1 1
 6 27 5 3 2 1
 6 27 5 4 2 1
 6 27 6 1 1 1
 6 27 6 2 1 1
 6 27 6 3 1 1
 6 27 6 4 1 1
 6 27 7 1 1 1
 6 27 7 2 2 1
 6 27 7 3 2 1
 6 27 7 4 2 1
 6 27 8 1 1 1
 6 27 8 2 1 1
 6 27 8 3 1 1
 6 27 8 4 1 1
 6 27 9 1 2 1
 6 27 9 2 1 1
 6 27 9 3 2 1
 6 27 9 4 1 1
 6 27 10 1 2 1
 6 27 10 2 2 1
 6 27 10 3 1 1
 6 27 10 4 1 1
 6 27 11 1 1 1
 6 27 11 2 2 1
 6 27 11 3 1 1
 6 27 11 4 1 1
 6 27 12 1 2 1
 6 27 12 2 1 1
 6 27 12 3 1 1
 6 27 12 4 1 1
 6 27 13 1 1 1
 6 27 13 2 1 1
 6 27 13 3 1 1
 6 27 13 4 1 1
 6 27 14 1 2 1
 6 27 14 2 1 1
 6 27 14 3 1 1
 6 27 14 4 1 1
 6 27 15 1 1 1
 6 27 15 2 1 1
 6 27 15 3 1 1
 6 27 15 4 1 1
 6 27 16 1 1 1
 6 27 16 2 1 1
 6 27 16 3 1 1
 6 27 16 4 1 1
 6 27 17 1 1 1
 6 27 17 2 2 1
 6 27 17 3 2 1
 6 27 17 4 1 1
 6 27 18 1 2 1
 6 27 18 2 2 1
 6 27 18 3 1 1
 6 27 18 4 1 1
 6 27 19 1 2 1
 6 27 19 2 1 1
 6 27 19 3 1 1
 6 27 19 4 1 1
 6 27 20 1 1 1
 6 27 20 2 1 1
 6 27 20 3 1 1
 6 27 20 4 2 1
 6 27 21 1 1 1
 6 27 21 2 1 1
 6 27 21 3 1 1
 6 27 21 4 2 1
 6 27 22 1 1 1
 6 27 22 2 1 1
 6 27 22 3 1 1
 6 27 22 4 1 1
 6 27 23 1 1 1
 6 27 23 2 1 1
 6 27 23 3 1 1
 6 27 23 4 2 1
 6 27 24 1 1 1
 6 27 24 2 1 1
 6 27 24 3 1 1
 6 27 24 4 1 1
 6 27 25 1 1 1
 6 27 25 2 2 1
 6 27 25 3 1 1
 6 27 25 4 2 1
 6 27 26 1 2 1
 6 27 26 2 1 1
 6 27 26 3 2 1
 6 27 26 4 1 1
 6 27 27 1 1 1
 6 27 27 2 2 1
 6 27 27 3 2 1
 6 27 27 4 1 1
 6 27 28 1 2 1
 6 27 28 2 2 1
 6 27 28 3 2 1
 6 27 28 4 2 1
 6 27 29 1 2 1
 6 27 29 2 2 1
 6 27 29 3 1 1
 6 27 29 4 2 1
 6 27 30 1 1 1
 6 27 30 2 1 1
 6 27 30 3 1 1
 6 27 30 4 1 1
 6 27 31 1 1 1
 6 27 31 2 2 1
 6 27 31 3 1 1
 6 27 31 4 1 1
 6 27 32 1 1 1
 6 27 32 2 1 1
 6 27 32 3 1 1
 6 27 32 4 2 1
 6 28 1 1 1 1
 6 28 1 2 2 1
 6 28 1 3 1 1
 6 28 1 4 2 1
 6 28 2 1 1 1
 6 28 2 2 1 1
 6 28 2 3 1 1
 6 28 2 4 1 1
 6 28 3 1 1 1
 6 28 3 2 1 1
 6 28 3 3 2 1
 6 28 3 4 2 1
 6 28 4 1 1 1
 6 28 4 2 1 1
 6 28 4 3 1 1
 6 28 4 4 1 1
 6 28 5 1 1 1
 6 28 5 2 1 1
 6 28 5 3 1 1
 6 28 5 4 1 1
 6 28 6 1 1 1
 6 28 6 2 2 1
 6 28 6 3 1 1
 6 28 6 4 1 1
 6 28 7 1 1 1
 6 28 7 2 2 1
 6 28 7 3 2 1
 6 28 7 4 1 1
 6 28 8 1 1 1
 6 28 8 2 1 1
 6 28 8 3 2 1
 6 28 8 4 1 1
 6 28 9 1 1 1
 6 28 9 2 1 1
 6 28 9 3 1 1
 6 28 9 4 1 1
 6 28 10 1 2 1
 6 28 10 2 1 1
 6 28 10 3 1 1
 6 28 10 4 2 1
 6 28 11 1 1 1
 6 28 11 2 2 1
 6 28 11 3 1 1
 6 28 11 4 1 1
 6 28 12 1 1 1
 6 28 12 2 1 1
 6 28 12 3 1 1
 6 28 12 4 1 1
 6 28 13 1 1 1
 6 28 13 2 1 1
 6 28 13 3 1 1
 6 28 13 4 2 1
 6 28 14 1 2 1
 6 28 14 2 1 1
 6 28 14 3 1 1
 6 28 14 4 1 1
 6 28 15 1 1 1
 6 28 15 2 1 1
 6 28 15 3 2 1
 6 28 15 4 1 1
 6 28 16 1 2 1
 6 28 16 2 2 1
 6 28 16 3 2 1
 6 28 16 4 1 1
 6 28 17 1 2 1
 6 28 17 2 2 1
 6 28 17 3 1 1
 6 28 17 4 1 1
 6 28 18 1 1 1
 6 28 18 2 1 1
 6 28 18 3 1 1
 6 28 18 4 1 1
 6 28 19 1 1 1
 6 28 19 2 1 1
 6 28 19 3 2 1
 6 28 19 4 2 1
 6 28 20 1 2 1
 6 28 20 2 1 1
 6 28 20 3 1 1
 6 28 20 4 1 1
 6 28 21 1 2 1
 6 28 21 2 1 1
 6 28 21 3 2 1
 6 28 21 4 1 1
 6 28 22 1 1 1
 6 28 22 2 1 1
 6 28 22 3 1 1
 6 28 22 4 1 1
 6 28 23 1 2 1
 6 28 23 2 2 1
 6 28 23 3 2 1
 6 28 23 4 1 1
 6 28 24 1 1 1
 6 28 24 2 2 1
 6 28 24 3 1 1
 6 28 24 4 2 1
 6 28 25 1 1 1
 6 28 25 2 1 1
 6 28 25 3 2 1
 6 28 25 4 1 1
 6 28 26 1 1 1
 6 28 26 2 2 1
 6 28 26 3 1 1
 6 28 26 4 1 1
 6 28 27 1 2 1
 6 28 27 2 1 1
 6 28 27 3 1 1
 6 28 27 4 2 1
 6 28 28 1 1 1
 6 28 28 2 1 1
 6 28 28 3 1 1
 6 28 28 4 1 1
 6 28 29 1 1 1
 6 28 29 2 2 1
 6 28 29 3 2 1
 6 28 29 4 1 1
 6 28 30 1 1 1
 6 28 30 2 1 1
 6 28 30 3 1 1
 6 28 30 4 1 1
 6 28 31 1 2 1
 6 28 31 2 1 1
 6 28 31 3 2 1
 6 28 31 4 2 1
 6 28 32 1 1 1
 6 28 32 2 1 1
 6 28 32 3 2 1
 6 28 32 4 1 1
 6 29 1 1 1 1
 6 29 1 2 1 1
 6 29 1 3 2 1
 6 29 1 4 1 1
 6 29 2 1 1 1
 6 29 2 2 1 1
 6 29 2 3 2 1
 6 29 2 4 1 1
 6 29 3 1 1 1
 6 29 3 2 1 1
 6 29 3 3 2 1
 6 29 3 4 1 1
 6 29 4 1 1 1
 6 29 4 2 1 1
 6 29 4 3 1 1
 6 29 4 4 1 1
 6 29 5 1 1 1
 6 29 5 2 1 1
 6 29 5 3 1 1
 6 29 5 4 1 1
 6 29 6 1 1 1
 6 29 6 2 1 1
 6 29 6 3 2 1
 6 29 6 4 1 1
 6 29 7 1 2 1
 6 29 7 2 1 1
 6 29 7 3 1 1
 6 29 7 4 2 1
 6 29 8 1 1 1
 6 29 8 2 2 1
 6 29 8 3 2 1
 6 29 8 4 1 1
 6 29 9 1 2 1
 6 29 9 2 1 1
 6 29 9 3 1 1
 6 29 9 4 2 1
 6 29 10 1 1 1
 6 29 10 2 1 1
 6 29 10 3 1 1
 6 29 10 4 1 1
 6 29 11 1 1 1
 6 29 11 2 1 1
 6 29 11 3 1 1
 6 29 11 4 2 1
 6 29 12 1 1 1
 6 29 12 2 1 1
 6 29 12 3 1 1
 6 29 12 4 2 1
 6 29 13 1 1 1
 6 29 13 2 1 1
 6 29 13 3 1 1
 6 29 13 4 1 1
 6 29 14 1 1 1
 6 29 14 2 1 1
 6 29 14 3 2 1
 6 29 14 4 2 1
 6 29 15 1 1 1
 6 29 15 2 1 1
 6 29 15 3 2 1
 6 29 15 4 1 1
 6 29 16 1 1 1
 6 29 16 2 2 1
 6 29 16 3 1 1
 6 29 16 4 2 1
 6 29 17 1 2 1
 6 29 17 2 2 1
 6 29 17 3 1 1
 6 29 17 4 1 1
 6 29 18 1 1 1
 6 29 18 2 2 1
 6 29 18 3 1 1
 6 29 18 4 2 1
 6 29 19 1 2 1
 6 29 19 2 1 1
 6 29 19 3 1 1
 6 29 19 4 2 1
 6 29 20 1 2 1
 6 29 20 2 1 1
 6 29 20 3 1 1
 6 29 20 4 1 1
 6 29 21 1 2 1
 6 29 21 2 1 1
 6 29 21 3 1 1
 6 29 21 4 1 1
 6 29 22 1 1 1
 6 29 22 2 1 1
 6 29 22 3 1 1
 6 29 22 4 1 1
 6 29 23 1 1 1
 6 29 23 2 1 1
 6 29 23 3 1 1
 6 29 23 4 1 1
 6 29 24 1 1 1
 6 29 24 2 1 1
 6 29 24 3 2 1
 6 29 24 4 1 1
 6 29 25 1 2 1
 6 29 25 2 2 1
 6 29 25 3 2 1
 6 29 25 4 1 1
 6 29 26 1 1 1
 6 29 26 2 1 1
 6 29 26 3 1 1
 6 29 26 4 1 1
 6 29 27 1 1 1
 6 29 27 2 1 1
 6 29 27 3 2 1
 6 29 27 4 2 1
 6 29 28 1 2 1
 6 29 28 2 1 1
 6 29 28 3 1 1
 6 29 28 4 2 1
 6 29 29 1 1 1
 6 29 29 2 2 1
 6 29 29 3 1 1
 6 29 29 4 2 1
 6 29 30 1 1 1
 6 29 30 2 1 1
 6 29 30 3 1 1
 6 29 30 4 1 1
 6 29 31 1 1 1
 6 29 31 2 2 1
 6 29 31 3 2 1
 6 29 31 4 1 1
 6 29 32 1 2 1
 6 29 32 2 2 1
 6 29 32 3 1 1
 6 29 32 4 1 1
 6 30 1 1 1 1
 6 30 1 2 1 1
 6 30 1 3 1 1
 6 30 1 4 1 1
 6 30 2 1 1 1
 6 30 2 2 1 1
 6 30 2 3 1 1
 6 30 2 4 1 1
 6 30 3 1 1 1
 6 30 3 2 2 1
 6 30 3 3 1 1
 6 30 3 4 1 1
 6 30 4 1 1 1
 6 30 4 2 2 1
 6 30 4 3 2 1
 6 30 4 4 1 1
 6 30 5 1 1 1
 6 30 5 2 1 1
 6 30 5 3 1 1
 6 30 5 4 1 1
 6 30 6 1 1 1
 6 30 6 2 1 1
 6 30 6 3 2 1
 6 30 6 4 2 1
 6 30 7 1 1 1
 6 30 7 2 2 1
 6 30 7 3 1 1
 6 30 7 4 1 1
 6 30 8 1 1 1
 6 30 8 2 1 1
 6 30 8 3 1 1
 6 30 8 4 2 1
 6 30 9 1 2 1
 6 30 9 2 2 1
 6 30 9 3 1 1
 6 30 9 4 2 1
 6 30 10 1 1 1
 6 30 10 2 2 1
 6 30 10 3 1 1
 6 30 10 4 1 1
 6 30 11 1 1 1
 6 30 11 2 2 1
 6 30 11 3 1 1
 6 30 11 4 2 1
 6 30 12 1 2 1
 6 30 12 2 2 1
 6 30 12 3 1 1
 6 30 12 4 2 1
 6 30 13 1 1 1
 6 30 13 2 2 1
 6 30 13 3 1 1
 6 30 13 4 2 1
 6 30 14 1 2 1
 6 30 14 2 1 1
 6 30 14 3 1 1
 6 30 14 4 1 1
 6 30 15 1 1 1
 6 30 15 2 2 1
 6 30 15 3 2 1
 6 30 15 4 2 1
 6 30 16 1 1 1
 6 30 16 2 2 1
 6 30 16 3 1 1
 6 30 16 4 2 1
 6 30 17 1 1 1
 6 30 17 2 1 1
 6 30 17 3 2 1
 6 30 17 4 1 1
 6 30 18 1 1 1
 6 30 18 2 2 1
 6 30 18 3 1 1
 6 30 18 4 1 1
 6 30 19 1 1 1
 6 30 19 2 1 1
 6 30 19 3 2 1
 6 30 19 4 1 1
 6 30 20 1 1 1
 6 30 20 2 1 1
 6 30 20 3 1 1
 6 30 20 4 1 1
 6 30 21 1 1 1
 6 30 21 2 1 1
 6 30 21 3 1 1
 6 30 21 4 1 1
 6 30 22 1 1 1
 6 30 22 2 2 1
 6 30 22 3 1 1
 6 30 22 4 2 1
 6 30 23 1 1 1
 6 30 23 2 1 1
 6 30 23 3 2 1
 6 30 23 4 1 1
 6 30 24 1 1 1
 6 30 24 2 2 1
 6 30 24 3 1 1
 6 30 24 4 1 1
 6 30 25 1 1 1
 6 30 25 2 2 1
 6 30 25 3 1 1
 6 30 25 4 1 1
 6 30 26 1 2 1
 6 30 26 2 1 1
 6 30 26 3 1 1
 6 30 26 4 1 1
 6 30 27 1 1 1
 6 30 27 2 1 1
 6 30 27 3 2 1
 6 30 27 4 1 1
 6 30 28 1 1 1
 6 30 28 2 1 1
 6 30 28 3 2 1
 6 30 28 4 1 1
 6 30 29 1 1 1
 6 30 29 2 1 1
 6 30 29 3 1 1
 6 30 29 4 2 1
 6 30 30 1 2 1
 6 30 30 2 1 1
 6 30 30 3 1 1
 6 30 30 4 1 1
 6 30 31 1 1 1
 6 30 31 2 1 1
 6 30 31 3 2 1
 6 30 31 4 1 1
 6 30 32 1 1 1
 6 30 32 2 1 1
 6 30 32 3 2 1
 6 30 32 4 2 1
 6 31 1 1 1 1
 6 31 1 2 1 1
 6 31 1 3 2 1
 6 31 1 4 1 1
 6 31 2 1 2 1
 6 31 2 2 1 1
 6 31 2 3 2 1
 6 31 2 4 2 1
 6 31 3 1 1 1
 6 31 3 2 1 1
 6 31 3 3 1 1
 6 31 3 4 1 1
 6 31 4 1 1 1
 6 31 4 2 1 1
 6 31 4 3 1 1
 6 31 4 4 1 1
 6 31 5 1 1 1
 6 31 5 2 2 1
 6 31 5 3 1 1
 6 31 5 4 2 1
 6 31 6 1 1 1
 6 31 6 2 2 1
 6 31 6 3 2 1
 6 31 6 4 1 1
 6 31 7 1 1 1
 6 31 7 2 1 1
 6 31 7 3 2 1
 6 31 7 4 1 1
 6 31 8 1 2 1
 6 31 8 2 1 1
 6 31 8 3 1 1
 6 31 8 4 2 1
 6 31 9 1 1 1
 6 31 9 2 2 1
 6 31 9 3 2 1
 6 31 9 4 1 1
 6 31 10 1 1 1
 6 31 10 2 1 1
 6 31 10 3 1 1
 6 31 10 4 1 1
 6 31 11 1 1 1
 6 31 11 2 1 1
 6 31 11 3 1 1
 6 31 11 4 1 1
 6 31 12 1 1 1
 6 31 12 2 2 1
 6 31 12 3 1 1
 6 31 12 4 1 1
 6 31 13 1 1 1
 6 31 13 2 1 1
 6 31 13 3 1 1
 6 31 13 4 1 1
 6 31 14 1 1 1
 6 31 14 2 1 1
 6 31 14 3 2 1
 6 31 14 4 2 1
 6 31 15 1 1 1
 6 31 15 2 1 1
 6 31 15 3 2 1
 6 31 15 4 1 1
 6 31 16 1 1 1
 6 31 16 2 2 1
 6 31 16 3 2 1
 6 31 16 4 2 1
 6 31 17 1 1 1
 6 31 17 2 1 1
 6 31 17 3 1 1
 6 31 17 4 1 1
 6 31 18 1 1 1
 6 31 18 2 1 1
 6 31 18 3 2 1
 6 31 18 4 1 1
 6 31 19 1 2 1
 6 31 19 2 2 1
 6 31 19 3 1 1
 6 31 19 4 1 1
 6 31 20 1 2 1
 6 31 20 2 1 1
 6 31 20 3 1 1
 6 31 20 4 2 1
 6 31 21 1 1 1
 6 31 21 2 2 1
 6 31 21 3 1 1
 6 31 21 4 2 1
 6 31 22 1 2 1
 6 31 22 2 2 1
 6 31 22 3 2 1
 6 31 22 4 1 1
 6 31 23 1 1 1
 6 31 23 2 1 1
 6 31 23 3 2 1
 6 31 23 4 2 1
 6 31 24 1 1 1
 6 31 24 2 1 1
 6 31 24 3 1 1
 6 31 24 4 1 1
 6 31 25 1 1 1
 6 31 25 2 2 1
 6 31 25 3 2 1
 6 31 25 4 1 1
 6 31 26 1 2 1
 6 31 26 2 2 1
 6 31 26 3 2 1
 6 31 26 4 1 1
 6 31 27 1 2 1
 6 31 27 2 1 1
 6 31 27 3 2 1
 6 31 27 4 2 1
 6 31 28 1 2 1
 6 31 28 2 1 1
 6 31 28 3 1 1
 6 31 28 4 1 1
 6 31 29 1 2 1
 6 31 29 2 2 1
 6 31 29 3 1 1
 6 31 29 4 2 1
 6 31 30 1 1 1
 6 31 30 2 1 1
 6 31 30 3 1 1
 6 31 30 4 1 1
 6 31 31 1 1 1
 6 31 31 2 1 1
 6 31 31 3 1 1
 6 31 31 4 1 1
 6 31 32 1 1 1
 6 31 32 2 2 1
 6 31 32 3 1 1
 6 31 32 4 1 1
 6 32 1 1 2 1
 6 32 1 2 2 1
 6 32 1 3 1 1
 6 32 1 4 1 1
 6 32 2 1 1 1
 6 32 2 2 1 1
 6 32 2 3 2 1
 6 32 2 4 1 1
 6 32 3 1 1 1
 6 32 3 2 2 1
 6 32 3 3 2 1
 6 32 3 4 1 1
 6 32 4 1 2 1
 6 32 4 2 1 1
 6 32 4 3 1 1
 6 32 4 4 1 1
 6 32 5 1 2 1
 6 32 5 2 1 1
 6 32 5 3 1 1
 6 32 5 4 1 1
 6 32 6 1 1 1
 6 32 6 2 1 1
 6 32 6 3 1 1
 6 32 6 4 2 1
 6 32 7 1 2 1
 6 32 7 2 2 1
 6 32 7 3 1 1
 6 32 7 4 1 1
 6 32 8 1 1 1
 6 32 8 2 2 1
 6 32 8 3 1 1
 6 32 8 4 1 1
 6 32 9 1 2 1
 6 32 9 2 1 1
 6 32 9 3 2 1
 6 32 9 4 1 1
 6 32 10 1 1 1
 6 32 10 2 1 1
 6 32 10 3 1 1
 6 32 10 4 1 1
 6 32 11 1 1 1
 6 32 11 2 1 1
 6 32 11 3 2 1
 6 32 11 4 2 1
 6 32 12 1 1 1
 6 32 12 2 1 1
 6 32 12 3 1 1
 6 32 12 4 2 1
 6 32 13 1 1 1
 6 32 13 2 1 1
 6 32 13 3 1 1
 6 32 13 4 1 1
 6 32 14 1 2 1
 6 32 14 2 1 1
 6 32 14 3 1 1
 6 32 14 4 2 1
 6 32 15 1 1 1
 6 32 15 2 1 1
 6 32 15 3 1 1
 6 32 15 4 2 1
 6 32 16 1 1 1
 6 32 16 2 1 1
 6 32 16 3 1 1
 6 32 16 4 1 1
 6 32 17 1 1 1
 6 32 17 2 1 1
 6 32 17 3 1 1
 6 32 17 4 2 1
 6 32 18 1 1 1
 6 32 18 2 1 1
 6 32 18 3 1 1
 6 32 18 4 1 1
 6 32 19 1 1 1
 6 32 19 2 1 1
 6 32 19 3 1 1
 6 32 19 4 2 1
 6 32 20 1 1 1
 6 32 20 2 2 1
 6 32 20 3 1 1
 6 32 20 4 1 1
 6 32 21 1 2 1
 6 32 21 2 1 1
 6 32 21 3 1 1
 6 32 21 4 1 1
 6 32 22 1 1 1
 6 32 22 2 1 1
 6 32 22 3 2 1
 6 32 22 4 2 1
 6 32 23 1 1 1
 6 32 23 2 2 1
 6 32 23 3 2 1
 6 32 23 4 1 1
 6 32 24 1 1 1
 6 32 24 2 2 1
 6 32 24 3 1 1
 6 32 24 4 2 1
 6 32 25 1 1 1
 6 32 25 2 2 1
 6 32 25 3 1 1
 6 32 25 4 2 1
 6 32 26 1 1 1
 6 32 26 2 2 1
 6 32 26 3 1 1
 6 32 26 4 1 1
 6 32 27 1 2 1
 6 32 27 2 1 1
 6 32 27 3 1 1
 6 32 27 4 2 1
 6 32 28 1 1 1
 6 32 28 2 2 1
 6 32 28 3 1 1
 6 32 28 4 1 1
 6 32 29 1 1 1
 6 32 29 2 1 1
 6 32 29 3 1 1
 6 32 29 4 2 1
 6 32 30 1 1 1
 6 32 30 2 1 1
 6 32 30 3 1 1
 6 32 30 4 2 1
 6 32 31 1 1 1
 6 32 31 2 1 1
 6 32 31 3 1 1
 6 32 31 4 1 1
 6 32 32 1 1 1
 6 32 32 2 2 1
 6 32 32 3 2 1
 6 32 32 4 1 1
 7 1 1 1 1 1
 7 1 1 2 1 1
 7 1 1 3 1 1
 7 1 1 4 2 1
 7 1 2 1 1 1
 7 1 2 2 1 1
 7 1 2 3 2 1
 7 1 2 4 2 1
 7 1 3 1 1 1
 7 1 3 2 1 1
 7 1 3 3 1 1
 7 1 3 4 1 1
 7 1 4 1 1 1
 7 1 4 2 1 1
 7 1 4 3 1 1
 7 1 4 4 1 1
 7 1 5 1 1 1
 7 1 5 2 1 1
 7 1 5 3 1 1
 7 1 5 4 1 1
 7 1 6 1 1 1
 7 1 6 2 1 1
 7 1 6 3 1 1
 7 1 6 4 1 1
 7 1 7 1 1 1
 7 1 7 2 2 1
 7 1 7 3 2 1
 7 1 7 4 1 1
 7 1 8 1 1 1
 7 1 8 2 2 1
 7 1 8 3 1 1
 7 1 8 4 2 1
 7 1 9 1 2 1
 7 1 9 2 2 1
 7 1 9 3 2 1
 7 1 9 4 1 1
 7 1 10 1 1 1
 7 1 10 2 2 1
 7 1 10 3 2 1
 7 1 10 4 1 1
 7 1 11 1 2 1
 7 1 11 2 1 1
 7 1 11 3 1 1
 7 1 11 4 1 1
 7 1 12 1 1 1
 7 1 12 2 1 1
 7 1 12 3 1 1
 7 1 12 4 1 1
 7 1 13 1 1 1
 7 1 13 2 2 1
 7 1 13 3 2 1
 7 1 13 4 2 1
 7 1 14 1 2 1
 7 1 14 2 2 1
 7 1 14 3 1 1
 7 1 14 4 2 1
 7 1 15 1 1 1
 7 1 15 2 1 1
 7 1 15 3 1 1
 7 1 15 4 2 1
 7 1 16 1 1 1
 7 1 16 2 1 1
 7 1 16 3 1 1
 7 1 16 4 1 1
 7 1 17 1 1 1
 7 1 17 2 2 1
 7 1 17 3 1 1
 7 1 17 4 1 1
 7 1 18 1 1 1
 7 1 18 2 1 1
 7 1 18 3 1 1
 7 1 18 4 2 1
 7 1 19 1 2 1
 7 1 19 2 1 1
 7 1 19 3 2 1
 7 1 19 4 1 1
 7 1 20 1 1 1
 7 1 20 2 2 1
 7 1 20 3 1 1
 7 1 20 4 2 1
 7 1 21 1 1 1
 7 1 21 2 1 1
 7 1 21 3 2 1
 7 1 21 4 1 1
 7 1 22 1 1 1
 7 1 22 2 1 1
 7 1 22 3 1 1
 7 1 22 4 2 1
 7 1 23 1 1 1
 7 1 23 2 1 1
 7 1 23 3 2 1
 7 1 23 4 1 1
 7 1 24 1 1 1
 7 1 24 2 1 1
 7 1 24 3 1 1
 7 1 24 4 2 1
 7 1 25 1 1 1
 7 1 25 2 1 1
 7 1 25 3 1 1
 7 1 25 4 1 1
 7 1 26 1 2 1
 7 1 26 2 1 1
 7 1 26 3 1 1
 7 1 26 4 2 1
 7 1 27 1 1 1
 7 1 27 2 1 1
 7 1 27 3 2 1
 7 1 27 4 1 1
 7 1 28 1 1 1
 7 1 28 2 1 1
 7 1 28 3 2 1
 7 1 28 4 2 1
 7 1 29 1 1 1
 7 1 29 2 1 1
 7 1 29 3 2 1
 7 1 29 4 1 1
 7 1 30 1 2 1
 7 1 30 2 1 1
 7 1 30 3 1 1
 7 1 30 4 2 1
 7 1 31 1 2 1
 7 1 31 2 1 1
 7 1 31 3 2 1
 7 1 31 4 1 1
 7 1 32 1 2 1
 7 1 32 2 1 1
 7 1 32 3 2 1
 7 1 32 4 1 1
 7 2 1 1 1 1
 7 2 1 2 1 1
 7 2 1 3 2 1
 7 2 1 4 1 1
 7 2 2 1 1 1
 7 2 2 2 1 1
 7 2 2 3 2 1
 7 2 2 4 2 1
 7 2 3 1 1 1
 7 2 3 2 1 1
 7 2 3 3 2 1
 7 2 3 4 2 1
 7 2 4 1 1 1
 7 2 4 2 1 1
 7 2 4 3 2 1
 7 2 4 4 2 1
 7 2 5 1 1 1
 7 2 5 2 2 1
 7 2 5 3 1 1
 7 2 5 4 2 1
 7 2 6 1 2 1
 7 2 6 2 1 1
 7 2 6 3 2 1
 7 2 6 4 2 1
 7 2 7 1 1 1
 7 2 7 2 1 1
 7 2 7 3 1 1
 7 2 7 4 1 1
 7 2 8 1 1 1
 7 2 8 2 2 1
 7 2 8 3 1 1
 7 2 8 4 1 1
 7 2 9 1 1 1
 7 2 9 2 1 1
 7 2 9 3 1 1
 7 2 9 4 1 1
 7 2 10 1 2 1
 7 2 10 2 1 1
 7 2 10 3 1 1
 7 2 10 4 1 1
 7 2 11 1 2 1
 7 2 11 2 1 1
 7 2 11 3 1 1
 7 2 11 4 2 1
 7 2 12 1 2 1
 7 2 12 2 1 1
 7 2 12 3 1 1
 7 2 12 4 1 1
 7 2 13 1 1 1
 7 2 13 2 2 1
 7 2 13 3 2 1
 7 2 13 4 1 1
 7 2 14 1 2 1
 7 2 14 2 1 1
 7 2 14 3 1 1
 7 2 14 4 1 1
 7 2 15 1 2 1
 7 2 15 2 1 1
 7 2 15 3 1 1
 7 2 15 4 2 1
 7 2 16 1 1 1
 7 2 16 2 2 1
 7 2 16 3 1 1
 7 2 16 4 1 1
 7 2 17 1 1 1
 7 2 17 2 2 1
 7 2 17 3 1 1
 7 2 17 4 2 1
 7 2 18 1 1 1
 7 2 18 2 2 1
 7 2 18 3 1 1
 7 2 18 4 2 1
 7 2 19 1 1 1
 7 2 19 2 1 1
 7 2 19 3 1 1
 7 2 19 4 2 1
 7 2 20 1 2 1
 7 2 20 2 1 1
 7 2 20 3 1 1
 7 2 20 4 1 1
 7 2 21 1 1 1
 7 2 21 2 1 1
 7 2 21 3 1 1
 7 2 21 4 1 1
 7 2 22 1 1 1
 7 2 22 2 1 1
 7 2 22 3 1 1
 7 2 22 4 1 1
 7 2 23 1 1 1
 7 2 23 2 1 1
 7 2 23 3 1 1
 7 2 23 4 1 1
 7 2 24 1 1 1
 7 2 24 2 1 1
 7 2 24 3 1 1
 7 2 24 4 1 1
 7 2 25 1 1 1
 7 2 25 2 1 1
 7 2 25 3 2 1
 7 2 25 4 2 1
 7 2 26 1 1 1
 7 2 26 2 2 1
 7 2 26 3 1 1
 7 2 26 4 1 1
 7 2 27 1 2 1
 7 2 27 2 1 1
 7 2 27 3 1 1
 7 2 27 4 1 1
 7 2 28 1 2 1
 7 2 28 2 2 1
 7 2 28 3 1 1
 7 2 28 4 1 1
 7 2 29 1 1 1
 7 2 29 2 2 1
 7 2 29 3 2 1
 7 2 29 4 2 1
 7 2 30 1 2 1
 7 2 30 2 1 1
 7 2 30 3 1 1
 7 2 30 4 1 1
 7 2 31 1 2 1
 7 2 31 2 2 1
 7 2 31 3 1 1
 7 2 31 4 1 1
 7 2 32 1 1 1
 7 2 32 2 1 1
 7 2 32 3 1 1
 7 2 32 4 2 1
 7 3 1 1 1 1
 7 3 1 2 1 1
 7 3 1 3 1 1
 7 3 1 4 1 1
 7 3 2 1 1 1
 7 3 2 2 1 1
 7 3 2 3 1 1
 7 3 2 4 1 1
 7 3 3 1 2 1
 7 3 3 2 2 1
 7 3 3 3 2 1
 7 3 3 4 1 1
 7 3 4 1 1 1
 7 3 4 2 1 1
 7 3 4 3 2 1
 7 3 4 4 1 1
 7 3 5 1 2 1
 7 3 5 2 2 1
 7 3 5 3 1 1
 7 3 5 4 1 1
 7 3 6 1 1 1
 7 3 6 2 1 1
 7 3 6 3 1 1
 7 3 6 4 1 1
 7 3 7 1 2 1
 7 3 7 2 1 1
 7 3 7 3 1 1
 7 3 7 4 1 1
 7 3 8 1 1 1
 7 3 8 2 1 1
 7 3 8 3 1 1
 7 3 8 4 1 1
 7 3 9 1 1 1
 7 3 9 2 2 1
 7 3 9 3 2 1
 7 3 9 4 2 1
 7 3 10 1 1 1
 7 3 10 2 1 1
 7 3 10 3 1 1
 7 3 10 4 1 1
 7 3 11 1 1 1
 7 3 11 2 1 1
 7 3 11 3 1 1
 7 3 11 4 2 1
 7 3 12 1 1 1
 7 3 12 2 2 1
 7 3 12 3 1 1
 7 3 12 4 2 1
 7 3 13 1 1 1
 7 3 13 2 2 1
 7 3 13 3 1 1
 7 3 13 4 1 1
 7 3 14 1 1 1
 7 3 14 2 1 1
 7 3 14 3 1 1
 7 3 14 4 1 1
 7 3 15 1 1 1
 7 3 15 2 2 1
 7 3 15 3 1 1
 7 3 15 4 2 1
 7 3 16 1 1 1
 7 3 16 2 2 1
 7 3 16 3 2 1
 7 3 16 4 1 1
 7 3 17 1 1 1
 7 3 17 2 1 1
 7 3 17 3 1 1
 7 3 17 4 1 1
 7 3 18 1 2 1
 7 3 18 2 1 1
 7 3 18 3 1 1
 7 3 18 4 2 1
 7 3 19 1 1 1
 7 3 19 2 1 1
 7 3 19 3 1 1
 7 3 19 4 2 1
 7 3 20 1 2 1
 7 3 20 2 1 1
 7 3 20 3 1 1
 7 3 20 4 1 1
 7 3 21 1 2 1
 7 3 21 2 1 1
 7 3 21 3 1 1
 7 3 21 4 1 1
 7 3 22 1 1 1
 7 3 22 2 1 1
 7 3 22 3 1 1
 7 3 22 4 1 1
 7 3 23 1 1 1
 7 3 23 2 2 1
 7 3 23 3 2 1
 7 3 23 4 1 1
 7 3 24 1 1 1
 7 3 24 2 2 1
 7 3 24 3 2 1
 7 3 24 4 2 1
 7 3 25 1 2 1
 7 3 25 2 1 1
 7 3 25 3 1 1
 7 3 25 4 1 1
 7 3 26 1 1 1
 7 3 26 2 1 1
 7 3 26 3 1 1
 7 3 26 4 2 1
 7 3 27 1 1 1
 7 3 27 2 1 1
 7 3 27 3 2 1
 7 3 27 4 2 1
 7 3 28 1 1 1
 7 3 28 2 2 1
 7 3 28 3 1 1
 7 3 28 4 2 1
 7 3 29 1 2 1
 7 3 29 2 1 1
 7 3 29 3 1 1
 7 3 29 4 1 1
 7 3 30 1 1 1
 7 3 30 2 1 1
 7 3 30 3 2 1
 7 3 30 4 1 1
 7 3 31 1 2 1
 7 3 31 2 1 1
 7 3 31 3 1 1
 7 3 31 4 1 1
 7 3 32 1 1 1
 7 3 32 2 2 1
 7 3 32 3 2 1
 7 3 32 4 1 1
 7 4 1 1 2 1
 7 4 1 2 1 1
 7 4 1 3 1 1
 7 4 1 4 1 1
 7 4 2 1 1 1
 7 4 2 2 1 1
 7 4 2 3 2 1
 7 4 2 4 1 1
 7 4 3 1 1 1
 7 4 3 2 1 1
 7 4 3 3 1 1
 7 4 3 4 1 1
 7 4 4 1 2 1
 7 4 4 2 1 1
 7 4 4 3 1 1
 7 4 4 4 1 1
 7 4 5 1 1 1
 7 4 5 2 1 1
 7 4 5 3 2 1
 7 4 5 4 2 1
 7 4 6 1 1 1
 7 4 6 2 2 1
 7 4 6 3 2 1
 7 4 6 4 2 1
 7 4 7 1 1 1
 7 4 7 2 1 1
 7 4 7 3 1 1
 7 4 7 4 1 1
 7 4 8 1 1 1
 7 4 8 2 1 1
 7 4 8 3 1 1
 7 4 8 4 1 1
 7 4 9 1 1 1
 7 4 9 2 2 1
 7 4 9 3 2 1
 7 4 9 4 1 1
 7 4 10 1 1 1
 7 4 10 2 1 1
 7 4 10 3 1 1
 7 4 10 4 1 1
 7 4 11 1 2 1
 7 4 11 2 1 1
 7 4 11 3 1 1
 7 4 11 4 2 1
 7 4 12 1 1 1
 7 4 12 2 2 1
 7 4 12 3 2 1
 7 4 12 4 1 1
 7 4 13 1 1 1
 7 4 13 2 2 1
 7 4 13 3 1 1
 7 4 13 4 2 1
 7 4 14 1 1 1
 7 4 14 2 2 1
 7 4 14 3 1 1
 7 4 14 4 1 1
 7 4 15 1 1 1
 7 4 15 2 1 1
 7 4 15 3 1 1
 7 4 15 4 1 1
 7 4 16 1 1 1
 7 4 16 2 1 1
 7 4 16 3 1 1
 7 4 16 4 1 1
 7 4 17 1 2 1
 7 4 17 2 1 1
 7 4 17 3 1 1
 7 4 17 4 1 1
 7 4 18 1 1 1
 7 4 18 2 1 1
 7 4 18 3 1 1
 7 4 18 4 1 1
 7 4 19 1 2 1
 7 4 19 2 1 1
 7 4 19 3 2 1
 7 4 19 4 2 1
 7 4 20 1 2 1
 7 4 20 2 1 1
 7 4 20 3 2 1
 7 4 20 4 2 1
 7 4 21 1 1 1
 7 4 21 2 1 1
 7 4 21 3 1 1
 7 4 21 4 1 1
 7 4 22 1 1 1
 7 4 22 2 1 1
 7 4 22 3 2 1
 7 4 22 4 2 1
 7 4 23 1 1 1
 7 4 23 2 1 1
 7 4 23 3 1 1
 7 4 23 4 2 1
 7 4 24 1 1 1
 7 4 24 2 1 1
 7 4 24 3 1 1
 7 4 24 4 1 1
 7 4 25 1 1 1
 7 4 25 2 1 1
 7 4 25 3 2 1
 7 4 25 4 1 1
 7 4 26 1 1 1
 7 4 26 2 1 1
 7 4 26 3 2 1
 7 4 26 4 2 1
 7 4 27 1 1 1
 7 4 27 2 2 1
 7 4 27 3 1 1
 7 4 27 4 2 1
 7 4 28 1 2 1
 7 4 28 2 2 1
 7 4 28 3 1 1
 7 4 28 4 1 1
 7 4 29 1 1 1
 7 4 29 2 1 1
 7 4 29 3 1 1
 7 4 29 4 1 1
 7 4 30 1 2 1
 7 4 30 2 2 1
 7 4 30 3 1 1
 7 4 30 4 1 1
 7 4 31 1 1 1
 7 4 31 2 1 1
 7 4 31 3 1 1
 7 4 31 4 2 1
 7 4 32 1 1 1
 7 4 32 2 2 1
 7 4 32 3 1 1
 7 4 32 4 1 1
 7 5 1 1 1 1
 7 5 1 2 2 1
 7 5 1 3 2 1
 7 5 1 4 1 1
 7 5 2 1 2 1
 7 5 2 2 1 1
 7 5 2 3 1 1
 7 5 2 4 1 1
 7 5 3 1 2 1
 7 5 3 2 2 1
 7 5 3 3 2 1
 7 5 3 4 1 1
 7 5 4 1 1 1
 7 5 4 2 1 1
 7 5 4 3 2 1
 7 5 4 4 1 1
 7 5 5 1 1 1
 7 5 5 2 1 1
 7 5 5 3 2 1
 7 5 5 4 1 1
 7 5 6 1 2 1
 7 5 6 2 1 1
 7 5 6 3 1 1
 7 5 6 4 2 1
 7 5 7 1 1 1
 7 5 7 2 1 1
 7 5 7 3 1 1
 7 5 7 4 2 1
 7 5 8 1 2 1
 7 5 8 2 1 1
 7 5 8 3 1 1
 7 5 8 4 1 1
 7 5 9 1 1 1
 7 5 9 2 1 1
 7 5 9 3 2 1
 7 5 9 4 2 1
 7 5 10 1 1 1
 7 5 10 2 2 1
 7 5 10 3 2 1
 7 5 10 4 1 1
 7 5 11 1 1 1
 7 5 11 2 1 1
 7 5 11 3 1 1
 7 5 11 4 1 1
 7 5 12 1 1 1
 7 5 12 2 2 1
 7 5 12 3 2 1
 7 5 12 4 1 1
 7 5 13 1 2 1
 7 5 13 2 1 1
 7 5 13 3 2 1
 7 5 13 4 1 1
 7 5 14 1 1 1
 7 5 14 2 2 1
 7 5 14 3 1 1
 7 5 14 4 2 1
 7 5 15 1 1 1
 7 5 15 2 1 1
 7 5 15 3 1 1
 7 5 15 4 1 1
 7 5 16 1 2 1
 7 5 16 2 2 1
 7 5 16 3 1 1
 7 5 16 4 1 1
 7 5 17 1 1 1
 7 5 17 2 1 1
 7 5 17 3 1 1
 7 5 17 4 1 1
 7 5 18 1 1 1
 7 5 18 2 1 1
 7 5 18 3 2 1
 7 5 18 4 1 1
 7 5 19 1 1 1
 7 5 19 2 1 1
 7 5 19 3 2 1
 7 5 19 4 1 1
 7 5 20 1 1 1
 7 5 20 2 1 1
 7 5 20 3 1 1
 7 5 20 4 1 1
 7 5 21 1 1 1
 7 5 21 2 1 1
 7 5 21 3 1 1
 7 5 21 4 2 1
 7 5 22 1 1 1
 7 5 22 2 1 1
 7 5 22 3 2 1
 7 5 22 4 1 1
 7 5 23 1 1 1
 7 5 23 2 1 1
 7 5 23 3 1 1
 7 5 23 4 1 1
 7 5 24 1 1 1
 7 5 24 2 1 1
 7 5 24 3 1 1
 7 5 24 4 1 1
 7 5 25 1 1 1
 7 5 25 2 1 1
 7 5 25 3 1 1
 7 5 25 4 1 1
 7 5 26 1 1 1
 7 5 26 2 1 1
 7 5 26 3 1 1
 7 5 26 4 1 1
 7 5 27 1 1 1
 7 5 27 2 1 1
 7 5 27 3 1 1
 7 5 27 4 1 1
 7 5 28 1 1 1
 7 5 28 2 1 1
 7 5 28 3 1 1
 7 5 28 4 2 1
 7 5 29 1 2 1
 7 5 29 2 2 1
 7 5 29 3 1 1
 7 5 29 4 2 1
 7 5 30 1 1 1
 7 5 30 2 2 1
 7 5 30 3 2 1
 7 5 30 4 2 1
 7 5 31 1 2 1
 7 5 31 2 2 1
 7 5 31 3 1 1
 7 5 31 4 1 1
 7 5 32 1 1 1
 7 5 32 2 1 1
 7 5 32 3 2 1
 7 5 32 4 1 1
 7 6 1 1 2 1
 7 6 1 2 2 1
 7 6 1 3 1 1
 7 6 1 4 1 1
 7 6 2 1 1 1
 7 6 2 2 1 1
 7 6 2 3 1 1
 7 6 2 4 1 1
 7 6 3 1 2 1
 7 6 3 2 1 1
 7 6 3 3 2 1
 7 6 3 4 1 1
 7 6 4 1 1 1
 7 6 4 2 2 1
 7 6 4 3 2 1
 7 6 4 4 1 1
 7 6 5 1 2 1
 7 6 5 2 2 1
 7 6 5 3 1 1
 7 6 5 4 2 1
 7 6 6 1 1 1
 7 6 6 2 1 1
 7 6 6 3 1 1
 7 6 6 4 2 1
 7 6 7 1 1 1
 7 6 7 2 2 1
 7 6 7 3 1 1
 7 6 7 4 1 1
 7 6 8 1 1 1
 7 6 8 2 1 1
 7 6 8 3 2 1
 7 6 8 4 1 1
 7 6 9 1 1 1
 7 6 9 2 1 1
 7 6 9 3 2 1
 7 6 9 4 1 1
 7 6 10 1 1 1
 7 6 10 2 1 1
 7 6 10 3 1 1
 7 6 10 4 1 1
 7 6 11 1 1 1
 7 6 11 2 1 1
 7 6 11 3 1 1
 7 6 11 4 2 1
 7 6 12 1 1 1
 7 6 12 2 1 1
 7 6 12 3 2 1
 7 6 12 4 2 1
 7 6 13 1 2 1
 7 6 13 2 2 1
 7 6 13 3 1 1
 7 6 13 4 2 1
 7 6 14 1 1 1
 7 6 14 2 2 1
 7 6 14 3 1 1
 7 6 14 4 1 1
 7 6 15 1 1 1
 7 6 15 2 1 1
 7 6 15 3 1 1
 7 6 15 4 1 1
 7 6 16 1 2 1
 7 6 16 2 1 1
 7 6 16 3 1 1
 7 6 16 4 1 1
 7 6 17 1 2 1
 7 6 17 2 1 1
 7 6 17 3 1 1
 7 6 17 4 2 1
 7 6 18 1 1 1
 7 6 18 2 1 1
 7 6 18 3 2 1
 7 6 18 4 1 1
 7 6 19 1 1 1
 7 6 19 2 1 1
 7 6 19 3 2 1
 7 6 19 4 1 1
 7 6 20 1 1 1
 7 6 20 2 2 1
 7 6 20 3 1 1
 7 6 20 4 2 1
 7 6 21 1 1 1
 7 6 21 2 2 1
 7 6 21 3 1 1
 7 6 21 4 1 1
 7 6 22 1 1 1
 7 6 22 2 1 1
 7 6 22 3 1 1
 7 6 22 4 2 1
 7 6 23 1 1 1
 7 6 23 2 1 1
 7 6 23 3 2 1
 7 6 23 4 2 1
 7 6 24 1 1 1
 7 6 24 2 1 1
 7 6 24 3 1 1
 7 6 24 4 1 1
 7 6 25 1 2 1
 7 6 25 2 2 1
 7 6 25 3 1 1
 7 6 25 4 1 1
 7 6 26 1 2 1
 7 6 26 2 1 1
 7 6 26 3 1 1
 7 6 26 4 1 1
 7 6 27 1 1 1
 7 6 27 2 2 1
 7 6 27 3 1 1
 7 6 27 4 1 1
 7 6 28 1 1 1
 7 6 28 2 1 1
 7 6 28 3 1 1
 7 6 28 4 1 1
 7 6 29 1 2 1
 7 6 29 2 2 1
 7 6 29 3 2 1
 7 6 29 4 1 1
 7 6 30 1 1 1
 7 6 30 2 2 1
 7 6 30 3 2 1
 7 6 30 4 1 1
 7 6 31 1 2 1
 7 6 31 2 2 1
 7 6 31 3 1 1
 7 6 31 4 2 1
 7 6 32 1 2 1
 7 6 32 2 1 1
 7 6 32 3 2 1
 7 6 32 4 2 1
 7 7 1 1 1 1
 7 7 1 2 2 1
 7 7 1 3 2 1
 7 7 1 4 1 1
 7 7 2 1 1 1
 7 7 2 2 1 1
 7 7 2 3 1 1
 7 7 2 4 2 1
 7 7 3 1 2 1
 7 7 3 2 1 1
 7 7 3 3 1 1
 7 7 3 4 2 1
 7 7 4 1 1 1
 7 7 4 2 1 1
 7 7 4 3 2 1
 7 7 4 4 2 1
 7 7 5 1 1 1
 7 7 5 2 1 1
 7 7 5 3 2 1
 7 7 5 4 1 1
 7 7 6 1 2 1
 7 7 6 2 1 1
 7 7 6 3 1 1
 7 7 6 4 1 1
 7 7 7 1 1 1
 7 7 7 2 1 1
 7 7 7 3 1 1
 7 7 7 4 1 1
 7 7 8 1 1 1
 7 7 8 2 1 1
 7 7 8 3 1 1
 7 7 8 4 1 1
 7 7 9 1 1 1
 7 7 9 2 1 1
 7 7 9 3 1 1
 7 7 9 4 1 1
 7 7 10 1 1 1
 7 7 10 2 1 1
 7 7 10 3 1 1
 7 7 10 4 2 1
 7 7 11 1 1 1
 7 7 11 2 2 1
 7 7 11 3 1 1
 7 7 11 4 2 1
 7 7 12 1 1 1
 7 7 12 2 2 1
 7 7 12 3 2 1
 7 7 12 4 1 1
 7 7 13 1 1 1
 7 7 13 2 1 1
 7 7 13 3 2 1
 7 7 13 4 1 1
 7 7 14 1 1 1
 7 7 14 2 1 1
 7 7 14 3 1 1
 7 7 14 4 1 1
 7 7 15 1 1 1
 7 7 15 2 1 1
 7 7 15 3 1 1
 7 7 15 4 1 1
 7 7 16 1 2 1
 7 7 16 2 2 1
 7 7 16 3 1 1
 7 7 16 4 1 1
 7 7 17 1 1 1
 7 7 17 2 1 1
 7 7 17 3 1 1
 7 7 17 4 1 1
 7 7 18 1 1 1
 7 7 18 2 1 1
 7 7 18 3 1 1
 7 7 18 4 1 1
 7 7 19 1 2 1
 7 7 19 2 2 1
 7 7 19 3 1 1
 7 7 19 4 1 1
 7 7 20 1 2 1
 7 7 20 2 1 1
 7 7 20 3 2 1
 7 7 20 4 1 1
 7 7 21 1 1 1
 7 7 21 2 2 1
 7 7 21 3 1 1
 7 7 21 4 1 1
 7 7 22 1 1 1
 7 7 22 2 1 1
 7 7 22 3 1 1
 7 7 22 4 1 1
 7 7 23 1 2 1
 7 7 23 2 1 1
 7 7 23 3 1 1
 7 7 23 4 1 1
 7 7 24 1 2 1
 7 7 24 2 2 1
 7 7 24 3 1 1
 7 7 24 4 1 1
 7 7 25 1 2 1
 7 7 25 2 2 1
 7 7 25 3 2 1
 7 7 25 4 2 1
 7 7 26 1 2 1
 7 7 26 2 1 1
 7 7 26 3 1 1
 7 7 26 4 1 1
 7 7 27 1 1 1
 7 7 27 2 1 1
 7 7 27 3 1 1
 7 7 27 4 1 1
 7 7 28 1 1 1
 7 7 28 2 1 1
 7 7 28 3 2 1
 7 7 28 4 1 1
 7 7 29 1 1 1
 7 7 29 2 1 1
 7 7 29 3 2 1
 7 7 29 4 1 1
 7 7 30 1 1 1
 7 7 30 2 1 1
 7 7 30 3 2 1
 7 7 30 4 2 1
 7 7 31 1 1 1
 7 7 31 2 1 1
 7 7 31 3 2 1
 7 7 31 4 2 1
 7 7 32 1 1 1
 7 7 32 2 1 1
 7 7 32 3 1 1
 7 7 32 4 2 1
 7 8 1 1 1 1
 7 8 1 2 2 1
 7 8 1 3 2 1
 7 8 1 4 2 1
 7 8 2 1 1 1
 7 8 2 2 1 1
 7 8 2 3 1 1
 7 8 2 4 1 1
 7 8 3 1 2 1
 7 8 3 2 1 1
 7 8 3 3 2 1
 7 8 3 4 2 1
 7 8 4 1 1 1
 7 8 4 2 1 1
 7 8 4 3 1 1
 7 8 4 4 2 1
 7 8 5 1 1 1
 7 8 5 2 1 1
 7 8 5 3 1 1
 7 8 5 4 1 1
 7 8 6 1 2 1
 7 8 6 2 1 1
 7 8 6 3 1 1
 7 8 6 4 2 1
 7 8 7 1 1 1
 7 8 7 2 1 1
 7 8 7 3 1 1
 7 8 7 4 1 1
 7 8 8 1 1 1
 7 8 8 2 1 1
 7 8 8 3 1 1
 7 8 8 4 1 1
 7 8 9 1 1 1
 7 8 9 2 2 1
 7 8 9 3 1 1
 7 8 9 4 1 1
 7 8 10 1 2 1
 7 8 10 2 2 1
 7 8 10 3 1 1
 7 8 10 4 1 1
 7 8 11 1 1 1
 7 8 11 2 1 1
 7 8 11 3 2 1
 7 8 11 4 1 1
 7 8 12 1 1 1
 7 8 12 2 1 1
 7 8 12 3 1 1
 7 8 12 4 1 1
 7 8 13 1 1 1
 7 8 13 2 2 1
 7 8 13 3 1 1
 7 8 13 4 1 1
 7 8 14 1 1 1
 7 8 14 2 1 1
 7 8 14 3 2 1
 7 8 14 4 1 1
 7 8 15 1 1 1
 7 8 15 2 1 1
 7 8 15 3 1 1
 7 8 15 4 1 1
 7 8 16 1 2 1
 7 8 16 2 1 1
 7 8 16 3 1 1
 7 8 16 4 2 1
 7 8 17 1 1 1
 7 8 17 2 2 1
 7 8 17 3 1 1
 7 8 17 4 1 1
 7 8 18 1 1 1
 7 8 18 2 1 1
 7 8 18 3 1 1
 7 8 18 4 2 1
 7 8 19 1 2 1
 7 8 19 2 2 1
 7 8 19 3 1 1
 7 8 19 4 2 1
 7 8 20 1 2 1
 7 8 20 2 2 1
 7 8 20 3 2 1
 7 8 20 4 1 1
 7 8 21 1 1 1
 7 8 21 2 2 1
 7 8 21 3 1 1
 7 8 21 4 1 1
 7 8 22 1 2 1
 7 8 22 2 1 1
 7 8 22 3 1 1
 7 8 22 4 1 1
 7 8 23 1 1 1
 7 8 23 2 1 1
 7 8 23 3 1 1
 7 8 23 4 1 1
 7 8 24 1 1 1
 7 8 24 2 2 1
 7 8 24 3 2 1
 7 8 24 4 1 1
 7 8 25 1 1 1
 7 8 25 2 1 1
 7 8 25 3 1 1
 7 8 25 4 2 1
 7 8 26 1 2 1
 7 8 26 2 2 1
 7 8 26 3 1 1
 7 8 26 4 1 1
 7 8 27 1 1 1
 7 8 27 2 1 1
 7 8 27 3 1 1
 7 8 27 4 1 1
 7 8 28 1 1 1
 7 8 28 2 2 1
 7 8 28 3 2 1
 7 8 28 4 1 1
 7 8 29 1 1 1
 7 8 29 2 1 1
 7 8 29 3 2 1
 7 8 29 4 1 1
 7 8 30 1 1 1
 7 8 30 2 1 1
 7 8 30 3 1 1
 7 8 30 4 1 1
 7 8 31 1 1 1
 7 8 31 2 2 1
 7 8 31 3 1 1
 7 8 31 4 2 1
 7 8 32 1 1 1
 7 8 32 2 2 1
 7 8 32 3 1 1
 7 8 32 4 1 1
 7 9 1 1 1 1
 7 9 1 2 1 1
 7 9 1 3 1 1
 7 9 1 4 1 1
 7 9 2 1 1 1
 7 9 2 2 1 1
 7 9 2 3 2 1
 7 9 2 4 1 1
 7 9 3 1 2 1
 7 9 3 2 1 1
 7 9 3 3 2 1
 7 9 3 4 1 1
 7 9 4 1 1 1
 7 9 4 2 1 1
 7 9 4 3 2 1
 7 9 4 4 1 1
 7 9 5 1 1 1
 7 9 5 2 2 1
 7 9 5 3 1 1
 7 9 5 4 1 1
 7 9 6 1 2 1
 7 9 6 2 2 1
 7 9 6 3 1 1
 7 9 6 4 1 1
 7 9 7 1 1 1
 7 9 7 2 1 1
 7 9 7 3 2 1
 7 9 7 4 2 1
 7 9 8 1 1 1
 7 9 8 2 2 1
 7 9 8 3 1 1
 7 9 8 4 1 1
 7 9 9 1 1 1
 7 9 9 2 1 1
 7 9 9 3 2 1
 7 9 9 4 1 1
 7 9 10 1 1 1
 7 9 10 2 2 1
 7 9 10 3 1 1
 7 9 10 4 1 1
 7 9 11 1 2 1
 7 9 11 2 2 1
 7 9 11 3 2 1
 7 9 11 4 1 1
 7 9 12 1 1 1
 7 9 12 2 1 1
 7 9 12 3 1 1
 7 9 12 4 1 1
 7 9 13 1 2 1
 7 9 13 2 1 1
 7 9 13 3 1 1
 7 9 13 4 1 1
 7 9 14 1 1 1
 7 9 14 2 1 1
 7 9 14 3 1 1
 7 9 14 4 1 1
 7 9 15 1 2 1
 7 9 15 2 1 1
 7 9 15 3 1 1
 7 9 15 4 2 1
 7 9 16 1 1 1
 7 9 16 2 2 1
 7 9 16 3 1 1
 7 9 16 4 1 1
 7 9 17 1 1 1
 7 9 17 2 2 1
 7 9 17 3 1 1
 7 9 17 4 1 1
 7 9 18 1 1 1
 7 9 18 2 2 1
 7 9 18 3 1 1
 7 9 18 4 1 1
 7 9 19 1 2 1
 7 9 19 2 1 1
 7 9 19 3 1 1
 7 9 19 4 2 1
 7 9 20 1 2 1
 7 9 20 2 2 1
 7 9 20 3 2 1
 7 9 20 4 2 1
 7 9 21 1 1 1
 7 9 21 2 1 1
 7 9 21 3 1 1
 7 9 21 4 2 1
 7 9 22 1 1 1
 7 9 22 2 1 1
 7 9 22 3 1 1
 7 9 22 4 1 1
 7 9 23 1 2 1
 7 9 23 2 2 1
 7 9 23 3 2 1
 7 9 23 4 2 1
 7 9 24 1 1 1
 7 9 24 2 1 1
 7 9 24 3 1 1
 7 9 24 4 1 1
 7 9 25 1 1 1
 7 9 25 2 1 1
 7 9 25 3 2 1
 7 9 25 4 1 1
 7 9 26 1 1 1
 7 9 26 2 1 1
 7 9 26 3 1 1
 7 9 26 4 2 1
 7 9 27 1 1 1
 7 9 27 2 1 1
 7 9 27 3 1 1
 7 9 27 4 1 1
 7 9 28 1 1 1
 7 9 28 2 1 1
 7 9 28 3 2 1
 7 9 28 4 2 1
 7 9 29 1 1 1
 7 9 29 2 2 1
 7 9 29 3 2 1
 7 9 29 4 1 1
 7 9 30 1 1 1
 7 9 30 2 2 1
 7 9 30 3 1 1
 7 9 30 4 1 1
 7 9 31 1 1 1
 7 9 31 2 2 1
 7 9 31 3 1 1
 7 9 31 4 1 1
 7 9 32 1 2 1
 7 9 32 2 1 1
 7 9 32 3 2 1
 7 9 32 4 1 1
 7 10 1 1 2 1
 7 10 1 2 2 1
 7 10 1 3 1 1
 7 10 1 4 1 1
 7 10 2 1 1 1
 7 10 2 2 1 1
 7 10 2 3 1 1
 7 10 2 4 1 1
 7 10 3 1 1 1
 7 10 3 2 1 1
 7 10 3 3 2 1
 7 10 3 4 2 1
 7 10 4 1 1 1
 7 10 4 2 2 1
 7 10 4 3 1 1
 7 10 4 4 2 1
 7 10 5 1 2 1
 7 10 5 2 2 1
 7 10 5 3 2 1
 7 10 5 4 1 1
 7 10 6 1 2 1
 7 10 6 2 1 1
 7 10 6 3 1 1
 7 10 6 4 1 1
 7 10 7 1 1 1
 7 10 7 2 1 1
 7 10 7 3 2 1
 7 10 7 4 2 1
 7 10 8 1 2 1
 7 10 8 2 1 1
 7 10 8 3 2 1
 7 10 8 4 1 1
 7 10 9 1 1 1
 7 10 9 2 2 1
 7 10 9 3 2 1
 7 10 9 4 1 1
 7 10 10 1 1 1
 7 10 10 2 1 1
 7 10 10 3 1 1
 7 10 10 4 1 1
 7 10 11 1 2 1
 7 10 11 2 1 1
 7 10 11 3 1 1
 7 10 11 4 2 1
 7 10 12 1 1 1
 7 10 12 2 1 1
 7 10 12 3 2 1
 7 10 12 4 1 1
 7 10 13 1 1 1
 7 10 13 2 1 1
 7 10 13 3 1 1
 7 10 13 4 1 1
 7 10 14 1 2 1
 7 10 14 2 1 1
 7 10 14 3 2 1
 7 10 14 4 2 1
 7 10 15 1 1 1
 7 10 15 2 2 1
 7 10 15 3 2 1
 7 10 15 4 1 1
 7 10 16 1 2 1
 7 10 16 2 2 1
 7 10 16 3 2 1
 7 10 16 4 1 1
 7 10 17 1 1 1
 7 10 17 2 1 1
 7 10 17 3 1 1
 7 10 17 4 2 1
 7 10 18 1 1 1
 7 10 18 2 2 1
 7 10 18 3 2 1
 7 10 18 4 2 1
 7 10 19 1 2 1
 7 10 19 2 1 1
 7 10 19 3 1 1
 7 10 19 4 1 1
 7 10 20 1 1 1
 7 10 20 2 1 1
 7 10 20 3 1 1
 7 10 20 4 2 1
 7 10 21 1 1 1
 7 10 21 2 1 1
 7 10 21 3 1 1
 7 10 21 4 2 1
 7 10 22 1 2 1
 7 10 22 2 1 1
 7 10 22 3 1 1
 7 10 22 4 2 1
 7 10 23 1 1 1
 7 10 23 2 1 1
 7 10 23 3 1 1
 7 10 23 4 2 1
 7 10 24 1 1 1
 7 10 24 2 1 1
 7 10 24 3 2 1
 7 10 24 4 2 1
 7 10 25 1 1 1
 7 10 25 2 1 1
 7 10 25 3 1 1
 7 10 25 4 1 1
 7 10 26 1 1 1
 7 10 26 2 1 1
 7 10 26 3 2 1
 7 10 26 4 1 1
 7 10 27 1 1 1
 7 10 27 2 1 1
 7 10 27 3 1 1
 7 10 27 4 2 1
 7 10 28 1 1 1
 7 10 28 2 1 1
 7 10 28 3 1 1
 7 10 28 4 1 1
 7 10 29 1 1 1
 7 10 29 2 1 1
 7 10 29 3 1 1
 7 10 29 4 2 1
 7 10 30 1 1 1
 7 10 30 2 2 1
 7 10 30 3 1 1
 7 10 30 4 1 1
 7 10 31 1 2 1
 7 10 31 2 2 1
 7 10 31 3 1 1
 7 10 31 4 1 1
 7 10 32 1 1 1
 7 10 32 2 1 1
 7 10 32 3 1 1
 7 10 32 4 1 1
 7 11 1 1 1 1
 7 11 1 2 1 1
 7 11 1 3 2 1
 7 11 1 4 2 1
 7 11 2 1 1 1
 7 11 2 2 2 1
 7 11 2 3 1 1
 7 11 2 4 2 1
 7 11 3 1 1 1
 7 11 3 2 1 1
 7 11 3 3 1 1
 7 11 3 4 2 1
 7 11 4 1 1 1
 7 11 4 2 1 1
 7 11 4 3 2 1
 7 11 4 4 1 1
 7 11 5 1 2 1
 7 11 5 2 1 1
 7 11 5 3 1 1
 7 11 5 4 1 1
 7 11 6 1 1 1
 7 11 6 2 1 1
 7 11 6 3 1 1
 7 11 6 4 2 1
 7 11 7 1 2 1
 7 11 7 2 2 1
 7 11 7 3 2 1
 7 11 7 4 1 1
 7 11 8 1 1 1
 7 11 8 2 2 1
 7 11 8 3 1 1
 7 11 8 4 1 1
 7 11 9 1 2 1
 7 11 9 2 1 1
 7 11 9 3 2 1
 7 11 9 4 1 1
 7 11 10 1 1 1
 7 11 10 2 1 1
 7 11 10 3 1 1
 7 11 10 4 1 1
 7 11 11 1 1 1
 7 11 11 2 1 1
 7 11 11 3 2 1
 7 11 11 4 1 1
 7 11 12 1 1 1
 7 11 12 2 1 1
 7 11 12 3 1 1
 7 11 12 4 1 1
 7 11 13 1 1 1
 7 11 13 2 1 1
 7 11 13 3 1 1
 7 11 13 4 1 1
 7 11 14 1 1 1
 7 11 14 2 1 1
 7 11 14 3 1 1
 7 11 14 4 1 1
 7 11 15 1 1 1
 7 11 15 2 1 1
 7 11 15 3 1 1
 7 11 15 4 1 1
 7 11 16 1 1 1
 7 11 16 2 1 1
 7 11 16 3 1 1
 7 11 16 4 1 1
 7 11 17 1 1 1
 7 11 17 2 1 1
 7 11 17 3 1 1
 7 11 17 4 1 1
 7 11 18 1 2 1
 7 11 18 2 1 1
 7 11 18 3 1 1
 7 11 18 4 2 1
 7 11 19 1 2 1
 7 11 19 2 1 1
 7 11 19 3 1 1
 7 11 19 4 2 1
 7 11 20 1 1 1
 7 11 20 2 2 1
 7 11 20 3 1 1
 7 11 20 4 2 1
 7 11 21 1 1 1
 7 11 21 2 1 1
 7 11 21 3 1 1
 7 11 21 4 1 1
 7 11 22 1 2 1
 7 11 22 2 1 1
 7 11 22 3 2 1
 7 11 22 4 1 1
 7 11 23 1 1 1
 7 11 23 2 2 1
 7 11 23 3 1 1
 7 11 23 4 1 1
 7 11 24 1 1 1
 7 11 24 2 1 1
 7 11 24 3 2 1
 7 11 24 4 1 1
 7 11 25 1 2 1
 7 11 25 2 1 1
 7 11 25 3 1 1
 7 11 25 4 2 1
 7 11 26 1 2 1
 7 11 26 2 1 1
 7 11 26 3 1 1
 7 11 26 4 1 1
 7 11 27 1 1 1
 7 11 27 2 1 1
 7 11 27 3 1 1
 7 11 27 4 2 1
 7 11 28 1 1 1
 7 11 28 2 2 1
 7 11 28 3 1 1
 7 11 28 4 1 1
 7 11 29 1 2 1
 7 11 29 2 1 1
 7 11 29 3 1 1
 7 11 29 4 1 1
 7 11 30 1 1 1
 7 11 30 2 1 1
 7 11 30 3 2 1
 7 11 30 4 1 1
 7 11 31 1 1 1
 7 11 31 2 1 1
 7 11 31 3 1 1
 7 11 31 4 1 1
 7 11 32 1 1 1
 7 11 32 2 1 1
 7 11 32 3 2 1
 7 11 32 4 1 1
 7 12 1 1 1 1
 7 12 1 2 2 1
 7 12 1 3 1 1
 7 12 1 4 1 1
 7 12 2 1 2 1
 7 12 2 2 1 1
 7 12 2 3 2 1
 7 12 2 4 2 1
 7 12 3 1 2 1
 7 12 3 2 1 1
 7 12 3 3 1 1
 7 12 3 4 2 1
 7 12 4 1 1 1
 7 12 4 2 2 1
 7 12 4 3 1 1
 7 12 4 4 1 1
 7 12 5 1 1 1
 7 12 5 2 2 1
 7 12 5 3 1 1
 7 12 5 4 1 1
 7 12 6 1 1 1
 7 12 6 2 1 1
 7 12 6 3 1 1
 7 12 6 4 2 1
 7 12 7 1 2 1
 7 12 7 2 1 1
 7 12 7 3 1 1
 7 12 7 4 1 1
 7 12 8 1 1 1
 7 12 8 2 1 1
 7 12 8 3 1 1
 7 12 8 4 1 1
 7 12 9 1 2 1
 7 12 9 2 1 1
 7 12 9 3 1 1
 7 12 9 4 1 1
 7 12 10 1 2 1
 7 12 10 2 1 1
 7 12 10 3 2 1
 7 12 10 4 1 1
 7 12 11 1 1 1
 7 12 11 2 1 1
 7 12 11 3 1 1
 7 12 11 4 1 1
 7 12 12 1 1 1
 7 12 12 2 1 1
 7 12 12 3 1 1
 7 12 12 4 2 1
 7 12 13 1 1 1
 7 12 13 2 1 1
 7 12 13 3 2 1
 7 12 13 4 2 1
 7 12 14 1 1 1
 7 12 14 2 1 1
 7 12 14 3 1 1
 7 12 14 4 2 1
 7 12 15 1 1 1
 7 12 15 2 1 1
 7 12 15 3 2 1
 7 12 15 4 1 1
 7 12 16 1 1 1
 7 12 16 2 2 1
 7 12 16 3 2 1
 7 12 16 4 1 1
 7 12 17 1 1 1
 7 12 17 2 1 1
 7 12 17 3 1 1
 7 12 17 4 2 1
 7 12 18 1 2 1
 7 12 18 2 2 1
 7 12 18 3 1 1
 7 12 18 4 1 1
 7 12 19 1 1 1
 7 12 19 2 2 1
 7 12 19 3 1 1
 7 12 19 4 1 1
 7 12 20 1 1 1
 7 12 20 2 1 1
 7 12 20 3 2 1
 7 12 20 4 1 1
 7 12 21 1 1 1
 7 12 21 2 1 1
 7 12 21 3 1 1
 7 12 21 4 1 1
 7 12 22 1 1 1
 7 12 22 2 1 1
 7 12 22 3 1 1
 7 12 22 4 1 1
 7 12 23 1 2 1
 7 12 23 2 2 1
 7 12 23 3 1 1
 7 12 23 4 2 1
 7 12 24 1 2 1
 7 12 24 2 2 1
 7 12 24 3 1 1
 7 12 24 4 2 1
 7 12 25 1 1 1
 7 12 25 2 1 1
 7 12 25 3 2 1
 7 12 25 4 1 1
 7 12 26 1 1 1
 7 12 26 2 1 1
 7 12 26 3 1 1
 7 12 26 4 2 1
 7 12 27 1 1 1
 7 12 27 2 2 1
 7 12 27 3 1 1
 7 12 27 4 1 1
 7 12 28 1 2 1
 7 12 28 2 1 1
 7 12 28 3 1 1
 7 12 28 4 1 1
 7 12 29 1 1 1
 7 12 29 2 1 1
 7 12 29 3 1 1
 7 12 29 4 1 1
 7 12 30 1 1 1
 7 12 30 2 1 1
 7 12 30 3 2 1
 7 12 30 4 2 1
 7 12 31 1 1 1
 7 12 31 2 2 1
 7 12 31 3 1 1
 7 12 31 4 2 1
 7 12 32 1 1 1
 7 12 32 2 2 1
 7 12 32 3 1 1
 7 12 32 4 2 1
 7 13 1 1 1 1
 7 13 1 2 2 1
 7 13 1 3 1 1
 7 13 1 4 2 1
 7 13 2 1 2 1
 7 13 2 2 1 1
 7 13 2 3 1 1
 7 13 2 4 1 1
 7 13 3 1 1 1
 7 13 3 2 1 1
 7 13 3 3 1 1
 7 13 3 4 1 1
 7 13 4 1 1 1
 7 13 4 2 1 1
 7 13 4 3 1 1
 7 13 4 4 2 1
 7 13 5 1 1 1
 7 13 5 2 1 1
 7 13 5 3 1 1
 7 13 5 4 1 1
 7 13 6 1 1 1
 7 13 6 2 1 1
 7 13 6 3 1 1
 7 13 6 4 2 1
 7 13 7 1 2 1
 7 13 7 2 1 1
 7 13 7 3 1 1
 7 13 7 4 1 1
 7 13 8 1 2 1
 7 13 8 2 2 1
 7 13 8 3 1 1
 7 13 8 4 1 1
 7 13 9 1 2 1
 7 13 9 2 1 1
 7 13 9 3 1 1
 7 13 9 4 1 1
 7 13 10 1 1 1
 7 13 10 2 1 1
 7 13 10 3 1 1
 7 13 10 4 1 1
 7 13 11 1 1 1
 7 13 11 2 1 1
 7 13 11 3 1 1
 7 13 11 4 1 1
 7 13 12 1 1 1
 7 13 12 2 2 1
 7 13 12 3 1 1
 7 13 12 4 2 1
 7 13 13 1 1 1
 7 13 13 2 1 1
 7 13 13 3 1 1
 7 13 13 4 1 1
 7 13 14 1 2 1
 7 13 14 2 2 1
 7 13 14 3 2 1
 7 13 14 4 2 1
 7 13 15 1 1 1
 7 13 15 2 1 1
 7 13 15 3 2 1
 7 13 15 4 2 1
 7 13 16 1 1 1
 7 13 16 2 1 1
 7 13 16 3 1 1
 7 13 16 4 1 1
 7 13 17 1 1 1
 7 13 17 2 2 1
 7 13 17 3 1 1
 7 13 17 4 1 1
 7 13 18 1 1 1
 7 13 18 2 1 1
 7 13 18 3 1 1
 7 13 18 4 1 1
 7 13 19 1 2 1
 7 13 19 2 2 1
 7 13 19 3 1 1
 7 13 19 4 1 1
 7 13 20 1 1 1
 7 13 20 2 2 1
 7 13 20 3 2 1
 7 13 20 4 1 1
 7 13 21 1 1 1
 7 13 21 2 2 1
 7 13 21 3 1 1
 7 13 21 4 1 1
 7 13 22 1 1 1
 7 13 22 2 1 1
 7 13 22 3 1 1
 7 13 22 4 1 1
 7 13 23 1 2 1
 7 13 23 2 2 1
 7 13 23 3 2 1
 7 13 23 4 2 1
 7 13 24 1 1 1
 7 13 24 2 1 1
 7 13 24 3 2 1
 7 13 24 4 1 1
 7 13 25 1 1 1
 7 13 25 2 2 1
 7 13 25 3 1 1
 7 13 25 4 1 1
 7 13 26 1 1 1
 7 13 26 2 1 1
 7 13 26 3 1 1
 7 13 26 4 2 1
 7 13 27 1 2 1
 7 13 27 2 1 1
 7 13 27 3 1 1
 7 13 27 4 1 1
 7 13 28 1 1 1
 7 13 28 2 1 1
 7 13 28 3 1 1
 7 13 28 4 2 1
 7 13 29 1 1 1
 7 13 29 2 1 1
 7 13 29 3 1 1
 7 13 29 4 1 1
 7 13 30 1 2 1
 7 13 30 2 1 1
 7 13 30 3 1 1
 7 13 30 4 2 1
 7 13 31 1 1 1
 7 13 31 2 1 1
 7 13 31 3 1 1
 7 13 31 4 1 1
 7 13 32 1 1 1
 7 13 32 2 1 1
 7 13 32 3 1 1
 7 13 32 4 1 1
 7 14 1 1 2 1
 7 14 1 2 1 1
 7 14 1 3 1 1
 7 14 1 4 1 1
 7 14 2 1 1 1
 7 14 2 2 1 1
 7 14 2 3 1 1
 7 14 2 4 1 1
 7 14 3 1 1 1
 7 14 3 2 1 1
 7 14 3 3 1 1
 7 14 3 4 1 1
 7 14 4 1 1 1
 7 14 4 2 2 1
 7 14 4 3 2 1
 7 14 4 4 1 1
 7 14 5 1 1 1
 7 14 5 2 1 1
 7 14 5 3 1 1
 7 14 5 4 2 1
 7 14 6 1 1 1
 7 14 6 2 2 1
 7 14 6 3 2 1
 7 14 6 4 1 1
 7 14 7 1 1 1
 7 14 7 2 1 1
 7 14 7 3 1 1
 7 14 7 4 1 1
 7 14 8 1 2 1
 7 14 8 2 1 1
 7 14 8 3 1 1
 7 14 8 4 2 1
 7 14 9 1 1 1
 7 14 9 2 2 1
 7 14 9 3 1 1
 7 14 9 4 1 1
 7 14 10 1 2 1
 7 14 10 2 1 1
 7 14 10 3 2 1
 7 14 10 4 1 1
 7 14 11 1 1 1
 7 14 11 2 2 1
 7 14 11 3 1 1
 7 14 11 4 2 1
 7 14 12 1 1 1
 7 14 12 2 1 1
 7 14 12 3 1 1
 7 14 12 4 1 1
 7 14 13 1 1 1
 7 14 13 2 1 1
 7 14 13 3 1 1
 7 14 13 4 1 1
 7 14 14 1 1 1
 7 14 14 2 1 1
 7 14 14 3 1 1
 7 14 14 4 1 1
 7 14 15 1 1 1
 7 14 15 2 1 1
 7 14 15 3 2 1
 7 14 15 4 1 1
 7 14 16 1 1 1
 7 14 16 2 2 1
 7 14 16 3 1 1
 7 14 16 4 2 1
 7 14 17 1 2 1
 7 14 17 2 1 1
 7 14 17 3 1 1
 7 14 17 4 1 1
 7 14 18 1 1 1
 7 14 18 2 1 1
 7 14 18 3 1 1
 7 14 18 4 2 1
 7 14 19 1 2 1
 7 14 19 2 1 1
 7 14 19 3 1 1
 7 14 19 4 2 1
 7 14 20 1 1 1
 7 14 20 2 1 1
 7 14 20 3 2 1
 7 14 20 4 1 1
 7 14 21 1 2 1
 7 14 21 2 1 1
 7 14 21 3 2 1
 7 14 21 4 2 1
 7 14 22 1 1 1
 7 14 22 2 1 1
 7 14 22 3 1 1
 7 14 22 4 1 1
 7 14 23 1 2 1
 7 14 23 2 2 1
 7 14 23 3 1 1
 7 14 23 4 1 1
 7 14 24 1 2 1
 7 14 24 2 1 1
 7 14 24 3 1 1
 7 14 24 4 1 1
 7 14 25 1 1 1
 7 14 25 2 1 1
 7 14 25 3 1 1
 7 14 25 4 1 1
 7 14 26 1 1 1
 7 14 26 2 1 1
 7 14 26 3 1 1
 7 14 26 4 1 1
 7 14 27 1 1 1
 7 14 27 2 2 1
 7 14 27 3 1 1
 7 14 27 4 2 1
 7 14 28 1 2 1
 7 14 28 2 1 1
 7 14 28 3 2 1
 7 14 28 4 2 1
 7 14 29 1 2 1
 7 14 29 2 1 1
 7 14 29 3 2 1
 7 14 29 4 1 1
 7 14 30 1 1 1
 7 14 30 2 1 1
 7 14 30 3 1 1
 7 14 30 4 2 1
 7 14 31 1 2 1
 7 14 31 2 2 1
 7 14 31 3 2 1
 7 14 31 4 1 1
 7 14 32 1 2 1
 7 14 32 2 2 1
 7 14 32 3 2 1
 7 14 32 4 1 1
 7 15 1 1 1 1
 7 15 1 2 1 1
 7 15 1 3 2 1
 7 15 1 4 2 1
 7 15 2 1 1 1
 7 15 2 2 1 1
 7 15 2 3 1 1
 7 15 2 4 1 1
 7 15 3 1 2 1
 7 15 3 2 1 1
 7 15 3 3 1 1
 7 15 3 4 1 1
 7 15 4 1 2 1
 7 15 4 2 2 1
 7 15 4 3 1 1
 7 15 4 4 2 1
 7 15 5 1 1 1
 7 15 5 2 1 1
 7 15 5 3 1 1
 7 15 5 4 2 1
 7 15 6 1 2 1
 7 15 6 2 1 1
 7 15 6 3 1 1
 7 15 6 4 2 1
 7 15 7 1 2 1
 7 15 7 2 1 1
 7 15 7 3 1 1
 7 15 7 4 2 1
 7 15 8 1 1 1
 7 15 8 2 1 1
 7 15 8 3 1 1
 7 15 8 4 2 1
 7 15 9 1 1 1
 7 15 9 2 2 1
 7 15 9 3 1 1
 7 15 9 4 2 1
 7 15 10 1 1 1
 7 15 10 2 1 1
 7 15 10 3 2 1
 7 15 10 4 1 1
 7 15 11 1 1 1
 7 15 11 2 1 1
 7 15 11 3 1 1
 7 15 11 4 1 1
 7 15 12 1 2 1
 7 15 12 2 1 1
 7 15 12 3 1 1
 7 15 12 4 1 1
 7 15 13 1 1 1
 7 15 13 2 1 1
 7 15 13 3 1 1
 7 15 13 4 1 1
 7 15 14 1 1 1
 7 15 14 2 1 1
 7 15 14 3 1 1
 7 15 14 4 2 1
 7 15 15 1 1 1
 7 15 15 2 1 1
 7 15 15 3 1 1
 7 15 15 4 2 1
 7 15 16 1 1 1
 7 15 16 2 1 1
 7 15 16 3 1 1
 7 15 16 4 1 1
 7 15 17 1 2 1
 7 15 17 2 1 1
 7 15 17 3 1 1
 7 15 17 4 1 1
 7 15 18 1 2 1
 7 15 18 2 1 1
 7 15 18 3 2 1
 7 15 18 4 1 1
 7 15 19 1 1 1
 7 15 19 2 1 1
 7 15 19 3 2 1
 7 15 19 4 2 1
 7 15 20 1 2 1
 7 15 20 2 2 1
 7 15 20 3 1 1
 7 15 20 4 1 1
 7 15 21 1 1 1
 7 15 21 2 2 1
 7 15 21 3 1 1
 7 15 21 4 2 1
 7 15 22 1 2 1
 7 15 22 2 2 1
 7 15 22 3 2 1
 7 15 22 4 1 1
 7 15 23 1 2 1
 7 15 23 2 1 1
 7 15 23 3 2 1
 7 15 23 4 1 1
 7 15 24 1 1 1
 7 15 24 2 1 1
 7 15 24 3 1 1
 7 15 24 4 2 1
 7 15 25 1 1 1
 7 15 25 2 1 1
 7 15 25 3 1 1
 7 15 25 4 1 1
 7 15 26 1 2 1
 7 15 26 2 1 1
 7 15 26 3 1 1
 7 15 26 4 2 1
 7 15 27 1 1 1
 7 15 27 2 2 1
 7 15 27 3 1 1
 7 15 27 4 1 1
 7 15 28 1 1 1
 7 15 28 2 1 1
 7 15 28 3 2 1
 7 15 28 4 1 1
 7 15 29 1 1 1
 7 15 29 2 1 1
 7 15 29 3 2 1
 7 15 29 4 1 1
 7 15 30 1 1 1
 7 15 30 2 2 1
 7 15 30 3 2 1
 7 15 30 4 1 1
 7 15 31 1 1 1
 7 15 31 2 2 1
 7 15 31 3 2 1
 7 15 31 4 1 1
 7 15 32 1 1 1
 7 15 32 2 2 1
 7 15 32 3 1 1
 7 15 32 4 1 1
 7 16 1 1 1 1
 7 16 1 2 1 1
 7 16 1 3 1 1
 7 16 1 4 2 1
 7 16 2 1 1 1
 7 16 2 2 2 1
 7 16 2 3 2 1
 7 16 2 4 1 1
 7 16 3 1 1 1
 7 16 3 2 2 1
 7 16 3 3 1 1
 7 16 3 4 1 1
 7 16 4 1 1 1
 7 16 4 2 1 1
 7 16 4 3 1 1
 7 16 4 4 1 1
 7 16 5 1 1 1
 7 16 5 2 2 1
 7 16 5 3 2 1
 7 16 5 4 1 1
 7 16 6 1 2 1
 7 16 6 2 1 1
 7 16 6 3 1 1
 7 16 6 4 1 1
 7 16 7 1 2 1
 7 16 7 2 1 1
 7 16 7 3 1 1
 7 16 7 4 2 1
 7 16 8 1 1 1
 7 16 8 2 2 1
 7 16 8 3 2 1
 7 16 8 4 1 1
 7 16 9 1 2 1
 7 16 9 2 2 1
 7 16 9 3 1 1
 7 16 9 4 2 1
 7 16 10 1 1 1
 7 16 10 2 1 1
 7 16 10 3 1 1
 7 16 10 4 2 1
 7 16 11 1 1 1
 7 16 11 2 2 1
 7 16 11 3 1 1
 7 16 11 4 1 1
 7 16 12 1 1 1
 7 16 12 2 1 1
 7 16 12 3 1 1
 7 16 12 4 1 1
 7 16 13 1 2 1
 7 16 13 2 1 1
 7 16 13 3 2 1
 7 16 13 4 1 1
 7 16 14 1 1 1
 7 16 14 2 1 1
 7 16 14 3 1 1
 7 16 14 4 1 1
 7 16 15 1 1 1
 7 16 15 2 2 1
 7 16 15 3 2 1
 7 16 15 4 1 1
 7 16 16 1 2 1
 7 16 16 2 2 1
 7 16 16 3 2 1
 7 16 16 4 1 1
 7 16 17 1 1 1
 7 16 17 2 1 1
 7 16 17 3 2 1
 7 16 17 4 1 1
 7 16 18 1 1 1
 7 16 18 2 1 1
 7 16 18 3 1 1
 7 16 18 4 1 1
 7 16 19 1 2 1
 7 16 19 2 1 1
 7 16 19 3 1 1
 7 16 19 4 1 1
 7 16 20 1 2 1
 7 16 20 2 1 1
 7 16 20 3 1 1
 7 16 20 4 1 1
 7 16 21 1 2 1
 7 16 21 2 1 1
 7 16 21 3 2 1
 7 16 21 4 2 1
 7 16 22 1 1 1
 7 16 22 2 1 1
 7 16 22 3 2 1
 7 16 22 4 1 1
 7 16 23 1 1 1
 7 16 23 2 1 1
 7 16 23 3 1 1
 7 16 23 4 2 1
 7 16 24 1 1 1
 7 16 24 2 2 1
 7 16 24 3 1 1
 7 16 24 4 1 1
 7 16 25 1 2 1
 7 16 25 2 2 1
 7 16 25 3 2 1
 7 16 25 4 2 1
 7 16 26 1 1 1
 7 16 26 2 2 1
 7 16 26 3 2 1
 7 16 26 4 1 1
 7 16 27 1 1 1
 7 16 27 2 1 1
 7 16 27 3 1 1
 7 16 27 4 1 1
 7 16 28 1 1 1
 7 16 28 2 2 1
 7 16 28 3 1 1
 7 16 28 4 2 1
 7 16 29 1 2 1
 7 16 29 2 1 1
 7 16 29 3 1 1
 7 16 29 4 1 1
 7 16 30 1 1 1
 7 16 30 2 2 1
 7 16 30 3 1 1
 7 16 30 4 1 1
 7 16 31 1 2 1
 7 16 31 2 1 1
 7 16 31 3 1 1
 7 16 31 4 1 1
 7 16 32 1 2 1
 7 16 32 2 1 1
 7 16 32 3 1 1
 7 16 32 4 2 1
 7 17 1 1 2 1
 7 17 1 2 2 1
 7 17 1 3 1 1
 7 17 1 4 1 1
 7 17 2 1 1 1
 7 17 2 2 1 1
 7 17 2 3 2 1
 7 17 2 4 2 1
 7 17 3 1 2 1
 7 17 3 2 2 1
 7 17 3 3 1 1
 7 17 3 4 1 1
 7 17 4 1 2 1
 7 17 4 2 1 1
 7 17 4 3 1 1
 7 17 4 4 1 1
 7 17 5 1 2 1
 7 17 5 2 2 1
 7 17 5 3 1 1
 7 17 5 4 2 1
 7 17 6 1 2 1
 7 17 6 2 1 1
 7 17 6 3 2 1
 7 17 6 4 2 1
 7 17 7 1 1 1
 7 17 7 2 1 1
 7 17 7 3 1 1
 7 17 7 4 1 1
 7 17 8 1 1 1
 7 17 8 2 2 1
 7 17 8 3 1 1
 7 17 8 4 2 1
 7 17 9 1 1 1
 7 17 9 2 1 1
 7 17 9 3 1 1
 7 17 9 4 1 1
 7 17 10 1 1 1
 7 17 10 2 1 1
 7 17 10 3 1 1
 7 17 10 4 1 1
 7 17 11 1 1 1
 7 17 11 2 1 1
 7 17 11 3 1 1
 7 17 11 4 2 1
 7 17 12 1 1 1
 7 17 12 2 1 1
 7 17 12 3 1 1
 7 17 12 4 2 1
 7 17 13 1 1 1
 7 17 13 2 1 1
 7 17 13 3 2 1
 7 17 13 4 1 1
 7 17 14 1 1 1
 7 17 14 2 1 1
 7 17 14 3 2 1
 7 17 14 4 1 1
 7 17 15 1 2 1
 7 17 15 2 1 1
 7 17 15 3 2 1
 7 17 15 4 1 1
 7 17 16 1 1 1
 7 17 16 2 1 1
 7 17 16 3 2 1
 7 17 16 4 1 1
 7 17 17 1 1 1
 7 17 17 2 1 1
 7 17 17 3 1 1
 7 17 17 4 1 1
 7 17 18 1 2 1
 7 17 18 2 1 1
 7 17 18 3 1 1
 7 17 18 4 1 1
 7 17 19 1 1 1
 7 17 19 2 1 1
 7 17 19 3 1 1
 7 17 19 4 1 1
 7 17 20 1 2 1
 7 17 20 2 2 1
 7 17 20 3 2 1
 7 17 20 4 1 1
 7 17 21 1 2 1
 7 17 21 2 1 1
 7 17 21 3 1 1
 7 17 21 4 1 1
 7 17 22 1 2 1
 7 17 22 2 1 1
 7 17 22 3 1 1
 7 17 22 4 1 1
 7 17 23 1 1 1
 7 17 23 2 1 1
 7 17 23 3 1 1
 7 17 23 4 1 1
 7 17 24 1 1 1
 7 17 24 2 1 1
 7 17 24 3 1 1
 7 17 24 4 1 1
 7 17 25 1 1 1
 7 17 25 2 2 1
 7 17 25 3 1 1
 7 17 25 4 1 1
 7 17 26 1 2 1
 7 17 26 2 1 1
 7 17 26 3 2 1
 7 17 26 4 2 1
 7 17 27 1 1 1
 7 17 27 2 2 1
 7 17 27 3 1 1
 7 17 27 4 1 1
 7 17 28 1 2 1
 7 17 28 2 1 1
 7 17 28 3 1 1
 7 17 28 4 1 1
 7 17 29 1 1 1
 7 17 29 2 1 1
 7 17 29 3 1 1
 7 17 29 4 2 1
 7 17 30 1 1 1
 7 17 30 2 1 1
 7 17 30 3 1 1
 7 17 30 4 1 1
 7 17 31 1 1 1
 7 17 31 2 1 1
 7 17 31 3 1 1
 7 17 31 4 1 1
 7 17 32 1 2 1
 7 17 32 2 1 1
 7 17 32 3 1 1
 7 17 32 4 1 1
 7 18 1 1 1 1
 7 18 1 2 1 1
 7 18 1 3 2 1
 7 18 1 4 2 1
 7 18 2 1 1 1
 7 18 2 2 2 1
 7 18 2 3 1 1
 7 18 2 4 1 1
 7 18 3 1 1 1
 7 18 3 2 2 1
 7 18 3 3 1 1
 7 18 3 4 1 1
 7 18 4 1 2 1
 7 18 4 2 2 1
 7 18 4 3 1 1
 7 18 4 4 1 1
 7 18 5 1 1 1
 7 18 5 2 1 1
 7 18 5 3 1 1
 7 18 5 4 1 1
 7 18 6 1 1 1
 7 18 6 2 2 1
 7 18 6 3 1 1
 7 18 6 4 2 1
 7 18 7 1 2 1
 7 18 7 2 1 1
 7 18 7 3 1 1
 7 18 7 4 1 1
 7 18 8 1 1 1
 7 18 8 2 1 1
 7 18 8 3 1 1
 7 18 8 4 1 1
 7 18 9 1 1 1
 7 18 9 2 1 1
 7 18 9 3 1 1
 7 18 9 4 2 1
 7 18 10 1 1 1
 7 18 10 2 1 1
 7 18 10 3 1 1
 7 18 10 4 2 1
 7 18 11 1 2 1
 7 18 11 2 1 1
 7 18 11 3 1 1
 7 18 11 4 1 1
 7 18 12 1 2 1
 7 18 12 2 1 1
 7 18 12 3 1 1
 7 18 12 4 2 1
 7 18 13 1 1 1
 7 18 13 2 1 1
 7 18 13 3 1 1
 7 18 13 4 1 1
 7 18 14 1 2 1
 7 18 14 2 1 1
 7 18 14 3 1 1
 7 18 14 4 1 1
 7 18 15 1 1 1
 7 18 15 2 1 1
 7 18 15 3 2 1
 7 18 15 4 1 1
 7 18 16 1 1 1
 7 18 16 2 1 1
 7 18 16 3 1 1
 7 18 16 4 1 1
 7 18 17 1 1 1
 7 18 17 2 1 1
 7 18 17 3 1 1
 7 18 17 4 2 1
 7 18 18 1 1 1
 7 18 18 2 1 1
 7 18 18 3 1 1
 7 18 18 4 1 1
 7 18 19 1 1 1
 7 18 19 2 1 1
 7 18 19 3 1 1
 7 18 19 4 2 1
 7 18 20 1 1 1
 7 18 20 2 2 1
 7 18 20 3 1 1
 7 18 20 4 1 1
 7 18 21 1 2 1
 7 18 21 2 1 1
 7 18 21 3 2 1
 7 18 21 4 1 1
 7 18 22 1 2 1
 7 18 22 2 1 1
 7 18 22 3 2 1
 7 18 22 4 1 1
 7 18 23 1 1 1
 7 18 23 2 2 1
 7 18 23 3 1 1
 7 18 23 4 2 1
 7 18 24 1 1 1
 7 18 24 2 2 1
 7 18 24 3 1 1
 7 18 24 4 1 1
 7 18 25 1 1 1
 7 18 25 2 2 1
 7 18 25 3 1 1
 7 18 25 4 1 1
 7 18 26 1 1 1
 7 18 26 2 2 1
 7 18 26 3 1 1
 7 18 26 4 1 1
 7 18 27 1 1 1
 7 18 27 2 2 1
 7 18 27 3 1 1
 7 18 27 4 1 1
 7 18 28 1 1 1
 7 18 28 2 2 1
 7 18 28 3 1 1
 7 18 28 4 1 1
 7 18 29 1 1 1
 7 18 29 2 1 1
 7 18 29 3 2 1
 7 18 29 4 2 1
 7 18 30 1 1 1
 7 18 30 2 1 1
 7 18 30 3 1 1
 7 18 30 4 1 1
 7 18 31 1 2 1
 7 18 31 2 2 1
 7 18 31 3 1 1
 7 18 31 4 1 1
 7 18 32 1 2 1
 7 18 32 2 1 1
 7 18 32 3 1 1
 7 18 32 4 1 1
 7 19 1 1 1 1
 7 19 1 2 2 1
 7 19 1 3 1 1
 7 19 1 4 2 1
 7 19 2 1 1 1
 7 19 2 2 1 1
 7 19 2 3 1 1
 7 19 2 4 2 1
 7 19 3 1 1 1
 7 19 3 2 2 1
 7 19 3 3 1 1
 7 19 3 4 1 1
 7 19 4 1 1 1
 7 19 4 2 1 1
 7 19 4 3 1 1
 7 19 4 4 1 1
 7 19 5 1 1 1
 7 19 5 2 1 1
 7 19 5 3 1 1
 7 19 5 4 1 1
 7 19 6 1 1 1
 7 19 6 2 1 1
 7 19 6 3 1 1
 7 19 6 4 2 1
 7 19 7 1 2 1
 7 19 7 2 2 1
 7 19 7 3 2 1
 7 19 7 4 1 1
 7 19 8 1 1 1
 7 19 8 2 1 1
 7 19 8 3 2 1
 7 19 8 4 2 1
 7 19 9 1 1 1
 7 19 9 2 1 1
 7 19 9 3 1 1
 7 19 9 4 1 1
 7 19 10 1 1 1
 7 19 10 2 1 1
 7 19 10 3 1 1
 7 19 10 4 1 1
 7 19 11 1 1 1
 7 19 11 2 1 1
 7 19 11 3 1 1
 7 19 11 4 1 1
 7 19 12 1 1 1
 7 19 12 2 2 1
 7 19 12 3 1 1
 7 19 12 4 2 1
 7 19 13 1 2 1
 7 19 13 2 1 1
 7 19 13 3 1 1
 7 19 13 4 2 1
 7 19 14 1 1 1
 7 19 14 2 1 1
 7 19 14 3 2 1
 7 19 14 4 2 1
 7 19 15 1 1 1
 7 19 15 2 1 1
 7 19 15 3 1 1
 7 19 15 4 1 1
 7 19 16 1 1 1
 7 19 16 2 1 1
 7 19 16 3 2 1
 7 19 16 4 2 1
 7 19 17 1 2 1
 7 19 17 2 1 1
 7 19 17 3 1 1
 7 19 17 4 1 1
 7 19 18 1 1 1
 7 19 18 2 1 1
 7 19 18 3 1 1
 7 19 18 4 1 1
 7 19 19 1 1 1
 7 19 19 2 2 1
 7 19 19 3 1 1
 7 19 19 4 1 1
 7 19 20 1 1 1
 7 19 20 2 1 1
 7 19 20 3 2 1
 7 19 20 4 2 1
 7 19 21 1 1 1
 7 19 21 2 1 1
 7 19 21 3 2 1
 7 19 21 4 2 1
 7 19 22 1 1 1
 7 19 22 2 1 1
 7 19 22 3 1 1
 7 19 22 4 1 1
 7 19 23 1 2 1
 7 19 23 2 1 1
 7 19 23 3 1 1
 7 19 23 4 1 1
 7 19 24 1 1 1
 7 19 24 2 1 1
 7 19 24 3 1 1
 7 19 24 4 2 1
 7 19 25 1 1 1
 7 19 25 2 2 1
 7 19 25 3 1 1
 7 19 25 4 1 1
 7 19 26 1 1 1
 7 19 26 2 1 1
 7 19 26 3 1 1
 7 19 26 4 1 1
 7 19 27 1 2 1
 7 19 27 2 1 1
 7 19 27 3 1 1
 7 19 27 4 1 1
 7 19 28 1 1 1
 7 19 28 2 2 1
 7 19 28 3 1 1
 7 19 28 4 1 1
 7 19 29 1 2 1
 7 19 29 2 1 1
 7 19 29 3 2 1
 7 19 29 4 1 1
 7 19 30 1 1 1
 7 19 30 2 1 1
 7 19 30 3 1 1
 7 19 30 4 1 1
 7 19 31 1 1 1
 7 19 31 2 1 1
 7 19 31 3 1 1
 7 19 31 4 1 1
 7 19 32 1 2 1
 7 19 32 2 1 1
 7 19 32 3 2 1
 7 19 32 4 2 1
 7 20 1 1 1 1
 7 20 1 2 1 1
 7 20 1 3 1 1
 7 20 1 4 1 1
 7 20 2 1 1 1
 7 20 2 2 2 1
 7 20 2 3 2 1
 7 20 2 4 2 1
 7 20 3 1 1 1
 7 20 3 2 2 1
 7 20 3 3 1 1
 7 20 3 4 1 1
 7 20 4 1 1 1
 7 20 4 2 1 1
 7 20 4 3 2 1
 7 20 4 4 1 1
 7 20 5 1 1 1
 7 20 5 2 1 1
 7 20 5 3 1 1
 7 20 5 4 1 1
 7 20 6 1 1 1
 7 20 6 2 2 1
 7 20 6 3 2 1
 7 20 6 4 1 1
 7 20 7 1 1 1
 7 20 7 2 2 1
 7 20 7 3 2 1
 7 20 7 4 1 1
 7 20 8 1 1 1
 7 20 8 2 1 1
 7 20 8 3 2 1
 7 20 8 4 1 1
 7 20 9 1 1 1
 7 20 9 2 2 1
 7 20 9 3 1 1
 7 20 9 4 2 1
 7 20 10 1 2 1
 7 20 10 2 1 1
 7 20 10 3 1 1
 7 20 10 4 1 1
 7 20 11 1 1 1
 7 20 11 2 1 1
 7 20 11 3 2 1
 7 20 11 4 1 1
 7 20 12 1 2 1
 7 20 12 2 1 1
 7 20 12 3 1 1
 7 20 12 4 2 1
 7 20 13 1 1 1
 7 20 13 2 1 1
 7 20 13 3 2 1
 7 20 13 4 2 1
 7 20 14 1 2 1
 7 20 14 2 2 1
 7 20 14 3 1 1
 7 20 14 4 1 1
 7 20 15 1 1 1
 7 20 15 2 1 1
 7 20 15 3 1 1
 7 20 15 4 1 1
 7 20 16 1 1 1
 7 20 16 2 1 1
 7 20 16 3 2 1
 7 20 16 4 1 1
 7 20 17 1 2 1
 7 20 17 2 1 1
 7 20 17 3 2 1
 7 20 17 4 1 1
 7 20 18 1 2 1
 7 20 18 2 2 1
 7 20 18 3 1 1
 7 20 18 4 2 1
 7 20 19 1 1 1
 7 20 19 2 1 1
 7 20 19 3 1 1
 7 20 19 4 1 1
 7 20 20 1 1 1
 7 20 20 2 1 1
 7 20 20 3 2 1
 7 20 20 4 2 1
 7 20 21 1 1 1
 7 20 21 2 1 1
 7 20 21 3 1 1
 7 20 21 4 1 1
 7 20 22 1 1 1
 7 20 22 2 1 1
 7 20 22 3 1 1
 7 20 22 4 1 1
 7 20 23 1 2 1
 7 20 23 2 1 1
 7 20 23 3 1 1
 7 20 23 4 1 1
 7 20 24 1 1 1
 7 20 24 2 1 1
 7 20 24 3 2 1
 7 20 24 4 1 1
 7 20 25 1 2 1
 7 20 25 2 1 1
 7 20 25 3 1 1
 7 20 25 4 1 1
 7 20 26 1 1 1
 7 20 26 2 1 1
 7 20 26 3 1 1
 7 20 26 4 2 1
 7 20 27 1 2 1
 7 20 27 2 1 1
 7 20 27 3 1 1
 7 20 27 4 1 1
 7 20 28 1 1 1
 7 20 28 2 1 1
 7 20 28 3 1 1
 7 20 28 4 1 1
 7 20 29 1 1 1
 7 20 29 2 1 1
 7 20 29 3 1 1
 7 20 29 4 1 1
 7 20 30 1 1 1
 7 20 30 2 1 1
 7 20 30 3 2 1
 7 20 30 4 1 1
 7 20 31 1 2 1
 7 20 31 2 1 1
 7 20 31 3 2 1
 7 20 31 4 2 1
 7 20 32 1 1 1
 7 20 32 2 1 1
 7 20 32 3 2 1
 7 20 32 4 1 1
 7 21 1 1 1 1
 7 21 1 2 2 1
 7 21 1 3 1 1
 7 21 1 4 1 1
 7 21 2 1 1 1
 7 21 2 2 1 1
 7 21 2 3 2 1
 7 21 2 4 1 1
 7 21 3 1 2 1
 7 21 3 2 2 1
 7 21 3 3 1 1
 7 21 3 4 1 1
 7 21 4 1 1 1
 7 21 4 2 1 1
 7 21 4 3 1 1
 7 21 4 4 2 1
 7 21 5 1 2 1
 7 21 5 2 2 1
 7 21 5 3 1 1
 7 21 5 4 2 1
 7 21 6 1 1 1
 7 21 6 2 2 1
 7 21 6 3 2 1
 7 21 6 4 1 1
 7 21 7 1 2 1
 7 21 7 2 1 1
 7 21 7 3 2 1
 7 21 7 4 2 1
 7 21 8 1 1 1
 7 21 8 2 1 1
 7 21 8 3 1 1
 7 21 8 4 2 1
 7 21 9 1 2 1
 7 21 9 2 1 1
 7 21 9 3 1 1
 7 21 9 4 1 1
 7 21 10 1 2 1
 7 21 10 2 1 1
 7 21 10 3 1 1
 7 21 10 4 1 1
 7 21 11 1 2 1
 7 21 11 2 1 1
 7 21 11 3 1 1
 7 21 11 4 2 1
 7 21 12 1 1 1
 7 21 12 2 1 1
 7 21 12 3 2 1
 7 21 12 4 2 1
 7 21 13 1 2 1
 7 21 13 2 1 1
 7 21 13 3 1 1
 7 21 13 4 1 1
 7 21 14 1 1 1
 7 21 14 2 2 1
 7 21 14 3 2 1
 7 21 14 4 1 1
 7 21 15 1 1 1
 7 21 15 2 2 1
 7 21 15 3 1 1
 7 21 15 4 2 1
 7 21 16 1 1 1
 7 21 16 2 2 1
 7 21 16 3 2 1
 7 21 16 4 1 1
 7 21 17 1 1 1
 7 21 17 2 1 1
 7 21 17 3 2 1
 7 21 17 4 2 1
 7 21 18 1 2 1
 7 21 18 2 1 1
 7 21 18 3 1 1
 7 21 18 4 1 1
 7 21 19 1 1 1
 7 21 19 2 1 1
 7 21 19 3 1 1
 7 21 19 4 1 1
 7 21 20 1 1 1
 7 21 20 2 1 1
 7 21 20 3 1 1
 7 21 20 4 1 1
 7 21 21 1 2 1
 7 21 21 2 1 1
 7 21 21 3 1 1
 7 21 21 4 2 1
 7 21 22 1 2 1
 7 21 22 2 2 1
 7 21 22 3 1 1
 7 21 22 4 2 1
 7 21 23 1 2 1
 7 21 23 2 2 1
 7 21 23 3 1 1
 7 21 23 4 1 1
 7 21 24 1 2 1
 7 21 24 2 2 1
 7 21 24 3 1 1
 7 21 24 4 1 1
 7 21 25 1 1 1
 7 21 25 2 1 1
 7 21 25 3 2 1
 7 21 25 4 1 1
 7 21 26 1 1 1
 7 21 26 2 1 1
 7 21 26 3 2 1
 7 21 26 4 1 1
 7 21 27 1 1 1
 7 21 27 2 1 1
 7 21 27 3 2 1
 7 21 27 4 2 1
 7 21 28 1 1 1
 7 21 28 2 1 1
 7 21 28 3 1 1
 7 21 28 4 2 1
 7 21 29 1 1 1
 7 21 29 2 1 1
 7 21 29 3 1 1
 7 21 29 4 1 1
 7 21 30 1 2 1
 7 21 30 2 2 1
 7 21 30 3 1 1
 7 21 30 4 1 1
 7 21 31 1 1 1
 7 21 31 2 1 1
 7 21 31 3 2 1
 7 21 31 4 1 1
 7 21 32 1 1 1
 7 21 32 2 1 1
 7 21 32 3 1 1
 7 21 32 4 2 1
 7 22 1 1 2 1
 7 22 1 2 1 1
 7 22 1 3 1 1
 7 22 1 4 2 1
 7 22 2 1 1 1
 7 22 2 2 1 1
 7 22 2 3 1 1
 7 22 2 4 1 1
 7 22 3 1 2 1
 7 22 3 2 1 1
 7 22 3 3 2 1
 7 22 3 4 1 1
 7 22 4 1 2 1
 7 22 4 2 1 1
 7 22 4 3 1 1
 7 22 4 4 1 1
 7 22 5 1 2 1
 7 22 5 2 1 1
 7 22 5 3 1 1
 7 22 5 4 1 1
 7 22 6 1 1 1
 7 22 6 2 1 1
 7 22 6 3 1 1
 7 22 6 4 1 1
 7 22 7 1 1 1
 7 22 7 2 1 1
 7 22 7 3 2 1
 7 22 7 4 1 1
 7 22 8 1 2 1
 7 22 8 2 1 1
 7 22 8 3 2 1
 7 22 8 4 1 1
 7 22 9 1 1 1
 7 22 9 2 2 1
 7 22 9 3 2 1
 7 22 9 4 2 1
 7 22 10 1 1 1
 7 22 10 2 2 1
 7 22 10 3 2 1
 7 22 10 4 1 1
 7 22 11 1 1 1
 7 22 11 2 2 1
 7 22 11 3 2 1
 7 22 11 4 1 1
 7 22 12 1 1 1
 7 22 12 2 2 1
 7 22 12 3 1 1
 7 22 12 4 2 1
 7 22 13 1 1 1
 7 22 13 2 2 1
 7 22 13 3 1 1
 7 22 13 4 2 1
 7 22 14 1 2 1
 7 22 14 2 2 1
 7 22 14 3 1 1
 7 22 14 4 2 1
 7 22 15 1 1 1
 7 22 15 2 1 1
 7 22 15 3 1 1
 7 22 15 4 1 1
 7 22 16 1 2 1
 7 22 16 2 1 1
 7 22 16 3 1 1
 7 22 16 4 1 1
 7 22 17 1 1 1
 7 22 17 2 2 1
 7 22 17 3 2 1
 7 22 17 4 2 1
 7 22 18 1 1 1
 7 22 18 2 1 1
 7 22 18 3 2 1
 7 22 18 4 2 1
 7 22 19 1 1 1
 7 22 19 2 1 1
 7 22 19 3 1 1
 7 22 19 4 1 1
 7 22 20 1 2 1
 7 22 20 2 2 1
 7 22 20 3 1 1
 7 22 20 4 1 1
 7 22 21 1 2 1
 7 22 21 2 2 1
 7 22 21 3 1 1
 7 22 21 4 1 1
 7 22 22 1 2 1
 7 22 22 2 1 1
 7 22 22 3 2 1
 7 22 22 4 2 1
 7 22 23 1 1 1
 7 22 23 2 2 1
 7 22 23 3 1 1
 7 22 23 4 1 1
 7 22 24 1 1 1
 7 22 24 2 1 1
 7 22 24 3 1 1
 7 22 24 4 2 1
 7 22 25 1 2 1
 7 22 25 2 2 1
 7 22 25 3 1 1
 7 22 25 4 1 1
 7 22 26 1 2 1
 7 22 26 2 2 1
 7 22 26 3 1 1
 7 22 26 4 2 1
 7 22 27 1 1 1
 7 22 27 2 2 1
 7 22 27 3 1 1
 7 22 27 4 1 1
 7 22 28 1 1 1
 7 22 28 2 1 1
 7 22 28 3 1 1
 7 22 28 4 2 1
 7 22 29 1 1 1
 7 22 29 2 1 1
 7 22 29 3 2 1
 7 22 29 4 2 1
 7 22 30 1 1 1
 7 22 30 2 1 1
 7 22 30 3 1 1
 7 22 30 4 1 1
 7 22 31 1 2 1
 7 22 31 2 1 1
 7 22 31 3 1 1
 7 22 31 4 1 1
 7 22 32 1 1 1
 7 22 32 2 1 1
 7 22 32 3 2 1
 7 22 32 4 2 1
 7 23 1 1 1 1
 7 23 1 2 1 1
 7 23 1 3 2 1
 7 23 1 4 1 1
 7 23 2 1 1 1
 7 23 2 2 2 1
 7 23 2 3 1 1
 7 23 2 4 1 1
 7 23 3 1 2 1
 7 23 3 2 2 1
 7 23 3 3 1 1
 7 23 3 4 1 1
 7 23 4 1 2 1
 7 23 4 2 1 1
 7 23 4 3 2 1
 7 23 4 4 2 1
 7 23 5 1 1 1
 7 23 5 2 1 1
 7 23 5 3 2 1
 7 23 5 4 2 1
 7 23 6 1 2 1
 7 23 6 2 1 1
 7 23 6 3 1 1
 7 23 6 4 1 1
 7 23 7 1 1 1
 7 23 7 2 1 1
 7 23 7 3 1 1
 7 23 7 4 1 1
 7 23 8 1 1 1
 7 23 8 2 1 1
 7 23 8 3 1 1
 7 23 8 4 2 1
 7 23 9 1 1 1
 7 23 9 2 2 1
 7 23 9 3 2 1
 7 23 9 4 2 1
 7 23 10 1 1 1
 7 23 10 2 1 1
 7 23 10 3 1 1
 7 23 10 4 2 1
 7 23 11 1 1 1
 7 23 11 2 2 1
 7 23 11 3 1 1
 7 23 11 4 1 1
 7 23 12 1 1 1
 7 23 12 2 1 1
 7 23 12 3 1 1
 7 23 12 4 2 1
 7 23 13 1 1 1
 7 23 13 2 2 1
 7 23 13 3 2 1
 7 23 13 4 2 1
 7 23 14 1 1 1
 7 23 14 2 2 1
 7 23 14 3 1 1
 7 23 14 4 2 1
 7 23 15 1 2 1
 7 23 15 2 1 1
 7 23 15 3 2 1
 7 23 15 4 1 1
 7 23 16 1 1 1
 7 23 16 2 1 1
 7 23 16 3 1 1
 7 23 16 4 1 1
 7 23 17 1 1 1
 7 23 17 2 2 1
 7 23 17 3 2 1
 7 23 17 4 1 1
 7 23 18 1 1 1
 7 23 18 2 1 1
 7 23 18 3 2 1
 7 23 18 4 2 1
 7 23 19 1 2 1
 7 23 19 2 1 1
 7 23 19 3 1 1
 7 23 19 4 1 1
 7 23 20 1 1 1
 7 23 20 2 2 1
 7 23 20 3 1 1
 7 23 20 4 2 1
 7 23 21 1 1 1
 7 23 21 2 1 1
 7 23 21 3 1 1
 7 23 21 4 1 1
 7 23 22 1 2 1
 7 23 22 2 1 1
 7 23 22 3 1 1
 7 23 22 4 1 1
 7 23 23 1 1 1
 7 23 23 2 1 1
 7 23 23 3 1 1
 7 23 23 4 2 1
 7 23 24 1 1 1
 7 23 24 2 1 1
 7 23 24 3 2 1
 7 23 24 4 2 1
 7 23 25 1 1 1
 7 23 25 2 1 1
 7 23 25 3 1 1
 7 23 25 4 2 1
 7 23 26 1 1 1
 7 23 26 2 1 1
 7 23 26 3 1 1
 7 23 26 4 1 1
 7 23 27 1 2 1
 7 23 27 2 2 1
 7 23 27 3 2 1
 7 23 27 4 1 1
 7 23 28 1 1 1
 7 23 28 2 2 1
 7 23 28 3 1 1
 7 23 28 4 1 1
 7 23 29 1 2 1
 7 23 29 2 2 1
 7 23 29 3 2 1
 7 23 29 4 1 1
 7 23 30 1 2 1
 7 23 30 2 1 1
 7 23 30 3 1 1
 7 23 30 4 1 1
 7 23 31 1 1 1
 7 23 31 2 1 1
 7 23 31 3 1 1
 7 23 31 4 1 1
 7 23 32 1 2 1
 7 23 32 2 1 1
 7 23 32 3 1 1
 7 23 32 4 2 1
 7 24 1 1 1 1
 7 24 1 2 2 1
 7 24 1 3 2 1
 7 24 1 4 1 1
 7 24 2 1 2 1
 7 24 2 2 1 1
 7 24 2 3 2 1
 7 24 2 4 1 1
 7 24 3 1 2 1
 7 24 3 2 2 1
 7 24 3 3 1 1
 7 24 3 4 2 1
 7 24 4 1 2 1
 7 24 4 2 1 1
 7 24 4 3 2 1
 7 24 4 4 1 1
 7 24 5 1 1 1
 7 24 5 2 2 1
 7 24 5 3 1 1
 7 24 5 4 1 1
 7 24 6 1 1 1
 7 24 6 2 2 1
 7 24 6 3 1 1
 7 24 6 4 2 1
 7 24 7 1 1 1
 7 24 7 2 1 1
 7 24 7 3 1 1
 7 24 7 4 1 1
 7 24 8 1 2 1
 7 24 8 2 1 1
 7 24 8 3 1 1
 7 24 8 4 1 1
 7 24 9 1 1 1
 7 24 9 2 1 1
 7 24 9 3 1 1
 7 24 9 4 1 1
 7 24 10 1 1 1
 7 24 10 2 1 1
 7 24 10 3 1 1
 7 24 10 4 2 1
 7 24 11 1 1 1
 7 24 11 2 1 1
 7 24 11 3 2 1
 7 24 11 4 2 1
 7 24 12 1 1 1
 7 24 12 2 1 1
 7 24 12 3 2 1
 7 24 12 4 1 1
 7 24 13 1 1 1
 7 24 13 2 1 1
 7 24 13 3 1 1
 7 24 13 4 2 1
 7 24 14 1 1 1
 7 24 14 2 2 1
 7 24 14 3 1 1
 7 24 14 4 2 1
 7 24 15 1 1 1
 7 24 15 2 1 1
 7 24 15 3 1 1
 7 24 15 4 1 1
 7 24 16 1 2 1
 7 24 16 2 1 1
 7 24 16 3 2 1
 7 24 16 4 2 1
 7 24 17 1 2 1
 7 24 17 2 2 1
 7 24 17 3 1 1
 7 24 17 4 1 1
 7 24 18 1 2 1
 7 24 18 2 1 1
 7 24 18 3 1 1
 7 24 18 4 1 1
 7 24 19 1 2 1
 7 24 19 2 2 1
 7 24 19 3 1 1
 7 24 19 4 1 1
 7 24 20 1 1 1
 7 24 20 2 1 1
 7 24 20 3 1 1
 7 24 20 4 1 1
 7 24 21 1 2 1
 7 24 21 2 1 1
 7 24 21 3 1 1
 7 24 21 4 1 1
 7 24 22 1 1 1
 7 24 22 2 1 1
 7 24 22 3 2 1
 7 24 22 4 1 1
 7 24 23 1 1 1
 7 24 23 2 2 1
 7 24 23 3 1 1
 7 24 23 4 2 1
 7 24 24 1 1 1
 7 24 24 2 1 1
 7 24 24 3 2 1
 7 24 24 4 2 1
 7 24 25 1 1 1
 7 24 25 2 1 1
 7 24 25 3 2 1
 7 24 25 4 2 1
 7 24 26 1 2 1
 7 24 26 2 1 1
 7 24 26 3 1 1
 7 24 26 4 2 1
 7 24 27 1 1 1
 7 24 27 2 1 1
 7 24 27 3 1 1
 7 24 27 4 1 1
 7 24 28 1 2 1
 7 24 28 2 1 1
 7 24 28 3 1 1
 7 24 28 4 1 1
 7 24 29 1 2 1
 7 24 29 2 1 1
 7 24 29 3 2 1
 7 24 29 4 1 1
 7 24 30 1 2 1
 7 24 30 2 2 1
 7 24 30 3 1 1
 7 24 30 4 1 1
 7 24 31 1 1 1
 7 24 31 2 1 1
 7 24 31 3 2 1
 7 24 31 4 2 1
 7 24 32 1 1 1
 7 24 32 2 2 1
 7 24 32 3 1 1
 7 24 32 4 1 1
 7 25 1 1 2 1
 7 25 1 2 2 1
 7 25 1 3 1 1
 7 25 1 4 1 1
 7 25 2 1 2 1
 7 25 2 2 1 1
 7 25 2 3 1 1
 7 25 2 4 1 1
 7 25 3 1 1 1
 7 25 3 2 1 1
 7 25 3 3 1 1
 7 25 3 4 2 1
 7 25 4 1 1 1
 7 25 4 2 1 1
 7 25 4 3 2 1
 7 25 4 4 1 1
 7 25 5 1 2 1
 7 25 5 2 1 1
 7 25 5 3 2 1
 7 25 5 4 1 1
 7 25 6 1 1 1
 7 25 6 2 2 1
 7 25 6 3 1 1
 7 25 6 4 1 1
 7 25 7 1 1 1
 7 25 7 2 2 1
 7 25 7 3 1 1
 7 25 7 4 1 1
 7 25 8 1 2 1
 7 25 8 2 1 1
 7 25 8 3 2 1
 7 25 8 4 1 1
 7 25 9 1 1 1
 7 25 9 2 2 1
 7 25 9 3 1 1
 7 25 9 4 1 1
 7 25 10 1 1 1
 7 25 10 2 1 1
 7 25 10 3 2 1
 7 25 10 4 1 1
 7 25 11 1 1 1
 7 25 11 2 2 1
 7 25 11 3 2 1
 7 25 11 4 2 1
 7 25 12 1 1 1
 7 25 12 2 2 1
 7 25 12 3 2 1
 7 25 12 4 1 1
 7 25 13 1 1 1
 7 25 13 2 1 1
 7 25 13 3 1 1
 7 25 13 4 1 1
 7 25 14 1 1 1
 7 25 14 2 2 1
 7 25 14 3 2 1
 7 25 14 4 1 1
 7 25 15 1 1 1
 7 25 15 2 1 1
 7 25 15 3 1 1
 7 25 15 4 2 1
 7 25 16 1 1 1
 7 25 16 2 1 1
 7 25 16 3 2 1
 7 25 16 4 1 1
 7 25 17 1 1 1
 7 25 17 2 2 1
 7 25 17 3 1 1
 7 25 17 4 1 1
 7 25 18 1 2 1
 7 25 18 2 1 1
 7 25 18 3 2 1
 7 25 18 4 1 1
 7 25 19 1 2 1
 7 25 19 2 2 1
 7 25 19 3 1 1
 7 25 19 4 1 1
 7 25 20 1 1 1
[truncated: 1,586,562 more chars]
