# Supplementary material for: A Process for Modelling Diffuse Scattering from Disordered Molecular Crystals, Illustrated by Application to Monoclinic 9-Chloro-10-methylanthracene
Source: Hindawi journal article supplement (doi:10.1155/2015/878463), 2015-01-01
Supplement: f2 [file 878463.f2.zip › 878463.f2/CMA_simulations/CMA_occ_contacts_initial]

  ol  oz  om oat  da  db  dc  dl  dz  dm dat  length  type
   1   1   1   1   0   0   0   4   1   1   1 7.23436        1
   1   1   1   1   0   0   0   4   2   1   1 7.23436        2
   1   1   1   1   0   0   1   4   1   1   1 7.23438        3
   1   1   1   1   0   0   1   4   2   1   1 7.23438        4
   1   1   1   1   1  -1   0   2   1   1   1 6.27422        5
   1   1   1   1   1  -1   0   2   2   1   1 6.27422        6
   1   1   1   1   1  -1   1   3   1   1   1 8.02582        7
   1   1   1   1   1  -1   1   3   2   1   1 8.02582        8
   1   1   1   1   1   0   0   2   1   1   1 6.27422        9
   1   1   1   1   1   0   0   2   2   1   1 6.27422       10
   1   1   1   1   1   0   1   3   1   1   1 3.88137       11
   1   1   1   1   1   0   1   3   2   1   1 3.88136       12
   1   2   1   1   0   0   0   4   1   1   1 7.23436       13
   1   2   1   1   0   0   0   4   2   1   1 7.23436       14
   1   2   1   1   0   0   1   4   1   1   1 7.23438       15
   1   2   1   1   0   0   1   4   2   1   1 7.23438       16
   1   2   1   1   1  -1   0   2   1   1   1 6.27422       17
   1   2   1   1   1  -1   0   2   2   1   1 6.27422       18
   1   2   1   1   1  -1   1   3   1   1   1 8.02582       19
   1   2   1   1   1  -1   1   3   2   1   1 8.02582       20
   1   2   1   1   1   0   0   2   1   1   1 6.27422       21
   1   2   1   1   1   0   0   2   2   1   1 6.27422       22
   1   2   1   1   1   0   1   3   1   1   1 3.88137       23
   1   2   1   1   1   0   1   3   2   1   1 3.88136       24
   2   1   1   1  -1   0   0   1   1   1   1 6.27422       25
   2   1   1   1  -1   0   0   1   2   1   1 6.27422       26
   2   1   1   1  -1   0   0   4   1   1   1 8.02582       27
   2   1   1   1  -1   0   0   4   2   1   1 8.02582       28
   2   1   1   1  -1   1   0   1   1   1   1 6.27422       29
   2   1   1   1  -1   1   0   1   2   1   1 6.27422       30
   2   1   1   1  -1   1   0   4   1   1   1 3.88136       31
   2   1   1   1  -1   1   0   4   2   1   1 3.88136       32
   2   1   1   1   0   0   0   3   1   1   1 7.23436       33
   2   1   1   1   0   0   0   3   2   1   1 7.23437       34
   2   1   1   1   0   0   1   3   1   1   1 7.23438       35
   2   1   1   1   0   0   1   3   2   1   1 7.23437       36
   2   2   1   1  -1   0   0   1   1   1   1 6.27422       37
   2   2   1   1  -1   0   0   1   2   1   1 6.27422       38
   2   2   1   1  -1   0   0   4   1   1   1 8.02582       39
   2   2   1   1  -1   0   0   4   2   1   1 8.02582       40
   2   2   1   1  -1   1   0   1   1   1   1 6.27422       41
   2   2   1   1  -1   1   0   1   2   1   1 6.27422       42
   2   2   1   1  -1   1   0   4   1   1   1 3.88135       43
   2   2   1   1  -1   1   0   4   2   1   1 3.88135       44
   2   2   1   1   0   0   0   3   1   1   1 7.23436       45
   2   2   1   1   0   0   0   3   2   1   1 7.23437       46
   2   2   1   1   0   0   1   3   1   1   1 7.23438       47
   2   2   1   1   0   0   1   3   2   1   1 7.23437       48
   3   1   1   1  -1   0  -1   1   1   1   1 3.88137       49
   3   1   1   1  -1   0  -1   1   2   1   1 3.88137       50
   3   1   1   1  -1   0   0   4   1   1   1 6.27422       51
   3   1   1   1  -1   0   0   4   2   1   1 6.27422       52
   3   1   1   1  -1   1  -1   1   1   1   1 8.02582       53
   3   1   1   1  -1   1  -1   1   2   1   1 8.02582       54
   3   1   1   1  -1   1   0   4   1   1   1 6.27422       55
   3   1   1   1  -1   1   0   4   2   1   1 6.27422       56
   3   1   1   1   0   0  -1   2   1   1   1 7.23438       57
   3   1   1   1   0   0  -1   2   2   1   1 7.23438       58
   3   1   1   1   0   0   0   2   1   1   1 7.23436       59
   3   1   1   1   0   0   0   2   2   1   1 7.23436       60
   3   2   1   1  -1   0  -1   1   1   1   1 3.88136       61
   3   2   1   1  -1   0  -1   1   2   1   1 3.88136       62
   3   2   1   1  -1   0   0   4   1   1   1 6.27422       63
   3   2   1   1  -1   0   0   4   2   1   1 6.27423       64
   3   2   1   1  -1   1  -1   1   1   1   1 8.02582       65
   3   2   1   1  -1   1  -1   1   2   1   1 8.02582       66
   3   2   1   1  -1   1   0   4   1   1   1 6.27422       67
   3   2   1   1  -1   1   0   4   2   1   1 6.27422       68
   3   2   1   1   0   0  -1   2   1   1   1 7.23437       69
   3   2   1   1   0   0  -1   2   2   1   1 7.23437       70
   3   2   1   1   0   0   0   2   1   1   1 7.23437       71
   3   2   1   1   0   0   0   2   2   1   1 7.23437       72
   4   1   1   1   0   0  -1   1   1   1   1 7.23438       73
   4   1   1   1   0   0  -1   1   2   1   1 7.23438       74
   4   1   1   1   0   0   0   1   1   1   1 7.23436       75
   4   1   1   1   0   0   0   1   2   1   1 7.23436       76
   4   1   1   1   1  -1   0   2   1   1   1 3.88136       77
   4   1   1   1   1  -1   0   2   2   1   1 3.88135       78
   4   1   1   1   1  -1   0   3   1   1   1 6.27422       79
   4   1   1   1   1  -1   0   3   2   1   1 6.27422       80
   4   1   1   1   1   0   0   2   1   1   1 8.02582       81
   4   1   1   1   1   0   0   2   2   1   1 8.02582       82
   4   1   1   1   1   0   0   3   1   1   1 6.27422       83
   4   1   1   1   1   0   0   3   2   1   1 6.27422       84
   4   2   1   1   0   0  -1   1   1   1   1 7.23438       85
   4   2   1   1   0   0  -1   1   2   1   1 7.23438       86
   4   2   1   1   0   0   0   1   1   1   1 7.23436       87
   4   2   1   1   0   0   0   1   2   1   1 7.23436       88
   4   2   1   1   1  -1   0   2   1   1   1 3.88136       89
   4   2   1   1   1  -1   0   2   2   1   1 3.88135       90
   4   2   1   1   1  -1   0   3   1   1   1 6.27422       91
   4   2   1   1   1  -1   0   3   2   1   1 6.27422       92
   4   2   1   1   1   0   0   2   1   1   1 8.02582       93
   4   2   1   1   1   0   0   2   2   1   1 8.02582       94
   4   2   1   1   1   0   0   3   1   1   1 6.27422       95
   4   2   1   1   1   0   0   3   2   1   1 6.27423       96
