# Supplementary material for: A Process for Modelling Diffuse Scattering from Disordered Molecular Crystals, Illustrated by Application to Monoclinic 9-Chloro-10-methylanthracene
Source: Hindawi journal article supplement (doi:10.1155/2015/878463), 2015-01-01
Supplement: f2 [file 878463.f2.zip › 878463.f2/CMA_simulations/CMA_occ_contacts_sorted]

ol	oz	om	oat	da	db	dc	dl	dz	dm	dat	length	type
2	1	1	1	-1	1	0	4	1	1	1	3.88136	1
4	1	1	1	1	-1	0	2	1	1	1	3.88136	1
1	1	1	1	1	0	1	3	1	1	1	3.88137	1
3	1	1	1	-1	0	-1	1	1	1	1	3.88137	1
1	1	1	1	1	-1	0	2	1	1	1	6.27422	2
1	1	1	1	1	0	0	2	1	1	1	6.27422	2
2	1	1	1	-1	0	0	1	1	1	1	6.27422	2
2	1	1	1	-1	1	0	1	1	1	1	6.27422	2
3	1	1	1	-1	0	0	4	1	1	1	6.27422	2
3	1	1	1	-1	1	0	4	1	1	1	6.27422	2
4	1	1	1	1	-1	0	3	1	1	1	6.27422	2
4	1	1	1	1	0	0	3	1	1	1	6.27422	2
1	1	1	1	0	0	0	4	1	1	1	7.23436	3
2	1	1	1	0	0	0	3	1	1	1	7.23436	3
3	1	1	1	0	0	0	2	1	1	1	7.23436	3
4	1	1	1	0	0	0	1	1	1	1	7.23436	3
1	1	1	1	0	0	1	4	1	1	1	7.23438	3
2	1	1	1	0	0	1	3	1	1	1	7.23438	3
3	1	1	1	0	0	-1	2	1	1	1	7.23438	3
4	1	1	1	0	0	-1	1	1	1	1	7.23438	3
1	1	1	1	1	-1	1	3	1	1	1	8.02582	4
2	1	1	1	-1	0	0	4	1	1	1	8.02582	4
3	1	1	1	-1	1	-1	1	1	1	1	8.02582	4
4	1	1	1	1	0	0	2	1	1	1	8.02582	4
