# Supplementary material for: A Process for Modelling Diffuse Scattering from Disordered Molecular Crystals, Illustrated by Application to Monoclinic 9-Chloro-10-methylanthracene
Source: Hindawi journal article supplement (doi:10.1155/2015/878463), 2015-01-01
Supplement: f2 [file 878463.f2.zip › 878463.f2/CMA_simulations/CMA_occ_correlations_Epstein]

           1           1           1           1           1           1
           1           1           1           2           1           1
           1           1           1           3           1           1
           1           1           1           4           1           1
           1           1           2           1           1           1
           1           1           2           2           2           1
           1           1           2           3           2           1
           1           1           2           4           1           1
           1           1           3           1           1           1
           1           1           3           2           1           1
           1           1           3           3           2           1
           1           1           3           4           1           1
           1           1           4           1           1           1
           1           1           4           2           1           1
           1           1           4           3           1           1
           1           1           4           4           1           1
           1           1           5           1           1           1
           1           1           5           2           1           1
           1           1           5           3           1           1
           1           1           5           4           1           1
           1           1           6           1           1           1
           1           1           6           2           1           1
           1           1           6           3           2           1
           1           1           6           4           1           1
           1           1           7           1           2           1
           1           1           7           2           1           1
           1           1           7           3           2           1
           1           1           7           4           1           1
           1           1           8           1           1           1
           1           1           8           2           2           1
           1           1           8           3           2           1
           1           1           8           4           1           1
           1           1           9           1           1           1
           1           1           9           2           1           1
           1           1           9           3           1           1
           1           1           9           4           1           1
           1           1          10           1           1           1
           1           1          10           2           1           1
           1           1          10           3           1           1
           1           1          10           4           1           1
           1           1          11           1           2           1
           1           1          11           2           1           1
           1           1          11           3           2           1
           1           1          11           4           1           1
           1           1          12           1           1           1
           1           1          12           2           1           1
           1           1          12           3           1           1
           1           1          12           4           1           1
           1           1          13           1           1           1
           1           1          13           2           1           1
           1           1          13           3           2           1
           1           1          13           4           1           1
           1           1          14           1           1           1
           1           1          14           2           2           1
           1           1          14           3           1           1
           1           1          14           4           2           1
           1           1          15           1           1           1
           1           1          15           2           1           1
           1           1          15           3           1           1
           1           1          15           4           1           1
           1           1          16           1           2           1
           1           1          16           2           1           1
           1           1          16           3           1           1
           1           1          16           4           2           1
           1           1          17           1           1           1
           1           1          17           2           2           1
           1           1          17           3           2           1
           1           1          17           4           1           1
           1           1          18           1           2           1
           1           1          18           2           2           1
           1           1          18           3           1           1
           1           1          18           4           1           1
           1           1          19           1           1           1
           1           1          19           2           1           1
           1           1          19           3           1           1
           1           1          19           4           2           1
           1           1          20           1           2           1
           1           1          20           2           1           1
           1           1          20           3           1           1
           1           1          20           4           2           1
           1           1          21           1           1           1
           1           1          21           2           1           1
           1           1          21           3           1           1
           1           1          21           4           1           1
           1           1          22           1           2           1
           1           1          22           2           2           1
           1           1          22           3           2           1
           1           1          22           4           2           1
           1           1          23           1           2           1
           1           1          23           2           1           1
           1           1          23           3           2           1
           1           1          23           4           1           1
           1           1          24           1           1           1
           1           1          24           2           1           1
           1           1          24           3           2           1
           1           1          24           4           1           1
           1           1          25           1           1           1
           1           1          25           2           1           1
           1           1          25           3           1           1
           1           1          25           4           1           1
           1           1          26           1           1           1
           1           1          26           2           1           1
           1           1          26           3           1           1
           1           1          26           4           1           1
           1           1          27           1           1           1
           1           1          27           2           2           1
           1           1          27           3           1           1
           1           1          27           4           2           1
           1           1          28           1           1           1
           1           1          28           2           1           1
           1           1          28           3           1           1
           1           1          28           4           1           1
           1           1          29           1           1           1
           1           1          29           2           2           1
           1           1          29           3           1           1
           1           1          29           4           1           1
           1           1          30           1           2           1
           1           1          30           2           1           1
           1           1          30           3           1           1
           1           1          30           4           2           1
           1           1          31           1           2           1
           1           1          31           2           1           1
           1           1          31           3           1           1
           1           1          31           4           1           1
           1           1          32           1           2           1
           1           1          32           2           1           1
           1           1          32           3           1           1
           1           1          32           4           1           1
           1           2           1           1           1           1
           1           2           1           2           1           1
           1           2           1           3           1           1
           1           2           1           4           1           1
           1           2           2           1           2           1
           1           2           2           2           2           1
           1           2           2           3           2           1
           1           2           2           4           1           1
           1           2           3           1           2           1
           1           2           3           2           1           1
           1           2           3           3           2           1
           1           2           3           4           1           1
           1           2           4           1           2           1
           1           2           4           2           1           1
           1           2           4           3           1           1
           1           2           4           4           1           1
           1           2           5           1           1           1
           1           2           5           2           1           1
           1           2           5           3           2           1
           1           2           5           4           2           1
           1           2           6           1           1           1
           1           2           6           2           1           1
           1           2           6           3           1           1
           1           2           6           4           1           1
           1           2           7           1           1           1
           1           2           7           2           2           1
           1           2           7           3           2           1
           1           2           7           4           1           1
           1           2           8           1           1           1
           1           2           8           2           2           1
           1           2           8           3           1           1
           1           2           8           4           1           1
           1           2           9           1           1           1
           1           2           9           2           1           1
           1           2           9           3           1           1
           1           2           9           4           1           1
           1           2          10           1           1           1
           1           2          10           2           2           1
           1           2          10           3           1           1
           1           2          10           4           1           1
           1           2          11           1           2           1
           1           2          11           2           1           1
           1           2          11           3           1           1
           1           2          11           4           2           1
           1           2          12           1           2           1
           1           2          12           2           1           1
           1           2          12           3           1           1
           1           2          12           4           1           1
           1           2          13           1           1           1
           1           2          13           2           2           1
           1           2          13           3           2           1
           1           2          13           4           2           1
           1           2          14           1           1           1
           1           2          14           2           2           1
           1           2          14           3           2           1
           1           2          14           4           1           1
           1           2          15           1           1           1
           1           2          15           2           1           1
           1           2          15           3           2           1
           1           2          15           4           1           1
           1           2          16           1           1           1
           1           2          16           2           1           1
           1           2          16           3           1           1
           1           2          16           4           1           1
           1           2          17           1           1           1
           1           2          17           2           2           1
           1           2          17           3           2           1
           1           2          17           4           1           1
           1           2          18           1           1           1
           1           2          18           2           1           1
           1           2          18           3           1           1
           1           2          18           4           1           1
           1           2          19           1           1           1
           1           2          19           2           1           1
           1           2          19           3           2           1
           1           2          19           4           1           1
           1           2          20           1           1           1
           1           2          20           2           2           1
           1           2          20           3           1           1
           1           2          20           4           1           1
           1           2          21           1           1           1
           1           2          21           2           2           1
           1           2          21           3           2           1
           1           2          21           4           2           1
           1           2          22           1           1           1
           1           2          22           2           2           1
           1           2          22           3           2           1
           1           2          22           4           2           1
           1           2          23           1           1           1
           1           2          23           2           2           1
           1           2          23           3           2           1
           1           2          23           4           1           1
           1           2          24           1           2           1
           1           2          24           2           1           1
           1           2          24           3           1           1
           1           2          24           4           1           1
           1           2          25           1           2           1
           1           2          25           2           1           1
           1           2          25           3           1           1
           1           2          25           4           2           1
           1           2          26           1           2           1
           1           2          26           2           1           1
           1           2          26           3           1           1
           1           2          26           4           2           1
           1           2          27           1           1           1
           1           2          27           2           2           1
           1           2          27           3           1           1
           1           2          27           4           1           1
           1           2          28           1           1           1
           1           2          28           2           1           1
           1           2          28           3           2           1
           1           2          28           4           1           1
           1           2          29           1           1           1
           1           2          29           2           2           1
           1           2          29           3           2           1
           1           2          29           4           2           1
           1           2          30           1           2           1
           1           2          30           2           1           1
           1           2          30           3           1           1
           1           2          30           4           2           1
           1           2          31           1           2           1
           1           2          31           2           1           1
           1           2          31           3           1           1
           1           2          31           4           1           1
           1           2          32           1           2           1
           1           2          32           2           2           1
           1           2          32           3           1           1
           1           2          32           4           1           1
           1           3           1           1           1           1
           1           3           1           2           1           1
           1           3           1           3           1           1
           1           3           1           4           1           1
           1           3           2           1           2           1
           1           3           2           2           1           1
           1           3           2           3           1           1
           1           3           2           4           1           1
           1           3           3           1           1           1
           1           3           3           2           2           1
           1           3           3           3           2           1
           1           3           3           4           1           1
           1           3           4           1           2           1
           1           3           4           2           2           1
           1           3           4           3           1           1
           1           3           4           4           2           1
           1           3           5           1           2           1
           1           3           5           2           1           1
           1           3           5           3           1           1
           1           3           5           4           1           1
           1           3           6           1           1           1
           1           3           6           2           1           1
           1           3           6           3           1           1
           1           3           6           4           1           1
           1           3           7           1           1           1
           1           3           7           2           1           1
           1           3           7           3           1           1
           1           3           7           4           1           1
           1           3           8           1           1           1
           1           3           8           2           1           1
           1           3           8           3           1           1
           1           3           8           4           1           1
           1           3           9           1           2           1
           1           3           9           2           2           1
           1           3           9           3           1           1
           1           3           9           4           1           1
           1           3          10           1           1           1
           1           3          10           2           1           1
           1           3          10           3           2           1
           1           3          10           4           1           1
           1           3          11           1           1           1
           1           3          11           2           1           1
           1           3          11           3           2           1
           1           3          11           4           1           1
           1           3          12           1           1           1
           1           3          12           2           1           1
           1           3          12           3           1           1
           1           3          12           4           1           1
           1           3          13           1           1           1
           1           3          13           2           1           1
           1           3          13           3           1           1
           1           3          13           4           1           1
           1           3          14           1           2           1
           1           3          14           2           2           1
           1           3          14           3           2           1
           1           3          14           4           1           1
           1           3          15           1           1           1
           1           3          15           2           1           1
           1           3          15           3           1           1
           1           3          15           4           2           1
           1           3          16           1           1           1
           1           3          16           2           1           1
           1           3          16           3           1           1
           1           3          16           4           1           1
           1           3          17           1           1           1
           1           3          17           2           1           1
           1           3          17           3           1           1
           1           3          17           4           1           1
           1           3          18           1           2           1
           1           3          18           2           1           1
           1           3          18           3           1           1
           1           3          18           4           2           1
           1           3          19           1           2           1
           1           3          19           2           1           1
           1           3          19           3           1           1
           1           3          19           4           1           1
           1           3          20           1           2           1
           1           3          20           2           1           1
           1           3          20           3           2           1
           1           3          20           4           1           1
           1           3          21           1           1           1
           1           3          21           2           2           1
           1           3          21           3           2           1
           1           3          21           4           1           1
           1           3          22           1           1           1
           1           3          22           2           2           1
           1           3          22           3           2           1
           1           3          22           4           1           1
           1           3          23           1           1           1
           1           3          23           2           1           1
           1           3          23           3           2           1
           1           3          23           4           1           1
           1           3          24           1           1           1
           1           3          24           2           2           1
           1           3          24           3           2           1
           1           3          24           4           1           1
           1           3          25           1           1           1
           1           3          25           2           2           1
           1           3          25           3           2           1
           1           3          25           4           2           1
           1           3          26           1           2           1
           1           3          26           2           1           1
           1           3          26           3           1           1
           1           3          26           4           1           1
           1           3          27           1           1           1
           1           3          27           2           1           1
           1           3          27           3           1           1
           1           3          27           4           1           1
           1           3          28           1           2           1
           1           3          28           2           2           1
           1           3          28           3           1           1
           1           3          28           4           1           1
           1           3          29           1           1           1
           1           3          29           2           1           1
           1           3          29           3           1           1
           1           3          29           4           1           1
           1           3          30           1           2           1
           1           3          30           2           1           1
           1           3          30           3           1           1
           1           3          30           4           2           1
           1           3          31           1           1           1
           1           3          31           2           1           1
           1           3          31           3           1           1
           1           3          31           4           1           1
           1           3          32           1           1           1
           1           3          32           2           2           1
           1           3          32           3           1           1
           1           3          32           4           2           1
           1           4           1           1           2           1
           1           4           1           2           1           1
           1           4           1           3           1           1
           1           4           1           4           1           1
           1           4           2           1           1           1
           1           4           2           2           1           1
           1           4           2           3           1           1
           1           4           2           4           1           1
           1           4           3           1           1           1
           1           4           3           2           2           1
           1           4           3           3           2           1
           1           4           3           4           2           1
           1           4           4           1           1           1
           1           4           4           2           1           1
           1           4           4           3           1           1
           1           4           4           4           2           1
           1           4           5           1           1           1
           1           4           5           2           1           1
           1           4           5           3           1           1
           1           4           5           4           2           1
           1           4           6           1           1           1
           1           4           6           2           1           1
           1           4           6           3           1           1
           1           4           6           4           1           1
           1           4           7           1           2           1
           1           4           7           2           1           1
           1           4           7           3           1           1
           1           4           7           4           1           1
           1           4           8           1           2           1
           1           4           8           2           1           1
           1           4           8           3           1           1
           1           4           8           4           1           1
           1           4           9           1           1           1
           1           4           9           2           2           1
           1           4           9           3           1           1
           1           4           9           4           2           1
           1           4          10           1           2           1
           1           4          10           2           1           1
           1           4          10           3           1           1
           1           4          10           4           1           1
           1           4          11           1           1           1
           1           4          11           2           1           1
           1           4          11           3           1           1
           1           4          11           4           1           1
           1           4          12           1           1           1
           1           4          12           2           1           1
           1           4          12           3           1           1
           1           4          12           4           2           1
           1           4          13           1           2           1
           1           4          13           2           1           1
           1           4          13           3           1           1
           1           4          13           4           1           1
           1           4          14           1           2           1
           1           4          14           2           1           1
           1           4          14           3           1           1
           1           4          14           4           1           1
           1           4          15           1           2           1
           1           4          15           2           1           1
           1           4          15           3           2           1
           1           4          15           4           1           1
           1           4          16           1           1           1
           1           4          16           2           2           1
           1           4          16           3           1           1
           1           4          16           4           2           1
           1           4          17           1           1           1
           1           4          17           2           1           1
           1           4          17           3           1           1
           1           4          17           4           1           1
           1           4          18           1           1           1
           1           4          18           2           2           1
           1           4          18           3           1           1
           1           4          18           4           1           1
           1           4          19           1           2           1
           1           4          19           2           1           1
           1           4          19           3           1           1
           1           4          19           4           1           1
           1           4          20           1           1           1
           1           4          20           2           2           1
           1           4          20           3           1           1
           1           4          20           4           1           1
           1           4          21           1           1           1
           1           4          21           2           1           1
           1           4          21           3           2           1
           1           4          21           4           1           1
           1           4          22           1           1           1
           1           4          22           2           1           1
           1           4          22           3           2           1
           1           4          22           4           1           1
           1           4          23           1           2           1
           1           4          23           2           1           1
           1           4          23           3           1           1
           1           4          23           4           1           1
           1           4          24           1           2           1
           1           4          24           2           1           1
           1           4          24           3           1           1
           1           4          24           4           1           1
           1           4          25           1           1           1
           1           4          25           2           1           1
           1           4          25           3           1           1
           1           4          25           4           1           1
           1           4          26           1           2           1
           1           4          26           2           1           1
           1           4          26           3           1           1
           1           4          26           4           2           1
           1           4          27           1           1           1
           1           4          27           2           1           1
           1           4          27           3           2           1
           1           4          27           4           1           1
           1           4          28           1           1           1
           1           4          28           2           2           1
           1           4          28           3           1           1
           1           4          28           4           2           1
           1           4          29           1           2           1
           1           4          29           2           1           1
           1           4          29           3           1           1
           1           4          29           4           1           1
           1           4          30           1           2           1
           1           4          30           2           1           1
           1           4          30           3           1           1
           1           4          30           4           1           1
           1           4          31           1           1           1
           1           4          31           2           2           1
           1           4          31           3           1           1
           1           4          31           4           2           1
           1           4          32           1           2           1
           1           4          32           2           1           1
           1           4          32           3           1           1
           1           4          32           4           1           1
           1           5           1           1           1           1
           1           5           1           2           2           1
           1           5           1           3           1           1
           1           5           1           4           2           1
           1           5           2           1           1           1
           1           5           2           2           1           1
           1           5           2           3           2           1
           1           5           2           4           2           1
           1           5           3           1           1           1
           1           5           3           2           2           1
           1           5           3           3           1           1
           1           5           3           4           2           1
           1           5           4           1           2           1
           1           5           4           2           1           1
           1           5           4           3           1           1
           1           5           4           4           1           1
           1           5           5           1           1           1
           1           5           5           2           1           1
           1           5           5           3           1           1
           1           5           5           4           1           1
           1           5           6           1           1           1
           1           5           6           2           1           1
           1           5           6           3           1           1
           1           5           6           4           1           1
           1           5           7           1           1           1
           1           5           7           2           2           1
           1           5           7           3           1           1
           1           5           7           4           1           1
           1           5           8           1           2           1
           1           5           8           2           2           1
           1           5           8           3           1           1
           1           5           8           4           1           1
           1           5           9           1           1           1
           1           5           9           2           1           1
           1           5           9           3           2           1
           1           5           9           4           1           1
           1           5          10           1           1           1
           1           5          10           2           1           1
           1           5          10           3           1           1
           1           5          10           4           2           1
           1           5          11           1           1           1
           1           5          11           2           2           1
           1           5          11           3           1           1
           1           5          11           4           2           1
           1           5          12           1           1           1
           1           5          12           2           2           1
           1           5          12           3           1           1
           1           5          12           4           1           1
           1           5          13           1           1           1
           1           5          13           2           1           1
           1           5          13           3           2           1
           1           5          13           4           2           1
           1           5          14           1           2           1
           1           5          14           2           1           1
           1           5          14           3           1           1
           1           5          14           4           2           1
           1           5          15           1           1           1
           1           5          15           2           1           1
           1           5          15           3           2           1
           1           5          15           4           2           1
           1           5          16           1           2           1
           1           5          16           2           2           1
           1           5          16           3           1           1
           1           5          16           4           1           1
           1           5          17           1           1           1
           1           5          17           2           2           1
           1           5          17           3           2           1
           1           5          17           4           1           1
           1           5          18           1           1           1
           1           5          18           2           1           1
           1           5          18           3           2           1
           1           5          18           4           1           1
           1           5          19           1           2           1
           1           5          19           2           1           1
           1           5          19           3           1           1
           1           5          19           4           1           1
           1           5          20           1           1           1
           1           5          20           2           1           1
           1           5          20           3           1           1
           1           5          20           4           1           1
           1           5          21           1           1           1
           1           5          21           2           2           1
           1           5          21           3           1           1
           1           5          21           4           1           1
           1           5          22           1           2           1
           1           5          22           2           2           1
           1           5          22           3           1           1
           1           5          22           4           1           1
           1           5          23           1           2           1
           1           5          23           2           1           1
           1           5          23           3           1           1
           1           5          23           4           2           1
           1           5          24           1           1           1
           1           5          24           2           1           1
           1           5          24           3           1           1
           1           5          24           4           1           1
           1           5          25           1           1           1
           1           5          25           2           1           1
           1           5          25           3           1           1
           1           5          25           4           1           1
           1           5          26           1           1           1
           1           5          26           2           1           1
           1           5          26           3           2           1
           1           5          26           4           1           1
           1           5          27           1           1           1
           1           5          27           2           1           1
           1           5          27           3           1           1
           1           5          27           4           2           1
           1           5          28           1           1           1
           1           5          28           2           2           1
           1           5          28           3           2           1
           1           5          28           4           1           1
           1           5          29           1           1           1
           1           5          29           2           1           1
           1           5          29           3           1           1
           1           5          29           4           1           1
           1           5          30           1           1           1
           1           5          30           2           1           1
           1           5          30           3           1           1
           1           5          30           4           1           1
           1           5          31           1           1           1
           1           5          31           2           2           1
           1           5          31           3           1           1
           1           5          31           4           1           1
           1           5          32           1           2           1
           1           5          32           2           1           1
           1           5          32           3           2           1
           1           5          32           4           2           1
           1           6           1           1           1           1
           1           6           1           2           1           1
           1           6           1           3           1           1
           1           6           1           4           1           1
           1           6           2           1           1           1
           1           6           2           2           1           1
           1           6           2           3           1           1
           1           6           2           4           2           1
           1           6           3           1           1           1
           1           6           3           2           2           1
           1           6           3           3           1           1
           1           6           3           4           2           1
           1           6           4           1           2           1
           1           6           4           2           1           1
           1           6           4           3           1           1
           1           6           4           4           2           1
           1           6           5           1           1           1
           1           6           5           2           1           1
           1           6           5           3           1           1
           1           6           5           4           2           1
           1           6           6           1           1           1
           1           6           6           2           2           1
           1           6           6           3           2           1
           1           6           6           4           2           1
           1           6           7           1           2           1
           1           6           7           2           1           1
           1           6           7           3           1           1
           1           6           7           4           1           1
           1           6           8           1           1           1
           1           6           8           2           1           1
           1           6           8           3           1           1
           1           6           8           4           2           1
           1           6           9           1           2           1
           1           6           9           2           1           1
           1           6           9           3           1           1
           1           6           9           4           2           1
           1           6          10           1           1           1
           1           6          10           2           2           1
           1           6          10           3           1           1
           1           6          10           4           1           1
           1           6          11           1           1           1
           1           6          11           2           1           1
           1           6          11           3           1           1
           1           6          11           4           1           1
           1           6          12           1           2           1
           1           6          12           2           1           1
           1           6          12           3           1           1
           1           6          12           4           1           1
           1           6          13           1           1           1
           1           6          13           2           1           1
           1           6          13           3           1           1
           1           6          13           4           2           1
           1           6          14           1           1           1
           1           6          14           2           2           1
           1           6          14           3           1           1
           1           6          14           4           1           1
           1           6          15           1           1           1
           1           6          15           2           1           1
           1           6          15           3           1           1
           1           6          15           4           1           1
           1           6          16           1           2           1
           1           6          16           2           2           1
           1           6          16           3           2           1
           1           6          16           4           1           1
           1           6          17           1           1           1
           1           6          17           2           1           1
           1           6          17           3           2           1
           1           6          17           4           1           1
           1           6          18           1           1           1
           1           6          18           2           1           1
           1           6          18           3           1           1
           1           6          18           4           2           1
           1           6          19           1           1           1
           1           6          19           2           1           1
           1           6          19           3           1           1
           1           6          19           4           2           1
           1           6          20           1           2           1
           1           6          20           2           2           1
           1           6          20           3           1           1
           1           6          20           4           2           1
           1           6          21           1           2           1
           1           6          21           2           1           1
           1           6          21           3           2           1
           1           6          21           4           1           1
           1           6          22           1           1           1
           1           6          22           2           2           1
           1           6          22           3           2           1
           1           6          22           4           1           1
           1           6          23           1           2           1
           1           6          23           2           2           1
           1           6          23           3           1           1
           1           6          23           4           1           1
           1           6          24           1           1           1
           1           6          24           2           2           1
           1           6          24           3           1           1
           1           6          24           4           2           1
           1           6          25           1           2           1
           1           6          25           2           2           1
           1           6          25           3           2           1
           1           6          25           4           2           1
           1           6          26           1           2           1
           1           6          26           2           1           1
           1           6          26           3           1           1
           1           6          26           4           1           1
           1           6          27           1           1           1
           1           6          27           2           1           1
           1           6          27           3           2           1
           1           6          27           4           1           1
           1           6          28           1           1           1
           1           6          28           2           2           1
           1           6          28           3           2           1
           1           6          28           4           1           1
           1           6          29           1           1           1
           1           6          29           2           2           1
           1           6          29           3           2           1
           1           6          29           4           1           1
           1           6          30           1           1           1
           1           6          30           2           1           1
           1           6          30           3           1           1
           1           6          30           4           1           1
           1           6          31           1           1           1
           1           6          31           2           1           1
           1           6          31           3           1           1
           1           6          31           4           1           1
           1           6          32           1           1           1
           1           6          32           2           1           1
           1           6          32           3           2           1
           1           6          32           4           1           1
           1           7           1           1           2           1
           1           7           1           2           2           1
           1           7           1           3           1           1
           1           7           1           4           1           1
           1           7           2           1           2           1
           1           7           2           2           2           1
           1           7           2           3           1           1
           1           7           2           4           1           1
           1           7           3           1           1           1
           1           7           3           2           1           1
           1           7           3           3           1           1
           1           7           3           4           2           1
           1           7           4           1           1           1
           1           7           4           2           1           1
           1           7           4           3           1           1
           1           7           4           4           2           1
           1           7           5           1           2           1
           1           7           5           2           1           1
           1           7           5           3           1           1
           1           7           5           4           2           1
           1           7           6           1           2           1
           1           7           6           2           1           1
           1           7           6           3           1           1
           1           7           6           4           2           1
           1           7           7           1           1           1
           1           7           7           2           1           1
           1           7           7           3           1           1
           1           7           7           4           2           1
           1           7           8           1           2           1
           1           7           8           2           2           1
           1           7           8           3           2           1
           1           7           8           4           2           1
           1           7           9           1           2           1
           1           7           9           2           1           1
           1           7           9           3           1           1
           1           7           9           4           1           1
           1           7          10           1           1           1
           1           7          10           2           1           1
           1           7          10           3           1           1
           1           7          10           4           2           1
           1           7          11           1           2           1
           1           7          11           2           1           1
           1           7          11           3           1           1
           1           7          11           4           1           1
           1           7          12           1           1           1
           1           7          12           2           1           1
           1           7          12           3           1           1
           1           7          12           4           1           1
           1           7          13           1           1           1
           1           7          13           2           1           1
           1           7          13           3           1           1
           1           7          13           4           1           1
           1           7          14           1           1           1
           1           7          14           2           1           1
           1           7          14           3           2           1
           1           7          14           4           1           1
           1           7          15           1           2           1
           1           7          15           2           1           1
           1           7          15           3           1           1
           1           7          15           4           1           1
           1           7          16           1           1           1
           1           7          16           2           1           1
           1           7          16           3           1           1
           1           7          16           4           1           1
           1           7          17           1           1           1
           1           7          17           2           1           1
           1           7          17           3           1           1
           1           7          17           4           1           1
           1           7          18           1           1           1
           1           7          18           2           1           1
           1           7          18           3           1           1
           1           7          18           4           1           1
           1           7          19           1           2           1
           1           7          19           2           1           1
           1           7          19           3           1           1
           1           7          19           4           1           1
           1           7          20           1           2           1
           1           7          20           2           1           1
           1           7          20           3           2           1
           1           7          20           4           2           1
           1           7          21           1           2           1
           1           7          21           2           1           1
           1           7          21           3           1           1
           1           7          21           4           2           1
           1           7          22           1           2           1
           1           7          22           2           2           1
           1           7          22           3           1           1
           1           7          22           4           2           1
           1           7          23           1           1           1
           1           7          23           2           1           1
           1           7          23           3           2           1
           1           7          23           4           1           1
           1           7          24           1           1           1
           1           7          24           2           2           1
           1           7          24           3           2           1
           1           7          24           4           1           1
           1           7          25           1           1           1
           1           7          25           2           1           1
           1           7          25           3           2           1
           1           7          25           4           1           1
           1           7          26           1           1           1
           1           7          26           2           1           1
           1           7          26           3           2           1
           1           7          26           4           1           1
           1           7          27           1           1           1
           1           7          27           2           2           1
           1           7          27           3           1           1
           1           7          27           4           1           1
           1           7          28           1           1           1
           1           7          28           2           1           1
           1           7          28           3           1           1
           1           7          28           4           2           1
           1           7          29           1           2           1
           1           7          29           2           2           1
           1           7          29           3           1           1
           1           7          29           4           1           1
           1           7          30           1           2           1
           1           7          30           2           2           1
           1           7          30           3           1           1
           1           7          30           4           2           1
           1           7          31           1           1           1
           1           7          31           2           2           1
           1           7          31           3           1           1
           1           7          31           4           1           1
           1           7          32           1           2           1
           1           7          32           2           1           1
           1           7          32           3           1           1
           1           7          32           4           2           1
           1           8           1           1           1           1
           1           8           1           2           2           1
           1           8           1           3           1           1
           1           8           1           4           2           1
           1           8           2           1           1           1
           1           8           2           2           2           1
           1           8           2           3           2           1
           1           8           2           4           1           1
           1           8           3           1           2           1
           1           8           3           2           1           1
           1           8           3           3           1           1
           1           8           3           4           2           1
           1           8           4           1           2           1
           1           8           4           2           2           1
           1           8           4           3           1           1
           1           8           4           4           2           1
           1           8           5           1           1           1
           1           8           5           2           2           1
           1           8           5           3           2           1
           1           8           5           4           1           1
           1           8           6           1           2           1
           1           8           6           2           1           1
           1           8           6           3           1           1
           1           8           6           4           1           1
           1           8           7           1           1           1
           1           8           7           2           1           1
           1           8           7           3           1           1
           1           8           7           4           1           1
           1           8           8           1           2           1
           1           8           8           2           1           1
           1           8           8           3           1           1
           1           8           8           4           2           1
           1           8           9           1           1           1
           1           8           9           2           2           1
           1           8           9           3           2           1
           1           8           9           4           1           1
           1           8          10           1           2           1
           1           8          10           2           1           1
           1           8          10           3           1           1
           1           8          10           4           1           1
           1           8          11           1           2           1
           1           8          11           2           2           1
           1           8          11           3           1           1
           1           8          11           4           1           1
           1           8          12           1           1           1
           1           8          12           2           1           1
           1           8          12           3           2           1
           1           8          12           4           1           1
           1           8          13           1           1           1
           1           8          13           2           1           1
           1           8          13           3           1           1
           1           8          13           4           1           1
           1           8          14           1           2           1
           1           8          14           2           1           1
           1           8          14           3           1           1
           1           8          14           4           1           1
           1           8          15           1           2           1
           1           8          15           2           2           1
           1           8          15           3           1           1
           1           8          15           4           2           1
           1           8          16           1           2           1
           1           8          16           2           2           1
           1           8          16           3           2           1
           1           8          16           4           1           1
           1           8          17           1           2           1
           1           8          17           2           1           1
           1           8          17           3           1           1
           1           8          17           4           2           1
           1           8          18           1           1           1
           1           8          18           2           1           1
           1           8          18           3           1           1
           1           8          18           4           1           1
           1           8          19           1           2           1
           1           8          19           2           2           1
           1           8          19           3           2           1
           1           8          19           4           2           1
           1           8          20           1           1           1
           1           8          20           2           1           1
           1           8          20           3           1           1
           1           8          20           4           2           1
           1           8          21           1           1           1
           1           8          21           2           1           1
           1           8          21           3           1           1
           1           8          21           4           2           1
           1           8          22           1           1           1
           1           8          22           2           1           1
           1           8          22           3           1           1
           1           8          22           4           2           1
           1           8          23           1           1           1
           1           8          23           2           1           1
           1           8          23           3           2           1
           1           8          23           4           1           1
           1           8          24           1           1           1
           1           8          24           2           2           1
           1           8          24           3           2           1
           1           8          24           4           1           1
           1           8          25           1           2           1
           1           8          25           2           1           1
           1           8          25           3           2           1
           1           8          25           4           2           1
           1           8          26           1           1           1
           1           8          26           2           1           1
           1           8          26           3           1           1
           1           8          26           4           2           1
           1           8          27           1           1           1
           1           8          27           2           2           1
           1           8          27           3           1           1
           1           8          27           4           2           1
           1           8          28           1           2           1
           1           8          28           2           2           1
           1           8          28           3           1           1
           1           8          28           4           1           1
           1           8          29           1           1           1
           1           8          29           2           2           1
           1           8          29           3           2           1
           1           8          29           4           1           1
           1           8          30           1           1           1
           1           8          30           2           2           1
           1           8          30           3           2           1
           1           8          30           4           2           1
           1           8          31           1           1           1
           1           8          31           2           2           1
           1           8          31           3           2           1
           1           8          31           4           2           1
           1           8          32           1           1           1
           1           8          32           2           2           1
           1           8          32           3           2           1
           1           8          32           4           2           1
           1           9           1           1           1           1
           1           9           1           2           1           1
           1           9           1           3           1           1
           1           9           1           4           1           1
           1           9           2           1           2           1
           1           9           2           2           2           1
           1           9           2           3           2           1
           1           9           2           4           2           1
           1           9           3           1           1           1
           1           9           3           2           1           1
           1           9           3           3           1           1
           1           9           3           4           1           1
           1           9           4           1           1           1
           1           9           4           2           1           1
           1           9           4           3           1           1
           1           9           4           4           2           1
           1           9           5           1           2           1
           1           9           5           2           1           1
           1           9           5           3           1           1
           1           9           5           4           1           1
           1           9           6           1           1           1
           1           9           6           2           2           1
           1           9           6           3           1           1
           1           9           6           4           1           1
           1           9           7           1           1           1
           1           9           7           2           1           1
           1           9           7           3           1           1
           1           9           7           4           2           1
           1           9           8           1           1           1
           1           9           8           2           1           1
           1           9           8           3           1           1
           1           9           8           4           1           1
           1           9           9           1           1           1
           1           9           9           2           2           1
           1           9           9           3           1           1
           1           9           9           4           1           1
           1           9          10           1           2           1
           1           9          10           2           1           1
           1           9          10           3           1           1
           1           9          10           4           2           1
           1           9          11           1           1           1
           1           9          11           2           1           1
           1           9          11           3           2           1
           1           9          11           4           2           1
           1           9          12           1           2           1
           1           9          12           2           1           1
           1           9          12           3           1           1
           1           9          12           4           1           1
           1           9          13           1           1           1
           1           9          13           2           1           1
           1           9          13           3           1           1
           1           9          13           4           2           1
           1           9          14           1           2           1
           1           9          14           2           1           1
           1           9          14           3           1           1
           1           9          14           4           2           1
           1           9          15           1           1           1
           1           9          15           2           2           1
           1           9          15           3           2           1
           1           9          15           4           1           1
           1           9          16           1           1           1
           1           9          16           2           1           1
           1           9          16           3           2           1
           1           9          16           4           2           1
           1           9          17           1           1           1
           1           9          17           2           2           1
           1           9          17           3           1           1
           1           9          17           4           1           1
           1           9          18           1           2           1
           1           9          18           2           1           1
           1           9          18           3           1           1
           1           9          18           4           1           1
           1           9          19           1           1           1
           1           9          19           2           1           1
           1           9          19           3           2           1
           1           9          19           4           1           1
           1           9          20           1           1           1
           1           9          20           2           1           1
           1           9          20           3           2           1
           1           9          20           4           2           1
           1           9          21           1           1           1
           1           9          21           2           1           1
           1           9          21           3           1           1
           1           9          21           4           1           1
           1           9          22           1           1           1
           1           9          22           2           1           1
           1           9          22           3           1           1
           1           9          22           4           1           1
           1           9          23           1           1           1
           1           9          23           2           1           1
           1           9          23           3           2           1
           1           9          23           4           1           1
           1           9          24           1           1           1
           1           9          24           2           2           1
           1           9          24           3           2           1
           1           9          24           4           2           1
           1           9          25           1           1           1
           1           9          25           2           1           1
           1           9          25           3           2           1
           1           9          25           4           1           1
           1           9          26           1           1           1
           1           9          26           2           1           1
           1           9          26           3           2           1
           1           9          26           4           2           1
           1           9          27           1           1           1
           1           9          27           2           2           1
           1           9          27           3           2           1
           1           9          27           4           1           1
           1           9          28           1           1           1
           1           9          28           2           2           1
           1           9          28           3           2           1
           1           9          28           4           1           1
           1           9          29           1           1           1
           1           9          29           2           1           1
           1           9          29           3           1           1
           1           9          29           4           1           1
           1           9          30           1           2           1
           1           9          30           2           1           1
           1           9          30           3           1           1
           1           9          30           4           1           1
           1           9          31           1           2           1
           1           9          31           2           2           1
           1           9          31           3           2           1
           1           9          31           4           1           1
           1           9          32           1           1           1
           1           9          32           2           2           1
           1           9          32           3           1           1
           1           9          32           4           1           1
           1          10           1           1           1           1
           1          10           1           2           1           1
           1          10           1           3           1           1
           1          10           1           4           1           1
           1          10           2           1           1           1
           1          10           2           2           2           1
           1          10           2           3           1           1
           1          10           2           4           2           1
           1          10           3           1           1           1
           1          10           3           2           1           1
           1          10           3           3           2           1
           1          10           3           4           1           1
           1          10           4           1           2           1
           1          10           4           2           2           1
           1          10           4           3           1           1
           1          10           4           4           1           1
           1          10           5           1           1           1
           1          10           5           2           1           1
           1          10           5           3           1           1
           1          10           5           4           1           1
           1          10           6           1           1           1
           1          10           6           2           1           1
           1          10           6           3           1           1
           1          10           6           4           1           1
           1          10           7           1           1           1
           1          10           7           2           1           1
           1          10           7           3           1           1
           1          10           7           4           1           1
           1          10           8           1           1           1
           1          10           8           2           1           1
           1          10           8           3           1           1
           1          10           8           4           1           1
           1          10           9           1           1           1
           1          10           9           2           1           1
           1          10           9           3           2           1
           1          10           9           4           1           1
           1          10          10           1           1           1
           1          10          10           2           1           1
           1          10          10           3           2           1
           1          10          10           4           1           1
           1          10          11           1           1           1
           1          10          11           2           1           1
           1          10          11           3           1           1
           1          10          11           4           1           1
           1          10          12           1           2           1
           1          10          12           2           1           1
           1          10          12           3           2           1
           1          10          12           4           1           1
           1          10          13           1           1           1
           1          10          13           2           2           1
           1          10          13           3           1           1
           1          10          13           4           1           1
           1          10          14           1           1           1
           1          10          14           2           1           1
           1          10          14           3           1           1
           1          10          14           4           1           1
           1          10          15           1           1           1
           1          10          15           2           1           1
           1          10          15           3           2           1
           1          10          15           4           2           1
           1          10          16           1           1           1
           1          10          16           2           2           1
           1          10          16           3           1           1
           1          10          16           4           1           1
           1          10          17           1           1           1
           1          10          17           2           1           1
           1          10          17           3           1           1
           1          10          17           4           2           1
           1          10          18           1           2           1
           1          10          18           2           1           1
           1          10          18           3           1           1
           1          10          18           4           1           1
           1          10          19           1           1           1
           1          10          19           2           1           1
           1          10          19           3           1           1
           1          10          19           4           2           1
           1          10          20           1           1           1
           1          10          20           2           2           1
           1          10          20           3           1           1
           1          10          20           4           1           1
           1          10          21           1           2           1
           1          10          21           2           1           1
           1          10          21           3           1           1
           1          10          21           4           1           1
           1          10          22           1           1           1
           1          10          22           2           2           1
           1          10          22           3           1           1
           1          10          22           4           2           1
           1          10          23           1           1           1
           1          10          23           2           1           1
           1          10          23           3           1           1
           1          10          23           4           1           1
           1          10          24           1           1           1
           1          10          24           2           2           1
           1          10          24           3           1           1
           1          10          24           4           1           1
           1          10          25           1           1           1
           1          10          25           2           1           1
           1          10          25           3           1           1
           1          10          25           4           2           1
           1          10          26           1           1           1
           1          10          26           2           1           1
           1          10          26           3           1           1
           1          10          26           4           2           1
           1          10          27           1           1           1
           1          10          27           2           2           1
           1          10          27           3           1           1
           1          10          27           4           1           1
           1          10          28           1           1           1
           1          10          28           2           2           1
           1          10          28           3           1           1
           1          10          28           4           2           1
           1          10          29           1           1           1
           1          10          29           2           1           1
           1          10          29           3           1           1
           1          10          29           4           2           1
           1          10          30           1           1           1
           1          10          30           2           1           1
           1          10          30           3           1           1
           1          10          30           4           2           1
           1          10          31           1           1           1
           1          10          31           2           1           1
           1          10          31           3           1           1
           1          10          31           4           1           1
           1          10          32           1           2           1
           1          10          32           2           2           1
           1          10          32           3           2           1
           1          10          32           4           2           1
           1          11           1           1           1           1
           1          11           1           2           1           1
           1          11           1           3           2           1
           1          11           1           4           2           1
           1          11           2           1           1           1
           1          11           2           2           1           1
           1          11           2           3           1           1
           1          11           2           4           1           1
           1          11           3           1           2           1
           1          11           3           2           2           1
           1          11           3           3           2           1
           1          11           3           4           1           1
           1          11           4           1           1           1
           1          11           4           2           2           1
           1          11           4           3           1           1
           1          11           4           4           1           1
           1          11           5           1           2           1
           1          11           5           2           1           1
           1          11           5           3           1           1
           1          11           5           4           2           1
           1          11           6           1           1           1
           1          11           6           2           2           1
           1          11           6           3           1           1
           1          11           6           4           2           1
           1          11           7           1           1           1
           1          11           7           2           1           1
           1          11           7           3           2           1
           1          11           7           4           2           1
           1          11           8           1           1           1
           1          11           8           2           1           1
           1          11           8           3           1           1
           1          11           8           4           1           1
           1          11           9           1           1           1
           1          11           9           2           1           1
           1          11           9           3           1           1
           1          11           9           4           1           1
           1          11          10           1           1           1
           1          11          10           2           2           1
           1          11          10           3           1           1
           1          11          10           4           1           1
           1          11          11           1           1           1
           1          11          11           2           1           1
           1          11          11           3           2           1
           1          11          11           4           1           1
           1          11          12           1           1           1
           1          11          12           2           1           1
           1          11          12           3           1           1
           1          11          12           4           2           1
           1          11          13           1           1           1
           1          11          13           2           1           1
           1          11          13           3           1           1
           1          11          13           4           2           1
           1          11          14           1           1           1
           1          11          14           2           2           1
           1          11          14           3           1           1
           1          11          14           4           1           1
           1          11          15           1           1           1
           1          11          15           2           1           1
           1          11          15           3           1           1
           1          11          15           4           1           1
           1          11          16           1           1           1
           1          11          16           2           1           1
           1          11          16           3           1           1
           1          11          16           4           1           1
           1          11          17           1           1           1
           1          11          17           2           2           1
           1          11          17           3           1           1
           1          11          17           4           1           1
           1          11          18           1           2           1
           1          11          18           2           2           1
           1          11          18           3           2           1
           1          11          18           4           1           1
           1          11          19           1           1           1
           1          11          19           2           1           1
           1          11          19           3           1           1
           1          11          19           4           1           1
           1          11          20           1           1           1
           1          11          20           2           1           1
           1          11          20           3           1           1
           1          11          20           4           1           1
           1          11          21           1           1           1
           1          11          21           2           2           1
           1          11          21           3           2           1
           1          11          21           4           1           1
           1          11          22           1           1           1
           1          11          22           2           1           1
           1          11          22           3           1           1
           1          11          22           4           1           1
           1          11          23           1           2           1
           1          11          23           2           1           1
           1          11          23           3           2           1
           1          11          23           4           1           1
           1          11          24           1           2           1
           1          11          24           2           1           1
           1          11          24           3           2           1
           1          11          24           4           1           1
           1          11          25           1           1           1
           1          11          25           2           2           1
           1          11          25           3           2           1
           1          11          25           4           1           1
           1          11          26           1           1           1
           1          11          26           2           1           1
           1          11          26           3           1           1
           1          11          26           4           1           1
           1          11          27           1           2           1
           1          11          27           2           1           1
           1          11          27           3           1           1
           1          11          27           4           1           1
           1          11          28           1           1           1
           1          11          28           2           2           1
           1          11          28           3           2           1
           1          11          28           4           1           1
           1          11          29           1           2           1
           1          11          29           2           1           1
           1          11          29           3           1           1
           1          11          29           4           1           1
           1          11          30           1           1           1
           1          11          30           2           1           1
           1          11          30           3           1           1
           1          11          30           4           2           1
           1          11          31           1           2           1
           1          11          31           2           1           1
           1          11          31           3           1           1
           1          11          31           4           1           1
           1          11          32           1           2           1
           1          11          32           2           2           1
           1          11          32           3           1           1
           1          11          32           4           1           1
           1          12           1           1           1           1
           1          12           1           2           2           1
           1          12           1           3           2           1
           1          12           1           4           1           1
           1          12           2           1           2           1
           1          12           2           2           1           1
           1          12           2           3           1           1
           1          12           2           4           1           1
           1          12           3           1           2           1
           1          12           3           2           1           1
           1          12           3           3           1           1
           1          12           3           4           1           1
           1          12           4           1           2           1
           1          12           4           2           2           1
           1          12           4           3           1           1
           1          12           4           4           2           1
           1          12           5           1           2           1
           1          12           5           2           1           1
           1          12           5           3           1           1
           1          12           5           4           1           1
           1          12           6           1           1           1
           1          12           6           2           1           1
           1          12           6           3           1           1
           1          12           6           4           1           1
           1          12           7           1           1           1
           1          12           7           2           1           1
           1          12           7           3           1           1
           1          12           7           4           1           1
           1          12           8           1           2           1
           1          12           8           2           1           1
           1          12           8           3           2           1
           1          12           8           4           1           1
           1          12           9           1           1           1
           1          12           9           2           1           1
           1          12           9           3           1           1
           1          12           9           4           1           1
           1          12          10           1           1           1
           1          12          10           2           1           1
           1          12          10           3           1           1
           1          12          10           4           1           1
           1          12          11           1           1           1
           1          12          11           2           1           1
           1          12          11           3           2           1
           1          12          11           4           2           1
           1          12          12           1           2           1
           1          12          12           2           1           1
           1          12          12           3           1           1
           1          12          12           4           1           1
           1          12          13           1           1           1
           1          12          13           2           1           1
           1          12          13           3           2           1
           1          12          13           4           1           1
           1          12          14           1           1           1
           1          12          14           2           1           1
           1          12          14           3           1           1
           1          12          14           4           1           1
           1          12          15           1           2           1
           1          12          15           2           1           1
           1          12          15           3           1           1
           1          12          15           4           2           1
           1          12          16           1           1           1
           1          12          16           2           2           1
           1          12          16           3           1           1
           1          12          16           4           1           1
           1          12          17           1           2           1
           1          12          17           2           1           1
           1          12          17           3           1           1
           1          12          17           4           1           1
           1          12          18           1           2           1
           1          12          18           2           2           1
           1          12          18           3           2           1
           1          12          18           4           1           1
           1          12          19           1           1           1
           1          12          19           2           2           1
           1          12          19           3           2           1
           1          12          19           4           2           1
           1          12          20           1           1           1
           1          12          20           2           2           1
           1          12          20           3           1           1
           1          12          20           4           1           1
           1          12          21           1           1           1
           1          12          21           2           1           1
           1          12          21           3           1           1
           1          12          21           4           1           1
           1          12          22           1           2           1
           1          12          22           2           1           1
           1          12          22           3           1           1
           1          12          22           4           2           1
           1          12          23           1           2           1
           1          12          23           2           2           1
           1          12          23           3           1           1
           1          12          23           4           2           1
           1          12          24           1           1           1
           1          12          24           2           1           1
           1          12          24           3           1           1
           1          12          24           4           1           1
           1          12          25           1           1           1
           1          12          25           2           2           1
           1          12          25           3           2           1
           1          12          25           4           1           1
           1          12          26           1           1           1
           1          12          26           2           2           1
           1          12          26           3           1           1
           1          12          26           4           1           1
           1          12          27           1           1           1
           1          12          27           2           1           1
           1          12          27           3           2           1
           1          12          27           4           1           1
           1          12          28           1           1           1
           1          12          28           2           1           1
           1          12          28           3           2           1
           1          12          28           4           2           1
           1          12          29           1           1           1
           1          12          29           2           1           1
           1          12          29           3           2           1
           1          12          29           4           1           1
           1          12          30           1           2           1
           1          12          30           2           1           1
           1          12          30           3           2           1
           1          12          30           4           1           1
           1          12          31           1           1           1
           1          12          31           2           1           1
           1          12          31           3           2           1
           1          12          31           4           1           1
           1          12          32           1           1           1
           1          12          32           2           1           1
           1          12          32           3           2           1
           1          12          32           4           1           1
           1          13           1           1           1           1
           1          13           1           2           1           1
           1          13           1           3           1           1
           1          13           1           4           1           1
           1          13           2           1           2           1
           1          13           2           2           1           1
           1          13           2           3           1           1
           1          13           2           4           1           1
           1          13           3           1           1           1
           1          13           3           2           1           1
           1          13           3           3           1           1
           1          13           3           4           1           1
           1          13           4           1           2           1
           1          13           4           2           1           1
           1          13           4           3           1           1
           1          13           4           4           2           1
           1          13           5           1           2           1
           1          13           5           2           1           1
           1          13           5           3           1           1
           1          13           5           4           2           1
           1          13           6           1           1           1
           1          13           6           2           2           1
           1          13           6           3           1           1
           1          13           6           4           1           1
           1          13           7           1           1           1
           1          13           7           2           2           1
           1          13           7           3           1           1
           1          13           7           4           1           1
           1          13           8           1           2           1
           1          13           8           2           1           1
           1          13           8           3           2           1
           1          13           8           4           1           1
           1          13           9           1           1           1
           1          13           9           2           1           1
           1          13           9           3           1           1
           1          13           9           4           2           1
           1          13          10           1           2           1
           1          13          10           2           2           1
           1          13          10           3           2           1
           1          13          10           4           2           1
           1          13          11           1           1           1
           1          13          11           2           1           1
           1          13          11           3           1           1
           1          13          11           4           1           1
           1          13          12           1           1           1
           1          13          12           2           2           1
           1          13          12           3           1           1
           1          13          12           4           1           1
           1          13          13           1           2           1
           1          13          13           2           1           1
           1          13          13           3           1           1
           1          13          13           4           1           1
           1          13          14           1           1           1
           1          13          14           2           1           1
           1          13          14           3           2           1
           1          13          14           4           2           1
           1          13          15           1           1           1
           1          13          15           2           1           1
           1          13          15           3           1           1
           1          13          15           4           1           1
           1          13          16           1           1           1
           1          13          16           2           1           1
           1          13          16           3           2           1
           1          13          16           4           1           1
           1          13          17           1           2           1
           1          13          17           2           1           1
           1          13          17           3           2           1
           1          13          17           4           1           1
           1          13          18           1           2           1
           1          13          18           2           1           1
           1          13          18           3           1           1
           1          13          18           4           2           1
           1          13          19           1           1           1
           1          13          19           2           1           1
           1          13          19           3           1           1
           1          13          19           4           1           1
           1          13          20           1           1           1
           1          13          20           2           1           1
           1          13          20           3           1           1
           1          13          20           4           1           1
           1          13          21           1           1           1
           1          13          21           2           1           1
           1          13          21           3           2           1
           1          13          21           4           1           1
           1          13          22           1           1           1
           1          13          22           2           2           1
           1          13          22           3           1           1
           1          13          22           4           1           1
           1          13          23           1           2           1
           1          13          23           2           1           1
           1          13          23           3           1           1
           1          13          23           4           1           1
           1          13          24           1           1           1
           1          13          24           2           1           1
           1          13          24           3           1           1
           1          13          24           4           1           1
           1          13          25           1           1           1
           1          13          25           2           2           1
           1          13          25           3           1           1
           1          13          25           4           1           1
           1          13          26           1           1           1
           1          13          26           2           1           1
           1          13          26           3           2           1
           1          13          26           4           1           1
           1          13          27           1           2           1
           1          13          27           2           1           1
           1          13          27           3           1           1
           1          13          27           4           2           1
           1          13          28           1           1           1
           1          13          28           2           2           1
           1          13          28           3           1           1
           1          13          28           4           2           1
           1          13          29           1           1           1
           1          13          29           2           2           1
           1          13          29           3           1           1
           1          13          29           4           1           1
           1          13          30           1           1           1
           1          13          30           2           1           1
           1          13          30           3           1           1
           1          13          30           4           2           1
           1          13          31           1           2           1
           1          13          31           2           1           1
           1          13          31           3           1           1
           1          13          31           4           2           1
           1          13          32           1           1           1
           1          13          32           2           1           1
           1          13          32           3           2           1
           1          13          32           4           1           1
           1          14           1           1           1           1
           1          14           1           2           1           1
           1          14           1           3           1           1
           1          14           1           4           2           1
           1          14           2           1           1           1
           1          14           2           2           2           1
           1          14           2           3           1           1
           1          14           2           4           1           1
           1          14           3           1           1           1
           1          14           3           2           2           1
           1          14           3           3           1           1
           1          14           3           4           1           1
           1          14           4           1           1           1
           1          14           4           2           2           1
           1          14           4           3           1           1
           1          14           4           4           2           1
           1          14           5           1           1           1
           1          14           5           2           2           1
           1          14           5           3           2           1
           1          14           5           4           2           1
           1          14           6           1           1           1
           1          14           6           2           1           1
           1          14           6           3           1           1
           1          14           6           4           2           1
           1          14           7           1           1           1
           1          14           7           2           1           1
           1          14           7           3           1           1
           1          14           7           4           2           1
           1          14           8           1           1           1
           1          14           8           2           1           1
           1          14           8           3           1           1
           1          14           8           4           2           1
           1          14           9           1           1           1
           1          14           9           2           1           1
           1          14           9           3           1           1
           1          14           9           4           1           1
           1          14          10           1           1           1
           1          14          10           2           1           1
           1          14          10           3           2           1
           1          14          10           4           1           1
           1          14          11           1           1           1
           1          14          11           2           2           1
           1          14          11           3           1           1
           1          14          11           4           1           1
           1          14          12           1           2           1
           1          14          12           2           1           1
           1          14          12           3           1           1
           1          14          12           4           1           1
           1          14          13           1           2           1
           1          14          13           2           1           1
           1          14          13           3           1           1
           1          14          13           4           2           1
           1          14          14           1           1           1
           1          14          14           2           1           1
           1          14          14           3           1           1
           1          14          14           4           1           1
           1          14          15           1           2           1
           1          14          15           2           2           1
           1          14          15           3           1           1
           1          14          15           4           1           1
           1          14          16           1           2           1
           1          14          16           2           2           1
           1          14          16           3           1           1
           1          14          16           4           2           1
           1          14          17           1           1           1
           1          14          17           2           1           1
           1          14          17           3           1           1
           1          14          17           4           1           1
           1          14          18           1           2           1
           1          14          18           2           1           1
           1          14          18           3           1           1
           1          14          18           4           2           1
           1          14          19           1           1           1
           1          14          19           2           2           1
           1          14          19           3           1           1
           1          14          19           4           1           1
           1          14          20           1           1           1
           1          14          20           2           1           1
           1          14          20           3           1           1
           1          14          20           4           1           1
           1          14          21           1           2           1
           1          14          21           2           2           1
           1          14          21           3           2           1
           1          14          21           4           1           1
           1          14          22           1           1           1
           1          14          22           2           2           1
           1          14          22           3           1           1
           1          14          22           4           1           1
           1          14          23           1           1           1
           1          14          23           2           1           1
           1          14          23           3           2           1
           1          14          23           4           1           1
           1          14          24           1           1           1
           1          14          24           2           1           1
           1          14          24           3           2           1
           1          14          24           4           1           1
           1          14          25           1           1           1
           1          14          25           2           2           1
           1          14          25           3           2           1
           1          14          25           4           1           1
           1          14          26           1           1           1
           1          14          26           2           1           1
           1          14          26           3           2           1
           1          14          26           4           1           1
           1          14          27           1           1           1
           1          14          27           2           1           1
           1          14          27           3           1           1
           1          14          27           4           1           1
           1          14          28           1           2           1
           1          14          28           2           2           1
           1          14          28           3           1           1
           1          14          28           4           1           1
           1          14          29           1           1           1
           1          14          29           2           1           1
           1          14          29           3           2           1
           1          14          29           4           1           1
           1          14          30           1           1           1
           1          14          30           2           2           1
           1          14          30           3           1           1
           1          14          30           4           2           1
           1          14          31           1           1           1
           1          14          31           2           2           1
           1          14          31           3           2           1
           1          14          31           4           1           1
           1          14          32           1           1           1
           1          14          32           2           1           1
           1          14          32           3           1           1
           1          14          32           4           2           1
           1          15           1           1           1           1
           1          15           1           2           1           1
           1          15           1           3           2           1
           1          15           1           4           1           1
           1          15           2           1           1           1
           1          15           2           2           1           1
           1          15           2           3           1           1
           1          15           2           4           1           1
           1          15           3           1           2           1
           1          15           3           2           1           1
           1          15           3           3           1           1
           1          15           3           4           1           1
           1          15           4           1           1           1
           1          15           4           2           2           1
           1          15           4           3           1           1
           1          15           4           4           1           1
           1          15           5           1           1           1
           1          15           5           2           2           1
           1          15           5           3           2           1
           1          15           5           4           1           1
           1          15           6           1           1           1
           1          15           6           2           1           1
           1          15           6           3           1           1
           1          15           6           4           1           1
           1          15           7           1           2           1
           1          15           7           2           1           1
           1          15           7           3           2           1
           1          15           7           4           1           1
           1          15           8           1           2           1
           1          15           8           2           1           1
           1          15           8           3           1           1
           1          15           8           4           1           1
           1          15           9           1           1           1
           1          15           9           2           1           1
           1          15           9           3           1           1
           1          15           9           4           2           1
           1          15          10           1           1           1
           1          15          10           2           1           1
           1          15          10           3           2           1
           1          15          10           4           2           1
           1          15          11           1           1           1
           1          15          11           2           2           1
           1          15          11           3           1           1
           1          15          11           4           1           1
           1          15          12           1           1           1
           1          15          12           2           1           1
           1          15          12           3           1           1
           1          15          12           4           1           1
           1          15          13           1           1           1
           1          15          13           2           1           1
           1          15          13           3           1           1
           1          15          13           4           2           1
           1          15          14           1           1           1
           1          15          14           2           1           1
           1          15          14           3           2           1
           1          15          14           4           1           1
           1          15          15           1           2           1
           1          15          15           2           1           1
           1          15          15           3           1           1
           1          15          15           4           1           1
           1          15          16           1           1           1
           1          15          16           2           1           1
           1          15          16           3           1           1
           1          15          16           4           2           1
           1          15          17           1           1           1
           1          15          17           2           1           1
           1          15          17           3           1           1
           1          15          17           4           2           1
           1          15          18           1           2           1
           1          15          18           2           1           1
           1          15          18           3           1           1
           1          15          18           4           1           1
           1          15          19           1           1           1
           1          15          19           2           1           1
           1          15          19           3           1           1
           1          15          19           4           1           1
           1          15          20           1           1           1
           1          15          20           2           1           1
           1          15          20           3           2           1
           1          15          20           4           1           1
           1          15          21           1           1           1
           1          15          21           2           1           1
           1          15          21           3           1           1
           1          15          21           4           1           1
           1          15          22           1           1           1
           1          15          22           2           2           1
           1          15          22           3           2           1
           1          15          22           4           1           1
           1          15          23           1           1           1
           1          15          23           2           1           1
           1          15          23           3           1           1
           1          15          23           4           1           1
           1          15          24           1           2           1
           1          15          24           2           1           1
           1          15          24           3           1           1
           1          15          24           4           2           1
           1          15          25           1           1           1
           1          15          25           2           1           1
           1          15          25           3           2           1
           1          15          25           4           2           1
           1          15          26           1           1           1
           1          15          26           2           1           1
           1          15          26           3           2           1
           1          15          26           4           1           1
           1          15          27           1           2           1
           1          15          27           2           1           1
           1          15          27           3           1           1
           1          15          27           4           1           1
           1          15          28           1           1           1
           1          15          28           2           1           1
           1          15          28           3           2           1
           1          15          28           4           1           1
           1          15          29           1           1           1
           1          15          29           2           2           1
           1          15          29           3           2           1
           1          15          29           4           1           1
           1          15          30           1           1           1
           1          15          30           2           1           1
           1          15          30           3           2           1
           1          15          30           4           1           1
           1          15          31           1           1           1
           1          15          31           2           1           1
           1          15          31           3           2           1
           1          15          31           4           1           1
           1          15          32           1           1           1
           1          15          32           2           1           1
           1          15          32           3           1           1
           1          15          32           4           1           1
           1          16           1           1           1           1
           1          16           1           2           1           1
           1          16           1           3           1           1
           1          16           1           4           1           1
           1          16           2           1           1           1
           1          16           2           2           1           1
           1          16           2           3           1           1
           1          16           2           4           1           1
           1          16           3           1           2           1
           1          16           3           2           2           1
           1          16           3           3           1           1
           1          16           3           4           1           1
           1          16           4           1           1           1
           1          16           4           2           1           1
           1          16           4           3           1           1
           1          16           4           4           2           1
           1          16           5           1           1           1
           1          16           5           2           1           1
           1          16           5           3           1           1
           1          16           5           4           1           1
           1          16           6           1           1           1
           1          16           6           2           2           1
           1          16           6           3           1           1
           1          16           6           4           1           1
           1          16           7           1           1           1
           1          16           7           2           1           1
           1          16           7           3           1           1
           1          16           7           4           1           1
           1          16           8           1           2           1
           1          16           8           2           1           1
           1          16           8           3           1           1
           1          16           8           4           2           1
           1          16           9           1           1           1
           1          16           9           2           1           1
           1          16           9           3           1           1
           1          16           9           4           1           1
           1          16          10           1           1           1
           1          16          10           2           2           1
           1          16          10           3           1           1
           1          16          10           4           1           1
           1          16          11           1           1           1
           1          16          11           2           2           1
           1          16          11           3           1           1
           1          16          11           4           1           1
           1          16          12           1           2           1
           1          16          12           2           2           1
           1          16          12           3           1           1
           1          16          12           4           1           1
           1          16          13           1           2           1
           1          16          13           2           2           1
           1          16          13           3           2           1
           1          16          13           4           1           1
           1          16          14           1           1           1
           1          16          14           2           1           1
           1          16          14           3           1           1
           1          16          14           4           1           1
           1          16          15           1           1           1
           1          16          15           2           1           1
           1          16          15           3           1           1
           1          16          15           4           1           1
           1          16          16           1           2           1
           1          16          16           2           1           1
           1          16          16           3           2           1
           1          16          16           4           1           1
           1          16          17           1           2           1
           1          16          17           2           1           1
           1          16          17           3           2           1
           1          16          17           4           1           1
           1          16          18           1           1           1
           1          16          18           2           1           1
           1          16          18           3           2           1
           1          16          18           4           1           1
           1          16          19           1           1           1
           1          16          19           2           1           1
           1          16          19           3           1           1
           1          16          19           4           1           1
           1          16          20           1           2           1
           1          16          20           2           2           1
           1          16          20           3           1           1
           1          16          20           4           2           1
           1          16          21           1           2           1
           1          16          21           2           1           1
           1          16          21           3           1           1
           1          16          21           4           2           1
           1          16          22           1           1           1
           1          16          22           2           1           1
           1          16          22           3           1           1
           1          16          22           4           2           1
           1          16          23           1           1           1
           1          16          23           2           1           1
           1          16          23           3           1           1
           1          16          23           4           1           1
           1          16          24           1           1           1
           1          16          24           2           1           1
           1          16          24           3           2           1
           1          16          24           4           1           1
           1          16          25           1           1           1
           1          16          25           2           1           1
           1          16          25           3           2           1
           1          16          25           4           2           1
           1          16          26           1           1           1
           1          16          26           2           1           1
           1          16          26           3           1           1
           1          16          26           4           2           1
           1          16          27           1           1           1
           1          16          27           2           1           1
           1          16          27           3           1           1
           1          16          27           4           1           1
           1          16          28           1           1           1
           1          16          28           2           1           1
           1          16          28           3           1           1
           1          16          28           4           2           1
           1          16          29           1           1           1
           1          16          29           2           1           1
           1          16          29           3           2           1
           1          16          29           4           1           1
           1          16          30           1           1           1
           1          16          30           2           1           1
           1          16          30           3           2           1
           1          16          30           4           1           1
           1          16          31           1           1           1
           1          16          31           2           1           1
           1          16          31           3           1           1
           1          16          31           4           1           1
           1          16          32           1           1           1
           1          16          32           2           1           1
           1          16          32           3           1           1
           1          16          32           4           2           1
           1          17           1           1           1           1
           1          17           1           2           2           1
           1          17           1           3           1           1
           1          17           1           4           1           1
           1          17           2           1           1           1
           1          17           2           2           2           1
           1          17           2           3           1           1
           1          17           2           4           2           1
           1          17           3           1           2           1
           1          17           3           2           2           1
           1          17           3           3           1           1
           1          17           3           4           1           1
           1          17           4           1           2           1
           1          17           4           2           2           1
           1          17           4           3           1           1
           1          17           4           4           1           1
           1          17           5           1           1           1
           1          17           5           2           1           1
           1          17           5           3           2           1
           1          17           5           4           2           1
           1          17           6           1           2           1
           1          17           6           2           1           1
           1          17           6           3           1           1
           1          17           6           4           1           1
           1          17           7           1           1           1
           1          17           7           2           2           1
           1          17           7           3           2           1
           1          17           7           4           1           1
           1          17           8           1           1           1
           1          17           8           2           1           1
           1          17           8           3           1           1
           1          17           8           4           1           1
           1          17           9           1           1           1
           1          17           9           2           2           1
           1          17           9           3           1           1
           1          17           9           4           2           1
           1          17          10           1           1           1
           1          17          10           2           1           1
           1          17          10           3           2           1
           1          17          10           4           2           1
           1          17          11           1           1           1
           1          17          11           2           1           1
           1          17          11           3           1           1
           1          17          11           4           1           1
           1          17          12           1           1           1
           1          17          12           2           1           1
           1          17          12           3           2           1
           1          17          12           4           1           1
           1          17          13           1           2           1
           1          17          13           2           1           1
           1          17          13           3           1           1
           1          17          13           4           2           1
           1          17          14           1           2           1
           1          17          14           2           2           1
           1          17          14           3           1           1
           1          17          14           4           1           1
           1          17          15           1           1           1
           1          17          15           2           1           1
           1          17          15           3           1           1
           1          17          15           4           1           1
           1          17          16           1           1           1
           1          17          16           2           1           1
           1          17          16           3           1           1
           1          17          16           4           2           1
           1          17          17           1           1           1
           1          17          17           2           1           1
           1          17          17           3           2           1
           1          17          17           4           1           1
           1          17          18           1           2           1
           1          17          18           2           2           1
           1          17          18           3           1           1
           1          17          18           4           1           1
           1          17          19           1           1           1
           1          17          19           2           1           1
           1          17          19           3           1           1
           1          17          19           4           2           1
           1          17          20           1           1           1
           1          17          20           2           1           1
           1          17          20           3           1           1
           1          17          20           4           1           1
           1          17          21           1           1           1
           1          17          21           2           1           1
           1          17          21           3           1           1
           1          17          21           4           2           1
           1          17          22           1           1           1
           1          17          22           2           1           1
           1          17          22           3           1           1
           1          17          22           4           1           1
           1          17          23           1           1           1
           1          17          23           2           2           1
           1          17          23           3           1           1
           1          17          23           4           1           1
           1          17          24           1           1           1
           1          17          24           2           1           1
           1          17          24           3           1           1
           1          17          24           4           1           1
           1          17          25           1           1           1
           1          17          25           2           1           1
           1          17          25           3           2           1
           1          17          25           4           2           1
           1          17          26           1           1           1
           1          17          26           2           1           1
           1          17          26           3           1           1
           1          17          26           4           2           1
           1          17          27           1           1           1
           1          17          27           2           2           1
           1          17          27           3           2           1
           1          17          27           4           2           1
           1          17          28           1           1           1
           1          17          28           2           2           1
           1          17          28           3           2           1
           1          17          28           4           2           1
           1          17          29           1           2           1
           1          17          29           2           1           1
           1          17          29           3           1           1
           1          17          29           4           1           1
           1          17          30           1           1           1
           1          17          30           2           1           1
           1          17          30           3           2           1
           1          17          30           4           1           1
           1          17          31           1           1           1
           1          17          31           2           1           1
           1          17          31           3           1           1
           1          17          31           4           1           1
           1          17          32           1           2           1
           1          17          32           2           1           1
           1          17          32           3           1           1
           1          17          32           4           1           1
           1          18           1           1           2           1
           1          18           1           2           2           1
           1          18           1           3           1           1
           1          18           1           4           2           1
           1          18           2           1           1           1
           1          18           2           2           2           1
           1          18           2           3           1           1
           1          18           2           4           1           1
           1          18           3           1           2           1
           1          18           3           2           1           1
           1          18           3           3           1           1
           1          18           3           4           1           1
           1          18           4           1           1           1
           1          18           4           2           1           1
           1          18           4           3           1           1
           1          18           4           4           1           1
           1          18           5           1           1           1
           1          18           5           2           1           1
           1          18           5           3           2           1
           1          18           5           4           1           1
           1          18           6           1           1           1
           1          18           6           2           1           1
           1          18           6           3           1           1
           1          18           6           4           1           1
           1          18           7           1           1           1
           1          18           7           2           2           1
           1          18           7           3           2           1
           1          18           7           4           1           1
           1          18           8           1           2           1
           1          18           8           2           1           1
           1          18           8           3           2           1
           1          18           8           4           1           1
           1          18           9           1           2           1
           1          18           9           2           2           1
           1          18           9           3           1           1
           1          18           9           4           1           1
           1          18          10           1           1           1
           1          18          10           2           1           1
           1          18          10           3           1           1
           1          18          10           4           1           1
           1          18          11           1           1           1
           1          18          11           2           2           1
           1          18          11           3           1           1
           1          18          11           4           2           1
           1          18          12           1           2           1
           1          18          12           2           1           1
           1          18          12           3           2           1
           1          18          12           4           1           1
           1          18          13           1           2           1
           1          18          13           2           1           1
           1          18          13           3           1           1
           1          18          13           4           1           1
           1          18          14           1           2           1
           1          18          14           2           2           1
           1          18          14           3           1           1
           1          18          14           4           2           1
           1          18          15           1           2           1
           1          18          15           2           1           1
           1          18          15           3           1           1
           1          18          15           4           2           1
           1          18          16           1           2           1
           1          18          16           2           2           1
           1          18          16           3           1           1
           1          18          16           4           2           1
           1          18          17           1           2           1
           1          18          17           2           1           1
           1          18          17           3           2           1
           1          18          17           4           1           1
           1          18          18           1           1           1
           1          18          18           2           1           1
           1          18          18           3           1           1
           1          18          18           4           2           1
           1          18          19           1           1           1
           1          18          19           2           1           1
           1          18          19           3           1           1
           1          18          19           4           1           1
           1          18          20           1           1           1
           1          18          20           2           1           1
           1          18          20           3           1           1
           1          18          20           4           2           1
           1          18          21           1           1           1
           1          18          21           2           2           1
           1          18          21           3           1           1
           1          18          21           4           1           1
           1          18          22           1           1           1
           1          18          22           2           1           1
           1          18          22           3           2           1
           1          18          22           4           1           1
           1          18          23           1           2           1
           1          18          23           2           1           1
           1          18          23           3           1           1
           1          18          23           4           1           1
           1          18          24           1           1           1
           1          18          24           2           1           1
           1          18          24           3           2           1
           1          18          24           4           1           1
           1          18          25           1           1           1
           1          18          25           2           1           1
           1          18          25           3           1           1
           1          18          25           4           1           1
           1          18          26           1           1           1
           1          18          26           2           1           1
           1          18          26           3           1           1
           1          18          26           4           1           1
           1          18          27           1           1           1
           1          18          27           2           2           1
           1          18          27           3           2           1
           1          18          27           4           1           1
           1          18          28           1           1           1
           1          18          28           2           2           1
           1          18          28           3           1           1
           1          18          28           4           1           1
           1          18          29           1           1           1
           1          18          29           2           1           1
           1          18          29           3           1           1
           1          18          29           4           2           1
           1          18          30           1           1           1
           1          18          30           2           1           1
           1          18          30           3           1           1
           1          18          30           4           1           1
           1          18          31           1           1           1
           1          18          31           2           1           1
           1          18          31           3           1           1
           1          18          31           4           1           1
           1          18          32           1           2           1
           1          18          32           2           1           1
           1          18          32           3           1           1
           1          18          32           4           1           1
           1          19           1           1           1           1
           1          19           1           2           1           1
           1          19           1           3           1           1
           1          19           1           4           1           1
           1          19           2           1           1           1
           1          19           2           2           1           1
           1          19           2           3           1           1
           1          19           2           4           1           1
           1          19           3           1           1           1
           1          19           3           2           1           1
           1          19           3           3           2           1
           1          19           3           4           1           1
           1          19           4           1           2           1
           1          19           4           2           1           1
           1          19           4           3           1           1
           1          19           4           4           1           1
           1          19           5           1           2           1
           1          19           5           2           1           1
           1          19           5           3           2           1
           1          19           5           4           1           1
           1          19           6           1           2           1
           1          19           6           2           1           1
           1          19           6           3           1           1
           1          19           6           4           2           1
           1          19           7           1           1           1
           1          19           7           2           1           1
           1          19           7           3           1           1
           1          19           7           4           1           1
           1          19           8           1           2           1
           1          19           8           2           1           1
           1          19           8           3           1           1
           1          19           8           4           1           1
           1          19           9           1           2           1
           1          19           9           2           2           1
           1          19           9           3           2           1
           1          19           9           4           2           1
           1          19          10           1           1           1
           1          19          10           2           1           1
           1          19          10           3           2           1
           1          19          10           4           1           1
           1          19          11           1           1           1
           1          19          11           2           1           1
           1          19          11           3           1           1
           1          19          11           4           1           1
           1          19          12           1           2           1
           1          19          12           2           1           1
           1          19          12           3           2           1
           1          19          12           4           1           1
           1          19          13           1           2           1
           1          19          13           2           2           1
           1          19          13           3           2           1
           1          19          13           4           2           1
           1          19          14           1           2           1
           1          19          14           2           1           1
           1          19          14           3           1           1
           1          19          14           4           1           1
           1          19          15           1           1           1
           1          19          15           2           2           1
           1          19          15           3           1           1
           1          19          15           4           2           1
           1          19          16           1           2           1
           1          19          16           2           1           1
           1          19          16           3           1           1
           1          19          16           4           1           1
           1          19          17           1           2           1
           1          19          17           2           1           1
           1          19          17           3           2           1
           1          19          17           4           2           1
           1          19          18           1           1           1
           1          19          18           2           2           1
           1          19          18           3           2           1
           1          19          18           4           2           1
           1          19          19           1           1           1
           1          19          19           2           1           1
           1          19          19           3           2           1
           1          19          19           4           1           1
           1          19          20           1           1           1
           1          19          20           2           2           1
           1          19          20           3           2           1
           1          19          20           4           1           1
           1          19          21           1           1           1
           1          19          21           2           1           1
           1          19          21           3           1           1
           1          19          21           4           1           1
           1          19          22           1           1           1
           1          19          22           2           2           1
           1          19          22           3           2           1
           1          19          22           4           2           1
           1          19          23           1           1           1
           1          19          23           2           1           1
           1          19          23           3           1           1
           1          19          23           4           1           1
           1          19          24           1           1           1
           1          19          24           2           1           1
           1          19          24           3           1           1
           1          19          24           4           2           1
           1          19          25           1           1           1
           1          19          25           2           1           1
           1          19          25           3           1           1
           1          19          25           4           1           1
           1          19          26           1           2           1
           1          19          26           2           1           1
           1          19          26           3           1           1
           1          19          26           4           2           1
           1          19          27           1           2           1
           1          19          27           2           1           1
           1          19          27           3           1           1
           1          19          27           4           2           1
           1          19          28           1           1           1
           1          19          28           2           1           1
           1          19          28           3           2           1
           1          19          28           4           1           1
           1          19          29           1           2           1
           1          19          29           2           1           1
           1          19          29           3           1           1
           1          19          29           4           2           1
           1          19          30           1           1           1
           1          19          30           2           1           1
           1          19          30           3           2           1
           1          19          30           4           1           1
           1          19          31           1           2           1
           1          19          31           2           1           1
           1          19          31           3           1           1
           1          19          31           4           1           1
           1          19          32           1           2           1
           1          19          32           2           2           1
           1          19          32           3           2           1
           1          19          32           4           1           1
           1          20           1           1           1           1
           1          20           1           2           1           1
           1          20           1           3           1           1
           1          20           1           4           1           1
           1          20           2           1           2           1
           1          20           2           2           1           1
           1          20           2           3           1           1
           1          20           2           4           1           1
           1          20           3           1           1           1
           1          20           3           2           2           1
           1          20           3           3           1           1
           1          20           3           4           1           1
           1          20           4           1           1           1
           1          20           4           2           1           1
           1          20           4           3           1           1
           1          20           4           4           1           1
           1          20           5           1           2           1
           1          20           5           2           2           1
           1          20           5           3           1           1
           1          20           5           4           1           1
           1          20           6           1           2           1
           1          20           6           2           2           1
           1          20           6           3           1           1
           1          20           6           4           1           1
           1          20           7           1           1           1
           1          20           7           2           1           1
           1          20           7           3           1           1
           1          20           7           4           1           1
           1          20           8           1           2           1
           1          20           8           2           1           1
           1          20           8           3           1           1
           1          20           8           4           2           1
           1          20           9           1           1           1
           1          20           9           2           1           1
           1          20           9           3           1           1
           1          20           9           4           1           1
           1          20          10           1           1           1
           1          20          10           2           1           1
           1          20          10           3           2           1
           1          20          10           4           1           1
           1          20          11           1           1           1
           1          20          11           2           2           1
           1          20          11           3           1           1
           1          20          11           4           2           1
           1          20          12           1           2           1
           1          20          12           2           1           1
           1          20          12           3           1           1
           1          20          12           4           2           1
           1          20          13           1           2           1
           1          20          13           2           2           1
           1          20          13           3           1           1
           1          20          13           4           2           1
           1          20          14           1           1           1
           1          20          14           2           1           1
           1          20          14           3           1           1
           1          20          14           4           1           1
           1          20          15           1           2           1
           1          20          15           2           1           1
           1          20          15           3           1           1
           1          20          15           4           1           1
           1          20          16           1           2           1
           1          20          16           2           1           1
           1          20          16           3           2           1
           1          20          16           4           1           1
           1          20          17           1           1           1
           1          20          17           2           1           1
           1          20          17           3           1           1
           1          20          17           4           1           1
           1          20          18           1           2           1
           1          20          18           2           2           1
           1          20          18           3           2           1
           1          20          18           4           2           1
           1          20          19           1           1           1
           1          20          19           2           2           1
           1          20          19           3           2           1
           1          20          19           4           1           1
           1          20          20           1           1           1
           1          20          20           2           1           1
           1          20          20           3           2           1
           1          20          20           4           1           1
           1          20          21           1           1           1
           1          20          21           2           2           1
           1          20          21           3           2           1
           1          20          21           4           2           1
           1          20          22           1           2           1
           1          20          22           2           1           1
           1          20          22           3           1           1
           1          20          22           4           1           1
           1          20          23           1           1           1
           1          20          23           2           1           1
           1          20          23           3           1           1
           1          20          23           4           1           1
           1          20          24           1           1           1
           1          20          24           2           2           1
           1          20          24           3           2           1
           1          20          24           4           1           1
           1          20          25           1           1           1
           1          20          25           2           1           1
           1          20          25           3           1           1
           1          20          25           4           1           1
           1          20          26           1           2           1
           1          20          26           2           1           1
           1          20          26           3           1           1
           1          20          26           4           1           1
           1          20          27           1           1           1
           1          20          27           2           1           1
           1          20          27           3           2           1
           1          20          27           4           1           1
           1          20          28           1           1           1
           1          20          28           2           1           1
           1          20          28           3           1           1
           1          20          28           4           1           1
           1          20          29           1           2           1
           1          20          29           2           1           1
           1          20          29           3           1           1
           1          20          29           4           2           1
           1          20          30           1           1           1
           1          20          30           2           1           1
           1          20          30           3           1           1
           1          20          30           4           2           1
           1          20          31           1           2           1
           1          20          31           2           1           1
           1          20          31           3           2           1
           1          20          31           4           2           1
           1          20          32           1           1           1
           1          20          32           2           1           1
           1          20          32           3           2           1
           1          20          32           4           2           1
           1          21           1           1           1           1
           1          21           1           2           2           1
           1          21           1           3           1           1
           1          21           1           4           1           1
           1          21           2           1           1           1
           1          21           2           2           1           1
           1          21           2           3           1           1
           1          21           2           4           2           1
           1          21           3           1           1           1
           1          21           3           2           1           1
           1          21           3           3           2           1
           1          21           3           4           1           1
           1          21           4           1           2           1
           1          21           4           2           1           1
           1          21           4           3           1           1
           1          21           4           4           2           1
           1          21           5           1           1           1
           1          21           5           2           1           1
           1          21           5           3           1           1
           1          21           5           4           2           1
           1          21           6           1           1           1
           1          21           6           2           1           1
           1          21           6           3           1           1
           1          21           6           4           1           1
           1          21           7           1           1           1
           1          21           7           2           1           1
           1          21           7           3           1           1
           1          21           7           4           1           1
           1          21           8           1           2           1
           1          21           8           2           2           1
           1          21           8           3           2           1
           1          21           8           4           2           1
           1          21           9           1           1           1
           1          21           9           2           1           1
           1          21           9           3           1           1
           1          21           9           4           1           1
           1          21          10           1           1           1
           1          21          10           2           1           1
           1          21          10           3           1           1
           1          21          10           4           2           1
           1          21          11           1           1           1
           1          21          11           2           1           1
           1          21          11           3           2           1
           1          21          11           4           1           1
           1          21          12           1           2           1
           1          21          12           2           1           1
           1          21          12           3           1           1
           1          21          12           4           1           1
           1          21          13           1           2           1
           1          21          13           2           2           1
           1          21          13           3           1           1
           1          21          13           4           2           1
           1          21          14           1           1           1
           1          21          14           2           1           1
           1          21          14           3           2           1
           1          21          14           4           1           1
           1          21          15           1           2           1
           1          21          15           2           1           1
           1          21          15           3           1           1
           1          21          15           4           1           1
           1          21          16           1           1           1
           1          21          16           2           1           1
           1          21          16           3           2           1
           1          21          16           4           1           1
           1          21          17           1           1           1
           1          21          17           2           1           1
           1          21          17           3           1           1
           1          21          17           4           1           1
           1          21          18           1           1           1
           1          21          18           2           1           1
           1          21          18           3           1           1
           1          21          18           4           1           1
           1          21          19           1           2           1
           1          21          19           2           2           1
           1          21          19           3           2           1
           1          21          19           4           1           1
           1          21          20           1           1           1
           1          21          20           2           1           1
           1          21          20           3           2           1
           1          21          20           4           1           1
           1          21          21           1           1           1
           1          21          21           2           1           1
           1          21          21           3           1           1
           1          21          21           4           1           1
           1          21          22           1           1           1
           1          21          22           2           1           1
           1          21          22           3           1           1
           1          21          22           4           2           1
           1          21          23           1           1           1
           1          21          23           2           1           1
           1          21          23           3           1           1
           1          21          23           4           1           1
           1          21          24           1           1           1
           1          21          24           2           2           1
           1          21          24           3           1           1
           1          21          24           4           1           1
           1          21          25           1           1           1
           1          21          25           2           1           1
           1          21          25           3           1           1
           1          21          25           4           1           1
           1          21          26           1           1           1
           1          21          26           2           1           1
           1          21          26           3           1           1
           1          21          26           4           1           1
           1          21          27           1           1           1
           1          21          27           2           1           1
           1          21          27           3           1           1
           1          21          27           4           1           1
           1          21          28           1           1           1
           1          21          28           2           1           1
           1          21          28           3           1           1
           1          21          28           4           1           1
           1          21          29           1           2           1
           1          21          29           2           1           1
           1          21          29           3           1           1
           1          21          29           4           1           1
           1          21          30           1           2           1
           1          21          30           2           1           1
           1          21          30           3           1           1
           1          21          30           4           2           1
           1          21          31           1           2           1
           1          21          31           2           1           1
           1          21          31           3           1           1
           1          21          31           4           2           1
           1          21          32           1           1           1
           1          21          32           2           1           1
           1          21          32           3           1           1
           1          21          32           4           1           1
           1          22           1           1           1           1
           1          22           1           2           1           1
           1          22           1           3           1           1
           1          22           1           4           2           1
           1          22           2           1           1           1
           1          22           2           2           1           1
           1          22           2           3           2           1
           1          22           2           4           1           1
           1          22           3           1           1           1
           1          22           3           2           1           1
           1          22           3           3           1           1
           1          22           3           4           2           1
           1          22           4           1           2           1
           1          22           4           2           2           1
           1          22           4           3           1           1
           1          22           4           4           2           1
           1          22           5           1           1           1
           1          22           5           2           2           1
           1          22           5           3           1           1
           1          22           5           4           1           1
           1          22           6           1           2           1
           1          22           6           2           1           1
           1          22           6           3           2           1
           1          22           6           4           1           1
           1          22           7           1           2           1
           1          22           7           2           1           1
           1          22           7           3           2           1
           1          22           7           4           2           1
           1          22           8           1           2           1
           1          22           8           2           2           1
           1          22           8           3           1           1
           1          22           8           4           1           1
           1          22           9           1           2           1
           1          22           9           2           1           1
           1          22           9           3           1           1
           1          22           9           4           2           1
           1          22          10           1           2           1
           1          22          10           2           1           1
           1          22          10           3           1           1
           1          22          10           4           1           1
           1          22          11           1           1           1
           1          22          11           2           2           1
           1          22          11           3           1           1
           1          22          11           4           1           1
           1          22          12           1           1           1
           1          22          12           2           1           1
           1          22          12           3           1           1
           1          22          12           4           1           1
           1          22          13           1           2           1
           1          22          13           2           2           1
           1          22          13           3           2           1
           1          22          13           4           2           1
           1          22          14           1           1           1
           1          22          14           2           1           1
           1          22          14           3           1           1
           1          22          14           4           1           1
           1          22          15           1           1           1
           1          22          15           2           2           1
           1          22          15           3           1           1
           1          22          15           4           1           1
           1          22          16           1           1           1
           1          22          16           2           1           1
           1          22          16           3           1           1
           1          22          16           4           2           1
           1          22          17           1           1           1
           1          22          17           2           1           1
           1          22          17           3           2           1
           1          22          17           4           1           1
           1          22          18           1           2           1
           1          22          18           2           1           1
           1          22          18           3           1           1
           1          22          18           4           1           1
           1          22          19           1           1           1
           1          22          19           2           1           1
           1          22          19           3           1           1
           1          22          19           4           1           1
           1          22          20           1           1           1
           1          22          20           2           1           1
           1          22          20           3           1           1
           1          22          20           4           1           1
           1          22          21           1           2           1
           1          22          21           2           1           1
           1          22          21           3           1           1
           1          22          21           4           1           1
           1          22          22           1           2           1
           1          22          22           2           1           1
           1          22          22           3           1           1
           1          22          22           4           1           1
           1          22          23           1           1           1
           1          22          23           2           1           1
           1          22          23           3           1           1
           1          22          23           4           1           1
           1          22          24           1           1           1
           1          22          24           2           2           1
           1          22          24           3           2           1
           1          22          24           4           1           1
           1          22          25           1           2           1
           1          22          25           2           1           1
           1          22          25           3           1           1
           1          22          25           4           2           1
           1          22          26           1           1           1
           1          22          26           2           1           1
           1          22          26           3           1           1
           1          22          26           4           1           1
           1          22          27           1           2           1
           1          22          27           2           1           1
           1          22          27           3           1           1
           1          22          27           4           1           1
           1          22          28           1           1           1
           1          22          28           2           1           1
           1          22          28           3           1           1
           1          22          28           4           1           1
           1          22          29           1           1           1
           1          22          29           2           1           1
           1          22          29           3           2           1
           1          22          29           4           1           1
           1          22          30           1           1           1
           1          22          30           2           2           1
           1          22          30           3           1           1
           1          22          30           4           2           1
           1          22          31           1           2           1
           1          22          31           2           1           1
           1          22          31           3           2           1
           1          22          31           4           1           1
           1          22          32           1           2           1
           1          22          32           2           2           1
           1          22          32           3           1           1
           1          22          32           4           1           1
           1          23           1           1           1           1
           1          23           1           2           2           1
           1          23           1           3           1           1
           1          23           1           4           1           1
           1          23           2           1           1           1
           1          23           2           2           1           1
           1          23           2           3           1           1
           1          23           2           4           2           1
           1          23           3           1           1           1
           1          23           3           2           1           1
           1          23           3           3           1           1
           1          23           3           4           1           1
           1          23           4           1           2           1
           1          23           4           2           1           1
           1          23           4           3           1           1
           1          23           4           4           1           1
           1          23           5           1           2           1
           1          23           5           2           1           1
           1          23           5           3           1           1
           1          23           5           4           1           1
           1          23           6           1           1           1
           1          23           6           2           1           1
           1          23           6           3           1           1
           1          23           6           4           1           1
           1          23           7           1           1           1
           1          23           7           2           1           1
           1          23           7           3           1           1
           1          23           7           4           1           1
           1          23           8           1           1           1
           1          23           8           2           1           1
           1          23           8           3           2           1
           1          23           8           4           1           1
           1          23           9           1           1           1
           1          23           9           2           1           1
           1          23           9           3           1           1
           1          23           9           4           1           1
           1          23          10           1           1           1
           1          23          10           2           2           1
           1          23          10           3           1           1
           1          23          10           4           1           1
           1          23          11           1           2           1
           1          23          11           2           1           1
           1          23          11           3           1           1
           1          23          11           4           2           1
           1          23          12           1           1           1
           1          23          12           2           2           1
           1          23          12           3           1           1
           1          23          12           4           2           1
           1          23          13           1           2           1
           1          23          13           2           1           1
           1          23          13           3           2           1
           1          23          13           4           1           1
           1          23          14           1           1           1
           1          23          14           2           2           1
           1          23          14           3           2           1
           1          23          14           4           1           1
           1          23          15           1           2           1
           1          23          15           2           1           1
           1          23          15           3           2           1
           1          23          15           4           2           1
           1          23          16           1           1           1
           1          23          16           2           1           1
           1          23          16           3           1           1
           1          23          16           4           1           1
           1          23          17           1           1           1
           1          23          17           2           1           1
           1          23          17           3           1           1
           1          23          17           4           1           1
           1          23          18           1           1           1
           1          23          18           2           1           1
           1          23          18           3           1           1
           1          23          18           4           1           1
           1          23          19           1           2           1
           1          23          19           2           1           1
           1          23          19           3           1           1
           1          23          19           4           2           1
           1          23          20           1           2           1
           1          23          20           2           2           1
           1          23          20           3           2           1
           1          23          20           4           1           1
           1          23          21           1           1           1
           1          23          21           2           1           1
           1          23          21           3           1           1
           1          23          21           4           1           1
           1          23          22           1           1           1
           1          23          22           2           2           1
           1          23          22           3           2           1
           1          23          22           4           1           1
           1          23          23           1           1           1
           1          23          23           2           1           1
           1          23          23           3           1           1
           1          23          23           4           1           1
           1          23          24           1           2           1
           1          23          24           2           2           1
           1          23          24           3           2           1
           1          23          24           4           1           1
           1          23          25           1           1           1
           1          23          25           2           1           1
           1          23          25           3           1           1
           1          23          25           4           1           1
           1          23          26           1           1           1
           1          23          26           2           1           1
           1          23          26           3           2           1
           1          23          26           4           1           1
           1          23          27           1           1           1
           1          23          27           2           1           1
           1          23          27           3           1           1
           1          23          27           4           1           1
           1          23          28           1           1           1
           1          23          28           2           1           1
           1          23          28           3           1           1
           1          23          28           4           2           1
           1          23          29           1           1           1
           1          23          29           2           1           1
           1          23          29           3           2           1
           1          23          29           4           1           1
           1          23          30           1           1           1
           1          23          30           2           2           1
           1          23          30           3           2           1
           1          23          30           4           1           1
           1          23          31           1           2           1
           1          23          31           2           1           1
           1          23          31           3           2           1
           1          23          31           4           1           1
           1          23          32           1           1           1
           1          23          32           2           1           1
           1          23          32           3           2           1
           1          23          32           4           1           1
           1          24           1           1           1           1
           1          24           1           2           2           1
           1          24           1           3           1           1
           1          24           1           4           1           1
           1          24           2           1           1           1
           1          24           2           2           2           1
           1          24           2           3           1           1
           1          24           2           4           1           1
           1          24           3           1           1           1
           1          24           3           2           1           1
           1          24           3           3           1           1
           1          24           3           4           2           1
           1          24           4           1           1           1
           1          24           4           2           1           1
           1          24           4           3           2           1
           1          24           4           4           1           1
           1          24           5           1           2           1
           1          24           5           2           1           1
           1          24           5           3           1           1
           1          24           5           4           1           1
           1          24           6           1           2           1
           1          24           6           2           1           1
           1          24           6           3           1           1
           1          24           6           4           1           1
           1          24           7           1           1           1
           1          24           7           2           1           1
           1          24           7           3           1           1
           1          24           7           4           1           1
           1          24           8           1           1           1
           1          24           8           2           1           1
           1          24           8           3           1           1
           1          24           8           4           2           1
           1          24           9           1           1           1
           1          24           9           2           1           1
           1          24           9           3           1           1
           1          24           9           4           1           1
           1          24          10           1           2           1
           1          24          10           2           1           1
           1          24          10           3           2           1
           1          24          10           4           2           1
           1          24          11           1           1           1
           1          24          11           2           1           1
           1          24          11           3           1           1
           1          24          11           4           1           1
           1          24          12           1           1           1
           1          24          12           2           1           1
           1          24          12           3           1           1
           1          24          12           4           1           1
           1          24          13           1           1           1
           1          24          13           2           1           1
           1          24          13           3           1           1
           1          24          13           4           1           1
           1          24          14           1           1           1
           1          24          14           2           2           1
           1          24          14           3           1           1
           1          24          14           4           1           1
           1          24          15           1           1           1
           1          24          15           2           1           1
           1          24          15           3           2           1
           1          24          15           4           2           1
           1          24          16           1           1           1
           1          24          16           2           1           1
           1          24          16           3           1           1
           1          24          16           4           1           1
           1          24          17           1           2           1
           1          24          17           2           1           1
           1          24          17           3           1           1
           1          24          17           4           1           1
           1          24          18           1           1           1
           1          24          18           2           1           1
           1          24          18           3           1           1
           1          24          18           4           2           1
           1          24          19           1           2           1
           1          24          19           2           1           1
           1          24          19           3           1           1
           1          24          19           4           2           1
           1          24          20           1           2           1
           1          24          20           2           2           1
           1          24          20           3           1           1
           1          24          20           4           2           1
           1          24          21           1           1           1
           1          24          21           2           2           1
           1          24          21           3           2           1
           1          24          21           4           2           1
           1          24          22           1           1           1
           1          24          22           2           1           1
           1          24          22           3           1           1
           1          24          22           4           1           1
           1          24          23           1           1           1
           1          24          23           2           1           1
           1          24          23           3           1           1
           1          24          23           4           1           1
           1          24          24           1           1           1
           1          24          24           2           1           1
           1          24          24           3           1           1
           1          24          24           4           2           1
           1          24          25           1           1           1
           1          24          25           2           2           1
           1          24          25           3           1           1
           1          24          25           4           1           1
           1          24          26           1           1           1
           1          24          26           2           1           1
           1          24          26           3           1           1
           1          24          26           4           1           1
           1          24          27           1           1           1
           1          24          27           2           2           1
           1          24          27           3           1           1
           1          24          27           4           1           1
           1          24          28           1           1           1
           1          24          28           2           1           1
           1          24          28           3           2           1
           1          24          28           4           1           1
           1          24          29           1           1           1
           1          24          29           2           1           1
           1          24          29           3           1           1
           1          24          29           4           1           1
           1          24          30           1           1           1
           1          24          30           2           1           1
           1          24          30           3           2           1
           1          24          30           4           2           1
           1          24          31           1           1           1
           1          24          31           2           1           1
           1          24          31           3           1           1
           1          24          31           4           1           1
           1          24          32           1           1           1
           1          24          32           2           1           1
           1          24          32           3           1           1
           1          24          32           4           2           1
           1          25           1           1           1           1
           1          25           1           2           2           1
           1          25           1           3           2           1
           1          25           1           4           2           1
           1          25           2           1           2           1
           1          25           2           2           1           1
           1          25           2           3           2           1
           1          25           2           4           1           1
           1          25           3           1           2           1
           1          25           3           2           1           1
           1          25           3           3           1           1
           1          25           3           4           1           1
           1          25           4           1           2           1
           1          25           4           2           1           1
           1          25           4           3           2           1
           1          25           4           4           2           1
           1          25           5           1           1           1
           1          25           5           2           2           1
           1          25           5           3           2           1
           1          25           5           4           2           1
           1          25           6           1           2           1
           1          25           6           2           1           1
           1          25           6           3           1           1
           1          25           6           4           2           1
           1          25           7           1           2           1
           1          25           7           2           1           1
           1          25           7           3           1           1
           1          25           7           4           2           1
           1          25           8           1           2           1
           1          25           8           2           1           1
           1          25           8           3           1           1
           1          25           8           4           2           1
           1          25           9           1           2           1
           1          25           9           2           1           1
           1          25           9           3           1           1
           1          25           9           4           1           1
           1          25          10           1           2           1
           1          25          10           2           2           1
           1          25          10           3           1           1
           1          25          10           4           1           1
           1          25          11           1           2           1
           1          25          11           2           1           1
           1          25          11           3           1           1
           1          25          11           4           1           1
           1          25          12           1           1           1
           1          25          12           2           1           1
           1          25          12           3           1           1
           1          25          12           4           2           1
           1          25          13           1           1           1
           1          25          13           2           1           1
           1          25          13           3           1           1
           1          25          13           4           1           1
           1          25          14           1           1           1
           1          25          14           2           1           1
           1          25          14           3           1           1
           1          25          14           4           1           1
           1          25          15           1           1           1
           1          25          15           2           2           1
           1          25          15           3           1           1
           1          25          15           4           1           1
           1          25          16           1           1           1
           1          25          16           2           1           1
           1          25          16           3           1           1
           1          25          16           4           1           1
           1          25          17           1           1           1
           1          25          17           2           1           1
           1          25          17           3           1           1
           1          25          17           4           2           1
           1          25          18           1           1           1
           1          25          18           2           1           1
           1          25          18           3           1           1
           1          25          18           4           1           1
           1          25          19           1           1           1
           1          25          19           2           1           1
           1          25          19           3           1           1
           1          25          19           4           1           1
           1          25          20           1           2           1
           1          25          20           2           2           1
           1          25          20           3           2           1
           1          25          20           4           2           1
           1          25          21           1           2           1
           1          25          21           2           1           1
           1          25          21           3           2           1
           1          25          21           4           2           1
           1          25          22           1           2           1
           1          25          22           2           1           1
           1          25          22           3           1           1
           1          25          22           4           2           1
           1          25          23           1           2           1
           1          25          23           2           1           1
           1          25          23           3           2           1
           1          25          23           4           2           1
           1          25          24           1           1           1
           1          25          24           2           1           1
           1          25          24           3           1           1
           1          25          24           4           1           1
           1          25          25           1           1           1
           1          25          25           2           1           1
           1          25          25           3           1           1
           1          25          25           4           1           1
           1          25          26           1           1           1
           1          25          26           2           1           1
           1          25          26           3           1           1
           1          25          26           4           1           1
           1          25          27           1           2           1
           1          25          27           2           1           1
           1          25          27           3           2           1
           1          25          27           4           1           1
           1          25          28           1           2           1
           1          25          28           2           1           1
           1          25          28           3           1           1
           1          25          28           4           2           1
           1          25          29           1           1           1
           1          25          29           2           1           1
           1          25          29           3           1           1
           1          25          29           4           1           1
           1          25          30           1           2           1
           1          25          30           2           1           1
           1          25          30           3           1           1
           1          25          30           4           1           1
           1          25          31           1           1           1
           1          25          31           2           1           1
           1          25          31           3           1           1
           1          25          31           4           1           1
           1          25          32           1           1           1
           1          25          32           2           1           1
           1          25          32           3           1           1
           1          25          32           4           1           1
           1          26           1           1           1           1
           1          26           1           2           2           1
           1          26           1           3           2           1
           1          26           1           4           1           1
           1          26           2           1           2           1
           1          26           2           2           1           1
           1          26           2           3           1           1
           1          26           2           4           1           1
           1          26           3           1           2           1
           1          26           3           2           1           1
           1          26           3           3           1           1
           1          26           3           4           2           1
           1          26           4           1           1           1
           1          26           4           2           1           1
           1          26           4           3           1           1
           1          26           4           4           1           1
           1          26           5           1           2           1
           1          26           5           2           2           1
           1          26           5           3           2           1
           1          26           5           4           2           1
           1          26           6           1           2           1
           1          26           6           2           1           1
           1          26           6           3           1           1
           1          26           6           4           1           1
           1          26           7           1           1           1
           1          26           7           2           2           1
           1          26           7           3           1           1
           1          26           7           4           1           1
           1          26           8           1           1           1
           1          26           8           2           2           1
           1          26           8           3           1           1
           1          26           8           4           2           1
           1          26           9           1           1           1
           1          26           9           2           1           1
           1          26           9           3           2           1
           1          26           9           4           1           1
           1          26          10           1           1           1
           1          26          10           2           1           1
           1          26          10           3           1           1
           1          26          10           4           2           1
           1          26          11           1           2           1
           1          26          11           2           1           1
           1          26          11           3           1           1
           1          26          11           4           1           1
           1          26          12           1           2           1
           1          26          12           2           2           1
           1          26          12           3           1           1
           1          26          12           4           1           1
           1          26          13           1           2           1
           1          26          13           2           2           1
           1          26          13           3           2           1
           1          26          13           4           1           1
           1          26          14           1           1           1
           1          26          14           2           1           1
           1          26          14           3           1           1
           1          26          14           4           1           1
           1          26          15           1           1           1
           1          26          15           2           2           1
           1          26          15           3           2           1
           1          26          15           4           2           1
           1          26          16           1           1           1
           1          26          16           2           1           1
           1          26          16           3           1           1
           1          26          16           4           1           1
           1          26          17           1           2           1
           1          26          17           2           1           1
           1          26          17           3           1           1
           1          26          17           4           1           1
           1          26          18           1           1           1
           1          26          18           2           2           1
           1          26          18           3           1           1
           1          26          18           4           1           1
           1          26          19           1           1           1
           1          26          19           2           1           1
           1          26          19           3           1           1
           1          26          19           4           1           1
           1          26          20           1           2           1
           1          26          20           2           1           1
           1          26          20           3           1           1
           1          26          20           4           1           1
           1          26          21           1           1           1
           1          26          21           2           1           1
           1          26          21           3           1           1
           1          26          21           4           1           1
           1          26          22           1           1           1
           1          26          22           2           1           1
           1          26          22           3           1           1
           1          26          22           4           1           1
           1          26          23           1           1           1
           1          26          23           2           1           1
           1          26          23           3           2           1
           1          26          23           4           1           1
           1          26          24           1           1           1
           1          26          24           2           2           1
           1          26          24           3           1           1
           1          26          24           4           1           1
           1          26          25           1           1           1
           1          26          25           2           1           1
           1          26          25           3           1           1
           1          26          25           4           1           1
           1          26          26           1           1           1
           1          26          26           2           1           1
           1          26          26           3           2           1
           1          26          26           4           1           1
           1          26          27           1           1           1
           1          26          27           2           1           1
           1          26          27           3           2           1
           1          26          27           4           1           1
           1          26          28           1           1           1
           1          26          28           2           1           1
           1          26          28           3           1           1
           1          26          28           4           2           1
           1          26          29           1           2           1
           1          26          29           2           2           1
           1          26          29           3           1           1
           1          26          29           4           1           1
           1          26          30           1           1           1
           1          26          30           2           1           1
           1          26          30           3           1           1
           1          26          30           4           1           1
           1          26          31           1           2           1
           1          26          31           2           1           1
           1          26          31           3           1           1
           1          26          31           4           2           1
           1          26          32           1           1           1
           1          26          32           2           2           1
           1          26          32           3           1           1
           1          26          32           4           1           1
           1          27           1           1           1           1
           1          27           1           2           1           1
           1          27           1           3           1           1
           1          27           1           4           2           1
           1          27           2           1           1           1
           1          27           2           2           2           1
           1          27           2           3           1           1
           1          27           2           4           2           1
           1          27           3           1           1           1
           1          27           3           2           1           1
           1          27           3           3           1           1
           1          27           3           4           2           1
           1          27           4           1           1           1
           1          27           4           2           1           1
           1          27           4           3           2           1
           1          27           4           4           1           1
           1          27           5           1           2           1
           1          27           5           2           2           1
           1          27           5           3           2           1
           1          27           5           4           2           1
           1          27           6           1           2           1
           1          27           6           2           2           1
           1          27           6           3           1           1
           1          27           6           4           1           1
           1          27           7           1           2           1
           1          27           7           2           1           1
           1          27           7           3           2           1
           1          27           7           4           1           1
           1          27           8           1           1           1
           1          27           8           2           1           1
           1          27           8           3           1           1
           1          27           8           4           2           1
           1          27           9           1           2           1
           1          27           9           2           1           1
           1          27           9           3           2           1
           1          27           9           4           1           1
           1          27          10           1           1           1
           1          27          10           2           1           1
           1          27          10           3           1           1
           1          27          10           4           1           1
           1          27          11           1           2           1
           1          27          11           2           1           1
           1          27          11           3           2           1
           1          27          11           4           1           1
           1          27          12           1           1           1
           1          27          12           2           1           1
           1          27          12           3           1           1
           1          27          12           4           1           1
           1          27          13           1           1           1
           1          27          13           2           1           1
           1          27          13           3           2           1
           1          27          13           4           1           1
           1          27          14           1           1           1
           1          27          14           2           2           1
           1          27          14           3           1           1
           1          27          14           4           2           1
           1          27          15           1           1           1
           1          27          15           2           1           1
           1          27          15           3           2           1
           1          27          15           4           1           1
           1          27          16           1           2           1
           1          27          16           2           1           1
           1          27          16           3           1           1
           1          27          16           4           1           1
           1          27          17           1           1           1
           1          27          17           2           2           1
           1          27          17           3           2           1
           1          27          17           4           1           1
           1          27          18           1           1           1
           1          27          18           2           1           1
           1          27          18           3           2           1
           1          27          18           4           1           1
           1          27          19           1           1           1
           1          27          19           2           1           1
           1          27          19           3           2           1
           1          27          19           4           2           1
           1          27          20           1           1           1
           1          27          20           2           1           1
           1          27          20           3           1           1
           1          27          20           4           1           1
           1          27          21           1           1           1
           1          27          21           2           1           1
           1          27          21           3           1           1
           1          27          21           4           2           1
           1          27          22           1           1           1
           1          27          22           2           1           1
           1          27          22           3           1           1
           1          27          22           4           1           1
           1          27          23           1           1           1
           1          27          23           2           1           1
           1          27          23           3           1           1
           1          27          23           4           1           1
           1          27          24           1           1           1
           1          27          24           2           2           1
           1          27          24           3           2           1
           1          27          24           4           2           1
           1          27          25           1           1           1
           1          27          25           2           2           1
           1          27          25           3           2           1
           1          27          25           4           2           1
           1          27          26           1           1           1
           1          27          26           2           2           1
           1          27          26           3           2           1
           1          27          26           4           1           1
           1          27          27           1           2           1
           1          27          27           2           2           1
           1          27          27           3           2           1
           1          27          27           4           1           1
           1          27          28           1           1           1
           1          27          28           2           2           1
           1          27          28           3           1           1
           1          27          28           4           2           1
           1          27          29           1           2           1
           1          27          29           2           1           1
           1          27          29           3           1           1
           1          27          29           4           1           1
           1          27          30           1           1           1
           1          27          30           2           1           1
           1          27          30           3           2           1
           1          27          30           4           2           1
           1          27          31           1           1           1
           1          27          31           2           2           1
           1          27          31           3           1           1
           1          27          31           4           1           1
           1          27          32           1           1           1
           1          27          32           2           1           1
           1          27          32           3           2           1
           1          27          32           4           2           1
           1          28           1           1           2           1
           1          28           1           2           1           1
           1          28           1           3           1           1
           1          28           1           4           1           1
           1          28           2           1           1           1
           1          28           2           2           1           1
           1          28           2           3           1           1
           1          28           2           4           2           1
           1          28           3           1           1           1
           1          28           3           2           1           1
           1          28           3           3           1           1
           1          28           3           4           2           1
           1          28           4           1           2           1
           1          28           4           2           2           1
           1          28           4           3           1           1
           1          28           4           4           2           1
           1          28           5           1           1           1
           1          28           5           2           1           1
           1          28           5           3           2           1
           1          28           5           4           2           1
           1          28           6           1           1           1
           1          28           6           2           2           1
           1          28           6           3           1           1
           1          28           6           4           1           1
           1          28           7           1           2           1
           1          28           7           2           1           1
           1          28           7           3           2           1
           1          28           7           4           1           1
           1          28           8           1           1           1
           1          28           8           2           1           1
           1          28           8           3           2           1
           1          28           8           4           1           1
           1          28           9           1           2           1
           1          28           9           2           1           1
           1          28           9           3           2           1
           1          28           9           4           2           1
           1          28          10           1           1           1
           1          28          10           2           2           1
           1          28          10           3           1           1
           1          28          10           4           1           1
           1          28          11           1           1           1
           1          28          11           2           2           1
           1          28          11           3           1           1
           1          28          11           4           1           1
           1          28          12           1           1           1
           1          28          12           2           1           1
           1          28          12           3           2           1
           1          28          12           4           1           1
           1          28          13           1           1           1
           1          28          13           2           1           1
           1          28          13           3           2           1
           1          28          13           4           1           1
           1          28          14           1           1           1
           1          28          14           2           1           1
           1          28          14           3           1           1
           1          28          14           4           2           1
           1          28          15           1           1           1
           1          28          15           2           2           1
           1          28          15           3           1           1
           1          28          15           4           1           1
           1          28          16           1           2           1
           1          28          16           2           1           1
           1          28          16           3           1           1
           1          28          16           4           2           1
           1          28          17           1           1           1
           1          28          17           2           2           1
           1          28          17           3           2           1
           1          28          17           4           2           1
           1          28          18           1           2           1
           1          28          18           2           1           1
           1          28          18           3           1           1
           1          28          18           4           1           1
           1          28          19           1           2           1
           1          28          19           2           1           1
           1          28          19           3           1           1
           1          28          19           4           2           1
           1          28          20           1           2           1
           1          28          20           2           1           1
           1          28          20           3           1           1
           1          28          20           4           2           1
           1          28          21           1           1           1
           1          28          21           2           1           1
           1          28          21           3           1           1
           1          28          21           4           1           1
           1          28          22           1           1           1
           1          28          22           2           1           1
           1          28          22           3           2           1
           1          28          22           4           1           1
           1          28          23           1           1           1
           1          28          23           2           1           1
           1          28          23           3           1           1
           1          28          23           4           1           1
           1          28          24           1           1           1
           1          28          24           2           1           1
           1          28          24           3           1           1
           1          28          24           4           2           1
           1          28          25           1           1           1
           1          28          25           2           2           1
           1          28          25           3           1           1
           1          28          25           4           1           1
           1          28          26           1           1           1
           1          28          26           2           1           1
           1          28          26           3           2           1
           1          28          26           4           1           1
           1          28          27           1           2           1
           1          28          27           2           1           1
           1          28          27           3           1           1
           1          28          27           4           1           1
           1          28          28           1           2           1
           1          28          28           2           1           1
           1          28          28           3           2           1
           1          28          28           4           1           1
           1          28          29           1           1           1
           1          28          29           2           1           1
           1          28          29           3           1           1
           1          28          29           4           2           1
           1          28          30           1           1           1
           1          28          30           2           1           1
           1          28          30           3           1           1
           1          28          30           4           2           1
           1          28          31           1           1           1
           1          28          31           2           1           1
           1          28          31           3           1           1
           1          28          31           4           1           1
           1          28          32           1           1           1
           1          28          32           2           1           1
           1          28          32           3           1           1
           1          28          32           4           1           1
           1          29           1           1           1           1
           1          29           1           2           1           1
           1          29           1           3           1           1
           1          29           1           4           1           1
           1          29           2           1           2           1
           1          29           2           2           1           1
           1          29           2           3           2           1
           1          29           2           4           1           1
           1          29           3           1           2           1
           1          29           3           2           1           1
           1          29           3           3           2           1
           1          29           3           4           2           1
           1          29           4           1           1           1
           1          29           4           2           1           1
           1          29           4           3           2           1
           1          29           4           4           2           1
           1          29           5           1           1           1
           1          29           5           2           1           1
           1          29           5           3           1           1
           1          29           5           4           1           1
           1          29           6           1           1           1
           1          29           6           2           1           1
           1          29           6           3           1           1
           1          29           6           4           1           1
           1          29           7           1           2           1
           1          29           7           2           1           1
           1          29           7           3           1           1
           1          29           7           4           1           1
           1          29           8           1           1           1
           1          29           8           2           1           1
           1          29           8           3           1           1
           1          29           8           4           1           1
           1          29           9           1           1           1
           1          29           9           2           1           1
           1          29           9           3           1           1
           1          29           9           4           1           1
           1          29          10           1           2           1
           1          29          10           2           2           1
           1          29          10           3           2           1
           1          29          10           4           2           1
           1          29          11           1           1           1
           1          29          11           2           1           1
           1          29          11           3           1           1
           1          29          11           4           1           1
           1          29          12           1           1           1
           1          29          12           2           1           1
           1          29          12           3           2           1
           1          29          12           4           1           1
           1          29          13           1           1           1
           1          29          13           2           1           1
           1          29          13           3           1           1
           1          29          13           4           1           1
           1          29          14           1           1           1
           1          29          14           2           1           1
           1          29          14           3           1           1
           1          29          14           4           1           1
           1          29          15           1           2           1
           1          29          15           2           1           1
           1          29          15           3           2           1
           1          29          15           4           2           1
           1          29          16           1           2           1
           1          29          16           2           1           1
           1          29          16           3           1           1
           1          29          16           4           1           1
           1          29          17           1           2           1
           1          29          17           2           1           1
           1          29          17           3           1           1
           1          29          17           4           2           1
           1          29          18           1           1           1
           1          29          18           2           1           1
           1          29          18           3           1           1
           1          29          18           4           2           1
           1          29          19           1           1           1
           1          29          19           2           2           1
           1          29          19           3           1           1
           1          29          19           4           1           1
           1          29          20           1           2           1
           1          29          20           2           1           1
           1          29          20           3           1           1
           1          29          20           4           2           1
           1          29          21           1           2           1
           1          29          21           2           1           1
           1          29          21           3           1           1
           1          29          21           4           1           1
           1          29          22           1           1           1
           1          29          22           2           1           1
           1          29          22           3           1           1
           1          29          22           4           1           1
           1          29          23           1           1           1
           1          29          23           2           1           1
           1          29          23           3           2           1
           1          29          23           4           1           1
           1          29          24           1           2           1
           1          29          24           2           1           1
           1          29          24           3           1           1
           1          29          24           4           1           1
           1          29          25           1           1           1
           1          29          25           2           2           1
           1          29          25           3           1           1
           1          29          25           4           1           1
           1          29          26           1           1           1
           1          29          26           2           1           1
           1          29          26           3           1           1
           1          29          26           4           1           1
           1          29          27           1           2           1
           1          29          27           2           2           1
           1          29          27           3           1           1
           1          29          27           4           1           1
           1          29          28           1           1           1
           1          29          28           2           2           1
           1          29          28           3           2           1
           1          29          28           4           1           1
           1          29          29           1           1           1
           1          29          29           2           1           1
           1          29          29           3           2           1
           1          29          29           4           2           1
           1          29          30           1           2           1
           1          29          30           2           2           1
           1          29          30           3           1           1
           1          29          30           4           1           1
           1          29          31           1           1           1
           1          29          31           2           1           1
           1          29          31           3           1           1
           1          29          31           4           1           1
           1          29          32           1           2           1
           1          29          32           2           1           1
           1          29          32           3           1           1
           1          29          32           4           1           1
           1          30           1           1           1           1
           1          30           1           2           1           1
           1          30           1           3           1           1
           1          30           1           4           1           1
           1          30           2           1           1           1
           1          30           2           2           1           1
           1          30           2           3           2           1
           1          30           2           4           1           1
           1          30           3           1           2           1
           1          30           3           2           1           1
           1          30           3           3           1           1
           1          30           3           4           2           1
           1          30           4           1           1           1
           1          30           4           2           1           1
           1          30           4           3           1           1
           1          30           4           4           2           1
           1          30           5           1           1           1
           1          30           5           2           2           1
           1          30           5           3           1           1
           1          30           5           4           1           1
           1          30           6           1           1           1
           1          30           6           2           1           1
           1          30           6           3           1           1
           1          30           6           4           2           1
           1          30           7           1           1           1
           1          30           7           2           1           1
           1          30           7           3           1           1
           1          30           7           4           1           1
           1          30           8           1           1           1
           1          30           8           2           1           1
           1          30           8           3           1           1
           1          30           8           4           1           1
           1          30           9           1           2           1
           1          30           9           2           1           1
           1          30           9           3           1           1
           1          30           9           4           2           1
           1          30          10           1           1           1
           1          30          10           2           1           1
           1          30          10           3           1           1
           1          30          10           4           1           1
           1          30          11           1           1           1
           1          30          11           2           1           1
           1          30          11           3           2           1
           1          30          11           4           1           1
           1          30          12           1           1           1
           1          30          12           2           1           1
           1          30          12           3           1           1
           1          30          12           4           1           1
           1          30          13           1           1           1
           1          30          13           2           2           1
           1          30          13           3           1           1
           1          30          13           4           1           1
           1          30          14           1           1           1
           1          30          14           2           1           1
           1          30          14           3           2           1
           1          30          14           4           2           1
           1          30          15           1           2           1
           1          30          15           2           2           1
           1          30          15           3           1           1
           1          30          15           4           2           1
           1          30          16           1           2           1
           1          30          16           2           1           1
           1          30          16           3           1           1
           1          30          16           4           1           1
           1          30          17           1           1           1
           1          30          17           2           1           1
           1          30          17           3           1           1
           1          30          17           4           1           1
           1          30          18           1           1           1
           1          30          18           2           2           1
           1          30          18           3           1           1
           1          30          18           4           2           1
           1          30          19           1           1           1
           1          30          19           2           1           1
           1          30          19           3           1           1
           1          30          19           4           2           1
           1          30          20           1           2           1
           1          30          20           2           2           1
           1          30          20           3           1           1
           1          30          20           4           2           1
           1          30          21           1           2           1
           1          30          21           2           1           1
           1          30          21           3           1           1
           1          30          21           4           2           1
           1          30          22           1           1           1
           1          30          22           2           1           1
           1          30          22           3           1           1
           1          30          22           4           1           1
           1          30          23           1           2           1
           1          30          23           2           1           1
           1          30          23           3           2           1
           1          30          23           4           1           1
           1          30          24           1           2           1
           1          30          24           2           1           1
           1          30          24           3           1           1
           1          30          24           4           1           1
           1          30          25           1           2           1
           1          30          25           2           1           1
           1          30          25           3           1           1
           1          30          25           4           2           1
           1          30          26           1           1           1
           1          30          26           2           2           1
           1          30          26           3           2           1
           1          30          26           4           1           1
           1          30          27           1           1           1
           1          30          27           2           1           1
           1          30          27           3           2           1
           1          30          27           4           1           1
           1          30          28           1           2           1
           1          30          28           2           1           1
           1          30          28           3           1           1
           1          30          28           4           1           1
           1          30          29           1           1           1
           1          30          29           2           2           1
           1          30          29           3           2           1
           1          30          29           4           1           1
           1          30          30           1           1           1
           1          30          30           2           2           1
           1          30          30           3           1           1
           1          30          30           4           1           1
           1          30          31           1           2           1
           1          30          31           2           2           1
           1          30          31           3           1           1
           1          30          31           4           1           1
           1          30          32           1           1           1
           1          30          32           2           1           1
           1          30          32           3           1           1
           1          30          32           4           2           1
           1          31           1           1           1           1
           1          31           1           2           2           1
           1          31           1           3           1           1
           1          31           1           4           1           1
           1          31           2           1           1           1
           1          31           2           2           1           1
           1          31           2           3           1           1
           1          31           2           4           1           1
           1          31           3           1           2           1
           1          31           3           2           2           1
           1          31           3           3           1           1
           1          31           3           4           1           1
           1          31           4           1           2           1
           1          31           4           2           2           1
           1          31           4           3           1           1
           1          31           4           4           1           1
           1          31           5           1           2           1
           1          31           5           2           2           1
           1          31           5           3           1           1
           1          31           5           4           1           1
           1          31           6           1           2           1
           1          31           6           2           1           1
           1          31           6           3           2           1
           1          31           6           4           2           1
           1          31           7           1           1           1
           1          31           7           2           1           1
           1          31           7           3           1           1
           1          31           7           4           2           1
           1          31           8           1           1           1
           1          31           8           2           1           1
           1          31           8           3           1           1
           1          31           8           4           1           1
           1          31           9           1           2           1
           1          31           9           2           1           1
           1          31           9           3           1           1
           1          31           9           4           1           1
           1          31          10           1           1           1
           1          31          10           2           1           1
           1          31          10           3           1           1
           1          31          10           4           1           1
           1          31          11           1           2           1
           1          31          11           2           1           1
           1          31          11           3           2           1
           1          31          11           4           1           1
           1          31          12           1           1           1
           1          31          12           2           1           1
           1          31          12           3           2           1
           1          31          12           4           1           1
           1          31          13           1           2           1
           1          31          13           2           1           1
           1          31          13           3           2           1
           1          31          13           4           1           1
           1          31          14           1           1           1
           1          31          14           2           2           1
           1          31          14           3           2           1
           1          31          14           4           1           1
           1          31          15           1           1           1
           1          31          15           2           2           1
           1          31          15           3           1           1
           1          31          15           4           2           1
           1          31          16           1           1           1
           1          31          16           2           1           1
           1          31          16           3           1           1
           1          31          16           4           1           1
           1          31          17           1           1           1
           1          31          17           2           1           1
           1          31          17           3           1           1
           1          31          17           4           2           1
           1          31          18           1           2           1
           1          31          18           2           2           1
           1          31          18           3           1           1
           1          31          18           4           1           1
           1          31          19           1           1           1
           1          31          19           2           1           1
           1          31          19           3           2           1
           1          31          19           4           2           1
           1          31          20           1           1           1
           1          31          20           2           2           1
           1          31          20           3           1           1
           1          31          20           4           2           1
           1          31          21           1           1           1
           1          31          21           2           1           1
           1          31          21           3           2           1
           1          31          21           4           1           1
           1          31          22           1           1           1
           1          31          22           2           1           1
           1          31          22           3           1           1
           1          31          22           4           1           1
           1          31          23           1           1           1
           1          31          23           2           1           1
           1          31          23           3           1           1
           1          31          23           4           1           1
           1          31          24           1           1           1
           1          31          24           2           2           1
           1          31          24           3           1           1
           1          31          24           4           2           1
           1          31          25           1           2           1
           1          31          25           2           1           1
           1          31          25           3           1           1
           1          31          25           4           2           1
           1          31          26           1           2           1
           1          31          26           2           2           1
           1          31          26           3           1           1
           1          31          26           4           2           1
           1          31          27           1           1           1
           1          31          27           2           2           1
           1          31          27           3           2           1
           1          31          27           4           1           1
           1          31          28           1           1           1
           1          31          28           2           2           1
           1          31          28           3           2           1
           1          31          28           4           2           1
           1          31          29           1           2           1
           1          31          29           2           1           1
           1          31          29           3           2           1
           1          31          29           4           1           1
           1          31          30           1           1           1
           1          31          30           2           1           1
           1          31          30           3           1           1
           1          31          30           4           1           1
           1          31          31           1           2           1
           1          31          31           2           2           1
           1          31          31           3           2           1
           1          31          31           4           2           1
           1          31          32           1           2           1
           1          31          32           2           2           1
           1          31          32           3           2           1
           1          31          32           4           1           1
           1          32           1           1           1           1
           1          32           1           2           2           1
           1          32           1           3           1           1
           1          32           1           4           2           1
           1          32           2           1           2           1
           1          32           2           2           2           1
           1          32           2           3           2           1
           1          32           2           4           1           1
           1          32           3           1           1           1
           1          32           3           2           1           1
           1          32           3           3           1           1
           1          32           3           4           1           1
           1          32           4           1           1           1
           1          32           4           2           1           1
           1          32           4           3           1           1
           1          32           4           4           2           1
           1          32           5           1           1           1
           1          32           5           2           2           1
           1          32           5           3           1           1
           1          32           5           4           1           1
           1          32           6           1           2           1
           1          32           6           2           2           1
           1          32           6           3           2           1
           1          32           6           4           2           1
           1          32           7           1           2           1
           1          32           7           2           2           1
           1          32           7           3           2           1
           1          32           7           4           1           1
           1          32           8           1           1           1
           1          32           8           2           1           1
           1          32           8           3           1           1
           1          32           8           4           1           1
           1          32           9           1           1           1
           1          32           9           2           1           1
           1          32           9           3           1           1
           1          32           9           4           2           1
           1          32          10           1           2           1
           1          32          10           2           2           1
           1          32          10           3           1           1
           1          32          10           4           1           1
           1          32          11           1           2           1
           1          32          11           2           1           1
           1          32          11           3           1           1
           1          32          11           4           2           1
           1          32          12           1           1           1
           1          32          12           2           1           1
           1          32          12           3           1           1
           1          32          12           4           1           1
           1          32          13           1           1           1
           1          32          13           2           2           1
           1          32          13           3           1           1
           1          32          13           4           2           1
           1          32          14           1           1           1
           1          32          14           2           1           1
           1          32          14           3           1           1
           1          32          14           4           2           1
           1          32          15           1           1           1
           1          32          15           2           1           1
           1          32          15           3           2           1
           1          32          15           4           1           1
           1          32          16           1           2           1
           1          32          16           2           1           1
           1          32          16           3           2           1
           1          32          16           4           1           1
           1          32          17           1           1           1
           1          32          17           2           1           1
           1          32          17           3           1           1
           1          32          17           4           1           1
           1          32          18           1           1           1
           1          32          18           2           2           1
           1          32          18           3           1           1
           1          32          18           4           1           1
           1          32          19           1           1           1
           1          32          19           2           1           1
           1          32          19           3           2           1
           1          32          19           4           1           1
           1          32          20           1           1           1
           1          32          20           2           1           1
           1          32          20           3           1           1
           1          32          20           4           2           1
           1          32          21           1           1           1
           1          32          21           2           1           1
           1          32          21           3           1           1
           1          32          21           4           1           1
           1          32          22           1           1           1
           1          32          22           2           2           1
           1          32          22           3           1           1
           1          32          22           4           1           1
           1          32          23           1           1           1
           1          32          23           2           1           1
           1          32          23           3           1           1
           1          32          23           4           1           1
           1          32          24           1           2           1
           1          32          24           2           2           1
           1          32          24           3           2           1
           1          32          24           4           1           1
           1          32          25           1           1           1
           1          32          25           2           2           1
           1          32          25           3           1           1
           1          32          25           4           1           1
           1          32          26           1           1           1
           1          32          26           2           1           1
           1          32          26           3           1           1
           1          32          26           4           1           1
           1          32          27           1           2           1
           1          32          27           2           1           1
           1          32          27           3           2           1
           1          32          27           4           1           1
           1          32          28           1           2           1
           1          32          28           2           2           1
           1          32          28           3           1           1
           1          32          28           4           2           1
           1          32          29           1           1           1
           1          32          29           2           2           1
           1          32          29           3           1           1
           1          32          29           4           2           1
           1          32          30           1           2           1
           1          32          30           2           1           1
           1          32          30           3           1           1
           1          32          30           4           1           1
           1          32          31           1           2           1
           1          32          31           2           1           1
           1          32          31           3           2           1
           1          32          31           4           1           1
           1          32          32           1           1           1
           1          32          32           2           1           1
           1          32          32           3           2           1
           1          32          32           4           2           1
           2           1           1           1           1           1
           2           1           1           2           1           1
           2           1           1           3           1           1
           2           1           1           4           1           1
           2           1           2           1           1           1
           2           1           2           2           1           1
           2           1           2           3           1           1
           2           1           2           4           1           1
           2           1           3           1           1           1
           2           1           3           2           1           1
           2           1           3           3           1           1
           2           1           3           4           1           1
           2           1           4           1           1           1
           2           1           4           2           1           1
           2           1           4           3           1           1
           2           1           4           4           2           1
           2           1           5           1           2           1
           2           1           5           2           1           1
           2           1           5           3           1           1
           2           1           5           4           1           1
           2           1           6           1           1           1
           2           1           6           2           1           1
           2           1           6           3           1           1
           2           1           6           4           1           1
           2           1           7           1           2           1
           2           1           7           2           2           1
           2           1           7           3           2           1
           2           1           7           4           2           1
           2           1           8           1           2           1
           2           1           8           2           1           1
           2           1           8           3           1           1
           2           1           8           4           1           1
           2           1           9           1           1           1
           2           1           9           2           1           1
           2           1           9           3           1           1
           2           1           9           4           1           1
           2           1          10           1           1           1
           2           1          10           2           1           1
           2           1          10           3           1           1
           2           1          10           4           1           1
           2           1          11           1           1           1
           2           1          11           2           2           1
           2           1          11           3           1           1
           2           1          11           4           2           1
           2           1          12           1           1           1
           2           1          12           2           1           1
           2           1          12           3           1           1
           2           1          12           4           2           1
           2           1          13           1           2           1
           2           1          13           2           2           1
           2           1          13           3           1           1
           2           1          13           4           1           1
           2           1          14           1           2           1
           2           1          14           2           1           1
           2           1          14           3           1           1
           2           1          14           4           1           1
           2           1          15           1           1           1
           2           1          15           2           2           1
           2           1          15           3           2           1
           2           1          15           4           1           1
           2           1          16           1           1           1
           2           1          16           2           1           1
           2           1          16           3           1           1
           2           1          16           4           1           1
           2           1          17           1           1           1
           2           1          17           2           1           1
           2           1          17           3           2           1
           2           1          17           4           1           1
           2           1          18           1           2           1
           2           1          18           2           1           1
           2           1          18           3           1           1
           2           1          18           4           1           1
           2           1          19           1           1           1
           2           1          19           2           1           1
           2           1          19           3           2           1
           2           1          19           4           1           1
           2           1          20           1           2           1
           2           1          20           2           1           1
           2           1          20           3           1           1
           2           1          20           4           1           1
           2           1          21           1           1           1
           2           1          21           2           2           1
           2           1          21           3           2           1
           2           1          21           4           1           1
           2           1          22           1           1           1
           2           1          22           2           2           1
           2           1          22           3           2           1
           2           1          22           4           1           1
           2           1          23           1           1           1
           2           1          23           2           1           1
           2           1          23           3           1           1
           2           1          23           4           1           1
           2           1          24           1           1           1
           2           1          24           2           1           1
           2           1          24           3           1           1
           2           1          24           4           1           1
           2           1          25           1           1           1
           2           1          25           2           2           1
           2           1          25           3           1           1
           2           1          25           4           1           1
           2           1          26           1           2           1
           2           1          26           2           1           1
           2           1          26           3           1           1
           2           1          26           4           2           1
           2           1          27           1           2           1
           2           1          27           2           1           1
           2           1          27           3           1           1
           2           1          27           4           1           1
           2           1          28           1           1           1
           2           1          28           2           1           1
           2           1          28           3           1           1
           2           1          28           4           1           1
           2           1          29           1           1           1
           2           1          29           2           2           1
           2           1          29           3           2           1
           2           1          29           4           1           1
           2           1          30           1           1           1
           2           1          30           2           2           1
           2           1          30           3           2           1
           2           1          30           4           1           1
           2           1          31           1           1           1
           2           1          31           2           1           1
           2           1          31           3           1           1
           2           1          31           4           1           1
           2           1          32           1           1           1
           2           1          32           2           2           1
           2           1          32           3           1           1
           2           1          32           4           1           1
           2           2           1           1           1           1
           2           2           1           2           1           1
           2           2           1           3           2           1
           2           2           1           4           2           1
           2           2           2           1           2           1
           2           2           2           2           1           1
           2           2           2           3           1           1
           2           2           2           4           1           1
           2           2           3           1           1           1
           2           2           3           2           2           1
           2           2           3           3           2           1
           2           2           3           4           2           1
           2           2           4           1           1           1
           2           2           4           2           2           1
           2           2           4           3           1           1
           2           2           4           4           1           1
           2           2           5           1           2           1
           2           2           5           2           1           1
           2           2           5           3           1           1
           2           2           5           4           1           1
           2           2           6           1           1           1
           2           2           6           2           1           1
           2           2           6           3           1           1
           2           2           6           4           2           1
           2           2           7           1           1           1
           2           2           7           2           1           1
           2           2           7           3           1           1
           2           2           7           4           1           1
           2           2           8           1           1           1
           2           2           8           2           1           1
           2           2           8           3           1           1
           2           2           8           4           2           1
           2           2           9           1           1           1
           2           2           9           2           1           1
           2           2           9           3           1           1
           2           2           9           4           1           1
           2           2          10           1           1           1
           2           2          10           2           1           1
           2           2          10           3           1           1
           2           2          10           4           1           1
           2           2          11           1           1           1
           2           2          11           2           1           1
           2           2          11           3           1           1
           2           2          11           4           2           1
           2           2          12           1           1           1
           2           2          12           2           1           1
           2           2          12           3           1           1
           2           2          12           4           2           1
           2           2          13           1           2           1
           2           2          13           2           1           1
           2           2          13           3           2           1
           2           2          13           4           1           1
           2           2          14           1           2           1
           2           2          14           2           1           1
           2           2          14           3           1           1
           2           2          14           4           2           1
           2           2          15           1           2           1
           2           2          15           2           1           1
           2           2          15           3           1           1
           2           2          15           4           1           1
           2           2          16           1           1           1
           2           2          16           2           1           1
           2           2          16           3           1           1
           2           2          16           4           2           1
           2           2          17           1           2           1
           2           2          17           2           2           1
           2           2          17           3           1           1
           2           2          17           4           1           1
           2           2          18           1           1           1
           2           2          18           2           2           1
           2           2          18           3           1           1
           2           2          18           4           1           1
           2           2          19           1           1           1
           2           2          19           2           1           1
           2           2          19           3           1           1
           2           2          19           4           1           1
           2           2          20           1           2           1
           2           2          20           2           1           1
           2           2          20           3           2           1
           2           2          20           4           2           1
           2           2          21           1           1           1
           2           2          21           2           1           1
           2           2          21           3           1           1
           2           2          21           4           1           1
           2           2          22           1           2           1
           2           2          22           2           1           1
           2           2          22           3           1           1
           2           2          22           4           1           1
           2           2          23           1           2           1
           2           2          23           2           1           1
           2           2          23           3           1           1
           2           2          23           4           1           1
           2           2          24           1           2           1
           2           2          24           2           2           1
           2           2          24           3           2           1
           2           2          24           4           1           1
           2           2          25           1           1           1
           2           2          25           2           2           1
           2           2          25           3           2           1
           2           2          25           4           1           1
           2           2          26           1           2           1
           2           2          26           2           2           1
           2           2          26           3           2           1
           2           2          26           4           1           1
           2           2          27           1           1           1
           2           2          27           2           1           1
           2           2          27           3           1           1
           2           2          27           4           1           1
           2           2          28           1           1           1
           2           2          28           2           1           1
           2           2          28           3           1           1
           2           2          28           4           2           1
           2           2          29           1           1           1
           2           2          29           2           1           1
           2           2          29           3           1           1
           2           2          29           4           1           1
           2           2          30           1           1           1
           2           2          30           2           2           1
           2           2          30           3           2           1
           2           2          30           4           1           1
           2           2          31           1           1           1
           2           2          31           2           1           1
           2           2          31           3           1           1
           2           2          31           4           2           1
           2           2          32           1           1           1
           2           2          32           2           2           1
           2           2          32           3           1           1
           2           2          32           4           2           1
           2           3           1           1           1           1
           2           3           1           2           1           1
           2           3           1           3           1           1
           2           3           1           4           2           1
           2           3           2           1           1           1
           2           3           2           2           1           1
           2           3           2           3           1           1
           2           3           2           4           1           1
           2           3           3           1           1           1
           2           3           3           2           2           1
           2           3           3           3           2           1
           2           3           3           4           2           1
           2           3           4           1           1           1
           2           3           4           2           2           1
           2           3           4           3           1           1
           2           3           4           4           1           1
           2           3           5           1           2           1
           2           3           5           2           2           1
           2           3           5           3           1           1
           2           3           5           4           1           1
           2           3           6           1           1           1
           2           3           6           2           1           1
           2           3           6           3           1           1
           2           3           6           4           2           1
           2           3           7           1           1           1
           2           3           7           2           1           1
           2           3           7           3           1           1
           2           3           7           4           2           1
           2           3           8           1           1           1
           2           3           8           2           1           1
           2           3           8           3           1           1
           2           3           8           4           1           1
           2           3           9           1           2           1
           2           3           9           2           2           1
           2           3           9           3           1           1
           2           3           9           4           1           1
           2           3          10           1           1           1
           2           3          10           2           1           1
           2           3          10           3           2           1
           2           3          10           4           2           1
           2           3          11           1           1           1
           2           3          11           2           1           1
           2           3          11           3           2           1
           2           3          11           4           2           1
           2           3          12           1           1           1
           2           3          12           2           1           1
           2           3          12           3           1           1
           2           3          12           4           1           1
           2           3          13           1           1           1
           2           3          13           2           2           1
           2           3          13           3           1           1
           2           3          13           4           1           1
           2           3          14           1           1           1
           2           3          14           2           1           1
           2           3          14           3           1           1
           2           3          14           4           2           1
           2           3          15           1           1           1
           2           3          15           2           2           1
           2           3          15           3           1           1
           2           3          15           4           1           1
           2           3          16           1           2           1
           2           3          16           2           1           1
           2           3          16           3           2           1
           2           3          16           4           2           1
           2           3          17           1           1           1
           2           3          17           2           1           1
           2           3          17           3           1           1
           2           3          17           4           1           1
           2           3          18           1           2           1
           2           3          18           2           2           1
           2           3          18           3           1           1
           2           3          18           4           1           1
           2           3          19           1           2           1
           2           3          19           2           2           1
           2           3          19           3           1           1
           2           3          19           4           2           1
           2           3          20           1           1           1
           2           3          20           2           2           1
           2           3          20           3           1           1
           2           3          20           4           1           1
           2           3          21           1           1           1
           2           3          21           2           1           1
           2           3          21           3           2           1
           2           3          21           4           1           1
           2           3          22           1           1           1
           2           3          22           2           1           1
           2           3          22           3           1           1
           2           3          22           4           1           1
           2           3          23           1           1           1
           2           3          23           2           1           1
           2           3          23           3           1           1
           2           3          23           4           1           1
           2           3          24           1           1           1
           2           3          24           2           1           1
           2           3          24           3           1           1
           2           3          24           4           1           1
           2           3          25           1           1           1
           2           3          25           2           1           1
           2           3          25           3           1           1
           2           3          25           4           2           1
           2           3          26           1           2           1
           2           3          26           2           2           1
           2           3          26           3           2           1
           2           3          26           4           1           1
           2           3          27           1           1           1
           2           3          27           2           1           1
           2           3          27           3           1           1
           2           3          27           4           2           1
           2           3          28           1           2           1
           2           3          28           2           2           1
           2           3          28           3           1           1
           2           3          28           4           2           1
           2           3          29           1           2           1
           2           3          29           2           1           1
           2           3          29           3           2           1
           2           3          29           4           1           1
           2           3          30           1           1           1
           2           3          30           2           2           1
           2           3          30           3           1           1
           2           3          30           4           1           1
           2           3          31           1           1           1
           2           3          31           2           1           1
           2           3          31           3           2           1
           2           3          31           4           2           1
           2           3          32           1           1           1
           2           3          32           2           1           1
           2           3          32           3           1           1
           2           3          32           4           1           1
           2           4           1           1           2           1
           2           4           1           2           2           1
           2           4           1           3           1           1
           2           4           1           4           1           1
           2           4           2           1           1           1
           2           4           2           2           1           1
           2           4           2           3           1           1
           2           4           2           4           1           1
           2           4           3           1           1           1
           2           4           3           2           2           1
           2           4           3           3           2           1
           2           4           3           4           1           1
           2           4           4           1           1           1
           2           4           4           2           1           1
           2           4           4           3           1           1
           2           4           4           4           1           1
           2           4           5           1           1           1
           2           4           5           2           2           1
           2           4           5           3           1           1
           2           4           5           4           1           1
           2           4           6           1           1           1
           2           4           6           2           1           1
           2           4           6           3           1           1
           2           4           6           4           2           1
           2           4           7           1           2           1
           2           4           7           2           2           1
           2           4           7           3           1           1
           2           4           7           4           2           1
           2           4           8           1           2           1
           2           4           8           2           1           1
           2           4           8           3           1           1
           2           4           8           4           1           1
           2           4           9           1           1           1
           2           4           9           2           1           1
           2           4           9           3           2           1
           2           4           9           4           1           1
           2           4          10           1           1           1
           2           4          10           2           1           1
           2           4          10           3           1           1
           2           4          10           4           1           1
           2           4          11           1           1           1
           2           4          11           2           1           1
           2           4          11           3           1           1
           2           4          11           4           1           1
           2           4          12           1           2           1
           2           4          12           2           1           1
           2           4          12           3           2           1
           2           4          12           4           2           1
           2           4          13           1           2           1
           2           4          13           2           1           1
           2           4          13           3           1           1
           2           4          13           4           2           1
           2           4          14           1           1           1
           2           4          14           2           2           1
           2           4          14           3           2           1
           2           4          14           4           1           1
           2           4          15           1           2           1
           2           4          15           2           1           1
           2           4          15           3           2           1
           2           4          15           4           1           1
           2           4          16           1           2           1
           2           4          16           2           2           1
           2           4          16           3           2           1
           2           4          16           4           1           1
           2           4          17           1           1           1
           2           4          17           2           1           1
           2           4          17           3           1           1
           2           4          17           4           1           1
           2           4          18           1           1           1
           2           4          18           2           2           1
           2           4          18           3           1           1
           2           4          18           4           1           1
           2           4          19           1           2           1
           2           4          19           2           1           1
           2           4          19           3           1           1
           2           4          19           4           2           1
           2           4          20           1           1           1
           2           4          20           2           1           1
           2           4          20           3           2           1
           2           4          20           4           2           1
           2           4          21           1           1           1
           2           4          21           2           1           1
           2           4          21           3           1           1
           2           4          21           4           1           1
           2           4          22           1           2           1
           2           4          22           2           2           1
           2           4          22           3           1           1
           2           4          22           4           1           1
           2           4          23           1           1           1
           2           4          23           2           2           1
           2           4          23           3           1           1
           2           4          23           4           1           1
           2           4          24           1           1           1
           2           4          24           2           1           1
           2           4          24           3           1           1
           2           4          24           4           1           1
           2           4          25           1           2           1
           2           4          25           2           1           1
           2           4          25           3           1           1
           2           4          25           4           1           1
           2           4          26           1           2           1
           2           4          26           2           1           1
           2           4          26           3           1           1
           2           4          26           4           1           1
           2           4          27           1           1           1
           2           4          27           2           1           1
           2           4          27           3           2           1
           2           4          27           4           2           1
           2           4          28           1           2           1
           2           4          28           2           1           1
           2           4          28           3           1           1
           2           4          28           4           1           1
           2           4          29           1           1           1
           2           4          29           2           1           1
           2           4          29           3           1           1
           2           4          29           4           1           1
           2           4          30           1           1           1
           2           4          30           2           1           1
           2           4          30           3           2           1
           2           4          30           4           1           1
           2           4          31           1           1           1
           2           4          31           2           1           1
           2           4          31           3           1           1
           2           4          31           4           1           1
           2           4          32           1           1           1
           2           4          32           2           2           1
           2           4          32           3           1           1
           2           4          32           4           2           1
           2           5           1           1           1           1
           2           5           1           2           1           1
           2           5           1           3           2           1
           2           5           1           4           1           1
           2           5           2           1           1           1
           2           5           2           2           1           1
           2           5           2           3           1           1
           2           5           2           4           1           1
           2           5           3           1           1           1
           2           5           3           2           2           1
           2           5           3           3           1           1
           2           5           3           4           2           1
           2           5           4           1           1           1
           2           5           4           2           2           1
           2           5           4           3           1           1
           2           5           4           4           1           1
           2           5           5           1           2           1
           2           5           5           2           1           1
           2           5           5           3           1           1
           2           5           5           4           1           1
           2           5           6           1           2           1
           2           5           6           2           2           1
           2           5           6           3           1           1
           2           5           6           4           2           1
           2           5           7           1           1           1
           2           5           7           2           1           1
           2           5           7           3           1           1
           2           5           7           4           1           1
           2           5           8           1           1           1
           2           5           8           2           2           1
           2           5           8           3           1           1
           2           5           8           4           1           1
           2           5           9           1           1           1
           2           5           9           2           2           1
           2           5           9           3           2           1
           2           5           9           4           2           1
           2           5          10           1           1           1
           2           5          10           2           2           1
           2           5          10           3           2           1
           2           5          10           4           1           1
           2           5          11           1           1           1
           2           5          11           2           2           1
           2           5          11           3           2           1
           2           5          11           4           2           1
           2           5          12           1           2           1
           2           5          12           2           1           1
           2           5          12           3           1           1
           2           5          12           4           1           1
           2           5          13           1           1           1
           2           5          13           2           1           1
           2           5          13           3           1           1
           2           5          13           4           2           1
           2           5          14           1           1           1
           2           5          14           2           1           1
           2           5          14           3           2           1
           2           5          14           4           1           1
           2           5          15           1           1           1
           2           5          15           2           1           1
           2           5          15           3           1           1
           2           5          15           4           1           1
           2           5          16           1           1           1
           2           5          16           2           1           1
           2           5          16           3           1           1
           2           5          16           4           1           1
           2           5          17           1           1           1
           2           5          17           2           1           1
           2           5          17           3           1           1
           2           5          17           4           2           1
           2           5          18           1           2           1
           2           5          18           2           2           1
           2           5          18           3           1           1
           2           5          18           4           1           1
           2           5          19           1           2           1
           2           5          19           2           1           1
           2           5          19           3           1           1
           2           5          19           4           2           1
           2           5          20           1           1           1
           2           5          20           2           1           1
           2           5          20           3           2           1
           2           5          20           4           2           1
           2           5          21           1           1           1
           2           5          21           2           1           1
           2           5          21           3           1           1
           2           5          21           4           2           1
           2           5          22           1           2           1
           2           5          22           2           2           1
           2           5          22           3           2           1
           2           5          22           4           1           1
           2           5          23           1           2           1
           2           5          23           2           1           1
           2           5          23           3           1           1
           2           5          23           4           1           1
           2           5          24           1           1           1
           2           5          24           2           2           1
           2           5          24           3           1           1
           2           5          24           4           1           1
           2           5          25           1           2           1
           2           5          25           2           2           1
           2           5          25           3           1           1
           2           5          25           4           1           1
           2           5          26           1           1           1
           2           5          26           2           1           1
           2           5          26           3           1           1
           2           5          26           4           2           1
           2           5          27           1           2           1
           2           5          27           2           1           1
           2           5          27           3           1           1
           2           5          27           4           1           1
           2           5          28           1           1           1
           2           5          28           2           1           1
           2           5          28           3           1           1
           2           5          28           4           2           1
           2           5          29           1           2           1
           2           5          29           2           1           1
           2           5          29           3           1           1
           2           5          29           4           2           1
           2           5          30           1           1           1
           2           5          30           2           1           1
           2           5          30           3           1           1
           2           5          30           4           1           1
           2           5          31           1           1           1
           2           5          31           2           2           1
           2           5          31           3           1           1
           2           5          31           4           1           1
           2           5          32           1           2           1
           2           5          32           2           1           1
           2           5          32           3           1           1
           2           5          32           4           1           1
           2           6           1           1           2           1
           2           6           1           2           2           1
           2           6           1           3           1           1
           2           6           1           4           1           1
           2           6           2           1           1           1
           2           6           2           2           1           1
           2           6           2           3           1           1
           2           6           2           4           1           1
           2           6           3           1           1           1
           2           6           3           2           2           1
           2           6           3           3           1           1
           2           6           3           4           1           1
           2           6           4           1           1           1
           2           6           4           2           2           1
           2           6           4           3           1           1
           2           6           4           4           1           1
           2           6           5           1           2           1
           2           6           5           2           2           1
           2           6           5           3           2           1
           2           6           5           4           2           1
           2           6           6           1           1           1
           2           6           6           2           2           1
           2           6           6           3           2           1
           2           6           6           4           1           1
           2           6           7           1           1           1
           2           6           7           2           2           1
           2           6           7           3           1           1
           2           6           7           4           1           1
           2           6           8           1           1           1
           2           6           8           2           1           1
           2           6           8           3           2           1
           2           6           8           4           2           1
           2           6           9           1           1           1
           2           6           9           2           2           1
           2           6           9           3           2           1
           2           6           9           4           1           1
           2           6          10           1           2           1
           2           6          10           2           2           1
           2           6          10           3           2           1
           2           6          10           4           1           1
           2           6          11           1           2           1
           2           6          11           2           2           1
           2           6          11           3           1           1
           2           6          11           4           1           1
           2           6          12           1           1           1
           2           6          12           2           1           1
           2           6          12           3           1           1
           2           6          12           4           1           1
           2           6          13           1           1           1
           2           6          13           2           1           1
           2           6          13           3           2           1
           2           6          13           4           1           1
           2           6          14           1           1           1
           2           6          14           2           1           1
           2           6          14           3           1           1
           2           6          14           4           1           1
           2           6          15           1           1           1
           2           6          15           2           1           1
           2           6          15           3           1           1
           2           6          15           4           1           1
           2           6          16           1           1           1
           2           6          16           2           1           1
           2           6          16           3           1           1
           2           6          16           4           1           1
           2           6          17           1           2           1
           2           6          17           2           1           1
           2           6          17           3           1           1
           2           6          17           4           2           1
           2           6          18           1           1           1
           2           6          18           2           1           1
           2           6          18           3           2           1
           2           6          18           4           2           1
           2           6          19           1           1           1
           2           6          19           2           1           1
           2           6          19           3           1           1
           2           6          19           4           1           1
           2           6          20           1           2           1
           2           6          20           2           2           1
           2           6          20           3           2           1
           2           6          20           4           1           1
           2           6          21           1           1           1
           2           6          21           2           1           1
           2           6          21           3           2           1
           2           6          21           4           2           1
           2           6          22           1           2           1
           2           6          22           2           2           1
           2           6          22           3           2           1
           2           6          22           4           2           1
           2           6          23           1           1           1
           2           6          23           2           1           1
           2           6          23           3           1           1
           2           6          23           4           1           1
           2           6          24           1           1           1
           2           6          24           2           1           1
           2           6          24           3           2           1
           2           6          24           4           2           1
           2           6          25           1           1           1
           2           6          25           2           2           1
           2           6          25           3           1           1
           2           6          25           4           1           1
           2           6          26           1           1           1
           2           6          26           2           1           1
           2           6          26           3           1           1
           2           6          26           4           1           1
           2           6          27           1           1           1
           2           6          27           2           2           1
           2           6          27           3           2           1
           2           6          27           4           1           1
           2           6          28           1           1           1
           2           6          28           2           1           1
           2           6          28           3           2           1
           2           6          28           4           2           1
           2           6          29           1           1           1
           2           6          29           2           1           1
           2           6          29           3           1           1
           2           6          29           4           1           1
           2           6          30           1           1           1
           2           6          30           2           2           1
           2           6          30           3           1           1
           2           6          30           4           1           1
           2           6          31           1           1           1
           2           6          31           2           1           1
           2           6          31           3           1           1
           2           6          31           4           1           1
           2           6          32           1           2           1
           2           6          32           2           1           1
           2           6          32           3           1           1
           2           6          32           4           2           1
           2           7           1           1           1           1
           2           7           1           2           2           1
           2           7           1           3           1           1
           2           7           1           4           1           1
           2           7           2           1           1           1
           2           7           2           2           1           1
           2           7           2           3           1           1
           2           7           2           4           2           1
           2           7           3           1           2           1
           2           7           3           2           2           1
           2           7           3           3           1           1
           2           7           3           4           1           1
           2           7           4           1           2           1
           2           7           4           2           2           1
           2           7           4           3           1           1
           2           7           4           4           1           1
           2           7           5           1           1           1
           2           7           5           2           1           1
           2           7           5           3           1           1
           2           7           5           4           2           1
           2           7           6           1           1           1
           2           7           6           2           2           1
           2           7           6           3           1           1
           2           7           6           4           2           1
           2           7           7           1           2           1
           2           7           7           2           1           1
           2           7           7           3           1           1
           2           7           7           4           1           1
           2           7           8           1           1           1
           2           7           8           2           2           1
           2           7           8           3           1           1
           2           7           8           4           2           1
           2           7           9           1           2           1
           2           7           9           2           1           1
           2           7           9           3           1           1
           2           7           9           4           1           1
           2           7          10           1           1           1
           2           7          10           2           2           1
           2           7          10           3           2           1
           2           7          10           4           1           1
           2           7          11           1           2           1
           2           7          11           2           2           1
           2           7          11           3           1           1
           2           7          11           4           2           1
           2           7          12           1           1           1
           2           7          12           2           1           1
           2           7          12           3           1           1
           2           7          12           4           2           1
           2           7          13           1           1           1
           2           7          13           2           1           1
           2           7          13           3           2           1
           2           7          13           4           1           1
           2           7          14           1           1           1
           2           7          14           2           2           1
           2           7          14           3           2           1
           2           7          14           4           1           1
           2           7          15           1           1           1
           2           7          15           2           1           1
           2           7          15           3           1           1
           2           7          15           4           1           1
           2           7          16           1           1           1
           2           7          16           2           2           1
           2           7          16           3           1           1
           2           7          16           4           2           1
           2           7          17           1           1           1
           2           7          17           2           1           1
           2           7          17           3           1           1
           2           7          17           4           1           1
           2           7          18           1           1           1
           2           7          18           2           1           1
           2           7          18           3           1           1
           2           7          18           4           1           1
           2           7          19           1           1           1
           2           7          19           2           1           1
           2           7          19           3           1           1
           2           7          19           4           1           1
           2           7          20           1           1           1
           2           7          20           2           2           1
           2           7          20           3           1           1
           2           7          20           4           2           1
           2           7          21           1           1           1
           2           7          21           2           2           1
           2           7          21           3           2           1
           2           7          21           4           2           1
           2           7          22           1           1           1
           2           7          22           2           1           1
           2           7          22           3           2           1
           2           7          22           4           2           1
           2           7          23           1           1           1
           2           7          23           2           1           1
           2           7          23           3           2           1
           2           7          23           4           1           1
           2           7          24           1           1           1
           2           7          24           2           2           1
           2           7          24           3           1           1
           2           7          24           4           1           1
           2           7          25           1           2           1
           2           7          25           2           2           1
           2           7          25           3           1           1
           2           7          25           4           1           1
           2           7          26           1           2           1
           2           7          26           2           1           1
           2           7          26           3           1           1
           2           7          26           4           2           1
           2           7          27           1           2           1
           2           7          27           2           1           1
           2           7          27           3           1           1
           2           7          27           4           1           1
           2           7          28           1           2           1
           2           7          28           2           1           1
           2           7          28           3           1           1
           2           7          28           4           2           1
           2           7          29           1           1           1
           2           7          29           2           1           1
           2           7          29           3           1           1
           2           7          29           4           1           1
           2           7          30           1           1           1
           2           7          30           2           2           1
           2           7          30           3           2           1
           2           7          30           4           1           1
           2           7          31           1           2           1
           2           7          31           2           2           1
           2           7          31           3           2           1
           2           7          31           4           1           1
           2           7          32           1           1           1
           2           7          32           2           2           1
           2           7          32           3           2           1
           2           7          32           4           2           1
           2           8           1           1           1           1
           2           8           1           2           1           1
           2           8           1           3           1           1
           2           8           1           4           2           1
           2           8           2           1           2           1
           2           8           2           2           2           1
           2           8           2           3           1           1
           2           8           2           4           1           1
           2           8           3           1           1           1
           2           8           3           2           1           1
           2           8           3           3           1           1
           2           8           3           4           1           1
           2           8           4           1           1           1
           2           8           4           2           1           1
           2           8           4           3           2           1
           2           8           4           4           1           1
           2           8           5           1           2           1
           2           8           5           2           2           1
           2           8           5           3           1           1
           2           8           5           4           1           1
           2           8           6           1           1           1
           2           8           6           2           1           1
           2           8           6           3           1           1
           2           8           6           4           1           1
           2           8           7           1           1           1
           2           8           7           2           1           1
           2           8           7           3           1           1
           2           8           7           4           1           1
           2           8           8           1           1           1
           2           8           8           2           2           1
           2           8           8           3           1           1
           2           8           8           4           1           1
           2           8           9           1           1           1
           2           8           9           2           1           1
           2           8           9           3           1           1
           2           8           9           4           1           1
           2           8          10           1           2           1
           2           8          10           2           2           1
           2           8          10           3           1           1
           2           8          10           4           2           1
           2           8          11           1           1           1
           2           8          11           2           1           1
           2           8          11           3           1           1
           2           8          11           4           1           1
           2           8          12           1           1           1
           2           8          12           2           1           1
           2           8          12           3           2           1
           2           8          12           4           1           1
           2           8          13           1           2           1
           2           8          13           2           1           1
           2           8          13           3           1           1
           2           8          13           4           2           1
           2           8          14           1           2           1
           2           8          14           2           1           1
           2           8          14           3           1           1
           2           8          14           4           2           1
           2           8          15           1           1           1
           2           8          15           2           1           1
           2           8          15           3           2           1
           2           8          15           4           1           1
           2           8          16           1           1           1
           2           8          16           2           1           1
           2           8          16           3           2           1
           2           8          16           4           1           1
           2           8          17           1           1           1
           2           8          17           2           1           1
           2           8          17           3           1           1
           2           8          17           4           2           1
           2           8          18           1           1           1
           2           8          18           2           1           1
           2           8          18           3           2           1
           2           8          18           4           1           1
           2           8          19           1           2           1
           2           8          19           2           1           1
           2           8          19           3           1           1
           2           8          19           4           2           1
           2           8          20           1           1           1
           2           8          20           2           2           1
           2           8          20           3           2           1
           2           8          20           4           1           1
           2           8          21           1           1           1
           2           8          21           2           2           1
           2           8          21           3           1           1
           2           8          21           4           1           1
           2           8          22           1           1           1
           2           8          22           2           1           1
           2           8          22           3           1           1
           2           8          22           4           1           1
           2           8          23           1           1           1
           2           8          23           2           1           1
           2           8          23           3           1           1
           2           8          23           4           1           1
           2           8          24           1           1           1
           2           8          24           2           2           1
           2           8          24           3           1           1
           2           8          24           4           1           1
           2           8          25           1           2           1
           2           8          25           2           1           1
           2           8          25           3           1           1
           2           8          25           4           1           1
           2           8          26           1           2           1
           2           8          26           2           2           1
           2           8          26           3           2           1
           2           8          26           4           2           1
           2           8          27           1           2           1
           2           8          27           2           1           1
           2           8          27           3           1           1
           2           8          27           4           2           1
           2           8          28           1           1           1
           2           8          28           2           1           1
           2           8          28           3           1           1
           2           8          28           4           1           1
           2           8          29           1           1           1
           2           8          29           2           1           1
           2           8          29           3           1           1
           2           8          29           4           1           1
           2           8          30           1           1           1
           2           8          30           2           1           1
           2           8          30           3           1           1
           2           8          30           4           2           1
           2           8          31           1           1           1
           2           8          31           2           2           1
           2           8          31           3           1           1
           2           8          31           4           1           1
           2           8          32           1           1           1
           2           8          32           2           1           1
           2           8          32           3           1           1
           2           8          32           4           1           1
           2           9           1           1           1           1
           2           9           1           2           1           1
           2           9           1           3           2           1
           2           9           1           4           1           1
           2           9           2           1           2           1
           2           9           2           2           2           1
           2           9           2           3           1           1
           2           9           2           4           2           1
           2           9           3           1           1           1
           2           9           3           2           1           1
           2           9           3           3           2           1
           2           9           3           4           2           1
           2           9           4           1           1           1
           2           9           4           2           2           1
           2           9           4           3           1           1
           2           9           4           4           1           1
           2           9           5           1           1           1
           2           9           5           2           2           1
           2           9           5           3           1           1
           2           9           5           4           2           1
           2           9           6           1           1           1
           2           9           6           2           1           1
           2           9           6           3           2           1
           2           9           6           4           1           1
           2           9           7           1           1           1
           2           9           7           2           1           1
           2           9           7           3           1           1
           2           9           7           4           2           1
           2           9           8           1           1           1
           2           9           8           2           1           1
           2           9           8           3           1           1
           2           9           8           4           1           1
           2           9           9           1           1           1
           2           9           9           2           1           1
           2           9           9           3           1           1
           2           9           9           4           1           1
           2           9          10           1           2           1
           2           9          10           2           1           1
           2           9          10           3           1           1
           2           9          10           4           2           1
           2           9          11           1           1           1
           2           9          11           2           1           1
           2           9          11           3           2           1
           2           9          11           4           1           1
           2           9          12           1           2           1
           2           9          12           2           1           1
           2           9          12           3           1           1
           2           9          12           4           1           1
           2           9          13           1           2           1
           2           9          13           2           1           1
           2           9          13           3           2           1
           2           9          13           4           1           1
           2           9          14           1           1           1
           2           9          14           2           2           1
           2           9          14           3           1           1
           2           9          14           4           1           1
           2           9          15           1           2           1
           2           9          15           2           1           1
           2           9          15           3           2           1
           2           9          15           4           1           1
           2           9          16           1           1           1
           2           9          16           2           2           1
           2           9          16           3           1           1
           2           9          16           4           1           1
           2           9          17           1           1           1
           2           9          17           2           1           1
           2           9          17           3           2           1
           2           9          17           4           1           1
           2           9          18           1           1           1
           2           9          18           2           2           1
           2           9          18           3           1           1
           2           9          18           4           1           1
           2           9          19           1           2           1
           2           9          19           2           1           1
           2           9          19           3           1           1
           2           9          19           4           1           1
           2           9          20           1           2           1
           2           9          20           2           1           1
           2           9          20           3           1           1
           2           9          20           4           1           1
           2           9          21           1           1           1
           2           9          21           2           2           1
           2           9          21           3           2           1
           2           9          21           4           1           1
           2           9          22           1           1           1
           2           9          22           2           1           1
           2           9          22           3           1           1
           2           9          22           4           1           1
           2           9          23           1           2           1
           2           9          23           2           1           1
           2           9          23           3           1           1
           2           9          23           4           1           1
           2           9          24           1           1           1
           2           9          24           2           1           1
           2           9          24           3           1           1
           2           9          24           4           1           1
           2           9          25           1           1           1
           2           9          25           2           1           1
           2           9          25           3           1           1
           2           9          25           4           1           1
           2           9          26           1           1           1
           2           9          26           2           1           1
           2           9          26           3           1           1
           2           9          26           4           1           1
           2           9          27           1           1           1
           2           9          27           2           1           1
           2           9          27           3           1           1
           2           9          27           4           1           1
           2           9          28           1           1           1
           2           9          28           2           1           1
           2           9          28           3           1           1
           2           9          28           4           1           1
           2           9          29           1           2           1
           2           9          29           2           1           1
           2           9          29           3           1           1
           2           9          29           4           1           1
           2           9          30           1           2           1
           2           9          30           2           2           1
           2           9          30           3           1           1
           2           9          30           4           1           1
           2           9          31           1           1           1
           2           9          31           2           2           1
           2           9          31           3           2           1
           2           9          31           4           1           1
           2           9          32           1           2           1
           2           9          32           2           2           1
           2           9          32           3           2           1
           2           9          32           4           1           1
           2          10           1           1           1           1
           2          10           1           2           1           1
           2          10           1           3           1           1
           2          10           1           4           2           1
           2          10           2           1           1           1
           2          10           2           2           1           1
           2          10           2           3           1           1
           2          10           2           4           1           1
           2          10           3           1           1           1
           2          10           3           2           1           1
           2          10           3           3           1           1
           2          10           3           4           2           1
           2          10           4           1           1           1
           2          10           4           2           1           1
           2          10           4           3           1           1
           2          10           4           4           2           1
           2          10           5           1           2           1
           2          10           5           2           1           1
           2          10           5           3           2           1
           2          10           5           4           1           1
           2          10           6           1           2           1
           2          10           6           2           1           1
           2          10           6           3           2           1
           2          10           6           4           1           1
           2          10           7           1           1           1
           2          10           7           2           2           1
           2          10           7           3           2           1
           2          10           7           4           1           1
           2          10           8           1           2           1
           2          10           8           2           1           1
           2          10           8           3           2           1
           2          10           8           4           1           1
           2          10           9           1           2           1
           2          10           9           2           1           1
           2          10           9           3           1           1
           2          10           9           4           2           1
           2          10          10           1           1           1
           2          10          10           2           1           1
           2          10          10           3           1           1
           2          10          10           4           1           1
           2          10          11           1           1           1
           2          10          11           2           1           1
           2          10          11           3           2           1
           2          10          11           4           1           1
           2          10          12           1           2           1
           2          10          12           2           1           1
           2          10          12           3           1           1
           2          10          12           4           1           1
           2          10          13           1           1           1
           2          10          13           2           2           1
           2          10          13           3           2           1
           2          10          13           4           2           1
           2          10          14           1           2           1
           2          10          14           2           1           1
           2          10          14           3           2           1
           2          10          14           4           1           1
           2          10          15           1           1           1
           2          10          15           2           1           1
           2          10          15           3           1           1
           2          10          15           4           2           1
           2          10          16           1           1           1
           2          10          16           2           1           1
           2          10          16           3           1           1
           2          10          16           4           2           1
           2          10          17           1           1           1
           2          10          17           2           1           1
           2          10          17           3           2           1
           2          10          17           4           1           1
           2          10          18           1           1           1
           2          10          18           2           1           1
           2          10          18           3           1           1
           2          10          18           4           1           1
           2          10          19           1           2           1
           2          10          19           2           1           1
           2          10          19           3           1           1
           2          10          19           4           1           1
           2          10          20           1           1           1
           2          10          20           2           1           1
           2          10          20           3           1           1
           2          10          20           4           1           1
           2          10          21           1           1           1
           2          10          21           2           1           1
           2          10          21           3           1           1
           2          10          21           4           1           1
           2          10          22           1           1           1
           2          10          22           2           2           1
           2          10          22           3           1           1
           2          10          22           4           2           1
           2          10          23           1           1           1
           2          10          23           2           1           1
           2          10          23           3           1           1
           2          10          23           4           1           1
           2          10          24           1           2           1
           2          10          24           2           2           1
           2          10          24           3           1           1
           2          10          24           4           1           1
           2          10          25           1           2           1
           2          10          25           2           1           1
           2          10          25           3           1           1
           2          10          25           4           1           1
           2          10          26           1           2           1
           2          10          26           2           1           1
           2          10          26           3           2           1
           2          10          26           4           1           1
           2          10          27           1           2           1
           2          10          27           2           2           1
           2          10          27           3           1           1
           2          10          27           4           1           1
           2          10          28           1           1           1
           2          10          28           2           1           1
           2          10          28           3           1           1
           2          10          28           4           1           1
           2          10          29           1           1           1
           2          10          29           2           1           1
           2          10          29           3           1           1
           2          10          29           4           1           1
           2          10          30           1           1           1
           2          10          30           2           1           1
           2          10          30           3           1           1
           2          10          30           4           1           1
           2          10          31           1           2           1
           2          10          31           2           1           1
           2          10          31           3           1           1
           2          10          31           4           1           1
           2          10          32           1           2           1
           2          10          32           2           1           1
           2          10          32           3           1           1
           2          10          32           4           1           1
           2          11           1           1           2           1
           2          11           1           2           1           1
           2          11           1           3           2           1
           2          11           1           4           1           1
           2          11           2           1           2           1
           2          11           2           2           1           1
           2          11           2           3           1           1
           2          11           2           4           1           1
           2          11           3           1           2           1
           2          11           3           2           1           1
           2          11           3           3           1           1
           2          11           3           4           2           1
           2          11           4           1           1           1
           2          11           4           2           1           1
           2          11           4           3           2           1
           2          11           4           4           1           1
           2          11           5           1           1           1
           2          11           5           2           1           1
           2          11           5           3           1           1
           2          11           5           4           1           1
           2          11           6           1           1           1
           2          11           6           2           1           1
           2          11           6           3           2           1
           2          11           6           4           2           1
           2          11           7           1           1           1
           2          11           7           2           1           1
           2          11           7           3           2           1
           2          11           7           4           1           1
           2          11           8           1           1           1
           2          11           8           2           1           1
           2          11           8           3           1           1
           2          11           8           4           1           1
           2          11           9           1           2           1
           2          11           9           2           1           1
           2          11           9           3           1           1
           2          11           9           4           1           1
           2          11          10           1           1           1
           2          11          10           2           1           1
           2          11          10           3           1           1
           2          11          10           4           2           1
           2          11          11           1           2           1
           2          11          11           2           2           1
           2          11          11           3           1           1
           2          11          11           4           1           1
           2          11          12           1           2           1
           2          11          12           2           2           1
           2          11          12           3           1           1
           2          11          12           4           2           1
           2          11          13           1           1           1
           2          11          13           2           1           1
           2          11          13           3           1           1
           2          11          13           4           2           1
           2          11          14           1           1           1
           2          11          14           2           1           1
           2          11          14           3           1           1
           2          11          14           4           2           1
           2          11          15           1           1           1
           2          11          15           2           2           1
           2          11          15           3           1           1
           2          11          15           4           2           1
           2          11          16           1           2           1
           2          11          16           2           1           1
           2          11          16           3           2           1
           2          11          16           4           1           1
           2          11          17           1           1           1
           2          11          17           2           1           1
           2          11          17           3           1           1
           2          11          17           4           1           1
           2          11          18           1           1           1
           2          11          18           2           2           1
           2          11          18           3           1           1
           2          11          18           4           1           1
           2          11          19           1           1           1
           2          11          19           2           1           1
           2          11          19           3           2           1
           2          11          19           4           1           1
           2          11          20           1           2           1
           2          11          20           2           1           1
           2          11          20           3           1           1
           2          11          20           4           1           1
           2          11          21           1           1           1
           2          11          21           2           1           1
           2          11          21           3           1           1
           2          11          21           4           2           1
           2          11          22           1           1           1
           2          11          22           2           2           1
           2          11          22           3           1           1
           2          11          22           4           1           1
           2          11          23           1           2           1
           2          11          23           2           2           1
           2          11          23           3           1           1
           2          11          23           4           1           1
           2          11          24           1           1           1
           2          11          24           2           2           1
           2          11          24           3           1           1
           2          11          24           4           2           1
           2          11          25           1           2           1
           2          11          25           2           1           1
           2          11          25           3           1           1
           2          11          25           4           2           1
           2          11          26           1           1           1
           2          11          26           2           1           1
           2          11          26           3           2           1
[truncated: 9,168,290 more chars]
