# Supplementary material for: A Process for Modelling Diffuse Scattering from Disordered Molecular Crystals, Illustrated by Application to Monoclinic 9-Chloro-10-methylanthracene
Source: Hindawi journal article supplement (doi:10.1155/2015/878463), 2015-01-01
Supplement: f2 [file 878463.f2.zip › 878463.f2/CMA_simulations/diffuse.mono0kl_Bragg]

'CMA rhomb mono'
12645,9676                        	!Random number seeds
8.197  9.884  13.58 0.00  -0.092891935  0.00     !cell params, a, b, c, cos(al), cos(be), cos(ga)
32 32 32                      		!Size of crystal simulation (unit cells)
Y                    			!Periodic Boundary?
000.00  -9.884  -13.58                	!Origin of volume (in h,k,l)
000.00 -9.884   13.58 400               !u axis of calculated volume and number of divisions
000.00 9.884  -13.58  400               !v-axis and number of divisions
000.00 -9.884  -13.58 1                 !w-axis and number of divisions  
1.887                                   !sin(theta)/lambda maximum
25,25,25                                !lot shape in unit cells
1                                     !Number of lots
216                                     !Atoms per cell (not including dummies)
3                                       !Number of atom types
N                                       !Subtract average lattice?
'C '                                    !Scattering factor info for C
2.31,20.8439,1.02,10.2075               !from http://it.iucr.org/Cb/ch6o1v0001/sec6o1o1/?#sec6o1o1o4
1.58860,0.5687,0.865,51.6512,0.2156     !
0.0,0.0                                 !fprime, f-double-prime
'Cl'                                    !
11.4604, 0.0104, 7.1964, 1.1662	        !Scattering factor info for Cl
6.2556, 18.5194, 1.6455, 47.7784, -9.5574
0.0,0.0                                 !fprime, f-double-prime
'H '                                    !
0.0000,0.0000,0.0000,00.0000
0.0000,00.0000,0.0000,0.0000,000.000
0.0,0.0               
