# Supplementary material for: A Process for Modelling Diffuse Scattering from Disordered Molecular Crystals, Illustrated by Application to Monoclinic 9-Chloro-10-methylanthracene
Source: Hindawi journal article supplement (doi:10.1155/2015/878463), 2015-01-01
Supplement: f2 [file 878463.f2.zip › 878463.f2/CMA_simulations/diffuse.monoh0l]

'CMA rhomb mono'
12645,9676                        	!Random number seeds
8.197  9.884  13.58 0.00  -0.092891935  0.00
32 32 32                      		!Size of crystal simulation (unit cells)
Y                    			!Periodic Boundary?
-7.432  00.000  -13.64                	!Origin of volume
9.726   0.000  -13.64 400             !u-axis and divisions
-9.726 0.0000 13.64    400            !v-axis and number of divisions
-7.432  00.000  -13.64 1              !w-axis and number of divisions  
1.887                            !sin(theta)/lambda maximum
15,15,15
221                               !Number of lots
216                           !Number of atom sites per cell
3                              !Number of atom types
Y                             !Subtract average lattice?
'C '                          !
2.31,20.8439,1.02,10.2075
1.58860,0.5687,0.865,51.6512,0.2156
0.0,0.0                   !fprime, f-double-prime
'Cl'                           !
11.4604, 0.0104, 7.1964, 1.1662	        !Scattering factor info for Cl
6.2556, 18.5194, 1.6455, 47.7784, -9.5574
0.0,0.0                   !fprime, f-double-prime
'H '                           !
0.0000,0.0000,0.0000,00.0000
0.0000,00.0000,0.0000,0.0000,000.000
0.0,0.0                   !fprime, f-double-prime
