# Supplementary material for: A Process for Modelling Diffuse Scattering from Disordered Molecular Crystals, Illustrated by Application to Monoclinic 9-Chloro-10-methylanthracene
Source: Hindawi journal article supplement (doi:10.1155/2015/878463), 2015-01-01
Supplement: f2 [file 878463.f2.zip › 878463.f2/CMA_simulations/Gen_contacts.inp]

HEADER CMA monclinic generate contacts
!!
!! Crystal geometry information
!!
CRYSTAL 32 32 32
OCCFILE CMA_initial_random_occ.txt
ZMATFILE  1 with_CH3_1.zmat
QXYZFILE  1 with_CH3_1.qxyz
ZMATFILE  2 with_CH3_2.zmat
QXYZFILE  2 with_CH3_2.qxyz
CELL  8.1970    9.8840   13.5800   90.0000   95.3300   90.0000 
!!
!! Initial randomness, set in various ways
!!
!! Contact vector list
!!
!! MC parameters
!!
!! For error checking, we can put some things in explicitely
!!
NUMZMATS 2
NUMLOCS 4
!!
!! Contact Vector Production
!!
NEWCONTACTS CMA_contacts_initial
VMIN 1.0
VMAX 7.0
CONTATOMS ZMAT 1 2 3 4 5 6 7 8 9 10 11 12 13 14 15 16 17 18 19 20 21 22 23 24 25 26 27 28
CONTATOMS ZMAT 2 2 3 4 5 6 7 8 9 10 11 12 13 14 15 16 17 18 19 20 21 22 23 24 25 26 27 28
