# Supplementary material for: A Process for Modelling Diffuse Scattering from Disordered Molecular Crystals, Illustrated by Application to Monoclinic 9-Chloro-10-methylanthracene
Source: Hindawi journal article supplement (doi:10.1155/2015/878463), 2015-01-01
Supplement: f2 [file 878463.f2.zip › 878463.f2/CMA_simulations/Gen_contacts.screen_output]

 ----------------------------------------------------------------------------
 This is ZMC version dated March 20 2014, a program for implementing 
 Monte Carlo simulations of crystal structures, primarily for the
 analysis of diffuse scattering.
  
 All use should reference the paper:
 D. J. Goossens, A. P. Heerdegen, E. J. Chan & T. R. Welberry, 'Monte
 Carlo Modelling of Diffuse Scattering from Single Crystals: The 
 Program ZMC' Metallurgical and Materials Transactions A, vol 42A, 
 (2011) 23-31.  DOI:10.1007/s11661-010-0199-1
 
 ZMC is licenced under the Academic Free License version 3.0; details
 in the files DISCLAIMER.txt and COPYRIGHT.txt and at
 http://opensource.org/licenses/AFL-3.0
  
 Invoke it with ZMC --help for some help, and ZMC --help2 for more help.
 ----------------------------------------------------------------------------
 Input file is Gen_contacts.inp
 ----------------------------------------------------------------------------
 Keyword filename will be used as root name for output files.
 Output files have root name Gen_contacts.
 ----------------------------------------------------------------------------
 Cell parameters are:   8.1970  9.8840 13.5800 90.0000 95.3300 90.0000
 ----------------------------------------------------------------------------
 Value for NUMLOCS specified explicitly is:  4
 ----------------------------------------------------------------------------
 Value for NUMZMATS specified explicitly is:  2
 ----------------------------------------------------------------------------
 Number of z-matrix files to read:     2
 Reading z-matrix   1 of   2 from :                    with_CH3_1.zmat
 - - - - - - - - - - - - - - - - - - - - - - - - - - - - - - - - - - - - - - 
QQQFDY02 : Generated from the CSD
    28
Cl0       0   0.00000    0     0.00000    0     0.00000
C9        1   1.40037    0     0.00000    0     0.00000
C11       2   1.40569    1    60.97386    0     0.00000
C1        3   1.41991    2   122.20083    1  -179.84652
C2        4   1.37029    3   120.82937    2   179.31501
C3        5   1.40029    4   120.20069    3     0.78418
C4        6   1.36325    5   120.75193    4    -0.40823
C12       7   1.42460    6   121.33800    5    -0.14821
C10       8   1.40437    7   122.00699    3  -179.94295
C13       9   1.40869    8   120.19234    1    -0.20707
C5       10   1.43836    9   122.22645    1   179.98645
C6       11   1.36042   10   120.97296    9   179.95131
C7       12   1.40029   11   120.90451   10    -0.27114
C8       13   1.35585   12   120.68237   11     0.44755
C14      14   1.42150   13   120.65287   12    -0.23452
H5       11   1.08054   12   119.55974   10   179.96344
H6       12   1.08068   13   119.51638   11  -179.90512
H7       13   1.08000   14   119.67438   12   179.90673
H8       14   1.08054   15   119.71427   13  -179.86097
C15       9   1.63438   10   119.53371    8  -179.47001
Cl1       2   1.71215   15   118.78181    3  -179.89942
H1        4   1.08051    5   119.61933    3  -179.92240
H2        5   1.07977    6   119.92517    4   179.87744
H3        6   1.07979    7   119.63744    5  -179.91746
H4        7   1.08029    8   119.32972    6   179.99531
H151     20   1.02597    9   113.20119   10     0.13789
H152     20   1.04548   26   107.89725    9  -122.49241
H153     20   1.04878   27   105.00902   26   121.79440
 ----------------------------------------------------------------------------
 Reading z-matrix   2 of   2 from :                    with_CH3_2.zmat
 - - - - - - - - - - - - - - - - - - - - - - - - - - - - - - - - - - - - - - 
QQQFDY02 : Generated from the CSD
    28
Cl0       0   0.00000    0     0.00000    0     0.00000
C9        1   1.40037    0     0.00000    0     0.00000
C11       2   1.40569    1    60.97386    0     0.00000
C1        3   1.41991    2   122.20083    1  -179.84652
C2        4   1.37029    3   120.82937    2   179.31501
C3        5   1.40029    4   120.20069    3     0.78418
C4        6   1.36325    5   120.75193    4    -0.40823
C12       7   1.42460    6   121.33800    5    -0.14821
C10       8   1.40437    7   122.00699    3  -179.94295
C13       9   1.40869    8   120.19234    1    -0.20707
C5       10   1.43836    9   122.22645    1   179.98645
C6       11   1.36042   10   120.97296    9   179.95131
C7       12   1.40029   11   120.90451   10    -0.27114
C8       13   1.35585   12   120.68237   11     0.44755
C14      14   1.42150   13   120.65287   12    -0.23452
H5       11   1.08054   12   119.55974   10   179.96344
H6       12   1.08068   13   119.51638   11  -179.90512
H7       13   1.08000   14   119.67438   12   179.90673
H8       14   1.08054   15   119.71427   13  -179.86097
Cl1b      9   1.71220   10   119.99877    8   179.42031
C15b      2   1.63438   15   119.24524    3  -178.79356
H1        4   1.08051    5   119.61933    3  -179.92240
H2        5   1.07977    6   119.92517    4   179.87744
H3        6   1.07979    7   119.63744    5  -179.91746
H4        7   1.08029    8   119.32972    6   179.99531
H161     21   1.03126    2   110.33647   15   146.07350
H162     21   0.86939   26   120.31239    2  -128.90560
H163     21   0.94677   27   109.48058   26   105.66212
 ----------------------------------------------------------------------------
 Interrogation of qxyz files suggests there are    4 locations in unit cell.
 Interrogation of qxyz files suggests there are
 up to    1 instances of a z-matrix on a location.
 ----------------------------------------------------------------------------
 Quaternions and translations for z-matrix    1
 are in file with_CH3_1.qxyz
 
                     Location):    1
  Sub structure (per location):    1
                    Quaternion:   -0.387038   0.799082  -0.001707   0.460072
                      Improper:    F
               COM Translation:    6.800000   3.719200  12.020401
 
                     Location):    2
  Sub structure (per location):    1
                    Quaternion:   -0.001708  -0.460072   0.387037   0.799083
                      Improper:    F
               COM Translation:   -0.495211   8.661199   8.261516
 
                     Location):    3
  Sub structure (per location):    1
                    Quaternion:   -0.387037   0.799082  -0.001707   0.460072
                      Improper:    T
               COM Translation:    0.135529   6.164800   1.500883
 
                     Location):    4
  Sub structure (per location):    1
                    Quaternion:   -0.001705  -0.460074   0.387038   0.799081
                      Improper:    T
               COM Translation:    7.430737   1.222800   5.259765
 ----------------------------------------------------------------------------
 Quaternions and translations for z-matrix    2
 are in file with_CH3_2.qxyz
 
                     Location):    1
  Sub structure (per location):    1
                    Quaternion:   -0.387038   0.799082  -0.001707   0.460072
                      Improper:    F
               COM Translation:    6.799999   3.719200  12.020401
 
                     Location):    2
  Sub structure (per location):    1
                    Quaternion:   -0.001707  -0.460072   0.387037   0.799083
                      Improper:    F
               COM Translation:   -0.495207   8.661201   8.261510
 
                     Location):    3
  Sub structure (per location):    1
                    Quaternion:   -0.387039   0.799081  -0.001706   0.460073
                      Improper:    T
               COM Translation:    0.135529   6.164800   1.500873
 
                     Location):    4
  Sub structure (per location):    1
                    Quaternion:   -0.001707  -0.460074   0.387037   0.799082
                      Improper:    T
               COM Translation:    7.430727   1.222799   5.259767
 ----------------------------------------------------------------------------
 Location    1 can have    2 type(s) of z-matrix(ices).
 These are types 1 2
 Type    1 is in    1 orientation(s) on that location.
 These are orientation(s):    1
 Type    2 is in    1 orientation(s) on that location.
 These are orientation(s):    1
 Location    2 can have    2 type(s) of z-matrix(ices).
 These are types 1 2
 Type    1 is in    1 orientation(s) on that location.
 These are orientation(s):    1
 Type    2 is in    1 orientation(s) on that location.
 These are orientation(s):    1
 Location    3 can have    2 type(s) of z-matrix(ices).
 These are types 1 2
 Type    1 is in    1 orientation(s) on that location.
 These are orientation(s):    1
 Type    2 is in    1 orientation(s) on that location.
 These are orientation(s):    1
 Location    4 can have    2 type(s) of z-matrix(ices).
 These are types 1 2
 Type    1 is in    1 orientation(s) on that location.
 These are orientation(s):    1
 Type    2 is in    1 orientation(s) on that location.
 These are orientation(s):    1
 ----------------------------------------------------------------------------
 Value for VMIN specified explicitly is:  1.
 ----------------------------------------------------------------------------
 Value for VMAX specified explicitly is:  7.
 ----------------------------------------------------------------------------
 Coordinates for location:     1
 Occupied by zmatrix     :     1
 Which is ordinal number :     1 on that location.
 In orientation number   :     1 for that location.
    1   6.800  3.719 12.020
    2   7.832  4.583 11.632
    3   8.038  3.721 12.723
    4   9.258  3.699 13.450
    5   9.424  2.857 14.518
    6   8.392  1.991 14.899
    7   7.208  1.977 14.223
    8   6.979  2.840 13.113
    9   5.762  2.843 12.411
   10   5.573  3.718 11.324
   11   4.345  3.761 10.578
   12   4.190  4.618  9.533
   13   5.221  5.488  9.157
   14   6.402  5.489  9.822
   15   6.617  4.610 10.918
   16   3.533  3.103 10.852
   17   3.259  4.627  8.984
   18   5.072  6.166  8.329
   19   7.188  6.163  9.514
   20   4.560  1.822 12.841
   21   9.092  5.638 11.154
   22  10.066  4.353 13.155
   23  10.353  2.862 15.068
   24   8.535  1.325 15.737
   25   6.428  1.298 14.535
   26   3.726  1.908 12.250
   27   4.889  0.830 12.791
   28   4.379  1.997 13.859
 ----------------------------------------------------
 Coordinates for location:     1
 Occupied by zmatrix     :     2
 Which is ordinal number :     2 on that location.
 In orientation number   :     1 for that location.
    1   6.800  3.719 12.020
    2   7.832  4.583 11.632
    3   8.038  3.721 12.723
    4   9.258  3.699 13.450
    5   9.424  2.857 14.518
    6   8.392  1.991 14.899
    7   7.208  1.977 14.223
    8   6.979  2.840 13.113
    9   5.762  2.843 12.411
   10   5.573  3.718 11.324
   11   4.345  3.761 10.578
   12   4.190  4.618  9.533
   13   5.221  5.488  9.157
   14   6.402  5.489  9.822
   15   6.617  4.610 10.918
   16   3.533  3.103 10.852
   17   3.259  4.627  8.984
   18   5.072  6.166  8.329
   19   7.188  6.163  9.514
   20   4.501  1.788 12.890
   21   9.033  5.604 11.202
   22  10.066  4.353 13.155
   23  10.353  2.862 15.068
   24   8.535  1.325 15.737
   25   6.428  1.298 14.535
   26   9.566  5.901 12.034
   27   9.446  5.288 10.506
   28   8.735  6.484 11.020
 ----------------------------------------------------
 Coordinates for location:     2
 Occupied by zmatrix     :     1
 Which is ordinal number :     1 on that location.
 In orientation number   :     1 for that location.
    1  -0.495  8.661  8.262
    2  -1.527  9.525  8.650
    3  -1.733  8.663  7.558
    4  -2.953  8.641  6.832
    5  -3.119  7.798  5.764
    6  -2.087  6.933  5.383
    7  -0.903  6.919  6.059
    8  -0.674  7.782  7.169
    9   0.543  7.785  7.871
   10   0.731  8.660  8.958
   11   1.960  8.703  9.704
   12   2.115  9.560 10.749
   13   1.084 10.430 11.125
   14  -0.097 10.431 10.460
   15  -0.312  9.552  9.364
   16   2.772  8.045  9.430
   17   3.046  9.569 11.298
   18   1.232 11.108 11.953
   19  -0.883 11.105 10.768
   20   1.744  6.764  7.441
   21  -2.788 10.580  9.128
   22  -3.761  9.295  7.127
   23  -4.048  7.804  5.214
   24  -2.231  6.267  4.545
   25  -0.123  6.240  5.747
   26   2.579  6.850  8.032
   27   1.416  5.772  7.491
   28   1.925  6.939  6.423
 ----------------------------------------------------
 Coordinates for location:     2
 Occupied by zmatrix     :     2
 Which is ordinal number :     2 on that location.
 In orientation number   :     1 for that location.
    1  -0.495  8.661  8.262
    2  -1.527  9.525  8.650
    3  -1.733  8.663  7.558
    4  -2.953  8.641  6.832
    5  -3.119  7.799  5.764
    6  -2.087  6.933  5.383
    7  -0.903  6.919  6.059
    8  -0.674  7.782  7.169
    9   0.543  7.785  7.871
   10   0.731  8.660  8.958
   11   1.960  8.703  9.704
   12   2.115  9.560 10.749
   13   1.084 10.430 11.125
   14  -0.097 10.431 10.460
   15  -0.312  9.552  9.364
   16   2.772  8.045  9.430
   17   3.046  9.569 11.298
   18   1.232 11.108 11.953
   19  -0.883 11.105 10.768
   20   1.804  6.730  7.392
   21  -2.728 10.546  9.080
   22  -3.761  9.295  7.127
   23  -4.048  7.804  5.214
   24  -2.231  6.267  4.545
   25  -0.123  6.240  5.747
   26  -3.261 10.843  8.248
   27  -3.142 10.230  9.776
   28  -2.430 11.426  9.262
 ----------------------------------------------------
 Coordinates for location:     3
 Occupied by zmatrix     :     1
 Which is ordinal number :     1 on that location.
 In orientation number   :     1 for that location.
    1   0.136  6.165  1.501
    2  -0.896  5.301  1.889
    3  -1.102  6.163  0.798
    4  -2.322  6.185  0.072
    5  -2.488  7.027 -0.997
    6  -1.456  7.893 -1.378
    7  -0.272  7.907 -0.702
    8  -0.043  7.044  0.408
    9   1.174  7.041  1.110
   10   1.362  6.166  2.197
   11   2.591  6.123  2.944
   12   2.746  5.266  3.989
   13   1.715  4.396  4.365
   14   0.534  4.395  3.699
   15   0.319  5.274  2.603
   16   3.403  6.781  2.669
   17   3.677  5.257  4.538
   18   1.863  3.718  5.192
   19  -0.253  3.721  4.008
   20   2.375  8.062  0.680
   21  -2.157  4.246  2.368
   22  -3.130  5.531  0.366
   23  -3.417  7.022 -1.547
   24  -1.600  8.559 -2.216
   25   0.508  8.586 -1.014
   26   3.209  7.976  1.271
   27   2.047  9.054  0.730
   28   2.556  7.887 -0.338
 ----------------------------------------------------
 Coordinates for location:     3
 Occupied by zmatrix     :     2
 Which is ordinal number :     2 on that location.
 In orientation number   :     1 for that location.
    1   0.136  6.165  1.501
    2  -0.896  5.301  1.889
    3  -1.102  6.163  0.798
    4  -2.322  6.185  0.072
    5  -2.488  7.027 -0.997
    6  -1.456  7.893 -1.378
    7  -0.272  7.907 -0.702
    8  -0.043  7.044  0.408
    9   1.174  7.041  1.110
   10   1.362  6.166  2.197
   11   2.591  6.123  2.944
   12   2.746  5.266  3.989
   13   1.715  4.396  4.365
   14   0.534  4.395  3.699
   15   0.319  5.274  2.603
   16   3.403  6.781  2.669
   17   3.677  5.257  4.538
   18   1.863  3.718  5.192
   19  -0.253  3.721  4.008
   20   2.435  8.096  0.631
   21  -2.098  4.280  2.319
   22  -3.130  5.531  0.366
   23  -3.417  7.022 -1.547
   24  -1.600  8.559 -2.216
   25   0.508  8.586 -1.014
   26  -2.631  3.983  1.487
   27  -2.511  4.596  3.015
   28  -1.799  3.400  2.501
 ----------------------------------------------------
 Coordinates for location:     4
 Occupied by zmatrix     :     1
 Which is ordinal number :     1 on that location.
 In orientation number   :     1 for that location.
    1   7.431  1.223  5.260
    2   8.462  0.359  4.872
    3   8.669  1.221  5.963
    4   9.889  1.243  6.689
    5  10.055  2.085  7.757
    6   9.022  2.951  8.138
    7   7.839  2.965  7.462
    8   7.609  2.102  6.352
    9   6.393  2.099  5.651
   10   6.204  1.224  4.563
   11   4.975  1.181  3.817
   12   4.820  0.324  2.772
   13   5.851 -0.546  2.396
   14   7.033 -0.547  3.061
   15   7.248  0.332  4.158
   16   4.164  1.839  4.092
   17   3.889  0.315  2.223
   18   5.703 -1.224  1.568
   19   7.819 -1.221  2.753
   20   5.191  3.120  6.081
   21   9.723 -0.696  4.393
   22  10.696  0.589  6.394
   23  10.984  2.080  8.307
   24   9.166  3.617  8.977
   25   7.059  3.644  7.775
   26   4.357  3.034  5.490
   27   5.520  4.112  6.030
   28   5.010  2.945  7.099
 ----------------------------------------------------
 Coordinates for location:     4
 Occupied by zmatrix     :     2
 Which is ordinal number :     2 on that location.
 In orientation number   :     1 for that location.
    1   7.431  1.223  5.260
    2   8.462  0.359  4.872
    3   8.669  1.221  5.963
    4   9.889  1.243  6.689
    5  10.055  2.085  7.757
    6   9.022  2.951  8.138
    7   7.839  2.965  7.462
    8   7.609  2.102  6.352
    9   6.393  2.099  5.651
   10   6.204  1.224  4.563
   11   4.975  1.181  3.817
   12   4.820  0.324  2.772
   13   5.851 -0.546  2.396
   14   7.033 -0.547  3.061
   15   7.248  0.332  4.158
   16   4.164  1.839  4.092
   17   3.889  0.315  2.223
   18   5.703 -1.224  1.568
   19   7.819 -1.221  2.753
   20   5.132  3.154  6.129
   21   9.664 -0.662  4.442
   22  10.696  0.589  6.394
   23  10.984  2.080  8.307
   24   9.166  3.617  8.977
   25   7.059  3.644  7.775
   26  10.197 -0.959  5.273
   27  10.077 -0.346  3.745
   28   9.365 -1.542  4.259
 ----------------------------------------------------
 Initial Cartesian positions calculated.
 ----------------------------------------------------------------------------
 Exiting normally.
 ----------------------------------------------------------------------------
