# Supplementary material for: A Process for Modelling Diffuse Scattering from Disordered Molecular Crystals, Illustrated by Application to Monoclinic 9-Chloro-10-methylanthracene
Source: Hindawi journal article supplement (doi:10.1155/2015/878463), 2015-01-01
Supplement: f2 [file 878463.f2.zip › 878463.f2/CMA_simulations/MC_occ.inp]

CMA_occ_contacts_sorted
CMA_initial_random_occ.txt
CMA_occ_correlations_Epstein
24
-6
0.4 0.2 0.05 0.0
 1.  1.  1.   1. 
2000
