# Supplementary material for: A Process for Modelling Diffuse Scattering from Disordered Molecular Crystals, Illustrated by Application to Monoclinic 9-Chloro-10-methylanthracene
Source: Hindawi journal article supplement (doi:10.1155/2015/878463), 2015-01-01
Supplement: f2 [file 878463.f2.zip › 878463.f2/CMA_simulations/Model_1.inp]

HEADER CMA monclinic no occ correlations
!!
!! Crystal geometry information
!!
CRYSTAL 32 32 32
OCCFILE CMA_initial_random_occ.txt
ZMATFILE  1 with_CH3_1.zmat
QXYZFILE  1 with_CH3_1.qxyz
ZMATFILE  2 with_CH3_2.zmat
QXYZFILE  2 with_CH3_2.qxyz
CELL  8.1970    9.8840   13.5800   90.0000   95.3300   90.0000 
!!
!! Initial randomness, set in various ways (see ZMC --help2)
!!
XYZINITW 0.1
!!XYZINITW Y 0.2
!!XYZINITW 1 Z  0.1234
QINITW 0.01
!!QINITW Q1 0.01
!!QINITW 1 Q2 0.02
!!ININITW 5.73
!!
!! Contact vector list
!!
CONTACTFILE CMA_contacts_grouped_trimmed
!!
!! MC parameters
!!
TEMPERATURE 5.0
MCCYCLES 5000
XYZWIDTH 0.1
QWIDTH 0.01
!! Set all force constants to zero
SPRCON 0.0
!! Now just set non-zero ones as determined by eric_trim to their values:
!! in other words, paste CMA_force_const_Chan into here:
 SPRCON    3.52888203               2
 SPRCON    3.52888203               3
 SPRCON    3.52888203               4
 SPRCON    3.46541691               6
 SPRCON    3.46541691               7
 SPRCON    3.07771301               9
 SPRCON    3.07771301              10
 SPRCON    3.07771301              11
 SPRCON    3.07771301              12
 SPRCON    2.89272690              14
 SPRCON    2.89272690              15
 SPRCON    2.89229202              16
 SPRCON    2.55812073              17
 SPRCON    2.55812073              18
 SPRCON    2.55812073              19
 SPRCON    2.55812073              20
 SPRCON    2.51849747              21
 SPRCON    2.51849747              22
 SPRCON    2.51849747              23
 SPRCON    2.14291477              25
 SPRCON    2.12872314              26
 SPRCON    2.12872314              27
 SPRCON    2.12872314              28
 SPRCON    2.01831913              29
 SPRCON    2.01831913              30
 SPRCON    2.01831913              31
 SPRCON    1.92895603              33
 SPRCON    1.92895603              34
 SPRCON    1.92895603              35
 SPRCON    1.84511471              37
 SPRCON    1.84511471              38
 SPRCON    1.84511471              39
 SPRCON    1.84511471              40
 SPRCON    1.80424309              42
 SPRCON    1.80424309              43
 SPRCON    3.53349400              45
 SPRCON    3.53349400              46
 SPRCON    3.53349400              47
 SPRCON    3.53349400              48
 SPRCON    3.30059338              49
 SPRCON    3.30059338              50
 SPRCON    3.30059338              51
 SPRCON    3.30059338              52
 SPRCON    1.21594620              53
 SPRCON    1.21594620              54
 SPRCON    1.21594620              55
 SPRCON    1.21594620              56
 SPRCON    3.13769436              57
 SPRCON    3.13769436              58
 SPRCON    3.13769436              59
 SPRCON    3.13769436              60
 SPRCON    1.07547092              62
 SPRCON    1.07547092              63
 SPRCON    1.07547092              64
 SPRCON    3.01100540              65
 SPRCON    3.01100540              66
 SPRCON    3.01100540              67
 SPRCON    3.01100540              68
 SPRCON    2.79426861              69
 SPRCON    2.79426861              70
 SPRCON    2.79426861              71
 SPRCON    2.79426861              72
 SPRCON    2.76494884              73
 SPRCON    2.76494884              74
 SPRCON    2.76494884              75
 SPRCON    2.73356056              77
 SPRCON    2.73356056              78
 SPRCON    2.73356056              79
 SPRCON    2.73356056              80
 SPRCON    2.90580559              81
 SPRCON    2.90580559              82
 SPRCON    2.90580559              83
 SPRCON    2.62420940              86
 SPRCON    2.62420940              87
 SPRCON    2.62420940              88
 SPRCON    2.55009937              90
 SPRCON    2.55009937              91
 SPRCON    2.55009937              92
 SPRCON    2.73012638              94
 SPRCON    2.73012638              95
 SPRCON    2.73012638              96
 SPRCON    2.39801884              97
 SPRCON    2.39801884              98
 SPRCON    2.39801884              99
 SPRCON    2.39801884             100
 SPRCON    2.54334927             101
 SPRCON   0.453118324             102
 SPRCON   0.453118324             103
 SPRCON    2.53786850             104
 SPRCON    2.29785252             105
 SPRCON    2.29785252             106
 SPRCON    2.29785252             107
 SPRCON   0.436903000             108
 SPRCON   0.402215004             109
 SPRCON   0.402215004             110
 SPRCON   0.402215004             111
 SPRCON    2.26495075             112
 SPRCON    2.45557499             113
 SPRCON    2.45557499             114
 SPRCON    2.45557499             115
 SPRCON   0.368673325             118
 SPRCON   0.368673325             119
 SPRCON   0.368673325             120
 SPRCON    2.17623711             121
 SPRCON    2.17623711             122
 SPRCON    2.17623711             123
 SPRCON    2.17623711             124
 SPRCON   0.300330162             125
 SPRCON   0.300330162             126
 SPRCON   0.300330162             127
 SPRCON   0.300330162             128
 SPRCON   0.264219284             129
 SPRCON   0.264219284             130
 SPRCON   0.264219284             131
 SPRCON    2.05163479             133
 SPRCON    2.03195286             134
 SPRCON    2.03195286             135
 SPRCON    2.03155231             136
 SPRCON    2.01311111             137
 SPRCON    2.01311111             138
 SPRCON    2.01311111             139
 SPRCON    1.95162010             141
 SPRCON    1.95162010             142
 SPRCON    1.95162010             143
 SPRCON    1.95162010             144
 SPRCON    1.92657280             145
 SPRCON    1.92657280             146
 SPRCON    1.92657280             147
 SPRCON    1.92657280             148
 SPRCON    9.18331146E-02         149
 SPRCON    1.87864399             150
 SPRCON    1.87864399             151
 SPRCON    1.87864399             152
 SPRCON    1.84235859             153
 SPRCON    5.34067154E-02         154
 SPRCON    5.34067154E-02         155
 SPRCON    5.34067154E-02         156
 SPRCON    4.60023880E-02         157
 SPRCON    4.56800461E-02         158
 SPRCON    4.56800461E-02         159
 SPRCON    1.79836369             162
 SPRCON    1.79836369             163
 SPRCON    1.79836369             164
 SPRCON    1.65441418             177
 SPRCON    1.65441418             178
 SPRCON    1.65441418             179
 SPRCON    1.65441418             180
 SPRCON    1.45832539             189
 SPRCON    1.45832539             190
 SPRCON    1.45832539             191
 SPRCON    1.30558968             193
 SPRCON    1.30558968             194
 SPRCON    1.30558968             195
 SPRCON    1.30558968             196
 SPRCON    1.29480171             197
 SPRCON    1.29480171             198
 SPRCON    1.29480171             199
 SPRCON    1.26547623             201
 SPRCON    1.26547623             202
 SPRCON    1.26547623             203
 SPRCON    1.26547623             204
 SPRCON    1.16998196             209
 SPRCON    1.16998196             210
 SPRCON    1.16998196             211
 SPRCON    1.16998196             212
 SPRCON    1.27585983             218
 SPRCON    1.27585983             219
 SPRCON    1.27585983             220
 SPRCON   0.941785812             225
 SPRCON   0.941785812             226
 SPRCON   0.941785812             227
 SPRCON   0.941785812             228
 SPRCON   0.903595924             229
 SPRCON   0.903595924             230
 SPRCON   0.903595924             231
 SPRCON   0.907158852             232
 SPRCON   0.867698669             233
 SPRCON   0.867698669             234
 SPRCON   0.867698669             235
 SPRCON    2.70697403             245
 SPRCON   0.766129494             246
 SPRCON   0.766129494             247
 SPRCON   0.766129494             248
 SPRCON   0.752815247             250
 SPRCON   0.752815247             251
 SPRCON   0.912504196             252
 SPRCON    2.62590885             257
 SPRCON   0.690367699             258
 SPRCON   0.690367699             259
 SPRCON   0.690715790             260
 SPRCON   0.666762352             261
 SPRCON   0.666762352             262
 SPRCON   0.666762352             263
 SPRCON    2.58941841             264
 SPRCON   0.643566132             265
 SPRCON   0.643566132             266
 SPRCON   0.643566132             267
 SPRCON   0.643566132             268
 SPRCON   0.633891106             269
 SPRCON   0.633891106             270
 SPRCON   0.633891106             271
 SPRCON   0.617674828             276
 SPRCON   0.522377014             281
 SPRCON   0.522036552             282
 SPRCON   0.522036552             283
 SPRCON   0.522036552             284
 SPRCON   0.478853226             285
 SPRCON   0.478853226             286
 SPRCON   0.478853226             287
 SPRCON   0.478853226             288
 SPRCON    2.55263138             289
 SPRCON    2.55263138             290
 SPRCON    2.55263138             291
 SPRCON   0.405911446             293
 SPRCON   0.405911446             294
 SPRCON   0.405911446             295
 SPRCON   0.405911446             296
 SPRCON   0.373695374             297
 SPRCON   0.366664886             298
 SPRCON   0.366664886             299
 SPRCON   0.366664886             300
 SPRCON   0.357968330             301
 SPRCON   0.351617813             302
 SPRCON   0.351617813             303
 SPRCON   0.351617813             304
 SPRCON   0.509092331             306
 SPRCON   0.509092331             307
 SPRCON   0.509092331             308
 SPRCON   0.319942474             310
 SPRCON   0.319942474             311
 SPRCON   0.302654266             313
 SPRCON   0.302654266             314
 SPRCON   0.302654266             315
 SPRCON   0.302654266             316
 SPRCON   0.262897491             318
 SPRCON   0.262897491             319
 SPRCON   0.262897491             320
 SPRCON    2.05766773             321
 SPRCON    2.05766773             322
 SPRCON    2.05766773             323
 SPRCON    2.05766773             324
 SPRCON   0.198369026             325
 SPRCON   0.198369026             326
 SPRCON   0.198369026             327
 SPRCON   0.198369026             328
 SPRCON   0.174465179             329
 SPRCON   0.174465179             330
 SPRCON   0.174465179             331
 SPRCON   0.174465179             332
 SPRCON   0.174465179             333
 SPRCON    1.92895603             337
 SPRCON    1.92895603             338
 SPRCON    1.92895603             339
 SPRCON    1.92895603             340
 SPRCON   0.105439186             341
 SPRCON   0.105439186             342
 SPRCON   0.105439186             343
 SPRCON   0.105439186             344
 SPRCON    1.86008930             345
 SPRCON    1.86008930             346
 SPRCON    1.86008930             347
 SPRCON    1.86008930             348
 SPRCON    1.82858849             349
 SPRCON    1.82858849             350
 SPRCON    1.82858849             351
 SPRCON    1.82858849             352
 SPRCON    1.81680107             353
 SPRCON   0.198698044             354
 SPRCON   0.198698044             355
 SPRCON   0.198698044             356
 SPRCON    1.77213860             357
 SPRCON    1.77213860             358
 SPRCON    1.77213860             359
 SPRCON    1.77213860             360
 SPRCON    1.74754333             361
 SPRCON    1.74754333             362
 SPRCON    1.74754333             363
 SPRCON    1.74754333             364
 SPRCON    1.88022518             373
 SPRCON    1.65132523             377
 SPRCON    1.65132523             378
 SPRCON    1.65132523             379
 SPRCON    1.65132523             380
 SPRCON    1.59551048             385
 SPRCON    1.59551048             386
 SPRCON    1.59551048             387
 SPRCON    1.59551048             388
 SPRCON    1.54688835             396
 SPRCON    1.43602943             409
 SPRCON    1.43602943             410
 SPRCON    1.43602943             411
 SPRCON    1.43640709             412
 SPRCON    1.39873695             418
 SPRCON    1.39873695             419
 SPRCON    1.39873695             420
 SPRCON    1.34961605             425
 SPRCON    1.32235527             429
 SPRCON    1.32235527             430
 SPRCON    1.32235527             431
 SPRCON    1.32235527             432
 SPRCON    1.30000782             433
 SPRCON    1.47347069             434
 SPRCON    1.47347069             435
 SPRCON    1.47347069             436
 SPRCON    1.26214218             437
 SPRCON    1.25769711             438
 SPRCON    1.25769711             439
 SPRCON    1.25769711             440
 SPRCON    1.14909840             453
 SPRCON    1.14909840             454
 SPRCON    1.14909840             455
 SPRCON    1.14946365             456
 SPRCON    1.10638046             457
 SPRCON    1.10638046             458
 SPRCON    1.10638046             459
 SPRCON    1.27289200             461
 SPRCON    1.27289200             462
 SPRCON    1.27289200             463
 SPRCON    1.27474689             464
 SPRCON    1.07111645             465
 SPRCON    1.07111645             466
 SPRCON    1.07111645             467
 SPRCON    1.07111645             468
 SPRCON   0.944289207             489
 SPRCON   0.944289207             490
 SPRCON   0.944289207             491
 SPRCON   0.944289207             492
 SPRCON    1.04792309             497
 SPRCON    1.04792309             498
 SPRCON    1.04792309             499
 SPRCON   0.928204536             513
 SPRCON   0.938924789             514
 SPRCON   0.938924789             515
 SPRCON   0.917853355             520
 SPRCON   0.711598396             521
 SPRCON   0.677515984             528
 SPRCON   0.636309624             529
 SPRCON   0.636309624             530
 SPRCON   0.636309624             531
 SPRCON   0.636309624             532
 SPRCON   0.615262032             533
 SPRCON   0.611127853             534
 SPRCON   0.611127853             535
 SPRCON   0.611127853             536
 SPRCON   0.591859818             537
 SPRCON   0.931062698             538
 SPRCON   0.931062698             539
 SPRCON   0.591859818             540
 SPRCON   0.691062927             549
 SPRCON   0.683765411             550
 SPRCON   0.683765411             551
 SPRCON   0.683765411             552
 SPRCON   0.376375198             565
 SPRCON   0.376375198             566
 SPRCON   0.376375198             567
 SPRCON   0.337932587             569
 SPRCON   0.337932587             570
 SPRCON   0.337932587             571
 SPRCON   0.337932587             572
 SPRCON   0.311627388             578
 SPRCON   0.311627388             579
 SPRCON   0.311627388             580
 SPRCON   0.289381981             581
 SPRCON   0.289381981             582
 SPRCON   0.289381981             583
 SPRCON   0.289381981             584
 SPRCON   0.258271217             585
 SPRCON   0.258271217             586
 SPRCON   0.258271217             587
 SPRCON   0.258271217             588
 SPRCON   0.389787674             589
 SPRCON   0.389787674             590
 SPRCON   0.389787674             591
 SPRCON   0.229582787             592
 SPRCON   0.161396027             601
 SPRCON   0.161396027             602
 SPRCON   0.161396027             603
 SPRCON   0.161396027             604
INCUPDATE 2
BADJUST   2  2.0
!!
!! For error checking, we can put some things in explicitely
!!
NUMZMATS 2
NUMLOCS 4
!!
