# Supplementary material for: A Process for Modelling Diffuse Scattering from Disordered Molecular Crystals, Illustrated by Application to Monoclinic 9-Chloro-10-methylanthracene
Source: Hindawi journal article supplement (doi:10.1155/2015/878463), 2015-01-01
Supplement: f2 [file 878463.f2.zip › 878463.f2/CMA_simulations/Model_1.sh]

ZMC --diffuse Model_1.inp
DZMC Model_1.diffuse < Model_1_in0kl
DZMC Model_1.diffuse < Model_1_inh0l
DZMC Model_1.diffuse < Model_1_inhk0
