# Supplementary material for: A Process for Modelling Diffuse Scattering from Disordered Molecular Crystals, Illustrated by Application to Monoclinic 9-Chloro-10-methylanthracene
Source: Hindawi journal article supplement (doi:10.1155/2015/878463), 2015-01-01
Supplement: f2 [file 878463.f2.zip › 878463.f2/CMA_simulations/Model_2.sh]

ZMC --diffuse Model_2.inp
DZMC Model_2.diffuse < Model_2_in0kl
DZMC Model_2.diffuse < Model_2_inh0l
DZMC Model_2.diffuse < Model_2_inhk0
