# Supplementary material for: A Process for Modelling Diffuse Scattering from Disordered Molecular Crystals, Illustrated by Application to Monoclinic 9-Chloro-10-methylanthracene
Source: Hindawi journal article supplement (doi:10.1155/2015/878463), 2015-01-01
Supplement: f2 [file 878463.f2.zip › 878463.f2/CMA_simulations/with_CH3_1.cif]

###########################################################################
#
#                 Cambridge Crystallographic Data Centre
#                                CCDC 
# 
###########################################################################
#
#  This CIF contains data generated directly from one or more entries in
#  the Cambridge Structural Database and will include bibliographic, 
#  chemical, crystal, experimental, refinement, and atomic coordinate data,
#  as available.
#     
#  Copyright  2007  The Cambridge Crystallographic Data Centre
# 
#  This CIF is provided on the understanding that it is used for bona fide 
#  research purposes only.  It may contain copyright material of the CCDC
#  or of third parties, and may not be copied or further disseminated in 
#  any form, whether machine-readable or not, except for the purpose of 
#  generating routine backup copies on your local computer system.
# 
#  For further information about the CCDC, data deposition and data 
#  retrieval see <www.ccdc.cam.ac.uk>. Bona fide researchers may freely 
#  download  Mercury and enCIFer from this site to visualise CIF-encoded 
#  structures and to carry out CIF format checking respectively.
#
###########################################################################

data_CSD_CIF_QQQFDY02
_audit_creation_date 1981-11-16
_audit_creation_method CSD-ConQuest-V1
_database_code_CSD QQQFDY02
_chemical_formula_sum 'C15 H11 Cl1'
_chemical_formula_moiety
;
C15 H11 Cl1
;
_journal_coeditor_code "IUCr A20108"
_journal_coden_Cambridge 107
_journal_volume 37
_journal_year 1981
_journal_page_first 1125
_journal_name_full 'Acta Crystallogr.,Sect.B:Struct.Crystallogr.Cryst.Chem. '
loop_
_publ_author_name
"R.D.G.Jones"
"T.R.Welberry"
_chemical_name_systematic
;
9-Chloro-10-methylanthracene
;
_cell_volume   1095.483
_exptl_crystal_colour 'yellow'
_exptl_crystal_density_diffrn 1.37
_exptl_special_details
;
monoclinic polymorph

;
_diffrn_ambient_temperature ?
_diffrn_special_details
;
The study was carried out at room temperature,in the range 283-303K

;
_refine_special_details
;
The structure shows disorder with respect to Cl and methyl, the occupancy 
factor for Cl at the 9 position being 0.686.
;
#These two values have been output from a single CSD field.
_refine_ls_R_factor_gt 0.057
_refine_ls_wR_factor_gt 0.057
_symmetry_cell_setting monoclinic
_symmetry_space_group_name_H-M 'P 21/c'
_symmetry_Int_Tables_number 14
loop_
_symmetry_equiv_pos_site_id
_symmetry_equiv_pos_as_xyz
1 x,y,z
2 -x,1/2+y,1/2-z
3 -x,-y,-z
4 x,-1/2-y,-1/2+z
_cell_length_a 8.197(2)
_cell_length_b 9.884(4)
_cell_length_c 13.580(8)
_cell_angle_alpha 90
_cell_angle_beta 95.33(3)
_cell_angle_gamma 90
_cell_formula_units_Z 4
loop_
_atom_type_symbol
_atom_type_radius_bond
C 0.68
H 0.23
Cl 0.99
loop_
_atom_site_label
_atom_site_type_symbol
_atom_site_fract_x
_atom_site_fract_y
_atom_site_fract_z
Cl0  Cl -0.0336166667	0.3762833333	0.889
C9 C 0.08780 0.46370 0.86030
C11 C 0.12540 0.37650 0.94100
C1 C 0.28250 0.37420 0.99470
C2 C 0.31490 0.28900 1.07370
C3 C 0.19330 0.20140 1.10190
C4 C 0.04120 0.20000 1.05190
C12 C 0.00060 0.28730 0.96980
C10 C -0.15580 0.28760 0.91790
C13 C -0.19120 0.37620 0.83750
C5 C -0.34960 0.38050 0.78230
C6 C -0.38040 0.46720 0.70500
C7 C -0.25890 0.55520 0.67720
C8 C -0.10720 0.55530 0.72640
C14 C -0.06850 0.46640 0.80750
H5 H -0.44550 0.31390 0.80260
H6 H -0.50020 0.46810 0.66440
H7 H -0.28640 0.62380 0.61600
H8 H -0.01480 0.62350 0.70360
C15 C -0.29750 0.18430 0.94970
Cl1 Cl 0.23620 0.57040 0.82490
H1 H 0.37770 0.44040 0.97290
H2 H 0.43450 0.28960 1.11440
H3 H 0.22040 0.13410 1.16390
H4 H -0.05040 0.13130 1.07500
H151 H -.406 .193 .906
H152 H -.258 .084 .946
H153 H -.308 .202 1.025
#END
