# Supplementary material for: A Process for Modelling Diffuse Scattering from Disordered Molecular Crystals, Illustrated by Application to Monoclinic 9-Chloro-10-methylanthracene
Source: Hindawi journal article supplement (doi:10.1155/2015/878463), 2015-01-01
Supplement: f2 [file 878463.f2.zip › 878463.f2/CMA_simulations/with_CH3_1.mol2]

@<TRIPOS>MOLECULE
QQQFDY02
   112   140     4     0     0
SMALL
NO_CHARGES
****
Generated from the CSD

@<TRIPOS>ATOM
     1 Cl0      6.8000   3.7192  12.0204   Cl        1 RES1   0.0000
     2 C9       7.8315   4.5832  11.6324   C.3       1 RES1   0.0000
     3 C11      8.0379   3.7213  12.7235   C.3       1 RES1   0.0000
     4 C1       9.2579   3.6986  13.4496   C.2       1 RES1   0.0000
     5 C2       9.4238   2.8565  14.5178   C.2       1 RES1   0.0000
     6 C3       8.3915   1.9906  14.8991   C.2       1 RES1   0.0000
     7 C4       7.2078   1.9768  14.2230   C.2       1 RES1   0.0000
     8 C12      6.9785   2.8397  13.1129   C.3       1 RES1   0.0000
     9 C10      5.7620   2.8426  12.4112   C.3       1 RES1   0.0000
    10 C13      5.5733   3.7184  11.3241   C.3       1 RES1   0.0000
    11 C5       4.3445   3.7609  10.5777   C.2       1 RES1   0.0000
    12 C6       4.1895   4.6178   9.5325   C.2       1 RES1   0.0000
    13 C7       5.2205   5.4876   9.1566   C.2       1 RES1   0.0000
    14 C8       6.4019   5.4886   9.8219   C.2       1 RES1   0.0000
    15 C14      6.6169   4.6099  10.9184   C.3       1 RES1   0.0000
    16 H5       3.5328   3.1026  10.8522   H         1 RES1   0.0000
    17 H6       3.2587   4.6267   8.9835   H         1 RES1   0.0000
    18 H7       5.0723   6.1656   8.3291   H         1 RES1   0.0000
    19 H8       7.1881   6.1627   9.5136   H         1 RES1   0.0000
    20 C15      4.5604   1.8216  12.8412   C.3       1 RES1   0.0000
    21 Cl1      9.0925   5.6378  11.1537   Cl        1 RES1   0.0000
    22 H1      10.0657   4.3529  13.1549   H         1 RES1   0.0000
    23 H2      10.3528   2.8624  15.0681   H         1 RES1   0.0000
    24 H3       8.5354   1.3254  15.7374   H         1 RES1   0.0000
    25 H4       6.4278   1.2978  14.5354   H         1 RES1   0.0000
    26 H151     3.7261   1.9076  12.2503   H         1 RES1   0.0000
    27 H152     4.8888   0.8303  12.7911   H         1 RES1   0.0000
    28 H153     4.3793   1.9966  13.8593   H         1 RES1   0.0000
    29 Cl0     -0.4952   8.6612   8.2615   Cl        2 RES2   0.0000
    30 C9      -1.5267   9.5252   8.6496   C.3       2 RES2   0.0000
    31 C11     -1.7331   8.6633   7.5584   C.3       2 RES2   0.0000
    32 C1      -2.9531   8.6406   6.8323   C.2       2 RES2   0.0000
    33 C2      -3.1190   7.7985   5.7641   C.2       2 RES2   0.0000
    34 C3      -2.0867   6.9326   5.3828   C.2       2 RES2   0.0000
    35 C4      -0.9030   6.9188   6.0589   C.2       2 RES2   0.0000
    36 C12     -0.6738   7.7817   7.1690   C.3       2 RES2   0.0000
    37 C10      0.5428   7.7846   7.8707   C.3       2 RES2   0.0000
    38 C13      0.7315   8.6604   8.9578   C.3       2 RES2   0.0000
    39 C5       1.9603   8.7029   9.7042   C.2       2 RES2   0.0000
    40 C6       2.1153   9.5598  10.7494   C.2       2 RES2   0.0000
    41 C7       1.0843  10.4296  11.1253   C.2       2 RES2   0.0000
    42 C8      -0.0972  10.4306  10.4601   C.2       2 RES2   0.0000
    43 C14     -0.3121   9.5519   9.3635   C.3       2 RES2   0.0000
    44 H5       2.7720   8.0446   9.4297   H         2 RES2   0.0000
    45 H6       3.0461   9.5687  11.2984   H         2 RES2   0.0000
    46 H7       1.2325  11.1076  11.9528   H         2 RES2   0.0000
    47 H8      -0.8833  11.1047  10.7683   H         2 RES2   0.0000
    48 C15      1.7444   6.7636   7.4408   C.3       2 RES2   0.0000
    49 Cl1     -2.7878  10.5798   9.1282   Cl        2 RES2   0.0000
    50 H1      -3.7609   9.2949   7.1271   H         2 RES2   0.0000
    51 H2      -4.0480   7.8044   5.2138   H         2 RES2   0.0000
    52 H3      -2.2306   6.2674   4.5445   H         2 RES2   0.0000
    53 H4      -0.1230   6.2398   5.7465   H         2 RES2   0.0000
    54 H151     2.5787   6.8496   8.0316   H         2 RES2   0.0000
    55 H152     1.4160   5.7723   7.4908   H         2 RES2   0.0000
    56 H153     1.9255   6.9386   6.4226   H         2 RES2   0.0000
    57 Cl0      0.1355   6.1648   1.5009   Cl        3 RES3   0.0000
    58 C9      -0.8959   5.3008   1.8889   C.3       3 RES3   0.0000
    59 C11     -1.1023   6.1627   0.7978   C.3       3 RES3   0.0000
    60 C1      -2.3223   6.1854   0.0717   C.2       3 RES3   0.0000
    61 C2      -2.4883   7.0275  -0.9965   C.2       3 RES3   0.0000
    62 C3      -1.4559   7.8934  -1.3778   C.2       3 RES3   0.0000
    63 C4      -0.2722   7.9072  -0.7018   C.2       3 RES3   0.0000
    64 C12     -0.0430   7.0443   0.4083   C.3       3 RES3   0.0000
    65 C10      1.1735   7.0414   1.1101   C.3       3 RES3   0.0000
    66 C13      1.3623   6.1656   2.1972   C.3       3 RES3   0.0000
    67 C5       2.5910   6.1231   2.9436   C.2       3 RES3   0.0000
    68 C6       2.7460   5.2662   3.9888   C.2       3 RES3   0.0000
    69 C7       1.7150   4.3964   4.3647   C.2       3 RES3   0.0000
    70 C8       0.5336   4.3954   3.6994   C.2       3 RES3   0.0000
    71 C14      0.3187   5.2741   2.6028   C.3       3 RES3   0.0000
    72 H5       3.4027   6.7814   2.6691   H         3 RES3   0.0000
    73 H6       3.6768   5.2573   4.5377   H         3 RES3   0.0000
    74 H7       1.8632   3.7184   5.1922   H         3 RES3   0.0000
    75 H8      -0.2526   3.7213   4.0077   H         3 RES3   0.0000
    76 C15      2.3752   8.0624   0.6801   C.3       3 RES3   0.0000
    77 Cl1     -2.1570   4.2462   2.3676   Cl        3 RES3   0.0000
    78 H1      -3.1302   5.5311   0.3664   H         3 RES3   0.0000
    79 H2      -3.4173   7.0216  -1.5468   H         3 RES3   0.0000
    80 H3      -1.5999   8.5586  -2.2161   H         3 RES3   0.0000
    81 H4       0.5077   8.5862  -1.0141   H         3 RES3   0.0000
    82 H151     3.2094   7.9764   1.2710   H         3 RES3   0.0000
    83 H152     2.0467   9.0537   0.7301   H         3 RES3   0.0000
    84 H153     2.5562   7.8874  -0.3380   H         3 RES3   0.0000
    85 Cl0      7.4307   1.2228   5.2598   Cl        4 RES4   0.0000
    86 C9       8.4622   0.3588   4.8717   C.3       4 RES4   0.0000
    87 C11      8.6686   1.2207   5.9629   C.3       4 RES4   0.0000
    88 C1       9.8886   1.2434   6.6890   C.2       4 RES4   0.0000
    89 C2      10.0545   2.0855   7.7572   C.2       4 RES4   0.0000
    90 C3       9.0222   2.9514   8.1385   C.2       4 RES4   0.0000
    91 C4       7.8385   2.9652   7.4624   C.2       4 RES4   0.0000
    92 C12      7.6093   2.1023   6.3523   C.3       4 RES4   0.0000
    93 C10      6.3927   2.0994   5.6505   C.3       4 RES4   0.0000
    94 C13      6.2040   1.2236   4.5634   C.3       4 RES4   0.0000
    95 C5       4.9752   1.1811   3.8171   C.2       4 RES4   0.0000
    96 C6       4.8203   0.3242   2.7719   C.2       4 RES4   0.0000
    97 C7       5.8513  -0.5456   2.3960   C.2       4 RES4   0.0000
    98 C8       7.0327  -0.5466   3.0612   C.2       4 RES4   0.0000
    99 C14      7.2476   0.3321   4.1578   C.3       4 RES4   0.0000
   100 H5       4.1635   1.8394   4.0915   H         4 RES4   0.0000
   101 H6       3.8895   0.3153   2.2229   H         4 RES4   0.0000
   102 H7       5.7030  -1.2236   1.5685   H         4 RES4   0.0000
   103 H8       7.8188  -1.2207   2.7529   H         4 RES4   0.0000
   104 C15      5.1911   3.1204   6.0805   C.3       4 RES4   0.0000
   105 Cl1      9.7233  -0.6958   4.3931   Cl        4 RES4   0.0000
   106 H1      10.6965   0.5891   6.3942   H         4 RES4   0.0000
   107 H2      10.9835   2.0796   8.3075   H         4 RES4   0.0000
   108 H3       9.1661   3.6166   8.9768   H         4 RES4   0.0000
   109 H4       7.0585   3.6442   7.7747   H         4 RES4   0.0000
   110 H151     4.3569   3.0344   5.4896   H         4 RES4   0.0000
   111 H152     5.5196   4.1117   6.0305   H         4 RES4   0.0000
   112 H153     5.0101   2.9454   7.0987   H         4 RES4   0.0000
@<TRIPOS>BOND
     1     1     2    1
     2     1     3    1
     3     1     8    1
     4     1     9    1
     5     1    10    1
     6     1    15    1
     7     2     3    1
     8     2    15    1
     9     2    21    1
    10     3     4    1
    11     3     8    1
    12     4     5   un
    13     4    22    1
    14     5     6   un
    15     5    23    1
    16     6     7   un
    17     6    24    1
    18     7     8    1
    19     7    25    1
    20     8     9    1
    21     9    10    1
    22     9    20    1
    23    10    11    1
    24    10    15    1
    25    11    12   un
    26    11    16    1
    27    12    13   un
    28    12    17    1
    29    13    14   un
    30    13    18    1
    31    14    15    1
    32    14    19    1
    33    20    26    1
    34    20    27    1
    35    20    28    1
    36    29    30    1
    37    29    31    1
    38    29    36    1
    39    29    37    1
    40    29    38    1
    41    29    43    1
    42    30    31    1
    43    30    43    1
    44    30    49    1
    45    31    32    1
    46    31    36    1
    47    32    33   un
    48    32    50    1
    49    33    34   un
    50    33    51    1
    51    34    35   un
    52    34    52    1
    53    35    36    1
    54    35    53    1
    55    36    37    1
    56    37    38    1
    57    37    48    1
    58    38    39    1
    59    38    43    1
    60    39    40   un
    61    39    44    1
    62    40    41   un
    63    40    45    1
    64    41    42   un
    65    41    46    1
    66    42    43    1
    67    42    47    1
    68    48    54    1
    69    48    55    1
    70    48    56    1
    71    57    58    1
    72    57    59    1
    73    57    64    1
    74    57    65    1
    75    57    66    1
    76    57    71    1
    77    58    59    1
    78    58    71    1
    79    58    77    1
    80    59    60    1
    81    59    64    1
    82    60    61   un
    83    60    78    1
    84    61    62   un
    85    61    79    1
    86    62    63   un
    87    62    80    1
    88    63    64    1
    89    63    81    1
    90    64    65    1
    91    65    66    1
    92    65    76    1
    93    66    67    1
    94    66    71    1
    95    67    68   un
    96    67    72    1
    97    68    69   un
    98    68    73    1
    99    69    70   un
   100    69    74    1
   101    70    71    1
   102    70    75    1
   103    76    82    1
   104    76    83    1
   105    76    84    1
   106    85    86    1
   107    85    87    1
   108    85    92    1
   109    85    93    1
   110    85    94    1
   111    85    99    1
   112    86    87    1
   113    86    99    1
   114    86   105    1
   115    87    88    1
   116    87    92    1
   117    88    89   un
   118    88   106    1
   119    89    90   un
   120    89   107    1
   121    90    91   un
   122    90   108    1
   123    91    92    1
   124    91   109    1
   125    92    93    1
   126    93    94    1
   127    93   104    1
   128    94    95    1
   129    94    99    1
   130    95    96   un
   131    95   100    1
   132    96    97   un
   133    96   101    1
   134    97    98   un
   135    97   102    1
   136    98    99    1
   137    98   103    1
   138   104   110    1
   139   104   111    1
   140   104   112    1
@<TRIPOS>SUBSTRUCTURE
     1 RES1        1 GROUP             0 ****  ****    0  
     2 RES2       29 GROUP             0 ****  ****    0  
     3 RES3       57 GROUP             0 ****  ****    0  
     4 RES4       85 GROUP             0 ****  ****    0  
@<TRIPOS>CRYSIN
    8.1970    9.8840   13.5800   90.0000   95.3300   90.0000    14     1
