# Supplementary material for: A Process for Modelling Diffuse Scattering from Disordered Molecular Crystals, Illustrated by Application to Monoclinic 9-Chloro-10-methylanthracene
Source: Hindawi journal article supplement (doi:10.1155/2015/878463), 2015-01-01
Supplement: f2 [file 878463.f2.zip › 878463.f2/CMA_simulations/with_CH3_1.qxyz]

     1     1     1     1  -0.387038   0.799082  -0.001707   0.460072   F      6.800000      3.719200     12.020401
     2     2     1     1  -0.001708  -0.460072   0.387037   0.799083   F     -0.495211      8.661199      8.261516
     3     3     1     1  -0.387037   0.799082  -0.001707   0.460072   T      0.135529      6.164800      1.500883
     4     4     1     1  -0.001705  -0.460074   0.387038   0.799081   T      7.430737      1.222800      5.259765
