# Supplementary material for: A Process for Modelling Diffuse Scattering from Disordered Molecular Crystals, Illustrated by Application to Monoclinic 9-Chloro-10-methylanthracene
Source: Hindawi journal article supplement (doi:10.1155/2015/878463), 2015-01-01
Supplement: f2 [file 878463.f2.zip › 878463.f2/CMA_simulations/with_CH3_2.zmat]

QQQFDY02 : Generated from the CSD
    28
x1        0   0.00000    0     0.00000    0     0.00000
C9        1   1.40037    0     0.00000    0     0.00000
C11       2   1.40569    1    60.97386    0     0.00000
C1        3   1.41991    2   122.20083    1  -179.84652
C2        4   1.37029    3   120.82937    2   179.31501
C3        5   1.40029    4   120.20069    3     0.78418
C4        6   1.36325    5   120.75193    4    -0.40823
C12       7   1.42460    6   121.33800    5    -0.14821
C10       8   1.40437    7   122.00699    3  -179.94295
C13       9   1.40869    8   120.19234    1    -0.20707
C5       10   1.43836    9   122.22645    1   179.98645
C6       11   1.36042   10   120.97296    9   179.95131
C7       12   1.40029   11   120.90451   10    -0.27114
C8       13   1.35585   12   120.68237   11     0.44755
C14      14   1.42150   13   120.65287   12    -0.23452
H5       11   1.08054   12   119.55974   10   179.96344
H6       12   1.08068   13   119.51638   11  -179.90512
H7       13   1.08000   14   119.67438   12   179.90673
H8       14   1.08054   15   119.71427   13  -179.86097
Cl1b      9   1.71220   10   119.99877    8   179.42031
C15b      2   1.63438   15   119.24524    3  -178.79356
H1        4   1.08051    5   119.61933    3  -179.92240
H2        5   1.07977    6   119.92517    4   179.87744
H3        6   1.07979    7   119.63744    5  -179.91746
H4        7   1.08029    8   119.32972    6   179.99531
H161     21   1.03126    2   110.33647   15   146.07350
H162     21   0.86939   26   120.31239    2  -128.90560
H163     21   0.94677   27   109.48058   26   105.66212
