# Supplementary material for: A Process for Modelling Diffuse Scattering from Disordered Molecular Crystals, Illustrated by Application to Monoclinic 9-Chloro-10-methylanthracene
Source: Hindawi journal article supplement (doi:10.1155/2015/878463), 2015-01-01
Supplement: f2 [file 878463.f2.zip › 878463.f2/progs/DISCLAIMER.txt]

--------------
DISCLAIMER 02/08/2014
--------------

ZMC is Licensed under the Academic Free License version 3.0. 

The ZMC software is provided without warranty of any kind. No liability is taken for any loss or damages, direct or indirect, that may result through the use of ZMC. No warranty is made with respect to any documentation, or the program and functions therein. There are no warranties that the programs are free of error, or that they are consistent with any standard, or that they will meet the requirement for a particular application. The programs and the manual have been checked. Nevertheless, it can not be guaranteed that the manual is up-to-date in every detail. Any documentation, ZMC program or supplementary codes,  may be changed without notice.

ZMC is intended as a public domain code. It may be used free of charge. Any commercial use (or modifications with the intention of proprietary purposes) is not allowed without the explicit written permission of the authors.

If you do end up using the program for your R&D purposes, then please be sure to reference this paper :

D.J.Goossens, A.P.Heerdegen, E.J.Chan and T.R.Welberry, �Monte Carlo Modelling of Diffuse Scattering from Single Crystals: The Program ZMC� Metallurgical and Materials Transactions A, 42A (2011) 23-31. DOI: 10.1007/s11661-010-0199-1
