# Supplementary material for: A Process for Modelling Diffuse Scattering from Disordered Molecular Crystals, Illustrated by Application to Monoclinic 9-Chloro-10-methylanthracene
Source: Hindawi journal article supplement (doi:10.1155/2015/878463), 2015-01-01
Supplement: f2 [file 878463.f2.zip › 878463.f2/progs/README.1ST]

----------------------------------------------------------------------------
ZMC, Windows distribution, README.1ST

(1) Introduction
(2) Installation
(3) Running
----------------------------------------------------------------------------
(1) Introduction

This archive contains binaries for running ZMC on Windows.  
It was developed on a Linux platform using Intel Fortran Compiler, 
whereas this Windows version was compiled using g95 (www.g95.org) 
version 0.92 on Windows XP.  The Windows version is not 
exhaustively tested, and not used routinely by the developer(s).

Please refer to ZMC's built-in help, and to the incomplete manual 
ZMC_handbook_incomplete.pdf and to the papers that use the program.

All use should reference the paper:
 D. J. Goossens, A. P. Heerdegen, E. J. Chan & T. R. Welberry, 'Monte
 Carlo Modelling of Diffuse Scattering from Single Crystals: The 
 Program ZMC' Metallurgical and Materials Transactions A, vol 42A, 
 (2011) 23-31.  DOI:10.1007/s11661-010-0199-1

Source code is also available, and binaries for other platforms may also be
available.  Program currently compiles wherever g95 version 0.92 is
available; has been tested to varying degrees on Debian x86, Debian AMD64, 
Debian PPC, Slackware 12.2, Mac OS X 10.5, Win98, Win XP, Win 7 (32 bit).  On
Linux, it should compile with g95 and ifort, but one of the modules (beyond
my scope, unfortunately, since provided by someone else) does not compile 
with gfortran, so gfortran is not used.

No guarantees/warranties are given or implied.  Use at
your own risk.  Caveat emptor.  Buyer beware.

And you get what you pay for...

If you download and use this, please send me an email to let me know.

darren.goossens@gmail.com

06 August 2012/March 2015

----------------------------------------------------------------------------
(2) Installation

Copy all the .exe files into a subdirectory and put the subdirectory
in your path.  Run the program from the system prompt.

That is it.

If you are unsure how to edit your path or use the command line, you should
find out, but usually in Windows you get at the path through 

Control Panel -> System -> Advanced Settings -> Environment Variables

If for example you out the files in C:\util\ZMC then add this to the end
of your path.

You could also just open your command prompt and type

PATH=%PATH%;c:\util\ZMC  <RETURN>

then type

PATH <RETURN>

just to check.  This adds it to your path just for this session.

OR you can just work in the same directory as where you put the binaries.

----------------------------------------------------------------------------
(3) Running

In the archive, you should find a /Simple_Simn directory.  It contains all the 
files you need to run a very simple simulation, then calculate the diffuse
scattering in three reciprocal space basal planes.

Below is a minimal session running ZMC from the command line.

(1) We run ZMC ($ indicates the command prompt).  
The input file is MC_keywords.inp, 
the output goes to Test1.extension, and the --diffuse flag means it is in a 
format suitable for the DZMC program.

(2) Then we run DZMC to produce the diffuse scattering, with the output going 
into hk0_Test1 given that we are calculating the hk0 cut.

(3) Then we convert the resulting binary file to a portable grey map (pgm) using bin2gray.

NOTES:

* The files below use very few MC cycles and very few lots; this is to make the 
example fast, it does _not_ result in a useful simulation.

** ZMC --help and ZMC --help2 both give some assistance.  Also bin2gray --help

*** Other toolbox programs (zmat_maker, for example) are included, please 
refer to their --help output.

**** MOST IMPORTANT: This is _not_ production-ready software.  It is a toolbox 
made by one scientist for his own use, and may have infelicities and problems.  
I am happy to enter a dialogue about this (goossens@rsc.anu.edu.au) but please 
remember I am one man and cannot always get back to you quickly.

 ----------------------------------------------------------------------------
 ----------------------------------------------------------------------------
$ ZMC --diffuse MC_keywords.inp  Test1
 ----------------------------------------------------------------------------
 This is ZMC version dated July 18 2011, a program for implementing 
 Monte Carlo simulations of crystal structures, primarily for the
 analysis of diffuse scattering.
  
 All use should reference the paper:
 D. J. Goossens, A. P. Heerdegen, E. J. Chan & T. R. Welberry, 'Monte
 Carlo Modelling of Diffuse Scattering from Single Crystals: The 
 Program ZMC' Metallurgical and Materials Transactions A, vol 42A, 
 (2011) 23-31.  DOI:10.1007/s11661-010-0199-1
  
 Invoke it with ZMC --help for some help, and ZMC --help2 for more help.
 ----------------------------------------------------------------------------
 Input file is MC_keywords.inp
 ----------------------------------------------------------------------------
 Output files have root name Test1.
 ----------------------------------------------------------------------------
 Cell parameters are:   5.0270  5.3600  7.3820115.7200101.0600 92.9100
 ----------------------------------------------------------------------------
 Value for NUMLOCS specified explicitly is:            1
 ----------------------------------------------------------------------------
 Value for NUMZMATS specified explicitly is:            1
 ----------------------------------------------------------------------------
 Number of z-matrix files to read:     1
 Reading z-matrix   1 of   1 from :                  reordered_1e.zmat
 - - - - - - - - - - - - - - - - - - - - - - - - - - - - - - - - - - - - - - 
TEPHTH12 : Generated from the CSD
    19
x1        0   0.00000    0     0.00000    0     0.00000
C1        1   1.38324    0     0.00000    0     0.00000
C2        2   1.39149    1    60.22241    0     0.00000
C3a       3   1.38753    2   119.79829    1     0.00606
C1a       4   1.39035    3   119.63299    2    -0.01204
C2a       5   1.39149    4   120.56871    3     0.01214
C3        6   1.38753    5   119.79829    4    -0.01216
C4        2   1.48323    7   119.89217    3  -179.92017
O1        8   1.25201    2   119.22657    7   177.39421
O2        8   1.28044    9   123.57618    2   179.87281
C4a       5   1.48323    6   119.53907    4  -179.92047
O2a      11   1.28044    5   117.19713    6  -177.59235
O1a      11   1.25201   12   123.57618    5   179.87520
H2A      12   0.93017   11   112.74720   13     1.41090
H4A       4   0.94111    5   120.58241    3   179.89873
H3A       6   0.97107    7   118.54591    5   177.87198
H2       10   0.93017    8   112.74720    9    -1.41090
H3        3   0.97107    4   118.54591    2  -177.87198
H4        7   0.94111    6   119.78451    2   179.89956
 ----------------------------------------------------------------------------
 Interrogation of qxyz files suggests there are    1 locations in unit cell.
 Value for NUMINTERNAL not specified explicitly
 for one or more z-matrices.
 Will try to work it out from other inputs.
 ----------------------------------------------------------------------------
 Crystal size is:     32    32    32
 ----------------------------------------------------------------------------
 No occupancy file given.  Will try to work out
 whether one is needed from QXYZ files.
 ----------------------------------------------------------------------------
 Occupancy structure worked out from QXYZ files.
 Unless there is an error this means there is no occupancy disorder.
 ----------------------------------------------------------------------------
 Constructing crystal
 Molecule type (z-matrix number):   1
 Initial widths for x,y,z are               0.25000  0.25000  0.25000
 Initial widths for q1,q2,q3,q4 are         0.01000  0.01000  0.01000  0.01000
 ----------------------------------------------------------------------------
 Quaternions and translations for z-matrix    1
 are in file reordered_1e.qxyz
 
                     Location):    1
  Sub structure (per location):    1
                    Quaternion:    0.797271   0.078913  -0.389459  -0.454371
                      Improper:    F
               COM Translation:    0.000000   0.000000   0.000000
 ----------------------------------------------------------------------------
 Interrogation of qxyz files suggests there are
 up to    1 instances of a z-matrix on a location.
 ----------------------------------------------------------------------------
 Model crystal populated.
 ----------------------------------------------------------------------------
 Header of contact vector file terephthalic_contacts_2 is... 
# ol  oz  om  oat da  db  dc  dl  dz  dm  dat      dist     type                                    
 Contact vector file has     26 rows.
 ----------------------------------------------------------------------------
 Contact vector file contains   8 contact vector types.
 ----------------------------------------------------------------------------
 Molecule type (z-matrix number):   1
 For  MC widths for x,y,z are               0.25000  0.25000  0.25000
 For  MC widths for q1,q2,q3,q4 are         0.01000  0.01000  0.01000  0.01000
 ----------------------------------------------------------------------------
 Value for MCCYCLES specified explicitly is:          10
 ----------------------------------------------------------------------------
 Value for TEMPERATURE specified explicitly is:    1.000000    
 ----------------------------------------------------------------------------
 Value for INCUPDATE specified explicitly is:            1
 ----------------------------------------------------------------------------
 Values for         BADJUST specified explicitly are:     1  2.00000
 ----------------------------------------------------------------------------
 Value for NUMINSPRCON not specified explicitly.
 ----------------------------------------------------------------------------
 Value for NUMSPRCON not specified explicitly.
 ----------------------------------------------------------------------------
 Contact type:    1  Sprcon: 100.000  Size effect:   0.000
 Contact type:    2  Sprcon:   1.000  Size effect:   0.000
 Contact type:    3  Sprcon:   1.000  Size effect:   0.000
 Contact type:    4  Sprcon:   1.000  Size effect:   0.000
 Contact type:    5  Sprcon:   1.000  Size effect:   0.000
 Contact type:    6  Sprcon:   1.000  Size effect:   0.000
 Contact type:    7  Sprcon:   1.000  Size effect:   0.000
 Contact type:    8  Sprcon:   1.000  Size effect:   0.000
 ----------------------------------------------------------------------------
 ----------------------------------------------------------------------------
 Value for NUMCROSS not specified explicitly
 for one or more z-matrices.
 Will try to work it out from other inputs.
 ----------------------------------------------------------------------------
 Initialisation completed.
 ----------------------------------------------------------------------------
 Header of input file is:
 Terephthalic acid; Emma's model E in in ZMC2
 ----------------------------------------------------------------------------
  %done: 10.0
  acc:   13183, up:    2997, rej:   16588, R/T: 0.51
 B_aim, B_current :   2.000000       1.725884    
  %done: 20.0
  acc:   12816, up:    4272, rej:   15680, R/T: 0.48
 B_aim, B_current :   2.000000       1.739106    
  %done: 30.0
  acc:   12882, up:    5758, rej:   14128, R/T: 0.43
 B_aim, B_current :   2.000000       1.744740    
  %done: 40.0
  acc:   12591, up:    7060, rej:   13117, R/T: 0.40
 B_aim, B_current :   2.000000       1.767216    
  %done: 50.0
  acc:   12512, up:    8132, rej:   12124, R/T: 0.37
 B_aim, B_current :   2.000000       1.799040    
  %done: 60.0
  acc:   12741, up:    9046, rej:   10981, R/T: 0.34
 B_aim, B_current :   2.000000       1.825201    
  %done: 70.0
  acc:   12675, up:    9553, rej:   10540, R/T: 0.32
 B_aim, B_current :   2.000000       1.848830    
  %done: 80.0
  acc:   12113, up:   10083, rej:   10572, R/T: 0.32
 B_aim, B_current :   2.000000       1.889348    
  %done: 90.0
  acc:   11325, up:   10003, rej:   11440, R/T: 0.35
 B_aim, B_current :   2.000000       1.952810    
  %done:100.0
 ----------------------------------------------------------------------------
 Molecule type (z-matrix number):   1
 Widths for increments on x,y,z are         0.08042  0.25097  0.09065
 Widths for increments on q1,q2,q3,q4 are   0.01250  0.00328  0.01953  0.06397
 No internal d.f.
 ----------------------------------------------------------------------------
 Globally scaled intermolecular spring constants are:
           1   79.52365    
           2  0.7952365    
           3  0.7952365    
           4  0.7952365    
           5  0.7952365    
           6  0.7952365    
           7  0.7952365    
           8  0.7952365    
 ----------------------------------------------------------------------------
 Writing file for DIFFUSE calculation Test1.diffuse
 Location    1 can have    1 type(s) of z-matrix(ices).
 These are types           1
 Type    1 is in    1 orientation(s) on that location.
 These are orientation(s):    1
 ----------------------------------------------------------------------------
 Possible atom sites:          18
 Of which at most          18  can be occupied.
 Exiting normally.
 ----------------------------------------------------------------------------
$ DZMC Test1.diffuse 
  
 DIFFUSE -  Ver. 2.1a  - May 11, 1995
  
 diffuse.in filename?
diffuse.hk0
 
  
   The computation volume is defined by:
     ( -4.00, -4.50,  0.00) => (  4.43, -4.50,  0.00)
     ( -4.00, -4.50,  0.00) => ( -4.43,  4.50,  0.00)
     ( -4.00, -4.50,  0.00) => ( -4.00, -4.50,  0.00)
   Image size is          400  X          400  X            1
   sin(theta)/lambda maximum =   0.6870000    
   Random number seeds are:        12645        9676
   Crystal size is:           32          32          32
   Periodic boundary? Y
   Number of atom sites per cell :           18
   Number of Atom types:            3
   Lot Size is:            9           9           6
   Number of Lots to Compute:            3
   Subtract Average Lattice? e
  
 intensity file?
hk0_Test1
hk0_Test1                       
   Average Structure ...
    Site #            1  :
 ----------------------------------------------------------------------------
 Reading in MC crystal from file Test1.diffuse
 Crystal dimensions are:           32          32          32
 There are           18  sites in the unit cell.
 Of which at most           18  can be occupied at once.
 ----------------------------------------------------------------------------
      C   atom at (-0.142 0.148 0.146), xocc =  1.00, Biso =  2.084
    Site #            2  :
      C   atom at ( 0.020-0.040 0.176), xocc =  1.00, Biso =  2.090
    Site #            3  :
      C   atom at ( 0.162-0.188 0.029), xocc =  1.00, Biso =  2.168
    Site #            4  :
      C   atom at ( 0.142-0.148-0.146), xocc =  1.00, Biso =  2.080
    Site #            5  :
      C   atom at (-0.021 0.039-0.176), xocc =  1.00, Biso =  2.091
    Site #            6  :
      C   atom at (-0.163 0.188-0.030), xocc =  1.00, Biso =  2.174
    Site #            7  :
      C   atom at (-0.293 0.306 0.303), xocc =  1.00, Biso =  2.283
    Site #            8  :
      O   atom at (-0.281 0.261 0.457), xocc =  1.00, Biso =  2.300
    Site #            9  :
      O   atom at (-0.432 0.484 0.272), xocc =  1.00, Biso =  2.671
    Site #           10  :
      C   atom at ( 0.293-0.306-0.304), xocc =  1.00, Biso =  2.274
    Site #           11  :
      O   atom at ( 0.432-0.484-0.273), xocc =  1.00, Biso =  2.656
    Site #           12  :
      O   atom at ( 0.281-0.261-0.457), xocc =  1.00, Biso =  2.292
    Site #           13  :
      H   atom at ( 0.525-0.572-0.375), xocc =  1.00, Biso =  2.907
    Site #           14  :
      H   atom at ( 0.272-0.315 0.049), xocc =  1.00, Biso =  2.436
    Site #           15  :
      H   atom at (-0.042 0.065-0.300), xocc =  1.00, Biso =  2.223
    Site #           16  :
      H   atom at (-0.526 0.572 0.375), xocc =  1.00, Biso =  2.924
    Site #           17  :
      H   atom at ( 0.042-0.065 0.300), xocc =  1.00, Biso =  2.222
    Site #           18  :
      H   atom at (-0.272 0.315-0.050), xocc =  1.00, Biso =  2.445
   
   --------------------------
   Reciprocal plane #            1
   --------------------------
   Average Scattering from 5% of Crystal ...
  
   All done!
  
$ bin2gray hk0_Test1
 File hk0_Test1 opened and irlen = 1600
 
 ---------------------------------------------------
 
 ---------------------------------------------------
 
   The computation volume is defined by:
     (  -4.00,  -4.50,   0.00) => (   4.43,  -4.50,   0.00)
     (  -4.00,  -4.50,   0.00) => (  -4.43,   4.50,   0.00)
     (  -4.00,  -4.50,   0.00) => (  -4.00,  -4.50,   0.00)
   Image size is 400 X 400 X 1
   sin(theta)/lambda maximum =   0.6870000    
   Crystal size is:     32  32  32
   Lot Size is:         9  9  6
   Number of Lots Computed: 3
   Subtract Average Lattice? e
  
  Working on plane # 1/1 ...
     Range =    5.868739E-03  =>    603.9745    
     Mean , STD  =    16.2323654321304        40.7605447194312     
     Normalizing to    65535.00    
 Writing pgm hk0_Test1.pgm
$ 
