# Supplementary material for: A Process for Modelling Diffuse Scattering from Disordered Molecular Crystals, Illustrated by Application to Monoclinic 9-Chloro-10-methylanthracene
Source: Hindawi journal article supplement (doi:10.1155/2015/878463), 2015-01-01
Supplement: f2 [file 878463.f2.zip › 878463.f2/progs/ZMC_source/chkmol2.f90]

program chkmol2

  use mol2_class
  use cmdline_arguments, only: get_options, bad_options, have_args, option_exists, &
      has_value, get_value, assignment(=), next_arg, num_args
  use iso_varying_string
  use file_functions, only: stderr
  use string_functions, only: join

  implicit none

  !! $Log: catmol2.f90,v $
  !! Revision 1.1  2006/05/18 01:30:26  aidan
  !! Initial revision
  !!

  ! Revision control software updates this character parameter.
  ! The 'ident' command can extract this version string from an
  ! object file or executable, which means one can identify which
  ! version of the module was used to compile it.
  character(len=*), parameter :: version = "$Id: catmol2.f90,v 1.1 2006/05/18 01:30:26 aidan Exp $"

  type (mol2_object)              :: all, input

  integer :: error
  
  type (varying_string) ::  myoptions(1)

  ! These are our accepted command line options (see subroutine usage for
  ! an explanation)

  myoptions(1) = 'help'

  ! This call parses the command line arguments for command line options
  call get_options(myoptions, error)

  ! Check we weren't passed duff options -- spit the dummy if we were
  if (error > 0) then
     write(stderr,*) 'ERROR! Unknown options: ',join(bad_options()," ")
     call usage
     STOP
  end if

  ! Check if we just want to print the usage
  if (option_exists('help')) then
     call usage
     STOP
  end if

  if ( .not. have_args() ) then
     write(stderr,*) "Must provide mol2 filenames as command line arguments"
     call usage
     stop
  end if

  do while (have_args())

     input = char(next_arg())

     call print(input)

  end do

contains

  subroutine usage
    
    write(stderr,*)
    write(stderr,*) 'chkmol2 just reads in a mol2 file and prints it out again.'
    write(stderr,*)
    write(stderr,*) 'Usage: chkmol2 <mol2 file> <mol2 file> ...'
    write(stderr,*)
    write(stderr,*) '  Options:'
    write(stderr,*)
    write(stderr,*) '  --help          - print this message'
    write(stderr,*)

  end subroutine usage
  
end program chkmol2
