# Supplementary material for: A Process for Modelling Diffuse Scattering from Disordered Molecular Crystals, Illustrated by Application to Monoclinic 9-Chloro-10-methylanthracene
Source: Hindawi journal article supplement (doi:10.1155/2015/878463), 2015-01-01
Supplement: f2 [file 878463.f2.zip › 878463.f2/progs/ZMC_source/fundamental_constants.f90]

module fundamental_constants

  implicit none

  public

  ! Pi -- reference http://www.lacim.uqam.ca/piDATA/pi.html
  ! Ratio of the circumference of a circle to it's diameter
  ! Can be computed as acos( -1.0d0 )
  double precision, parameter :: pi = 3.14159265358979d0

  ! Radian (in degrees) = 180/pi degrees
  double precision, parameter :: radian = 57.29577951308232088d0

end module fundamental_constants 
