# Supplementary material for: A Process for Modelling Diffuse Scattering from Disordered Molecular Crystals, Illustrated by Application to Monoclinic 9-Chloro-10-methylanthracene
Source: Hindawi journal article supplement (doi:10.1155/2015/878463), 2015-01-01
Supplement: f2 [file 878463.f2.zip › 878463.f2/progs/ZMC_source/README.NOW]

In here I have a flat directory structure for compiling ZMC
without complex libraries etc.  The idea is to make static
binaries of all useful programs in a simpleminded way.

Note that at present there is a Windows version of bin2gray,
which differs only a little from Mac/Linux.

$ diff bin2gray.f90 bin2gray_win32.f90
267,268c267,268
<         write(stdout,'(A,1t,3(I0,2X))') '   Crystal size is: ',(csize(i), i=1,3)
<         write(stdout,'(A,1t,3(I0,2X))') '   Lot Size is: ',(ls_xyz(i), i=1,3)
---
>         write(stdout,'(A,1x,3(I0,2X))') '   Crystal size is: ',(csize(i), i=1,3)
>         write(stdout,'(A,1x,3(I0,2X))') '   Lot Size is: ',(ls_xyz(i), i=1,3)

at present what I do is this, noting that it is quite specific to how I have my work computer
set up (a Mac with a Windows xp VM plus the ability to mount my Linux server account on the 
Mac plus ssh access into the Linux account):

(1) Copy current ZMC (and any other program that has been updated, including likely
zmc_documentation.txt) into ~/ZMC/flat and into ~/ZMC/flat/ZMC_source
(2) Remove any old versions
(3) Update 
    (a) compile_all.bat
    (b) compile_all_Linux.sh
    (c) compile_all_Mac.sh
to reflect any new filenames.  KEEP compile commands in the same order unless
module dependencies have changed.
(4) Login on Linux, run compile_all_Linux.sh and check that the files in ZMCLinux all have today's date.
(5) Mount my account on my Mac and run compile_all_Mac.sh.  NOTE that it overwrites the .mod and .o files
from the Linux compile -- I have chosen this since it avoids too many copies of the code.
(6) Copy ~/ZMC/flat to my xp VM, run compile_all.bat then copy X:\ZMC\flat\ZMCWin back to Linux
(7) Then I have the binaries in three subdirectories, ZMCLinux, ZMCMac and ZMCWin.  Then for example:
    (a) tar c -vzf ZMC_Linux_package_Aug08_2012.tar.gz ZMCLinux
    (b) tar c -vzf ZMC_Mac_package_Aug08_2012.tar.gz ZMCMac
    (c) zip -r ZMC_win32_package_Aug08_2012.zip ZMCWin
    (d) tar c -vzf ZMC_source_package_Aug08_2012.tar.gz ZMC_source
(8) Upload to my website
(9) Update my website to reflect any changed file names.

Darren Goossens
goossens@rsc.anu.edu.au
08 August 2012
