# Supplementary material for: A Process for Modelling Diffuse Scattering from Disordered Molecular Crystals, Illustrated by Application to Monoclinic 9-Chloro-10-methylanthracene
Source: Hindawi journal article supplement (doi:10.1155/2015/878463), 2015-01-01
Supplement: f2 [file 878463.f2.zip › 878463.f2/progs/ZMC_source/Simple_Simn/diffuse.0kl]

terephthalic 0kl section
12645,9676                        	!Random number seeds
  5.0270    5.3600    7.3820  -0.46515108 -0.19183685 -0.050767249
32 32 32                      		!Size of crystal simulation (unit cells)
Y                    			!Periodic Boundary?
-0.0,-1.769,-5.2163                 	!Origin of volume
 0.0,5.056,-5.216, 400   v-axis and number of divisions corrected by fit to actual patter
-0.0,-5.0560,5.216, 400             !u-axis and number of divisions
-0.0, -1.769, -5.216, 1               !w-axis and number of divisions  
0.687                            !sin(theta)/lambda maximum
9,9,6                 !Lot size
300                !Number of lots
18                            !Number of atom sites per cell
3                              !Number of atom types
e                             !Subtract average lattice?
'C '                           !
2.31,25.8439,1.02,15.2075
1.58860,5.5687,0.865,56.6512,0.2156
0.0,0.0                   !fprime, f-double-prime
'O '                           !
3.0485,18.2771,2.2868,10.7011
1.5463,5.3239,0.867,37.9089,0.2508
0.0,0.0                   !fprime, f-double-prime
'H '                           !
0.0000,0.0000,0.0000,00.0000
0.0000,00.0000,0.0000,0.0000,000.000
0.0,0.0                   !fprime, f-double-prime


'S '
6.0485,18.2771,4.5868,10.7011
3.0463,5.3239,1.667,37.9089,0.5008
0.0,0.0                   !fprime, f-double-prime
