# Supplementary material for: A Process for Modelling Diffuse Scattering from Disordered Molecular Crystals, Illustrated by Application to Monoclinic 9-Chloro-10-methylanthracene
Source: Hindawi journal article supplement (doi:10.1155/2015/878463), 2015-01-01
Supplement: f2 [file 878463.f2.zip › 878463.f2/progs/ZMC_source/Simple_Simn/MC_keywords.inp]

!!
!! I would like to acknowledge the work of Emma Anderson of
!! ANU in creating this example simulation.
!!
HEADER Terephthalic acid; Emma's model E in in ZMC2
!!
!! Crystal geometry information
!!
CRYSTAL 32 32 32
ZMATFILE  1  reordered_1e.zmat
QXYZFILE  1  reordered_1e.qxyz
CELL   5.0270    5.3600    7.3820  115.7200  101.0600   92.9100  
QINITW 0.01
XYZINITW 0.25
!!INTERNAL ZMAT 1 INT 1 dihedral 9
!!INTERNAL ZMAT 1 INT 2 dihedral 12
!!
!! Contact vector list
!!
CONTACTFILE terephthalic_contacts_2.contacts
!!
!! MC parameters
!!
TEMPERATURE 1.0
MCCYCLES 10
XYZWIDTH 0.25
QWIDTH 0.01
!!INWIDTH 0.0
SPRCON 1.0
SPRCON 100.0 1
!!INSPR  0.0 ZMAT 1 INT 1 2
INCUPDATE 1
BADJUST   1  2.0
!!
!! Cross Term Stuff
!!
!! NUMCROSS ZMAT 1 0
!! CROSSDEF ZMAT 1 CROSS 1 INT 1 2
!! CROSSSPR 11.1 ZMAT 1 CROSS 1 
!!
!! For error checking, we can put some things in explicitely
!!
NUMZMATS 1
NUMLOCS 1
!!NUMINSPRCON 1
!!NUMSPRCON 41
!!NUMINTERNAL ZMAT 1 1
!!
!! Contact Vector Production
!!
NEWCONTACTS TPA_CON_DJG
VMIN 0.0
VMAX 5.0
CONTATOMS ZMAT 1 1 9 10 12 13 14 15 16 17 18 19
!!CONTATOMS ZMAT 2 15 16 
