# Supplementary material for: A Process for Modelling Diffuse Scattering from Disordered Molecular Crystals, Illustrated by Application to Monoclinic 9-Chloro-10-methylanthracene
Source: Hindawi journal article supplement (doi:10.1155/2015/878463), 2015-01-01
Supplement: f2 [file 878463.f2.zip › 878463.f2/progs/ZMC_source/Simple_Simn/reordered_1e.zmat]

TEPHTH12 : Generated from the CSD
    19
x1       0   0.00000    0     0.00000    0     0.00000
C1        1   1.38324    0     0.00000    0     0.00000
C2        2   1.39149    1    60.22241    0     0.00000
C3a       3   1.38753    2   119.79829    1     0.00606
C1a       4   1.39035    3   119.63299    2    -0.01204
C2a       5   1.39149    4   120.56871    3     0.01214
C3        6   1.38753    5   119.79829    4    -0.01216
C4        2   1.48323    7   119.89217    3  -179.92017
O1        8   1.25201    2   119.22657    7   177.39421
O2        8   1.28044    9   123.57618    2   179.87281
C4a       5   1.48323    6   119.53907    4  -179.92047
O2a      11   1.28044    5   117.19713    6  -177.59235
O1a      11   1.25201   12   123.57618    5   179.87520
H2A      12   0.93017   11   112.74720   13     1.41090
H4A       4   0.94111    5   120.58241    3   179.89873
H3A       6   0.97107    7   118.54591    5   177.87198
H2       10   0.93017    8   112.74720    9    -1.41090
H3        3   0.97107    4   118.54591    2  -177.87198
H4        7   0.94111    6   119.78451    2   179.89956
