# Supplementary material for: A Process for Modelling Diffuse Scattering from Disordered Molecular Crystals, Illustrated by Application to Monoclinic 9-Chloro-10-methylanthracene
Source: Hindawi journal article supplement (doi:10.1155/2015/878463), 2015-01-01
Supplement: f2 [file 878463.f2.zip › 878463.f2/progs/ZMC_source/Simple_Simn/terephthalic_contacts_2.contacts]

# ol  oz  om  oat da  db  dc  dl  dz  dm  dat      dist     type
   1   1   1   9  -1   1   1   1   1   1  14    1.69299996     1
   1   1   1  14   1  -1  -1   1   1   1   9    1.69299996     1
   1   1   1  17  -1   1   1   1   1   1  13    1.69299996     1
   1   1   1  13   1  -1  -1   1   1   1  17    1.69299996     1
   1   1   1  13   0   0  -1   1   1   1  18    2.58100009     2
   1   1   1  18   0   0   1   1   1   1  13    2.58100009     2
   1   1   1  16   0   0  -1   1   1   1   9    2.58100009     2
   1   1   1   9   0   0   1   1   1   1  16    2.58100009     2
   1   1   1  10  -1   1   0   1   1   1  15    2.61599994     3
   1   1   1  15   1  -1   0   1   1   1  10    2.61599994     3
   1   1   1  19  -1   1   0   1   1   1  12    2.61599994     3
   1   1   1  12   1  -1   0   1   1   1  19    2.61599994     3
   1   1   1   7  -1   0   0   1   1   1  11    3.33999991     4
   1   1   1  11   1   0   0   1   1   1   7    3.33999991     4
   1   1   1   4   1   0   0   1   1   1   8    3.33999991     4
   1   1   1   8  -1   0   0   1   1   1   4    3.33999991     4
   1   1   1  11   0  -1  -1   1   1   1   8    3.49600005     5
   1   1   1   8   0   1   1   1   1   1  11    3.49600005     5
   1   1   1   7   0   1   0   1   1   1   4    3.44600010     6
   1   1   1   4   0  -1   0   1   1   1   7    3.44600010     6
   1   1   1   8  -1   0   0   1   1   1   3    3.58599997     7
   1   1   1   3   1   0   0   1   1   1   8    3.58599997     7
   1   1   1  11   1   0   0   1   1   1   6    3.58599997     7
   1   1   1   6  -1   0   0   1   1   1  11    3.58599997     7
   1   1   1  19  -1   1   0   1   1   1  15    3.08899999     8
   1   1   1  15   1  -1   0   1   1   1  19    3.08899999     8
