# Supplementary material for: A Process for Modelling Diffuse Scattering from Disordered Molecular Crystals, Illustrated by Application to Monoclinic 9-Chloro-10-methylanthracene
Source: Hindawi journal article supplement (doi:10.1155/2015/878463), 2015-01-01
Supplement: f2 [file 878463.f2.zip › 878463.f2/progs/ZMC_source/Simple_Simn/Test1.diffuse]

          32          32          32          18          18
           1           1           1
      1      1
      2      2
      3      3
      4      4
      5      5
      6      6
      7      7
      8      8
      9      9
     10     10
     11     11
     12     12
     13     13
     14     14
     15     15
     16     16
     17     17
     18     18
           1           1           2
      1      1
      2      2
      3      3
      4      4
      5      5
      6      6
      7      7
      8      8
      9      9
     10     10
     11     11
     12     12
     13     13
     14     14
     15     15
     16     16
     17     17
     18     18
           1           1           3
      1      1
      2      2
      3      3
      4      4
      5      5
      6      6
      7      7
      8      8
      9      9
     10     10
     11     11
     12     12
     13     13
     14     14
     15     15
     16     16
     17     17
     18     18
           1           1           4
      1      1
      2      2
      3      3
      4      4
      5      5
      6      6
      7      7
      8      8
      9      9
     10     10
     11     11
     12     12
     13     13
     14     14
     15     15
     16     16
     17     17
     18     18
           1           1           5
      1      1
      2      2
      3      3
      4      4
      5      5
      6      6
      7      7
      8      8
      9      9
     10     10
     11     11
     12     12
     13     13
     14     14
     15     15
     16     16
     17     17
     18     18
           1           1           6
      1      1
      2      2
      3      3
      4      4
      5      5
      6      6
      7      7
      8      8
      9      9
     10     10
     11     11
     12     12
     13     13
     14     14
     15     15
     16     16
     17     17
     18     18
           1           1           7
      1      1
      2      2
      3      3
      4      4
      5      5
      6      6
      7      7
      8      8
      9      9
     10     10
     11     11
     12     12
     13     13
     14     14
     15     15
     16     16
     17     17
     18     18
           1           1           8
      1      1
      2      2
      3      3
      4      4
      5      5
      6      6
      7      7
      8      8
      9      9
     10     10
     11     11
     12     12
     13     13
     14     14
     15     15
     16     16
     17     17
     18     18
           1           1           9
      1      1
      2      2
      3      3
      4      4
      5      5
      6      6
      7      7
      8      8
      9      9
     10     10
     11     11
     12     12
     13     13
     14     14
     15     15
     16     16
     17     17
     18     18
           1           1          10
      1      1
      2      2
      3      3
      4      4
      5      5
      6      6
      7      7
      8      8
      9      9
     10     10
     11     11
     12     12
     13     13
     14     14
     15     15
     16     16
     17     17
     18     18
           1           1          11
      1      1
      2      2
      3      3
      4      4
      5      5
      6      6
      7      7
      8      8
      9      9
     10     10
     11     11
     12     12
     13     13
     14     14
     15     15
     16     16
     17     17
     18     18
           1           1          12
      1      1
      2      2
      3      3
      4      4
      5      5
      6      6
      7      7
      8      8
      9      9
     10     10
     11     11
     12     12
     13     13
     14     14
     15     15
     16     16
     17     17
     18     18
           1           1          13
      1      1
      2      2
      3      3
      4      4
      5      5
      6      6
      7      7
      8      8
      9      9
     10     10
     11     11
     12     12
     13     13
     14     14
     15     15
     16     16
     17     17
     18     18
           1           1          14
      1      1
      2      2
      3      3
      4      4
      5      5
      6      6
      7      7
      8      8
      9      9
     10     10
     11     11
     12     12
     13     13
     14     14
     15     15
     16     16
     17     17
     18     18
           1           1          15
      1      1
      2      2
      3      3
      4      4
      5      5
      6      6
      7      7
      8      8
      9      9
     10     10
     11     11
     12     12
     13     13
     14     14
     15     15
     16     16
     17     17
     18     18
           1           1          16
      1      1
      2      2
      3      3
      4      4
      5      5
      6      6
      7      7
      8      8
      9      9
     10     10
     11     11
     12     12
     13     13
     14     14
     15     15
     16     16
     17     17
     18     18
           1           1          17
      1      1
      2      2
      3      3
      4      4
      5      5
      6      6
      7      7
      8      8
      9      9
     10     10
     11     11
     12     12
     13     13
     14     14
     15     15
     16     16
     17     17
     18     18
           1           1          18
      1      1
      2      2
      3      3
      4      4
      5      5
      6      6
      7      7
      8      8
      9      9
     10     10
     11     11
     12     12
     13     13
     14     14
     15     15
     16     16
     17     17
     18     18
           1           1          19
      1      1
      2      2
      3      3
      4      4
      5      5
      6      6
      7      7
      8      8
      9      9
     10     10
     11     11
     12     12
     13     13
     14     14
     15     15
     16     16
     17     17
     18     18
           1           1          20
      1      1
      2      2
      3      3
      4      4
      5      5
      6      6
      7      7
      8      8
      9      9
     10     10
     11     11
     12     12
     13     13
     14     14
     15     15
     16     16
     17     17
     18     18
           1           1          21
      1      1
      2      2
      3      3
      4      4
      5      5
      6      6
      7      7
      8      8
      9      9
     10     10
     11     11
     12     12
     13     13
     14     14
     15     15
     16     16
     17     17
     18     18
           1           1          22
      1      1
      2      2
      3      3
      4      4
      5      5
      6      6
      7      7
      8      8
      9      9
     10     10
     11     11
     12     12
     13     13
     14     14
     15     15
     16     16
     17     17
     18     18
           1           1          23
      1      1
      2      2
      3      3
      4      4
      5      5
      6      6
      7      7
      8      8
      9      9
     10     10
     11     11
     12     12
     13     13
     14     14
     15     15
     16     16
     17     17
     18     18
           1           1          24
      1      1
      2      2
      3      3
      4      4
      5      5
      6      6
      7      7
      8      8
      9      9
     10     10
     11     11
     12     12
     13     13
     14     14
     15     15
     16     16
     17     17
     18     18
           1           1          25
      1      1
      2      2
      3      3
      4      4
      5      5
      6      6
      7      7
      8      8
      9      9
     10     10
     11     11
     12     12
     13     13
     14     14
     15     15
     16     16
     17     17
     18     18
           1           1          26
      1      1
      2      2
      3      3
      4      4
      5      5
      6      6
      7      7
      8      8
      9      9
     10     10
     11     11
     12     12
     13     13
     14     14
     15     15
     16     16
     17     17
     18     18
           1           1          27
      1      1
      2      2
      3      3
      4      4
      5      5
      6      6
      7      7
      8      8
      9      9
     10     10
     11     11
     12     12
     13     13
     14     14
     15     15
     16     16
     17     17
     18     18
           1           1          28
      1      1
      2      2
      3      3
      4      4
      5      5
      6      6
      7      7
      8      8
      9      9
     10     10
     11     11
     12     12
     13     13
     14     14
     15     15
     16     16
     17     17
     18     18
           1           1          29
      1      1
      2      2
      3      3
      4      4
      5      5
      6      6
      7      7
      8      8
      9      9
     10     10
     11     11
     12     12
     13     13
     14     14
     15     15
     16     16
     17     17
     18     18
           1           1          30
      1      1
      2      2
      3      3
      4      4
      5      5
      6      6
      7      7
      8      8
      9      9
     10     10
     11     11
     12     12
     13     13
     14     14
     15     15
     16     16
     17     17
     18     18
           1           1          31
      1      1
      2      2
      3      3
      4      4
      5      5
      6      6
      7      7
      8      8
      9      9
     10     10
     11     11
     12     12
     13     13
     14     14
     15     15
     16     16
     17     17
     18     18
           1           1          32
      1      1
      2      2
      3      3
      4      4
      5      5
      6      6
      7      7
      8      8
      9      9
     10     10
     11     11
     12     12
     13     13
     14     14
     15     15
     16     16
     17     17
     18     18
           1           2           1
      1      1
      2      2
      3      3
      4      4
      5      5
      6      6
      7      7
      8      8
      9      9
     10     10
     11     11
     12     12
     13     13
     14     14
     15     15
     16     16
     17     17
     18     18
           1           2           2
      1      1
      2      2
      3      3
      4      4
      5      5
      6      6
      7      7
      8      8
      9      9
     10     10
     11     11
     12     12
     13     13
     14     14
     15     15
     16     16
     17     17
     18     18
           1           2           3
      1      1
      2      2
      3      3
      4      4
      5      5
      6      6
      7      7
      8      8
      9      9
     10     10
     11     11
     12     12
     13     13
     14     14
     15     15
     16     16
     17     17
     18     18
           1           2           4
      1      1
      2      2
      3      3
      4      4
      5      5
      6      6
      7      7
      8      8
      9      9
     10     10
     11     11
     12     12
     13     13
     14     14
     15     15
     16     16
     17     17
     18     18
           1           2           5
      1      1
      2      2
      3      3
      4      4
      5      5
      6      6
      7      7
      8      8
      9      9
     10     10
     11     11
     12     12
     13     13
     14     14
     15     15
     16     16
     17     17
     18     18
           1           2           6
      1      1
      2      2
      3      3
      4      4
      5      5
      6      6
      7      7
      8      8
      9      9
     10     10
     11     11
     12     12
     13     13
     14     14
     15     15
     16     16
     17     17
     18     18
           1           2           7
      1      1
      2      2
      3      3
      4      4
      5      5
      6      6
      7      7
      8      8
      9      9
     10     10
     11     11
     12     12
     13     13
     14     14
     15     15
     16     16
     17     17
     18     18
           1           2           8
      1      1
      2      2
      3      3
      4      4
      5      5
      6      6
      7      7
      8      8
      9      9
     10     10
     11     11
     12     12
     13     13
     14     14
     15     15
     16     16
     17     17
     18     18
           1           2           9
      1      1
      2      2
      3      3
      4      4
      5      5
      6      6
      7      7
      8      8
      9      9
     10     10
     11     11
     12     12
     13     13
     14     14
     15     15
     16     16
     17     17
     18     18
           1           2          10
      1      1
      2      2
      3      3
      4      4
      5      5
      6      6
      7      7
      8      8
      9      9
     10     10
     11     11
     12     12
     13     13
     14     14
     15     15
     16     16
     17     17
     18     18
           1           2          11
      1      1
      2      2
      3      3
      4      4
      5      5
      6      6
      7      7
      8      8
      9      9
     10     10
     11     11
     12     12
     13     13
     14     14
     15     15
     16     16
     17     17
     18     18
           1           2          12
      1      1
      2      2
      3      3
      4      4
      5      5
      6      6
      7      7
      8      8
      9      9
     10     10
     11     11
     12     12
     13     13
     14     14
     15     15
     16     16
     17     17
     18     18
           1           2          13
      1      1
      2      2
      3      3
      4      4
      5      5
      6      6
      7      7
      8      8
      9      9
     10     10
     11     11
     12     12
     13     13
     14     14
     15     15
     16     16
     17     17
     18     18
           1           2          14
      1      1
      2      2
      3      3
      4      4
      5      5
      6      6
      7      7
      8      8
      9      9
     10     10
     11     11
     12     12
     13     13
     14     14
     15     15
     16     16
     17     17
     18     18
           1           2          15
      1      1
      2      2
      3      3
      4      4
      5      5
      6      6
      7      7
      8      8
      9      9
     10     10
     11     11
     12     12
     13     13
     14     14
     15     15
     16     16
     17     17
     18     18
           1           2          16
      1      1
      2      2
      3      3
      4      4
      5      5
      6      6
      7      7
      8      8
      9      9
     10     10
     11     11
     12     12
     13     13
     14     14
     15     15
     16     16
     17     17
     18     18
           1           2          17
      1      1
      2      2
      3      3
      4      4
      5      5
      6      6
      7      7
      8      8
      9      9
     10     10
     11     11
     12     12
     13     13
     14     14
     15     15
     16     16
     17     17
     18     18
           1           2          18
      1      1
      2      2
      3      3
      4      4
      5      5
      6      6
      7      7
      8      8
      9      9
     10     10
     11     11
     12     12
     13     13
     14     14
     15     15
     16     16
     17     17
     18     18
           1           2          19
      1      1
      2      2
      3      3
      4      4
      5      5
      6      6
      7      7
      8      8
      9      9
     10     10
     11     11
     12     12
     13     13
     14     14
     15     15
     16     16
     17     17
     18     18
           1           2          20
      1      1
      2      2
      3      3
      4      4
      5      5
      6      6
      7      7
      8      8
      9      9
     10     10
     11     11
     12     12
     13     13
     14     14
     15     15
     16     16
     17     17
     18     18
           1           2          21
      1      1
      2      2
      3      3
      4      4
      5      5
      6      6
      7      7
      8      8
      9      9
     10     10
     11     11
     12     12
     13     13
     14     14
     15     15
     16     16
     17     17
     18     18
           1           2          22
      1      1
      2      2
      3      3
      4      4
      5      5
      6      6
      7      7
      8      8
      9      9
     10     10
     11     11
     12     12
     13     13
     14     14
     15     15
     16     16
     17     17
     18     18
           1           2          23
      1      1
      2      2
      3      3
      4      4
      5      5
      6      6
      7      7
      8      8
      9      9
     10     10
     11     11
     12     12
     13     13
     14     14
     15     15
     16     16
     17     17
     18     18
           1           2          24
      1      1
      2      2
      3      3
      4      4
      5      5
      6      6
      7      7
      8      8
      9      9
     10     10
     11     11
     12     12
     13     13
     14     14
     15     15
     16     16
     17     17
     18     18
           1           2          25
      1      1
      2      2
      3      3
      4      4
      5      5
      6      6
      7      7
      8      8
      9      9
     10     10
     11     11
     12     12
     13     13
     14     14
     15     15
     16     16
     17     17
     18     18
           1           2          26
      1      1
      2      2
      3      3
      4      4
      5      5
      6      6
      7      7
      8      8
      9      9
     10     10
     11     11
     12     12
     13     13
     14     14
     15     15
     16     16
     17     17
     18     18
           1           2          27
      1      1
      2      2
      3      3
      4      4
      5      5
      6      6
      7      7
      8      8
      9      9
     10     10
     11     11
     12     12
     13     13
     14     14
     15     15
     16     16
     17     17
     18     18
           1           2          28
      1      1
      2      2
      3      3
      4      4
      5      5
      6      6
      7      7
      8      8
      9      9
     10     10
     11     11
     12     12
     13     13
     14     14
     15     15
     16     16
     17     17
     18     18
           1           2          29
      1      1
      2      2
      3      3
      4      4
      5      5
      6      6
      7      7
      8      8
      9      9
     10     10
     11     11
     12     12
     13     13
     14     14
     15     15
     16     16
     17     17
     18     18
           1           2          30
      1      1
      2      2
      3      3
      4      4
      5      5
      6      6
      7      7
      8      8
      9      9
     10     10
     11     11
     12     12
     13     13
     14     14
     15     15
     16     16
     17     17
     18     18
           1           2          31
      1      1
      2      2
      3      3
      4      4
      5      5
      6      6
      7      7
      8      8
      9      9
     10     10
     11     11
     12     12
     13     13
     14     14
     15     15
     16     16
     17     17
     18     18
           1           2          32
      1      1
      2      2
      3      3
      4      4
      5      5
      6      6
      7      7
      8      8
      9      9
     10     10
     11     11
     12     12
     13     13
     14     14
     15     15
     16     16
     17     17
     18     18
           1           3           1
      1      1
      2      2
      3      3
      4      4
      5      5
      6      6
      7      7
      8      8
      9      9
     10     10
     11     11
     12     12
     13     13
     14     14
     15     15
     16     16
     17     17
     18     18
           1           3           2
      1      1
      2      2
      3      3
      4      4
      5      5
      6      6
      7      7
      8      8
      9      9
     10     10
     11     11
     12     12
     13     13
     14     14
     15     15
     16     16
     17     17
     18     18
           1           3           3
      1      1
      2      2
      3      3
      4      4
      5      5
      6      6
      7      7
      8      8
      9      9
     10     10
     11     11
     12     12
     13     13
     14     14
     15     15
     16     16
     17     17
     18     18
           1           3           4
      1      1
      2      2
      3      3
      4      4
      5      5
      6      6
      7      7
      8      8
      9      9
     10     10
     11     11
     12     12
     13     13
     14     14
     15     15
     16     16
     17     17
     18     18
           1           3           5
      1      1
      2      2
      3      3
      4      4
      5      5
      6      6
      7      7
      8      8
      9      9
     10     10
     11     11
     12     12
     13     13
     14     14
     15     15
     16     16
     17     17
     18     18
           1           3           6
      1      1
      2      2
      3      3
      4      4
      5      5
      6      6
      7      7
      8      8
      9      9
     10     10
     11     11
     12     12
     13     13
     14     14
     15     15
     16     16
     17     17
     18     18
           1           3           7
      1      1
      2      2
      3      3
      4      4
      5      5
      6      6
      7      7
      8      8
      9      9
     10     10
     11     11
     12     12
     13     13
     14     14
     15     15
     16     16
     17     17
     18     18
           1           3           8
      1      1
      2      2
      3      3
      4      4
      5      5
      6      6
      7      7
      8      8
      9      9
     10     10
     11     11
     12     12
     13     13
     14     14
     15     15
     16     16
     17     17
     18     18
           1           3           9
      1      1
      2      2
      3      3
      4      4
      5      5
      6      6
      7      7
      8      8
      9      9
     10     10
     11     11
     12     12
     13     13
     14     14
     15     15
     16     16
     17     17
     18     18
           1           3          10
      1      1
      2      2
      3      3
      4      4
      5      5
      6      6
      7      7
      8      8
      9      9
     10     10
     11     11
     12     12
     13     13
     14     14
     15     15
     16     16
     17     17
     18     18
           1           3          11
      1      1
      2      2
      3      3
      4      4
      5      5
      6      6
      7      7
      8      8
      9      9
     10     10
     11     11
     12     12
     13     13
     14     14
     15     15
     16     16
     17     17
     18     18
           1           3          12
      1      1
      2      2
      3      3
      4      4
      5      5
      6      6
      7      7
      8      8
      9      9
     10     10
     11     11
     12     12
     13     13
     14     14
     15     15
     16     16
     17     17
     18     18
           1           3          13
      1      1
      2      2
      3      3
      4      4
      5      5
      6      6
      7      7
      8      8
      9      9
     10     10
     11     11
     12     12
     13     13
     14     14
     15     15
     16     16
     17     17
     18     18
           1           3          14
      1      1
      2      2
      3      3
      4      4
      5      5
      6      6
      7      7
      8      8
      9      9
     10     10
     11     11
     12     12
     13     13
     14     14
     15     15
     16     16
     17     17
     18     18
           1           3          15
      1      1
      2      2
      3      3
      4      4
      5      5
      6      6
      7      7
      8      8
      9      9
     10     10
     11     11
     12     12
     13     13
     14     14
     15     15
     16     16
     17     17
     18     18
           1           3          16
      1      1
      2      2
      3      3
      4      4
      5      5
      6      6
      7      7
      8      8
      9      9
     10     10
     11     11
     12     12
     13     13
     14     14
     15     15
     16     16
     17     17
     18     18
           1           3          17
      1      1
      2      2
      3      3
      4      4
      5      5
      6      6
      7      7
      8      8
      9      9
     10     10
     11     11
     12     12
     13     13
     14     14
     15     15
     16     16
     17     17
     18     18
           1           3          18
      1      1
      2      2
      3      3
      4      4
      5      5
      6      6
      7      7
      8      8
      9      9
     10     10
     11     11
     12     12
     13     13
     14     14
     15     15
     16     16
     17     17
     18     18
           1           3          19
      1      1
      2      2
      3      3
      4      4
      5      5
      6      6
      7      7
      8      8
      9      9
     10     10
     11     11
     12     12
     13     13
     14     14
     15     15
     16     16
     17     17
     18     18
           1           3          20
      1      1
      2      2
      3      3
      4      4
      5      5
      6      6
      7      7
      8      8
      9      9
     10     10
     11     11
     12     12
     13     13
     14     14
     15     15
     16     16
     17     17
     18     18
           1           3          21
      1      1
      2      2
      3      3
      4      4
      5      5
      6      6
      7      7
      8      8
      9      9
     10     10
     11     11
     12     12
     13     13
     14     14
     15     15
     16     16
     17     17
     18     18
           1           3          22
      1      1
      2      2
      3      3
      4      4
      5      5
      6      6
      7      7
      8      8
      9      9
     10     10
     11     11
     12     12
     13     13
     14     14
     15     15
     16     16
     17     17
     18     18
           1           3          23
      1      1
      2      2
      3      3
      4      4
      5      5
      6      6
      7      7
      8      8
      9      9
     10     10
     11     11
     12     12
     13     13
     14     14
     15     15
     16     16
     17     17
     18     18
           1           3          24
      1      1
      2      2
      3      3
      4      4
      5      5
      6      6
      7      7
      8      8
      9      9
     10     10
     11     11
     12     12
     13     13
     14     14
     15     15
     16     16
     17     17
     18     18
           1           3          25
      1      1
      2      2
      3      3
      4      4
      5      5
      6      6
      7      7
      8      8
      9      9
     10     10
     11     11
     12     12
     13     13
     14     14
     15     15
     16     16
     17     17
     18     18
           1           3          26
      1      1
      2      2
      3      3
      4      4
      5      5
      6      6
      7      7
      8      8
      9      9
     10     10
     11     11
     12     12
     13     13
     14     14
     15     15
     16     16
     17     17
     18     18
           1           3          27
      1      1
      2      2
      3      3
      4      4
      5      5
      6      6
      7      7
      8      8
      9      9
     10     10
     11     11
     12     12
     13     13
     14     14
     15     15
     16     16
     17     17
     18     18
           1           3          28
      1      1
      2      2
      3      3
      4      4
      5      5
      6      6
      7      7
      8      8
      9      9
     10     10
     11     11
     12     12
     13     13
     14     14
     15     15
     16     16
     17     17
     18     18
           1           3          29
      1      1
      2      2
      3      3
      4      4
      5      5
      6      6
      7      7
      8      8
      9      9
     10     10
     11     11
     12     12
     13     13
     14     14
     15     15
     16     16
     17     17
     18     18
           1           3          30
      1      1
      2      2
      3      3
      4      4
      5      5
      6      6
      7      7
      8      8
      9      9
     10     10
     11     11
     12     12
     13     13
     14     14
     15     15
     16     16
     17     17
     18     18
           1           3          31
      1      1
      2      2
      3      3
      4      4
      5      5
      6      6
      7      7
      8      8
      9      9
     10     10
     11     11
     12     12
     13     13
     14     14
     15     15
     16     16
     17     17
     18     18
           1           3          32
      1      1
      2      2
      3      3
      4      4
      5      5
      6      6
      7      7
      8      8
      9      9
     10     10
     11     11
     12     12
     13     13
     14     14
     15     15
     16     16
     17     17
     18     18
           1           4           1
      1      1
      2      2
      3      3
      4      4
      5      5
      6      6
      7      7
      8      8
      9      9
     10     10
     11     11
     12     12
     13     13
     14     14
     15     15
     16     16
     17     17
     18     18
           1           4           2
      1      1
      2      2
      3      3
      4      4
      5      5
      6      6
      7      7
      8      8
      9      9
     10     10
     11     11
     12     12
     13     13
     14     14
     15     15
     16     16
     17     17
     18     18
           1           4           3
      1      1
      2      2
      3      3
      4      4
      5      5
      6      6
      7      7
      8      8
      9      9
     10     10
     11     11
     12     12
     13     13
     14     14
     15     15
     16     16
     17     17
     18     18
           1           4           4
      1      1
      2      2
      3      3
      4      4
      5      5
      6      6
      7      7
      8      8
      9      9
     10     10
     11     11
     12     12
     13     13
     14     14
     15     15
     16     16
     17     17
     18     18
           1           4           5
      1      1
      2      2
      3      3
      4      4
      5      5
      6      6
      7      7
      8      8
      9      9
     10     10
     11     11
     12     12
     13     13
     14     14
     15     15
     16     16
     17     17
     18     18
           1           4           6
      1      1
      2      2
      3      3
      4      4
      5      5
      6      6
      7      7
      8      8
      9      9
     10     10
     11     11
     12     12
     13     13
     14     14
     15     15
     16     16
     17     17
     18     18
           1           4           7
      1      1
      2      2
      3      3
      4      4
      5      5
      6      6
      7      7
      8      8
      9      9
     10     10
     11     11
     12     12
     13     13
     14     14
     15     15
     16     16
     17     17
     18     18
           1           4           8
      1      1
      2      2
      3      3
      4      4
      5      5
      6      6
      7      7
      8      8
      9      9
     10     10
     11     11
     12     12
     13     13
     14     14
     15     15
     16     16
     17     17
     18     18
           1           4           9
      1      1
      2      2
      3      3
      4      4
      5      5
      6      6
      7      7
      8      8
      9      9
     10     10
     11     11
     12     12
     13     13
     14     14
     15     15
     16     16
     17     17
     18     18
           1           4          10
      1      1
      2      2
      3      3
      4      4
      5      5
      6      6
      7      7
      8      8
      9      9
     10     10
     11     11
     12     12
     13     13
     14     14
     15     15
     16     16
     17     17
     18     18
           1           4          11
      1      1
      2      2
      3      3
      4      4
      5      5
      6      6
      7      7
      8      8
      9      9
     10     10
     11     11
     12     12
     13     13
     14     14
     15     15
     16     16
     17     17
     18     18
           1           4          12
      1      1
      2      2
      3      3
      4      4
      5      5
      6      6
      7      7
      8      8
      9      9
     10     10
     11     11
     12     12
     13     13
     14     14
     15     15
     16     16
     17     17
     18     18
           1           4          13
      1      1
      2      2
      3      3
      4      4
      5      5
      6      6
      7      7
      8      8
      9      9
     10     10
     11     11
     12     12
     13     13
     14     14
     15     15
     16     16
     17     17
     18     18
           1           4          14
      1      1
      2      2
      3      3
      4      4
      5      5
      6      6
      7      7
      8      8
      9      9
     10     10
     11     11
     12     12
     13     13
     14     14
     15     15
     16     16
     17     17
     18     18
           1           4          15
      1      1
      2      2
      3      3
      4      4
      5      5
      6      6
      7      7
      8      8
      9      9
     10     10
     11     11
     12     12
     13     13
     14     14
     15     15
     16     16
     17     17
     18     18
           1           4          16
      1      1
      2      2
      3      3
      4      4
      5      5
      6      6
      7      7
      8      8
      9      9
     10     10
     11     11
     12     12
     13     13
     14     14
     15     15
     16     16
     17     17
     18     18
           1           4          17
      1      1
      2      2
      3      3
      4      4
      5      5
      6      6
      7      7
      8      8
      9      9
     10     10
     11     11
     12     12
     13     13
     14     14
     15     15
     16     16
     17     17
     18     18
           1           4          18
      1      1
      2      2
      3      3
      4      4
      5      5
      6      6
      7      7
      8      8
      9      9
     10     10
     11     11
     12     12
     13     13
     14     14
     15     15
     16     16
     17     17
     18     18
           1           4          19
      1      1
      2      2
      3      3
      4      4
      5      5
      6      6
      7      7
      8      8
      9      9
     10     10
     11     11
     12     12
     13     13
     14     14
     15     15
     16     16
     17     17
     18     18
           1           4          20
      1      1
      2      2
      3      3
      4      4
      5      5
      6      6
      7      7
      8      8
      9      9
     10     10
     11     11
     12     12
     13     13
     14     14
     15     15
     16     16
     17     17
     18     18
           1           4          21
      1      1
      2      2
      3      3
      4      4
      5      5
      6      6
      7      7
      8      8
      9      9
     10     10
     11     11
     12     12
     13     13
     14     14
     15     15
     16     16
     17     17
     18     18
           1           4          22
      1      1
      2      2
      3      3
      4      4
      5      5
      6      6
      7      7
      8      8
      9      9
     10     10
     11     11
     12     12
     13     13
     14     14
     15     15
     16     16
     17     17
     18     18
           1           4          23
      1      1
      2      2
      3      3
      4      4
      5      5
      6      6
      7      7
      8      8
      9      9
     10     10
     11     11
     12     12
     13     13
     14     14
     15     15
     16     16
     17     17
     18     18
           1           4          24
      1      1
      2      2
      3      3
      4      4
      5      5
      6      6
      7      7
      8      8
      9      9
     10     10
     11     11
     12     12
     13     13
     14     14
     15     15
     16     16
     17     17
     18     18
           1           4          25
      1      1
      2      2
      3      3
      4      4
      5      5
      6      6
      7      7
      8      8
      9      9
     10     10
     11     11
     12     12
     13     13
     14     14
     15     15
     16     16
     17     17
     18     18
           1           4          26
      1      1
      2      2
      3      3
      4      4
      5      5
      6      6
      7      7
      8      8
      9      9
     10     10
     11     11
     12     12
     13     13
     14     14
     15     15
     16     16
     17     17
     18     18
           1           4          27
      1      1
      2      2
      3      3
      4      4
      5      5
      6      6
      7      7
      8      8
      9      9
     10     10
     11     11
     12     12
     13     13
     14     14
     15     15
     16     16
     17     17
     18     18
           1           4          28
      1      1
      2      2
      3      3
      4      4
      5      5
      6      6
      7      7
      8      8
      9      9
     10     10
     11     11
     12     12
     13     13
     14     14
     15     15
     16     16
     17     17
     18     18
           1           4          29
      1      1
      2      2
      3      3
      4      4
      5      5
      6      6
      7      7
      8      8
      9      9
     10     10
     11     11
     12     12
     13     13
     14     14
     15     15
     16     16
     17     17
     18     18
           1           4          30
      1      1
      2      2
      3      3
      4      4
      5      5
      6      6
      7      7
      8      8
      9      9
     10     10
     11     11
     12     12
     13     13
     14     14
     15     15
     16     16
     17     17
     18     18
           1           4          31
      1      1
      2      2
      3      3
      4      4
      5      5
      6      6
      7      7
      8      8
      9      9
     10     10
     11     11
     12     12
     13     13
     14     14
     15     15
     16     16
     17     17
     18     18
           1           4          32
      1      1
      2      2
      3      3
      4      4
      5      5
      6      6
      7      7
      8      8
      9      9
     10     10
     11     11
     12     12
     13     13
     14     14
     15     15
     16     16
     17     17
     18     18
           1           5           1
      1      1
      2      2
      3      3
      4      4
      5      5
      6      6
      7      7
      8      8
      9      9
     10     10
     11     11
     12     12
     13     13
     14     14
     15     15
     16     16
     17     17
     18     18
           1           5           2
      1      1
      2      2
      3      3
      4      4
      5      5
      6      6
      7      7
      8      8
      9      9
     10     10
     11     11
     12     12
     13     13
     14     14
     15     15
     16     16
     17     17
     18     18
           1           5           3
      1      1
      2      2
      3      3
      4      4
      5      5
      6      6
      7      7
      8      8
      9      9
     10     10
     11     11
     12     12
     13     13
     14     14
     15     15
     16     16
     17     17
     18     18
           1           5           4
      1      1
      2      2
      3      3
      4      4
      5      5
      6      6
      7      7
      8      8
      9      9
     10     10
     11     11
     12     12
     13     13
     14     14
     15     15
     16     16
     17     17
     18     18
           1           5           5
      1      1
      2      2
      3      3
      4      4
      5      5
      6      6
      7      7
      8      8
      9      9
     10     10
     11     11
     12     12
     13     13
     14     14
     15     15
     16     16
     17     17
     18     18
           1           5           6
      1      1
      2      2
      3      3
      4      4
      5      5
      6      6
      7      7
      8      8
      9      9
     10     10
     11     11
     12     12
     13     13
     14     14
     15     15
     16     16
     17     17
     18     18
           1           5           7
      1      1
      2      2
      3      3
      4      4
      5      5
      6      6
      7      7
      8      8
      9      9
     10     10
     11     11
     12     12
     13     13
     14     14
     15     15
     16     16
     17     17
     18     18
           1           5           8
      1      1
      2      2
      3      3
      4      4
      5      5
      6      6
      7      7
      8      8
      9      9
     10     10
     11     11
     12     12
     13     13
     14     14
     15     15
     16     16
     17     17
     18     18
           1           5           9
      1      1
      2      2
      3      3
      4      4
      5      5
      6      6
      7      7
      8      8
      9      9
     10     10
     11     11
     12     12
     13     13
     14     14
     15     15
     16     16
     17     17
     18     18
           1           5          10
      1      1
      2      2
      3      3
      4      4
      5      5
      6      6
      7      7
      8      8
      9      9
     10     10
     11     11
     12     12
     13     13
     14     14
     15     15
     16     16
     17     17
     18     18
           1           5          11
      1      1
      2      2
      3      3
      4      4
      5      5
      6      6
      7      7
      8      8
      9      9
     10     10
     11     11
     12     12
     13     13
     14     14
     15     15
     16     16
     17     17
     18     18
           1           5          12
      1      1
      2      2
      3      3
      4      4
      5      5
      6      6
      7      7
      8      8
      9      9
     10     10
     11     11
     12     12
     13     13
     14     14
     15     15
     16     16
     17     17
     18     18
           1           5          13
      1      1
      2      2
      3      3
      4      4
      5      5
      6      6
      7      7
      8      8
      9      9
     10     10
     11     11
     12     12
     13     13
     14     14
     15     15
     16     16
     17     17
     18     18
           1           5          14
      1      1
      2      2
      3      3
      4      4
      5      5
      6      6
      7      7
      8      8
      9      9
     10     10
     11     11
     12     12
     13     13
     14     14
     15     15
     16     16
     17     17
     18     18
           1           5          15
      1      1
      2      2
      3      3
      4      4
      5      5
      6      6
      7      7
      8      8
      9      9
     10     10
     11     11
     12     12
     13     13
     14     14
     15     15
     16     16
     17     17
     18     18
           1           5          16
      1      1
      2      2
      3      3
      4      4
      5      5
      6      6
      7      7
      8      8
      9      9
     10     10
     11     11
     12     12
     13     13
     14     14
     15     15
     16     16
     17     17
     18     18
           1           5          17
      1      1
      2      2
      3      3
      4      4
      5      5
      6      6
      7      7
      8      8
      9      9
     10     10
     11     11
     12     12
     13     13
     14     14
     15     15
     16     16
     17     17
     18     18
           1           5          18
      1      1
      2      2
      3      3
      4      4
      5      5
      6      6
      7      7
      8      8
      9      9
     10     10
     11     11
     12     12
     13     13
     14     14
     15     15
     16     16
     17     17
     18     18
           1           5          19
      1      1
      2      2
      3      3
      4      4
      5      5
      6      6
      7      7
      8      8
      9      9
     10     10
     11     11
     12     12
     13     13
     14     14
     15     15
     16     16
     17     17
     18     18
           1           5          20
      1      1
      2      2
      3      3
      4      4
      5      5
      6      6
      7      7
      8      8
      9      9
     10     10
     11     11
     12     12
     13     13
     14     14
     15     15
     16     16
     17     17
     18     18
           1           5          21
      1      1
      2      2
      3      3
      4      4
      5      5
      6      6
      7      7
      8      8
      9      9
     10     10
     11     11
     12     12
     13     13
     14     14
     15     15
     16     16
     17     17
     18     18
           1           5          22
      1      1
      2      2
      3      3
      4      4
      5      5
      6      6
      7      7
      8      8
      9      9
     10     10
     11     11
     12     12
     13     13
     14     14
     15     15
     16     16
     17     17
     18     18
           1           5          23
      1      1
      2      2
      3      3
      4      4
      5      5
      6      6
      7      7
      8      8
      9      9
     10     10
     11     11
     12     12
     13     13
     14     14
     15     15
     16     16
     17     17
     18     18
           1           5          24
      1      1
      2      2
      3      3
      4      4
      5      5
      6      6
      7      7
      8      8
      9      9
     10     10
     11     11
     12     12
     13     13
     14     14
     15     15
     16     16
     17     17
     18     18
           1           5          25
      1      1
      2      2
      3      3
      4      4
      5      5
      6      6
      7      7
      8      8
      9      9
     10     10
     11     11
     12     12
     13     13
     14     14
     15     15
     16     16
     17     17
     18     18
           1           5          26
      1      1
      2      2
      3      3
      4      4
      5      5
      6      6
      7      7
      8      8
      9      9
     10     10
     11     11
     12     12
     13     13
     14     14
     15     15
     16     16
     17     17
     18     18
           1           5          27
      1      1
      2      2
      3      3
      4      4
      5      5
      6      6
      7      7
      8      8
      9      9
     10     10
     11     11
     12     12
     13     13
     14     14
     15     15
     16     16
     17     17
     18     18
           1           5          28
      1      1
      2      2
      3      3
      4      4
      5      5
      6      6
      7      7
      8      8
      9      9
     10     10
     11     11
     12     12
     13     13
     14     14
     15     15
     16     16
     17     17
     18     18
           1           5          29
      1      1
      2      2
      3      3
      4      4
      5      5
      6      6
      7      7
      8      8
      9      9
     10     10
     11     11
     12     12
     13     13
     14     14
     15     15
     16     16
     17     17
     18     18
           1           5          30
      1      1
      2      2
      3      3
      4      4
      5      5
      6      6
      7      7
      8      8
      9      9
     10     10
     11     11
     12     12
     13     13
     14     14
     15     15
     16     16
     17     17
     18     18
           1           5          31
      1      1
      2      2
      3      3
      4      4
      5      5
      6      6
      7      7
      8      8
      9      9
     10     10
     11     11
     12     12
     13     13
     14     14
     15     15
     16     16
     17     17
     18     18
           1           5          32
      1      1
      2      2
      3      3
      4      4
      5      5
      6      6
      7      7
      8      8
      9      9
     10     10
     11     11
     12     12
     13     13
     14     14
     15     15
     16     16
     17     17
     18     18
           1           6           1
      1      1
      2      2
      3      3
      4      4
      5      5
      6      6
      7      7
      8      8
      9      9
     10     10
     11     11
     12     12
     13     13
     14     14
     15     15
     16     16
     17     17
     18     18
           1           6           2
      1      1
      2      2
      3      3
      4      4
      5      5
      6      6
      7      7
      8      8
      9      9
     10     10
     11     11
     12     12
     13     13
     14     14
     15     15
     16     16
     17     17
     18     18
           1           6           3
      1      1
      2      2
      3      3
      4      4
      5      5
      6      6
      7      7
      8      8
      9      9
     10     10
     11     11
     12     12
     13     13
     14     14
     15     15
     16     16
     17     17
     18     18
           1           6           4
      1      1
      2      2
      3      3
      4      4
      5      5
      6      6
      7      7
      8      8
      9      9
     10     10
     11     11
     12     12
     13     13
     14     14
     15     15
     16     16
     17     17
     18     18
           1           6           5
      1      1
      2      2
      3      3
      4      4
      5      5
      6      6
      7      7
      8      8
      9      9
     10     10
     11     11
     12     12
     13     13
     14     14
     15     15
     16     16
     17     17
     18     18
           1           6           6
      1      1
      2      2
      3      3
      4      4
      5      5
      6      6
      7      7
      8      8
      9      9
     10     10
     11     11
     12     12
     13     13
     14     14
     15     15
     16     16
     17     17
     18     18
           1           6           7
      1      1
      2      2
      3      3
      4      4
      5      5
      6      6
      7      7
      8      8
      9      9
     10     10
     11     11
     12     12
     13     13
     14     14
     15     15
     16     16
     17     17
     18     18
           1           6           8
      1      1
      2      2
      3      3
      4      4
      5      5
      6      6
      7      7
      8      8
      9      9
     10     10
     11     11
     12     12
     13     13
     14     14
     15     15
     16     16
     17     17
     18     18
           1           6           9
      1      1
      2      2
      3      3
      4      4
      5      5
      6      6
      7      7
      8      8
      9      9
     10     10
     11     11
     12     12
     13     13
     14     14
     15     15
     16     16
     17     17
     18     18
           1           6          10
      1      1
      2      2
      3      3
      4      4
      5      5
      6      6
      7      7
      8      8
      9      9
     10     10
     11     11
     12     12
     13     13
     14     14
     15     15
     16     16
     17     17
     18     18
           1           6          11
      1      1
      2      2
      3      3
      4      4
      5      5
      6      6
      7      7
      8      8
      9      9
     10     10
     11     11
     12     12
     13     13
     14     14
     15     15
     16     16
     17     17
     18     18
           1           6          12
      1      1
      2      2
      3      3
      4      4
      5      5
      6      6
      7      7
      8      8
      9      9
     10     10
     11     11
     12     12
     13     13
     14     14
     15     15
     16     16
     17     17
     18     18
           1           6          13
      1      1
      2      2
      3      3
      4      4
      5      5
      6      6
      7      7
      8      8
      9      9
     10     10
     11     11
     12     12
     13     13
     14     14
     15     15
     16     16
     17     17
     18     18
           1           6          14
      1      1
      2      2
      3      3
      4      4
      5      5
      6      6
      7      7
      8      8
      9      9
     10     10
     11     11
     12     12
     13     13
     14     14
     15     15
     16     16
     17     17
     18     18
           1           6          15
      1      1
      2      2
      3      3
      4      4
      5      5
      6      6
      7      7
      8      8
      9      9
     10     10
     11     11
     12     12
     13     13
     14     14
     15     15
     16     16
     17     17
     18     18
           1           6          16
      1      1
      2      2
      3      3
      4      4
      5      5
      6      6
      7      7
      8      8
      9      9
     10     10
     11     11
     12     12
     13     13
     14     14
     15     15
     16     16
     17     17
     18     18
           1           6          17
      1      1
      2      2
      3      3
      4      4
      5      5
      6      6
      7      7
      8      8
      9      9
     10     10
     11     11
     12     12
     13     13
     14     14
     15     15
     16     16
     17     17
     18     18
           1           6          18
      1      1
      2      2
      3      3
      4      4
      5      5
      6      6
      7      7
      8      8
      9      9
     10     10
     11     11
     12     12
     13     13
     14     14
     15     15
     16     16
     17     17
     18     18
           1           6          19
      1      1
      2      2
      3      3
      4      4
      5      5
      6      6
      7      7
      8      8
      9      9
     10     10
     11     11
     12     12
     13     13
     14     14
     15     15
     16     16
     17     17
     18     18
           1           6          20
      1      1
      2      2
      3      3
      4      4
      5      5
      6      6
      7      7
      8      8
      9      9
     10     10
     11     11
     12     12
     13     13
     14     14
     15     15
     16     16
     17     17
     18     18
           1           6          21
      1      1
      2      2
      3      3
      4      4
      5      5
      6      6
      7      7
      8      8
      9      9
     10     10
     11     11
     12     12
     13     13
     14     14
     15     15
     16     16
     17     17
     18     18
           1           6          22
      1      1
      2      2
      3      3
      4      4
      5      5
      6      6
      7      7
      8      8
      9      9
     10     10
     11     11
     12     12
     13     13
     14     14
     15     15
     16     16
     17     17
     18     18
           1           6          23
      1      1
      2      2
      3      3
      4      4
      5      5
      6      6
      7      7
      8      8
      9      9
     10     10
     11     11
     12     12
     13     13
     14     14
     15     15
     16     16
     17     17
     18     18
           1           6          24
      1      1
      2      2
      3      3
      4      4
      5      5
      6      6
      7      7
      8      8
      9      9
     10     10
     11     11
     12     12
     13     13
     14     14
     15     15
     16     16
     17     17
     18     18
           1           6          25
      1      1
      2      2
      3      3
      4      4
      5      5
      6      6
      7      7
      8      8
      9      9
     10     10
     11     11
     12     12
     13     13
     14     14
     15     15
     16     16
     17     17
     18     18
           1           6          26
      1      1
      2      2
      3      3
      4      4
      5      5
      6      6
      7      7
      8      8
      9      9
     10     10
     11     11
     12     12
     13     13
     14     14
     15     15
     16     16
     17     17
     18     18
           1           6          27
      1      1
      2      2
      3      3
      4      4
      5      5
      6      6
      7      7
      8      8
      9      9
     10     10
     11     11
     12     12
     13     13
     14     14
     15     15
     16     16
     17     17
     18     18
           1           6          28
      1      1
      2      2
      3      3
      4      4
      5      5
      6      6
      7      7
      8      8
      9      9
     10     10
     11     11
     12     12
     13     13
     14     14
     15     15
     16     16
     17     17
     18     18
           1           6          29
      1      1
      2      2
      3      3
      4      4
      5      5
      6      6
      7      7
      8      8
      9      9
     10     10
     11     11
     12     12
     13     13
     14     14
     15     15
     16     16
     17     17
     18     18
           1           6          30
      1      1
      2      2
      3      3
      4      4
      5      5
      6      6
      7      7
      8      8
      9      9
     10     10
     11     11
     12     12
     13     13
     14     14
     15     15
     16     16
     17     17
     18     18
           1           6          31
      1      1
      2      2
      3      3
      4      4
      5      5
      6      6
      7      7
      8      8
      9      9
     10     10
     11     11
     12     12
     13     13
     14     14
     15     15
     16     16
     17     17
     18     18
           1           6          32
      1      1
      2      2
      3      3
      4      4
      5      5
      6      6
      7      7
      8      8
      9      9
     10     10
     11     11
     12     12
     13     13
     14     14
     15     15
     16     16
     17     17
     18     18
           1           7           1
      1      1
      2      2
      3      3
      4      4
      5      5
      6      6
      7      7
      8      8
      9      9
     10     10
     11     11
     12     12
     13     13
     14     14
     15     15
     16     16
     17     17
     18     18
           1           7           2
      1      1
      2      2
      3      3
      4      4
      5      5
      6      6
      7      7
      8      8
      9      9
     10     10
     11     11
     12     12
     13     13
     14     14
     15     15
     16     16
     17     17
     18     18
           1           7           3
      1      1
      2      2
      3      3
      4      4
      5      5
      6      6
      7      7
      8      8
      9      9
     10     10
     11     11
     12     12
     13     13
     14     14
     15     15
     16     16
     17     17
     18     18
           1           7           4
      1      1
      2      2
      3      3
      4      4
      5      5
      6      6
      7      7
      8      8
      9      9
     10     10
     11     11
     12     12
     13     13
     14     14
     15     15
     16     16
     17     17
     18     18
           1           7           5
      1      1
      2      2
      3      3
      4      4
      5      5
      6      6
      7      7
      8      8
      9      9
     10     10
     11     11
     12     12
     13     13
     14     14
     15     15
     16     16
     17     17
     18     18
           1           7           6
      1      1
      2      2
      3      3
      4      4
      5      5
      6      6
      7      7
      8      8
      9      9
     10     10
     11     11
     12     12
     13     13
     14     14
     15     15
     16     16
     17     17
     18     18
           1           7           7
      1      1
      2      2
      3      3
      4      4
      5      5
      6      6
      7      7
      8      8
      9      9
     10     10
     11     11
     12     12
     13     13
     14     14
     15     15
     16     16
     17     17
     18     18
           1           7           8
      1      1
      2      2
      3      3
      4      4
      5      5
      6      6
      7      7
      8      8
      9      9
     10     10
     11     11
     12     12
     13     13
     14     14
     15     15
     16     16
     17     17
     18     18
           1           7           9
      1      1
      2      2
      3      3
      4      4
      5      5
      6      6
      7      7
      8      8
      9      9
     10     10
     11     11
     12     12
     13     13
     14     14
     15     15
     16     16
     17     17
     18     18
           1           7          10
      1      1
      2      2
      3      3
      4      4
      5      5
      6      6
      7      7
      8      8
      9      9
     10     10
     11     11
     12     12
     13     13
     14     14
     15     15
     16     16
     17     17
     18     18
           1           7          11
      1      1
      2      2
      3      3
      4      4
      5      5
      6      6
      7      7
      8      8
      9      9
     10     10
     11     11
     12     12
     13     13
     14     14
     15     15
     16     16
     17     17
     18     18
           1           7          12
      1      1
      2      2
      3      3
      4      4
      5      5
      6      6
      7      7
      8      8
      9      9
     10     10
     11     11
     12     12
     13     13
     14     14
     15     15
     16     16
     17     17
     18     18
           1           7          13
      1      1
      2      2
      3      3
      4      4
      5      5
      6      6
      7      7
      8      8
      9      9
     10     10
     11     11
     12     12
     13     13
     14     14
     15     15
     16     16
     17     17
     18     18
           1           7          14
      1      1
      2      2
      3      3
      4      4
      5      5
      6      6
      7      7
      8      8
      9      9
     10     10
     11     11
     12     12
     13     13
     14     14
     15     15
     16     16
     17     17
     18     18
           1           7          15
      1      1
      2      2
      3      3
      4      4
      5      5
      6      6
      7      7
      8      8
      9      9
     10     10
     11     11
     12     12
     13     13
     14     14
     15     15
     16     16
     17     17
     18     18
           1           7          16
      1      1
      2      2
      3      3
      4      4
      5      5
      6      6
      7      7
      8      8
      9      9
     10     10
     11     11
     12     12
     13     13
     14     14
     15     15
     16     16
     17     17
     18     18
           1           7          17
      1      1
      2      2
      3      3
      4      4
      5      5
      6      6
      7      7
      8      8
      9      9
     10     10
     11     11
     12     12
     13     13
     14     14
     15     15
     16     16
     17     17
     18     18
           1           7          18
      1      1
      2      2
      3      3
      4      4
      5      5
      6      6
      7      7
      8      8
      9      9
     10     10
     11     11
     12     12
     13     13
     14     14
     15     15
     16     16
     17     17
     18     18
           1           7          19
      1      1
      2      2
      3      3
      4      4
      5      5
      6      6
      7      7
      8      8
      9      9
     10     10
     11     11
     12     12
     13     13
     14     14
     15     15
     16     16
     17     17
     18     18
           1           7          20
      1      1
      2      2
      3      3
      4      4
      5      5
      6      6
      7      7
      8      8
      9      9
     10     10
     11     11
     12     12
     13     13
     14     14
     15     15
     16     16
     17     17
     18     18
           1           7          21
      1      1
      2      2
      3      3
      4      4
      5      5
      6      6
      7      7
      8      8
      9      9
     10     10
     11     11
     12     12
     13     13
     14     14
     15     15
     16     16
     17     17
     18     18
           1           7          22
      1      1
      2      2
      3      3
      4      4
      5      5
      6      6
      7      7
      8      8
      9      9
     10     10
     11     11
     12     12
     13     13
     14     14
     15     15
     16     16
     17     17
     18     18
           1           7          23
      1      1
      2      2
      3      3
      4      4
      5      5
      6      6
      7      7
      8      8
      9      9
     10     10
     11     11
     12     12
     13     13
     14     14
     15     15
     16     16
     17     17
     18     18
           1           7          24
      1      1
      2      2
      3      3
      4      4
      5      5
      6      6
      7      7
      8      8
      9      9
     10     10
     11     11
     12     12
     13     13
     14     14
     15     15
     16     16
     17     17
     18     18
           1           7          25
      1      1
      2      2
      3      3
      4      4
      5      5
      6      6
      7      7
      8      8
      9      9
     10     10
     11     11
     12     12
     13     13
     14     14
     15     15
     16     16
     17     17
     18     18
           1           7          26
      1      1
      2      2
      3      3
      4      4
      5      5
      6      6
      7      7
      8      8
      9      9
     10     10
     11     11
     12     12
     13     13
     14     14
     15     15
     16     16
     17     17
     18     18
           1           7          27
      1      1
      2      2
      3      3
      4      4
      5      5
      6      6
      7      7
      8      8
      9      9
     10     10
     11     11
     12     12
     13     13
     14     14
     15     15
     16     16
     17     17
     18     18
           1           7          28
      1      1
      2      2
      3      3
      4      4
      5      5
      6      6
      7      7
      8      8
      9      9
     10     10
     11     11
     12     12
     13     13
     14     14
     15     15
     16     16
     17     17
     18     18
           1           7          29
      1      1
      2      2
      3      3
      4      4
      5      5
      6      6
      7      7
      8      8
      9      9
     10     10
     11     11
     12     12
     13     13
     14     14
     15     15
     16     16
     17     17
     18     18
           1           7          30
      1      1
      2      2
      3      3
      4      4
      5      5
      6      6
      7      7
      8      8
      9      9
     10     10
     11     11
     12     12
     13     13
     14     14
     15     15
     16     16
     17     17
     18     18
           1           7          31
      1      1
      2      2
      3      3
      4      4
      5      5
      6      6
      7      7
      8      8
      9      9
     10     10
     11     11
     12     12
     13     13
     14     14
     15     15
     16     16
     17     17
     18     18
           1           7          32
      1      1
      2      2
      3      3
      4      4
      5      5
      6      6
      7      7
      8      8
      9      9
     10     10
     11     11
     12     12
     13     13
     14     14
     15     15
     16     16
     17     17
     18     18
           1           8           1
      1      1
      2      2
      3      3
      4      4
      5      5
      6      6
      7      7
      8      8
      9      9
     10     10
     11     11
     12     12
     13     13
     14     14
     15     15
     16     16
     17     17
     18     18
           1           8           2
      1      1
      2      2
      3      3
      4      4
      5      5
      6      6
      7      7
      8      8
      9      9
     10     10
     11     11
     12     12
     13     13
     14     14
     15     15
     16     16
     17     17
     18     18
           1           8           3
      1      1
      2      2
      3      3
      4      4
      5      5
      6      6
      7      7
      8      8
      9      9
     10     10
     11     11
     12     12
     13     13
     14     14
     15     15
     16     16
     17     17
     18     18
           1           8           4
      1      1
      2      2
      3      3
      4      4
      5      5
      6      6
      7      7
      8      8
      9      9
     10     10
     11     11
     12     12
     13     13
     14     14
     15     15
     16     16
     17     17
     18     18
           1           8           5
      1      1
      2      2
      3      3
      4      4
      5      5
      6      6
      7      7
      8      8
      9      9
     10     10
     11     11
     12     12
     13     13
     14     14
     15     15
     16     16
     17     17
     18     18
           1           8           6
      1      1
      2      2
      3      3
      4      4
      5      5
      6      6
      7      7
      8      8
      9      9
     10     10
     11     11
     12     12
     13     13
     14     14
     15     15
     16     16
     17     17
     18     18
           1           8           7
      1      1
      2      2
      3      3
      4      4
      5      5
      6      6
      7      7
      8      8
      9      9
     10     10
     11     11
     12     12
     13     13
     14     14
     15     15
     16     16
     17     17
     18     18
           1           8           8
      1      1
      2      2
      3      3
      4      4
      5      5
      6      6
      7      7
      8      8
      9      9
     10     10
     11     11
     12     12
     13     13
     14     14
     15     15
     16     16
     17     17
     18     18
           1           8           9
      1      1
      2      2
      3      3
      4      4
      5      5
      6      6
      7      7
      8      8
      9      9
     10     10
     11     11
     12     12
     13     13
     14     14
     15     15
     16     16
     17     17
     18     18
           1           8          10
      1      1
      2      2
      3      3
      4      4
      5      5
      6      6
      7      7
      8      8
      9      9
     10     10
     11     11
     12     12
     13     13
     14     14
     15     15
     16     16
     17     17
     18     18
           1           8          11
      1      1
      2      2
      3      3
      4      4
      5      5
      6      6
      7      7
      8      8
      9      9
     10     10
     11     11
     12     12
     13     13
     14     14
     15     15
     16     16
     17     17
     18     18
           1           8          12
      1      1
      2      2
      3      3
      4      4
      5      5
      6      6
      7      7
      8      8
      9      9
     10     10
     11     11
     12     12
     13     13
     14     14
     15     15
     16     16
     17     17
     18     18
           1           8          13
      1      1
      2      2
      3      3
      4      4
      5      5
      6      6
      7      7
      8      8
      9      9
     10     10
     11     11
     12     12
     13     13
     14     14
     15     15
     16     16
     17     17
     18     18
           1           8          14
      1      1
      2      2
      3      3
      4      4
      5      5
      6      6
      7      7
      8      8
      9      9
     10     10
     11     11
     12     12
     13     13
     14     14
     15     15
     16     16
     17     17
     18     18
           1           8          15
      1      1
      2      2
      3      3
      4      4
      5      5
      6      6
      7      7
      8      8
      9      9
     10     10
     11     11
     12     12
     13     13
     14     14
     15     15
     16     16
     17     17
     18     18
           1           8          16
      1      1
      2      2
      3      3
      4      4
      5      5
      6      6
      7      7
      8      8
      9      9
     10     10
     11     11
     12     12
     13     13
     14     14
     15     15
     16     16
     17     17
     18     18
           1           8          17
      1      1
      2      2
      3      3
      4      4
      5      5
      6      6
      7      7
      8      8
      9      9
     10     10
     11     11
     12     12
     13     13
     14     14
     15     15
     16     16
     17     17
     18     18
           1           8          18
      1      1
      2      2
      3      3
      4      4
      5      5
      6      6
      7      7
      8      8
      9      9
     10     10
     11     11
     12     12
     13     13
     14     14
     15     15
     16     16
     17     17
     18     18
           1           8          19
      1      1
      2      2
      3      3
      4      4
      5      5
      6      6
      7      7
      8      8
      9      9
     10     10
     11     11
     12     12
     13     13
     14     14
     15     15
     16     16
     17     17
     18     18
           1           8          20
      1      1
      2      2
      3      3
      4      4
      5      5
      6      6
      7      7
      8      8
      9      9
     10     10
     11     11
     12     12
     13     13
     14     14
     15     15
     16     16
     17     17
     18     18
           1           8          21
      1      1
      2      2
      3      3
      4      4
      5      5
      6      6
      7      7
      8      8
      9      9
     10     10
     11     11
     12     12
     13     13
     14     14
     15     15
     16     16
     17     17
     18     18
           1           8          22
      1      1
      2      2
      3      3
      4      4
      5      5
      6      6
      7      7
      8      8
      9      9
     10     10
     11     11
     12     12
     13     13
     14     14
     15     15
     16     16
     17     17
     18     18
           1           8          23
      1      1
      2      2
      3      3
      4      4
      5      5
      6      6
      7      7
      8      8
      9      9
     10     10
     11     11
     12     12
     13     13
     14     14
     15     15
     16     16
     17     17
     18     18
           1           8          24
      1      1
      2      2
      3      3
      4      4
      5      5
      6      6
      7      7
      8      8
      9      9
     10     10
     11     11
     12     12
     13     13
     14     14
     15     15
     16     16
     17     17
     18     18
           1           8          25
      1      1
      2      2
      3      3
      4      4
      5      5
      6      6
      7      7
      8      8
      9      9
     10     10
     11     11
     12     12
     13     13
     14     14
     15     15
     16     16
     17     17
     18     18
           1           8          26
      1      1
      2      2
      3      3
      4      4
      5      5
      6      6
      7      7
      8      8
      9      9
     10     10
     11     11
     12     12
     13     13
     14     14
     15     15
     16     16
     17     17
     18     18
           1           8          27
      1      1
      2      2
      3      3
      4      4
      5      5
      6      6
      7      7
      8      8
      9      9
     10     10
     11     11
     12     12
     13     13
     14     14
     15     15
     16     16
     17     17
     18     18
           1           8          28
      1      1
      2      2
      3      3
      4      4
      5      5
      6      6
      7      7
      8      8
      9      9
     10     10
     11     11
     12     12
     13     13
     14     14
     15     15
     16     16
     17     17
     18     18
           1           8          29
      1      1
      2      2
      3      3
      4      4
      5      5
      6      6
      7      7
      8      8
      9      9
     10     10
     11     11
     12     12
     13     13
     14     14
     15     15
     16     16
     17     17
     18     18
           1           8          30
      1      1
      2      2
      3      3
      4      4
      5      5
      6      6
      7      7
      8      8
      9      9
     10     10
     11     11
     12     12
     13     13
     14     14
     15     15
     16     16
     17     17
     18     18
           1           8          31
      1      1
      2      2
      3      3
      4      4
      5      5
      6      6
      7      7
      8      8
      9      9
     10     10
     11     11
     12     12
     13     13
     14     14
     15     15
     16     16
     17     17
     18     18
           1           8          32
      1      1
      2      2
      3      3
      4      4
      5      5
      6      6
      7      7
      8      8
      9      9
     10     10
     11     11
     12     12
     13     13
     14     14
     15     15
     16     16
     17     17
     18     18
           1           9           1
      1      1
      2      2
      3      3
      4      4
      5      5
      6      6
      7      7
      8      8
      9      9
     10     10
     11     11
     12     12
     13     13
     14     14
     15     15
     16     16
     17     17
     18     18
           1           9           2
      1      1
      2      2
      3      3
      4      4
      5      5
      6      6
      7      7
      8      8
      9      9
     10     10
     11     11
     12     12
     13     13
     14     14
     15     15
     16     16
     17     17
     18     18
           1           9           3
      1      1
      2      2
      3      3
      4      4
      5      5
      6      6
      7      7
      8      8
      9      9
     10     10
     11     11
     12     12
     13     13
     14     14
     15     15
     16     16
     17     17
     18     18
           1           9           4
      1      1
      2      2
      3      3
      4      4
      5      5
      6      6
      7      7
      8      8
      9      9
     10     10
     11     11
     12     12
     13     13
     14     14
     15     15
     16     16
     17     17
     18     18
           1           9           5
      1      1
      2      2
      3      3
      4      4
      5      5
      6      6
      7      7
      8      8
      9      9
     10     10
     11     11
     12     12
     13     13
     14     14
     15     15
     16     16
     17     17
     18     18
           1           9           6
      1      1
      2      2
      3      3
      4      4
      5      5
      6      6
      7      7
      8      8
      9      9
     10     10
     11     11
     12     12
     13     13
     14     14
     15     15
     16     16
     17     17
     18     18
           1           9           7
      1      1
      2      2
      3      3
      4      4
      5      5
      6      6
      7      7
      8      8
      9      9
     10     10
     11     11
     12     12
     13     13
     14     14
     15     15
     16     16
     17     17
     18     18
           1           9           8
      1      1
      2      2
      3      3
      4      4
      5      5
      6      6
      7      7
      8      8
      9      9
     10     10
     11     11
     12     12
     13     13
     14     14
     15     15
     16     16
     17     17
     18     18
           1           9           9
      1      1
      2      2
      3      3
      4      4
      5      5
      6      6
      7      7
      8      8
      9      9
     10     10
     11     11
     12     12
     13     13
     14     14
     15     15
     16     16
     17     17
     18     18
           1           9          10
      1      1
      2      2
      3      3
      4      4
      5      5
      6      6
      7      7
      8      8
      9      9
     10     10
     11     11
     12     12
     13     13
     14     14
     15     15
     16     16
     17     17
     18     18
           1           9          11
      1      1
      2      2
      3      3
      4      4
      5      5
      6      6
      7      7
      8      8
      9      9
     10     10
     11     11
     12     12
     13     13
     14     14
     15     15
     16     16
     17     17
     18     18
           1           9          12
      1      1
      2      2
      3      3
      4      4
      5      5
      6      6
      7      7
      8      8
      9      9
     10     10
     11     11
     12     12
     13     13
     14     14
     15     15
     16     16
     17     17
     18     18
           1           9          13
      1      1
      2      2
      3      3
      4      4
      5      5
      6      6
      7      7
      8      8
      9      9
     10     10
     11     11
     12     12
     13     13
     14     14
     15     15
     16     16
     17     17
     18     18
           1           9          14
      1      1
      2      2
      3      3
      4      4
      5      5
      6      6
      7      7
      8      8
      9      9
     10     10
     11     11
     12     12
     13     13
     14     14
     15     15
     16     16
     17     17
     18     18
           1           9          15
      1      1
      2      2
      3      3
      4      4
      5      5
      6      6
      7      7
      8      8
      9      9
     10     10
     11     11
     12     12
     13     13
     14     14
     15     15
     16     16
     17     17
     18     18
           1           9          16
      1      1
      2      2
      3      3
      4      4
      5      5
      6      6
      7      7
      8      8
      9      9
     10     10
     11     11
     12     12
     13     13
     14     14
     15     15
     16     16
     17     17
     18     18
           1           9          17
      1      1
      2      2
      3      3
      4      4
      5      5
      6      6
      7      7
      8      8
      9      9
     10     10
     11     11
     12     12
     13     13
     14     14
     15     15
     16     16
     17     17
     18     18
           1           9          18
      1      1
      2      2
      3      3
      4      4
      5      5
      6      6
      7      7
      8      8
      9      9
     10     10
     11     11
     12     12
     13     13
     14     14
     15     15
     16     16
     17     17
     18     18
           1           9          19
      1      1
      2      2
      3      3
      4      4
      5      5
      6      6
      7      7
      8      8
      9      9
     10     10
     11     11
     12     12
     13     13
     14     14
     15     15
     16     16
     17     17
     18     18
           1           9          20
      1      1
      2      2
      3      3
      4      4
      5      5
      6      6
      7      7
      8      8
      9      9
     10     10
     11     11
     12     12
     13     13
     14     14
     15     15
     16     16
     17     17
     18     18
           1           9          21
      1      1
      2      2
      3      3
      4      4
      5      5
      6      6
      7      7
      8      8
      9      9
     10     10
     11     11
     12     12
     13     13
     14     14
     15     15
     16     16
     17     17
     18     18
           1           9          22
      1      1
      2      2
      3      3
      4      4
      5      5
      6      6
      7      7
      8      8
      9      9
     10     10
     11     11
     12     12
     13     13
     14     14
     15     15
     16     16
     17     17
     18     18
           1           9          23
      1      1
      2      2
      3      3
      4      4
      5      5
      6      6
      7      7
      8      8
      9      9
     10     10
     11     11
     12     12
     13     13
     14     14
     15     15
     16     16
     17     17
     18     18
           1           9          24
      1      1
      2      2
      3      3
      4      4
      5      5
      6      6
      7      7
      8      8
      9      9
     10     10
     11     11
     12     12
     13     13
     14     14
     15     15
     16     16
     17     17
     18     18
           1           9          25
      1      1
      2      2
      3      3
      4      4
      5      5
      6      6
      7      7
      8      8
      9      9
     10     10
     11     11
     12     12
     13     13
     14     14
     15     15
     16     16
     17     17
     18     18
           1           9          26
      1      1
      2      2
      3      3
      4      4
      5      5
      6      6
      7      7
      8      8
      9      9
     10     10
     11     11
     12     12
     13     13
     14     14
     15     15
     16     16
     17     17
     18     18
           1           9          27
      1      1
      2      2
      3      3
      4      4
      5      5
      6      6
      7      7
      8      8
      9      9
     10     10
     11     11
     12     12
     13     13
     14     14
     15     15
     16     16
     17     17
     18     18
           1           9          28
      1      1
      2      2
      3      3
      4      4
      5      5
      6      6
      7      7
      8      8
      9      9
     10     10
     11     11
     12     12
     13     13
     14     14
     15     15
     16     16
     17     17
     18     18
           1           9          29
      1      1
      2      2
      3      3
      4      4
      5      5
      6      6
      7      7
      8      8
      9      9
     10     10
     11     11
     12     12
     13     13
     14     14
     15     15
     16     16
     17     17
     18     18
           1           9          30
      1      1
      2      2
      3      3
      4      4
      5      5
      6      6
      7      7
      8      8
      9      9
     10     10
     11     11
     12     12
     13     13
     14     14
     15     15
     16     16
     17     17
     18     18
           1           9          31
      1      1
      2      2
      3      3
      4      4
      5      5
      6      6
      7      7
      8      8
      9      9
     10     10
     11     11
     12     12
     13     13
     14     14
     15     15
     16     16
     17     17
     18     18
           1           9          32
      1      1
      2      2
      3      3
      4      4
      5      5
      6      6
      7      7
      8      8
      9      9
     10     10
     11     11
     12     12
     13     13
     14     14
     15     15
     16     16
     17     17
     18     18
           1          10           1
      1      1
      2      2
      3      3
      4      4
      5      5
      6      6
      7      7
      8      8
      9      9
     10     10
     11     11
     12     12
     13     13
     14     14
     15     15
     16     16
     17     17
     18     18
           1          10           2
      1      1
      2      2
      3      3
      4      4
      5      5
      6      6
      7      7
      8      8
      9      9
     10     10
     11     11
     12     12
     13     13
     14     14
     15     15
     16     16
     17     17
     18     18
           1          10           3
      1      1
      2      2
      3      3
      4      4
      5      5
      6      6
      7      7
      8      8
      9      9
     10     10
     11     11
     12     12
     13     13
     14     14
     15     15
     16     16
     17     17
     18     18
           1          10           4
      1      1
      2      2
      3      3
      4      4
      5      5
      6      6
      7      7
      8      8
      9      9
     10     10
     11     11
     12     12
     13     13
     14     14
     15     15
     16     16
     17     17
     18     18
           1          10           5
      1      1
      2      2
      3      3
      4      4
      5      5
      6      6
      7      7
      8      8
      9      9
     10     10
     11     11
     12     12
     13     13
     14     14
     15     15
     16     16
     17     17
     18     18
           1          10           6
      1      1
      2      2
      3      3
      4      4
      5      5
      6      6
      7      7
      8      8
      9      9
     10     10
     11     11
     12     12
     13     13
     14     14
     15     15
     16     16
     17     17
     18     18
           1          10           7
      1      1
      2      2
      3      3
      4      4
      5      5
      6      6
      7      7
      8      8
      9      9
     10     10
     11     11
     12     12
     13     13
     14     14
     15     15
     16     16
     17     17
     18     18
           1          10           8
      1      1
      2      2
      3      3
      4      4
      5      5
      6      6
      7      7
      8      8
      9      9
     10     10
     11     11
     12     12
     13     13
     14     14
     15     15
     16     16
     17     17
     18     18
           1          10           9
      1      1
      2      2
      3      3
      4      4
      5      5
      6      6
      7      7
      8      8
      9      9
     10     10
     11     11
     12     12
     13     13
     14     14
     15     15
     16     16
     17     17
     18     18
           1          10          10
      1      1
      2      2
      3      3
      4      4
      5      5
      6      6
      7      7
      8      8
      9      9
     10     10
     11     11
     12     12
     13     13
     14     14
     15     15
     16     16
     17     17
     18     18
           1          10          11
      1      1
      2      2
      3      3
      4      4
      5      5
      6      6
      7      7
      8      8
      9      9
     10     10
     11     11
     12     12
     13     13
     14     14
     15     15
     16     16
     17     17
     18     18
           1          10          12
      1      1
      2      2
      3      3
      4      4
      5      5
      6      6
      7      7
      8      8
      9      9
     10     10
     11     11
     12     12
     13     13
     14     14
     15     15
     16     16
     17     17
     18     18
           1          10          13
      1      1
      2      2
      3      3
      4      4
      5      5
      6      6
      7      7
      8      8
      9      9
     10     10
     11     11
     12     12
     13     13
     14     14
     15     15
     16     16
     17     17
     18     18
           1          10          14
      1      1
      2      2
      3      3
      4      4
      5      5
      6      6
      7      7
      8      8
      9      9
     10     10
     11     11
     12     12
     13     13
     14     14
     15     15
     16     16
     17     17
     18     18
           1          10          15
      1      1
      2      2
      3      3
      4      4
      5      5
      6      6
      7      7
      8      8
      9      9
     10     10
     11     11
     12     12
     13     13
     14     14
     15     15
     16     16
     17     17
     18     18
           1          10          16
      1      1
      2      2
      3      3
      4      4
      5      5
      6      6
      7      7
      8      8
      9      9
     10     10
     11     11
     12     12
     13     13
     14     14
     15     15
     16     16
     17     17
     18     18
           1          10          17
      1      1
      2      2
      3      3
      4      4
      5      5
      6      6
      7      7
      8      8
      9      9
     10     10
     11     11
     12     12
     13     13
     14     14
     15     15
     16     16
     17     17
     18     18
           1          10          18
      1      1
      2      2
      3      3
      4      4
      5      5
      6      6
      7      7
      8      8
      9      9
     10     10
     11     11
     12     12
     13     13
     14     14
     15     15
     16     16
     17     17
     18     18
           1          10          19
      1      1
      2      2
      3      3
      4      4
      5      5
      6      6
      7      7
      8      8
      9      9
     10     10
     11     11
     12     12
     13     13
     14     14
     15     15
     16     16
     17     17
     18     18
           1          10          20
      1      1
      2      2
      3      3
      4      4
      5      5
      6      6
      7      7
      8      8
      9      9
     10     10
     11     11
     12     12
     13     13
     14     14
     15     15
     16     16
     17     17
     18     18
           1          10          21
      1      1
      2      2
      3      3
      4      4
      5      5
      6      6
      7      7
      8      8
      9      9
     10     10
     11     11
     12     12
     13     13
     14     14
     15     15
     16     16
     17     17
     18     18
           1          10          22
      1      1
      2      2
      3      3
      4      4
      5      5
      6      6
      7      7
      8      8
      9      9
     10     10
     11     11
     12     12
     13     13
     14     14
     15     15
     16     16
     17     17
     18     18
           1          10          23
      1      1
      2      2
      3      3
      4      4
      5      5
      6      6
      7      7
      8      8
      9      9
     10     10
     11     11
     12     12
     13     13
     14     14
     15     15
     16     16
     17     17
     18     18
           1          10          24
      1      1
      2      2
      3      3
      4      4
      5      5
      6      6
      7      7
      8      8
      9      9
     10     10
     11     11
     12     12
     13     13
     14     14
     15     15
     16     16
     17     17
     18     18
           1          10          25
      1      1
      2      2
      3      3
      4      4
      5      5
      6      6
      7      7
      8      8
      9      9
     10     10
     11     11
     12     12
     13     13
     14     14
     15     15
     16     16
     17     17
     18     18
           1          10          26
      1      1
      2      2
      3      3
      4      4
      5      5
      6      6
      7      7
      8      8
      9      9
     10     10
     11     11
     12     12
     13     13
     14     14
     15     15
     16     16
     17     17
     18     18
           1          10          27
      1      1
      2      2
      3      3
      4      4
      5      5
      6      6
      7      7
      8      8
      9      9
     10     10
     11     11
     12     12
     13     13
     14     14
     15     15
     16     16
     17     17
     18     18
           1          10          28
      1      1
      2      2
      3      3
      4      4
      5      5
      6      6
      7      7
      8      8
      9      9
     10     10
     11     11
     12     12
     13     13
     14     14
     15     15
     16     16
     17     17
     18     18
           1          10          29
      1      1
      2      2
      3      3
      4      4
      5      5
      6      6
      7      7
      8      8
      9      9
     10     10
     11     11
     12     12
     13     13
     14     14
     15     15
     16     16
     17     17
     18     18
           1          10          30
      1      1
      2      2
      3      3
      4      4
      5      5
      6      6
      7      7
      8      8
      9      9
     10     10
     11     11
     12     12
     13     13
     14     14
     15     15
     16     16
     17     17
     18     18
           1          10          31
      1      1
      2      2
      3      3
      4      4
      5      5
      6      6
      7      7
      8      8
      9      9
     10     10
     11     11
     12     12
     13     13
     14     14
     15     15
     16     16
     17     17
     18     18
           1          10          32
      1      1
      2      2
      3      3
      4      4
      5      5
      6      6
      7      7
      8      8
      9      9
     10     10
     11     11
     12     12
     13     13
     14     14
     15     15
     16     16
     17     17
     18     18
           1          11           1
      1      1
      2      2
      3      3
      4      4
      5      5
      6      6
      7      7
      8      8
      9      9
     10     10
     11     11
     12     12
     13     13
     14     14
     15     15
     16     16
     17     17
     18     18
           1          11           2
      1      1
      2      2
      3      3
      4      4
      5      5
      6      6
      7      7
      8      8
      9      9
     10     10
     11     11
     12     12
     13     13
     14     14
     15     15
     16     16
     17     17
     18     18
           1          11           3
      1      1
      2      2
      3      3
      4      4
      5      5
      6      6
      7      7
      8      8
      9      9
     10     10
     11     11
     12     12
     13     13
     14     14
     15     15
     16     16
     17     17
     18     18
           1          11           4
      1      1
      2      2
      3      3
      4      4
      5      5
      6      6
      7      7
      8      8
      9      9
     10     10
     11     11
     12     12
     13     13
     14     14
     15     15
     16     16
     17     17
     18     18
           1          11           5
      1      1
      2      2
      3      3
      4      4
      5      5
      6      6
      7      7
      8      8
      9      9
     10     10
     11     11
     12     12
     13     13
     14     14
     15     15
     16     16
     17     17
     18     18
           1          11           6
      1      1
      2      2
      3      3
      4      4
      5      5
      6      6
      7      7
      8      8
      9      9
     10     10
     11     11
     12     12
     13     13
     14     14
     15     15
     16     16
     17     17
     18     18
           1          11           7
      1      1
      2      2
      3      3
      4      4
      5      5
      6      6
      7      7
      8      8
      9      9
     10     10
     11     11
     12     12
     13     13
     14     14
     15     15
     16     16
     17     17
     18     18
           1          11           8
      1      1
      2      2
      3      3
      4      4
      5      5
      6      6
      7      7
      8      8
      9      9
     10     10
     11     11
     12     12
     13     13
     14     14
     15     15
     16     16
     17     17
     18     18
           1          11           9
      1      1
      2      2
      3      3
      4      4
      5      5
      6      6
      7      7
      8      8
      9      9
     10     10
     11     11
     12     12
     13     13
     14     14
     15     15
     16     16
     17     17
     18     18
           1          11          10
      1      1
      2      2
      3      3
      4      4
      5      5
      6      6
      7      7
      8      8
      9      9
     10     10
     11     11
     12     12
     13     13
     14     14
     15     15
     16     16
     17     17
     18     18
           1          11          11
      1      1
      2      2
      3      3
      4      4
      5      5
      6      6
      7      7
      8      8
      9      9
     10     10
     11     11
     12     12
     13     13
     14     14
     15     15
     16     16
     17     17
     18     18
           1          11          12
      1      1
      2      2
      3      3
      4      4
      5      5
      6      6
      7      7
      8      8
      9      9
     10     10
     11     11
     12     12
     13     13
     14     14
     15     15
     16     16
     17     17
     18     18
           1          11          13
      1      1
      2      2
      3      3
      4      4
      5      5
      6      6
      7      7
      8      8
      9      9
     10     10
     11     11
     12     12
     13     13
     14     14
     15     15
     16     16
     17     17
     18     18
           1          11          14
      1      1
      2      2
      3      3
      4      4
      5      5
      6      6
      7      7
      8      8
      9      9
     10     10
     11     11
     12     12
     13     13
     14     14
     15     15
     16     16
     17     17
     18     18
           1          11          15
      1      1
      2      2
      3      3
      4      4
      5      5
      6      6
      7      7
      8      8
      9      9
     10     10
     11     11
     12     12
     13     13
     14     14
     15     15
     16     16
     17     17
     18     18
           1          11          16
      1      1
      2      2
      3      3
      4      4
      5      5
      6      6
      7      7
      8      8
      9      9
     10     10
     11     11
     12     12
     13     13
     14     14
     15     15
     16     16
     17     17
     18     18
           1          11          17
      1      1
      2      2
      3      3
      4      4
      5      5
      6      6
      7      7
      8      8
      9      9
     10     10
     11     11
     12     12
     13     13
     14     14
     15     15
     16     16
     17     17
     18     18
           1          11          18
      1      1
      2      2
      3      3
      4      4
      5      5
      6      6
      7      7
      8      8
      9      9
     10     10
     11     11
     12     12
     13     13
     14     14
     15     15
     16     16
     17     17
     18     18
           1          11          19
      1      1
      2      2
      3      3
      4      4
      5      5
      6      6
      7      7
      8      8
      9      9
     10     10
     11     11
     12     12
     13     13
     14     14
     15     15
     16     16
     17     17
     18     18
           1          11          20
      1      1
      2      2
      3      3
      4      4
      5      5
      6      6
      7      7
      8      8
      9      9
     10     10
     11     11
     12     12
     13     13
     14     14
     15     15
     16     16
     17     17
     18     18
           1          11          21
      1      1
      2      2
      3      3
      4      4
      5      5
      6      6
      7      7
      8      8
      9      9
     10     10
     11     11
     12     12
     13     13
     14     14
     15     15
     16     16
     17     17
     18     18
           1          11          22
      1      1
      2      2
      3      3
      4      4
      5      5
      6      6
      7      7
      8      8
      9      9
     10     10
     11     11
     12     12
     13     13
     14     14
     15     15
     16     16
     17     17
     18     18
           1          11          23
      1      1
      2      2
      3      3
      4      4
      5      5
      6      6
      7      7
      8      8
      9      9
     10     10
     11     11
     12     12
     13     13
     14     14
     15     15
     16     16
     17     17
     18     18
           1          11          24
      1      1
      2      2
      3      3
      4      4
      5      5
      6      6
      7      7
      8      8
      9      9
     10     10
     11     11
     12     12
     13     13
     14     14
     15     15
     16     16
     17     17
     18     18
           1          11          25
      1      1
      2      2
      3      3
      4      4
      5      5
      6      6
      7      7
      8      8
      9      9
     10     10
     11     11
     12     12
     13     13
     14     14
     15     15
     16     16
     17     17
     18     18
           1          11          26
      1      1
      2      2
      3      3
      4      4
      5      5
      6      6
      7      7
      8      8
      9      9
     10     10
     11     11
     12     12
     13     13
     14     14
     15     15
     16     16
     17     17
     18     18
           1          11          27
      1      1
      2      2
      3      3
      4      4
      5      5
      6      6
      7      7
      8      8
      9      9
     10     10
     11     11
     12     12
     13     13
     14     14
     15     15
     16     16
     17     17
     18     18
           1          11          28
      1      1
      2      2
      3      3
      4      4
      5      5
      6      6
      7      7
      8      8
      9      9
     10     10
     11     11
     12     12
     13     13
     14     14
     15     15
     16     16
     17     17
     18     18
           1          11          29
      1      1
      2      2
      3      3
      4      4
      5      5
      6      6
      7      7
      8      8
      9      9
     10     10
     11     11
     12     12
     13     13
     14     14
     15     15
     16     16
     17     17
     18     18
           1          11          30
      1      1
      2      2
      3      3
      4      4
      5      5
      6      6
      7      7
      8      8
      9      9
     10     10
     11     11
     12     12
     13     13
     14     14
     15     15
     16     16
     17     17
     18     18
           1          11          31
      1      1
      2      2
      3      3
      4      4
      5      5
      6      6
      7      7
      8      8
      9      9
     10     10
     11     11
     12     12
     13     13
     14     14
     15     15
     16     16
     17     17
     18     18
           1          11          32
      1      1
      2      2
      3      3
      4      4
      5      5
      6      6
      7      7
      8      8
      9      9
     10     10
     11     11
     12     12
     13     13
     14     14
     15     15
     16     16
     17     17
     18     18
           1          12           1
      1      1
      2      2
      3      3
      4      4
      5      5
      6      6
      7      7
      8      8
      9      9
     10     10
     11     11
     12     12
     13     13
     14     14
     15     15
     16     16
     17     17
     18     18
           1          12           2
      1      1
      2      2
      3      3
      4      4
      5      5
      6      6
      7      7
      8      8
      9      9
     10     10
     11     11
     12     12
     13     13
     14     14
     15     15
     16     16
     17     17
     18     18
           1          12           3
      1      1
      2      2
      3      3
      4      4
      5      5
      6      6
      7      7
      8      8
      9      9
     10     10
     11     11
     12     12
     13     13
     14     14
     15     15
     16     16
     17     17
     18     18
           1          12           4
      1      1
      2      2
      3      3
      4      4
      5      5
      6      6
      7      7
      8      8
      9      9
     10     10
     11     11
     12     12
     13     13
     14     14
     15     15
     16     16
     17     17
     18     18
           1          12           5
      1      1
      2      2
      3      3
      4      4
      5      5
      6      6
      7      7
      8      8
      9      9
     10     10
     11     11
     12     12
     13     13
     14     14
     15     15
     16     16
     17     17
     18     18
           1          12           6
      1      1
      2      2
      3      3
      4      4
      5      5
      6      6
      7      7
      8      8
      9      9
     10     10
     11     11
     12     12
     13     13
     14     14
     15     15
     16     16
     17     17
     18     18
           1          12           7
      1      1
      2      2
      3      3
      4      4
      5      5
      6      6
      7      7
      8      8
      9      9
     10     10
     11     11
     12     12
     13     13
     14     14
     15     15
     16     16
     17     17
     18     18
           1          12           8
      1      1
      2      2
      3      3
      4      4
      5      5
      6      6
      7      7
      8      8
      9      9
     10     10
     11     11
     12     12
     13     13
     14     14
     15     15
     16     16
     17     17
     18     18
           1          12           9
      1      1
      2      2
      3      3
      4      4
      5      5
      6      6
      7      7
      8      8
      9      9
     10     10
     11     11
     12     12
     13     13
     14     14
     15     15
     16     16
     17     17
     18     18
           1          12          10
      1      1
      2      2
      3      3
      4      4
      5      5
      6      6
      7      7
      8      8
      9      9
     10     10
     11     11
     12     12
     13     13
     14     14
     15     15
     16     16
     17     17
     18     18
           1          12          11
      1      1
      2      2
      3      3
      4      4
      5      5
      6      6
      7      7
      8      8
      9      9
     10     10
     11     11
     12     12
     13     13
     14     14
     15     15
     16     16
     17     17
     18     18
           1          12          12
      1      1
      2      2
      3      3
      4      4
      5      5
      6      6
      7      7
      8      8
      9      9
     10     10
     11     11
     12     12
     13     13
     14     14
     15     15
     16     16
     17     17
     18     18
           1          12          13
      1      1
      2      2
      3      3
      4      4
      5      5
      6      6
      7      7
      8      8
      9      9
     10     10
     11     11
     12     12
     13     13
     14     14
     15     15
     16     16
     17     17
     18     18
           1          12          14
      1      1
      2      2
      3      3
      4      4
      5      5
      6      6
      7      7
      8      8
      9      9
     10     10
     11     11
     12     12
     13     13
     14     14
     15     15
     16     16
     17     17
     18     18
           1          12          15
      1      1
      2      2
      3      3
      4      4
      5      5
      6      6
      7      7
      8      8
      9      9
     10     10
     11     11
     12     12
     13     13
     14     14
     15     15
     16     16
     17     17
     18     18
           1          12          16
      1      1
      2      2
      3      3
      4      4
      5      5
      6      6
      7      7
      8      8
      9      9
     10     10
     11     11
     12     12
     13     13
     14     14
     15     15
     16     16
     17     17
     18     18
           1          12          17
      1      1
      2      2
      3      3
      4      4
      5      5
      6      6
      7      7
      8      8
      9      9
     10     10
     11     11
     12     12
     13     13
     14     14
     15     15
     16     16
     17     17
     18     18
           1          12          18
      1      1
      2      2
      3      3
      4      4
      5      5
      6      6
      7      7
      8      8
      9      9
     10     10
     11     11
     12     12
     13     13
     14     14
     15     15
     16     16
     17     17
     18     18
           1          12          19
      1      1
      2      2
      3      3
      4      4
      5      5
      6      6
      7      7
      8      8
      9      9
     10     10
     11     11
     12     12
     13     13
     14     14
     15     15
     16     16
     17     17
     18     18
           1          12          20
      1      1
      2      2
      3      3
      4      4
      5      5
      6      6
      7      7
      8      8
      9      9
     10     10
     11     11
     12     12
     13     13
     14     14
     15     15
     16     16
     17     17
     18     18
           1          12          21
      1      1
      2      2
      3      3
      4      4
      5      5
      6      6
      7      7
      8      8
      9      9
     10     10
     11     11
     12     12
     13     13
     14     14
     15     15
     16     16
     17     17
     18     18
           1          12          22
      1      1
      2      2
      3      3
      4      4
      5      5
      6      6
      7      7
      8      8
      9      9
     10     10
     11     11
     12     12
     13     13
     14     14
     15     15
     16     16
     17     17
     18     18
           1          12          23
      1      1
      2      2
      3      3
      4      4
      5      5
      6      6
      7      7
      8      8
      9      9
     10     10
     11     11
     12     12
     13     13
     14     14
     15     15
     16     16
     17     17
     18     18
           1          12          24
      1      1
      2      2
      3      3
      4      4
      5      5
      6      6
      7      7
      8      8
      9      9
     10     10
     11     11
     12     12
     13     13
     14     14
     15     15
     16     16
     17     17
     18     18
           1          12          25
      1      1
      2      2
      3      3
      4      4
      5      5
      6      6
      7      7
      8      8
      9      9
     10     10
     11     11
     12     12
     13     13
     14     14
     15     15
     16     16
     17     17
     18     18
           1          12          26
      1      1
      2      2
      3      3
      4      4
      5      5
      6      6
      7      7
      8      8
      9      9
     10     10
     11     11
     12     12
     13     13
     14     14
     15     15
     16     16
     17     17
     18     18
           1          12          27
      1      1
      2      2
      3      3
      4      4
      5      5
      6      6
      7      7
      8      8
      9      9
     10     10
     11     11
     12     12
     13     13
     14     14
     15     15
     16     16
     17     17
     18     18
           1          12          28
      1      1
      2      2
      3      3
      4      4
      5      5
      6      6
      7      7
      8      8
      9      9
     10     10
     11     11
     12     12
     13     13
     14     14
     15     15
     16     16
     17     17
     18     18
           1          12          29
      1      1
      2      2
      3      3
      4      4
      5      5
      6      6
      7      7
      8      8
      9      9
     10     10
     11     11
     12     12
     13     13
     14     14
     15     15
     16     16
     17     17
     18     18
           1          12          30
      1      1
      2      2
      3      3
      4      4
      5      5
      6      6
      7      7
      8      8
      9      9
     10     10
     11     11
     12     12
     13     13
     14     14
     15     15
     16     16
     17     17
     18     18
           1          12          31
      1      1
      2      2
      3      3
      4      4
      5      5
      6      6
      7      7
      8      8
      9      9
     10     10
     11     11
     12     12
     13     13
     14     14
     15     15
     16     16
     17     17
     18     18
           1          12          32
      1      1
      2      2
      3      3
      4      4
      5      5
      6      6
      7      7
      8      8
      9      9
     10     10
     11     11
     12     12
     13     13
     14     14
     15     15
     16     16
     17     17
     18     18
           1          13           1
      1      1
      2      2
      3      3
      4      4
      5      5
      6      6
      7      7
      8      8
      9      9
     10     10
     11     11
     12     12
     13     13
     14     14
     15     15
     16     16
     17     17
     18     18
           1          13           2
      1      1
      2      2
      3      3
      4      4
      5      5
      6      6
      7      7
      8      8
      9      9
     10     10
     11     11
     12     12
     13     13
     14     14
     15     15
     16     16
     17     17
     18     18
           1          13           3
      1      1
      2      2
      3      3
      4      4
      5      5
      6      6
      7      7
      8      8
      9      9
     10     10
     11     11
     12     12
     13     13
     14     14
     15     15
     16     16
     17     17
     18     18
           1          13           4
      1      1
      2      2
      3      3
      4      4
      5      5
      6      6
      7      7
      8      8
      9      9
     10     10
     11     11
     12     12
     13     13
     14     14
     15     15
     16     16
     17     17
     18     18
           1          13           5
      1      1
      2      2
      3      3
      4      4
      5      5
      6      6
      7      7
      8      8
      9      9
     10     10
     11     11
     12     12
     13     13
     14     14
     15     15
     16     16
     17     17
     18     18
           1          13           6
      1      1
      2      2
      3      3
      4      4
      5      5
      6      6
      7      7
      8      8
      9      9
     10     10
     11     11
     12     12
     13     13
     14     14
     15     15
     16     16
     17     17
     18     18
           1          13           7
      1      1
      2      2
      3      3
      4      4
      5      5
      6      6
      7      7
      8      8
      9      9
     10     10
     11     11
     12     12
     13     13
     14     14
     15     15
     16     16
     17     17
     18     18
           1          13           8
      1      1
      2      2
      3      3
      4      4
      5      5
      6      6
      7      7
      8      8
      9      9
     10     10
     11     11
     12     12
     13     13
     14     14
     15     15
     16     16
     17     17
     18     18
           1          13           9
      1      1
      2      2
      3      3
      4      4
      5      5
      6      6
      7      7
      8      8
      9      9
     10     10
     11     11
     12     12
     13     13
     14     14
     15     15
     16     16
     17     17
     18     18
           1          13          10
      1      1
      2      2
      3      3
      4      4
      5      5
      6      6
      7      7
      8      8
      9      9
     10     10
     11     11
     12     12
     13     13
     14     14
     15     15
     16     16
     17     17
     18     18
           1          13          11
      1      1
      2      2
      3      3
      4      4
      5      5
      6      6
      7      7
      8      8
      9      9
     10     10
     11     11
     12     12
     13     13
     14     14
     15     15
     16     16
     17     17
     18     18
           1          13          12
      1      1
      2      2
      3      3
      4      4
      5      5
      6      6
      7      7
      8      8
      9      9
     10     10
     11     11
     12     12
     13     13
     14     14
     15     15
     16     16
     17     17
     18     18
           1          13          13
      1      1
      2      2
      3      3
      4      4
      5      5
      6      6
      7      7
      8      8
      9      9
     10     10
     11     11
     12     12
     13     13
     14     14
     15     15
     16     16
     17     17
     18     18
           1          13          14
      1      1
      2      2
      3      3
      4      4
      5      5
      6      6
      7      7
      8      8
      9      9
     10     10
     11     11
     12     12
     13     13
     14     14
     15     15
     16     16
     17     17
     18     18
           1          13          15
      1      1
      2      2
      3      3
      4      4
      5      5
      6      6
      7      7
      8      8
      9      9
     10     10
     11     11
     12     12
     13     13
     14     14
     15     15
     16     16
     17     17
     18     18
           1          13          16
      1      1
      2      2
      3      3
      4      4
      5      5
      6      6
      7      7
      8      8
      9      9
     10     10
     11     11
     12     12
     13     13
     14     14
     15     15
     16     16
     17     17
     18     18
           1          13          17
      1      1
      2      2
      3      3
      4      4
      5      5
      6      6
      7      7
      8      8
      9      9
     10     10
     11     11
     12     12
     13     13
     14     14
     15     15
     16     16
     17     17
     18     18
           1          13          18
      1      1
      2      2
      3      3
      4      4
      5      5
      6      6
      7      7
      8      8
      9      9
     10     10
     11     11
     12     12
     13     13
     14     14
     15     15
     16     16
     17     17
     18     18
           1          13          19
      1      1
      2      2
      3      3
      4      4
      5      5
      6      6
      7      7
      8      8
      9      9
     10     10
     11     11
     12     12
     13     13
     14     14
     15     15
     16     16
     17     17
     18     18
           1          13          20
      1      1
      2      2
      3      3
      4      4
      5      5
      6      6
      7      7
      8      8
      9      9
     10     10
     11     11
     12     12
     13     13
     14     14
     15     15
     16     16
     17     17
     18     18
           1          13          21
      1      1
      2      2
      3      3
      4      4
      5      5
      6      6
      7      7
      8      8
      9      9
     10     10
     11     11
     12     12
     13     13
     14     14
     15     15
     16     16
     17     17
     18     18
           1          13          22
      1      1
      2      2
      3      3
      4      4
      5      5
      6      6
      7      7
      8      8
      9      9
     10     10
     11     11
     12     12
     13     13
     14     14
     15     15
     16     16
     17     17
     18     18
           1          13          23
      1      1
      2      2
      3      3
      4      4
      5      5
      6      6
      7      7
      8      8
      9      9
     10     10
     11     11
     12     12
     13     13
     14     14
     15     15
     16     16
     17     17
     18     18
           1          13          24
      1      1
      2      2
      3      3
      4      4
      5      5
      6      6
      7      7
      8      8
      9      9
     10     10
     11     11
     12     12
     13     13
     14     14
     15     15
     16     16
     17     17
     18     18
           1          13          25
      1      1
      2      2
      3      3
      4      4
      5      5
      6      6
      7      7
      8      8
      9      9
     10     10
     11     11
     12     12
     13     13
     14     14
     15     15
     16     16
     17     17
     18     18
           1          13          26
      1      1
      2      2
      3      3
      4      4
      5      5
      6      6
      7      7
      8      8
      9      9
     10     10
     11     11
     12     12
     13     13
     14     14
     15     15
     16     16
     17     17
     18     18
           1          13          27
      1      1
      2      2
      3      3
      4      4
      5      5
      6      6
      7      7
      8      8
      9      9
     10     10
     11     11
     12     12
     13     13
     14     14
     15     15
     16     16
     17     17
     18     18
           1          13          28
      1      1
      2      2
      3      3
      4      4
      5      5
      6      6
      7      7
      8      8
      9      9
     10     10
     11     11
     12     12
     13     13
     14     14
     15     15
     16     16
     17     17
     18     18
           1          13          29
      1      1
      2      2
      3      3
      4      4
      5      5
      6      6
      7      7
      8      8
      9      9
     10     10
     11     11
     12     12
     13     13
     14     14
     15     15
     16     16
     17     17
     18     18
           1          13          30
      1      1
      2      2
      3      3
      4      4
      5      5
      6      6
      7      7
      8      8
      9      9
     10     10
     11     11
     12     12
     13     13
     14     14
     15     15
     16     16
     17     17
     18     18
           1          13          31
      1      1
      2      2
      3      3
      4      4
      5      5
      6      6
      7      7
      8      8
      9      9
     10     10
     11     11
     12     12
     13     13
     14     14
     15     15
     16     16
     17     17
     18     18
           1          13          32
      1      1
      2      2
      3      3
      4      4
      5      5
      6      6
      7      7
      8      8
      9      9
     10     10
     11     11
     12     12
     13     13
     14     14
     15     15
     16     16
     17     17
     18     18
           1          14           1
      1      1
      2      2
      3      3
      4      4
      5      5
      6      6
      7      7
      8      8
      9      9
     10     10
     11     11
     12     12
     13     13
     14     14
     15     15
     16     16
     17     17
     18     18
           1          14           2
      1      1
      2      2
      3      3
      4      4
      5      5
      6      6
      7      7
      8      8
      9      9
     10     10
     11     11
     12     12
     13     13
     14     14
     15     15
     16     16
     17     17
     18     18
           1          14           3
      1      1
      2      2
      3      3
      4      4
      5      5
      6      6
      7      7
      8      8
      9      9
     10     10
     11     11
     12     12
     13     13
     14     14
     15     15
     16     16
     17     17
     18     18
           1          14           4
      1      1
      2      2
      3      3
      4      4
      5      5
      6      6
      7      7
      8      8
      9      9
     10     10
     11     11
     12     12
     13     13
     14     14
     15     15
     16     16
     17     17
     18     18
           1          14           5
      1      1
      2      2
      3      3
      4      4
      5      5
      6      6
      7      7
      8      8
      9      9
     10     10
     11     11
     12     12
     13     13
     14     14
     15     15
     16     16
     17     17
     18     18
           1          14           6
      1      1
      2      2
      3      3
      4      4
      5      5
      6      6
      7      7
      8      8
      9      9
     10     10
     11     11
     12     12
     13     13
     14     14
     15     15
     16     16
     17     17
     18     18
           1          14           7
      1      1
      2      2
      3      3
      4      4
      5      5
      6      6
      7      7
      8      8
      9      9
     10     10
     11     11
     12     12
     13     13
     14     14
     15     15
     16     16
     17     17
     18     18
           1          14           8
      1      1
      2      2
      3      3
      4      4
      5      5
      6      6
      7      7
      8      8
      9      9
     10     10
     11     11
     12     12
     13     13
     14     14
     15     15
     16     16
     17     17
     18     18
           1          14           9
      1      1
      2      2
      3      3
      4      4
      5      5
      6      6
      7      7
      8      8
      9      9
     10     10
     11     11
     12     12
     13     13
     14     14
     15     15
     16     16
     17     17
     18     18
           1          14          10
      1      1
      2      2
      3      3
      4      4
      5      5
      6      6
      7      7
      8      8
      9      9
     10     10
     11     11
     12     12
     13     13
     14     14
     15     15
     16     16
     17     17
     18     18
           1          14          11
      1      1
      2      2
      3      3
      4      4
      5      5
      6      6
      7      7
      8      8
      9      9
     10     10
     11     11
     12     12
     13     13
     14     14
     15     15
     16     16
     17     17
     18     18
           1          14          12
      1      1
      2      2
      3      3
      4      4
      5      5
      6      6
      7      7
      8      8
      9      9
     10     10
     11     11
     12     12
     13     13
     14     14
     15     15
     16     16
     17     17
     18     18
           1          14          13
      1      1
      2      2
      3      3
      4      4
      5      5
      6      6
      7      7
      8      8
      9      9
     10     10
     11     11
     12     12
     13     13
     14     14
     15     15
     16     16
     17     17
     18     18
           1          14          14
      1      1
      2      2
      3      3
      4      4
      5      5
      6      6
      7      7
      8      8
      9      9
     10     10
     11     11
     12     12
     13     13
     14     14
     15     15
     16     16
     17     17
     18     18
           1          14          15
      1      1
      2      2
      3      3
      4      4
      5      5
      6      6
      7      7
      8      8
      9      9
     10     10
     11     11
     12     12
     13     13
     14     14
     15     15
     16     16
     17     17
     18     18
           1          14          16
      1      1
      2      2
      3      3
      4      4
      5      5
      6      6
      7      7
      8      8
      9      9
     10     10
     11     11
     12     12
     13     13
     14     14
     15     15
     16     16
     17     17
     18     18
           1          14          17
      1      1
      2      2
      3      3
      4      4
      5      5
      6      6
      7      7
      8      8
      9      9
     10     10
     11     11
     12     12
     13     13
     14     14
     15     15
     16     16
     17     17
     18     18
           1          14          18
      1      1
      2      2
      3      3
      4      4
      5      5
      6      6
      7      7
      8      8
      9      9
     10     10
     11     11
     12     12
     13     13
     14     14
     15     15
     16     16
     17     17
     18     18
           1          14          19
      1      1
      2      2
      3      3
      4      4
      5      5
      6      6
      7      7
      8      8
      9      9
     10     10
     11     11
     12     12
     13     13
     14     14
     15     15
     16     16
     17     17
     18     18
           1          14          20
      1      1
      2      2
      3      3
      4      4
      5      5
      6      6
      7      7
      8      8
      9      9
     10     10
     11     11
     12     12
     13     13
     14     14
     15     15
     16     16
     17     17
     18     18
           1          14          21
      1      1
      2      2
      3      3
      4      4
      5      5
      6      6
      7      7
      8      8
      9      9
     10     10
     11     11
     12     12
     13     13
     14     14
     15     15
     16     16
     17     17
     18     18
           1          14          22
      1      1
      2      2
      3      3
      4      4
      5      5
      6      6
      7      7
      8      8
      9      9
     10     10
     11     11
     12     12
     13     13
     14     14
     15     15
     16     16
     17     17
     18     18
           1          14          23
      1      1
      2      2
      3      3
      4      4
      5      5
      6      6
      7      7
      8      8
      9      9
     10     10
     11     11
     12     12
     13     13
     14     14
     15     15
     16     16
     17     17
     18     18
           1          14          24
      1      1
      2      2
      3      3
      4      4
      5      5
      6      6
      7      7
      8      8
      9      9
     10     10
     11     11
     12     12
     13     13
     14     14
     15     15
     16     16
     17     17
     18     18
           1          14          25
      1      1
      2      2
      3      3
      4      4
      5      5
      6      6
      7      7
      8      8
      9      9
     10     10
     11     11
     12     12
     13     13
     14     14
     15     15
     16     16
     17     17
     18     18
           1          14          26
      1      1
      2      2
      3      3
      4      4
      5      5
      6      6
      7      7
      8      8
      9      9
     10     10
     11     11
     12     12
     13     13
     14     14
     15     15
     16     16
     17     17
     18     18
           1          14          27
      1      1
      2      2
      3      3
      4      4
      5      5
      6      6
      7      7
      8      8
      9      9
     10     10
     11     11
     12     12
     13     13
     14     14
     15     15
     16     16
     17     17
     18     18
           1          14          28
      1      1
      2      2
      3      3
      4      4
      5      5
      6      6
      7      7
      8      8
      9      9
     10     10
     11     11
     12     12
     13     13
     14     14
     15     15
     16     16
     17     17
     18     18
           1          14          29
      1      1
      2      2
      3      3
      4      4
      5      5
      6      6
      7      7
      8      8
      9      9
     10     10
     11     11
     12     12
     13     13
     14     14
     15     15
     16     16
     17     17
     18     18
           1          14          30
      1      1
      2      2
      3      3
      4      4
      5      5
      6      6
      7      7
      8      8
      9      9
     10     10
     11     11
     12     12
     13     13
     14     14
     15     15
     16     16
     17     17
     18     18
           1          14          31
      1      1
      2      2
      3      3
      4      4
      5      5
      6      6
      7      7
      8      8
      9      9
     10     10
     11     11
     12     12
     13     13
     14     14
     15     15
     16     16
     17     17
     18     18
           1          14          32
      1      1
      2      2
      3      3
      4      4
      5      5
      6      6
      7      7
      8      8
      9      9
     10     10
     11     11
     12     12
     13     13
     14     14
     15     15
     16     16
     17     17
     18     18
           1          15           1
      1      1
      2      2
      3      3
      4      4
      5      5
      6      6
      7      7
      8      8
      9      9
     10     10
     11     11
     12     12
     13     13
     14     14
     15     15
     16     16
     17     17
     18     18
           1          15           2
      1      1
      2      2
      3      3
      4      4
      5      5
      6      6
      7      7
      8      8
      9      9
     10     10
     11     11
     12     12
     13     13
     14     14
     15     15
     16     16
     17     17
     18     18
           1          15           3
      1      1
      2      2
      3      3
      4      4
      5      5
      6      6
      7      7
      8      8
      9      9
     10     10
     11     11
     12     12
     13     13
     14     14
     15     15
     16     16
     17     17
     18     18
           1          15           4
      1      1
      2      2
      3      3
      4      4
      5      5
      6      6
      7      7
      8      8
      9      9
     10     10
     11     11
     12     12
     13     13
     14     14
     15     15
     16     16
     17     17
     18     18
           1          15           5
      1      1
      2      2
      3      3
      4      4
      5      5
      6      6
      7      7
      8      8
      9      9
     10     10
     11     11
     12     12
     13     13
     14     14
     15     15
     16     16
     17     17
     18     18
           1          15           6
      1      1
      2      2
      3      3
      4      4
      5      5
      6      6
      7      7
      8      8
      9      9
     10     10
     11     11
     12     12
     13     13
     14     14
     15     15
     16     16
     17     17
     18     18
           1          15           7
      1      1
      2      2
      3      3
      4      4
      5      5
      6      6
      7      7
      8      8
      9      9
     10     10
     11     11
     12     12
     13     13
     14     14
     15     15
     16     16
     17     17
     18     18
           1          15           8
      1      1
      2      2
      3      3
      4      4
      5      5
      6      6
      7      7
      8      8
      9      9
     10     10
     11     11
     12     12
     13     13
     14     14
     15     15
     16     16
     17     17
     18     18
           1          15           9
      1      1
      2      2
      3      3
      4      4
      5      5
      6      6
      7      7
      8      8
      9      9
     10     10
     11     11
     12     12
     13     13
     14     14
     15     15
     16     16
     17     17
     18     18
           1          15          10
      1      1
      2      2
      3      3
      4      4
      5      5
      6      6
      7      7
      8      8
      9      9
     10     10
     11     11
     12     12
     13     13
     14     14
     15     15
     16     16
     17     17
     18     18
           1          15          11
      1      1
      2      2
      3      3
      4      4
      5      5
      6      6
      7      7
      8      8
      9      9
     10     10
     11     11
     12     12
     13     13
     14     14
     15     15
     16     16
     17     17
     18     18
           1          15          12
      1      1
      2      2
      3      3
      4      4
      5      5
      6      6
      7      7
      8      8
      9      9
     10     10
     11     11
     12     12
     13     13
     14     14
     15     15
     16     16
     17     17
     18     18
           1          15          13
      1      1
      2      2
      3      3
      4      4
      5      5
      6      6
      7      7
      8      8
      9      9
     10     10
     11     11
     12     12
     13     13
     14     14
     15     15
     16     16
     17     17
     18     18
           1          15          14
      1      1
      2      2
      3      3
      4      4
      5      5
      6      6
      7      7
      8      8
      9      9
     10     10
     11     11
     12     12
     13     13
     14     14
     15     15
     16     16
     17     17
     18     18
           1          15          15
      1      1
      2      2
      3      3
      4      4
      5      5
      6      6
      7      7
      8      8
      9      9
     10     10
     11     11
     12     12
     13     13
     14     14
     15     15
     16     16
     17     17
     18     18
           1          15          16
      1      1
      2      2
      3      3
      4      4
      5      5
      6      6
      7      7
      8      8
      9      9
     10     10
     11     11
     12     12
     13     13
     14     14
     15     15
     16     16
     17     17
     18     18
           1          15          17
      1      1
      2      2
      3      3
      4      4
      5      5
      6      6
      7      7
      8      8
      9      9
     10     10
     11     11
     12     12
     13     13
     14     14
     15     15
     16     16
     17     17
     18     18
           1          15          18
      1      1
      2      2
      3      3
      4      4
      5      5
      6      6
      7      7
      8      8
      9      9
     10     10
     11     11
     12     12
     13     13
     14     14
     15     15
     16     16
     17     17
     18     18
           1          15          19
      1      1
      2      2
      3      3
      4      4
      5      5
      6      6
      7      7
      8      8
      9      9
     10     10
     11     11
     12     12
     13     13
     14     14
     15     15
     16     16
     17     17
     18     18
           1          15          20
      1      1
      2      2
      3      3
      4      4
      5      5
      6      6
      7      7
      8      8
      9      9
     10     10
     11     11
     12     12
     13     13
     14     14
     15     15
     16     16
     17     17
     18     18
           1          15          21
      1      1
      2      2
      3      3
      4      4
      5      5
      6      6
      7      7
      8      8
      9      9
     10     10
     11     11
     12     12
     13     13
     14     14
     15     15
     16     16
     17     17
     18     18
           1          15          22
      1      1
      2      2
      3      3
      4      4
      5      5
      6      6
      7      7
      8      8
      9      9
     10     10
     11     11
     12     12
     13     13
     14     14
     15     15
     16     16
     17     17
     18     18
           1          15          23
      1      1
      2      2
      3      3
      4      4
      5      5
      6      6
      7      7
      8      8
      9      9
     10     10
     11     11
     12     12
     13     13
     14     14
     15     15
     16     16
     17     17
     18     18
           1          15          24
      1      1
      2      2
      3      3
      4      4
      5      5
      6      6
      7      7
      8      8
      9      9
     10     10
     11     11
     12     12
     13     13
     14     14
     15     15
     16     16
     17     17
     18     18
           1          15          25
      1      1
      2      2
      3      3
      4      4
      5      5
      6      6
      7      7
      8      8
      9      9
     10     10
     11     11
     12     12
     13     13
     14     14
     15     15
     16     16
     17     17
     18     18
           1          15          26
      1      1
      2      2
      3      3
      4      4
      5      5
      6      6
      7      7
      8      8
      9      9
     10     10
     11     11
     12     12
     13     13
     14     14
     15     15
     16     16
     17     17
     18     18
           1          15          27
      1      1
      2      2
      3      3
      4      4
      5      5
      6      6
      7      7
      8      8
      9      9
     10     10
     11     11
     12     12
     13     13
     14     14
     15     15
     16     16
     17     17
     18     18
           1          15          28
      1      1
      2      2
      3      3
      4      4
      5      5
      6      6
      7      7
      8      8
      9      9
     10     10
     11     11
     12     12
     13     13
     14     14
     15     15
     16     16
     17     17
     18     18
           1          15          29
      1      1
      2      2
      3      3
      4      4
      5      5
      6      6
      7      7
      8      8
      9      9
     10     10
     11     11
     12     12
     13     13
     14     14
     15     15
     16     16
     17     17
     18     18
           1          15          30
      1      1
      2      2
      3      3
      4      4
      5      5
      6      6
      7      7
      8      8
      9      9
     10     10
     11     11
     12     12
     13     13
     14     14
     15     15
     16     16
     17     17
     18     18
           1          15          31
      1      1
      2      2
      3      3
      4      4
      5      5
      6      6
      7      7
      8      8
      9      9
     10     10
     11     11
     12     12
     13     13
     14     14
     15     15
     16     16
     17     17
     18     18
           1          15          32
      1      1
      2      2
      3      3
      4      4
      5      5
      6      6
      7      7
      8      8
      9      9
     10     10
     11     11
     12     12
     13     13
     14     14
     15     15
     16     16
     17     17
     18     18
           1          16           1
      1      1
      2      2
      3      3
      4      4
      5      5
      6      6
      7      7
      8      8
      9      9
     10     10
     11     11
     12     12
     13     13
     14     14
     15     15
     16     16
     17     17
     18     18
           1          16           2
      1      1
      2      2
      3      3
      4      4
      5      5
      6      6
      7      7
      8      8
      9      9
     10     10
     11     11
     12     12
     13     13
     14     14
     15     15
     16     16
     17     17
     18     18
           1          16           3
      1      1
      2      2
      3      3
      4      4
      5      5
      6      6
      7      7
      8      8
      9      9
     10     10
     11     11
     12     12
     13     13
     14     14
     15     15
     16     16
     17     17
     18     18
           1          16           4
      1      1
      2      2
      3      3
      4      4
      5      5
      6      6
      7      7
      8      8
      9      9
     10     10
     11     11
     12     12
     13     13
     14     14
     15     15
     16     16
     17     17
     18     18
           1          16           5
      1      1
      2      2
      3      3
      4      4
      5      5
      6      6
      7      7
      8      8
      9      9
     10     10
     11     11
     12     12
     13     13
     14     14
     15     15
     16     16
     17     17
     18     18
           1          16           6
      1      1
      2      2
      3      3
      4      4
      5      5
      6      6
      7      7
      8      8
      9      9
     10     10
     11     11
     12     12
     13     13
     14     14
     15     15
     16     16
     17     17
     18     18
           1          16           7
      1      1
      2      2
      3      3
      4      4
      5      5
      6      6
      7      7
      8      8
      9      9
     10     10
     11     11
     12     12
     13     13
     14     14
     15     15
     16     16
     17     17
     18     18
           1          16           8
      1      1
      2      2
      3      3
      4      4
      5      5
      6      6
      7      7
      8      8
      9      9
     10     10
     11     11
     12     12
     13     13
     14     14
     15     15
     16     16
     17     17
     18     18
           1          16           9
      1      1
      2      2
      3      3
      4      4
      5      5
      6      6
      7      7
      8      8
      9      9
     10     10
     11     11
     12     12
     13     13
     14     14
     15     15
     16     16
     17     17
     18     18
           1          16          10
      1      1
      2      2
      3      3
      4      4
      5      5
      6      6
      7      7
      8      8
      9      9
     10     10
     11     11
     12     12
     13     13
     14     14
     15     15
     16     16
     17     17
     18     18
           1          16          11
      1      1
      2      2
      3      3
      4      4
      5      5
      6      6
      7      7
      8      8
      9      9
     10     10
     11     11
     12     12
     13     13
     14     14
     15     15
     16     16
     17     17
     18     18
           1          16          12
      1      1
      2      2
      3      3
      4      4
      5      5
      6      6
      7      7
      8      8
      9      9
     10     10
     11     11
     12     12
     13     13
     14     14
     15     15
     16     16
     17     17
     18     18
           1          16          13
      1      1
      2      2
      3      3
      4      4
      5      5
      6      6
      7      7
      8      8
      9      9
     10     10
     11     11
     12     12
     13     13
     14     14
     15     15
     16     16
     17     17
     18     18
           1          16          14
      1      1
      2      2
      3      3
      4      4
      5      5
      6      6
      7      7
      8      8
      9      9
     10     10
     11     11
     12     12
     13     13
     14     14
     15     15
     16     16
     17     17
     18     18
           1          16          15
      1      1
      2      2
      3      3
      4      4
      5      5
      6      6
      7      7
      8      8
      9      9
     10     10
     11     11
     12     12
     13     13
     14     14
     15     15
     16     16
     17     17
     18     18
           1          16          16
      1      1
      2      2
      3      3
      4      4
      5      5
      6      6
      7      7
      8      8
      9      9
     10     10
     11     11
     12     12
     13     13
     14     14
     15     15
     16     16
     17     17
     18     18
           1          16          17
      1      1
      2      2
      3      3
      4      4
      5      5
      6      6
      7      7
      8      8
      9      9
     10     10
     11     11
     12     12
     13     13
     14     14
     15     15
     16     16
     17     17
     18     18
           1          16          18
      1      1
      2      2
      3      3
      4      4
      5      5
      6      6
      7      7
      8      8
      9      9
     10     10
     11     11
     12     12
     13     13
     14     14
     15     15
     16     16
     17     17
     18     18
           1          16          19
      1      1
      2      2
      3      3
      4      4
      5      5
      6      6
      7      7
      8      8
      9      9
     10     10
     11     11
     12     12
     13     13
     14     14
     15     15
     16     16
     17     17
     18     18
           1          16          20
      1      1
      2      2
      3      3
      4      4
      5      5
      6      6
      7      7
      8      8
      9      9
     10     10
     11     11
     12     12
     13     13
     14     14
     15     15
     16     16
     17     17
     18     18
           1          16          21
      1      1
      2      2
      3      3
      4      4
      5      5
      6      6
      7      7
      8      8
      9      9
     10     10
     11     11
     12     12
     13     13
     14     14
     15     15
     16     16
     17     17
     18     18
           1          16          22
      1      1
      2      2
      3      3
      4      4
      5      5
      6      6
      7      7
      8      8
      9      9
     10     10
     11     11
     12     12
     13     13
     14     14
     15     15
     16     16
     17     17
     18     18
           1          16          23
      1      1
      2      2
      3      3
      4      4
      5      5
      6      6
      7      7
      8      8
      9      9
     10     10
     11     11
     12     12
     13     13
     14     14
     15     15
     16     16
     17     17
     18     18
           1          16          24
      1      1
      2      2
      3      3
      4      4
      5      5
      6      6
      7      7
      8      8
      9      9
     10     10
     11     11
     12     12
     13     13
     14     14
     15     15
     16     16
     17     17
     18     18
           1          16          25
      1      1
      2      2
      3      3
      4      4
      5      5
      6      6
      7      7
      8      8
      9      9
     10     10
     11     11
     12     12
     13     13
     14     14
     15     15
     16     16
     17     17
     18     18
           1          16          26
      1      1
      2      2
      3      3
      4      4
      5      5
      6      6
      7      7
      8      8
      9      9
     10     10
     11     11
     12     12
     13     13
     14     14
     15     15
     16     16
     17     17
     18     18
           1          16          27
      1      1
      2      2
      3      3
      4      4
      5      5
      6      6
      7      7
      8      8
      9      9
     10     10
     11     11
     12     12
     13     13
     14     14
     15     15
     16     16
     17     17
     18     18
           1          16          28
      1      1
      2      2
      3      3
      4      4
      5      5
      6      6
      7      7
      8      8
      9      9
     10     10
     11     11
     12     12
     13     13
     14     14
     15     15
     16     16
     17     17
     18     18
           1          16          29
      1      1
      2      2
      3      3
      4      4
      5      5
      6      6
      7      7
      8      8
      9      9
     10     10
     11     11
     12     12
     13     13
     14     14
     15     15
     16     16
     17     17
     18     18
           1          16          30
      1      1
      2      2
      3      3
      4      4
      5      5
      6      6
      7      7
      8      8
      9      9
     10     10
     11     11
     12     12
     13     13
     14     14
     15     15
     16     16
     17     17
     18     18
           1          16          31
      1      1
      2      2
      3      3
      4      4
      5      5
      6      6
      7      7
      8      8
      9      9
     10     10
     11     11
     12     12
     13     13
     14     14
     15     15
     16     16
     17     17
     18     18
           1          16          32
      1      1
      2      2
      3      3
      4      4
      5      5
      6      6
      7      7
      8      8
      9      9
     10     10
     11     11
     12     12
     13     13
     14     14
     15     15
     16     16
     17     17
     18     18
           1          17           1
      1      1
      2      2
      3      3
      4      4
      5      5
      6      6
      7      7
      8      8
      9      9
     10     10
     11     11
     12     12
     13     13
     14     14
     15     15
     16     16
     17     17
     18     18
           1          17           2
      1      1
      2      2
      3      3
      4      4
      5      5
      6      6
      7      7
      8      8
      9      9
     10     10
     11     11
     12     12
     13     13
     14     14
     15     15
     16     16
     17     17
     18     18
           1          17           3
      1      1
      2      2
      3      3
      4      4
      5      5
      6      6
      7      7
      8      8
      9      9
     10     10
     11     11
     12     12
     13     13
     14     14
     15     15
     16     16
     17     17
     18     18
           1          17           4
      1      1
      2      2
      3      3
      4      4
      5      5
      6      6
      7      7
      8      8
      9      9
     10     10
     11     11
     12     12
     13     13
     14     14
     15     15
     16     16
     17     17
     18     18
           1          17           5
      1      1
      2      2
      3      3
      4      4
      5      5
      6      6
      7      7
      8      8
      9      9
     10     10
     11     11
     12     12
     13     13
     14     14
     15     15
     16     16
     17     17
     18     18
           1          17           6
      1      1
      2      2
      3      3
      4      4
      5      5
      6      6
      7      7
      8      8
      9      9
     10     10
     11     11
     12     12
     13     13
     14     14
     15     15
     16     16
     17     17
     18     18
           1          17           7
      1      1
      2      2
      3      3
      4      4
      5      5
      6      6
      7      7
      8      8
      9      9
     10     10
     11     11
     12     12
     13     13
     14     14
     15     15
     16     16
     17     17
     18     18
           1          17           8
      1      1
      2      2
      3      3
      4      4
      5      5
      6      6
      7      7
      8      8
      9      9
     10     10
     11     11
     12     12
     13     13
     14     14
     15     15
     16     16
     17     17
     18     18
           1          17           9
      1      1
      2      2
      3      3
      4      4
      5      5
      6      6
      7      7
      8      8
      9      9
     10     10
     11     11
     12     12
     13     13
     14     14
     15     15
     16     16
     17     17
     18     18
           1          17          10
      1      1
      2      2
      3      3
      4      4
      5      5
      6      6
      7      7
      8      8
      9      9
     10     10
     11     11
     12     12
     13     13
     14     14
     15     15
     16     16
     17     17
     18     18
           1          17          11
      1      1
      2      2
      3      3
      4      4
      5      5
      6      6
      7      7
      8      8
      9      9
     10     10
     11     11
     12     12
     13     13
     14     14
     15     15
     16     16
     17     17
     18     18
           1          17          12
      1      1
      2      2
      3      3
      4      4
      5      5
      6      6
      7      7
      8      8
      9      9
     10     10
     11     11
     12     12
     13     13
     14     14
     15     15
     16     16
     17     17
     18     18
           1          17          13
      1      1
      2      2
      3      3
      4      4
      5      5
      6      6
      7      7
      8      8
      9      9
     10     10
     11     11
     12     12
     13     13
     14     14
     15     15
     16     16
     17     17
     18     18
           1          17          14
      1      1
      2      2
      3      3
      4      4
      5      5
      6      6
      7      7
      8      8
      9      9
     10     10
     11     11
     12     12
     13     13
     14     14
     15     15
     16     16
     17     17
     18     18
           1          17          15
      1      1
      2      2
      3      3
      4      4
      5      5
      6      6
      7      7
      8      8
      9      9
     10     10
     11     11
     12     12
     13     13
     14     14
     15     15
     16     16
     17     17
     18     18
           1          17          16
      1      1
      2      2
      3      3
      4      4
      5      5
      6      6
      7      7
      8      8
      9      9
     10     10
     11     11
     12     12
     13     13
     14     14
     15     15
     16     16
     17     17
     18     18
           1          17          17
      1      1
      2      2
      3      3
      4      4
      5      5
      6      6
      7      7
      8      8
      9      9
     10     10
     11     11
     12     12
     13     13
     14     14
     15     15
     16     16
     17     17
     18     18
           1          17          18
      1      1
      2      2
      3      3
      4      4
      5      5
      6      6
      7      7
      8      8
      9      9
     10     10
     11     11
     12     12
     13     13
     14     14
     15     15
     16     16
     17     17
     18     18
           1          17          19
      1      1
      2      2
      3      3
      4      4
      5      5
      6      6
      7      7
      8      8
      9      9
     10     10
     11     11
     12     12
     13     13
     14     14
     15     15
     16     16
     17     17
     18     18
           1          17          20
      1      1
      2      2
      3      3
      4      4
      5      5
      6      6
      7      7
      8      8
      9      9
     10     10
     11     11
     12     12
     13     13
     14     14
     15     15
     16     16
     17     17
     18     18
           1          17          21
      1      1
      2      2
      3      3
      4      4
      5      5
      6      6
      7      7
      8      8
      9      9
     10     10
     11     11
     12     12
     13     13
     14     14
     15     15
     16     16
     17     17
     18     18
           1          17          22
      1      1
      2      2
      3      3
      4      4
      5      5
      6      6
      7      7
      8      8
      9      9
     10     10
     11     11
     12     12
     13     13
     14     14
     15     15
     16     16
     17     17
     18     18
           1          17          23
      1      1
      2      2
      3      3
      4      4
      5      5
      6      6
      7      7
      8      8
      9      9
     10     10
     11     11
     12     12
     13     13
     14     14
     15     15
     16     16
     17     17
     18     18
           1          17          24
      1      1
      2      2
      3      3
      4      4
      5      5
      6      6
      7      7
      8      8
      9      9
     10     10
     11     11
     12     12
     13     13
     14     14
     15     15
     16     16
     17     17
     18     18
           1          17          25
      1      1
      2      2
      3      3
      4      4
      5      5
      6      6
      7      7
      8      8
      9      9
     10     10
     11     11
     12     12
     13     13
     14     14
     15     15
     16     16
     17     17
     18     18
           1          17          26
      1      1
      2      2
      3      3
      4      4
      5      5
      6      6
      7      7
      8      8
      9      9
     10     10
     11     11
     12     12
     13     13
     14     14
     15     15
     16     16
     17     17
     18     18
           1          17          27
      1      1
      2      2
      3      3
      4      4
      5      5
      6      6
      7      7
      8      8
      9      9
     10     10
     11     11
     12     12
     13     13
     14     14
     15     15
     16     16
     17     17
     18     18
           1          17          28
      1      1
      2      2
      3      3
      4      4
      5      5
      6      6
      7      7
      8      8
      9      9
     10     10
     11     11
     12     12
     13     13
     14     14
     15     15
     16     16
     17     17
     18     18
           1          17          29
      1      1
      2      2
      3      3
      4      4
      5      5
      6      6
      7      7
      8      8
      9      9
     10     10
     11     11
     12     12
     13     13
     14     14
     15     15
     16     16
     17     17
     18     18
           1          17          30
      1      1
      2      2
      3      3
      4      4
      5      5
      6      6
      7      7
      8      8
      9      9
     10     10
     11     11
     12     12
     13     13
     14     14
     15     15
     16     16
     17     17
     18     18
           1          17          31
      1      1
      2      2
      3      3
      4      4
      5      5
      6      6
      7      7
      8      8
      9      9
     10     10
     11     11
     12     12
     13     13
     14     14
     15     15
     16     16
     17     17
     18     18
           1          17          32
      1      1
      2      2
      3      3
      4      4
      5      5
      6      6
      7      7
      8      8
      9      9
     10     10
     11     11
     12     12
     13     13
     14     14
     15     15
     16     16
     17     17
     18     18
           1          18           1
      1      1
      2      2
      3      3
      4      4
      5      5
      6      6
      7      7
      8      8
      9      9
     10     10
     11     11
     12     12
     13     13
     14     14
     15     15
     16     16
     17     17
     18     18
           1          18           2
      1      1
      2      2
      3      3
      4      4
      5      5
      6      6
      7      7
      8      8
      9      9
     10     10
     11     11
     12     12
     13     13
     14     14
     15     15
     16     16
     17     17
     18     18
           1          18           3
      1      1
      2      2
      3      3
      4      4
      5      5
      6      6
      7      7
      8      8
      9      9
     10     10
     11     11
     12     12
     13     13
     14     14
     15     15
     16     16
     17     17
     18     18
           1          18           4
      1      1
      2      2
      3      3
      4      4
      5      5
      6      6
      7      7
      8      8
      9      9
     10     10
     11     11
     12     12
     13     13
     14     14
     15     15
     16     16
     17     17
     18     18
           1          18           5
      1      1
      2      2
      3      3
      4      4
      5      5
      6      6
      7      7
      8      8
      9      9
     10     10
     11     11
     12     12
     13     13
     14     14
     15     15
     16     16
     17     17
     18     18
           1          18           6
      1      1
      2      2
      3      3
      4      4
      5      5
      6      6
      7      7
      8      8
      9      9
     10     10
     11     11
     12     12
     13     13
     14     14
     15     15
     16     16
     17     17
     18     18
           1          18           7
      1      1
      2      2
      3      3
      4      4
      5      5
      6      6
      7      7
      8      8
      9      9
     10     10
     11     11
     12     12
     13     13
     14     14
     15     15
     16     16
     17     17
     18     18
           1          18           8
      1      1
      2      2
      3      3
      4      4
      5      5
      6      6
      7      7
      8      8
      9      9
     10     10
     11     11
     12     12
     13     13
     14     14
     15     15
     16     16
     17     17
     18     18
           1          18           9
      1      1
      2      2
      3      3
      4      4
      5      5
      6      6
      7      7
      8      8
      9      9
     10     10
     11     11
     12     12
     13     13
     14     14
     15     15
     16     16
     17     17
     18     18
           1          18          10
      1      1
      2      2
      3      3
      4      4
      5      5
      6      6
      7      7
      8      8
      9      9
     10     10
     11     11
     12     12
     13     13
     14     14
     15     15
     16     16
     17     17
     18     18
           1          18          11
      1      1
      2      2
      3      3
      4      4
      5      5
      6      6
      7      7
      8      8
      9      9
     10     10
     11     11
     12     12
     13     13
     14     14
     15     15
     16     16
     17     17
     18     18
           1          18          12
      1      1
      2      2
      3      3
      4      4
      5      5
      6      6
      7      7
      8      8
      9      9
     10     10
     11     11
     12     12
     13     13
     14     14
     15     15
     16     16
     17     17
     18     18
           1          18          13
      1      1
      2      2
      3      3
      4      4
      5      5
      6      6
      7      7
      8      8
      9      9
     10     10
     11     11
     12     12
     13     13
     14     14
     15     15
     16     16
     17     17
     18     18
           1          18          14
      1      1
      2      2
      3      3
      4      4
      5      5
      6      6
      7      7
      8      8
      9      9
     10     10
     11     11
     12     12
     13     13
     14     14
     15     15
     16     16
     17     17
     18     18
           1          18          15
      1      1
      2      2
      3      3
      4      4
      5      5
      6      6
      7      7
      8      8
      9      9
     10     10
     11     11
     12     12
     13     13
     14     14
     15     15
     16     16
     17     17
     18     18
           1          18          16
      1      1
      2      2
      3      3
      4      4
      5      5
      6      6
      7      7
      8      8
      9      9
     10     10
     11     11
     12     12
     13     13
     14     14
     15     15
     16     16
     17     17
     18     18
           1          18          17
      1      1
      2      2
      3      3
      4      4
      5      5
      6      6
      7      7
      8      8
      9      9
     10     10
     11     11
     12     12
     13     13
     14     14
     15     15
     16     16
     17     17
     18     18
           1          18          18
      1      1
      2      2
      3      3
      4      4
      5      5
      6      6
      7      7
      8      8
      9      9
     10     10
     11     11
     12     12
     13     13
     14     14
     15     15
     16     16
     17     17
     18     18
           1          18          19
      1      1
      2      2
      3      3
      4      4
      5      5
      6      6
      7      7
      8      8
      9      9
     10     10
     11     11
     12     12
     13     13
     14     14
     15     15
     16     16
     17     17
     18     18
           1          18          20
      1      1
      2      2
      3      3
      4      4
      5      5
      6      6
      7      7
      8      8
      9      9
     10     10
     11     11
     12     12
     13     13
     14     14
     15     15
     16     16
     17     17
     18     18
           1          18          21
      1      1
      2      2
      3      3
      4      4
      5      5
      6      6
      7      7
      8      8
      9      9
     10     10
     11     11
     12     12
     13     13
     14     14
     15     15
     16     16
     17     17
     18     18
           1          18          22
      1      1
      2      2
      3      3
      4      4
      5      5
      6      6
      7      7
      8      8
      9      9
     10     10
     11     11
     12     12
     13     13
     14     14
     15     15
     16     16
     17     17
     18     18
           1          18          23
      1      1
      2      2
      3      3
      4      4
      5      5
      6      6
      7      7
      8      8
      9      9
     10     10
     11     11
     12     12
     13     13
     14     14
     15     15
     16     16
     17     17
     18     18
           1          18          24
      1      1
      2      2
      3      3
      4      4
      5      5
      6      6
      7      7
      8      8
      9      9
     10     10
     11     11
     12     12
     13     13
     14     14
     15     15
     16     16
     17     17
     18     18
           1          18          25
      1      1
      2      2
      3      3
      4      4
      5      5
      6      6
      7      7
      8      8
      9      9
     10     10
     11     11
     12     12
     13     13
     14     14
     15     15
     16     16
     17     17
     18     18
           1          18          26
      1      1
      2      2
      3      3
      4      4
      5      5
      6      6
      7      7
      8      8
      9      9
     10     10
     11     11
     12     12
     13     13
     14     14
     15     15
     16     16
     17     17
     18     18
           1          18          27
      1      1
      2      2
      3      3
      4      4
      5      5
      6      6
      7      7
      8      8
      9      9
     10     10
     11     11
     12     12
     13     13
     14     14
     15     15
     16     16
     17     17
     18     18
           1          18          28
      1      1
      2      2
      3      3
      4      4
      5      5
      6      6
      7      7
      8      8
      9      9
     10     10
     11     11
     12     12
     13     13
     14     14
     15     15
     16     16
     17     17
     18     18
           1          18          29
      1      1
      2      2
      3      3
      4      4
      5      5
      6      6
      7      7
      8      8
      9      9
     10     10
     11     11
     12     12
     13     13
     14     14
     15     15
     16     16
     17     17
     18     18
           1          18          30
      1      1
      2      2
      3      3
      4      4
      5      5
      6      6
      7      7
      8      8
      9      9
     10     10
     11     11
     12     12
     13     13
     14     14
     15     15
     16     16
     17     17
     18     18
           1          18          31
      1      1
      2      2
      3      3
      4      4
      5      5
      6      6
      7      7
      8      8
      9      9
     10     10
     11     11
     12     12
     13     13
     14     14
     15     15
     16     16
     17     17
     18     18
           1          18          32
      1      1
      2      2
      3      3
      4      4
      5      5
      6      6
      7      7
      8      8
      9      9
     10     10
     11     11
     12     12
     13     13
     14     14
     15     15
     16     16
     17     17
     18     18
           1          19           1
      1      1
      2      2
      3      3
      4      4
      5      5
      6      6
      7      7
      8      8
      9      9
     10     10
     11     11
     12     12
     13     13
     14     14
     15     15
     16     16
     17     17
     18     18
           1          19           2
      1      1
      2      2
      3      3
      4      4
      5      5
      6      6
      7      7
      8      8
      9      9
     10     10
     11     11
     12     12
     13     13
     14     14
     15     15
     16     16
     17     17
     18     18
           1          19           3
      1      1
      2      2
      3      3
      4      4
      5      5
      6      6
      7      7
      8      8
      9      9
     10     10
     11     11
     12     12
     13     13
     14     14
     15     15
     16     16
     17     17
     18     18
           1          19           4
      1      1
      2      2
      3      3
      4      4
      5      5
      6      6
      7      7
      8      8
      9      9
     10     10
     11     11
     12     12
     13     13
     14     14
     15     15
     16     16
     17     17
     18     18
           1          19           5
      1      1
      2      2
      3      3
      4      4
      5      5
      6      6
      7      7
      8      8
      9      9
     10     10
     11     11
     12     12
     13     13
     14     14
     15     15
     16     16
     17     17
     18     18
           1          19           6
      1      1
      2      2
      3      3
      4      4
      5      5
      6      6
      7      7
      8      8
      9      9
     10     10
     11     11
     12     12
     13     13
     14     14
     15     15
     16     16
     17     17
     18     18
           1          19           7
      1      1
      2      2
      3      3
      4      4
      5      5
      6      6
      7      7
      8      8
      9      9
     10     10
     11     11
     12     12
     13     13
     14     14
     15     15
     16     16
     17     17
     18     18
           1          19           8
      1      1
      2      2
      3      3
      4      4
      5      5
      6      6
      7      7
      8      8
      9      9
     10     10
     11     11
     12     12
     13     13
     14     14
     15     15
     16     16
     17     17
     18     18
           1          19           9
      1      1
      2      2
      3      3
      4      4
      5      5
      6      6
      7      7
      8      8
      9      9
     10     10
     11     11
     12     12
     13     13
     14     14
     15     15
     16     16
     17     17
     18     18
           1          19          10
      1      1
      2      2
      3      3
      4      4
      5      5
      6      6
      7      7
      8      8
      9      9
     10     10
     11     11
     12     12
     13     13
     14     14
     15     15
     16     16
     17     17
     18     18
           1          19          11
      1      1
      2      2
      3      3
      4      4
      5      5
      6      6
      7      7
      8      8
      9      9
     10     10
     11     11
     12     12
     13     13
     14     14
     15     15
     16     16
     17     17
     18     18
           1          19          12
      1      1
      2      2
      3      3
      4      4
      5      5
      6      6
      7      7
      8      8
      9      9
     10     10
     11     11
     12     12
     13     13
     14     14
     15     15
     16     16
     17     17
     18     18
           1          19          13
      1      1
      2      2
      3      3
      4      4
      5      5
      6      6
      7      7
      8      8
      9      9
     10     10
     11     11
     12     12
     13     13
     14     14
     15     15
     16     16
     17     17
     18     18
           1          19          14
      1      1
      2      2
      3      3
      4      4
      5      5
      6      6
      7      7
      8      8
      9      9
     10     10
     11     11
     12     12
     13     13
     14     14
     15     15
     16     16
     17     17
     18     18
           1          19          15
      1      1
      2      2
      3      3
      4      4
      5      5
      6      6
      7      7
      8      8
      9      9
     10     10
     11     11
     12     12
     13     13
     14     14
     15     15
     16     16
     17     17
     18     18
           1          19          16
      1      1
      2      2
      3      3
      4      4
      5      5
      6      6
      7      7
      8      8
      9      9
     10     10
     11     11
     12     12
     13     13
     14     14
     15     15
     16     16
     17     17
     18     18
           1          19          17
      1      1
      2      2
      3      3
      4      4
      5      5
      6      6
      7      7
      8      8
      9      9
     10     10
     11     11
     12     12
     13     13
     14     14
     15     15
     16     16
     17     17
     18     18
           1          19          18
      1      1
      2      2
      3      3
      4      4
      5      5
      6      6
      7      7
      8      8
      9      9
     10     10
     11     11
     12     12
     13     13
     14     14
     15     15
     16     16
     17     17
     18     18
           1          19          19
      1      1
      2      2
      3      3
      4      4
      5      5
      6      6
      7      7
      8      8
      9      9
     10     10
     11     11
     12     12
     13     13
     14     14
     15     15
     16     16
     17     17
     18     18
           1          19          20
      1      1
      2      2
      3      3
      4      4
      5      5
      6      6
      7      7
      8      8
      9      9
     10     10
     11     11
     12     12
     13     13
     14     14
     15     15
     16     16
     17     17
     18     18
           1          19          21
      1      1
      2      2
      3      3
      4      4
      5      5
      6      6
      7      7
      8      8
      9      9
     10     10
     11     11
     12     12
     13     13
     14     14
     15     15
     16     16
     17     17
     18     18
           1          19          22
      1      1
      2      2
      3      3
      4      4
      5      5
      6      6
      7      7
      8      8
      9      9
     10     10
     11     11
     12     12
     13     13
     14     14
     15     15
     16     16
     17     17
     18     18
           1          19          23
      1      1
      2      2
      3      3
      4      4
      5      5
      6      6
      7      7
      8      8
      9      9
     10     10
     11     11
     12     12
     13     13
     14     14
     15     15
     16     16
     17     17
     18     18
           1          19          24
      1      1
      2      2
      3      3
      4      4
      5      5
      6      6
      7      7
      8      8
      9      9
     10     10
     11     11
     12     12
     13     13
     14     14
     15     15
     16     16
     17     17
     18     18
           1          19          25
      1      1
      2      2
      3      3
      4      4
      5      5
      6      6
      7      7
      8      8
      9      9
     10     10
     11     11
     12     12
     13     13
     14     14
     15     15
     16     16
     17     17
     18     18
           1          19          26
      1      1
      2      2
      3      3
      4      4
      5      5
      6      6
      7      7
      8      8
      9      9
     10     10
     11     11
     12     12
     13     13
     14     14
     15     15
     16     16
     17     17
     18     18
           1          19          27
      1      1
      2      2
      3      3
      4      4
      5      5
      6      6
      7      7
      8      8
      9      9
     10     10
     11     11
     12     12
     13     13
     14     14
     15     15
     16     16
     17     17
     18     18
           1          19          28
      1      1
      2      2
      3      3
      4      4
      5      5
      6      6
      7      7
      8      8
      9      9
     10     10
     11     11
     12     12
     13     13
     14     14
     15     15
     16     16
     17     17
     18     18
           1          19          29
      1      1
      2      2
      3      3
      4      4
      5      5
      6      6
      7      7
      8      8
      9      9
     10     10
     11     11
     12     12
     13     13
     14     14
     15     15
     16     16
     17     17
     18     18
           1          19          30
      1      1
      2      2
      3      3
      4      4
      5      5
      6      6
      7      7
      8      8
      9      9
     10     10
     11     11
     12     12
     13     13
     14     14
     15     15
     16     16
     17     17
     18     18
           1          19          31
      1      1
      2      2
      3      3
      4      4
      5      5
      6      6
      7      7
      8      8
      9      9
     10     10
     11     11
     12     12
     13     13
     14     14
     15     15
     16     16
     17     17
     18     18
           1          19          32
      1      1
      2      2
      3      3
      4      4
      5      5
      6      6
      7      7
      8      8
      9      9
     10     10
     11     11
     12     12
     13     13
     14     14
     15     15
     16     16
     17     17
     18     18
           1          20           1
      1      1
      2      2
      3      3
      4      4
      5      5
      6      6
      7      7
      8      8
      9      9
     10     10
     11     11
     12     12
     13     13
     14     14
     15     15
     16     16
     17     17
     18     18
           1          20           2
      1      1
      2      2
      3      3
      4      4
      5      5
      6      6
      7      7
      8      8
      9      9
     10     10
     11     11
     12     12
     13     13
     14     14
     15     15
     16     16
     17     17
     18     18
           1          20           3
      1      1
      2      2
      3      3
      4      4
      5      5
      6      6
      7      7
      8      8
      9      9
     10     10
     11     11
     12     12
     13     13
     14     14
     15     15
     16     16
     17     17
     18     18
           1          20           4
      1      1
      2      2
      3      3
      4      4
      5      5
      6      6
      7      7
      8      8
      9      9
     10     10
     11     11
     12     12
     13     13
     14     14
     15     15
     16     16
     17     17
     18     18
           1          20           5
      1      1
      2      2
      3      3
      4      4
      5      5
      6      6
      7      7
      8      8
      9      9
     10     10
     11     11
     12     12
     13     13
     14     14
     15     15
     16     16
     17     17
     18     18
           1          20           6
      1      1
      2      2
      3      3
      4      4
      5      5
      6      6
      7      7
      8      8
      9      9
     10     10
     11     11
     12     12
     13     13
     14     14
     15     15
     16     16
     17     17
     18     18
           1          20           7
      1      1
      2      2
      3      3
      4      4
      5      5
      6      6
      7      7
      8      8
      9      9
     10     10
     11     11
     12     12
     13     13
     14     14
     15     15
     16     16
     17     17
     18     18
           1          20           8
      1      1
      2      2
      3      3
      4      4
      5      5
      6      6
      7      7
      8      8
      9      9
     10     10
     11     11
     12     12
     13     13
     14     14
     15     15
     16     16
     17     17
     18     18
           1          20           9
      1      1
      2      2
      3      3
      4      4
      5      5
      6      6
      7      7
      8      8
      9      9
     10     10
     11     11
     12     12
     13     13
     14     14
     15     15
     16     16
     17     17
     18     18
           1          20          10
      1      1
      2      2
      3      3
      4      4
      5      5
      6      6
      7      7
      8      8
      9      9
     10     10
     11     11
     12     12
     13     13
     14     14
     15     15
     16     16
     17     17
     18     18
           1          20          11
      1      1
      2      2
      3      3
      4      4
      5      5
      6      6
      7      7
      8      8
      9      9
     10     10
     11     11
     12     12
     13     13
     14     14
     15     15
     16     16
     17     17
     18     18
           1          20          12
      1      1
      2      2
      3      3
      4      4
      5      5
      6      6
      7      7
      8      8
      9      9
     10     10
     11     11
     12     12
     13     13
     14     14
     15     15
     16     16
     17     17
     18     18
           1          20          13
      1      1
      2      2
      3      3
      4      4
      5      5
      6      6
      7      7
      8      8
      9      9
     10     10
     11     11
     12     12
     13     13
     14     14
     15     15
     16     16
     17     17
     18     18
           1          20          14
      1      1
      2      2
      3      3
      4      4
      5      5
      6      6
      7      7
      8      8
      9      9
     10     10
     11     11
     12     12
     13     13
     14     14
     15     15
     16     16
     17     17
     18     18
           1          20          15
      1      1
      2      2
      3      3
      4      4
      5      5
      6      6
      7      7
      8      8
      9      9
     10     10
     11     11
     12     12
     13     13
     14     14
     15     15
     16     16
     17     17
     18     18
           1          20          16
      1      1
      2      2
      3      3
      4      4
      5      5
      6      6
      7      7
      8      8
      9      9
     10     10
     11     11
     12     12
     13     13
     14     14
     15     15
     16     16
     17     17
     18     18
           1          20          17
      1      1
      2      2
      3      3
      4      4
      5      5
      6      6
      7      7
      8      8
      9      9
     10     10
     11     11
     12     12
     13     13
     14     14
     15     15
     16     16
     17     17
     18     18
           1          20          18
      1      1
      2      2
      3      3
      4      4
      5      5
      6      6
      7      7
      8      8
      9      9
     10     10
     11     11
     12     12
     13     13
     14     14
     15     15
     16     16
     17     17
     18     18
           1          20          19
      1      1
      2      2
      3      3
      4      4
      5      5
      6      6
      7      7
      8      8
      9      9
     10     10
     11     11
     12     12
     13     13
     14     14
     15     15
     16     16
     17     17
     18     18
           1          20          20
      1      1
      2      2
      3      3
      4      4
      5      5
      6      6
      7      7
      8      8
      9      9
     10     10
     11     11
     12     12
     13     13
     14     14
     15     15
     16     16
     17     17
     18     18
           1          20          21
      1      1
      2      2
      3      3
      4      4
      5      5
      6      6
      7      7
      8      8
      9      9
     10     10
     11     11
     12     12
     13     13
     14     14
     15     15
     16     16
     17     17
     18     18
           1          20          22
      1      1
      2      2
      3      3
      4      4
      5      5
      6      6
      7      7
      8      8
      9      9
     10     10
     11     11
     12     12
     13     13
     14     14
     15     15
     16     16
     17     17
     18     18
           1          20          23
      1      1
      2      2
      3      3
      4      4
      5      5
      6      6
      7      7
      8      8
      9      9
     10     10
     11     11
     12     12
     13     13
     14     14
     15     15
     16     16
     17     17
     18     18
           1          20          24
      1      1
      2      2
      3      3
      4      4
      5      5
      6      6
      7      7
      8      8
      9      9
     10     10
     11     11
     12     12
     13     13
     14     14
     15     15
     16     16
     17     17
     18     18
           1          20          25
      1      1
      2      2
      3      3
      4      4
      5      5
      6      6
      7      7
      8      8
      9      9
     10     10
     11     11
     12     12
     13     13
     14     14
     15     15
     16     16
     17     17
     18     18
           1          20          26
      1      1
      2      2
      3      3
      4      4
      5      5
      6      6
      7      7
      8      8
      9      9
     10     10
     11     11
     12     12
     13     13
     14     14
     15     15
     16     16
     17     17
     18     18
           1          20          27
      1      1
      2      2
      3      3
      4      4
      5      5
      6      6
      7      7
      8      8
      9      9
     10     10
     11     11
     12     12
     13     13
     14     14
     15     15
     16     16
     17     17
     18     18
           1          20          28
      1      1
      2      2
      3      3
      4      4
      5      5
      6      6
      7      7
      8      8
      9      9
     10     10
     11     11
     12     12
     13     13
     14     14
     15     15
     16     16
     17     17
     18     18
           1          20          29
      1      1
      2      2
      3      3
      4      4
      5      5
      6      6
      7      7
      8      8
      9      9
     10     10
     11     11
     12     12
     13     13
     14     14
     15     15
     16     16
     17     17
     18     18
           1          20          30
      1      1
      2      2
      3      3
      4      4
      5      5
      6      6
      7      7
      8      8
      9      9
     10     10
     11     11
     12     12
     13     13
     14     14
     15     15
     16     16
     17     17
     18     18
           1          20          31
      1      1
      2      2
      3      3
      4      4
      5      5
      6      6
      7      7
      8      8
      9      9
     10     10
     11     11
     12     12
     13     13
     14     14
     15     15
     16     16
     17     17
     18     18
           1          20          32
      1      1
      2      2
      3      3
      4      4
      5      5
      6      6
      7      7
      8      8
      9      9
     10     10
     11     11
     12     12
     13     13
     14     14
     15     15
     16     16
     17     17
     18     18
           1          21           1
      1      1
      2      2
      3      3
      4      4
      5      5
      6      6
      7      7
      8      8
      9      9
     10     10
     11     11
     12     12
     13     13
     14     14
     15     15
     16     16
     17     17
     18     18
           1          21           2
      1      1
      2      2
      3      3
      4      4
      5      5
      6      6
      7      7
      8      8
      9      9
     10     10
     11     11
     12     12
     13     13
     14     14
     15     15
     16     16
     17     17
     18     18
           1          21           3
      1      1
      2      2
      3      3
      4      4
      5      5
      6      6
      7      7
      8      8
      9      9
     10     10
     11     11
     12     12
     13     13
     14     14
     15     15
     16     16
     17     17
     18     18
           1          21           4
      1      1
      2      2
      3      3
      4      4
      5      5
      6      6
      7      7
      8      8
      9      9
     10     10
     11     11
     12     12
     13     13
     14     14
     15     15
     16     16
     17     17
     18     18
           1          21           5
      1      1
      2      2
      3      3
      4      4
      5      5
      6      6
      7      7
      8      8
      9      9
     10     10
     11     11
     12     12
     13     13
     14     14
     15     15
     16     16
     17     17
     18     18
           1          21           6
      1      1
      2      2
      3      3
      4      4
      5      5
      6      6
      7      7
      8      8
      9      9
     10     10
     11     11
     12     12
     13     13
     14     14
     15     15
     16     16
     17     17
     18     18
           1          21           7
      1      1
      2      2
      3      3
      4      4
      5      5
      6      6
      7      7
      8      8
      9      9
     10     10
     11     11
     12     12
     13     13
     14     14
     15     15
     16     16
     17     17
     18     18
           1          21           8
      1      1
      2      2
      3      3
      4      4
      5      5
      6      6
      7      7
      8      8
      9      9
     10     10
     11     11
     12     12
     13     13
     14     14
     15     15
     16     16
     17     17
     18     18
           1          21           9
      1      1
      2      2
      3      3
      4      4
      5      5
      6      6
      7      7
      8      8
      9      9
     10     10
     11     11
     12     12
     13     13
     14     14
     15     15
     16     16
     17     17
     18     18
           1          21          10
      1      1
      2      2
      3      3
      4      4
      5      5
      6      6
      7      7
      8      8
      9      9
     10     10
     11     11
     12     12
     13     13
     14     14
     15     15
     16     16
     17     17
     18     18
           1          21          11
      1      1
      2      2
      3      3
      4      4
      5      5
      6      6
      7      7
      8      8
      9      9
     10     10
     11     11
     12     12
     13     13
     14     14
     15     15
     16     16
     17     17
     18     18
           1          21          12
      1      1
      2      2
      3      3
      4      4
      5      5
      6      6
      7      7
      8      8
      9      9
     10     10
     11     11
     12     12
     13     13
     14     14
     15     15
     16     16
     17     17
     18     18
           1          21          13
      1      1
      2      2
      3      3
      4      4
      5      5
      6      6
      7      7
      8      8
      9      9
     10     10
     11     11
     12     12
     13     13
     14     14
     15     15
     16     16
     17     17
     18     18
           1          21          14
      1      1
      2      2
      3      3
      4      4
      5      5
      6      6
      7      7
      8      8
      9      9
     10     10
     11     11
     12     12
     13     13
     14     14
     15     15
     16     16
     17     17
     18     18
           1          21          15
      1      1
      2      2
      3      3
      4      4
      5      5
      6      6
      7      7
      8      8
      9      9
     10     10
     11     11
     12     12
     13     13
     14     14
     15     15
     16     16
     17     17
     18     18
           1          21          16
      1      1
      2      2
      3      3
      4      4
      5      5
      6      6
      7      7
      8      8
      9      9
     10     10
     11     11
     12     12
     13     13
     14     14
     15     15
     16     16
     17     17
     18     18
           1          21          17
      1      1
      2      2
      3      3
      4      4
      5      5
      6      6
      7      7
      8      8
      9      9
     10     10
     11     11
     12     12
     13     13
     14     14
     15     15
     16     16
     17     17
     18     18
           1          21          18
      1      1
      2      2
      3      3
      4      4
      5      5
      6      6
      7      7
      8      8
      9      9
     10     10
     11     11
     12     12
     13     13
     14     14
     15     15
     16     16
     17     17
     18     18
           1          21          19
      1      1
      2      2
      3      3
      4      4
      5      5
      6      6
      7      7
      8      8
      9      9
     10     10
     11     11
     12     12
     13     13
     14     14
     15     15
     16     16
     17     17
     18     18
           1          21          20
      1      1
      2      2
      3      3
      4      4
      5      5
      6      6
      7      7
      8      8
      9      9
     10     10
     11     11
     12     12
     13     13
     14     14
     15     15
     16     16
     17     17
     18     18
           1          21          21
      1      1
      2      2
      3      3
      4      4
      5      5
      6      6
      7      7
      8      8
      9      9
     10     10
     11     11
     12     12
     13     13
     14     14
     15     15
     16     16
     17     17
     18     18
           1          21          22
      1      1
      2      2
      3      3
      4      4
      5      5
      6      6
      7      7
      8      8
      9      9
     10     10
     11     11
     12     12
     13     13
     14     14
     15     15
     16     16
     17     17
     18     18
           1          21          23
      1      1
      2      2
      3      3
      4      4
      5      5
      6      6
      7      7
      8      8
      9      9
     10     10
     11     11
     12     12
     13     13
     14     14
     15     15
     16     16
     17     17
     18     18
           1          21          24
      1      1
      2      2
      3      3
      4      4
      5      5
      6      6
      7      7
      8      8
      9      9
     10     10
     11     11
     12     12
     13     13
     14     14
     15     15
     16     16
     17     17
     18     18
           1          21          25
      1      1
      2      2
      3      3
      4      4
      5      5
      6      6
      7      7
      8      8
      9      9
     10     10
     11     11
     12     12
     13     13
     14     14
     15     15
     16     16
     17     17
     18     18
           1          21          26
      1      1
      2      2
      3      3
      4      4
      5      5
      6      6
      7      7
      8      8
      9      9
     10     10
     11     11
     12     12
     13     13
     14     14
     15     15
     16     16
     17     17
     18     18
           1          21          27
      1      1
      2      2
      3      3
      4      4
      5      5
      6      6
      7      7
      8      8
      9      9
     10     10
     11     11
     12     12
     13     13
     14     14
     15     15
     16     16
     17     17
     18     18
           1          21          28
      1      1
      2      2
      3      3
      4      4
      5      5
      6      6
      7      7
      8      8
      9      9
     10     10
     11     11
     12     12
     13     13
     14     14
     15     15
     16     16
     17     17
     18     18
           1          21          29
      1      1
      2      2
      3      3
      4      4
      5      5
      6      6
      7      7
      8      8
      9      9
     10     10
     11     11
     12     12
     13     13
     14     14
     15     15
     16     16
     17     17
     18     18
           1          21          30
      1      1
      2      2
      3      3
      4      4
      5      5
      6      6
      7      7
      8      8
      9      9
     10     10
     11     11
     12     12
     13     13
     14     14
     15     15
     16     16
     17     17
     18     18
           1          21          31
      1      1
      2      2
      3      3
      4      4
      5      5
      6      6
      7      7
      8      8
      9      9
     10     10
     11     11
     12     12
     13     13
     14     14
     15     15
     16     16
     17     17
     18     18
           1          21          32
      1      1
      2      2
      3      3
      4      4
      5      5
      6      6
      7      7
      8      8
      9      9
     10     10
     11     11
     12     12
     13     13
     14     14
     15     15
     16     16
     17     17
     18     18
           1          22           1
      1      1
      2      2
      3      3
      4      4
      5      5
      6      6
      7      7
      8      8
      9      9
     10     10
     11     11
     12     12
     13     13
     14     14
     15     15
     16     16
     17     17
     18     18
           1          22           2
      1      1
      2      2
      3      3
      4      4
      5      5
      6      6
      7      7
      8      8
      9      9
     10     10
     11     11
     12     12
     13     13
     14     14
     15     15
     16     16
     17     17
     18     18
           1          22           3
      1      1
      2      2
      3      3
      4      4
      5      5
      6      6
      7      7
      8      8
      9      9
     10     10
     11     11
     12     12
     13     13
     14     14
     15     15
     16     16
     17     17
     18     18
           1          22           4
      1      1
      2      2
      3      3
      4      4
      5      5
      6      6
      7      7
      8      8
      9      9
     10     10
     11     11
     12     12
     13     13
     14     14
     15     15
     16     16
     17     17
     18     18
           1          22           5
      1      1
      2      2
      3      3
      4      4
      5      5
      6      6
      7      7
      8      8
      9      9
     10     10
     11     11
     12     12
     13     13
     14     14
     15     15
     16     16
     17     17
     18     18
           1          22           6
      1      1
      2      2
      3      3
      4      4
      5      5
      6      6
      7      7
      8      8
      9      9
     10     10
     11     11
     12     12
     13     13
     14     14
     15     15
     16     16
     17     17
     18     18
           1          22           7
      1      1
      2      2
      3      3
      4      4
      5      5
      6      6
      7      7
      8      8
      9      9
     10     10
     11     11
     12     12
     13     13
     14     14
     15     15
     16     16
     17     17
     18     18
           1          22           8
      1      1
      2      2
      3      3
      4      4
      5      5
      6      6
      7      7
      8      8
      9      9
     10     10
     11     11
     12     12
     13     13
     14     14
     15     15
     16     16
     17     17
     18     18
           1          22           9
      1      1
      2      2
      3      3
      4      4
      5      5
      6      6
      7      7
      8      8
      9      9
     10     10
     11     11
     12     12
     13     13
     14     14
     15     15
     16     16
     17     17
     18     18
           1          22          10
      1      1
      2      2
      3      3
      4      4
      5      5
      6      6
      7      7
      8      8
      9      9
     10     10
     11     11
     12     12
     13     13
     14     14
     15     15
     16     16
     17     17
     18     18
           1          22          11
      1      1
      2      2
      3      3
      4      4
      5      5
      6      6
      7      7
      8      8
      9      9
     10     10
     11     11
     12     12
     13     13
     14     14
     15     15
     16     16
     17     17
     18     18
           1          22          12
      1      1
      2      2
      3      3
      4      4
      5      5
      6      6
      7      7
      8      8
      9      9
     10     10
     11     11
     12     12
     13     13
     14     14
     15     15
     16     16
     17     17
     18     18
           1          22          13
      1      1
      2      2
      3      3
      4      4
      5      5
      6      6
      7      7
      8      8
      9      9
     10     10
     11     11
     12     12
     13     13
     14     14
     15     15
     16     16
     17     17
     18     18
           1          22          14
      1      1
      2      2
      3      3
      4      4
      5      5
      6      6
      7      7
      8      8
      9      9
     10     10
     11     11
     12     12
     13     13
     14     14
     15     15
     16     16
     17     17
     18     18
           1          22          15
      1      1
      2      2
      3      3
      4      4
      5      5
      6      6
      7      7
      8      8
      9      9
     10     10
     11     11
     12     12
     13     13
     14     14
     15     15
     16     16
     17     17
     18     18
           1          22          16
      1      1
      2      2
      3      3
      4      4
      5      5
      6      6
      7      7
      8      8
      9      9
     10     10
     11     11
     12     12
     13     13
     14     14
     15     15
     16     16
     17     17
     18     18
           1          22          17
      1      1
      2      2
      3      3
      4      4
      5      5
      6      6
      7      7
      8      8
      9      9
     10     10
     11     11
     12     12
     13     13
     14     14
     15     15
     16     16
     17     17
     18     18
           1          22          18
      1      1
      2      2
      3      3
      4      4
      5      5
      6      6
      7      7
      8      8
      9      9
     10     10
     11     11
     12     12
     13     13
     14     14
     15     15
     16     16
     17     17
     18     18
           1          22          19
      1      1
      2      2
      3      3
      4      4
      5      5
      6      6
      7      7
      8      8
      9      9
     10     10
     11     11
     12     12
     13     13
     14     14
     15     15
     16     16
     17     17
     18     18
           1          22          20
      1      1
      2      2
      3      3
      4      4
      5      5
      6      6
      7      7
      8      8
      9      9
     10     10
     11     11
     12     12
     13     13
     14     14
     15     15
     16     16
     17     17
     18     18
           1          22          21
      1      1
      2      2
      3      3
      4      4
      5      5
      6      6
      7      7
      8      8
      9      9
     10     10
     11     11
     12     12
     13     13
     14     14
     15     15
     16     16
     17     17
     18     18
           1          22          22
      1      1
      2      2
      3      3
      4      4
      5      5
      6      6
      7      7
      8      8
      9      9
     10     10
     11     11
     12     12
     13     13
     14     14
     15     15
     16     16
     17     17
     18     18
           1          22          23
      1      1
      2      2
      3      3
      4      4
      5      5
      6      6
      7      7
      8      8
      9      9
     10     10
     11     11
     12     12
     13     13
     14     14
     15     15
     16     16
     17     17
     18     18
           1          22          24
      1      1
      2      2
      3      3
      4      4
      5      5
      6      6
      7      7
      8      8
      9      9
     10     10
     11     11
     12     12
     13     13
     14     14
     15     15
     16     16
     17     17
     18     18
           1          22          25
      1      1
      2      2
      3      3
      4      4
      5      5
      6      6
      7      7
      8      8
      9      9
     10     10
     11     11
     12     12
     13     13
     14     14
     15     15
     16     16
     17     17
     18     18
           1          22          26
      1      1
      2      2
      3      3
      4      4
      5      5
      6      6
      7      7
      8      8
      9      9
     10     10
     11     11
     12     12
     13     13
     14     14
     15     15
     16     16
     17     17
     18     18
           1          22          27
      1      1
      2      2
      3      3
      4      4
      5      5
      6      6
      7      7
      8      8
      9      9
     10     10
     11     11
     12     12
     13     13
     14     14
     15     15
     16     16
     17     17
     18     18
           1          22          28
      1      1
      2      2
      3      3
      4      4
      5      5
      6      6
      7      7
      8      8
      9      9
     10     10
     11     11
     12     12
     13     13
     14     14
     15     15
     16     16
     17     17
     18     18
           1          22          29
      1      1
      2      2
      3      3
      4      4
      5      5
      6      6
      7      7
      8      8
      9      9
     10     10
     11     11
     12     12
     13     13
     14     14
     15     15
     16     16
     17     17
     18     18
           1          22          30
      1      1
      2      2
      3      3
      4      4
      5      5
      6      6
      7      7
      8      8
      9      9
     10     10
     11     11
     12     12
     13     13
     14     14
     15     15
     16     16
     17     17
     18     18
           1          22          31
      1      1
      2      2
      3      3
      4      4
      5      5
      6      6
      7      7
      8      8
      9      9
     10     10
     11     11
     12     12
     13     13
     14     14
     15     15
     16     16
     17     17
     18     18
           1          22          32
      1      1
      2      2
      3      3
      4      4
      5      5
      6      6
      7      7
      8      8
      9      9
     10     10
     11     11
     12     12
     13     13
     14     14
     15     15
     16     16
     17     17
     18     18
           1          23           1
      1      1
      2      2
      3      3
      4      4
      5      5
      6      6
      7      7
      8      8
      9      9
     10     10
     11     11
     12     12
     13     13
     14     14
     15     15
     16     16
     17     17
     18     18
           1          23           2
      1      1
      2      2
      3      3
      4      4
      5      5
      6      6
      7      7
      8      8
      9      9
     10     10
     11     11
     12     12
     13     13
     14     14
     15     15
     16     16
     17     17
     18     18
           1          23           3
      1      1
      2      2
      3      3
      4      4
      5      5
      6      6
      7      7
      8      8
      9      9
     10     10
     11     11
     12     12
     13     13
     14     14
     15     15
     16     16
     17     17
     18     18
           1          23           4
      1      1
      2      2
      3      3
      4      4
      5      5
      6      6
      7      7
      8      8
      9      9
     10     10
     11     11
     12     12
     13     13
     14     14
     15     15
     16     16
     17     17
     18     18
           1          23           5
      1      1
      2      2
      3      3
      4      4
      5      5
      6      6
      7      7
      8      8
      9      9
     10     10
     11     11
     12     12
     13     13
     14     14
     15     15
     16     16
     17     17
     18     18
           1          23           6
      1      1
      2      2
      3      3
      4      4
      5      5
      6      6
      7      7
      8      8
      9      9
     10     10
     11     11
     12     12
     13     13
     14     14
     15     15
     16     16
     17     17
     18     18
           1          23           7
      1      1
      2      2
      3      3
      4      4
      5      5
      6      6
      7      7
      8      8
      9      9
     10     10
     11     11
     12     12
     13     13
     14     14
     15     15
     16     16
     17     17
     18     18
           1          23           8
      1      1
      2      2
      3      3
      4      4
      5      5
      6      6
      7      7
      8      8
      9      9
     10     10
     11     11
     12     12
     13     13
     14     14
     15     15
     16     16
     17     17
     18     18
           1          23           9
      1      1
      2      2
      3      3
      4      4
      5      5
      6      6
      7      7
      8      8
      9      9
     10     10
     11     11
     12     12
     13     13
     14     14
     15     15
     16     16
     17     17
     18     18
           1          23          10
      1      1
      2      2
      3      3
      4      4
      5      5
      6      6
      7      7
      8      8
      9      9
     10     10
     11     11
     12     12
     13     13
     14     14
     15     15
     16     16
     17     17
     18     18
           1          23          11
      1      1
      2      2
      3      3
      4      4
      5      5
      6      6
      7      7
      8      8
      9      9
     10     10
     11     11
     12     12
     13     13
     14     14
     15     15
     16     16
     17     17
     18     18
           1          23          12
      1      1
      2      2
      3      3
      4      4
      5      5
      6      6
      7      7
      8      8
      9      9
     10     10
     11     11
     12     12
     13     13
     14     14
     15     15
     16     16
     17     17
     18     18
           1          23          13
      1      1
      2      2
      3      3
      4      4
      5      5
      6      6
      7      7
      8      8
      9      9
     10     10
     11     11
     12     12
     13     13
     14     14
     15     15
     16     16
     17     17
     18     18
           1          23          14
      1      1
      2      2
      3      3
      4      4
      5      5
      6      6
      7      7
      8      8
      9      9
     10     10
     11     11
     12     12
     13     13
     14     14
     15     15
     16     16
     17     17
     18     18
           1          23          15
      1      1
      2      2
      3      3
      4      4
      5      5
      6      6
      7      7
      8      8
      9      9
     10     10
     11     11
     12     12
     13     13
     14     14
     15     15
     16     16
     17     17
     18     18
           1          23          16
      1      1
      2      2
      3      3
      4      4
      5      5
      6      6
      7      7
      8      8
      9      9
     10     10
     11     11
     12     12
     13     13
     14     14
     15     15
     16     16
     17     17
     18     18
           1          23          17
      1      1
      2      2
      3      3
      4      4
      5      5
      6      6
      7      7
      8      8
      9      9
     10     10
     11     11
     12     12
     13     13
     14     14
     15     15
     16     16
     17     17
     18     18
           1          23          18
      1      1
      2      2
      3      3
      4      4
      5      5
      6      6
      7      7
      8      8
      9      9
     10     10
     11     11
     12     12
     13     13
     14     14
     15     15
     16     16
     17     17
     18     18
           1          23          19
      1      1
      2      2
      3      3
      4      4
      5      5
      6      6
      7      7
      8      8
      9      9
     10     10
     11     11
     12     12
     13     13
     14     14
     15     15
     16     16
     17     17
     18     18
           1          23          20
      1      1
      2      2
      3      3
      4      4
      5      5
      6      6
      7      7
      8      8
      9      9
     10     10
     11     11
     12     12
     13     13
     14     14
     15     15
     16     16
     17     17
     18     18
           1          23          21
      1      1
      2      2
      3      3
      4      4
      5      5
      6      6
      7      7
      8      8
      9      9
     10     10
     11     11
     12     12
     13     13
     14     14
     15     15
     16     16
     17     17
     18     18
           1          23          22
      1      1
      2      2
      3      3
      4      4
      5      5
      6      6
      7      7
      8      8
      9      9
     10     10
     11     11
     12     12
     13     13
     14     14
     15     15
     16     16
     17     17
     18     18
           1          23          23
      1      1
      2      2
      3      3
      4      4
      5      5
      6      6
      7      7
      8      8
      9      9
     10     10
     11     11
     12     12
     13     13
     14     14
     15     15
     16     16
     17     17
     18     18
           1          23          24
      1      1
      2      2
      3      3
      4      4
      5      5
      6      6
      7      7
      8      8
      9      9
     10     10
     11     11
     12     12
     13     13
     14     14
     15     15
     16     16
     17     17
     18     18
           1          23          25
      1      1
      2      2
      3      3
      4      4
      5      5
      6      6
      7      7
      8      8
      9      9
     10     10
     11     11
     12     12
     13     13
     14     14
     15     15
     16     16
     17     17
     18     18
           1          23          26
      1      1
      2      2
      3      3
      4      4
      5      5
      6      6
      7      7
      8      8
      9      9
     10     10
     11     11
     12     12
     13     13
     14     14
     15     15
     16     16
     17     17
     18     18
           1          23          27
      1      1
      2      2
      3      3
      4      4
      5      5
      6      6
      7      7
      8      8
      9      9
     10     10
     11     11
     12     12
     13     13
     14     14
     15     15
     16     16
     17     17
     18     18
           1          23          28
      1      1
      2      2
      3      3
      4      4
      5      5
      6      6
      7      7
      8      8
      9      9
     10     10
     11     11
     12     12
     13     13
     14     14
     15     15
     16     16
     17     17
     18     18
           1          23          29
      1      1
      2      2
      3      3
      4      4
      5      5
      6      6
      7      7
      8      8
      9      9
     10     10
     11     11
     12     12
     13     13
     14     14
     15     15
     16     16
     17     17
     18     18
           1          23          30
      1      1
      2      2
      3      3
      4      4
      5      5
      6      6
      7      7
      8      8
      9      9
     10     10
     11     11
     12     12
     13     13
     14     14
     15     15
     16     16
     17     17
     18     18
           1          23          31
      1      1
      2      2
      3      3
      4      4
      5      5
      6      6
      7      7
      8      8
      9      9
     10     10
     11     11
     12     12
     13     13
     14     14
     15     15
     16     16
     17     17
     18     18
           1          23          32
      1      1
      2      2
      3      3
      4      4
      5      5
      6      6
      7      7
      8      8
      9      9
     10     10
     11     11
     12     12
     13     13
     14     14
     15     15
     16     16
     17     17
     18     18
           1          24           1
      1      1
      2      2
      3      3
      4      4
      5      5
      6      6
      7      7
      8      8
      9      9
     10     10
     11     11
     12     12
     13     13
     14     14
     15     15
     16     16
     17     17
     18     18
           1          24           2
      1      1
      2      2
      3      3
      4      4
      5      5
      6      6
      7      7
      8      8
      9      9
     10     10
     11     11
     12     12
     13     13
     14     14
     15     15
     16     16
     17     17
     18     18
           1          24           3
      1      1
      2      2
      3      3
      4      4
      5      5
      6      6
      7      7
      8      8
      9      9
     10     10
     11     11
     12     12
     13     13
     14     14
     15     15
     16     16
     17     17
     18     18
           1          24           4
      1      1
      2      2
      3      3
      4      4
      5      5
      6      6
      7      7
      8      8
      9      9
     10     10
     11     11
     12     12
     13     13
     14     14
     15     15
     16     16
     17     17
     18     18
           1          24           5
      1      1
      2      2
      3      3
      4      4
      5      5
      6      6
      7      7
      8      8
      9      9
     10     10
     11     11
     12     12
     13     13
     14     14
     15     15
     16     16
     17     17
     18     18
           1          24           6
      1      1
      2      2
      3      3
      4      4
      5      5
      6      6
      7      7
      8      8
      9      9
     10     10
     11     11
     12     12
     13     13
     14     14
     15     15
     16     16
     17     17
     18     18
           1          24           7
      1      1
      2      2
      3      3
      4      4
      5      5
      6      6
      7      7
      8      8
      9      9
     10     10
     11     11
     12     12
     13     13
     14     14
     15     15
     16     16
     17     17
     18     18
           1          24           8
      1      1
      2      2
      3      3
      4      4
      5      5
      6      6
      7      7
      8      8
      9      9
     10     10
     11     11
     12     12
     13     13
     14     14
     15     15
     16     16
     17     17
     18     18
           1          24           9
      1      1
      2      2
      3      3
      4      4
      5      5
      6      6
      7      7
      8      8
      9      9
     10     10
     11     11
     12     12
     13     13
     14     14
     15     15
     16     16
     17     17
     18     18
           1          24          10
      1      1
      2      2
      3      3
      4      4
      5      5
      6      6
      7      7
      8      8
      9      9
     10     10
     11     11
     12     12
     13     13
     14     14
     15     15
     16     16
     17     17
     18     18
           1          24          11
      1      1
      2      2
      3      3
      4      4
      5      5
      6      6
      7      7
      8      8
      9      9
     10     10
     11     11
     12     12
     13     13
     14     14
     15     15
     16     16
     17     17
     18     18
           1          24          12
      1      1
      2      2
      3      3
      4      4
      5      5
      6      6
      7      7
      8      8
      9      9
     10     10
     11     11
     12     12
     13     13
     14     14
     15     15
     16     16
     17     17
     18     18
           1          24          13
      1      1
      2      2
      3      3
      4      4
      5      5
      6      6
      7      7
      8      8
      9      9
     10     10
     11     11
     12     12
     13     13
     14     14
     15     15
     16     16
     17     17
     18     18
           1          24          14
      1      1
      2      2
      3      3
      4      4
      5      5
      6      6
      7      7
      8      8
      9      9
     10     10
     11     11
     12     12
     13     13
     14     14
     15     15
     16     16
     17     17
     18     18
           1          24          15
      1      1
      2      2
      3      3
      4      4
      5      5
      6      6
      7      7
      8      8
      9      9
     10     10
     11     11
     12     12
     13     13
     14     14
     15     15
     16     16
     17     17
     18     18
           1          24          16
      1      1
      2      2
      3      3
      4      4
      5      5
      6      6
      7      7
      8      8
      9      9
     10     10
     11     11
     12     12
     13     13
     14     14
     15     15
     16     16
     17     17
     18     18
           1          24          17
      1      1
      2      2
      3      3
      4      4
      5      5
      6      6
      7      7
      8      8
      9      9
     10     10
     11     11
     12     12
     13     13
     14     14
     15     15
     16     16
     17     17
     18     18
           1          24          18
      1      1
      2      2
      3      3
      4      4
      5      5
      6      6
      7      7
      8      8
      9      9
     10     10
     11     11
     12     12
     13     13
     14     14
     15     15
     16     16
     17     17
     18     18
           1          24          19
      1      1
      2      2
      3      3
      4      4
      5      5
      6      6
      7      7
      8      8
      9      9
     10     10
     11     11
     12     12
     13     13
     14     14
     15     15
     16     16
     17     17
     18     18
           1          24          20
      1      1
      2      2
      3      3
      4      4
      5      5
      6      6
      7      7
      8      8
      9      9
     10     10
     11     11
     12     12
     13     13
     14     14
     15     15
     16     16
     17     17
     18     18
           1          24          21
      1      1
      2      2
      3      3
      4      4
      5      5
      6      6
      7      7
      8      8
      9      9
     10     10
     11     11
     12     12
     13     13
     14     14
     15     15
     16     16
     17     17
     18     18
           1          24          22
      1      1
      2      2
      3      3
      4      4
      5      5
      6      6
      7      7
      8      8
      9      9
     10     10
     11     11
     12     12
     13     13
     14     14
     15     15
     16     16
     17     17
     18     18
           1          24          23
      1      1
      2      2
      3      3
      4      4
      5      5
      6      6
      7      7
      8      8
      9      9
     10     10
     11     11
     12     12
     13     13
     14     14
     15     15
     16     16
     17     17
     18     18
           1          24          24
      1      1
      2      2
      3      3
      4      4
      5      5
      6      6
      7      7
      8      8
      9      9
     10     10
     11     11
     12     12
     13     13
     14     14
     15     15
     16     16
     17     17
     18     18
           1          24          25
      1      1
      2      2
      3      3
      4      4
      5      5
      6      6
      7      7
      8      8
      9      9
     10     10
     11     11
     12     12
     13     13
     14     14
     15     15
     16     16
     17     17
     18     18
           1          24          26
      1      1
      2      2
      3      3
      4      4
      5      5
      6      6
      7      7
      8      8
      9      9
     10     10
     11     11
     12     12
     13     13
     14     14
     15     15
     16     16
     17     17
     18     18
           1          24          27
      1      1
      2      2
      3      3
      4      4
      5      5
      6      6
      7      7
      8      8
      9      9
     10     10
     11     11
     12     12
     13     13
     14     14
     15     15
     16     16
     17     17
     18     18
           1          24          28
      1      1
      2      2
      3      3
      4      4
      5      5
      6      6
      7      7
      8      8
      9      9
     10     10
     11     11
     12     12
     13     13
     14     14
     15     15
     16     16
     17     17
     18     18
           1          24          29
      1      1
      2      2
      3      3
      4      4
      5      5
      6      6
      7      7
      8      8
      9      9
     10     10
     11     11
     12     12
     13     13
     14     14
     15     15
     16     16
     17     17
     18     18
           1          24          30
      1      1
      2      2
      3      3
      4      4
      5      5
      6      6
      7      7
      8      8
      9      9
     10     10
     11     11
     12     12
     13     13
     14     14
     15     15
     16     16
     17     17
     18     18
           1          24          31
      1      1
      2      2
      3      3
      4      4
      5      5
      6      6
      7      7
      8      8
      9      9
     10     10
     11     11
     12     12
     13     13
     14     14
     15     15
     16     16
     17     17
     18     18
           1          24          32
      1      1
      2      2
      3      3
      4      4
      5      5
      6      6
      7      7
      8      8
      9      9
     10     10
     11     11
     12     12
     13     13
     14     14
     15     15
     16     16
     17     17
     18     18
           1          25           1
      1      1
      2      2
      3      3
      4      4
      5      5
      6      6
      7      7
      8      8
      9      9
     10     10
     11     11
     12     12
     13     13
     14     14
     15     15
     16     16
     17     17
     18     18
           1          25           2
      1      1
      2      2
      3      3
      4      4
      5      5
      6      6
      7      7
      8      8
      9      9
     10     10
     11     11
     12     12
     13     13
     14     14
     15     15
     16     16
     17     17
     18     18
           1          25           3
      1      1
      2      2
      3      3
      4      4
      5      5
      6      6
      7      7
      8      8
      9      9
     10     10
     11     11
     12     12
     13     13
     14     14
     15     15
     16     16
     17     17
     18     18
           1          25           4
      1      1
      2      2
      3      3
      4      4
      5      5
      6      6
      7      7
      8      8
      9      9
     10     10
     11     11
     12     12
     13     13
     14     14
     15     15
     16     16
     17     17
     18     18
           1          25           5
      1      1
      2      2
      3      3
      4      4
      5      5
      6      6
      7      7
      8      8
      9      9
     10     10
     11     11
     12     12
     13     13
     14     14
     15     15
     16     16
     17     17
     18     18
           1          25           6
      1      1
      2      2
      3      3
      4      4
      5      5
      6      6
      7      7
      8      8
      9      9
     10     10
     11     11
     12     12
     13     13
     14     14
     15     15
     16     16
     17     17
     18     18
           1          25           7
      1      1
      2      2
      3      3
      4      4
      5      5
      6      6
      7      7
      8      8
      9      9
     10     10
     11     11
     12     12
     13     13
     14     14
     15     15
     16     16
     17     17
     18     18
           1          25           8
      1      1
      2      2
      3      3
      4      4
      5      5
      6      6
      7      7
      8      8
      9      9
     10     10
     11     11
     12     12
     13     13
     14     14
     15     15
     16     16
     17     17
     18     18
           1          25           9
      1      1
      2      2
      3      3
      4      4
      5      5
      6      6
      7      7
      8      8
      9      9
     10     10
     11     11
     12     12
     13     13
     14     14
     15     15
     16     16
     17     17
     18     18
           1          25          10
      1      1
      2      2
      3      3
      4      4
      5      5
      6      6
      7      7
      8      8
      9      9
     10     10
     11     11
     12     12
     13     13
     14     14
     15     15
     16     16
     17     17
     18     18
           1          25          11
      1      1
      2      2
      3      3
      4      4
      5      5
      6      6
      7      7
      8      8
      9      9
     10     10
     11     11
     12     12
     13     13
     14     14
     15     15
     16     16
     17     17
     18     18
           1          25          12
      1      1
      2      2
      3      3
      4      4
      5      5
      6      6
      7      7
      8      8
      9      9
     10     10
     11     11
     12     12
     13     13
     14     14
     15     15
     16     16
     17     17
     18     18
           1          25          13
      1      1
      2      2
      3      3
      4      4
      5      5
      6      6
      7      7
      8      8
      9      9
     10     10
     11     11
     12     12
     13     13
     14     14
     15     15
     16     16
     17     17
     18     18
           1          25          14
      1      1
      2      2
      3      3
      4      4
      5      5
      6      6
      7      7
      8      8
      9      9
     10     10
     11     11
     12     12
     13     13
     14     14
     15     15
     16     16
     17     17
     18     18
           1          25          15
      1      1
      2      2
      3      3
      4      4
      5      5
      6      6
      7      7
      8      8
      9      9
     10     10
     11     11
     12     12
     13     13
     14     14
     15     15
     16     16
     17     17
     18     18
           1          25          16
      1      1
      2      2
      3      3
      4      4
      5      5
      6      6
      7      7
      8      8
      9      9
     10     10
     11     11
     12     12
     13     13
     14     14
     15     15
     16     16
     17     17
     18     18
           1          25          17
      1      1
      2      2
      3      3
      4      4
      5      5
      6      6
      7      7
      8      8
      9      9
     10     10
     11     11
     12     12
     13     13
     14     14
     15     15
     16     16
     17     17
     18     18
           1          25          18
      1      1
      2      2
      3      3
      4      4
      5      5
      6      6
      7      7
      8      8
      9      9
     10     10
     11     11
     12     12
     13     13
     14     14
     15     15
     16     16
     17     17
     18     18
           1          25          19
      1      1
      2      2
      3      3
      4      4
      5      5
      6      6
      7      7
      8      8
      9      9
     10     10
     11     11
     12     12
     13     13
     14     14
     15     15
     16     16
     17     17
     18     18
           1          25          20
      1      1
      2      2
      3      3
      4      4
      5      5
      6      6
      7      7
      8      8
      9      9
     10     10
     11     11
     12     12
     13     13
     14     14
     15     15
     16     16
     17     17
     18     18
           1          25          21
      1      1
      2      2
      3      3
      4      4
      5      5
      6      6
      7      7
      8      8
      9      9
     10     10
     11     11
     12     12
     13     13
     14     14
     15     15
     16     16
     17     17
     18     18
           1          25          22
      1      1
      2      2
      3      3
      4      4
      5      5
      6      6
      7      7
      8      8
      9      9
     10     10
     11     11
     12     12
     13     13
     14     14
     15     15
     16     16
     17     17
     18     18
           1          25          23
      1      1
      2      2
      3      3
      4      4
      5      5
      6      6
      7      7
      8      8
      9      9
     10     10
     11     11
     12     12
     13     13
     14     14
     15     15
     16     16
     17     17
     18     18
           1          25          24
      1      1
      2      2
      3      3
      4      4
      5      5
      6      6
      7      7
      8      8
      9      9
     10     10
     11     11
     12     12
     13     13
     14     14
     15     15
     16     16
     17     17
     18     18
           1          25          25
      1      1
      2      2
      3      3
      4      4
      5      5
      6      6
      7      7
      8      8
      9      9
     10     10
     11     11
     12     12
     13     13
     14     14
     15     15
     16     16
     17     17
     18     18
           1          25          26
      1      1
      2      2
      3      3
      4      4
      5      5
      6      6
      7      7
      8      8
      9      9
     10     10
     11     11
     12     12
     13     13
     14     14
     15     15
     16     16
     17     17
     18     18
           1          25          27
      1      1
      2      2
      3      3
      4      4
      5      5
      6      6
      7      7
      8      8
      9      9
     10     10
     11     11
     12     12
     13     13
     14     14
     15     15
     16     16
     17     17
     18     18
           1          25          28
      1      1
      2      2
      3      3
      4      4
      5      5
      6      6
      7      7
      8      8
      9      9
     10     10
     11     11
     12     12
     13     13
     14     14
     15     15
     16     16
     17     17
     18     18
           1          25          29
      1      1
      2      2
      3      3
      4      4
      5      5
      6      6
      7      7
      8      8
      9      9
     10     10
     11     11
     12     12
     13     13
     14     14
     15     15
     16     16
     17     17
     18     18
           1          25          30
      1      1
      2      2
      3      3
      4      4
      5      5
      6      6
      7      7
      8      8
      9      9
     10     10
     11     11
     12     12
     13     13
     14     14
     15     15
     16     16
     17     17
     18     18
           1          25          31
      1      1
      2      2
      3      3
      4      4
      5      5
      6      6
      7      7
      8      8
      9      9
     10     10
     11     11
     12     12
     13     13
     14     14
     15     15
     16     16
     17     17
     18     18
           1          25          32
      1      1
      2      2
      3      3
      4      4
      5      5
      6      6
      7      7
      8      8
      9      9
     10     10
     11     11
     12     12
     13     13
     14     14
     15     15
     16     16
     17     17
     18     18
           1          26           1
      1      1
      2      2
      3      3
      4      4
      5      5
      6      6
      7      7
      8      8
      9      9
     10     10
     11     11
     12     12
     13     13
     14     14
     15     15
     16     16
     17     17
     18     18
           1          26           2
      1      1
      2      2
      3      3
      4      4
      5      5
      6      6
      7      7
      8      8
      9      9
     10     10
     11     11
     12     12
     13     13
     14     14
     15     15
     16     16
     17     17
     18     18
           1          26           3
      1      1
      2      2
      3      3
      4      4
      5      5
      6      6
      7      7
      8      8
      9      9
     10     10
     11     11
     12     12
     13     13
     14     14
     15     15
     16     16
     17     17
     18     18
           1          26           4
      1      1
      2      2
      3      3
      4      4
      5      5
      6      6
      7      7
      8      8
      9      9
     10     10
     11     11
     12     12
     13     13
     14     14
     15     15
     16     16
     17     17
     18     18
           1          26           5
      1      1
      2      2
      3      3
      4      4
      5      5
      6      6
      7      7
      8      8
      9      9
     10     10
     11     11
     12     12
     13     13
     14     14
     15     15
     16     16
     17     17
     18     18
           1          26           6
      1      1
      2      2
      3      3
      4      4
      5      5
      6      6
      7      7
      8      8
      9      9
     10     10
     11     11
     12     12
     13     13
     14     14
     15     15
     16     16
     17     17
     18     18
           1          26           7
      1      1
      2      2
      3      3
      4      4
      5      5
      6      6
      7      7
      8      8
      9      9
     10     10
     11     11
     12     12
     13     13
     14     14
     15     15
     16     16
     17     17
     18     18
           1          26           8
      1      1
      2      2
      3      3
      4      4
      5      5
      6      6
      7      7
      8      8
      9      9
     10     10
     11     11
     12     12
     13     13
     14     14
     15     15
     16     16
     17     17
     18     18
           1          26           9
      1      1
      2      2
      3      3
      4      4
      5      5
      6      6
      7      7
      8      8
      9      9
     10     10
     11     11
     12     12
     13     13
     14     14
     15     15
     16     16
     17     17
     18     18
           1          26          10
      1      1
      2      2
      3      3
      4      4
      5      5
      6      6
      7      7
      8      8
      9      9
     10     10
     11     11
     12     12
     13     13
     14     14
     15     15
     16     16
     17     17
     18     18
           1          26          11
      1      1
      2      2
      3      3
      4      4
      5      5
      6      6
      7      7
      8      8
      9      9
     10     10
     11     11
     12     12
     13     13
     14     14
     15     15
     16     16
     17     17
     18     18
           1          26          12
      1      1
      2      2
      3      3
      4      4
      5      5
      6      6
      7      7
      8      8
      9      9
     10     10
     11     11
     12     12
     13     13
     14     14
     15     15
     16     16
     17     17
     18     18
           1          26          13
      1      1
      2      2
      3      3
      4      4
      5      5
      6      6
      7      7
      8      8
      9      9
     10     10
     11     11
     12     12
     13     13
     14     14
     15     15
     16     16
     17     17
     18     18
           1          26          14
      1      1
      2      2
      3      3
      4      4
      5      5
      6      6
      7      7
      8      8
      9      9
     10     10
     11     11
     12     12
     13     13
     14     14
     15     15
     16     16
     17     17
     18     18
           1          26          15
      1      1
      2      2
      3      3
      4      4
      5      5
      6      6
      7      7
      8      8
      9      9
     10     10
     11     11
     12     12
     13     13
     14     14
     15     15
     16     16
     17     17
     18     18
           1          26          16
      1      1
      2      2
      3      3
      4      4
      5      5
      6      6
      7      7
      8      8
      9      9
     10     10
     11     11
     12     12
     13     13
     14     14
     15     15
     16     16
     17     17
     18     18
           1          26          17
      1      1
      2      2
      3      3
      4      4
      5      5
      6      6
      7      7
      8      8
      9      9
     10     10
     11     11
     12     12
     13     13
     14     14
     15     15
     16     16
     17     17
     18     18
           1          26          18
      1      1
      2      2
      3      3
      4      4
      5      5
      6      6
      7      7
      8      8
      9      9
     10     10
     11     11
     12     12
     13     13
     14     14
     15     15
     16     16
     17     17
     18     18
           1          26          19
      1      1
      2      2
      3      3
      4      4
      5      5
      6      6
      7      7
      8      8
      9      9
     10     10
     11     11
     12     12
     13     13
     14     14
     15     15
     16     16
     17     17
     18     18
           1          26          20
      1      1
      2      2
      3      3
      4      4
      5      5
      6      6
      7      7
      8      8
      9      9
     10     10
     11     11
     12     12
     13     13
     14     14
     15     15
     16     16
     17     17
     18     18
           1          26          21
      1      1
      2      2
      3      3
      4      4
      5      5
      6      6
      7      7
      8      8
      9      9
     10     10
     11     11
     12     12
     13     13
     14     14
     15     15
     16     16
     17     17
     18     18
           1          26          22
      1      1
      2      2
      3      3
      4      4
      5      5
      6      6
      7      7
      8      8
      9      9
     10     10
     11     11
     12     12
     13     13
     14     14
     15     15
     16     16
     17     17
     18     18
           1          26          23
      1      1
      2      2
      3      3
      4      4
      5      5
      6      6
      7      7
      8      8
      9      9
     10     10
     11     11
     12     12
     13     13
     14     14
     15     15
     16     16
     17     17
     18     18
           1          26          24
      1      1
      2      2
      3      3
      4      4
      5      5
      6      6
      7      7
      8      8
      9      9
     10     10
     11     11
     12     12
     13     13
     14     14
     15     15
     16     16
     17     17
     18     18
           1          26          25
      1      1
      2      2
      3      3
      4      4
      5      5
      6      6
      7      7
      8      8
      9      9
     10     10
     11     11
     12     12
     13     13
     14     14
     15     15
     16     16
     17     17
     18     18
           1          26          26
      1      1
      2      2
      3      3
      4      4
      5      5
      6      6
      7      7
      8      8
      9      9
     10     10
     11     11
     12     12
     13     13
     14     14
     15     15
     16     16
     17     17
     18     18
           1          26          27
      1      1
      2      2
      3      3
      4      4
      5      5
      6      6
      7      7
      8      8
      9      9
     10     10
     11     11
     12     12
     13     13
     14     14
     15     15
     16     16
     17     17
     18     18
           1          26          28
      1      1
      2      2
      3      3
      4      4
      5      5
      6      6
      7      7
      8      8
      9      9
     10     10
     11     11
     12     12
     13     13
     14     14
     15     15
     16     16
     17     17
     18     18
           1          26          29
      1      1
      2      2
      3      3
      4      4
      5      5
      6      6
      7      7
      8      8
      9      9
     10     10
     11     11
     12     12
     13     13
     14     14
     15     15
     16     16
     17     17
     18     18
           1          26          30
      1      1
      2      2
      3      3
      4      4
      5      5
      6      6
      7      7
      8      8
      9      9
     10     10
     11     11
     12     12
     13     13
     14     14
     15     15
     16     16
     17     17
     18     18
           1          26          31
      1      1
      2      2
      3      3
      4      4
      5      5
      6      6
      7      7
      8      8
      9      9
     10     10
     11     11
     12     12
     13     13
     14     14
     15     15
     16     16
     17     17
     18     18
           1          26          32
      1      1
      2      2
      3      3
      4      4
      5      5
      6      6
      7      7
      8      8
      9      9
     10     10
     11     11
     12     12
     13     13
     14     14
     15     15
     16     16
     17     17
     18     18
           1          27           1
      1      1
      2      2
      3      3
      4      4
      5      5
      6      6
      7      7
      8      8
      9      9
     10     10
     11     11
     12     12
     13     13
     14     14
     15     15
     16     16
     17     17
     18     18
           1          27           2
      1      1
      2      2
      3      3
      4      4
      5      5
      6      6
      7      7
      8      8
      9      9
     10     10
     11     11
     12     12
     13     13
     14     14
     15     15
     16     16
     17     17
     18     18
           1          27           3
      1      1
      2      2
      3      3
      4      4
      5      5
      6      6
      7      7
      8      8
      9      9
     10     10
     11     11
     12     12
     13     13
     14     14
     15     15
     16     16
     17     17
     18     18
           1          27           4
      1      1
      2      2
      3      3
      4      4
      5      5
      6      6
      7      7
      8      8
      9      9
     10     10
     11     11
     12     12
     13     13
     14     14
     15     15
     16     16
     17     17
     18     18
           1          27           5
      1      1
      2      2
      3      3
      4      4
      5      5
      6      6
      7      7
      8      8
      9      9
     10     10
     11     11
     12     12
     13     13
     14     14
     15     15
     16     16
     17     17
     18     18
           1          27           6
      1      1
      2      2
      3      3
      4      4
      5      5
      6      6
      7      7
      8      8
      9      9
     10     10
     11     11
     12     12
     13     13
     14     14
     15     15
     16     16
     17     17
     18     18
           1          27           7
      1      1
      2      2
      3      3
      4      4
      5      5
      6      6
      7      7
      8      8
      9      9
     10     10
     11     11
     12     12
     13     13
     14     14
     15     15
     16     16
     17     17
     18     18
           1          27           8
      1      1
      2      2
      3      3
      4      4
      5      5
      6      6
      7      7
      8      8
      9      9
     10     10
     11     11
     12     12
     13     13
     14     14
     15     15
     16     16
     17     17
     18     18
           1          27           9
      1      1
      2      2
      3      3
      4      4
      5      5
      6      6
      7      7
      8      8
      9      9
     10     10
     11     11
     12     12
     13     13
     14     14
     15     15
     16     16
     17     17
     18     18
           1          27          10
      1      1
      2      2
      3      3
      4      4
      5      5
      6      6
      7      7
      8      8
      9      9
     10     10
     11     11
     12     12
     13     13
     14     14
     15     15
     16     16
     17     17
     18     18
           1          27          11
      1      1
      2      2
      3      3
      4      4
      5      5
      6      6
      7      7
      8      8
      9      9
     10     10
     11     11
     12     12
     13     13
     14     14
     15     15
     16     16
     17     17
     18     18
           1          27          12
      1      1
      2      2
      3      3
      4      4
      5      5
      6      6
      7      7
      8      8
      9      9
     10     10
     11     11
     12     12
     13     13
     14     14
     15     15
     16     16
     17     17
     18     18
           1          27          13
      1      1
      2      2
      3      3
      4      4
      5      5
      6      6
      7      7
      8      8
      9      9
     10     10
     11     11
     12     12
     13     13
     14     14
     15     15
     16     16
     17     17
     18     18
           1          27          14
      1      1
      2      2
      3      3
      4      4
      5      5
      6      6
      7      7
      8      8
      9      9
     10     10
     11     11
     12     12
     13     13
     14     14
     15     15
     16     16
     17     17
     18     18
           1          27          15
      1      1
      2      2
      3      3
      4      4
      5      5
      6      6
      7      7
      8      8
      9      9
     10     10
     11     11
     12     12
     13     13
     14     14
     15     15
     16     16
     17     17
     18     18
           1          27          16
      1      1
      2      2
      3      3
      4      4
      5      5
      6      6
      7      7
      8      8
      9      9
     10     10
     11     11
     12     12
     13     13
     14     14
     15     15
     16     16
     17     17
     18     18
           1          27          17
      1      1
      2      2
      3      3
      4      4
      5      5
      6      6
      7      7
      8      8
      9      9
     10     10
     11     11
     12     12
     13     13
     14     14
     15     15
     16     16
     17     17
     18     18
           1          27          18
      1      1
      2      2
      3      3
      4      4
      5      5
      6      6
      7      7
      8      8
      9      9
     10     10
     11     11
     12     12
     13     13
     14     14
     15     15
     16     16
     17     17
     18     18
           1          27          19
      1      1
      2      2
      3      3
      4      4
      5      5
      6      6
      7      7
      8      8
      9      9
     10     10
     11     11
     12     12
     13     13
     14     14
     15     15
     16     16
     17     17
     18     18
           1          27          20
      1      1
      2      2
      3      3
      4      4
      5      5
      6      6
      7      7
      8      8
      9      9
     10     10
     11     11
     12     12
     13     13
     14     14
     15     15
     16     16
     17     17
     18     18
           1          27          21
      1      1
      2      2
      3      3
      4      4
      5      5
      6      6
      7      7
      8      8
      9      9
     10     10
     11     11
     12     12
     13     13
     14     14
     15     15
     16     16
     17     17
     18     18
           1          27          22
      1      1
      2      2
      3      3
      4      4
      5      5
      6      6
      7      7
      8      8
      9      9
     10     10
     11     11
     12     12
     13     13
     14     14
     15     15
     16     16
     17     17
     18     18
           1          27          23
      1      1
      2      2
      3      3
      4      4
      5      5
      6      6
      7      7
      8      8
      9      9
     10     10
     11     11
     12     12
     13     13
     14     14
     15     15
     16     16
     17     17
     18     18
           1          27          24
      1      1
      2      2
      3      3
      4      4
      5      5
      6      6
      7      7
      8      8
      9      9
     10     10
     11     11
     12     12
     13     13
     14     14
     15     15
     16     16
     17     17
     18     18
           1          27          25
      1      1
      2      2
      3      3
      4      4
      5      5
      6      6
      7      7
      8      8
      9      9
     10     10
     11     11
     12     12
     13     13
     14     14
     15     15
     16     16
     17     17
     18     18
           1          27          26
      1      1
      2      2
      3      3
      4      4
      5      5
      6      6
      7      7
      8      8
      9      9
     10     10
     11     11
     12     12
     13     13
     14     14
     15     15
     16     16
     17     17
     18     18
           1          27          27
      1      1
      2      2
      3      3
      4      4
      5      5
      6      6
      7      7
      8      8
      9      9
     10     10
     11     11
     12     12
     13     13
     14     14
     15     15
     16     16
     17     17
     18     18
           1          27          28
      1      1
      2      2
      3      3
      4      4
      5      5
      6      6
      7      7
      8      8
      9      9
     10     10
     11     11
     12     12
     13     13
     14     14
     15     15
     16     16
     17     17
     18     18
           1          27          29
      1      1
      2      2
      3      3
      4      4
      5      5
      6      6
      7      7
      8      8
      9      9
     10     10
     11     11
     12     12
     13     13
     14     14
     15     15
     16     16
     17     17
     18     18
           1          27          30
      1      1
      2      2
      3      3
      4      4
      5      5
      6      6
      7      7
      8      8
      9      9
     10     10
     11     11
     12     12
     13     13
     14     14
     15     15
     16     16
     17     17
     18     18
           1          27          31
      1      1
      2      2
      3      3
      4      4
      5      5
      6      6
      7      7
      8      8
      9      9
     10     10
     11     11
     12     12
     13     13
     14     14
     15     15
     16     16
     17     17
     18     18
           1          27          32
      1      1
      2      2
      3      3
      4      4
      5      5
      6      6
      7      7
      8      8
      9      9
     10     10
     11     11
     12     12
     13     13
     14     14
     15     15
     16     16
     17     17
     18     18
           1          28           1
      1      1
      2      2
      3      3
      4      4
      5      5
      6      6
      7      7
      8      8
      9      9
     10     10
     11     11
     12     12
     13     13
     14     14
     15     15
     16     16
     17     17
     18     18
           1          28           2
      1      1
      2      2
      3      3
      4      4
      5      5
      6      6
      7      7
      8      8
      9      9
     10     10
     11     11
     12     12
     13     13
     14     14
     15     15
     16     16
     17     17
     18     18
           1          28           3
      1      1
      2      2
      3      3
      4      4
      5      5
      6      6
      7      7
      8      8
      9      9
     10     10
     11     11
     12     12
     13     13
     14     14
     15     15
     16     16
     17     17
     18     18
           1          28           4
      1      1
      2      2
      3      3
      4      4
      5      5
      6      6
      7      7
      8      8
      9      9
     10     10
     11     11
     12     12
     13     13
     14     14
     15     15
     16     16
     17     17
     18     18
           1          28           5
      1      1
      2      2
      3      3
      4      4
      5      5
      6      6
      7      7
      8      8
      9      9
     10     10
     11     11
     12     12
     13     13
     14     14
     15     15
     16     16
     17     17
     18     18
           1          28           6
      1      1
      2      2
      3      3
      4      4
      5      5
      6      6
      7      7
      8      8
      9      9
     10     10
     11     11
     12     12
     13     13
     14     14
     15     15
     16     16
     17     17
     18     18
           1          28           7
      1      1
      2      2
      3      3
      4      4
      5      5
      6      6
      7      7
      8      8
      9      9
     10     10
     11     11
     12     12
     13     13
     14     14
     15     15
     16     16
     17     17
     18     18
           1          28           8
      1      1
      2      2
      3      3
      4      4
      5      5
      6      6
      7      7
      8      8
      9      9
     10     10
     11     11
     12     12
     13     13
     14     14
     15     15
     16     16
     17     17
     18     18
           1          28           9
      1      1
      2      2
      3      3
      4      4
      5      5
      6      6
      7      7
      8      8
      9      9
     10     10
     11     11
     12     12
     13     13
     14     14
     15     15
     16     16
     17     17
     18     18
           1          28          10
      1      1
      2      2
      3      3
      4      4
      5      5
      6      6
      7      7
      8      8
      9      9
     10     10
     11     11
     12     12
     13     13
     14     14
     15     15
     16     16
     17     17
     18     18
           1          28          11
      1      1
      2      2
      3      3
      4      4
      5      5
      6      6
      7      7
      8      8
      9      9
     10     10
     11     11
     12     12
     13     13
     14     14
     15     15
     16     16
     17     17
     18     18
           1          28          12
      1      1
      2      2
      3      3
      4      4
      5      5
      6      6
      7      7
      8      8
      9      9
     10     10
     11     11
     12     12
     13     13
     14     14
     15     15
     16     16
     17     17
     18     18
           1          28          13
      1      1
      2      2
      3      3
      4      4
      5      5
      6      6
      7      7
      8      8
      9      9
     10     10
     11     11
     12     12
     13     13
     14     14
     15     15
     16     16
     17     17
     18     18
           1          28          14
      1      1
      2      2
      3      3
      4      4
      5      5
      6      6
      7      7
      8      8
      9      9
     10     10
     11     11
     12     12
     13     13
     14     14
     15     15
     16     16
     17     17
     18     18
           1          28          15
      1      1
      2      2
      3      3
      4      4
      5      5
      6      6
      7      7
      8      8
      9      9
     10     10
     11     11
     12     12
     13     13
     14     14
     15     15
     16     16
     17     17
     18     18
           1          28          16
      1      1
      2      2
      3      3
      4      4
      5      5
      6      6
      7      7
      8      8
      9      9
     10     10
     11     11
     12     12
     13     13
     14     14
     15     15
     16     16
     17     17
     18     18
           1          28          17
      1      1
      2      2
      3      3
      4      4
      5      5
      6      6
      7      7
      8      8
      9      9
     10     10
     11     11
     12     12
     13     13
     14     14
     15     15
     16     16
     17     17
     18     18
           1          28          18
      1      1
      2      2
      3      3
      4      4
      5      5
      6      6
      7      7
      8      8
      9      9
     10     10
     11     11
     12     12
     13     13
     14     14
     15     15
     16     16
     17     17
     18     18
           1          28          19
      1      1
      2      2
      3      3
      4      4
      5      5
      6      6
      7      7
      8      8
      9      9
     10     10
     11     11
     12     12
     13     13
     14     14
     15     15
     16     16
     17     17
     18     18
           1          28          20
      1      1
      2      2
      3      3
      4      4
      5      5
      6      6
      7      7
      8      8
      9      9
     10     10
     11     11
     12     12
     13     13
     14     14
     15     15
     16     16
     17     17
     18     18
           1          28          21
      1      1
      2      2
      3      3
      4      4
      5      5
      6      6
      7      7
      8      8
      9      9
     10     10
     11     11
     12     12
     13     13
     14     14
     15     15
     16     16
     17     17
     18     18
           1          28          22
      1      1
      2      2
      3      3
      4      4
      5      5
      6      6
      7      7
      8      8
      9      9
     10     10
     11     11
     12     12
     13     13
     14     14
     15     15
     16     16
     17     17
     18     18
           1          28          23
      1      1
      2      2
      3      3
      4      4
      5      5
      6      6
      7      7
      8      8
      9      9
     10     10
     11     11
     12     12
     13     13
     14     14
     15     15
     16     16
     17     17
     18     18
           1          28          24
      1      1
      2      2
      3      3
      4      4
      5      5
      6      6
      7      7
      8      8
      9      9
     10     10
     11     11
     12     12
     13     13
     14     14
     15     15
     16     16
     17     17
     18     18
           1          28          25
      1      1
      2      2
      3      3
      4      4
      5      5
      6      6
      7      7
      8      8
      9      9
     10     10
     11     11
     12     12
     13     13
     14     14
     15     15
     16     16
     17     17
     18     18
           1          28          26
      1      1
      2      2
      3      3
      4      4
      5      5
      6      6
      7      7
      8      8
      9      9
     10     10
     11     11
     12     12
     13     13
     14     14
     15     15
     16     16
     17     17
     18     18
           1          28          27
      1      1
      2      2
      3      3
      4      4
      5      5
      6      6
      7      7
      8      8
      9      9
     10     10
     11     11
     12     12
     13     13
     14     14
     15     15
     16     16
     17     17
     18     18
           1          28          28
      1      1
      2      2
      3      3
      4      4
      5      5
      6      6
      7      7
      8      8
      9      9
     10     10
     11     11
     12     12
     13     13
     14     14
     15     15
     16     16
     17     17
     18     18
           1          28          29
      1      1
      2      2
      3      3
      4      4
      5      5
      6      6
      7      7
      8      8
      9      9
     10     10
     11     11
     12     12
     13     13
     14     14
     15     15
     16     16
     17     17
     18     18
           1          28          30
      1      1
      2      2
      3      3
      4      4
      5      5
      6      6
      7      7
      8      8
      9      9
     10     10
     11     11
     12     12
     13     13
     14     14
     15     15
     16     16
     17     17
     18     18
           1          28          31
      1      1
      2      2
      3      3
      4      4
      5      5
      6      6
      7      7
      8      8
      9      9
     10     10
     11     11
     12     12
     13     13
     14     14
     15     15
     16     16
     17     17
     18     18
           1          28          32
      1      1
      2      2
      3      3
      4      4
      5      5
      6      6
      7      7
      8      8
      9      9
     10     10
     11     11
     12     12
     13     13
     14     14
     15     15
     16     16
     17     17
     18     18
           1          29           1
      1      1
      2      2
      3      3
      4      4
      5      5
      6      6
      7      7
      8      8
      9      9
     10     10
     11     11
     12     12
     13     13
     14     14
     15     15
     16     16
     17     17
     18     18
           1          29           2
      1      1
      2      2
      3      3
      4      4
      5      5
      6      6
      7      7
      8      8
      9      9
     10     10
     11     11
     12     12
     13     13
     14     14
     15     15
     16     16
     17     17
     18     18
           1          29           3
      1      1
      2      2
      3      3
      4      4
      5      5
      6      6
      7      7
      8      8
      9      9
     10     10
     11     11
     12     12
     13     13
     14     14
     15     15
     16     16
     17     17
     18     18
           1          29           4
      1      1
      2      2
      3      3
      4      4
      5      5
      6      6
      7      7
      8      8
      9      9
     10     10
     11     11
     12     12
     13     13
     14     14
     15     15
     16     16
     17     17
     18     18
           1          29           5
      1      1
      2      2
      3      3
      4      4
      5      5
      6      6
      7      7
      8      8
      9      9
     10     10
     11     11
     12     12
     13     13
     14     14
     15     15
     16     16
     17     17
     18     18
           1          29           6
      1      1
      2      2
      3      3
      4      4
      5      5
      6      6
      7      7
      8      8
      9      9
     10     10
     11     11
     12     12
     13     13
     14     14
     15     15
     16     16
     17     17
     18     18
           1          29           7
      1      1
      2      2
      3      3
      4      4
      5      5
      6      6
      7      7
      8      8
      9      9
     10     10
     11     11
     12     12
     13     13
     14     14
     15     15
     16     16
     17     17
     18     18
           1          29           8
      1      1
      2      2
      3      3
      4      4
      5      5
      6      6
      7      7
      8      8
      9      9
     10     10
     11     11
     12     12
     13     13
     14     14
     15     15
     16     16
     17     17
     18     18
           1          29           9
      1      1
      2      2
      3      3
      4      4
      5      5
      6      6
      7      7
      8      8
      9      9
     10     10
     11     11
     12     12
     13     13
     14     14
     15     15
     16     16
     17     17
     18     18
           1          29          10
      1      1
      2      2
      3      3
      4      4
      5      5
      6      6
      7      7
      8      8
      9      9
     10     10
     11     11
     12     12
     13     13
     14     14
     15     15
     16     16
     17     17
     18     18
           1          29          11
      1      1
      2      2
      3      3
      4      4
      5      5
      6      6
      7      7
      8      8
      9      9
     10     10
     11     11
     12     12
     13     13
     14     14
     15     15
     16     16
     17     17
     18     18
           1          29          12
      1      1
      2      2
      3      3
      4      4
      5      5
      6      6
      7      7
      8      8
      9      9
     10     10
     11     11
     12     12
     13     13
     14     14
     15     15
     16     16
     17     17
     18     18
           1          29          13
      1      1
      2      2
      3      3
      4      4
      5      5
      6      6
      7      7
      8      8
      9      9
     10     10
     11     11
     12     12
     13     13
     14     14
     15     15
     16     16
     17     17
     18     18
           1          29          14
      1      1
      2      2
      3      3
      4      4
      5      5
      6      6
      7      7
      8      8
      9      9
     10     10
     11     11
     12     12
     13     13
     14     14
     15     15
     16     16
     17     17
     18     18
           1          29          15
      1      1
      2      2
      3      3
      4      4
      5      5
      6      6
      7      7
      8      8
      9      9
     10     10
     11     11
     12     12
     13     13
     14     14
     15     15
     16     16
     17     17
     18     18
           1          29          16
      1      1
      2      2
      3      3
      4      4
      5      5
      6      6
      7      7
      8      8
      9      9
     10     10
     11     11
     12     12
     13     13
     14     14
     15     15
     16     16
     17     17
     18     18
           1          29          17
      1      1
      2      2
      3      3
      4      4
      5      5
      6      6
      7      7
      8      8
      9      9
     10     10
     11     11
     12     12
     13     13
     14     14
     15     15
     16     16
     17     17
     18     18
           1          29          18
      1      1
      2      2
      3      3
      4      4
      5      5
      6      6
      7      7
      8      8
      9      9
     10     10
     11     11
     12     12
     13     13
     14     14
     15     15
     16     16
     17     17
     18     18
           1          29          19
      1      1
      2      2
      3      3
      4      4
      5      5
      6      6
      7      7
      8      8
      9      9
     10     10
     11     11
     12     12
     13     13
     14     14
     15     15
     16     16
     17     17
     18     18
           1          29          20
      1      1
      2      2
      3      3
      4      4
      5      5
      6      6
      7      7
      8      8
      9      9
     10     10
     11     11
     12     12
     13     13
     14     14
     15     15
     16     16
     17     17
     18     18
           1          29          21
      1      1
      2      2
      3      3
      4      4
      5      5
      6      6
      7      7
      8      8
      9      9
     10     10
     11     11
     12     12
     13     13
     14     14
     15     15
     16     16
     17     17
     18     18
           1          29          22
      1      1
      2      2
      3      3
      4      4
      5      5
      6      6
      7      7
      8      8
      9      9
     10     10
     11     11
     12     12
     13     13
     14     14
     15     15
     16     16
     17     17
     18     18
           1          29          23
      1      1
      2      2
      3      3
      4      4
      5      5
      6      6
      7      7
      8      8
      9      9
     10     10
     11     11
     12     12
     13     13
     14     14
     15     15
     16     16
     17     17
     18     18
           1          29          24
      1      1
      2      2
      3      3
      4      4
      5      5
      6      6
      7      7
      8      8
      9      9
     10     10
     11     11
     12     12
     13     13
     14     14
     15     15
     16     16
     17     17
     18     18
           1          29          25
      1      1
      2      2
      3      3
      4      4
      5      5
      6      6
      7      7
      8      8
      9      9
     10     10
     11     11
     12     12
     13     13
     14     14
     15     15
     16     16
     17     17
     18     18
           1          29          26
      1      1
      2      2
      3      3
      4      4
      5      5
      6      6
      7      7
      8      8
      9      9
     10     10
     11     11
     12     12
     13     13
     14     14
     15     15
     16     16
     17     17
     18     18
           1          29          27
      1      1
      2      2
      3      3
      4      4
      5      5
      6      6
      7      7
      8      8
      9      9
     10     10
     11     11
     12     12
     13     13
     14     14
     15     15
     16     16
     17     17
     18     18
           1          29          28
      1      1
      2      2
      3      3
      4      4
      5      5
      6      6
      7      7
      8      8
      9      9
     10     10
     11     11
     12     12
     13     13
     14     14
     15     15
     16     16
     17     17
     18     18
           1          29          29
      1      1
      2      2
      3      3
      4      4
      5      5
      6      6
      7      7
      8      8
      9      9
     10     10
     11     11
     12     12
     13     13
     14     14
     15     15
     16     16
     17     17
     18     18
           1          29          30
      1      1
      2      2
      3      3
      4      4
      5      5
      6      6
      7      7
      8      8
      9      9
     10     10
     11     11
     12     12
     13     13
     14     14
     15     15
     16     16
     17     17
     18     18
           1          29          31
      1      1
      2      2
      3      3
      4      4
      5      5
      6      6
      7      7
      8      8
      9      9
     10     10
     11     11
     12     12
     13     13
     14     14
     15     15
     16     16
     17     17
     18     18
           1          29          32
      1      1
      2      2
      3      3
      4      4
      5      5
      6      6
      7      7
      8      8
      9      9
     10     10
     11     11
     12     12
     13     13
     14     14
     15     15
     16     16
     17     17
     18     18
           1          30           1
      1      1
      2      2
      3      3
      4      4
      5      5
      6      6
      7      7
      8      8
      9      9
     10     10
     11     11
     12     12
     13     13
     14     14
     15     15
     16     16
     17     17
     18     18
           1          30           2
      1      1
      2      2
      3      3
      4      4
      5      5
      6      6
      7      7
      8      8
      9      9
     10     10
     11     11
     12     12
     13     13
     14     14
     15     15
     16     16
     17     17
     18     18
           1          30           3
      1      1
      2      2
      3      3
      4      4
      5      5
      6      6
      7      7
      8      8
      9      9
     10     10
     11     11
     12     12
     13     13
     14     14
     15     15
     16     16
     17     17
     18     18
           1          30           4
      1      1
      2      2
      3      3
      4      4
      5      5
      6      6
      7      7
      8      8
      9      9
     10     10
     11     11
     12     12
     13     13
     14     14
     15     15
     16     16
     17     17
     18     18
           1          30           5
      1      1
      2      2
      3      3
      4      4
      5      5
      6      6
      7      7
      8      8
      9      9
     10     10
     11     11
     12     12
     13     13
     14     14
     15     15
     16     16
     17     17
     18     18
           1          30           6
      1      1
      2      2
      3      3
      4      4
      5      5
      6      6
      7      7
      8      8
      9      9
     10     10
     11     11
     12     12
     13     13
     14     14
     15     15
     16     16
     17     17
     18     18
           1          30           7
      1      1
      2      2
      3      3
      4      4
      5      5
      6      6
      7      7
      8      8
      9      9
     10     10
     11     11
     12     12
     13     13
     14     14
     15     15
     16     16
     17     17
     18     18
           1          30           8
      1      1
      2      2
      3      3
      4      4
      5      5
      6      6
      7      7
      8      8
      9      9
     10     10
     11     11
     12     12
     13     13
     14     14
     15     15
     16     16
     17     17
     18     18
           1          30           9
      1      1
      2      2
      3      3
      4      4
      5      5
      6      6
      7      7
      8      8
      9      9
     10     10
     11     11
     12     12
     13     13
     14     14
     15     15
     16     16
     17     17
     18     18
           1          30          10
      1      1
      2      2
      3      3
      4      4
      5      5
      6      6
      7      7
      8      8
      9      9
     10     10
     11     11
     12     12
     13     13
     14     14
     15     15
     16     16
     17     17
     18     18
           1          30          11
      1      1
      2      2
      3      3
      4      4
      5      5
      6      6
      7      7
      8      8
      9      9
     10     10
     11     11
     12     12
     13     13
     14     14
     15     15
     16     16
     17     17
     18     18
           1          30          12
      1      1
      2      2
      3      3
      4      4
      5      5
      6      6
      7      7
      8      8
      9      9
     10     10
     11     11
     12     12
     13     13
     14     14
     15     15
     16     16
     17     17
     18     18
           1          30          13
      1      1
      2      2
      3      3
      4      4
      5      5
      6      6
      7      7
      8      8
      9      9
     10     10
     11     11
     12     12
     13     13
     14     14
     15     15
     16     16
     17     17
     18     18
           1          30          14
      1      1
      2      2
      3      3
      4      4
      5      5
      6      6
      7      7
      8      8
      9      9
     10     10
     11     11
     12     12
     13     13
     14     14
     15     15
     16     16
     17     17
     18     18
           1          30          15
      1      1
      2      2
      3      3
      4      4
      5      5
      6      6
      7      7
      8      8
      9      9
     10     10
     11     11
     12     12
     13     13
     14     14
     15     15
     16     16
     17     17
     18     18
           1          30          16
      1      1
      2      2
      3      3
      4      4
      5      5
      6      6
      7      7
      8      8
      9      9
     10     10
     11     11
     12     12
     13     13
     14     14
     15     15
     16     16
     17     17
     18     18
           1          30          17
      1      1
      2      2
      3      3
      4      4
      5      5
      6      6
      7      7
      8      8
      9      9
     10     10
     11     11
     12     12
     13     13
     14     14
     15     15
     16     16
     17     17
     18     18
           1          30          18
      1      1
      2      2
      3      3
      4      4
      5      5
      6      6
      7      7
      8      8
      9      9
     10     10
     11     11
     12     12
     13     13
     14     14
     15     15
     16     16
     17     17
     18     18
           1          30          19
      1      1
      2      2
      3      3
      4      4
      5      5
      6      6
      7      7
      8      8
      9      9
     10     10
     11     11
     12     12
     13     13
     14     14
     15     15
     16     16
     17     17
     18     18
           1          30          20
      1      1
      2      2
      3      3
      4      4
      5      5
      6      6
      7      7
      8      8
      9      9
     10     10
     11     11
     12     12
     13     13
     14     14
     15     15
     16     16
     17     17
     18     18
           1          30          21
      1      1
      2      2
      3      3
      4      4
      5      5
      6      6
      7      7
      8      8
      9      9
     10     10
     11     11
     12     12
     13     13
     14     14
     15     15
     16     16
     17     17
     18     18
           1          30          22
      1      1
      2      2
      3      3
      4      4
      5      5
      6      6
      7      7
      8      8
      9      9
     10     10
     11     11
     12     12
     13     13
     14     14
     15     15
     16     16
     17     17
     18     18
           1          30          23
      1      1
      2      2
      3      3
      4      4
      5      5
      6      6
      7      7
      8      8
      9      9
     10     10
     11     11
     12     12
     13     13
     14     14
     15     15
     16     16
     17     17
     18     18
           1          30          24
      1      1
      2      2
      3      3
      4      4
      5      5
      6      6
      7      7
      8      8
      9      9
     10     10
     11     11
     12     12
     13     13
     14     14
     15     15
     16     16
     17     17
     18     18
           1          30          25
      1      1
      2      2
      3      3
      4      4
      5      5
      6      6
      7      7
      8      8
      9      9
     10     10
     11     11
     12     12
     13     13
     14     14
     15     15
     16     16
     17     17
     18     18
           1          30          26
      1      1
      2      2
      3      3
      4      4
      5      5
      6      6
      7      7
      8      8
      9      9
     10     10
     11     11
     12     12
     13     13
     14     14
     15     15
     16     16
     17     17
     18     18
           1          30          27
      1      1
      2      2
      3      3
      4      4
      5      5
      6      6
      7      7
      8      8
      9      9
     10     10
     11     11
     12     12
     13     13
     14     14
     15     15
     16     16
     17     17
     18     18
           1          30          28
      1      1
      2      2
      3      3
      4      4
      5      5
      6      6
      7      7
      8      8
      9      9
     10     10
     11     11
     12     12
     13     13
     14     14
     15     15
     16     16
     17     17
     18     18
           1          30          29
      1      1
      2      2
      3      3
      4      4
      5      5
      6      6
      7      7
      8      8
      9      9
     10     10
     11     11
     12     12
     13     13
     14     14
     15     15
     16     16
     17     17
     18     18
           1          30          30
      1      1
      2      2
      3      3
      4      4
      5      5
      6      6
      7      7
      8      8
      9      9
     10     10
     11     11
     12     12
     13     13
     14     14
     15     15
     16     16
     17     17
     18     18
           1          30          31
      1      1
      2      2
      3      3
      4      4
      5      5
      6      6
      7      7
      8      8
      9      9
     10     10
     11     11
     12     12
     13     13
     14     14
     15     15
     16     16
     17     17
     18     18
           1          30          32
      1      1
      2      2
      3      3
      4      4
      5      5
      6      6
      7      7
      8      8
      9      9
     10     10
     11     11
     12     12
     13     13
     14     14
     15     15
     16     16
     17     17
     18     18
           1          31           1
      1      1
      2      2
      3      3
      4      4
      5      5
      6      6
      7      7
      8      8
      9      9
     10     10
     11     11
     12     12
     13     13
     14     14
     15     15
     16     16
     17     17
     18     18
           1          31           2
      1      1
      2      2
      3      3
      4      4
      5      5
      6      6
      7      7
      8      8
      9      9
     10     10
     11     11
     12     12
     13     13
     14     14
     15     15
     16     16
     17     17
     18     18
           1          31           3
      1      1
      2      2
      3      3
      4      4
      5      5
      6      6
      7      7
      8      8
      9      9
     10     10
     11     11
     12     12
     13     13
     14     14
     15     15
     16     16
     17     17
     18     18
           1          31           4
      1      1
      2      2
      3      3
      4      4
      5      5
      6      6
      7      7
      8      8
      9      9
     10     10
     11     11
     12     12
     13     13
     14     14
     15     15
     16     16
     17     17
     18     18
           1          31           5
      1      1
      2      2
      3      3
      4      4
      5      5
      6      6
      7      7
      8      8
      9      9
     10     10
     11     11
     12     12
     13     13
     14     14
     15     15
     16     16
     17     17
     18     18
           1          31           6
      1      1
      2      2
      3      3
      4      4
      5      5
      6      6
      7      7
      8      8
      9      9
     10     10
     11     11
     12     12
     13     13
     14     14
     15     15
     16     16
     17     17
     18     18
           1          31           7
      1      1
      2      2
      3      3
      4      4
      5      5
      6      6
      7      7
      8      8
      9      9
     10     10
     11     11
     12     12
     13     13
     14     14
     15     15
     16     16
     17     17
     18     18
           1          31           8
      1      1
      2      2
      3      3
      4      4
      5      5
      6      6
      7      7
      8      8
      9      9
     10     10
     11     11
     12     12
     13     13
     14     14
     15     15
     16     16
     17     17
     18     18
           1          31           9
      1      1
      2      2
      3      3
      4      4
      5      5
      6      6
      7      7
      8      8
      9      9
     10     10
     11     11
     12     12
     13     13
     14     14
     15     15
     16     16
     17     17
     18     18
           1          31          10
      1      1
      2      2
      3      3
      4      4
      5      5
      6      6
      7      7
      8      8
      9      9
     10     10
     11     11
     12     12
     13     13
     14     14
     15     15
     16     16
     17     17
     18     18
           1          31          11
      1      1
      2      2
      3      3
      4      4
      5      5
      6      6
      7      7
      8      8
      9      9
     10     10
     11     11
     12     12
     13     13
     14     14
     15     15
     16     16
     17     17
     18     18
           1          31          12
      1      1
      2      2
      3      3
      4      4
      5      5
      6      6
      7      7
      8      8
      9      9
     10     10
     11     11
     12     12
     13     13
     14     14
     15     15
     16     16
     17     17
     18     18
           1          31          13
      1      1
      2      2
      3      3
      4      4
      5      5
      6      6
      7      7
      8      8
      9      9
     10     10
     11     11
     12     12
     13     13
     14     14
     15     15
     16     16
     17     17
     18     18
           1          31          14
      1      1
      2      2
      3      3
      4      4
      5      5
      6      6
      7      7
      8      8
      9      9
     10     10
     11     11
     12     12
     13     13
     14     14
     15     15
     16     16
     17     17
     18     18
           1          31          15
      1      1
      2      2
      3      3
      4      4
      5      5
      6      6
      7      7
      8      8
      9      9
     10     10
     11     11
     12     12
     13     13
     14     14
     15     15
     16     16
     17     17
     18     18
           1          31          16
      1      1
      2      2
      3      3
      4      4
      5      5
      6      6
      7      7
      8      8
      9      9
     10     10
     11     11
     12     12
     13     13
     14     14
     15     15
     16     16
     17     17
     18     18
           1          31          17
      1      1
      2      2
      3      3
      4      4
      5      5
      6      6
      7      7
      8      8
      9      9
     10     10
     11     11
     12     12
     13     13
     14     14
     15     15
     16     16
     17     17
     18     18
           1          31          18
      1      1
      2      2
      3      3
      4      4
      5      5
      6      6
      7      7
      8      8
      9      9
     10     10
     11     11
     12     12
     13     13
     14     14
     15     15
     16     16
     17     17
     18     18
           1          31          19
      1      1
      2      2
      3      3
      4      4
      5      5
      6      6
      7      7
      8      8
      9      9
     10     10
     11     11
     12     12
     13     13
     14     14
     15     15
     16     16
     17     17
     18     18
           1          31          20
      1      1
      2      2
      3      3
      4      4
      5      5
      6      6
      7      7
      8      8
      9      9
     10     10
     11     11
     12     12
     13     13
     14     14
     15     15
     16     16
     17     17
     18     18
           1          31          21
      1      1
      2      2
      3      3
      4      4
      5      5
      6      6
      7      7
      8      8
      9      9
     10     10
     11     11
     12     12
     13     13
     14     14
     15     15
     16     16
     17     17
     18     18
           1          31          22
      1      1
      2      2
      3      3
      4      4
      5      5
      6      6
      7      7
      8      8
      9      9
     10     10
     11     11
     12     12
     13     13
     14     14
     15     15
     16     16
     17     17
     18     18
           1          31          23
      1      1
      2      2
      3      3
      4      4
      5      5
      6      6
      7      7
      8      8
      9      9
     10     10
     11     11
     12     12
     13     13
     14     14
     15     15
     16     16
     17     17
     18     18
           1          31          24
      1      1
      2      2
      3      3
      4      4
      5      5
      6      6
      7      7
      8      8
      9      9
     10     10
     11     11
     12     12
     13     13
     14     14
     15     15
     16     16
     17     17
     18     18
           1          31          25
      1      1
      2      2
      3      3
      4      4
      5      5
      6      6
      7      7
      8      8
      9      9
     10     10
     11     11
     12     12
     13     13
     14     14
     15     15
     16     16
     17     17
     18     18
           1          31          26
      1      1
      2      2
      3      3
      4      4
      5      5
      6      6
      7      7
      8      8
      9      9
     10     10
     11     11
     12     12
     13     13
     14     14
     15     15
     16     16
     17     17
     18     18
           1          31          27
      1      1
      2      2
      3      3
      4      4
      5      5
      6      6
      7      7
      8      8
      9      9
     10     10
     11     11
     12     12
     13     13
     14     14
     15     15
     16     16
     17     17
     18     18
           1          31          28
      1      1
      2      2
      3      3
      4      4
      5      5
      6      6
      7      7
      8      8
      9      9
     10     10
     11     11
     12     12
     13     13
     14     14
     15     15
     16     16
     17     17
     18     18
           1          31          29
      1      1
      2      2
      3      3
      4      4
      5      5
      6      6
      7      7
      8      8
      9      9
     10     10
     11     11
     12     12
     13     13
     14     14
     15     15
     16     16
     17     17
     18     18
           1          31          30
      1      1
      2      2
      3      3
      4      4
      5      5
      6      6
      7      7
      8      8
      9      9
     10     10
     11     11
     12     12
     13     13
     14     14
     15     15
     16     16
     17     17
     18     18
           1          31          31
      1      1
      2      2
      3      3
      4      4
      5      5
      6      6
      7      7
      8      8
      9      9
     10     10
     11     11
     12     12
     13     13
     14     14
     15     15
     16     16
     17     17
     18     18
           1          31          32
      1      1
      2      2
      3      3
      4      4
      5      5
      6      6
      7      7
      8      8
      9      9
     10     10
     11     11
     12     12
     13     13
     14     14
     15     15
     16     16
     17     17
     18     18
           1          32           1
      1      1
      2      2
      3      3
      4      4
      5      5
      6      6
      7      7
      8      8
      9      9
     10     10
     11     11
     12     12
     13     13
     14     14
     15     15
     16     16
     17     17
     18     18
           1          32           2
      1      1
      2      2
      3      3
      4      4
      5      5
      6      6
      7      7
      8      8
      9      9
     10     10
     11     11
     12     12
     13     13
     14     14
     15     15
     16     16
     17     17
     18     18
           1          32           3
      1      1
      2      2
      3      3
      4      4
      5      5
      6      6
      7      7
      8      8
      9      9
     10     10
     11     11
     12     12
     13     13
     14     14
     15     15
     16     16
     17     17
     18     18
           1          32           4
      1      1
      2      2
      3      3
      4      4
      5      5
      6      6
      7      7
      8      8
      9      9
     10     10
     11     11
     12     12
     13     13
     14     14
     15     15
     16     16
     17     17
     18     18
           1          32           5
      1      1
      2      2
      3      3
      4      4
      5      5
      6      6
      7      7
      8      8
      9      9
     10     10
     11     11
     12     12
     13     13
     14     14
     15     15
     16     16
     17     17
     18     18
           1          32           6
      1      1
      2      2
      3      3
      4      4
      5      5
      6      6
      7      7
      8      8
      9      9
     10     10
     11     11
     12     12
     13     13
     14     14
     15     15
     16     16
     17     17
     18     18
           1          32           7
      1      1
      2      2
      3      3
      4      4
      5      5
      6      6
      7      7
      8      8
      9      9
     10     10
     11     11
     12     12
     13     13
     14     14
     15     15
     16     16
     17     17
     18     18
           1          32           8
      1      1
      2      2
      3      3
      4      4
      5      5
      6      6
      7      7
      8      8
      9      9
     10     10
     11     11
     12     12
     13     13
     14     14
     15     15
     16     16
     17     17
     18     18
           1          32           9
      1      1
      2      2
      3      3
      4      4
      5      5
      6      6
      7      7
      8      8
      9      9
     10     10
     11     11
     12     12
     13     13
     14     14
     15     15
     16     16
     17     17
     18     18
           1          32          10
      1      1
      2      2
      3      3
      4      4
      5      5
      6      6
      7      7
      8      8
      9      9
     10     10
     11     11
     12     12
     13     13
     14     14
     15     15
     16     16
     17     17
     18     18
           1          32          11
      1      1
      2      2
      3      3
      4      4
      5      5
      6      6
      7      7
      8      8
      9      9
     10     10
     11     11
     12     12
     13     13
     14     14
     15     15
     16     16
     17     17
     18     18
           1          32          12
      1      1
      2      2
      3      3
      4      4
      5      5
      6      6
      7      7
      8      8
      9      9
     10     10
     11     11
     12     12
     13     13
     14     14
     15     15
     16     16
     17     17
     18     18
           1          32          13
      1      1
      2      2
      3      3
      4      4
      5      5
      6      6
      7      7
      8      8
      9      9
     10     10
     11     11
     12     12
     13     13
     14     14
     15     15
     16     16
     17     17
     18     18
           1          32          14
      1      1
      2      2
      3      3
      4      4
      5      5
      6      6
      7      7
      8      8
      9      9
     10     10
     11     11
     12     12
     13     13
     14     14
     15     15
     16     16
     17     17
     18     18
           1          32          15
      1      1
      2      2
      3      3
      4      4
      5      5
      6      6
      7      7
      8      8
      9      9
     10     10
     11     11
     12     12
     13     13
     14     14
     15     15
     16     16
     17     17
     18     18
           1          32          16
      1      1
      2      2
      3      3
      4      4
      5      5
      6      6
      7      7
      8      8
      9      9
     10     10
     11     11
     12     12
     13     13
     14     14
     15     15
     16     16
     17     17
     18     18
           1          32          17
      1      1
      2      2
      3      3
      4      4
      5      5
      6      6
      7      7
      8      8
      9      9
     10     10
     11     11
     12     12
     13     13
     14     14
     15     15
     16     16
     17     17
     18     18
           1          32          18
      1      1
      2      2
      3      3
      4      4
      5      5
      6      6
      7      7
      8      8
      9      9
     10     10
     11     11
     12     12
     13     13
     14     14
     15     15
     16     16
     17     17
     18     18
           1          32          19
      1      1
      2      2
      3      3
      4      4
      5      5
      6      6
      7      7
      8      8
      9      9
     10     10
     11     11
     12     12
     13     13
     14     14
     15     15
     16     16
     17     17
     18     18
           1          32          20
      1      1
      2      2
      3      3
      4      4
      5      5
      6      6
      7      7
      8      8
      9      9
     10     10
     11     11
     12     12
     13     13
     14     14
     15     15
     16     16
     17     17
     18     18
           1          32          21
      1      1
      2      2
      3      3
      4      4
      5      5
      6      6
      7      7
      8      8
      9      9
     10     10
     11     11
     12     12
     13     13
     14     14
     15     15
     16     16
     17     17
     18     18
           1          32          22
      1      1
      2      2
      3      3
      4      4
      5      5
      6      6
      7      7
      8      8
      9      9
     10     10
     11     11
     12     12
     13     13
     14     14
     15     15
     16     16
     17     17
     18     18
           1          32          23
      1      1
      2      2
      3      3
      4      4
      5      5
      6      6
      7      7
      8      8
      9      9
     10     10
     11     11
     12     12
     13     13
     14     14
     15     15
     16     16
     17     17
     18     18
           1          32          24
      1      1
      2      2
      3      3
      4      4
      5      5
      6      6
      7      7
      8      8
      9      9
     10     10
     11     11
     12     12
     13     13
     14     14
     15     15
     16     16
     17     17
     18     18
           1          32          25
      1      1
      2      2
      3      3
      4      4
      5      5
      6      6
      7      7
      8      8
      9      9
     10     10
     11     11
     12     12
     13     13
     14     14
     15     15
     16     16
     17     17
     18     18
           1          32          26
      1      1
      2      2
      3      3
      4      4
      5      5
      6      6
      7      7
      8      8
      9      9
     10     10
     11     11
     12     12
     13     13
     14     14
     15     15
     16     16
     17     17
     18     18
           1          32          27
      1      1
      2      2
      3      3
      4      4
      5      5
      6      6
      7      7
      8      8
      9      9
     10     10
     11     11
     12     12
     13     13
     14     14
     15     15
     16     16
     17     17
     18     18
           1          32          28
      1      1
      2      2
      3      3
      4      4
      5      5
      6      6
      7      7
      8      8
      9      9
     10     10
     11     11
     12     12
     13     13
     14     14
     15     15
     16     16
     17     17
     18     18
           1          32          29
      1      1
      2      2
      3      3
      4      4
      5      5
      6      6
      7      7
      8      8
      9      9
     10     10
     11     11
     12     12
     13     13
     14     14
     15     15
     16     16
     17     17
     18     18
           1          32          30
      1      1
      2      2
      3      3
      4      4
      5      5
      6      6
      7      7
      8      8
      9      9
     10     10
     11     11
     12     12
     13     13
     14     14
     15     15
     16     16
     17     17
     18     18
           1          32          31
      1      1
      2      2
      3      3
      4      4
      5      5
      6      6
      7      7
      8      8
      9      9
     10     10
     11     11
     12     12
     13     13
     14     14
     15     15
     16     16
     17     17
     18     18
           1          32          32
      1      1
      2      2
      3      3
      4      4
      5      5
      6      6
      7      7
      8      8
      9      9
     10     10
     11     11
     12     12
     13     13
     14     14
     15     15
     16     16
     17     17
     18     18
           2           1           1
      1      1
      2      2
      3      3
      4      4
      5      5
      6      6
      7      7
      8      8
      9      9
     10     10
     11     11
     12     12
     13     13
     14     14
     15     15
     16     16
     17     17
     18     18
           2           1           2
      1      1
      2      2
      3      3
      4      4
      5      5
      6      6
      7      7
      8      8
      9      9
     10     10
     11     11
     12     12
     13     13
     14     14
     15     15
     16     16
     17     17
     18     18
           2           1           3
      1      1
      2      2
      3      3
      4      4
      5      5
      6      6
      7      7
      8      8
      9      9
     10     10
     11     11
     12     12
     13     13
     14     14
     15     15
     16     16
     17     17
     18     18
           2           1           4
      1      1
      2      2
      3      3
      4      4
      5      5
      6      6
      7      7
      8      8
      9      9
     10     10
     11     11
     12     12
     13     13
     14     14
     15     15
     16     16
     17     17
     18     18
           2           1           5
      1      1
      2      2
      3      3
      4      4
      5      5
      6      6
      7      7
      8      8
      9      9
     10     10
     11     11
     12     12
     13     13
     14     14
     15     15
     16     16
     17     17
     18     18
           2           1           6
      1      1
      2      2
      3      3
      4      4
      5      5
      6      6
      7      7
      8      8
      9      9
     10     10
     11     11
     12     12
     13     13
     14     14
     15     15
     16     16
     17     17
     18     18
           2           1           7
      1      1
      2      2
      3      3
      4      4
      5      5
      6      6
      7      7
      8      8
      9      9
     10     10
     11     11
     12     12
     13     13
     14     14
     15     15
     16     16
     17     17
     18     18
           2           1           8
      1      1
      2      2
      3      3
      4      4
      5      5
      6      6
      7      7
      8      8
      9      9
     10     10
     11     11
     12     12
     13     13
     14     14
     15     15
     16     16
     17     17
     18     18
           2           1           9
      1      1
      2      2
      3      3
      4      4
      5      5
      6      6
      7      7
      8      8
      9      9
     10     10
     11     11
     12     12
     13     13
     14     14
     15     15
     16     16
     17     17
     18     18
           2           1          10
      1      1
      2      2
      3      3
      4      4
      5      5
      6      6
      7      7
      8      8
      9      9
     10     10
     11     11
     12     12
     13     13
     14     14
     15     15
     16     16
     17     17
     18     18
           2           1          11
      1      1
      2      2
      3      3
      4      4
      5      5
      6      6
      7      7
      8      8
      9      9
     10     10
     11     11
     12     12
     13     13
     14     14
     15     15
     16     16
     17     17
     18     18
           2           1          12
      1      1
      2      2
      3      3
      4      4
      5      5
      6      6
      7      7
      8      8
      9      9
     10     10
     11     11
     12     12
     13     13
     14     14
     15     15
     16     16
     17     17
     18     18
           2           1          13
      1      1
      2      2
      3      3
      4      4
      5      5
      6      6
      7      7
      8      8
      9      9
     10     10
     11     11
     12     12
     13     13
     14     14
     15     15
     16     16
     17     17
     18     18
           2           1          14
      1      1
      2      2
      3      3
      4      4
      5      5
      6      6
      7      7
      8      8
      9      9
     10     10
     11     11
     12     12
     13     13
     14     14
     15     15
     16     16
     17     17
     18     18
           2           1          15
      1      1
      2      2
      3      3
      4      4
      5      5
      6      6
      7      7
      8      8
      9      9
     10     10
     11     11
     12     12
     13     13
     14     14
     15     15
     16     16
     17     17
     18     18
           2           1          16
      1      1
      2      2
      3      3
      4      4
      5      5
      6      6
      7      7
      8      8
      9      9
     10     10
     11     11
     12     12
     13     13
     14     14
     15     15
     16     16
     17     17
     18     18
           2           1          17
      1      1
      2      2
      3      3
      4      4
      5      5
      6      6
      7      7
      8      8
      9      9
     10     10
     11     11
     12     12
     13     13
     14     14
     15     15
     16     16
     17     17
     18     18
           2           1          18
      1      1
      2      2
      3      3
      4      4
      5      5
      6      6
      7      7
      8      8
      9      9
     10     10
     11     11
     12     12
     13     13
     14     14
     15     15
     16     16
     17     17
     18     18
           2           1          19
      1      1
      2      2
      3      3
      4      4
      5      5
      6      6
      7      7
      8      8
      9      9
     10     10
     11     11
     12     12
     13     13
     14     14
     15     15
     16     16
     17     17
     18     18
           2           1          20
      1      1
      2      2
      3      3
      4      4
      5      5
      6      6
      7      7
      8      8
      9      9
     10     10
     11     11
     12     12
     13     13
     14     14
     15     15
     16     16
     17     17
     18     18
           2           1          21
      1      1
      2      2
      3      3
      4      4
      5      5
      6      6
      7      7
      8      8
      9      9
     10     10
     11     11
     12     12
     13     13
     14     14
     15     15
     16     16
     17     17
     18     18
           2           1          22
      1      1
      2      2
      3      3
      4      4
      5      5
      6      6
      7      7
      8      8
      9      9
     10     10
     11     11
     12     12
     13     13
     14     14
     15     15
     16     16
     17     17
     18     18
           2           1          23
      1      1
      2      2
      3      3
      4      4
      5      5
      6      6
      7      7
      8      8
      9      9
     10     10
     11     11
     12     12
     13     13
     14     14
     15     15
     16     16
     17     17
     18     18
           2           1          24
      1      1
      2      2
      3      3
      4      4
      5      5
      6      6
      7      7
      8      8
      9      9
     10     10
     11     11
     12     12
     13     13
     14     14
     15     15
     16     16
     17     17
     18     18
           2           1          25
      1      1
      2      2
      3      3
      4      4
      5      5
      6      6
      7      7
      8      8
      9      9
     10     10
     11     11
     12     12
     13     13
     14     14
     15     15
     16     16
     17     17
     18     18
           2           1          26
      1      1
      2      2
      3      3
      4      4
      5      5
      6      6
      7      7
      8      8
      9      9
     10     10
     11     11
     12     12
     13     13
     14     14
     15     15
     16     16
     17     17
     18     18
           2           1          27
      1      1
      2      2
      3      3
      4      4
      5      5
      6      6
      7      7
      8      8
      9      9
     10     10
     11     11
     12     12
     13     13
     14     14
     15     15
     16     16
     17     17
     18     18
           2           1          28
      1      1
      2      2
      3      3
      4      4
      5      5
      6      6
      7      7
      8      8
      9      9
     10     10
     11     11
     12     12
     13     13
     14     14
     15     15
     16     16
     17     17
     18     18
           2           1          29
      1      1
      2      2
      3      3
      4      4
      5      5
      6      6
      7      7
      8      8
      9      9
     10     10
     11     11
     12     12
     13     13
     14     14
     15     15
     16     16
     17     17
     18     18
           2           1          30
      1      1
      2      2
      3      3
      4      4
      5      5
      6      6
      7      7
      8      8
      9      9
     10     10
     11     11
     12     12
     13     13
     14     14
     15     15
     16     16
     17     17
     18     18
           2           1          31
      1      1
      2      2
      3      3
      4      4
      5      5
      6      6
      7      7
      8      8
      9      9
     10     10
     11     11
     12     12
     13     13
     14     14
     15     15
     16     16
     17     17
     18     18
           2           1          32
      1      1
      2      2
      3      3
      4      4
      5      5
      6      6
      7      7
      8      8
      9      9
     10     10
     11     11
     12     12
     13     13
     14     14
     15     15
     16     16
     17     17
     18     18
           2           2           1
      1      1
      2      2
      3      3
      4      4
      5      5
      6      6
      7      7
      8      8
      9      9
     10     10
     11     11
     12     12
     13     13
     14     14
     15     15
     16     16
     17     17
     18     18
           2           2           2
      1      1
      2      2
      3      3
      4      4
      5      5
      6      6
      7      7
      8      8
      9      9
     10     10
     11     11
     12     12
     13     13
     14     14
     15     15
     16     16
     17     17
     18     18
           2           2           3
      1      1
      2      2
      3      3
      4      4
      5      5
      6      6
      7      7
      8      8
      9      9
     10     10
     11     11
     12     12
     13     13
     14     14
     15     15
     16     16
     17     17
     18     18
           2           2           4
      1      1
      2      2
      3      3
      4      4
      5      5
      6      6
      7      7
      8      8
      9      9
     10     10
     11     11
     12     12
     13     13
     14     14
     15     15
     16     16
     17     17
     18     18
           2           2           5
      1      1
      2      2
      3      3
      4      4
      5      5
      6      6
      7      7
      8      8
      9      9
     10     10
     11     11
     12     12
     13     13
     14     14
     15     15
     16     16
     17     17
     18     18
           2           2           6
      1      1
      2      2
      3      3
      4      4
      5      5
      6      6
      7      7
      8      8
      9      9
     10     10
     11     11
     12     12
     13     13
     14     14
     15     15
     16     16
     17     17
     18     18
           2           2           7
      1      1
      2      2
      3      3
      4      4
      5      5
      6      6
      7      7
      8      8
      9      9
     10     10
     11     11
     12     12
     13     13
     14     14
     15     15
     16     16
     17     17
     18     18
           2           2           8
      1      1
      2      2
      3      3
      4      4
      5      5
      6      6
      7      7
      8      8
      9      9
     10     10
     11     11
     12     12
     13     13
     14     14
     15     15
     16     16
     17     17
     18     18
           2           2           9
      1      1
      2      2
      3      3
      4      4
      5      5
      6      6
      7      7
      8      8
      9      9
     10     10
     11     11
     12     12
     13     13
     14     14
     15     15
     16     16
     17     17
     18     18
           2           2          10
      1      1
      2      2
      3      3
      4      4
      5      5
      6      6
      7      7
      8      8
      9      9
     10     10
     11     11
     12     12
     13     13
     14     14
     15     15
     16     16
     17     17
     18     18
           2           2          11
      1      1
      2      2
      3      3
      4      4
      5      5
      6      6
      7      7
      8      8
      9      9
     10     10
     11     11
     12     12
     13     13
     14     14
     15     15
     16     16
     17     17
     18     18
           2           2          12
      1      1
      2      2
      3      3
      4      4
      5      5
      6      6
      7      7
      8      8
      9      9
     10     10
     11     11
     12     12
     13     13
     14     14
     15     15
     16     16
     17     17
     18     18
           2           2          13
      1      1
      2      2
      3      3
      4      4
      5      5
      6      6
      7      7
      8      8
      9      9
     10     10
     11     11
     12     12
     13     13
     14     14
     15     15
     16     16
     17     17
     18     18
           2           2          14
      1      1
      2      2
      3      3
      4      4
      5      5
      6      6
      7      7
      8      8
      9      9
     10     10
     11     11
     12     12
     13     13
     14     14
     15     15
     16     16
     17     17
     18     18
           2           2          15
      1      1
      2      2
      3      3
      4      4
      5      5
      6      6
      7      7
      8      8
      9      9
     10     10
     11     11
     12     12
     13     13
     14     14
     15     15
     16     16
     17     17
     18     18
           2           2          16
      1      1
      2      2
      3      3
      4      4
      5      5
      6      6
      7      7
      8      8
      9      9
     10     10
     11     11
     12     12
     13     13
     14     14
     15     15
     16     16
     17     17
     18     18
           2           2          17
      1      1
      2      2
      3      3
      4      4
      5      5
      6      6
      7      7
      8      8
      9      9
     10     10
     11     11
     12     12
     13     13
     14     14
     15     15
     16     16
     17     17
     18     18
           2           2          18
      1      1
      2      2
      3      3
      4      4
      5      5
      6      6
      7      7
      8      8
      9      9
     10     10
     11     11
     12     12
     13     13
     14     14
     15     15
     16     16
     17     17
     18     18
           2           2          19
      1      1
      2      2
      3      3
      4      4
      5      5
      6      6
      7      7
      8      8
      9      9
     10     10
     11     11
     12     12
     13     13
     14     14
     15     15
     16     16
     17     17
     18     18
           2           2          20
      1      1
      2      2
      3      3
      4      4
      5      5
      6      6
      7      7
      8      8
      9      9
     10     10
     11     11
     12     12
     13     13
     14     14
     15     15
     16     16
     17     17
     18     18
           2           2          21
      1      1
      2      2
      3      3
      4      4
      5      5
      6      6
      7      7
      8      8
      9      9
     10     10
     11     11
     12     12
     13     13
     14     14
     15     15
     16     16
     17     17
     18     18
           2           2          22
      1      1
      2      2
      3      3
      4      4
      5      5
      6      6
      7      7
      8      8
      9      9
     10     10
     11     11
     12     12
     13     13
     14     14
     15     15
     16     16
     17     17
     18     18
           2           2          23
      1      1
      2      2
      3      3
      4      4
      5      5
      6      6
      7      7
      8      8
      9      9
     10     10
     11     11
     12     12
     13     13
     14     14
     15     15
     16     16
     17     17
     18     18
           2           2          24
      1      1
      2      2
      3      3
      4      4
      5      5
      6      6
      7      7
      8      8
      9      9
     10     10
     11     11
     12     12
     13     13
     14     14
     15     15
     16     16
     17     17
     18     18
           2           2          25
      1      1
      2      2
      3      3
      4      4
      5      5
      6      6
      7      7
      8      8
      9      9
     10     10
     11     11
     12     12
     13     13
     14     14
     15     15
     16     16
     17     17
     18     18
           2           2          26
      1      1
      2      2
      3      3
      4      4
      5      5
      6      6
      7      7
      8      8
      9      9
     10     10
     11     11
     12     12
     13     13
     14     14
     15     15
     16     16
     17     17
     18     18
           2           2          27
      1      1
      2      2
      3      3
      4      4
      5      5
      6      6
      7      7
      8      8
      9      9
     10     10
     11     11
     12     12
     13     13
     14     14
     15     15
     16     16
     17     17
     18     18
           2           2          28
      1      1
      2      2
      3      3
      4      4
      5      5
      6      6
      7      7
      8      8
      9      9
     10     10
     11     11
     12     12
     13     13
     14     14
     15     15
     16     16
     17     17
     18     18
           2           2          29
      1      1
      2      2
      3      3
      4      4
      5      5
      6      6
      7      7
      8      8
      9      9
     10     10
     11     11
     12     12
     13     13
     14     14
     15     15
     16     16
     17     17
     18     18
           2           2          30
      1      1
      2      2
      3      3
      4      4
      5      5
      6      6
      7      7
      8      8
      9      9
     10     10
     11     11
     12     12
     13     13
     14     14
     15     15
     16     16
     17     17
     18     18
           2           2          31
      1      1
      2      2
      3      3
      4      4
      5      5
      6      6
      7      7
      8      8
      9      9
     10     10
     11     11
     12     12
     13     13
     14     14
     15     15
     16     16
     17     17
     18     18
           2           2          32
      1      1
      2      2
      3      3
      4      4
      5      5
      6      6
      7      7
      8      8
      9      9
     10     10
     11     11
     12     12
     13     13
     14     14
     15     15
     16     16
     17     17
     18     18
           2           3           1
      1      1
      2      2
      3      3
      4      4
      5      5
      6      6
      7      7
      8      8
      9      9
     10     10
     11     11
     12     12
     13     13
     14     14
     15     15
     16     16
     17     17
     18     18
           2           3           2
      1      1
      2      2
      3      3
      4      4
      5      5
      6      6
      7      7
      8      8
      9      9
     10     10
     11     11
     12     12
     13     13
     14     14
     15     15
     16     16
     17     17
     18     18
           2           3           3
      1      1
      2      2
      3      3
      4      4
      5      5
      6      6
      7      7
      8      8
      9      9
     10     10
     11     11
     12     12
     13     13
     14     14
     15     15
     16     16
     17     17
     18     18
           2           3           4
      1      1
      2      2
      3      3
      4      4
      5      5
      6      6
      7      7
      8      8
      9      9
     10     10
     11     11
     12     12
     13     13
     14     14
     15     15
     16     16
     17     17
     18     18
           2           3           5
      1      1
      2      2
      3      3
      4      4
      5      5
      6      6
      7      7
      8      8
      9      9
     10     10
     11     11
     12     12
     13     13
     14     14
     15     15
     16     16
     17     17
     18     18
           2           3           6
      1      1
      2      2
      3      3
      4      4
      5      5
      6      6
      7      7
      8      8
      9      9
     10     10
     11     11
     12     12
     13     13
     14     14
     15     15
     16     16
     17     17
     18     18
           2           3           7
      1      1
      2      2
      3      3
      4      4
      5      5
      6      6
      7      7
      8      8
      9      9
     10     10
     11     11
     12     12
     13     13
     14     14
     15     15
     16     16
     17     17
     18     18
           2           3           8
      1      1
      2      2
      3      3
      4      4
      5      5
      6      6
      7      7
      8      8
      9      9
     10     10
     11     11
     12     12
     13     13
     14     14
     15     15
     16     16
     17     17
     18     18
           2           3           9
      1      1
      2      2
      3      3
      4      4
      5      5
      6      6
      7      7
      8      8
      9      9
     10     10
     11     11
     12     12
     13     13
     14     14
     15     15
     16     16
     17     17
     18     18
           2           3          10
      1      1
      2      2
      3      3
      4      4
      5      5
      6      6
      7      7
      8      8
      9      9
     10     10
     11     11
     12     12
     13     13
     14     14
     15     15
     16     16
     17     17
     18     18
           2           3          11
      1      1
      2      2
      3      3
      4      4
      5      5
      6      6
      7      7
      8      8
      9      9
     10     10
     11     11
     12     12
     13     13
     14     14
     15     15
     16     16
     17     17
     18     18
           2           3          12
      1      1
      2      2
      3      3
      4      4
      5      5
      6      6
      7      7
      8      8
      9      9
     10     10
     11     11
     12     12
     13     13
     14     14
     15     15
     16     16
     17     17
     18     18
           2           3          13
      1      1
      2      2
      3      3
      4      4
      5      5
      6      6
      7      7
      8      8
      9      9
     10     10
     11     11
     12     12
     13     13
     14     14
     15     15
     16     16
     17     17
     18     18
           2           3          14
      1      1
      2      2
      3      3
      4      4
      5      5
      6      6
      7      7
      8      8
      9      9
     10     10
     11     11
     12     12
     13     13
     14     14
     15     15
     16     16
     17     17
     18     18
           2           3          15
      1      1
      2      2
      3      3
      4      4
      5      5
      6      6
      7      7
      8      8
      9      9
     10     10
     11     11
     12     12
     13     13
     14     14
     15     15
     16     16
     17     17
     18     18
           2           3          16
      1      1
      2      2
      3      3
      4      4
      5      5
      6      6
      7      7
      8      8
      9      9
     10     10
     11     11
     12     12
     13     13
     14     14
     15     15
     16     16
     17     17
     18     18
           2           3          17
      1      1
      2      2
      3      3
      4      4
      5      5
      6      6
      7      7
      8      8
      9      9
     10     10
     11     11
     12     12
     13     13
     14     14
     15     15
     16     16
     17     17
     18     18
           2           3          18
      1      1
      2      2
      3      3
      4      4
      5      5
      6      6
      7      7
      8      8
      9      9
     10     10
     11     11
     12     12
     13     13
     14     14
     15     15
     16     16
     17     17
     18     18
           2           3          19
      1      1
      2      2
      3      3
      4      4
      5      5
      6      6
      7      7
      8      8
      9      9
     10     10
     11     11
     12     12
     13     13
     14     14
     15     15
     16     16
     17     17
     18     18
           2           3          20
      1      1
      2      2
      3      3
      4      4
      5      5
      6      6
      7      7
      8      8
      9      9
     10     10
     11     11
     12     12
     13     13
     14     14
     15     15
     16     16
     17     17
     18     18
           2           3          21
      1      1
      2      2
      3      3
      4      4
      5      5
      6      6
      7      7
      8      8
      9      9
     10     10
     11     11
     12     12
     13     13
     14     14
     15     15
     16     16
     17     17
     18     18
           2           3          22
      1      1
      2      2
      3      3
      4      4
      5      5
      6      6
      7      7
      8      8
      9      9
     10     10
     11     11
     12     12
     13     13
     14     14
     15     15
     16     16
     17     17
     18     18
           2           3          23
      1      1
      2      2
      3      3
      4      4
      5      5
      6      6
      7      7
      8      8
      9      9
     10     10
     11     11
     12     12
     13     13
     14     14
     15     15
     16     16
     17     17
     18     18
           2           3          24
      1      1
      2      2
      3      3
      4      4
      5      5
      6      6
      7      7
      8      8
      9      9
     10     10
     11     11
     12     12
     13     13
     14     14
     15     15
     16     16
     17     17
     18     18
           2           3          25
      1      1
      2      2
      3      3
      4      4
      5      5
      6      6
      7      7
      8      8
      9      9
     10     10
     11     11
     12     12
     13     13
     14     14
     15     15
     16     16
     17     17
     18     18
           2           3          26
      1      1
      2      2
      3      3
      4      4
      5      5
      6      6
      7      7
      8      8
      9      9
     10     10
     11     11
     12     12
     13     13
     14     14
     15     15
     16     16
     17     17
     18     18
           2           3          27
      1      1
      2      2
      3      3
      4      4
      5      5
      6      6
      7      7
      8      8
      9      9
     10     10
     11     11
     12     12
     13     13
     14     14
     15     15
     16     16
     17     17
     18     18
           2           3          28
      1      1
      2      2
      3      3
      4      4
      5      5
      6      6
      7      7
      8      8
      9      9
     10     10
     11     11
     12     12
     13     13
     14     14
     15     15
     16     16
     17     17
     18     18
           2           3          29
      1      1
      2      2
      3      3
      4      4
      5      5
      6      6
      7      7
      8      8
      9      9
     10     10
     11     11
     12     12
     13     13
     14     14
     15     15
     16     16
     17     17
     18     18
           2           3          30
      1      1
      2      2
      3      3
      4      4
      5      5
      6      6
      7      7
      8      8
      9      9
     10     10
     11     11
     12     12
     13     13
     14     14
     15     15
     16     16
     17     17
     18     18
           2           3          31
      1      1
      2      2
      3      3
      4      4
      5      5
      6      6
      7      7
      8      8
      9      9
     10     10
     11     11
     12     12
     13     13
     14     14
     15     15
     16     16
     17     17
     18     18
           2           3          32
      1      1
      2      2
      3      3
      4      4
      5      5
      6      6
      7      7
      8      8
      9      9
     10     10
     11     11
     12     12
     13     13
     14     14
     15     15
     16     16
     17     17
     18     18
           2           4           1
      1      1
      2      2
      3      3
      4      4
      5      5
      6      6
      7      7
      8      8
      9      9
     10     10
     11     11
     12     12
     13     13
     14     14
     15     15
     16     16
     17     17
     18     18
           2           4           2
      1      1
      2      2
      3      3
      4      4
      5      5
      6      6
      7      7
      8      8
      9      9
     10     10
     11     11
     12     12
     13     13
     14     14
     15     15
     16     16
     17     17
     18     18
           2           4           3
      1      1
      2      2
      3      3
      4      4
      5      5
      6      6
      7      7
      8      8
      9      9
     10     10
     11     11
     12     12
     13     13
     14     14
     15     15
     16     16
     17     17
     18     18
           2           4           4
      1      1
      2      2
      3      3
      4      4
      5      5
      6      6
      7      7
      8      8
      9      9
     10     10
     11     11
     12     12
     13     13
     14     14
     15     15
     16     16
     17     17
     18     18
           2           4           5
      1      1
      2      2
      3      3
      4      4
      5      5
      6      6
      7      7
      8      8
      9      9
     10     10
     11     11
     12     12
     13     13
     14     14
     15     15
     16     16
     17     17
     18     18
           2           4           6
      1      1
      2      2
      3      3
      4      4
      5      5
      6      6
      7      7
      8      8
      9      9
     10     10
     11     11
     12     12
     13     13
     14     14
     15     15
     16     16
     17     17
     18     18
           2           4           7
      1      1
      2      2
      3      3
      4      4
      5      5
      6      6
      7      7
      8      8
      9      9
     10     10
     11     11
     12     12
     13     13
     14     14
     15     15
     16     16
     17     17
     18     18
           2           4           8
      1      1
      2      2
      3      3
      4      4
      5      5
      6      6
      7      7
      8      8
      9      9
     10     10
     11     11
     12     12
     13     13
     14     14
     15     15
     16     16
     17     17
     18     18
           2           4           9
      1      1
      2      2
      3      3
      4      4
      5      5
      6      6
      7      7
      8      8
      9      9
     10     10
     11     11
     12     12
     13     13
     14     14
     15     15
     16     16
     17     17
     18     18
           2           4          10
      1      1
      2      2
      3      3
      4      4
      5      5
      6      6
      7      7
      8      8
      9      9
     10     10
     11     11
     12     12
     13     13
     14     14
     15     15
     16     16
     17     17
     18     18
           2           4          11
      1      1
      2      2
      3      3
      4      4
      5      5
      6      6
      7      7
      8      8
      9      9
     10     10
     11     11
     12     12
     13     13
     14     14
     15     15
     16     16
     17     17
     18     18
           2           4          12
      1      1
      2      2
      3      3
      4      4
      5      5
      6      6
      7      7
      8      8
      9      9
     10     10
     11     11
     12     12
     13     13
     14     14
     15     15
     16     16
     17     17
     18     18
           2           4          13
      1      1
      2      2
      3      3
      4      4
      5      5
      6      6
      7      7
      8      8
      9      9
     10     10
     11     11
     12     12
     13     13
     14     14
     15     15
     16     16
     17     17
     18     18
           2           4          14
      1      1
      2      2
      3      3
      4      4
      5      5
      6      6
      7      7
      8      8
      9      9
     10     10
     11     11
     12     12
     13     13
     14     14
     15     15
     16     16
     17     17
     18     18
           2           4          15
      1      1
      2      2
      3      3
      4      4
      5      5
      6      6
      7      7
      8      8
      9      9
     10     10
     11     11
     12     12
     13     13
     14     14
     15     15
     16     16
     17     17
     18     18
           2           4          16
      1      1
      2      2
      3      3
      4      4
      5      5
      6      6
      7      7
      8      8
      9      9
     10     10
     11     11
     12     12
     13     13
     14     14
     15     15
     16     16
     17     17
     18     18
           2           4          17
      1      1
      2      2
      3      3
      4      4
      5      5
      6      6
      7      7
      8      8
      9      9
     10     10
     11     11
     12     12
     13     13
     14     14
     15     15
     16     16
     17     17
     18     18
           2           4          18
      1      1
      2      2
      3      3
      4      4
      5      5
      6      6
      7      7
      8      8
      9      9
     10     10
     11     11
     12     12
     13     13
     14     14
     15     15
     16     16
     17     17
     18     18
           2           4          19
      1      1
      2      2
      3      3
      4      4
      5      5
      6      6
      7      7
      8      8
      9      9
     10     10
     11     11
     12     12
     13     13
     14     14
     15     15
     16     16
     17     17
     18     18
           2           4          20
      1      1
      2      2
      3      3
      4      4
      5      5
      6      6
      7      7
      8      8
      9      9
     10     10
     11     11
     12     12
     13     13
     14     14
     15     15
     16     16
     17     17
     18     18
           2           4          21
      1      1
      2      2
      3      3
      4      4
      5      5
      6      6
      7      7
      8      8
      9      9
     10     10
     11     11
     12     12
     13     13
     14     14
     15     15
     16     16
     17     17
     18     18
           2           4          22
      1      1
      2      2
      3      3
      4      4
      5      5
      6      6
      7      7
      8      8
      9      9
     10     10
     11     11
     12     12
     13     13
     14     14
     15     15
     16     16
     17     17
     18     18
           2           4          23
      1      1
      2      2
      3      3
      4      4
      5      5
      6      6
      7      7
      8      8
      9      9
     10     10
     11     11
     12     12
     13     13
     14     14
     15     15
     16     16
     17     17
     18     18
           2           4          24
      1      1
      2      2
      3      3
      4      4
      5      5
      6      6
      7      7
      8      8
      9      9
     10     10
     11     11
     12     12
     13     13
     14     14
     15     15
     16     16
     17     17
     18     18
           2           4          25
      1      1
      2      2
      3      3
      4      4
      5      5
      6      6
      7      7
      8      8
      9      9
     10     10
     11     11
     12     12
     13     13
     14     14
     15     15
     16     16
     17     17
     18     18
           2           4          26
      1      1
      2      2
      3      3
      4      4
      5      5
      6      6
      7      7
      8      8
      9      9
     10     10
     11     11
     12     12
     13     13
     14     14
     15     15
     16     16
     17     17
     18     18
           2           4          27
      1      1
      2      2
      3      3
      4      4
      5      5
      6      6
      7      7
      8      8
      9      9
     10     10
     11     11
     12     12
     13     13
     14     14
     15     15
     16     16
     17     17
     18     18
           2           4          28
      1      1
      2      2
      3      3
      4      4
      5      5
      6      6
      7      7
      8      8
      9      9
     10     10
     11     11
     12     12
     13     13
     14     14
     15     15
     16     16
     17     17
     18     18
           2           4          29
      1      1
      2      2
      3      3
      4      4
      5      5
      6      6
      7      7
      8      8
      9      9
     10     10
     11     11
     12     12
     13     13
     14     14
     15     15
     16     16
     17     17
     18     18
           2           4          30
      1      1
      2      2
      3      3
      4      4
      5      5
      6      6
      7      7
      8      8
      9      9
     10     10
     11     11
     12     12
     13     13
     14     14
     15     15
     16     16
     17     17
     18     18
           2           4          31
      1      1
      2      2
      3      3
      4      4
      5      5
      6      6
      7      7
      8      8
      9      9
     10     10
     11     11
     12     12
     13     13
     14     14
     15     15
     16     16
     17     17
     18     18
           2           4          32
      1      1
      2      2
      3      3
      4      4
      5      5
      6      6
      7      7
      8      8
      9      9
     10     10
     11     11
     12     12
     13     13
     14     14
     15     15
     16     16
     17     17
     18     18
           2           5           1
      1      1
      2      2
      3      3
      4      4
      5      5
      6      6
      7      7
      8      8
      9      9
     10     10
     11     11
     12     12
     13     13
     14     14
     15     15
     16     16
     17     17
     18     18
           2           5           2
      1      1
      2      2
      3      3
      4      4
      5      5
      6      6
      7      7
      8      8
      9      9
     10     10
     11     11
     12     12
     13     13
     14     14
     15     15
     16     16
     17     17
     18     18
           2           5           3
      1      1
      2      2
      3      3
      4      4
      5      5
      6      6
      7      7
      8      8
      9      9
     10     10
     11     11
     12     12
     13     13
     14     14
     15     15
     16     16
     17     17
     18     18
           2           5           4
      1      1
      2      2
      3      3
      4      4
      5      5
      6      6
      7      7
      8      8
      9      9
     10     10
     11     11
     12     12
     13     13
     14     14
     15     15
     16     16
     17     17
     18     18
           2           5           5
      1      1
      2      2
      3      3
      4      4
      5      5
      6      6
      7      7
      8      8
      9      9
     10     10
     11     11
     12     12
     13     13
     14     14
     15     15
     16     16
     17     17
     18     18
           2           5           6
      1      1
      2      2
      3      3
      4      4
      5      5
      6      6
      7      7
      8      8
      9      9
     10     10
     11     11
     12     12
     13     13
     14     14
     15     15
     16     16
     17     17
     18     18
           2           5           7
      1      1
      2      2
      3      3
      4      4
      5      5
      6      6
      7      7
      8      8
      9      9
     10     10
     11     11
     12     12
     13     13
     14     14
     15     15
     16     16
     17     17
     18     18
           2           5           8
      1      1
      2      2
      3      3
      4      4
      5      5
      6      6
      7      7
      8      8
      9      9
     10     10
     11     11
     12     12
     13     13
     14     14
     15     15
     16     16
     17     17
     18     18
           2           5           9
      1      1
      2      2
      3      3
      4      4
      5      5
      6      6
      7      7
      8      8
      9      9
     10     10
     11     11
     12     12
     13     13
     14     14
     15     15
     16     16
     17     17
     18     18
           2           5          10
      1      1
      2      2
      3      3
      4      4
      5      5
      6      6
      7      7
      8      8
      9      9
     10     10
     11     11
     12     12
     13     13
     14     14
     15     15
     16     16
     17     17
     18     18
           2           5          11
      1      1
      2      2
      3      3
      4      4
      5      5
      6      6
      7      7
      8      8
      9      9
     10     10
     11     11
     12     12
     13     13
     14     14
     15     15
     16     16
     17     17
     18     18
           2           5          12
      1      1
      2      2
      3      3
      4      4
      5      5
      6      6
      7      7
      8      8
      9      9
     10     10
     11     11
     12     12
     13     13
     14     14
     15     15
     16     16
     17     17
     18     18
           2           5          13
      1      1
      2      2
      3      3
      4      4
      5      5
      6      6
      7      7
      8      8
      9      9
     10     10
     11     11
     12     12
     13     13
     14     14
     15     15
     16     16
     17     17
     18     18
           2           5          14
      1      1
      2      2
      3      3
      4      4
      5      5
      6      6
      7      7
      8      8
      9      9
     10     10
     11     11
     12     12
     13     13
     14     14
     15     15
     16     16
     17     17
     18     18
           2           5          15
      1      1
      2      2
      3      3
      4      4
      5      5
      6      6
      7      7
      8      8
      9      9
     10     10
     11     11
     12     12
     13     13
     14     14
     15     15
     16     16
     17     17
     18     18
           2           5          16
      1      1
      2      2
      3      3
      4      4
      5      5
      6      6
      7      7
      8      8
      9      9
     10     10
     11     11
     12     12
     13     13
     14     14
     15     15
     16     16
     17     17
     18     18
           2           5          17
      1      1
      2      2
      3      3
      4      4
      5      5
      6      6
      7      7
      8      8
      9      9
     10     10
     11     11
     12     12
     13     13
     14     14
     15     15
     16     16
     17     17
     18     18
           2           5          18
      1      1
      2      2
      3      3
      4      4
      5      5
      6      6
      7      7
      8      8
      9      9
     10     10
     11     11
     12     12
     13     13
     14     14
     15     15
     16     16
     17     17
     18     18
           2           5          19
      1      1
      2      2
      3      3
      4      4
      5      5
      6      6
      7      7
      8      8
      9      9
     10     10
     11     11
     12     12
     13     13
     14     14
     15     15
     16     16
     17     17
     18     18
           2           5          20
      1      1
      2      2
      3      3
      4      4
      5      5
      6      6
      7      7
      8      8
      9      9
     10     10
     11     11
     12     12
     13     13
     14     14
     15     15
     16     16
     17     17
     18     18
           2           5          21
      1      1
      2      2
      3      3
      4      4
      5      5
      6      6
      7      7
      8      8
      9      9
     10     10
     11     11
     12     12
     13     13
     14     14
     15     15
     16     16
     17     17
     18     18
           2           5          22
      1      1
      2      2
      3      3
      4      4
      5      5
      6      6
      7      7
      8      8
      9      9
     10     10
     11     11
     12     12
     13     13
     14     14
     15     15
     16     16
     17     17
     18     18
           2           5          23
      1      1
      2      2
      3      3
      4      4
      5      5
      6      6
      7      7
      8      8
      9      9
     10     10
     11     11
     12     12
     13     13
     14     14
     15     15
     16     16
     17     17
     18     18
           2           5          24
      1      1
      2      2
      3      3
      4      4
      5      5
      6      6
      7      7
      8      8
      9      9
     10     10
     11     11
     12     12
     13     13
     14     14
     15     15
     16     16
     17     17
     18     18
           2           5          25
      1      1
      2      2
      3      3
      4      4
      5      5
      6      6
      7      7
      8      8
      9      9
     10     10
     11     11
     12     12
     13     13
     14     14
     15     15
     16     16
     17     17
     18     18
           2           5          26
      1      1
      2      2
      3      3
      4      4
      5      5
      6      6
      7      7
      8      8
      9      9
     10     10
     11     11
     12     12
     13     13
     14     14
     15     15
     16     16
     17     17
     18     18
           2           5          27
      1      1
      2      2
      3      3
      4      4
      5      5
      6      6
      7      7
      8      8
      9      9
     10     10
     11     11
     12     12
     13     13
     14     14
     15     15
     16     16
     17     17
     18     18
           2           5          28
      1      1
      2      2
      3      3
      4      4
      5      5
      6      6
      7      7
      8      8
      9      9
     10     10
     11     11
     12     12
     13     13
     14     14
     15     15
     16     16
     17     17
     18     18
           2           5          29
      1      1
      2      2
      3      3
      4      4
      5      5
      6      6
      7      7
      8      8
      9      9
     10     10
     11     11
     12     12
     13     13
     14     14
     15     15
     16     16
     17     17
     18     18
           2           5          30
      1      1
      2      2
      3      3
      4      4
      5      5
      6      6
      7      7
      8      8
      9      9
     10     10
     11     11
     12     12
     13     13
     14     14
     15     15
     16     16
     17     17
     18     18
           2           5          31
      1      1
      2      2
      3      3
      4      4
      5      5
      6      6
      7      7
      8      8
      9      9
     10     10
     11     11
     12     12
     13     13
     14     14
     15     15
     16     16
     17     17
     18     18
           2           5          32
      1      1
      2      2
      3      3
      4      4
      5      5
      6      6
      7      7
      8      8
      9      9
     10     10
     11     11
     12     12
     13     13
     14     14
     15     15
     16     16
     17     17
     18     18
           2           6           1
      1      1
      2      2
      3      3
      4      4
      5      5
      6      6
      7      7
      8      8
      9      9
     10     10
     11     11
     12     12
     13     13
     14     14
     15     15
     16     16
     17     17
     18     18
           2           6           2
      1      1
      2      2
      3      3
      4      4
      5      5
      6      6
      7      7
      8      8
      9      9
     10     10
     11     11
     12     12
     13     13
     14     14
     15     15
     16     16
     17     17
     18     18
           2           6           3
      1      1
      2      2
      3      3
      4      4
      5      5
      6      6
      7      7
      8      8
      9      9
     10     10
     11     11
     12     12
     13     13
     14     14
     15     15
     16     16
     17     17
     18     18
           2           6           4
      1      1
      2      2
      3      3
      4      4
      5      5
      6      6
      7      7
      8      8
      9      9
     10     10
     11     11
     12     12
     13     13
     14     14
     15     15
     16     16
     17     17
     18     18
           2           6           5
      1      1
      2      2
      3      3
      4      4
      5      5
      6      6
      7      7
      8      8
      9      9
     10     10
     11     11
     12     12
     13     13
     14     14
     15     15
     16     16
     17     17
     18     18
           2           6           6
      1      1
      2      2
      3      3
      4      4
      5      5
      6      6
      7      7
      8      8
      9      9
     10     10
     11     11
     12     12
     13     13
     14     14
     15     15
     16     16
     17     17
     18     18
           2           6           7
      1      1
      2      2
      3      3
      4      4
      5      5
      6      6
      7      7
      8      8
      9      9
     10     10
     11     11
     12     12
     13     13
     14     14
     15     15
     16     16
     17     17
     18     18
           2           6           8
      1      1
      2      2
      3      3
      4      4
      5      5
      6      6
      7      7
      8      8
      9      9
     10     10
     11     11
     12     12
     13     13
     14     14
     15     15
     16     16
     17     17
     18     18
           2           6           9
      1      1
      2      2
      3      3
      4      4
      5      5
      6      6
      7      7
      8      8
      9      9
     10     10
     11     11
     12     12
     13     13
     14     14
     15     15
     16     16
     17     17
     18     18
           2           6          10
      1      1
      2      2
      3      3
      4      4
      5      5
      6      6
      7      7
      8      8
      9      9
     10     10
     11     11
     12     12
     13     13
     14     14
     15     15
     16     16
     17     17
     18     18
           2           6          11
      1      1
      2      2
      3      3
      4      4
      5      5
      6      6
      7      7
      8      8
      9      9
     10     10
     11     11
     12     12
     13     13
     14     14
     15     15
     16     16
     17     17
     18     18
           2           6          12
      1      1
      2      2
      3      3
      4      4
      5      5
      6      6
      7      7
      8      8
      9      9
     10     10
     11     11
     12     12
     13     13
     14     14
     15     15
     16     16
     17     17
     18     18
           2           6          13
      1      1
      2      2
      3      3
      4      4
      5      5
      6      6
      7      7
      8      8
      9      9
     10     10
     11     11
     12     12
     13     13
     14     14
     15     15
     16     16
     17     17
     18     18
           2           6          14
      1      1
      2      2
      3      3
      4      4
      5      5
      6      6
      7      7
      8      8
      9      9
     10     10
     11     11
     12     12
     13     13
     14     14
     15     15
     16     16
     17     17
     18     18
           2           6          15
      1      1
      2      2
      3      3
      4      4
      5      5
      6      6
      7      7
      8      8
      9      9
     10     10
     11     11
     12     12
     13     13
     14     14
     15     15
     16     16
     17     17
     18     18
           2           6          16
      1      1
      2      2
      3      3
      4      4
      5      5
      6      6
      7      7
      8      8
      9      9
     10     10
     11     11
     12     12
     13     13
     14     14
     15     15
     16     16
     17     17
     18     18
           2           6          17
      1      1
      2      2
      3      3
      4      4
      5      5
      6      6
      7      7
      8      8
      9      9
     10     10
     11     11
     12     12
     13     13
     14     14
     15     15
     16     16
     17     17
     18     18
           2           6          18
      1      1
      2      2
      3      3
      4      4
      5      5
      6      6
      7      7
      8      8
      9      9
     10     10
     11     11
     12     12
     13     13
     14     14
     15     15
     16     16
     17     17
     18     18
           2           6          19
      1      1
      2      2
      3      3
      4      4
      5      5
      6      6
      7      7
      8      8
      9      9
     10     10
     11     11
     12     12
     13     13
     14     14
     15     15
     16     16
     17     17
     18     18
           2           6          20
      1      1
      2      2
      3      3
      4      4
      5      5
      6      6
      7      7
      8      8
      9      9
     10     10
     11     11
     12     12
     13     13
     14     14
     15     15
     16     16
     17     17
     18     18
           2           6          21
      1      1
      2      2
      3      3
      4      4
      5      5
      6      6
      7      7
      8      8
      9      9
     10     10
     11     11
     12     12
     13     13
     14     14
     15     15
     16     16
     17     17
     18     18
           2           6          22
      1      1
      2      2
      3      3
      4      4
      5      5
      6      6
      7      7
      8      8
      9      9
     10     10
     11     11
     12     12
     13     13
     14     14
     15     15
     16     16
     17     17
     18     18
           2           6          23
      1      1
      2      2
      3      3
      4      4
      5      5
      6      6
      7      7
      8      8
      9      9
     10     10
     11     11
     12     12
     13     13
     14     14
     15     15
     16     16
     17     17
     18     18
           2           6          24
      1      1
      2      2
      3      3
      4      4
      5      5
      6      6
      7      7
      8      8
      9      9
     10     10
     11     11
     12     12
     13     13
     14     14
     15     15
     16     16
     17     17
     18     18
           2           6          25
      1      1
      2      2
      3      3
      4      4
      5      5
      6      6
      7      7
      8      8
      9      9
     10     10
     11     11
     12     12
     13     13
     14     14
     15     15
     16     16
     17     17
     18     18
           2           6          26
      1      1
      2      2
      3      3
      4      4
      5      5
      6      6
      7      7
      8      8
      9      9
     10     10
     11     11
     12     12
     13     13
     14     14
     15     15
     16     16
     17     17
     18     18
           2           6          27
      1      1
      2      2
      3      3
      4      4
      5      5
      6      6
      7      7
      8      8
      9      9
     10     10
     11     11
     12     12
     13     13
     14     14
     15     15
     16     16
     17     17
     18     18
           2           6          28
      1      1
      2      2
      3      3
      4      4
      5      5
      6      6
      7      7
      8      8
      9      9
     10     10
     11     11
     12     12
     13     13
     14     14
     15     15
     16     16
     17     17
     18     18
           2           6          29
      1      1
      2      2
      3      3
      4      4
      5      5
      6      6
      7      7
      8      8
      9      9
     10     10
     11     11
     12     12
     13     13
     14     14
     15     15
     16     16
     17     17
     18     18
           2           6          30
      1      1
      2      2
      3      3
      4      4
      5      5
      6      6
      7      7
      8      8
      9      9
     10     10
     11     11
     12     12
     13     13
     14     14
     15     15
     16     16
     17     17
     18     18
           2           6          31
      1      1
      2      2
      3      3
      4      4
      5      5
      6      6
      7      7
      8      8
      9      9
     10     10
     11     11
     12     12
     13     13
     14     14
     15     15
     16     16
     17     17
     18     18
           2           6          32
      1      1
      2      2
      3      3
      4      4
      5      5
      6      6
      7      7
      8      8
      9      9
     10     10
     11     11
     12     12
     13     13
     14     14
     15     15
     16     16
     17     17
     18     18
           2           7           1
      1      1
      2      2
      3      3
      4      4
      5      5
      6      6
      7      7
      8      8
      9      9
     10     10
     11     11
     12     12
     13     13
     14     14
     15     15
     16     16
     17     17
     18     18
           2           7           2
      1      1
      2      2
      3      3
      4      4
      5      5
      6      6
      7      7
      8      8
      9      9
     10     10
     11     11
     12     12
     13     13
     14     14
     15     15
     16     16
     17     17
     18     18
           2           7           3
      1      1
      2      2
      3      3
      4      4
      5      5
      6      6
      7      7
      8      8
      9      9
     10     10
     11     11
     12     12
     13     13
     14     14
     15     15
     16     16
     17     17
     18     18
           2           7           4
      1      1
      2      2
      3      3
      4      4
      5      5
      6      6
      7      7
      8      8
      9      9
     10     10
     11     11
     12     12
     13     13
     14     14
     15     15
     16     16
     17     17
     18     18
           2           7           5
      1      1
      2      2
      3      3
      4      4
      5      5
      6      6
      7      7
      8      8
      9      9
     10     10
     11     11
     12     12
     13     13
     14     14
     15     15
     16     16
     17     17
     18     18
           2           7           6
      1      1
      2      2
      3      3
      4      4
      5      5
      6      6
      7      7
      8      8
      9      9
     10     10
     11     11
     12     12
     13     13
     14     14
     15     15
     16     16
     17     17
     18     18
           2           7           7
      1      1
      2      2
      3      3
      4      4
      5      5
      6      6
      7      7
      8      8
      9      9
     10     10
     11     11
     12     12
     13     13
     14     14
     15     15
     16     16
     17     17
     18     18
           2           7           8
      1      1
      2      2
      3      3
      4      4
      5      5
      6      6
      7      7
      8      8
      9      9
     10     10
     11     11
     12     12
     13     13
     14     14
     15     15
     16     16
     17     17
     18     18
           2           7           9
      1      1
      2      2
      3      3
      4      4
      5      5
      6      6
      7      7
      8      8
      9      9
     10     10
     11     11
     12     12
     13     13
     14     14
     15     15
     16     16
     17     17
     18     18
           2           7          10
      1      1
      2      2
      3      3
      4      4
      5      5
      6      6
      7      7
      8      8
      9      9
     10     10
     11     11
     12     12
     13     13
     14     14
     15     15
     16     16
     17     17
     18     18
           2           7          11
      1      1
      2      2
      3      3
      4      4
      5      5
      6      6
      7      7
      8      8
      9      9
     10     10
     11     11
     12     12
     13     13
     14     14
     15     15
     16     16
     17     17
     18     18
           2           7          12
      1      1
      2      2
      3      3
      4      4
      5      5
      6      6
      7      7
      8      8
      9      9
     10     10
     11     11
     12     12
     13     13
     14     14
     15     15
     16     16
     17     17
     18     18
           2           7          13
      1      1
      2      2
      3      3
      4      4
      5      5
      6      6
      7      7
      8      8
      9      9
     10     10
     11     11
     12     12
     13     13
     14     14
     15     15
     16     16
     17     17
     18     18
           2           7          14
      1      1
      2      2
      3      3
      4      4
      5      5
      6      6
      7      7
      8      8
      9      9
     10     10
     11     11
     12     12
     13     13
     14     14
     15     15
     16     16
     17     17
     18     18
           2           7          15
      1      1
      2      2
      3      3
      4      4
      5      5
      6      6
      7      7
      8      8
      9      9
     10     10
     11     11
     12     12
     13     13
     14     14
     15     15
     16     16
     17     17
     18     18
           2           7          16
      1      1
      2      2
      3      3
      4      4
      5      5
      6      6
      7      7
      8      8
      9      9
     10     10
     11     11
     12     12
     13     13
     14     14
     15     15
     16     16
     17     17
     18     18
           2           7          17
      1      1
      2      2
      3      3
      4      4
      5      5
      6      6
      7      7
      8      8
      9      9
     10     10
     11     11
     12     12
     13     13
     14     14
     15     15
     16     16
     17     17
     18     18
           2           7          18
      1      1
      2      2
      3      3
      4      4
      5      5
      6      6
      7      7
      8      8
      9      9
     10     10
     11     11
     12     12
     13     13
     14     14
     15     15
     16     16
     17     17
     18     18
           2           7          19
      1      1
      2      2
      3      3
      4      4
      5      5
      6      6
      7      7
      8      8
      9      9
     10     10
     11     11
     12     12
     13     13
     14     14
     15     15
     16     16
     17     17
     18     18
           2           7          20
      1      1
      2      2
      3      3
      4      4
      5      5
      6      6
      7      7
      8      8
      9      9
     10     10
     11     11
     12     12
     13     13
     14     14
     15     15
     16     16
     17     17
     18     18
           2           7          21
      1      1
      2      2
      3      3
      4      4
      5      5
      6      6
      7      7
      8      8
      9      9
     10     10
     11     11
     12     12
     13     13
     14     14
     15     15
     16     16
     17     17
     18     18
           2           7          22
      1      1
      2      2
      3      3
      4      4
      5      5
      6      6
      7      7
      8      8
      9      9
     10     10
     11     11
     12     12
     13     13
     14     14
     15     15
     16     16
     17     17
     18     18
           2           7          23
      1      1
      2      2
      3      3
      4      4
      5      5
      6      6
      7      7
      8      8
      9      9
     10     10
     11     11
     12     12
     13     13
     14     14
     15     15
     16     16
     17     17
     18     18
           2           7          24
      1      1
      2      2
      3      3
      4      4
      5      5
      6      6
      7      7
      8      8
      9      9
     10     10
     11     11
     12     12
     13     13
     14     14
     15     15
     16     16
     17     17
     18     18
           2           7          25
      1      1
      2      2
      3      3
      4      4
      5      5
      6      6
      7      7
      8      8
      9      9
     10     10
     11     11
     12     12
     13     13
     14     14
     15     15
     16     16
     17     17
     18     18
           2           7          26
      1      1
      2      2
      3      3
      4      4
      5      5
      6      6
      7      7
      8      8
      9      9
     10     10
     11     11
     12     12
     13     13
     14     14
     15     15
     16     16
     17     17
     18     18
           2           7          27
      1      1
      2      2
      3      3
      4      4
      5      5
      6      6
      7      7
      8      8
      9      9
     10     10
     11     11
     12     12
     13     13
     14     14
     15     15
     16     16
     17     17
     18     18
           2           7          28
      1      1
      2      2
      3      3
      4      4
      5      5
      6      6
      7      7
      8      8
      9      9
     10     10
     11     11
     12     12
     13     13
     14     14
     15     15
     16     16
     17     17
     18     18
           2           7          29
      1      1
      2      2
      3      3
      4      4
      5      5
      6      6
      7      7
      8      8
      9      9
     10     10
     11     11
     12     12
     13     13
     14     14
     15     15
     16     16
     17     17
     18     18
           2           7          30
      1      1
      2      2
      3      3
      4      4
      5      5
      6      6
      7      7
      8      8
      9      9
     10     10
     11     11
     12     12
     13     13
     14     14
     15     15
     16     16
     17     17
     18     18
           2           7          31
      1      1
      2      2
      3      3
      4      4
      5      5
      6      6
      7      7
      8      8
      9      9
     10     10
     11     11
     12     12
     13     13
     14     14
     15     15
     16     16
     17     17
     18     18
           2           7          32
      1      1
      2      2
      3      3
      4      4
      5      5
      6      6
      7      7
      8      8
      9      9
     10     10
     11     11
     12     12
     13     13
     14     14
     15     15
     16     16
     17     17
     18     18
           2           8           1
      1      1
      2      2
      3      3
      4      4
      5      5
      6      6
      7      7
      8      8
      9      9
     10     10
     11     11
     12     12
     13     13
     14     14
     15     15
     16     16
     17     17
     18     18
           2           8           2
      1      1
      2      2
      3      3
      4      4
      5      5
      6      6
      7      7
      8      8
      9      9
     10     10
     11     11
     12     12
     13     13
     14     14
     15     15
     16     16
     17     17
     18     18
           2           8           3
      1      1
      2      2
      3      3
      4      4
      5      5
      6      6
      7      7
      8      8
      9      9
     10     10
     11     11
     12     12
     13     13
     14     14
     15     15
     16     16
     17     17
     18     18
           2           8           4
      1      1
      2      2
      3      3
      4      4
      5      5
      6      6
      7      7
      8      8
      9      9
     10     10
     11     11
     12     12
     13     13
     14     14
     15     15
     16     16
     17     17
     18     18
           2           8           5
      1      1
      2      2
      3      3
      4      4
      5      5
      6      6
      7      7
      8      8
      9      9
     10     10
     11     11
     12     12
     13     13
     14     14
     15     15
     16     16
     17     17
     18     18
           2           8           6
      1      1
      2      2
      3      3
      4      4
      5      5
      6      6
      7      7
      8      8
      9      9
     10     10
     11     11
     12     12
     13     13
     14     14
     15     15
     16     16
     17     17
     18     18
           2           8           7
      1      1
      2      2
      3      3
      4      4
      5      5
      6      6
      7      7
      8      8
      9      9
     10     10
     11     11
     12     12
     13     13
     14     14
     15     15
     16     16
     17     17
     18     18
           2           8           8
      1      1
      2      2
      3      3
      4      4
      5      5
      6      6
      7      7
      8      8
      9      9
     10     10
     11     11
     12     12
     13     13
     14     14
     15     15
     16     16
     17     17
     18     18
           2           8           9
      1      1
      2      2
      3      3
      4      4
      5      5
      6      6
      7      7
      8      8
      9      9
     10     10
     11     11
     12     12
     13     13
     14     14
     15     15
     16     16
     17     17
     18     18
           2           8          10
      1      1
      2      2
      3      3
      4      4
      5      5
      6      6
      7      7
      8      8
      9      9
     10     10
     11     11
     12     12
     13     13
     14     14
     15     15
     16     16
     17     17
     18     18
           2           8          11
      1      1
      2      2
      3      3
      4      4
      5      5
      6      6
      7      7
      8      8
      9      9
     10     10
     11     11
     12     12
     13     13
     14     14
     15     15
     16     16
     17     17
     18     18
           2           8          12
      1      1
      2      2
      3      3
      4      4
      5      5
      6      6
      7      7
      8      8
      9      9
     10     10
     11     11
     12     12
     13     13
     14     14
     15     15
     16     16
     17     17
     18     18
           2           8          13
      1      1
      2      2
      3      3
      4      4
      5      5
      6      6
      7      7
      8      8
      9      9
     10     10
     11     11
     12     12
     13     13
     14     14
     15     15
     16     16
     17     17
     18     18
           2           8          14
      1      1
      2      2
      3      3
      4      4
      5      5
      6      6
      7      7
      8      8
      9      9
     10     10
     11     11
     12     12
     13     13
     14     14
     15     15
     16     16
     17     17
     18     18
           2           8          15
      1      1
      2      2
      3      3
      4      4
      5      5
      6      6
      7      7
      8      8
      9      9
     10     10
     11     11
     12     12
     13     13
     14     14
     15     15
     16     16
     17     17
     18     18
           2           8          16
      1      1
      2      2
      3      3
      4      4
      5      5
      6      6
      7      7
      8      8
      9      9
     10     10
     11     11
     12     12
     13     13
     14     14
     15     15
     16     16
     17     17
     18     18
           2           8          17
      1      1
      2      2
      3      3
      4      4
      5      5
      6      6
      7      7
      8      8
      9      9
     10     10
     11     11
     12     12
     13     13
     14     14
     15     15
     16     16
     17     17
     18     18
           2           8          18
      1      1
      2      2
      3      3
      4      4
      5      5
      6      6
      7      7
      8      8
      9      9
     10     10
     11     11
     12     12
     13     13
     14     14
     15     15
     16     16
     17     17
     18     18
           2           8          19
      1      1
      2      2
      3      3
      4      4
      5      5
      6      6
      7      7
      8      8
      9      9
     10     10
     11     11
     12     12
     13     13
     14     14
     15     15
     16     16
     17     17
     18     18
           2           8          20
      1      1
      2      2
      3      3
      4      4
      5      5
      6      6
      7      7
      8      8
      9      9
     10     10
     11     11
     12     12
     13     13
     14     14
     15     15
     16     16
     17     17
     18     18
           2           8          21
      1      1
      2      2
      3      3
      4      4
      5      5
      6      6
      7      7
      8      8
      9      9
     10     10
     11     11
     12     12
     13     13
     14     14
     15     15
     16     16
     17     17
     18     18
           2           8          22
      1      1
      2      2
      3      3
      4      4
      5      5
      6      6
      7      7
      8      8
      9      9
     10     10
     11     11
     12     12
     13     13
     14     14
     15     15
     16     16
     17     17
     18     18
           2           8          23
      1      1
      2      2
      3      3
      4      4
      5      5
      6      6
      7      7
      8      8
      9      9
     10     10
     11     11
     12     12
     13     13
     14     14
     15     15
     16     16
     17     17
     18     18
           2           8          24
      1      1
      2      2
      3      3
      4      4
      5      5
      6      6
      7      7
      8      8
      9      9
     10     10
     11     11
     12     12
     13     13
     14     14
     15     15
     16     16
     17     17
     18     18
           2           8          25
      1      1
      2      2
      3      3
      4      4
      5      5
      6      6
      7      7
      8      8
      9      9
     10     10
     11     11
     12     12
     13     13
     14     14
     15     15
     16     16
     17     17
     18     18
           2           8          26
      1      1
      2      2
      3      3
      4      4
      5      5
      6      6
      7      7
      8      8
      9      9
     10     10
     11     11
     12     12
     13     13
     14     14
     15     15
     16     16
     17     17
     18     18
           2           8          27
      1      1
      2      2
      3      3
      4      4
      5      5
      6      6
      7      7
      8      8
      9      9
     10     10
     11     11
     12     12
     13     13
     14     14
     15     15
     16     16
     17     17
     18     18
           2           8          28
      1      1
      2      2
      3      3
      4      4
      5      5
      6      6
      7      7
      8      8
      9      9
     10     10
     11     11
     12     12
     13     13
     14     14
     15     15
     16     16
     17     17
     18     18
           2           8          29
      1      1
      2      2
      3      3
      4      4
      5      5
      6      6
      7      7
      8      8
      9      9
     10     10
     11     11
     12     12
     13     13
     14     14
     15     15
     16     16
     17     17
     18     18
           2           8          30
      1      1
      2      2
      3      3
      4      4
      5      5
      6      6
      7      7
      8      8
      9      9
     10     10
     11     11
     12     12
     13     13
     14     14
     15     15
     16     16
     17     17
     18     18
           2           8          31
      1      1
      2      2
      3      3
      4      4
      5      5
      6      6
      7      7
      8      8
      9      9
     10     10
     11     11
     12     12
     13     13
     14     14
     15     15
     16     16
     17     17
     18     18
           2           8          32
      1      1
      2      2
      3      3
      4      4
      5      5
      6      6
      7      7
      8      8
      9      9
     10     10
     11     11
     12     12
     13     13
     14     14
     15     15
     16     16
     17     17
     18     18
           2           9           1
      1      1
      2      2
      3      3
      4      4
      5      5
      6      6
      7      7
      8      8
      9      9
     10     10
     11     11
     12     12
     13     13
     14     14
     15     15
     16     16
     17     17
     18     18
           2           9           2
      1      1
      2      2
      3      3
      4      4
      5      5
      6      6
      7      7
      8      8
      9      9
     10     10
     11     11
     12     12
     13     13
     14     14
     15     15
     16     16
     17     17
     18     18
           2           9           3
      1      1
      2      2
      3      3
      4      4
      5      5
      6      6
      7      7
      8      8
      9      9
     10     10
     11     11
     12     12
     13     13
     14     14
     15     15
     16     16
     17     17
     18     18
           2           9           4
      1      1
      2      2
      3      3
      4      4
      5      5
      6      6
      7      7
      8      8
      9      9
     10     10
     11     11
     12     12
     13     13
     14     14
     15     15
     16     16
     17     17
     18     18
           2           9           5
      1      1
      2      2
      3      3
      4      4
      5      5
      6      6
      7      7
      8      8
      9      9
     10     10
     11     11
     12     12
     13     13
     14     14
     15     15
     16     16
     17     17
     18     18
           2           9           6
      1      1
      2      2
      3      3
      4      4
      5      5
      6      6
      7      7
      8      8
      9      9
     10     10
     11     11
     12     12
     13     13
     14     14
     15     15
     16     16
     17     17
     18     18
           2           9           7
      1      1
      2      2
      3      3
      4      4
      5      5
      6      6
      7      7
      8      8
      9      9
     10     10
     11     11
     12     12
     13     13
     14     14
     15     15
     16     16
     17     17
     18     18
           2           9           8
      1      1
      2      2
      3      3
      4      4
      5      5
      6      6
      7      7
      8      8
      9      9
     10     10
     11     11
     12     12
     13     13
     14     14
     15     15
     16     16
     17     17
     18     18
           2           9           9
      1      1
      2      2
      3      3
      4      4
      5      5
      6      6
      7      7
      8      8
      9      9
     10     10
     11     11
     12     12
     13     13
     14     14
     15     15
     16     16
     17     17
     18     18
           2           9          10
      1      1
      2      2
      3      3
      4      4
      5      5
      6      6
      7      7
      8      8
      9      9
     10     10
     11     11
     12     12
     13     13
     14     14
     15     15
     16     16
     17     17
     18     18
           2           9          11
      1      1
      2      2
      3      3
      4      4
      5      5
      6      6
      7      7
      8      8
      9      9
     10     10
     11     11
     12     12
     13     13
     14     14
     15     15
     16     16
     17     17
     18     18
           2           9          12
      1      1
      2      2
      3      3
      4      4
      5      5
      6      6
      7      7
      8      8
      9      9
     10     10
     11     11
     12     12
     13     13
     14     14
     15     15
     16     16
     17     17
     18     18
           2           9          13
      1      1
      2      2
      3      3
      4      4
      5      5
      6      6
      7      7
      8      8
      9      9
     10     10
     11     11
     12     12
     13     13
     14     14
     15     15
     16     16
     17     17
     18     18
           2           9          14
      1      1
      2      2
      3      3
      4      4
      5      5
      6      6
      7      7
      8      8
      9      9
     10     10
     11     11
     12     12
     13     13
     14     14
     15     15
     16     16
     17     17
     18     18
           2           9          15
      1      1
      2      2
      3      3
      4      4
      5      5
      6      6
      7      7
      8      8
      9      9
     10     10
     11     11
     12     12
     13     13
     14     14
     15     15
     16     16
     17     17
     18     18
           2           9          16
      1      1
      2      2
      3      3
      4      4
      5      5
      6      6
      7      7
      8      8
      9      9
     10     10
     11     11
     12     12
     13     13
     14     14
     15     15
     16     16
     17     17
     18     18
           2           9          17
      1      1
      2      2
      3      3
      4      4
      5      5
      6      6
      7      7
      8      8
      9      9
     10     10
     11     11
     12     12
     13     13
     14     14
     15     15
     16     16
     17     17
     18     18
           2           9          18
      1      1
      2      2
      3      3
      4      4
      5      5
      6      6
      7      7
      8      8
      9      9
     10     10
     11     11
     12     12
     13     13
     14     14
     15     15
     16     16
     17     17
     18     18
           2           9          19
      1      1
      2      2
      3      3
      4      4
      5      5
      6      6
      7      7
      8      8
      9      9
     10     10
     11     11
     12     12
     13     13
     14     14
     15     15
     16     16
     17     17
     18     18
           2           9          20
      1      1
      2      2
      3      3
      4      4
      5      5
      6      6
      7      7
      8      8
      9      9
     10     10
     11     11
     12     12
     13     13
     14     14
     15     15
     16     16
     17     17
     18     18
           2           9          21
      1      1
      2      2
      3      3
      4      4
      5      5
      6      6
      7      7
      8      8
      9      9
     10     10
     11     11
     12     12
     13     13
     14     14
     15     15
     16     16
     17     17
     18     18
           2           9          22
      1      1
      2      2
      3      3
      4      4
      5      5
      6      6
      7      7
      8      8
      9      9
     10     10
     11     11
     12     12
     13     13
     14     14
     15     15
     16     16
     17     17
     18     18
           2           9          23
      1      1
      2      2
      3      3
      4      4
      5      5
      6      6
      7      7
      8      8
      9      9
     10     10
     11     11
     12     12
[truncated: 31,516,102 more chars]
