# Supplementary material for: A Process for Modelling Diffuse Scattering from Disordered Molecular Crystals, Illustrated by Application to Monoclinic 9-Chloro-10-methylanthracene
Source: Hindawi journal article supplement (doi:10.1155/2015/878463), 2015-01-01
Supplement: f2 [file 878463.f2.zip › 878463.f2/progs/ZMC_source/sort_functions.f90]

module sort_functions

  use precision

  implicit none

  private

  !! This module provides sorting routines for integer, real and
  !! character arrays. A generic interface is used, so the same
  !! commands will work with all three types of input.
  !!
  !! There is a functional interface (.sort.) which returns an
  !! an array which, if it is used to index the original array,
  !! will produce an array sorted in ascending order. There is
  !! also a subroutine interface, which will sort the array that
  !! is passed to it and return it. The subroutines just call 
  !! the functional interface and use the result to index the
  !! array.
  !!
  !! There is also a convenience function to return an index of 
  !! the unique elements in an array. This is slightly harder
  !! to use as straight subscripting will not work -- the index 
  !! array will be zero padded with the number of zeroes depending 
  !! on how many duplicate values there are.

  !! $Log: sort_functions.f90,v $
  !! Revision 1.3  2005/10/14 04:24:39  aidan
  !! Changed the basic sort 'engine' to a quicksort after unacceptably long
  !! sorting times for 2000x2000 synchrotron data.
  !!
  !! Revision 1.2  2003/09/12 03:52:23  aidan
  !! Added support for sorting double precision lists. Added a reverse function.
  !!
  !! Revision 1.1  2003/08/19 07:03:55  aidan
  !! Initial revision
  !!

  ! Revision control software updates this character parameter.
  ! The 'ident' command can extract this version string from an
  ! object file or executable, which means one can identify which
  ! version of the module was used to compile it.
  character(len=*), parameter :: version = "$Id: sort_functions.f90,v 1.3 2005/10/14 04:24:39 aidan Exp aidan $"

  ! A generic interface to the operator which returns sorted indices
  interface operator(.unique.)
     module procedure unique_integer_mask, unique_real_mask, unique_double_mask, unique_string_mask
  end interface

  ! A generic interface to the operator which returns sorted indices
  interface num_unique
     module procedure num_unique_integers, num_unique_reals, num_unique_doubles, num_unique_strings
  end interface

  ! A generic interface to the operator which returns sorted indices
  interface unique
     module procedure unique_integers, unique_reals, unique_doubles, unique_strings
  end interface

  ! A generic interface to the operator which returns sorted indices
  interface operator(.sort.)
     ! module procedure sort_real_return_key, sort_double_return_key, sort_integer_return_key, sort_strings_return_keys
     module procedure qsortd_integer, qsortd_real, qsortd_double, sort_strings_return_keys
  end interface

  ! A subroutine interface -- calls operator interface and then reorders
  ! input array 
  interface sort
     module procedure sort_integer, sort_real, sort_double, sort_string
  end interface

  ! Simple function to reverse the order of a 1D array
  interface reverse
     module procedure reverse_integer, reverse_real, reverse_double, reverse_string
  end interface

  !
  ! Public stuff
  !

  ! Public routines
  public :: sort, unique, num_unique, reverse

  ! Public operators
  public :: operator(.sort.), operator(.unique.)

contains

  subroutine sort_integer (list)

    ! Performs a heapsort into ascending order of the input list -- calls 
    ! another routine to provide a sorted index key, and then just sets it to this

    ! Input and output variable
    integer, dimension(:), intent(inout) :: list

    list = list(.sort. list)

    return
  end subroutine sort_integer

  subroutine sort_real (list)

    ! Performs a heapsort into ascending order of the input list -- calls 
    ! another routine to provide a sorted index key, and then just sets it to this

    ! Input and output variable
    real, dimension(:), intent(inout) :: list

    list = list(.sort. list)

    return
  end subroutine sort_real

  subroutine sort_double (list)

    ! Performs a heapsort into ascending order of the input list -- calls 
    ! another routine to provide a sorted index key, and then just sets it to this

    ! Input and output variable
    real(kind=8), dimension(:), intent(inout) :: list

    list = list(.sort. list)

    return
  end subroutine sort_double

  subroutine sort_string (list)

    ! Performs a heapsort into ascending order of the input list -- calls 
    ! another routine to provide a sorted index key, and then just sets it to this

    ! Input and output variable
    character(len=*), dimension(:), intent(inout) :: list

    list = list(.sort. list)

    return
  end subroutine sort_string

  function sort_integer_return_key (list) result(key)

    ! Input/Output variables
    integer, dimension(:), intent(in) :: list
    integer, dimension(size(list))    :: key

    ! Local variables
    integer :: i, j, k, n, index, lists, keys

    n = size(list)

    ! initialize index into the original ordering
    key = (/ (i, i=1,n) /)

    ! perform the heapsort of the input list
    k = n/2 + 1
    index = n
    do while (n .gt. 1)
       if (k .gt. 1) then
          k = k - 1
          keys = key(k)
          lists = list(keys)
       else
          keys = key(index)
          lists = list(keys)
          key(index) = key(1)
          index = index - 1
          if (index .le. 1) then
             key(1) = keys
             return
          end if
       end if
       i = k
       j = k + k
       do while (j .le. index)
          if (j .lt. index) then
             if (list(key(j)) .lt. list(key(j+1)))  j = j + 1
          end if
          if (lists .lt. list(key(j))) then
             key(i) = key(j)
             i = j
             j = j + j
          else
             j = index + 1
          end if
       end do
       key(i) = keys
    end do
    return
  end function sort_integer_return_key

  function sort_real_return_key (list) result(key)

    ! Input/Output variables
    real, dimension(:), intent(in) :: list
    integer, dimension(size(list)) :: key

    ! Local variables
    real    :: lists
    integer :: i, j, k, n, index, keys

    n = size(list)

    ! initialize index into the original ordering
    key = (/ (i, i=1,n) /)

    ! perform the heapsort of the input list
    k = n/2 + 1
    index = n
    do while (n .gt. 1)
       if (k .gt. 1) then
          k = k - 1
          keys = key(k)
          lists = list(keys)
       else
          keys = key(index)
          lists = list(keys)
          key(index) = key(1)
          index = index - 1
          if (index .le. 1) then
             key(1) = keys
             return
          end if
       end if
       i = k
       j = k + k
       do while (j .le. index)
          if (j .lt. index) then
             if (list(key(j)) .lt. list(key(j+1)))  j = j + 1
          end if
          if (lists .lt. list(key(j))) then
             key(i) = key(j)
             i = j
             j = j + j
          else
             j = index + 1
          end if
       end do
       key(i) = keys
    end do
    return
  end function sort_real_return_key

  function sort_double_return_key (list) result(key)

    ! Input/Output variables
    real(kind=8), dimension(:), intent(in) :: list
    integer, dimension(size(list)) :: key

    ! Local variables
    real(kind=8)    :: lists
    integer :: i, j, k, n, index, keys

    n = size(list)

    ! initialize index into the original ordering
    key = (/ (i, i=1,n) /)

    ! perform the heapsort of the input list
    k = n/2 + 1
    index = n
    do while (n .gt. 1)
       if (k .gt. 1) then
          k = k - 1
          keys = key(k)
          lists = list(keys)
       else
          keys = key(index)
          lists = list(keys)
          key(index) = key(1)
          index = index - 1
          if (index .le. 1) then
             key(1) = keys
             return
          end if
       end if
       i = k
       j = k + k
       do while (j .le. index)
          if (j .lt. index) then
             if (list(key(j)) .lt. list(key(j+1)))  j = j + 1
          end if
          if (lists .lt. list(key(j))) then
             key(i) = key(j)
             i = j
             j = j + j
          else
             j = index + 1
          end if
       end do
       key(i) = keys
    end do
    return
  end function sort_double_return_key

  function sort_strings_return_keys(list) result(key)

    ! Takes an input list of character strings and sorts it into 
    ! alphabetical order using the Heapsort algorithm and returns 
    ! a key (index) which can be used to produce an ordered array

    ! Input/Output variables
    character(len=*), dimension(:), intent(in) :: list
    integer, dimension(size(list))             :: key

    ! Local variables
    character(len=len(list)) :: lists
    integer :: i, j, k, n, index, keys

    n = size(list)

    ! initialize index into the original ordering
    key = (/ (i, i=1,n) /)

    ! perform the heapsort of the input list
    k = n/2 + 1
    index = n
    do while (n .gt. 1)
       if (k .gt. 1) then
          k = k - 1
          keys = key(k)
          lists = list(keys)
       else
          keys = key(index)
          lists = list(keys)
          key(index) = key(1)
          index = index - 1
          if (index .le. 1) then
             key(1) = keys
             return
          end if
       end if
       i = k
       j = k + k
       do while (j .le. index)
          if (j .lt. index) then
             if (list(key(j)) .lt. list(key(j+1)))  j = j + 1
          end if
          if (lists .lt. list(key(j))) then
             key(i) = key(j)
             i = j
             j = j + j
          else
             j = index + 1
          end if
       end do
       key(i) = keys
    end do
    return
  end function sort_strings_return_keys

  function unique_integers (list)

    ! Returns an list of the unique values in a sorted list. If
    ! the list isn't sorted this will return junk.

    ! Input variable
    integer, dimension(:), intent(in)             :: list

    ! Return value -- the dimension of the return value is
    ! determined by a call to another function, which determines 
    ! the number of unique entries itself. This means we are 
    ! doing the work twice, which is a pity. It lets us do neat
    ! tricks like this though, which is nice. If speed is an 
    ! issue call .unique. operator and use the logical array mask 
    ! directly
    integer, dimension(num_unique(list)) :: unique_integers

    ! Pack all the unique values from list into return array
    unique_integers = pack(list,(.unique. (list)))

  end function unique_integers

  pure function unique_integer_mask (list) result(mask)

    ! Returns an index of unique values in the sorted list. If
    ! the list isn't sorted this will return junk. The user will
    ! have to use a 'where (key /= 0)' or similar statement to get
    ! useful information from the key array.

    ! Input variables
    integer, dimension(:), intent(in) :: list

    ! Return value
    logical, dimension(size(list))    :: mask

    ! Test if each element in the array is the same as it's neighbour
    ! at an index value of one less
    mask = (list /= cshift(list,-1))

    ! Make sure the first value is always unique ...
    mask(1) = .TRUE.

  end function unique_integer_mask

  pure function num_unique_integers (list) result(n)

    ! Returns the number of unique values in a sorted list

    ! Input/Output variables
    integer, dimension(:), intent(in) :: list

    integer :: n

    ! Count the number of true values in the mask returned by .unique.
    n = count(.unique.(list))

  end function num_unique_integers

  function unique_reals (list)

    ! Returns an list of the unique values in a sorted list. If
    ! the list isn't sorted this will return junk.

    ! Input variable
    real, dimension(:), intent(in)             :: list

    ! Return value -- the dimension of the return value is
    ! determined by a call to another function, which determines 
    ! the number of unique entries itself. This means we are 
    ! doing the work twice, which is a pity. It lets us do neat
    ! tricks like this though, which is nice. If speed is an 
    ! issue call .unique. operator and use the logical array mask 
    ! directly
    real, dimension(num_unique(list)) :: unique_reals

    ! Pack all the unique values from list into return array
    unique_reals = pack(list,(.unique. (list)))

  end function unique_reals

  pure function unique_real_mask (list) result(mask)

    ! Returns an index of unique values in the sorted list. If
    ! the list isn't sorted this will return junk. The user will
    ! have to use a 'where (key /= 0)' or similar statement to get
    ! useful information from the key array.

    ! Input variables
    real, dimension(:), intent(in) :: list

    ! Return value
    logical, dimension(size(list))    :: mask

    ! Test if each element in the array is the same as it's neighbour
    ! at an index value of one less
    mask = (list /= cshift(list,-1))

    ! Make sure the first value is always unique ...
    mask(1) = .TRUE.

  end function unique_real_mask

  pure function num_unique_reals (list) result(n)

    ! Returns the number of unique values in a sorted list

    ! Input/Output variables
    real, dimension(:), intent(in) :: list

    integer :: n

    ! Count the number of true values in the mask returned by .unique.
    n = count(.unique.(list))
    
  end function num_unique_reals

  function unique_doubles (list)

    ! Returns an list of the unique values in a sorted list. If
    ! the list isn't sorted this will return junk.

    ! Input variable
    real(kind=8), dimension(:), intent(in)             :: list

    ! Return value -- the dimension of the return value is
    ! determined by a call to another function, which determines 
    ! the number of unique entries itself. This means we are 
    ! doing the work twice, which is a pity. It lets us do neat
    ! tricks like this though, which is nice. If speed is an 
    ! issue call .unique. operator and use the logical array mask 
    ! directly
    real(kind=8), dimension(num_unique(list)) :: unique_doubles

    ! Pack all the unique values from list into return array
    unique_doubles = pack(list,(.unique. (list)))

  end function unique_doubles

  pure function unique_double_mask (list) result(mask)

    ! Returns an index of unique values in the sorted list. If
    ! the list isn't sorted this will return junk. The user will
    ! have to use a 'where (key /= 0)' or similar statement to get
    ! useful information from the key array.

    ! Input variables
    real(kind=8), dimension(:), intent(in) :: list

    ! Return value
    logical, dimension(size(list))    :: mask

    ! Test if each element in the array is the same as it's neighbour
    ! at an index value of one less
    mask = (list /= cshift(list,-1))

    ! Make sure the first value is always unique ...
    mask(1) = .TRUE.

  end function unique_double_mask

  pure function num_unique_doubles (list) result(n)

    ! Returns the number of unique values in a sorted list

    ! Input/Output variables
    real(kind=8), dimension(:), intent(in) :: list

    integer :: n

    ! Count the number of true values in the mask returned by .unique.
    n = count(.unique.(list))
    
  end function num_unique_doubles

  function unique_strings (list)

    ! Returns an list of the unique values in a sorted list. If
    ! the list isn't sorted this will return junk.

    ! Input variable
    character(len=*), dimension(:), intent(in) :: list

    ! Return value -- the dimension of the return value is
    ! determined by a call to another function, which determines 
    ! the number of unique entries itself. This means we are 
    ! doing the work twice, which is a pity. It lets us do neat
    ! tricks like this though, which is nice. If speed is an 
    ! issue call .unique. operator and use the logical array mask 
    ! directly
    character(len=len(list)), dimension(num_unique(list)) :: unique_strings

    ! Pack all the unique values from list into return array
    unique_strings = pack(list,(.unique. (list)))

  end function unique_strings

  pure function unique_string_mask (list) result(mask)

    ! Returns an index of unique values in the sorted list. If
    ! the list isn't sorted this will return junk. The user will
    ! have to use a 'where (key /= 0)' or similar statement to get
    ! useful information from the key array.

    ! Input variables
    character(len=*), dimension(:), intent(in) :: list

    ! Return value
    logical, dimension(size(list))    :: mask

    ! Test if each element in the array is the same as it's neighbour
    ! at an index value of one less
    mask = (list /= cshift(list,-1))

    ! Make sure the first value is always unique ...
    mask(1) = .TRUE.

  end function unique_string_mask

  pure function num_unique_strings (list) result(n)

    ! Returns the number of unique values in a sorted list

    ! Input/Output variables
    character(len=*), dimension(:), intent(in) :: list

    integer :: n

    ! Count the number of true values in the mask returned by .unique.
    n = count(.unique.(list))

  end function num_unique_strings

  pure function reverse_integer (list) result(revlist)

    integer, dimension(:), intent(in)                 :: list
    integer, dimension(lbound(list,1):ubound(list,1)) :: revlist
    
    revlist = list(ubound(list,1):lbound(list,1):-1)

  end function reverse_integer

  pure function reverse_real (list) result(revlist)

    real, dimension(:), intent(in)                 :: list
    real, dimension(lbound(list,1):ubound(list,1)) :: revlist
    
    revlist = list(ubound(list,1):lbound(list,1):-1)

  end function reverse_real

  pure function reverse_double (list) result(revlist)

    real(kind=8), dimension(:), intent(in)                 :: list
    real(kind=8), dimension(lbound(list,1):ubound(list,1)) :: revlist
    
    revlist = list(ubound(list,1):lbound(list,1):-1)

  end function reverse_double

  pure function reverse_string (list) result(revlist)

    character(len=*), dimension(:), intent(in)                 :: list
    character(len=len(list)), dimension(lbound(list,1):ubound(list,1)) :: revlist
    
    revlist = list(ubound(list,1):lbound(list,1):-1)

  end function reverse_string

  RECURSIVE SUBROUTINE quick_sort(array, order)

    ! Quick sort routine from:
    ! Brainerd, W.S., Goldberg, C.H. & Adams, J.C. (1990) "Programmer's Guide to
    ! Fortran 90", McGraw-Hill  ISBN 0-07-000248-7, pages 149-150.
    ! Modified by Alan Miller to include an associated integer array which gives
    ! the positions of the elements in the original order.

    IMPLICIT NONE
    REAL, DIMENSION (:), INTENT(IN)      :: array
    INTEGER, DIMENSION (:), INTENT(OUT)  :: order

    ! Local variable
    INTEGER :: i
    REAL, DIMENSION (size(array)) :: list

    DO i = 1, SIZE(list)
       order(i) = i
       list(i) = array(i)
    END DO

    CALL quick_sort_1(1, SIZE(list))

  CONTAINS

    RECURSIVE SUBROUTINE quick_sort_1(left_end, right_end)

      INTEGER, INTENT(IN) :: left_end, right_end

      !     Local variables
      INTEGER             :: i, j, itemp
      REAL                :: reference, temp
      INTEGER, PARAMETER  :: max_simple_sort_size = 6

      IF (right_end < left_end + max_simple_sort_size) THEN
         ! Use interchange sort for small lists
         CALL interchange_sort(left_end, right_end)

      ELSE
         ! Use partition ("quick") sort
         reference = list((left_end + right_end)/2)
         i = left_end - 1; j = right_end + 1

         DO
            ! Scan list from left end until element >= reference is found
            DO
               i = i + 1
               IF (list(i) >= reference) EXIT
            END DO
            ! Scan list from right end until element <= reference is found
            DO
               j = j - 1
               IF (list(j) <= reference) EXIT
            END DO


            IF (i < j) THEN
               ! Swap two out-of-order elements
               temp = list(i); list(i) = list(j); list(j) = temp
               itemp = order(i); order(i) = order(j); order(j) = itemp
            ELSE IF (i == j) THEN
               i = i + 1
               EXIT
            ELSE
               EXIT
            END IF
         END DO

         IF (left_end < j) CALL quick_sort_1(left_end, j)
         IF (i < right_end) CALL quick_sort_1(i, right_end)
      END IF

    END SUBROUTINE quick_sort_1


    SUBROUTINE interchange_sort(left_end, right_end)

      INTEGER, INTENT(IN) :: left_end, right_end

      !     Local variables
      INTEGER             :: i, j, itemp
      REAL                :: temp

      DO i = left_end, right_end - 1
         DO j = i+1, right_end
            IF (list(i) > list(j)) THEN
               temp = list(i); list(i) = list(j); list(j) = temp
               itemp = order(i); order(i) = order(j); order(j) = itemp
            END IF
         END DO
      END DO

    END SUBROUTINE interchange_sort

  END SUBROUTINE quick_sort

  function qsortd_integer(x) result(ind)

    ! Code converted using TO_F90 by Alan Miller
    ! Date: 2002-12-18  Time: 11:55:47

    IMPLICIT NONE

    INTEGER, INTENT(IN)  :: x(:)
    INTEGER :: ind(size(x))
    INTEGER :: n

    !***************************************************************************

    !                                                         ROBERT RENKA
    !                                                 OAK RIDGE NATL. LAB.

    !   THIS SUBROUTINE USES AN ORDER N*LOG(N) QUICK SORT TO SORT A REAL (dp)
    ! ARRAY X INTO INCREASING ORDER.  THE ALGORITHM IS AS FOLLOWS.  IND IS
    ! INITIALIZED TO THE ORDERED SEQUENCE OF INDICES 1,...,N, AND ALL INTERCHANGES
    ! ARE APPLIED TO IND.  X IS DIVIDED INTO TWO PORTIONS BY PICKING A CENTRAL
    ! ELEMENT T.  THE FIRST AND LAST ELEMENTS ARE COMPARED WITH T, AND
    ! INTERCHANGES ARE APPLIED AS NECESSARY SO THAT THE THREE VALUES ARE IN
    ! ASCENDING ORDER.  INTERCHANGES ARE THEN APPLIED SO THAT ALL ELEMENTS
    ! GREATER THAN T ARE IN THE UPPER PORTION OF THE ARRAY AND ALL ELEMENTS
    ! LESS THAN T ARE IN THE LOWER PORTION.  THE UPPER AND LOWER INDICES OF ONE
    ! OF THE PORTIONS ARE SAVED IN LOCAL ARRAYS, AND THE PROCESS IS REPEATED
    ! ITERATIVELY ON THE OTHER PORTION.  WHEN A PORTION IS COMPLETELY SORTED,
    ! THE PROCESS BEGINS AGAIN BY RETRIEVING THE INDICES BOUNDING ANOTHER
    ! UNSORTED PORTION.

    ! INPUT PARAMETERS -   N - LENGTH OF THE ARRAY X.

    !                      X - VECTOR OF LENGTH N TO BE SORTED.

    !                    IND - VECTOR OF LENGTH >= N.

    ! N AND X ARE NOT ALTERED BY THIS ROUTINE.

    ! OUTPUT PARAMETER - IND - SEQUENCE OF INDICES 1,...,N PERMUTED IN THE SAME
    !                          FASHION AS X WOULD BE.  THUS, THE ORDERING ON
    !                          X IS DEFINED BY Y(I) = X(IND(I)).

    !*********************************************************************

    ! NOTE -- IU AND IL MUST BE DIMENSIONED >= LOG(N) WHERE LOG HAS BASE 2.

    !*********************************************************************

    INTEGER   :: iu(21), il(21)
    INTEGER   :: m, i, j, k, l, ij, it, itt, indx
    REAL      :: r
    ! REAL (dp) :: t
    INTEGER :: t

    n = size(x)

    ! LOCAL PARAMETERS -

    ! IU,IL =  TEMPORARY STORAGE FOR THE UPPER AND LOWER
    !            INDICES OF PORTIONS OF THE ARRAY X
    ! M =      INDEX FOR IU AND IL
    ! I,J =    LOWER AND UPPER INDICES OF A PORTION OF X
    ! K,L =    INDICES IN THE RANGE I,...,J
    ! IJ =     RANDOMLY CHOSEN INDEX BETWEEN I AND J
    ! IT,ITT = TEMPORARY STORAGE FOR INTERCHANGES IN IND
    ! INDX =   TEMPORARY INDEX FOR X
    ! R =      PSEUDO RANDOM NUMBER FOR GENERATING IJ
    ! T =      CENTRAL ELEMENT OF X

    IF (n <= 0) RETURN

    ! INITIALIZE IND, M, I, J, AND R

    DO  i = 1, n
       ind(i) = i
    END DO
    m = 1
    i = 1
    j = n
    r = .375

    ! TOP OF LOOP

20  IF (i >= j) GO TO 70
    IF (r <= .5898437) THEN
       r = r + .0390625
    ELSE
       r = r - .21875
    END IF

    ! INITIALIZE K

30  k = i

    ! SELECT A CENTRAL ELEMENT OF X AND SAVE IT IN T

    ij = i + r*(j-i)
    it = ind(ij)
    t = x(it)

    ! IF THE FIRST ELEMENT OF THE ARRAY IS GREATER THAN T,
    !   INTERCHANGE IT WITH T

    indx = ind(i)
    IF (x(indx) > t) THEN
       ind(ij) = indx
       ind(i) = it
       it = indx
       t = x(it)
    END IF

    ! INITIALIZE L

    l = j

    ! IF THE LAST ELEMENT OF THE ARRAY IS LESS THAN T,
    !   INTERCHANGE IT WITH T

    indx = ind(j)
    IF (x(indx) >= t) GO TO 50
    ind(ij) = indx
    ind(j) = it
    it = indx
    t = x(it)

    ! IF THE FIRST ELEMENT OF THE ARRAY IS GREATER THAN T,
    !   INTERCHANGE IT WITH T

    indx = ind(i)
    IF (x(indx) <= t) GO TO 50
    ind(ij) = indx
    ind(i) = it
    it = indx
    t = x(it)
    GO TO 50

    ! INTERCHANGE ELEMENTS K AND L

40  itt = ind(l)
    ind(l) = ind(k)
    ind(k) = itt

    ! FIND AN ELEMENT IN THE UPPER PART OF THE ARRAY WHICH IS
    !   NOT LARGER THAN T

50  l = l - 1
    indx = ind(l)
    IF (x(indx) > t) GO TO 50

    ! FIND AN ELEMENT IN THE LOWER PART OF THE ARRAY WHCIH IS NOT SMALLER THAN T

60  k = k + 1
    indx = ind(k)
    IF (x(indx) < t) GO TO 60

    ! IF K <= L, INTERCHANGE ELEMENTS K AND L

    IF (k <= l) GO TO 40

    ! SAVE THE UPPER AND LOWER SUBSCRIPTS OF THE PORTION OF THE
    !   ARRAY YET TO BE SORTED

    IF (l-i > j-k) THEN
       il(m) = i
       iu(m) = l
       i = k
       m = m + 1
       GO TO 80
    END IF

    il(m) = k
    iu(m) = j
    j = l
    m = m + 1
    GO TO 80

    ! BEGIN AGAIN ON ANOTHER UNSORTED PORTION OF THE ARRAY

70  m = m - 1
    IF (m == 0) RETURN
    i = il(m)
    j = iu(m)

80  IF (j-i >= 11) GO TO 30
    IF (i == 1) GO TO 20
    i = i - 1

    ! SORT ELEMENTS I+1,...,J.  NOTE THAT 1 <= I < J AND J-I < 11.

90  i = i + 1
    IF (i == j) GO TO 70
    indx = ind(i+1)
    t = x(indx)
    it = indx
    indx = ind(i)
    IF (x(indx) <= t) GO TO 90
    k = i

100 ind(k+1) = ind(k)
    k = k - 1
    indx = ind(k)
    IF (t < x(indx)) GO TO 100

    ind(k+1) = it
    GO TO 90
  end function qsortd_integer

  function qsortd_real(x) result(ind)

    ! Code converted using TO_F90 by Alan Miller
    ! Date: 2002-12-18  Time: 11:55:47

    IMPLICIT NONE
    ! INTEGER, PARAMETER  :: dp = SELECTED_REAL_KIND(12, 60)
    INTEGER, PARAMETER  :: dp = rs_kind

    REAL (dp), INTENT(IN)  :: x(:)

    INTEGER :: ind(size(x))
    INTEGER :: n

    !***************************************************************************

    !                                                         ROBERT RENKA
    !                                                 OAK RIDGE NATL. LAB.

    !   THIS SUBROUTINE USES AN ORDER N*LOG(N) QUICK SORT TO SORT A REAL (dp)
    ! ARRAY X INTO INCREASING ORDER.  THE ALGORITHM IS AS FOLLOWS.  IND IS
    ! INITIALIZED TO THE ORDERED SEQUENCE OF INDICES 1,...,N, AND ALL INTERCHANGES
    ! ARE APPLIED TO IND.  X IS DIVIDED INTO TWO PORTIONS BY PICKING A CENTRAL
    ! ELEMENT T.  THE FIRST AND LAST ELEMENTS ARE COMPARED WITH T, AND
    ! INTERCHANGES ARE APPLIED AS NECESSARY SO THAT THE THREE VALUES ARE IN
    ! ASCENDING ORDER.  INTERCHANGES ARE THEN APPLIED SO THAT ALL ELEMENTS
    ! GREATER THAN T ARE IN THE UPPER PORTION OF THE ARRAY AND ALL ELEMENTS
    ! LESS THAN T ARE IN THE LOWER PORTION.  THE UPPER AND LOWER INDICES OF ONE
    ! OF THE PORTIONS ARE SAVED IN LOCAL ARRAYS, AND THE PROCESS IS REPEATED
    ! ITERATIVELY ON THE OTHER PORTION.  WHEN A PORTION IS COMPLETELY SORTED,
    ! THE PROCESS BEGINS AGAIN BY RETRIEVING THE INDICES BOUNDING ANOTHER
    ! UNSORTED PORTION.

    ! INPUT PARAMETERS -   N - LENGTH OF THE ARRAY X.

    !                      X - VECTOR OF LENGTH N TO BE SORTED.

    !                    IND - VECTOR OF LENGTH >= N.

    ! N AND X ARE NOT ALTERED BY THIS ROUTINE.

    ! OUTPUT PARAMETER - IND - SEQUENCE OF INDICES 1,...,N PERMUTED IN THE SAME
    !                          FASHION AS X WOULD BE.  THUS, THE ORDERING ON
    !                          X IS DEFINED BY Y(I) = X(IND(I)).

    !*********************************************************************

    ! NOTE -- IU AND IL MUST BE DIMENSIONED >= LOG(N) WHERE LOG HAS BASE 2.

    !*********************************************************************

    INTEGER   :: iu(21), il(21)
    INTEGER   :: m, i, j, k, l, ij, it, itt, indx
    REAL      :: r
    REAL (dp) :: t

    n = size(x)

    ! LOCAL PARAMETERS -

    ! IU,IL =  TEMPORARY STORAGE FOR THE UPPER AND LOWER
    !            INDICES OF PORTIONS OF THE ARRAY X
    ! M =      INDEX FOR IU AND IL
    ! I,J =    LOWER AND UPPER INDICES OF A PORTION OF X
    ! K,L =    INDICES IN THE RANGE I,...,J
    ! IJ =     RANDOMLY CHOSEN INDEX BETWEEN I AND J
    ! IT,ITT = TEMPORARY STORAGE FOR INTERCHANGES IN IND
    ! INDX =   TEMPORARY INDEX FOR X
    ! R =      PSEUDO RANDOM NUMBER FOR GENERATING IJ
    ! T =      CENTRAL ELEMENT OF X

    IF (n <= 0) RETURN

    ! INITIALIZE IND, M, I, J, AND R

    DO  i = 1, n
       ind(i) = i
    END DO
    m = 1
    i = 1
    j = n
    r = .375

    ! TOP OF LOOP

20  IF (i >= j) GO TO 70
    IF (r <= .5898437) THEN
       r = r + .0390625
    ELSE
       r = r - .21875
    END IF

    ! INITIALIZE K

30  k = i

    ! SELECT A CENTRAL ELEMENT OF X AND SAVE IT IN T

    ij = i + r*(j-i)
    it = ind(ij)
    t = x(it)

    ! IF THE FIRST ELEMENT OF THE ARRAY IS GREATER THAN T,
    !   INTERCHANGE IT WITH T

    indx = ind(i)
    IF (x(indx) > t) THEN
       ind(ij) = indx
       ind(i) = it
       it = indx
       t = x(it)
    END IF

    ! INITIALIZE L

    l = j

    ! IF THE LAST ELEMENT OF THE ARRAY IS LESS THAN T,
    !   INTERCHANGE IT WITH T

    indx = ind(j)
    IF (x(indx) >= t) GO TO 50
    ind(ij) = indx
    ind(j) = it
    it = indx
    t = x(it)

    ! IF THE FIRST ELEMENT OF THE ARRAY IS GREATER THAN T,
    !   INTERCHANGE IT WITH T

    indx = ind(i)
    IF (x(indx) <= t) GO TO 50
    ind(ij) = indx
    ind(i) = it
    it = indx
    t = x(it)
    GO TO 50

    ! INTERCHANGE ELEMENTS K AND L

40  itt = ind(l)
    ind(l) = ind(k)
    ind(k) = itt

    ! FIND AN ELEMENT IN THE UPPER PART OF THE ARRAY WHICH IS
    !   NOT LARGER THAN T

50  l = l - 1
    indx = ind(l)
    IF (x(indx) > t) GO TO 50

    ! FIND AN ELEMENT IN THE LOWER PART OF THE ARRAY WHCIH IS NOT SMALLER THAN T

60  k = k + 1
    indx = ind(k)
    IF (x(indx) < t) GO TO 60

    ! IF K <= L, INTERCHANGE ELEMENTS K AND L

    IF (k <= l) GO TO 40

    ! SAVE THE UPPER AND LOWER SUBSCRIPTS OF THE PORTION OF THE
    !   ARRAY YET TO BE SORTED

    IF (l-i > j-k) THEN
       il(m) = i
       iu(m) = l
       i = k
       m = m + 1
       GO TO 80
    END IF

    il(m) = k
    iu(m) = j
    j = l
    m = m + 1
    GO TO 80

    ! BEGIN AGAIN ON ANOTHER UNSORTED PORTION OF THE ARRAY

70  m = m - 1
    IF (m == 0) RETURN
    i = il(m)
    j = iu(m)

80  IF (j-i >= 11) GO TO 30
    IF (i == 1) GO TO 20
    i = i - 1

    ! SORT ELEMENTS I+1,...,J.  NOTE THAT 1 <= I < J AND J-I < 11.

90  i = i + 1
    IF (i == j) GO TO 70
    indx = ind(i+1)
    t = x(indx)
    it = indx
    indx = ind(i)
    IF (x(indx) <= t) GO TO 90
    k = i

100 ind(k+1) = ind(k)
    k = k - 1
    indx = ind(k)
    IF (t < x(indx)) GO TO 100

    ind(k+1) = it
    GO TO 90
  END function qsortd_real

  function qsortd_double(x) result(ind)

    ! Code converted using TO_F90 by Alan Miller
    ! Date: 2002-12-18  Time: 11:55:47

    IMPLICIT NONE
    ! INTEGER, PARAMETER  :: dp = SELECTED_REAL_KIND(12, 60)
    INTEGER, PARAMETER  :: dp = rd_kind

    REAL (dp), INTENT(IN)  :: x(:)

    INTEGER :: ind(size(x))
    INTEGER :: n

    !***************************************************************************

    !                                                         ROBERT RENKA
    !                                                 OAK RIDGE NATL. LAB.

    !   THIS SUBROUTINE USES AN ORDER N*LOG(N) QUICK SORT TO SORT A REAL (dp)
    ! ARRAY X INTO INCREASING ORDER.  THE ALGORITHM IS AS FOLLOWS.  IND IS
    ! INITIALIZED TO THE ORDERED SEQUENCE OF INDICES 1,...,N, AND ALL INTERCHANGES
    ! ARE APPLIED TO IND.  X IS DIVIDED INTO TWO PORTIONS BY PICKING A CENTRAL
    ! ELEMENT T.  THE FIRST AND LAST ELEMENTS ARE COMPARED WITH T, AND
    ! INTERCHANGES ARE APPLIED AS NECESSARY SO THAT THE THREE VALUES ARE IN
    ! ASCENDING ORDER.  INTERCHANGES ARE THEN APPLIED SO THAT ALL ELEMENTS
    ! GREATER THAN T ARE IN THE UPPER PORTION OF THE ARRAY AND ALL ELEMENTS
    ! LESS THAN T ARE IN THE LOWER PORTION.  THE UPPER AND LOWER INDICES OF ONE
    ! OF THE PORTIONS ARE SAVED IN LOCAL ARRAYS, AND THE PROCESS IS REPEATED
    ! ITERATIVELY ON THE OTHER PORTION.  WHEN A PORTION IS COMPLETELY SORTED,
    ! THE PROCESS BEGINS AGAIN BY RETRIEVING THE INDICES BOUNDING ANOTHER
    ! UNSORTED PORTION.

    ! INPUT PARAMETERS -   N - LENGTH OF THE ARRAY X.

    !                      X - VECTOR OF LENGTH N TO BE SORTED.

    !                    IND - VECTOR OF LENGTH >= N.

    ! N AND X ARE NOT ALTERED BY THIS ROUTINE.

    ! OUTPUT PARAMETER - IND - SEQUENCE OF INDICES 1,...,N PERMUTED IN THE SAME
    !                          FASHION AS X WOULD BE.  THUS, THE ORDERING ON
    !                          X IS DEFINED BY Y(I) = X(IND(I)).

    !*********************************************************************

    ! NOTE -- IU AND IL MUST BE DIMENSIONED >= LOG(N) WHERE LOG HAS BASE 2.

    !*********************************************************************

    INTEGER   :: iu(21), il(21)
    INTEGER   :: m, i, j, k, l, ij, it, itt, indx
    REAL      :: r
    REAL (dp) :: t

    n = size(x)

    ! LOCAL PARAMETERS -

    ! IU,IL =  TEMPORARY STORAGE FOR THE UPPER AND LOWER
    !            INDICES OF PORTIONS OF THE ARRAY X
    ! M =      INDEX FOR IU AND IL
    ! I,J =    LOWER AND UPPER INDICES OF A PORTION OF X
    ! K,L =    INDICES IN THE RANGE I,...,J
    ! IJ =     RANDOMLY CHOSEN INDEX BETWEEN I AND J
    ! IT,ITT = TEMPORARY STORAGE FOR INTERCHANGES IN IND
    ! INDX =   TEMPORARY INDEX FOR X
    ! R =      PSEUDO RANDOM NUMBER FOR GENERATING IJ
    ! T =      CENTRAL ELEMENT OF X

    IF (n <= 0) RETURN

    ! INITIALIZE IND, M, I, J, AND R

    DO  i = 1, n
       ind(i) = i
    END DO
    m = 1
    i = 1
    j = n
    r = .375

    ! TOP OF LOOP

20  IF (i >= j) GO TO 70
    IF (r <= .5898437) THEN
       r = r + .0390625
    ELSE
       r = r - .21875
    END IF

    ! INITIALIZE K

30  k = i

    ! SELECT A CENTRAL ELEMENT OF X AND SAVE IT IN T

    ij = i + r*(j-i)
    it = ind(ij)
    t = x(it)

    ! IF THE FIRST ELEMENT OF THE ARRAY IS GREATER THAN T,
    !   INTERCHANGE IT WITH T

    indx = ind(i)
    IF (x(indx) > t) THEN
       ind(ij) = indx
       ind(i) = it
       it = indx
       t = x(it)
    END IF

    ! INITIALIZE L

    l = j

    ! IF THE LAST ELEMENT OF THE ARRAY IS LESS THAN T,
    !   INTERCHANGE IT WITH T

    indx = ind(j)
    IF (x(indx) >= t) GO TO 50
    ind(ij) = indx
    ind(j) = it
    it = indx
    t = x(it)

    ! IF THE FIRST ELEMENT OF THE ARRAY IS GREATER THAN T,
    !   INTERCHANGE IT WITH T

    indx = ind(i)
    IF (x(indx) <= t) GO TO 50
    ind(ij) = indx
    ind(i) = it
    it = indx
    t = x(it)
    GO TO 50

    ! INTERCHANGE ELEMENTS K AND L

40  itt = ind(l)
    ind(l) = ind(k)
    ind(k) = itt

    ! FIND AN ELEMENT IN THE UPPER PART OF THE ARRAY WHICH IS
    !   NOT LARGER THAN T

50  l = l - 1
    indx = ind(l)
    IF (x(indx) > t) GO TO 50

    ! FIND AN ELEMENT IN THE LOWER PART OF THE ARRAY WHCIH IS NOT SMALLER THAN T

60  k = k + 1
    indx = ind(k)
    IF (x(indx) < t) GO TO 60

    ! IF K <= L, INTERCHANGE ELEMENTS K AND L

    IF (k <= l) GO TO 40

    ! SAVE THE UPPER AND LOWER SUBSCRIPTS OF THE PORTION OF THE
    !   ARRAY YET TO BE SORTED

    IF (l-i > j-k) THEN
       il(m) = i
       iu(m) = l
       i = k
       m = m + 1
       GO TO 80
    END IF

    il(m) = k
    iu(m) = j
    j = l
    m = m + 1
    GO TO 80

    ! BEGIN AGAIN ON ANOTHER UNSORTED PORTION OF THE ARRAY

70  m = m - 1
    IF (m == 0) RETURN
    i = il(m)
    j = iu(m)

80  IF (j-i >= 11) GO TO 30
    IF (i == 1) GO TO 20
    i = i - 1

    ! SORT ELEMENTS I+1,...,J.  NOTE THAT 1 <= I < J AND J-I < 11.

90  i = i + 1
    IF (i == j) GO TO 70
    indx = ind(i+1)
    t = x(indx)
    it = indx
    indx = ind(i)
    IF (x(indx) <= t) GO TO 90
    k = i

100 ind(k+1) = ind(k)
    k = k - 1
    indx = ind(k)
    IF (t < x(indx)) GO TO 100

    ind(k+1) = it
    GO TO 90
  END function qsortd_double

end module sort_functions
