# Supplementary material for: A Process for Modelling Diffuse Scattering from Disordered Molecular Crystals, Illustrated by Application to Monoclinic 9-Chloro-10-methylanthracene
Source: Hindawi journal article supplement (doi:10.1155/2015/878463), 2015-01-01
Supplement: f2 [file 878463.f2.zip › 878463.f2/progs/ZMC_source/variable_array.f90]

module variable_array

  use iso_varying_string

  implicit none

  private

  ! This module provides functionality that is similar to the perl
  ! array functions shift, unshift, pop, push and splice. These
  ! operators can be used freely on pointer integer, real, double,
  ! character and logical arrays of rank 1 to provide a dynamic array 
  ! functionality. This is particularly useful for applications where 
  ! the length of the given array is likely to grow and shrink in a 
  ! dynamic way. This module has NOT been written with performance in 
  ! mind. Complete copies are done every time an element is added or 
  ! deleted from an array. This is not a particularly expensive operation 
  ! with arrays of less than 1000 or so elements, but don't use these 
  ! operators in the middle of a Monte Carlo loop!

  !! $Log: variable_array.f90,v $
  !! Revision 1.5  2004/09/07 05:15:39  aidan
  !! Made debug a parameter so that it can be optimised out of the object code.
  !!
  !! Revision 1.4  2003/09/16 00:09:53  aidan
  !! Added support for logical arrays.
  !!
  !! Revision 1.3  2003/09/12 02:02:04  aidan
  !! Added support for varying strings and fixed a bug (replicated through all
  !! the splice functions) where I hadn't specified the indices of the buffer
  !! array I was copying existing elements into--also incorrectly calculated
  !! the upper bound that we were copying from. I am still not sure why it worked
  !! at all. This bug only came to light when I added the varying string support.
  !!
  !! Revision 1.2  2003/09/05 05:34:35  aidan
  !! Can now use these functions on real and character arrays. Character arrays
  !! are an order of magnitude slower to manipulate than integer and real arrays.
  !!
  !! Revision 1.1  2003/08/21 01:52:52  aidan
  !! Initial revision
  !!:

  ! Revision control software updates this character parameter.
  ! The 'ident' command can extract this version string from an
  ! object file or executable, which means one can identify which
  ! version of the module was used to compile it.
  character(len=*), parameter :: version = "$Id: variable_array.f90,v 1.5 2004/09/07 05:15:39 aidan Exp aidan $"

  ! Splice is the general function which is called by the other, specialised 
  ! functions below. This is an interface to integer, real, character and 
  ! varying string splice functions.
  interface splice
     module procedure splice_integer, splice_real, splice_character, splice_vstring, &
          splice_char_into_vstring, splice_logical
  end interface

  ! Place an element or an array of elements on to the end of our array. Returns
  ! the current length of the array.
  interface push
     module procedure push_integer, push_integer_array, push_real, push_real_array, &
          push_character, push_character_array, push_vstring, push_vstring_array, &
          push_char_onto_vstring, push_char_array_onto_vstring, push_logical, push_logical_array
  end interface

  ! Remove an element off the end of our array and return it.
  interface pop
     module procedure pop_integer, pop_real, pop_character, pop_vstring, pop_logical
  end interface

  ! Place an element or an array of elements at the beginning of our array, and shifting
  ! up the index value of all existing elements. Returns the current length of the array.
  interface unshift
     module procedure unshift_integer, unshift_integer_array, unshift_real, unshift_real_array, &
          unshift_character, unshift_character_array, unshift_vstring, unshift_vstring_array, & 
          unshift_char_onto_vstring, unshift_char_array_onto_vstring, unshift_logical, unshift_logical_array
  end interface

  ! Remove an element off the beginning of our array and return it--the index of all 
  ! other elements are shifted down.
  interface shift
     module procedure shift_integer, shift_real, shift_character, shift_vstring, shift_logical
  end interface

  ! Public routines
  public :: splice, push, pop, unshift, shift

  logical, parameter :: debug = .FALSE.

contains

  integer function splice_integer (array, offset, length, list) result(array_length)

    ! This function is meant to emulate the perl function 'splice' but on a
    ! pointer integer array. So, here is the info on the perl function
    ! with some modification:
    !
  
    !   splice ARRAY,OFFSET,LENGTH,LIST
    !   splice ARRAY,OFFSET,LENGTH
    !   splice ARRAY,OFFSET
    !   splice ARRAY
    !           Removes the elements designated by OFFSET (from the lower bound of
    !           the array) and LENGTH from an
    !           array, and replaces them with the elements of LIST, if any.  
    !           Returns the number of elements removed in the array. The array 
    !           grows or shrinks as necessary.
    !           If OFFSET is negative then it starts that far from the end of the
    !           array.  If LENGTH is omitted, removes everything from OFFSET
    !           onward.  If LENGTH is negative, leaves that many elements off the
    !           end of the array.  If both OFFSET and LENGTH are omitted, removes
    !           everything.
    !
    !           The following equivalences hold (assuming the lower bound of array 
    !           is zero):
    !
    !               push(array,x)          splice(array,size(array)+1,0,x)
    !               push(array,(/x,y/))    splice(array,size(array)+1,0,(/x,y/))
    !               pop(array)             splice(array,-1)
    !               shift(array)           splice(array,0,1)
    !               unshift(array,x)       splice(array,0,0,x)
    !               array(x) = y           splice(array,x,1,y)

    ! The main differences between the perl version and this one are the definition
    ! of offset and the return value of the function. Here offset is a length from 
    ! the lower bound of the array (in perl it is an absolute position). This is
    ! so that we can usefully use arrays which start with lower bounds less than zero,
    ! as we want a negative offset to indicate counting from the end of an array.

    ! Some useful equalities to bear in mind when reading this code:
    !
    !          length of array = last element - first element + 1
    !          nth element of array = first element + n - 1

    integer, dimension(:), pointer  :: array
    integer, intent(in), optional   :: offset, length
    integer, dimension(:), optional :: list

    integer, dimension(:), pointer :: buffer_array

    integer :: status, current_length, new_offset
    integer :: replace_length, new_length, lower, tail

    logical ::  array_associated

    array_length = 0

    if (present(offset)) then

       if (associated(array)) then
          ! Grab the number of elements in array
          current_length = size(array)
          ! And the index that the array starts at
          lower = lbound(array,1)
          array_associated = .true.
       else
          ! The array isn't associated, so we set the length to zero
          current_length = 0
          ! Assume the array index starts at one
          lower = 1
          array_associated = .false.
       end if
       if (debug) print *,'Current_length: ',current_length
       if (debug) print *,'Lower bound: ',lower

       ! We don't want to alter the return value of offset so we need to
       ! make a local version of it
       new_offset = offset

       ! A negative offset means we count from the end of the array, and
       ! -1 means the last entry of the array
       if (new_offset < 0) then
          new_offset = lower + current_length + new_offset
          if (new_offset < lower) new_offset = lower
       else
          ! Convert our offset from a relative to an absolute position
          new_offset = lower + new_offset
       end if
       if (debug) print *,'Offset: ',new_offset

       ! We don't want to alter the return value of length so we need to
       ! make a local version of it too
       if (present(length)) then
          new_length = length
          ! Tail is the number of elements left at the end of the array
          ! after offset + length elements have been removed
          tail = max(0,(lower + current_length - 1) - (new_offset + new_length - 1))
       else
          ! No length, so the new_length is to the end of the array, and
          ! there are no tail elements
          new_length = (lower + current_length - 1) - new_offset + 1
          tail = 0
       end if
       if (debug) print *,'Length: ',new_length
       if (debug) print *,'Tail: ',tail

       ! Replace length is the length of list we will put back into
       ! the array to replace the elements we are snipping out. This
       ! is initialised to zero as we are not even required to provide
       ! a replacement list
       replace_length = 0
       if (present(list)) then
          replace_length = size(list)
       end if
       if (debug) print *,'Replace length: ',replace_length

       ! Make a new array that is one less than the offset length plus
       ! the length of the list we are stuffing in plus whatever is left
       ! on the end
       ! allocate(buffer_array(lower:(lower-1)+(new_offset-1)+replace_length+tail), stat=status)
       allocate(buffer_array(lower:lower + &
            (((new_offset-1)-lower+1)+replace_length+tail) & ! length of new array
            - 1 ), stat=status)
       if (status /= 0) then
          print *,'module variable_array :: Error in allocating space for buffer array: ',status
          stop
       end if
       ! buffer_array = -9
       if (debug) print *,'Length of new array: ',size(buffer_array)

       ! Copy over everything up to (not including) offset as long as our
       ! new offset is greater than the start of the array (if not then we
       ! are probably shifting something on to the start of the array)
       if (array_associated .and. (new_offset > lower)) then
          buffer_array(lower:new_offset-1) = array(lower:new_offset-1)
          if (debug) print *,'First bit: ', array(lower:new_offset-1), buffer_array
       end if

       ! If we had a list to insert then place it now. Note that we use
       ! the replace length here ...
       if (present(list)) then
          buffer_array(new_offset:new_offset+replace_length-1) = list
          if (debug) print *,'List bit: ', buffer_array
       end if

       ! If we had elements left on the tail of array then place them on the 
       ! end. Note that we use replace length on the left and new length on
       ! the right. In this way we specify how much space our inserted text
       ! takes -- which can be as low as zero, which implies an insertion and
       ! not a deletion operation
       if (tail > 0) then
          buffer_array(new_offset+replace_length:) = array(new_offset+new_length:)
          if (debug) print *,'Tail bit: ', buffer_array
       end if

       ! Delete the original
       if (array_associated) deallocate(array)

       ! Associate array with the new version
       array => buffer_array

       array_length = size(array)

    else
       nullify(array)
    end if

  end function splice_integer

  integer function push_integer (array, argument) result(array_length)

    integer, dimension(:), pointer :: array
    integer, intent(in)            :: argument

    ! Make an array of length one out of single argument and push
    ! this (calls array push function below)
    array_length = push(array,(/ argument /))

  end function push_integer

  integer function push_integer_array (array, argument) result(array_length)

    integer, dimension(:), pointer :: array
    integer, dimension(:), intent(in) :: argument

    integer :: current_size

    current_size = 0

    ! Grab the number of elements in array
    if (associated(array)) current_size = size(array)

    array_length = splice(array,current_size,0,argument)

  end function push_integer_array

  integer function pop_integer (array, status) result(popped)

    integer, dimension(:), pointer :: array
    logical, optional, intent(out) :: status

    integer :: current_size

    ! Grab the number of elements in array
    if (.not. associated(array)) then
       if (present(status)) then
          status = .false.
       else
          print *,'pop :: Attempted to access zero size array!'
          stop
       end if
    else
       if (present(status)) status = .true.
       popped = array(ubound(array,1))
       ! Remove the last element from the array
       current_size = splice(array,-1)
    end if

  end function pop_integer

  integer function unshift_integer (array, argument) result(array_length)

    integer, dimension(:), pointer :: array
    integer, intent(in)            :: argument

    ! Make an array of length one out of single argument and unshift
    ! this (calls array unshift function below)
    array_length = unshift(array,(/ argument /))

  end function unshift_integer

  integer function unshift_integer_array (array, argument) result(array_length)

    integer, dimension(:), pointer    :: array
    integer, dimension(:), intent(in) :: argument

    integer :: start

    start = 0

    ! Find the first element (lower bound) in the array
    if (associated(array)) start = lbound(array,1)

    array_length = splice(array,0,0,argument)

  end function unshift_integer_array

  integer function shift_integer (array, status) result(shifted)

    integer, dimension(:), pointer :: array
    logical, optional, intent(out) :: status

    integer :: current_size, lower

    ! Grab the number of elements in array
    if (.not. associated(array)) then
       if (present(status)) then
          status = .false.
       else
          print *,'pop :: Attempted to access zero size array!'
          stop
       end if
    else
       if (present(status)) status = .true.
       shifted = array(lbound(array,1))
       ! Remove the first element from the array (recall that offset
       ! is relative to the lower bound, so 0 = lower bound of array)
       current_size = splice(array,0,1)
    end if

  end function shift_integer

  integer function splice_real (array, offset, length, list) result(array_length)

    ! This function is meant to emulate the perl function 'splice' but on a
    ! pointer real array. So, here is the info on the perl function
    ! with some modification:
    !
  
    !   splice ARRAY,OFFSET,LENGTH,LIST
    !   splice ARRAY,OFFSET,LENGTH
    !   splice ARRAY,OFFSET
    !   splice ARRAY
    !           Removes the elements designated by OFFSET (from the lower bound of
    !           the array) and LENGTH from an
    !           array, and replaces them with the elements of LIST, if any.  
    !           Returns the number of elements removed in the array. The array 
    !           grows or shrinks as necessary.
    !           If OFFSET is negative then it starts that far from the end of the
    !           array.  If LENGTH is omitted, removes everything from OFFSET
    !           onward.  If LENGTH is negative, leaves that many elements off the
    !           end of the array.  If both OFFSET and LENGTH are omitted, removes
    !           everything.
    !
    !           The following equivalences hold (assuming the lower bound of array 
    !           is zero):
    !
    !               push(array,x)          splice(array,size(array)+1,0,x)
    !               push(array,(/x,y/))    splice(array,size(array)+1,0,(/x,y/))
    !               pop(array)             splice(array,-1)
    !               shift(array)           splice(array,0,1)
    !               unshift(array,x)       splice(array,0,0,x)
    !               array(x) = y           splice(array,x,1,y)

    ! The main differences between the perl version and this one are the definition
    ! of offset and the return value of the function. Here offset is a length from 
    ! the lower bound of the array (in perl it is an absolute position). This is
    ! so that we can usefully use arrays which start with lower bounds less than zero,
    ! as we want a negative offset to indicate counting from the end of an array.

    ! Some useful equalities to bear in mind when reading this code:
    !
    !          length of array = last element - first element + 1
    !          nth element of array = first element + n - 1

    real, dimension(:), pointer   :: array
    integer, intent(in), optional :: offset, length
    real, dimension(:), optional  :: list

    real, dimension(:), pointer :: buffer_array

    integer :: status, current_length, new_offset
    integer :: replace_length, new_length, lower, tail

    logical ::  array_associated

    array_length = 0

    if (present(offset)) then

       if (associated(array)) then
          ! Grab the number of elements in array
          current_length = size(array)
          ! And the index that the array starts at
          lower = lbound(array,1)
          array_associated = .true.
       else
          ! The array isn't associated, so we set the length to zero
          current_length = 0
          ! Assume the array index starts at one
          lower = 1
          array_associated = .false.
       end if
       if (debug) print *,'Current_length: ',current_length
       if (debug) print *,'Lower bound: ',lower

       ! We don't want to alter the return value of offset so we need to
       ! make a local version of it
       new_offset = offset

       ! A negative offset means we count from the end of the array, and
       ! -1 means the last entry of the array
       if (new_offset < 0) then
          new_offset = lower + current_length + new_offset
          if (new_offset < lower) new_offset = lower
       else
          ! Convert our offset from a relative to an absolute position
          new_offset = lower + new_offset
       end if
       if (debug) print *,'Offset: ',new_offset

       ! We don't want to alter the return value of length so we need to
       ! make a local version of it too
       if (present(length)) then
          new_length = length
          ! Tail is the number of elements left at the end of the array
          ! after offset + length elements have been removed
          tail = max(0,(lower + current_length - 1) - (new_offset + new_length - 1))
       else
          ! No length, so the new_length is to the end of the array, and
          ! there are no tail elements
          new_length = (lower + current_length - 1) - new_offset + 1
          tail = 0
       end if
       if (debug) print *,'Length: ',new_length
       if (debug) print *,'Tail: ',tail

       ! Replace length is the length of list we will put back into
       ! the array to replace the elements we are snipping out. This
       ! is initialised to zero as we are not even required to provide
       ! a replacement list
       replace_length = 0
       if (present(list)) then
          replace_length = size(list)
       end if
       if (debug) print *,'Replace length: ',replace_length

       ! Make a new array that is one less than the offset length plus
       ! the length of the list we are stuffing in plus whatever is left
       ! on the end
       ! allocate(buffer_array(lower:(lower-1)+(new_offset-1)+replace_length+tail), stat=status)
       allocate(buffer_array(lower:lower + &
            (((new_offset-1)-lower+1)+replace_length+tail) & ! length of new array
            - 1 ), stat=status)
       if (status /= 0) then
          print *,'module variable_array :: Error in allocating space for buffer array: ',status
          stop
       end if
       ! buffer_array = -9
       if (debug) print *,'Length of new array: ',size(buffer_array)

       ! Copy over everything up to (not including) offset as long as our
       ! new offset is greater than the start of the array (if not then we
       ! are probably shifting something on to the start of the array)
       if (array_associated .and. (new_offset > lower)) then
          buffer_array(lower:new_offset-1) = array(lower:new_offset-1)
          if (debug) print *,'First bit: ', buffer_array
       end if

       ! If we had a list to insert then place it now. Note that we use
       ! the replace length here ...
       if (present(list)) then
          buffer_array(new_offset:new_offset+replace_length-1) = list
          if (debug) print *,'List bit: ', buffer_array
       end if

       ! If we had elements left on the tail of array then place them on the 
       ! end. Note that we use replace length on the left and new length on
       ! the right. In this way we specify how much space our inserted text
       ! takes -- which can be as low as zero, which implies an insertion and
       ! not a deletion operation
       if (tail > 0) then
          buffer_array(new_offset+replace_length:) = array(new_offset+new_length:)
          if (debug) print *,'Tail bit: ', buffer_array
       end if

       ! Delete the original
       if (array_associated) deallocate(array)

       ! Associate array with the new version
       array => buffer_array

       array_length = size(array)

    else
       nullify(array)
    end if

  end function splice_real

  integer function push_real (array, argument) result(array_length)

    real, dimension(:), pointer :: array
    real, intent(in)            :: argument

    ! Make an array of length one out of single argument and push
    ! this (calls array push function below)
    array_length = push(array,(/ argument /))

  end function push_real

  integer function push_real_array (array, argument) result(array_length)

    real, dimension(:), pointer    :: array
    real, dimension(:), intent(in) :: argument

    integer :: current_size

    current_size = 0

    ! Grab the number of elements in array
    if (associated(array)) current_size = size(array)

    array_length = splice(array,current_size,0,argument)

  end function push_real_array

  real function pop_real (array, status) result(popped)

    real, dimension(:), pointer    :: array
    logical, optional, intent(out) :: status

    integer :: current_size

    ! Grab the number of elements in array
    if (.not. associated(array)) then
       if (present(status)) then
          status = .false.
       else
          print *,'pop :: Attempted to access zero size array!'
          stop
       end if
    else
       if (present(status)) status = .true.
       popped = array(ubound(array,1))
       ! Remove the last element from the array
       current_size = splice(array,-1)
    end if

  end function pop_real

  integer function unshift_real (array, argument) result(array_length)

    real, dimension(:), pointer :: array
    real, intent(in)            :: argument

    ! Make an array of length one out of single argument and unshift
    ! this (calls array unshift function below)
    array_length = unshift(array,(/ argument /))

  end function unshift_real

  integer function unshift_real_array (array, argument) result(array_length)

    real, dimension(:), pointer    :: array
    real, dimension(:), intent(in) :: argument

    integer :: start

    start = 0

    ! Find the first element (lower bound) in the array
    if (associated(array)) start = lbound(array,1)

    array_length = splice(array,0,0,argument)

  end function unshift_real_array

  real function shift_real (array, status) result(shifted)

    real, dimension(:), pointer    :: array
    logical, optional, intent(out) :: status

    integer :: current_size, lower

    ! Grab the number of elements in array
    if (.not. associated(array)) then
       if (present(status)) then
          status = .false.
       else
          print *,'pop :: Attempted to access zero size array!'
          stop
       end if
    else
       if (present(status)) status = .true.
       shifted = array(lbound(array,1))
       ! Remove the first element from the array (recall that offset
       ! is relative to the lower bound, so 0 = lower bound of array)
       current_size = splice(array,0,1)
    end if

  end function shift_real

  integer function splice_character (array, offset, length, list) result(array_length)

    ! This function is meant to emulate the perl function 'splice' but on a
    ! pointer character array. So, here is the info on the perl function
    ! with some modification:
    !
  
    !   splice ARRAY,OFFSET,LENGTH,LIST
    !   splice ARRAY,OFFSET,LENGTH
    !   splice ARRAY,OFFSET
    !   splice ARRAY
    !           Removes the elements designated by OFFSET (from the lower bound of
    !           the array) and LENGTH from an
    !           array, and replaces them with the elements of LIST, if any.  
    !           Returns the number of elements removed in the array. The array 
    !           grows or shrinks as necessary.
    !           If OFFSET is negative then it starts that far from the end of the
    !           array.  If LENGTH is omitted, removes everything from OFFSET
    !           onward.  If LENGTH is negative, leaves that many elements off the
    !           end of the array.  If both OFFSET and LENGTH are omitted, removes
    !           everything.
    !
    !           The following equivalences hold (assuming the lower bound of array 
    !           is zero):
    !
    !               push(array,x)          splice(array,size(array)+1,0,x)
    !               push(array,(/x,y/))    splice(array,size(array)+1,0,(/x,y/))
    !               pop(array)             splice(array,-1)
    !               shift(array)           splice(array,0,1)
    !               unshift(array,x)       splice(array,0,0,x)
    !               array(x) = y           splice(array,x,1,y)

    ! The main differences between the perl version and this one are the definition
    ! of offset and the return value of the function. Here offset is a length from 
    ! the lower bound of the array (in perl it is an absolute position). This is
    ! so that we can usefully use arrays which start with lower bounds less than zero,
    ! as we want a negative offset to indicate counting from the end of an array.

    ! Some useful equalities to bear in mind when reading this code:
    !
    !          length of array = last element - first element + 1
    !          nth element of array = first element + n - 1

    character(len=*), dimension(:), pointer  :: array
    integer, intent(in), optional            :: offset, length
    character(len=*), dimension(:), optional :: list

    character(len=len(array)), dimension(:), pointer :: buffer_array

    integer :: status, current_length, new_offset
    integer :: replace_length, new_length, lower, tail

    logical ::  array_associated

    array_length = 0

    if (present(offset)) then

       if (associated(array)) then
          ! Grab the number of elements in array
          current_length = size(array)
          ! And the index that the array starts at
          lower = lbound(array,1)
          array_associated = .true.
       else
          ! The array isn't associated, so we set the length to zero
          current_length = 0
          ! Assume the array index starts at one
          lower = 1
          array_associated = .false.
       end if
       if (debug) print *,'Current_length: ',current_length
       if (debug) print *,'Lower bound: ',lower

       ! We don't want to alter the return value of offset so we need to
       ! make a local version of it
       new_offset = offset

       ! A negative offset means we count from the end of the array, and
       ! -1 means the last entry of the array
       if (new_offset < 0) then
          new_offset = lower + current_length + new_offset
          if (new_offset < lower) new_offset = lower
       else
          ! Convert our offset from a relative to an absolute position
          new_offset = lower + new_offset
       end if
       if (debug) print *,'Offset: ',new_offset

       ! We don't want to alter the return value of length so we need to
       ! make a local version of it too
       if (present(length)) then
          new_length = length
          ! Tail is the number of elements left at the end of the array
          ! after offset + length elements have been removed
          tail = max(0,(lower + current_length - 1) - (new_offset + new_length - 1))
       else
          ! No length, so the new_length is to the end of the array, and
          ! there are no tail elements
          new_length = (lower + current_length - 1) - new_offset + 1
          tail = 0
       end if
       if (debug) print *,'Length: ',new_length
       if (debug) print *,'Tail: ',tail

       ! Replace length is the length of list we will put back into
       ! the array to replace the elements we are snipping out. This
       ! is initialised to zero as we are not even required to provide
       ! a replacement list
       replace_length = 0
       if (present(list)) then
          replace_length = size(list)
       end if
       if (debug) print *,'Replace length: ',replace_length

       ! Make a new array that is one less than the offset length plus
       ! the length of the list we are stuffing in plus whatever is left
       ! on the end
       ! allocate(buffer_array(lower:(lower-1)+(new_offset-1)+replace_length+tail), stat=status)
       allocate(buffer_array(lower:lower + &
            (((new_offset-1)-lower+1)+replace_length+tail) & ! length of new array
            - 1 ), stat=status)
       if (status /= 0) then
          print *,'module variable_array :: Error in allocating space for buffer array: ',status
          stop
       end if
       ! buffer_array = -9
       if (debug) print *,'Length of new array: ',size(buffer_array)

       ! Copy over everything up to (not including) offset as long as our
       ! new offset is greater than the start of the array (if not then we
       ! are probably shifting something on to the start of the array)
       if (array_associated .and. (new_offset > lower)) then
          buffer_array(lower:new_offset-1) = array(lower:new_offset-1)
          if (debug) print *,'First bit: ', buffer_array
       end if

       ! If we had a list to insert then place it now. Note that we use
       ! the replace length here ...
       if (present(list)) then
          buffer_array(new_offset:new_offset+replace_length-1) = list
          if (debug) print *,'List bit: ', buffer_array
       end if

       ! If we had elements left on the tail of array then place them on the 
       ! end. Note that we use replace length on the left and new length on
       ! the right. In this way we specify how much space our inserted text
       ! takes -- which can be as low as zero, which implies an insertion and
       ! not a deletion operation
       if (tail > 0) then
          buffer_array(new_offset+replace_length:) = array(new_offset+new_length:)
          if (debug) print *,'Tail bit: ', buffer_array
       end if

       ! Delete the original
       if (array_associated) deallocate(array)

       ! Associate array with the new version
       array => buffer_array

       array_length = size(array)

    else
       nullify(array)
    end if

  end function splice_character

  integer function push_character (array, argument) result(array_length)

    character(len=*), dimension(:), pointer :: array
    character(len=*), intent(in)            :: argument

    ! Make an array of length one out of single argument and push
    ! this (calls array push function below)
    array_length = push(array,(/ argument /))

  end function push_character

  integer function push_character_array (array, argument) result(array_length)

    character(len=*), dimension(:), pointer    :: array
    character(len=*), dimension(:), intent(in) :: argument

    integer :: current_size

    current_size = 0

    ! Grab the number of elements in array
    if (associated(array)) current_size = size(array)

    array_length = splice(array,current_size,0,argument)

  end function push_character_array

  function pop_character (array, status) result(popped)

    character(len=*), dimension(:), pointer :: array
    logical, optional, intent(out)          :: status
    
    ! Return type
    character(len=len(array))               :: popped

    integer :: current_size

    ! Grab the number of elements in array
    if (.not. associated(array)) then
       if (present(status)) then
          status = .false.
       else
          print *,'pop :: Attempted to access zero size array!'
          stop
       end if
    else
       if (present(status)) status = .true.
       popped = array(ubound(array,1))
       ! Remove the last element from the array
       current_size = splice(array,-1)
    end if

  end function pop_character

  integer function unshift_character (array, argument) result(array_length)

    character(len=*), dimension(:), pointer :: array
    character(len=*), intent(in)            :: argument

    ! Make an array of length one out of single argument and unshift
    ! this (calls array unshift function below)
    array_length = unshift(array,(/ argument /))

  end function unshift_character

  integer function unshift_character_array (array, argument) result(array_length)

    character(len=*), dimension(:), pointer    :: array
    character(len=*), dimension(:), intent(in) :: argument

    integer :: start

    start = 0

    ! Find the first element (lower bound) in the array
    if (associated(array)) start = lbound(array,1)

    array_length = splice(array,0,0,argument)

  end function unshift_character_array

  function shift_character (array, status) result(shifted)

    character(len=*), dimension(:), pointer :: array
    logical, optional, intent(out)          :: status

    ! Return type
    character(len=len(array))               :: shifted

    integer :: current_size, lower

    ! Grab the number of elements in array
    if (.not. associated(array)) then
       if (present(status)) then
          status = .false.
       else
          print *,'pop :: Attempted to access zero size array!'
          stop
       end if
    else
       if (present(status)) status = .true.
       shifted = array(lbound(array,1))
       ! Remove the first element from the array (recall that offset
       ! is relative to the lower bound, so 0 = lower bound of array)
       current_size = splice(array,0,1)
    end if

  end function shift_character

  integer function splice_vstring (array, offset, length, list) result(array_length)

    ! This function is meant to emulate the perl function 'splice' but on a
    ! pointer character array. So, here is the info on the perl function
    ! with some modification:
    !
  
    !   splice ARRAY,OFFSET,LENGTH,LIST
    !   splice ARRAY,OFFSET,LENGTH
    !   splice ARRAY,OFFSET
    !   splice ARRAY
    !           Removes the elements designated by OFFSET (from the lower bound of
    !           the array) and LENGTH from an
    !           array, and replaces them with the elements of LIST, if any.  
    !           Returns the number of elements removed in the array. The array 
    !           grows or shrinks as necessary.
    !           If OFFSET is negative then it starts that far from the end of the
    !           array.  If LENGTH is omitted, removes everything from OFFSET
    !           onward.  If LENGTH is negative, leaves that many elements off the
    !           end of the array.  If both OFFSET and LENGTH are omitted, removes
    !           everything.
    !
    !           The following equivalences hold (assuming the lower bound of array 
    !           is zero):
    !
    !               push(array,x)          splice(array,size(array)+1,0,x)
    !               push(array,(/x,y/))    splice(array,size(array)+1,0,(/x,y/))
    !               pop(array)             splice(array,-1)
    !               shift(array)           splice(array,0,1)
    !               unshift(array,x)       splice(array,0,0,x)
    !               array(x) = y           splice(array,x,1,y)

    ! The main differences between the perl version and this one are the definition
    ! of offset and the return value of the function. Here offset is a length from 
    ! the lower bound of the array (in perl it is an absolute position). This is
    ! so that we can usefully use arrays which start with lower bounds less than zero,
    ! as we want a negative offset to indicate counting from the end of an array.

    ! Some useful equalities to bear in mind when reading this code:
    !
    !          length of array = last element - first element + 1
    !          nth element of array = first element + n - 1

    type (varying_string), dimension(:), pointer  :: array
    integer, intent(in), optional                 :: offset, length
    type (varying_string), dimension(:), optional :: list

    type (varying_string), dimension(:), pointer :: buffer_array

    integer :: status, current_length, new_offset
    integer :: replace_length, new_length, lower, tail, i

    logical ::  array_associated

    array_length = 0

    if (present(offset)) then

       if (associated(array)) then
          ! Grab the number of elements in array
          current_length = size(array)
          ! And the index that the array starts at
          lower = lbound(array,1)
          array_associated = .true.
       else
          ! The array isn't associated, so we set the length to zero
          current_length = 0
          ! Assume the array index starts at one
          lower = 1
          array_associated = .false.
       end if
       if (debug) print *,'Current_length: ',current_length
       if (debug) print *,'Lower bound: ',lower

       ! We don't want to alter the return value of offset so we need to
       ! make a local version of it
       new_offset = offset

       ! A negative offset means we count from the end of the array, and
       ! -1 means the last entry of the array
       if (new_offset < 0) then
          new_offset = lower + current_length + new_offset
          if (new_offset < lower) new_offset = lower
       else
          ! Convert our offset from a relative to an absolute position
          new_offset = lower + new_offset
       end if
       if (debug) print *,'Offset: ',new_offset

       ! We don't want to alter the return value of length so we need to
       ! make a local version of it too
       if (present(length)) then
          new_length = length
          ! Tail is the number of elements left at the end of the array
          ! after offset + length elements have been removed
          tail = max(0,(lower + current_length - 1) - (new_offset + new_length - 1))
       else
          ! No length, so the new_length is to the end of the array, and
          ! there are no tail elements
          new_length = (lower + current_length - 1) - new_offset + 1
          tail = 0
       end if
       if (debug) print *,'Length: ',new_length
       if (debug) print *,'Tail: ',tail

       ! Replace length is the length of list we will put back into
       ! the array to replace the elements we are snipping out. This
       ! is initialised to zero as we are not even required to provide
       ! a replacement list
       replace_length = 0
       if (present(list)) then
          replace_length = size(list)
       end if
       if (debug) print *,'Replace length: ',replace_length

       ! Make a new array that is one less than the offset length plus
       ! the length of the list we are stuffing in plus whatever is left
       ! on the end
       ! allocate(buffer_array(lower:(lower-1)+(new_offset-1)+replace_length+tail), stat=status)
       allocate(buffer_array(lower:lower + &
            (((new_offset-1)-lower+1)+replace_length+tail) & ! length of new array
            - 1 ), stat=status)
       if (status /= 0) then
          print *,'module variable_array :: Error in allocating space for buffer array: ',status
          stop
       end if
       ! buffer_array = -9
       if (debug) print *,'Length of new array: ',size(buffer_array)

       ! Copy over everything up to (not including) offset as long as our
       ! new offset is greater than the start of the array (if not then we
       ! are probably shifting something on to the start of the array)
       if (array_associated .and. (new_offset > lower)) then
          buffer_array(lower:new_offset-1) = array(lower:new_offset-1)
          if (debug) print *,'First bit: ',char(buffer_array)
       end if

       ! If we had a list to insert then place it now. Note that we use
       ! the replace length here ...
       if (present(list)) then
          buffer_array(new_offset:new_offset+replace_length-1) = list
          ! if (debug) print *,'List bit: ', char(buffer_array)
       end if

       ! If we had elements left on the tail of array then place them on the 
       ! end. Note that we use replace length on the left and new length on
       ! the right. In this way we specify how much space our inserted text
       ! takes -- which can be as low as zero, which implies an insertion and
       ! not a deletion operation
       if (tail > 0) then
          buffer_array(new_offset+replace_length:) = array(new_offset+new_length:)
          ! if (debug) print *,'Tail bit: ', buffer_array
       end if

       ! Delete the original
       if (array_associated) deallocate(array)

       ! Associate array with the new version
       array => buffer_array

       array_length = size(array)

    else
       nullify(array)
    end if

  end function splice_vstring

  integer function splice_char_into_vstring (array, offset, length, list) result(array_length)

    ! This is just a wrapper for the main splice function, which
    ! allows the inserted list to be specified by a character 
    ! array rather than a varying string

    type (varying_string), dimension(:), pointer  :: array
    integer, intent(in), optional                 :: offset, length
    character(len=*), dimension(:)                :: list

    array_length = splice(array, offset, length, var_str(list))

  end function splice_char_into_vstring

  integer function push_vstring (array, argument) result(array_length)

    type (varying_string), dimension(:), pointer :: array
    type (varying_string), intent(in)            :: argument

    ! Make an array of length one out of single argument and push
    ! this (calls array push function below)
    array_length = push(array,(/ argument /))

  end function push_vstring

  integer function push_vstring_array (array, argument) result(array_length)

    type (varying_string), dimension(:), pointer    :: array
    type (varying_string), dimension(:), intent(in) :: argument

    integer :: current_size

    current_size = 0

    ! Grab the number of elements in array
    if (associated(array)) current_size = size(array)

    array_length = splice(array,current_size,0,argument)

  end function push_vstring_array

  integer function push_char_onto_vstring (array, argument) result(array_length)

    type (varying_string), dimension(:), pointer :: array
    character(len=*), intent(in)                 :: argument

    ! Make an array of length one out of single argument and push
    ! this (calls array push function below)
    array_length = push(array,var_str(argument))

  end function push_char_onto_vstring

  integer function push_char_array_onto_vstring (array, argument) result(array_length)

    type (varying_string), dimension(:), pointer :: array
    character(len=*), dimension(:), intent(in)   :: argument

    array_length = push(array, var_str(argument)) 

  end function push_char_array_onto_vstring

  function pop_vstring (array, status) result(popped)

    type (varying_string), dimension(:), pointer :: array
    logical, optional, intent(out)               :: status
    
    ! Return type
    type (varying_string) :: popped

    integer :: current_size

    ! Grab the number of elements in array
    if (.not. associated(array)) then
       if (present(status)) then
          status = .false.
       else
          print *,'pop :: Attempted to access zero size array!'
          stop
       end if
    else
       if (present(status)) status = .true.
       popped = array(ubound(array,1))
       ! Remove the last element from the array
       current_size = splice(array,-1)
    end if

  end function pop_vstring

  integer function unshift_vstring (array, argument) result(array_length)

    type (varying_string), dimension(:), pointer :: array
    type (varying_string), intent(in)            :: argument

    ! Make an array of length one out of single argument and unshift
    ! this (calls array unshift function below)
    array_length = unshift(array,(/ argument /))

  end function unshift_vstring

  integer function unshift_vstring_array (array, argument) result(array_length)

    type (varying_string), dimension(:), pointer    :: array
    type (varying_string), dimension(:), intent(in) :: argument

    integer :: start

    start = 0

    ! Find the first element (lower bound) in the array
    if (associated(array)) start = lbound(array,1)

    array_length = splice(array,0,0,argument)

  end function unshift_vstring_array

  integer function unshift_char_onto_vstring (array, argument) result(array_length)

    type (varying_string), dimension(:), pointer :: array
    character(len=*), intent(in)                 :: argument

    ! Make the character variable into a variable string and unshift that 
    array_length = unshift(array,var_str(argument))

  end function unshift_char_onto_vstring

  integer function unshift_char_array_onto_vstring (array, argument) result(array_length)

    type (varying_string), dimension(:), pointer :: array
    character(len=*), dimension(:), intent(in)   :: argument

    ! Make the character variable into a an array of variable strings and unshift that 
    array_length = unshift(array, var_str(argument))

  end function unshift_char_array_onto_vstring

  function shift_vstring (array, status) result(shifted)

    type (varying_string), dimension(:), pointer :: array
    logical, optional, intent(out)               :: status

    ! Return type
    type (varying_string) :: shifted

    integer :: current_size, lower

    ! Grab the number of elements in array
    if (.not. associated(array)) then
       if (present(status)) then
          status = .false.
       else
          print *,'pop :: Attempted to access zero size array!'
          stop
       end if
    else
       if (present(status)) status = .true.
       shifted = array(lbound(array,1))
       ! Remove the first element from the array (recall that offset
       ! is relative to the lower bound, so 0 = lower bound of array)
       current_size = splice(array,0,1)
    end if

  end function shift_vstring

  integer function splice_logical (array, offset, length, list) result(array_length)

    ! This function is meant to emulate the perl function 'splice' but on a
    ! pointer logical array. So, here is the info on the perl function
    ! with some modification:
    !
  
    !   splice ARRAY,OFFSET,LENGTH,LIST
    !   splice ARRAY,OFFSET,LENGTH
    !   splice ARRAY,OFFSET
    !   splice ARRAY
    !           Removes the elements designated by OFFSET (from the lower bound of
    !           the array) and LENGTH from an
    !           array, and replaces them with the elements of LIST, if any.  
    !           Returns the number of elements removed in the array. The array 
    !           grows or shrinks as necessary.
    !           If OFFSET is negative then it starts that far from the end of the
    !           array.  If LENGTH is omitted, removes everything from OFFSET
    !           onward.  If LENGTH is negative, leaves that many elements off the
    !           end of the array.  If both OFFSET and LENGTH are omitted, removes
    !           everything.
    !
    !           The following equivalences hold (assuming the lower bound of array 
    !           is zero):
    !
    !               push(array,x)          splice(array,size(array)+1,0,x)
    !               push(array,(/x,y/))    splice(array,size(array)+1,0,(/x,y/))
    !               pop(array)             splice(array,-1)
    !               shift(array)           splice(array,0,1)
    !               unshift(array,x)       splice(array,0,0,x)
    !               array(x) = y           splice(array,x,1,y)

    ! The main differences between the perl version and this one are the definition
    ! of offset and the return value of the function. Here offset is a length from 
    ! the lower bound of the array (in perl it is an absolute position). This is
    ! so that we can usefully use arrays which start with lower bounds less than zero,
    ! as we want a negative offset to indicate counting from the end of an array.

    ! Some useful equalities to bear in mind when reading this code:
    !
    !          length of array = last element - first element + 1
    !          nth element of array = first element + n - 1

    logical, dimension(:), pointer   :: array
    integer, intent(in), optional :: offset, length
    logical, dimension(:), optional  :: list

    logical, dimension(:), pointer :: buffer_array

    integer :: status, current_length, new_offset
    integer :: replace_length, new_length, lower, tail

    logical ::  array_associated

    array_length = 0

    if (present(offset)) then

       if (associated(array)) then
          ! Grab the number of elements in array
          current_length = size(array)
          ! And the index that the array starts at
          lower = lbound(array,1)
          array_associated = .true.
       else
          ! The array isn't associated, so we set the length to zero
          current_length = 0
          ! Assume the array index starts at one
          lower = 1
          array_associated = .false.
       end if
       if (debug) print *,'Current_length: ',current_length
       if (debug) print *,'Lower bound: ',lower

       ! We don't want to alter the return value of offset so we need to
       ! make a local version of it
       new_offset = offset

       ! A negative offset means we count from the end of the array, and
       ! -1 means the last entry of the array
       if (new_offset < 0) then
          new_offset = lower + current_length + new_offset
          if (new_offset < lower) new_offset = lower
       else
          ! Convert our offset from a relative to an absolute position
          new_offset = lower + new_offset
       end if
       if (debug) print *,'Offset: ',new_offset

       ! We don't want to alter the return value of length so we need to
       ! make a local version of it too
       if (present(length)) then
          new_length = length
          ! Tail is the number of elements left at the end of the array
          ! after offset + length elements have been removed
          tail = max(0,(lower + current_length - 1) - (new_offset + new_length - 1))
       else
          ! No length, so the new_length is to the end of the array, and
          ! there are no tail elements
          new_length = (lower + current_length - 1) - new_offset + 1
          tail = 0
       end if
       if (debug) print *,'Length: ',new_length
       if (debug) print *,'Tail: ',tail

       ! Replace length is the length of list we will put back into
       ! the array to replace the elements we are snipping out. This
       ! is initialised to zero as we are not even required to provide
       ! a replacement list
       replace_length = 0
       if (present(list)) then
          replace_length = size(list)
       end if
       if (debug) print *,'Replace length: ',replace_length

       ! Make a new array that is one less than the offset length plus
       ! the length of the list we are stuffing in plus whatever is left
       ! on the end
       ! allocate(buffer_array(lower:(lower-1)+(new_offset-1)+replace_length+tail), stat=status)
       allocate(buffer_array(lower:lower + &
            (((new_offset-1)-lower+1)+replace_length+tail) & ! length of new array
            - 1 ), stat=status)
       if (status /= 0) then
          print *,'module variable_array :: Error in allocating space for buffer array: ',status
          stop
       end if
       ! buffer_array = -9
       if (debug) print *,'Length of new array: ',size(buffer_array)

       ! Copy over everything up to (not including) offset as long as our
       ! new offset is greater than the start of the array (if not then we
       ! are probably shifting something on to the start of the array)
       if (array_associated .and. (new_offset > lower)) then
          buffer_array(lower:new_offset-1) = array(lower:new_offset-1)
          if (debug) print *,'First bit: ', buffer_array
       end if

       ! If we had a list to insert then place it now. Note that we use
       ! the replace length here ...
       if (present(list)) then
          buffer_array(new_offset:new_offset+replace_length-1) = list
          if (debug) print *,'List bit: ', buffer_array
       end if

       ! If we had elements left on the tail of array then place them on the 
       ! end. Note that we use replace length on the left and new length on
       ! the right. In this way we specify how much space our inserted text
       ! takes -- which can be as low as zero, which implies an insertion and
       ! not a deletion operation
       if (tail > 0) then
          buffer_array(new_offset+replace_length:) = array(new_offset+new_length:)
          if (debug) print *,'Tail bit: ', buffer_array
       end if

       ! Delete the original
       if (array_associated) deallocate(array)

       ! Associate array with the new version
       array => buffer_array

       array_length = size(array)

    else
       nullify(array)
    end if

  end function splice_logical

  integer function push_logical (array, argument) result(array_length)

    logical, dimension(:), pointer :: array
    logical, intent(in)            :: argument

    ! Make an array of length one out of single argument and push
    ! this (calls array push function below)
    array_length = push(array,(/ argument /))

  end function push_logical

  integer function push_logical_array (array, argument) result(array_length)

    logical, dimension(:), pointer    :: array
    logical, dimension(:), intent(in) :: argument

    integer :: current_size

    current_size = 0

    ! Grab the number of elements in array
    if (associated(array)) current_size = size(array)

    array_length = splice(array,current_size,0,argument)

  end function push_logical_array

  logical function pop_logical (array, status) result(popped)

    logical, dimension(:), pointer    :: array
    logical, optional, intent(out) :: status

    integer :: current_size

    ! Grab the number of elements in array
    if (.not. associated(array)) then
       if (present(status)) then
          status = .false.
       else
          print *,'pop :: Attempted to access zero size array!'
          stop
       end if
    else
       if (present(status)) status = .true.
       popped = array(ubound(array,1))
       ! Remove the last element from the array
       current_size = splice(array,-1)
    end if

  end function pop_logical

  integer function unshift_logical (array, argument) result(array_length)

    logical, dimension(:), pointer :: array
    logical, intent(in)            :: argument

    ! Make an array of length one out of single argument and unshift
    ! this (calls array unshift function below)
    array_length = unshift(array,(/ argument /))

  end function unshift_logical

  integer function unshift_logical_array (array, argument) result(array_length)

    logical, dimension(:), pointer    :: array
    logical, dimension(:), intent(in) :: argument

    integer :: start

    start = 0

    ! Find the first element (lower bound) in the array
    if (associated(array)) start = lbound(array,1)

    array_length = splice(array,0,0,argument)

  end function unshift_logical_array

  logical function shift_logical (array, status) result(shifted)

    logical, dimension(:), pointer    :: array
    logical, optional, intent(out) :: status

    integer :: current_size, lower

    ! Grab the number of elements in array
    if (.not. associated(array)) then
       if (present(status)) then
          status = .false.
       else
          print *,'pop :: Attempted to access zero size array!'
          stop
       end if
    else
       if (present(status)) status = .true.
       shifted = array(lbound(array,1))
       ! Remove the first element from the array (recall that offset
       ! is relative to the lower bound, so 0 = lower bound of array)
       current_size = splice(array,0,1)
    end if

  end function shift_logical


end module variable_array
