# Supplementary material for: A Process for Modelling Diffuse Scattering from Disordered Molecular Crystals, Illustrated by Application to Monoclinic 9-Chloro-10-methylanthracene
Source: Hindawi journal article supplement (doi:10.1155/2015/878463), 2015-01-01
Supplement: f2 [file 878463.f2.zip › 878463.f2/progs/ZMC_source/zmat_maker.f90]

program zmat_maker

  use simpose
  use fundamental_constants
  use cmdline_arguments, only: get_options, bad_options, have_args, option_exists, has_value, get_value, assignment(=), next_arg
  use mol2_class
  use quaternion_class
  use rotmatrix_class
  use zmatrix_class, only: zmatrix_object, assignment(=), as_xyz, as_zmatrix, print
  use file_functions, only: stderr, stdout, log, delete_file => delete
  use string_functions, only: join
  use iso_varying_string
  use variable_array

  implicit none

  !! $Log: zmat_maker.f90,v $
  !! Revision 1.5  2010/07/29 05:38:41  aidan
  !! Cleaned up the module import code to avoid namespace clashes when
  !! compiling with g95.
  !!
  !! Reduced loc_coincident to 1 Angstrom (from 4) as it was too high and
  !! gave incorrect results for ClClbenzylidene aniline.
  !!
  !! Added some debugging and a hard-compiled debug flag.
  !!
  !! Revision 1.4  2008/07/04 05:08:26  aidan
  !! Added the ability to automatically determine 'location' and 'type' in the
  !! unit cell and write this information to the qxyz file. Now this file will
  !! function as a map file to convert between my mol2 based contact files and
  !! Darren's system which is based on z-matrices, locations and molecule types
  !!
  !! Removed the templating stuff temporarily.
  !!
  !! Revision 1.3  2007/02/12 03:48:25  aidan
  !! Big code clean up. Took the fitting routine out into a separate function.
  !! Removed unused variables. Added command line arguments.
  !!
  !! Revision 1.2  2006/05/18 06:05:17  aidan
  !! Working version that can automatically output multiple z-matrices.
  !!
  !! Revision 1.1  2006/05/18 01:31:34  aidan
  !! Initial revision
  !!

  ! Revision control software updates this character parameter.
  ! The 'ident' command can extract this version string from an
  ! object file or executable, which means one can identify which
  ! version of the module was used to compile it.
  character(len=*), parameter :: version = "$Id: zmat_maker.f90,v 1.5 2010/07/29 05:38:41 aidan Exp $"

  type (mol2_object)    :: mol2
  type (zmatrix_object) :: zmat(100), zmat_template
  type (rotmatrix)      :: rmat

  type (quaternion)  :: q

  real    :: rsd, trans(3), rsd_limit, com(3), loc_coincident
  integer :: i, j, k, iz, numzmat, numloc, error, ind, loc, moltype, dontcare
  logical :: verbose, have_template, new_location

  character(len=1000)   :: fname, outname, buffer
  type (varying_string) :: myoptions(4)

  logical, parameter :: debug = .FALSE. !.TRUE.

  type location
     real :: coords(3)
     integer, pointer :: zmats(:), number(:)
  end type location

  type(location), allocatable :: locations(:)

  ! These are our accepted command line options (see subroutine usage for
  ! an explanation)
  myoptions(1) = 'help'
  myoptions(2) = 'rsd'
  myoptions(3) = 'quiet'
  myoptions(4) = 'locationtol'
  ! myoptions(5) = 'template'

  ! This call parses the command line arguments for command line options
  call get_options(myoptions, error)

  ! Check we weren't passed duff options -- spit the dummy if we were
  if (error > 0) then
     write(stderr,*) 'ERROR! Unknown options: ',join(bad_options()," ")
     call usage
     STOP
  end if

  ! Check if we just want to print the usage
  if (option_exists('help')) then
     call usage
     STOP
  end if

  if ( .not. have_args() ) then
     write(stderr,*) "Must provide a mol2 filename as command line argument"
     call usage
     stop
  end if

  verbose = .NOT. option_exists('quiet')

  ! See if we have a maximum rsd
  if (option_exists('rsd')) then
     ! Make sure we have a value
     if (.NOT. has_value('rsd')) then
        write(stderr,*) 'Option rsd must have a value!'
        call usage
        stop
     end if
     rsd_limit = get_value('rsd')
  else
     rsd_limit = 0.01
  end if

  ! See if we have a tolerance for deciding if molecules are on the same location
  if (option_exists('locationtol')) then
     ! Make sure we have a value
     if (.NOT. has_value('locationtol')) then
        write(stderr,*) 'Option locationtol must have a value!'
        call usage
        stop
     end if
     loc_coincident = get_value('locationtol')
  else
     loc_coincident = 1.
  end if

  ! See if we have specified a template z-matrix file
  if (option_exists('template')) then
     ! Make sure we have a value
     if (.NOT. has_value('template')) then
        write(stderr,*) 'Must specify a filename with the option template!'
        call usage
        stop
     end if
     fname = get_value('template')
     zmat_template = fname
     have_template = .TRUE.
  else
     have_template = .FALSE.
  end if

  ! Grab the mol2 file name from the command line
  fname = next_arg()

  ! Make a mol2 object from it
  mol2 = fname

  ! Use the input filename as a template for the output filename.
  ! Search for a ".mol2" suffix 
  ind = index(fname,".mol2")
  if (ind == 0) then
     ! Couldn't find a matching suffix, so look for the end of the
     ! filename string in the character variable
     ind = verify(fname," ",back=.TRUE.) + 1
  end if
  outname = fname
  ! Append new suffix
  outname(ind:) = ".qxyz"

  ! Delete an existing quaternion output file (ignoring an error 
  ! if one did not already exist)
  call delete_file(trim(outname),error)
     
  numzmat = 0
  numloc = 0

  ! Here we assume a worst case scenario and allocate as many locations
  ! as there are substructures. This is the upper bound.
  allocate(locations(sub_num(mol2)))

  ! For each substructure we attempt to find a quaternion
  ! and associated centre of mass translations that will
  ! map the cartesian coordinates converted from a z-matrix 
  ! onto those in the other substructure positions in the mol2 file
  do i = 1, sub_num(mol2)

     rsd = rsd_limit + 1e6
     iz = 0

     ! Loop over various options of z-matrix until we find a match or
     ! make a new one!
     do while (rsd > rsd_limit)
        iz = iz + 1
        if (iz > sub_num(mol2)) then
           write(stdout,'(A,I0)') 'WOAH! Something nasty has happened .. have failed to fit substructure ',i
           write(stdout,'(A)') 'below the rsd limit. There is probably something wrong with the z-matrix'
           write(stdout,'(A)') 'this program will produce. Examine it for any coincident atoms, reorder '
           write(stdout,'(A)') 'the definition for that atom and re-run.'
           ! write(stdout,'(A)') 'the definition for that atom and use this z-matrix as a template and re-run.'
           exit
        end if
        if (iz > numzmat) then
           ! Make a new z-matrix, as none of the other ones are a good fit
           numzmat = numzmat + 1
           if (have_template) then
              ! zmat(numzmat) = as_zmatrix(zmat_template,mol2,i)
           else
              zmat(numzmat) = as_zmatrix(mol2,i)
           end if
        end if
        rsd = fit(zmat(iz), coords(mol2,i), order(mol2,i), q, trans)
     end do

     com = sum(coords(mol2,i),dim=2)/real(atom_num(mol2,i))
     new_location = .true.

     if (debug) print *,'centre of mass: ',com

     NUMLOOP: do j = 1, numloc
        if (sum(abs(com - locations(j)%coords)) < loc_coincident) then
           if (debug) print *,'Same location as ',j
           ! These molecules are in the same place.
           loc = j
           new_location = .false.
           do k = 1, size(locations(j)%zmats)
              if (locations(j)%zmats(k) == iz) then
                 locations(j)%number(k) = locations(j)%number(k) + 1
                 moltype = locations(j)%number(k) 
                 exit NUMLOOP
              end if
           end do
           ! If we got here then there were no zmatrices of this type
           ! at this location. So we put a new zmat on this location, 
           ! with population 1
           dontcare = push(locations(j)%zmats,iz)
           dontcare = push(locations(j)%number,1)
           moltype = 1
        end if
     end do NUMLOOP

     if (new_location) then
        if (debug) print *,'New location'
        numloc = numloc + 1
        ! Shouldn't have to do this ....
        nullify(locations(numloc)%zmats, locations(numloc)%number)
        if (push(locations(numloc)%zmats,iz) /= 1) stop 'Error initialising location!'
        moltype = push(locations(numloc)%number,1)
        locations(numloc)%coords = com
        loc = numloc
     end if

     write(buffer,'(4I6, 4F11.6,2X,L2,3F14.6)') i, loc, iz, moltype, as_array(q), improper(q), trans
     call log(outname, trim(buffer))

     if (verbose) then
        write(stdout,'("  Sub structure: ",I0)') i
        write(stdout,'("       Z-matrix: ",I0)') iz
        write(stdout,'("     Quaternion: ",4F11.6)') as_array(q)
        write(stdout,'("       Improper: ",L4)') improper(q)
        write(stdout,'("COM Translation: ",3F11.6)') trans
        write(stdout,'("            RSD: ", F11.6)') rsd
     end if
     
  end do

  if (verbose) print *,'Saved quaternion data to ',trim(outname)

  do i = 1, numzmat
     outname = fname
     if (numzmat > 1) then
        write(outname(ind:),'(A,I0,A)') "_",i,".zmat"
     else
        outname(ind:) = ".zmat"
     end if
     call print(trim(outname),zmat(i))
     if (verbose) print *,'Writing ',trim(outname)
  end do
     
contains

  real function fit(zmat, coords, order, q, trans)

    ! Calculate the best fit quaternion and translation required
    ! to map a z-matrix on to a set of real space coordinates (NB: the 
    ! coordinates dimensions should be (3,n), n=number of atoms). 
    ! Returns the root mean square deviation between the real space 
    ! coordinates and the fitted z-matrix

    ! Interface variables
    type (zmatrix_object), intent(in) :: zmat
    real, intent(in)                  :: coords(:,:)
    integer, intent(in)               :: order(:)
    type (quaternion), intent(out)    :: q
    real, dimension(3), intent(out)   :: trans

    ! Local variables
    real             :: new_coords(size(coords,1),size(coords,2)) 
    real             :: deviation, deviation_invert
    type(quaternion) :: q1, q2
    real             :: trans1(3), trans2(3)

    ! Regenerate cartesian coordinates from the z-matrix
    new_coords = as_xyz(zmat)

    ! Find quaternion and translation relating z-matrix to cartesian coordinates
    deviation = superimpose(coords(:,order), new_coords, q1, trans1)
        
    ! Check to see we don't have a roto-inversion ... invert the z-matrix coordinates
    deviation_invert = superimpose(coords(:,order), -1*new_coords, q2, trans2)
        
    if (deviation > deviation_invert) then
       ! Accept the roto inverted solution
       q = q2
       trans = trans2
       fit = deviation_invert 
       ! Set the improper flag on the quaternion (we use a "faux" if 
       ! statement to satisfy the need for a return value)
       if(improper(q,.true.)) continue
    else
       q = q1
       trans = trans1
       fit = deviation
    end if

    ! Make it a mean square deviation
    ! fit = fit / real(size(new_coords))
    
  end function fit
    
  subroutine usage

    write(stderr,*)
    write(stderr,*) 'zmat_maker takes a mol2 file and fits a z-matrix to each'
    write(stderr,*) 'residue (i.e. molecule). The minimum number of z-matrices'
    write(stderr,*) 'are generated and a quaternion and centre of mass translation'
    write(stderr,*) 'is output for each residue. A new z-matrix is required when' 
    write(stderr,*) 'a fit exceeds the root square deviation (RSD) limit.'
    write(stderr,*)
    write(stderr,*) 'Usage: zmat_maker [--help] [--quiet] [--rsd=value] mol2file'
    ! write(stderr,*) 'Usage: zmat_maker [--help] [--quiet] [--rsd=value] [--template=zmatrix_file] mol2file'
    write(stderr,*)
    write(stderr,*) '  --help     - print this message'
    write(stderr,*) '  --quiet    - less verbose output'
    write(stderr,*) '  --rsd      - the value at which a new z-matrix is created'
    ! write(stderr,*) '  --template - specify a template z-matrix file'
    write(stderr,*)

  end subroutine usage

end program zmat_maker
