# Supplementary material for: A Process for Modelling Diffuse Scattering from Disordered Molecular Crystals, Illustrated by Application to Monoclinic 9-Chloro-10-methylanthracene
Source: Hindawi journal article supplement (doi:10.1155/2015/878463), 2015-01-01
Supplement: f2 [file 878463.f2.zip › 878463.f2/README.txt]

This archive contains two subdirectories. 

(1)  progs   

Contains programs that are general -- not specific to the CMA problem
discussed.  These may be best put in you path.  Note that this example was
performed using cygwin under Windows 7, but that source and Linux and Mac
binaries are also available (source files are in the /ZMC_source subdirectory).

(2)  CMA_simulations 

Contains the CMA simulation.  Input files, output files, and computer code
specific to that simulation.  Refer especially to Building_the_model.tex, which
should be processed using pdflatex or latex to get the documentation.

darren.goossens@gmail.com

March/April 2015
